# Supplementary material for: Pathogenesis-related proteins are evolutionarily conserved across diploid and octoploid Fragaria species
Source: Research Square preprint supplement (doi:10.21203/rs.3.rs-7264946/v1), 2025-08-27
Supplement: Supplementary file 1 [file 4ce46d62b1257e1a7abc331e.xlsx]

## Sheet: Sheet1
F vesca Hawaii4	F x ananassa Royal Royce Subgenome A	F x ananassa Royal Royce Subgenome B	F x ananassa Royal Royce Subgenome C	F x ananassa Royal Royce Subgenome D
FvH4_1g01362	Fxa1Ag100128	.	.	.
FvH4_1g01365	Fxa1Ag100131	.	.	Fxa1Dg200109
FvH4_1g01383	Fxa1Ag100127	Fxa1Bg200119	Fxa1Cg100121	.
.	.	Fxa1Bg200120	Fxa1Cg100122	.
.	.	.	Fxa1Cg100130	.
FvH4_1g02990	Fxa1Ag100274	Fxa1Bg200265	Fxa1Cg100237	Fxa1Dg200248
FvH4_1g03220	Fxa1Ag100297	Fxa1Bg200288	Fxa1Cg100260	Fxa1Dg200270
.	.	Fxa1Bg200413	.	.
FvH4_1g05390	Fxa1Ag100477	Fxa1Bg200470	Fxa1Cg100445	.
FvH4_1g06440	Fxa1Ag100568	Fxa1Bg200546	Fxa1Cg100525	Fxa1Dg200499
FvH4_1g07400	Fxa1Ag100665	Fxa1Bg200636	Fxa1Cg100628	Fxa1Dg200579
.	Fxa1Ag100758	Fxa1Bg200720	.	Fxa1Dg200667
.	Fxa1Ag100759	.	Fxa1Cg100729	.
FvH4_1g08530	Fxa1Ag100760	.	Fxa1Cg100730	Fxa1Dg200668
FvH4_1g08540	Fxa1Ag100762	Fxa1Bg200722	Fxa1Cg100732	Fxa1Dg200670
FvH4_1g08550	Fxa1Ag100763	.	Fxa1Cg100734	.
FvH4_1g08840	Fxa1Ag100794	Fxa1Bg200747	Fxa1Cg100758	Fxa1Dg200690
FvH4_1g09350	Fxa1AgPR7_1	.	Fxa1CgPR7_3	Fxa1DgPR7_4
FvH4_1g09660	Fxa1Ag100877	Fxa1Bg200823	Fxa1Cg100834	Fxa1Dg200754
FvH4_1g09800	Fxa1Ag100889	Fxa1Bg200841	Fxa1Cg100846	Fxa1Dg200765
.	Fxa1Ag100971	.	Fxa1Cg100919	.
FvH4_1g10642	.	.	Fxa1Cg100920	.
.	.	.	.	Fxa1Dg200848
FvH4_1g10661	Fxa1Ag100972	Fxa1Bg200909	.	Fxa1Dg200849
FvH4_1g11220	Fxa1Ag101028	Fxa1Bg200961	Fxa1Cg100977	Fxa1Dg200906
FvH4_1g11710	Fxa1Ag101076	Fxa1Bg201005	Fxa1Cg101019	Fxa1Dg200952
FvH4_1g12490	Fxa1Ag101154	Fxa1Bg201083	Fxa1Cg101107	Fxa1Dg201043
.	.	.	Fxa1Cg101257	.
FvH4_1g14371	.	.	Fxa1Cg101299	.
FvH4_1g14380	Fxa1Ag101329	Fxa1Bg201230	Fxa1Cg101298	Fxa1Dg201184
FvH4_1g14380	Fxa1Ag101329	Fxa1Bg201230	Fxa1Cg101298	Fxa1Dg201184
.	Fxa1Ag101408	Fxa1Bg201301	.	Fxa1Dg201265
FvH4_1g15550	.	.	Fxa1Cg101375	.
FvH4_1g15551	.	.	Fxa1Cg101377	.
FvH4_1g16171	Fxa1Ag101472	.	.	.
FvH4_1g16190	Fxa1Ag101473	Fxa1Bg201383	.	Fxa1Dg201347
FvH4_1g17150	Fxa1Ag101566	Fxa1Bg201443	Fxa1Cg101523	Fxa1Dg201421
FvH4_1g17340	Fxa1Ag101579	Fxa1Bg201460	Fxa1Cg101538	Fxa1Dg201437
FvH4_1g17490	Fxa1Ag101594	Fxa1Bg201472	Fxa1Cg101560	Fxa1Dg201455
FvH4_1g18170	Fxa1Ag101660	Fxa1Bg201535	Fxa1Cg101620	Fxa1Dg201509
FvH4_1g18630	Fxa1Ag101696	Fxa1Bg201576	Fxa1Cg101670	Fxa1Dg201555
FvH4_1g20360	Fxa1Ag101870	Fxa1Bg201756	Fxa1Cg101844	Fxa1Dg201735
FvH4_1g22980	Fxa1Ag102106	Fxa1Bg201988	.	.
.	.	.	Fxa1Cg102102	.
FvH4_1g22990	Fxa1Ag102107	Fxa1Bg201989	Fxa1Cg102103	.
.	Fxa1Ag102194	.	.	.
FvH4_1g25350	Fxa1Ag102375	Fxa1Bg202251	Fxa1Cg102394	Fxa1Dg201980
.	.	Fxa1Bg202343	.	.
FvH4_1g26180	Fxa1Ag102473	.	Fxa1Cg102516	Fxa1Dg202299
.	Fxa1Ag102648	.	.	.
FvH4_1g28000	.	Fxa1Bg202889	Fxa1Cg103023	.
.	Fxa1AgPR18_1	.	.	.
FvH4_1g30380	Fxa1Ag102683	Fxa1Bg202766	.	Fxa1Dg202924
FvH4_2g00110	Fxa2Ag100015	Fxa2Bg200041	.	.
FvH4_2g01410	Fxa2Ag100140	Fxa2Bg200089	.	Fxa2Dg200100
FvH4_2g01540	Fxa2Ag100152	Fxa2Bg200107	.	Fxa2Dg200117
.	.	.	Fxa2Cg201342	.
FvH4_2g01560	Fxa2Ag100154	.	.	Fxa2Dg200120
FvH4_2g02120	Fxa2Ag100194	.	.	.
FvH4_2g02140	.	Fxa2Bg200149	Fxa2Cg201381	Fxa2Dg200165
FvH4_2g02810	Fxa2Ag100251	Fxa2Bg200179	Fxa2Cg201390	Fxa2Dg200227
FvH4_2g02860	Fxa2Ag100256	.	.	Fxa2Dg200224
FvH4_2g02890	Fxa2Ag100252	Fxa2Bg200180	Fxa2Cg201453	Fxa2Dg200228
FvH4_2g02921	Fxa2Ag100257	.	Fxa2Cg201454	Fxa2Dg200222
FvH4_2g02940	Fxa2Ag100258	.	.	.
.	.	Fxa2Bg200185	.	.
FvH4_2g02950	Fxa2Ag100259	.	.	Fxa2Dg200230
FvH4_2g05000	Fxa2Ag100470	.	.	Fxa2Dg200460
.	Fxa2AgPR17_1	.	.	.
FvH4_2g05010	.	Fxa2Bg200376	.	Fxa2DgPR17_4
FvH4_2g05020	.	.	.	Fxa2Dg200462
FvH4_2g05030	Fxa2AgPR17_2	Fxa2Bg200379	.	Fxa2Dg200464
.	Fxa2AgPR17_3	.	.	.
FvH4_2g05130	.	Fxa2Bg200387	.	.
FvH4_2g05370	Fxa2Ag100504	Fxa2Bg200415	.	.
FvH4_2g06460	Fxa2Ag100620	Fxa2Bg200518	.	.
.	.	Fxa2Bg200519	.	.
FvH4_2g06860	Fxa2Ag100657	.	Fxa2Cg201719	.
FvH4_2g07020	Fxa2Ag100671	Fxa2Bg200574	.	.
FvH4_2g08690	Fxa2Ag100846	Fxa2Bg200710	Fxa2Cg201815	.
FvH4_2g10210	Fxa2Ag101004	Fxa2Bg200892	.	Fxa2Dg200874
.	Fxa2Ag101006	.	.	.
FvH4_2g10460	Fxa2Ag101032	Fxa2Bg200912	Fxa2Cg201943	Fxa2Dg200895
FvH4_2g13110	Fxa2Ag101319	Fxa2Bg201155	.	Fxa2Dg201139
.	Fxa2Ag101540	.	.	.
FvH4_2g16190	Fxa2Ag101657	Fxa2Bg201460	.	Fxa2Dg201423
.	.	Fxa2Bg201478	.	.
FvH4_2g16860	Fxa2Ag101720	Fxa2Bg201535	.	Fxa2Dg201486
.	.	Fxa2Bg201690	.	.
FvH4_2g18190	.	Fxa2Bg201691	Fxa2Cg202662	.
FvH4_2g18200	Fxa2Ag101877	Fxa2Bg201692	Fxa2Cg202663	.
FvH4_2g18711	Fxa2AgPR5_1	Fxa2Bg201749	.	.
FvH4_2g20460	Fxa2Ag102078	Fxa2Bg201914	Fxa2Cg202843	Fxa2Dg201787
.	.	.	.	Fxa2Dg201821
FvH4_2g26151	Fxa2Ag102622	Fxa2Bg202478	Fxa2Cg203370	Fxa2Dg202499
FvH4_2g26400	Fxa2Ag102647	.	Fxa2Cg203404	Fxa2Dg202476
FvH4_2g26620	Fxa2Ag102675	Fxa2Bg202520	Fxa2Cg203427	Fxa2Dg202454
FvH4_2g29970	Fxa2Ag102971	Fxa2Bg202794	Fxa2Cg201091	.
FvH4_2g30540	Fxa2Ag103017	Fxa2Bg202845	Fxa2Cg201053	Fxa2Dg202622
FvH4_2g30580	Fxa2Ag103028	Fxa2Bg202849	Fxa2Cg201049	Fxa2Dg202617
.	.	.	Fxa2Cg200799	.
.	.	Fxa2Bg203079	.	.
.	Fxa2Ag103284	.	.	.
FvH4_2g33321	.	.	.	Fxa2Dg202869
FvH4_2g33340	.	.	.	Fxa2Dg202870
FvH4_2g34120	.	Fxa2Bg203137	Fxa2Cg200727	.
FvH4_2g34170	Fxa2Ag103345	.	Fxa2Cg200722	Fxa2Dg202931
.	Fxa2Ag103348	Fxa2Bg203138	.	.
FvH4_2g34210	Fxa2Ag103349	.	Fxa2Cg200726	Fxa2Dg202930
.	.	.	Fxa2Cg200725	.
.	.	.	Fxa2Cg200724	.
FvH4_2g34211	Fxa2Ag103350	.	Fxa2Cg200723	.
FvH4_2g36870	Fxa2AgPR9_1	Fxa2Bg203361	Fxa2Cg200470	Fxa2Dg203156
FvH4_2g38090	Fxa2Ag103713	Fxa2Bg203510	Fxa2Cg200345	Fxa2Dg203270
.	.	.	Fxa2CgPR16_2	.
.	.	.	Fxa2CgPR16_1	.
FvH4_2g38310	Fxa2Ag103735	Fxa2Bg203489	Fxa2Cg200322	Fxa2Dg203292
FvH4_2g39290	Fxa2Ag103827	Fxa2Bg203395	Fxa2Cg200222	Fxa2Dg203395
.	Fxa2Ag103845	Fxa2Bg203597	Fxa2Cg200202	Fxa2Dg203415
FvH4_2g39880	Fxa2Ag103885	.	Fxa2Cg200158	Fxa2Dg203463
FvH4_2g40300	Fxa2Ag103924	Fxa2Bg203676	Fxa2Cg200121	Fxa2Dg203504
FvH4_2g40880	Fxa2Ag103973	Fxa2Bg203731	Fxa2Cg200068	.
.	.	.	.	Fxa2Dg203559
FvH4_2g41361	Fxa2Ag104019	Fxa2Bg203778	Fxa2Cg200016	Fxa2Dg203612
FvH4_3g00161	Fxa3Ag100017	Fxa3Bg200015	Fxa3CgPR7_10	Fxa3Dg200015
FvH4_3g00190	Fxa3Ag100021	Fxa3Bg200023	Fxa3Cg100022	Fxa3Dg200018
FvH4_3g01190	Fxa3Ag100110	Fxa3Bg200114	.	.
FvH4_3g01420	Fxa3Ag100129	Fxa3Bg200132	Fxa3Cg100119	Fxa3Dg200116
FvH4_3g01880	Fxa3Ag100164	Fxa3Bg200167	Fxa3Cg100156	Fxa3Dg200136
FvH4_3g02090	Fxa3Ag100186	Fxa3Bg200185	Fxa3Cg100175	Fxa3Dg200161
FvH4_3g02700	Fxa3Ag100239	Fxa3Bg200246	Fxa3Cg100241	Fxa3Dg200213
FvH4_3g05490	Fxa3Ag100509	Fxa3Bg200481	Fxa3Cg100463	Fxa3Dg200451
FvH4_3g05950	Fxa3Ag100552	Fxa3Bg200514	.	.
.	.	Fxa3Bg200527	Fxa3Cg100517	.
.	.	.	.	Fxa3Dg200496
FvH4_3g06570	Fxa3Ag100614	Fxa3Bg200566	Fxa3Cg100560	Fxa3Dg200536
.	.	.	.	Fxa3Dg200575
.	.	.	.	Fxa3Dg200576
FvH4_3g08590	Fxa3Ag100798	.	Fxa3Cg100730	.
FvH4_3g08600	Fxa3Ag100799	.	Fxa3Cg100731	.
FvH4_3g09840	Fxa3Ag100935	.	Fxa3Cg100829	Fxa3Dg200778
FvH4_3g10240	Fxa3Ag100972	Fxa3Bg200870	Fxa3Cg100861	.
FvH4_3g10630	Fxa3Ag101002	Fxa3Bg200899	Fxa3Cg100883	.
.	Fxa3Ag100995	Fxa3Bg200894	Fxa3Cg100878	Fxa3Dg200826
FvH4_3g10650	Fxa3Ag100996	Fxa3Bg200896	Fxa3Cg100879	Fxa3Dg200827
.	.	.	.	Fxa3Dg200830
FvH4_3g10830	Fxa3Ag101015	.	Fxa3Cg100893	Fxa3Dg200835
.	.	Fxa3Bg200904	Fxa3Cg100895	Fxa3Dg200844
FvH4_3g10860	.	.	Fxa3Cg100897	.
.	Fxa3Ag101016	.	.	Fxa3Dg200836
.	.	.	.	Fxa3Dg200843
FvH4_3g10920	Fxa3Ag101017	Fxa3Bg200905	Fxa3Cg100894	Fxa3Dg200838
FvH4_3g10930	.	.	.	Fxa3Dg200845
.	.	Fxa3Bg200907	.	.
FvH4_3g10960	Fxa3Ag101020	Fxa3Bg200908	Fxa3Cg100898	.
.	.	Fxa3Bg200910	Fxa3Cg100903	.
.	.	Fxa3Bg200911	Fxa3Cg100899	.
.	.	.	Fxa3Cg100902	.
.	Fxa3Ag101023	.	.	.
.	Fxa3Ag101024	Fxa3Bg200914	Fxa3Cg100905	.
.	Fxa3Ag101026	Fxa3Bg200916	Fxa3Cg100907	.
FvH4_3g11043	Fxa3Ag101027	Fxa3Bg200917	Fxa3Cg100908	.
FvH4_3g11090	Fxa3Ag101032	Fxa3Bg200919	.	.
.	.	.	.	Fxa3Dg200847
FvH4_3g11270	Fxa3Ag101050	.	.	.
FvH4_3g11300	Fxa3Ag101054	.	Fxa3Cg100937	.
.	.	Fxa3Bg200940	.	.
FvH4_3g11330	.	.	Fxa3Cg100939	.
.	.	Fxa3Bg200963	.	.
.	.	.	.	Fxa3Dg200885
.	Fxa3Ag101074	.	Fxa3Cg100958	.
FvH4_3g11680	Fxa3Ag101086	Fxa3Bg200973	.	Fxa3Dg200907
FvH4_3g13260	Fxa3Ag101223	Fxa3Bg201118	Fxa3Cg101092	Fxa3Dg201053
FvH4_3g13910	Fxa3Ag101284	Fxa3Bg201166	Fxa3Cg101146	Fxa3Dg201106
FvH4_3g15220	Fxa3Ag101392	Fxa3Bg201262	Fxa3Cg101246	Fxa3Dg201200
FvH4_3g15230	Fxa3Ag101396	Fxa3Bg201264	Fxa3Cg101248	Fxa3Dg201198
.	Fxa3Ag101394	.	.	.
FvH4_3g19440	Fxa3Ag101814	.	.	.
.	.	Fxa3Bg201503	.	.
FvH4_3g20400	Fxa3Ag101916	.	Fxa3Cg101694	Fxa3Dg201632
FvH4_3g20670	Fxa3Ag101948	Fxa3Bg201711	Fxa3Cg101720	Fxa3Dg201659
FvH4_3g23410	Fxa3Ag102226	Fxa3Bg202022	.	.
.	Fxa3Ag102351	.	.	.
FvH4_3g24600	Fxa3Ag102352	Fxa3Bg202148	Fxa3Cg102073	Fxa3Dg202109
FvH4_3g24930	Fxa3Ag102387	Fxa3Bg202178	Fxa3Cg102100	Fxa3Dg202068
FvH4_3g25270	Fxa3Ag102423	.	Fxa3Cg102122	.
FvH4_3g25280	Fxa3Ag102425	.	Fxa3Cg102121	.
FvH4_3g25310	Fxa3Ag102428	.	.	.
FvH4_3g25320	Fxa3Ag102429	.	.	.
FvH4_3g25340	Fxa3Ag102431	.	.	.
FvH4_3g26010	Fxa3Ag102499	.	.	.
.	.	.	.	Fxa3DgPR4_1.1
.	Fxa3AgPR7_6	.	.	.
.	Fxa3AgPR7_5	.	.	.
FvH4_3g26850	Fxa3Ag102584	Fxa3Bg202311	Fxa3Cg102206	.
FvH4_3g28370	Fxa3Ag102739	Fxa3Bg202427	Fxa3Cg102355	.
FvH4_3g31110	.	.	.	Fxa3Dg202624
.	Fxa3Ag103154	.	.	.
FvH4_3g33200	Fxa3AgPR7_7	.	Fxa3Cg102770	.
.	.	.	.	Fxa3Dg202763
FvH4_3g35670	Fxa3Ag103349	Fxa3Bg203030	.	.
FvH4_3g36150	Fxa3Ag103398	Fxa3Bg203085	Fxa3Cg103016	Fxa3Dg202938
.	.	.	.	Fxa3Dg202942
FvH4_3g37170	Fxa3Ag103474	Fxa3Bg203167	Fxa3Cg103092	Fxa3Dg203009
.	.	Fxa3Bg203349	.	.
.	Fxa3Ag103677	.	.	.
FvH4_3g39500	Fxa3Ag103689	Fxa3Bg203365	Fxa3Cg103300	Fxa3Dg203164
FvH4_3g40080	Fxa3Ag103743	Fxa3Bg203426	Fxa3Cg103354	Fxa3Dg203216
FvH4_3g40090	Fxa3Ag103744	Fxa3Bg203427	Fxa3Cg103355	Fxa3Dg203217
FvH4_3g40140	Fxa3Ag103748	.	Fxa3Cg103357	.
.	.	.	.	Fxa3Dg203219
.	Fxa3AgPR7_8	.	.	.
.	Fxa3AgPR7_9	.	.	.
FvH4_3g40150	Fxa3Ag103751	Fxa3Bg203429	Fxa3Cg103359	.
FvH4_3g40160	.	.	Fxa3Cg103360	.
.	Fxa3Ag103752	.	.	.
.	.	Fxa3Bg203430	.	.
FvH4_3g40180	.	Fxa3Bg203432	Fxa3Cg103362	.
FvH4_3g40460	Fxa3Ag103787	Fxa3Bg203459	Fxa3Cg103387	.
FvH4_3g42040	Fxa3Ag103935	Fxa3Bg203591	Fxa3Cg103519	Fxa3Dg203381
FvH4_3g42350	Fxa3Ag103977	Fxa3Bg203618	Fxa3Cg103550	.
.	.	.	Fxa3CgPR7_11	.
FvH4_3g44351	Fxa3Ag104186	Fxa3Bg203775	Fxa3Cg103704	Fxa3Dg203567
FvH4_3g45330	Fxa3Ag104259	Fxa3Bg203832	Fxa3Cg103766	Fxa3Dg203634
FvH4_3g45830	Fxa3Ag104321	Fxa3Bg203877	Fxa3Cg103814	Fxa3Dg203686
FvH4_4g00080	Fxa4Ag100007	Fxa4Bg100005	Fxa4Cg200004	Fxa4Dg100004
FvH4_4g02840	Fxa4Ag100208	.	Fxa4Cg200178	.
.	.	Fxa4Bg100203	.	.
FvH4_4g02850	.	.	Fxa4CgPR6_4	.
FvH4_4g02860	Fxa4AgPR6_1	Fxa4Bg100204	Fxa4CgPR6_7	.
FvH4_4g02870	.	.	Fxa4CgPR6_6	.
.	Fxa4Ag100209	Fxa4Bg100206	.	.
FvH4_4g02880	.	Fxa4BgPR6_3	Fxa4CgPR6_8	.
FvH4_4g02930	Fxa4Ag100213	.	Fxa4Cg200182	.
FvH4_4g02940	Fxa4AgPR6_2	.	.	.
FvH4_4g04210	Fxa4Ag100336	Fxa4Bg100334	Fxa4Cg200300	.
.	Fxa4Ag100659	.	.	.
FvH4_4g07370	Fxa4Ag100661	Fxa4Bg100662	Fxa4Cg200852	Fxa4Dg100535
FvH4_4g07570	Fxa4Ag100681	.	.	.
FvH4_4g07750	Fxa4Ag100700	Fxa4Bg100695	Fxa4Cg200809	.
.	.	Fxa4Bg100831	.	Fxa4Dg100661
.	.	Fxa4Bg100822	.	Fxa4Dg100662
FvH4_4g09940	Fxa4Ag100903	.	.	.
FvH4_4g09950	Fxa4Ag100904	.	.	.
FvH4_4g10600	Fxa4Ag100974	.	Fxa4Cg200580	.
.	.	Fxa4BgPR3_1	.	.
.	.	Fxa4Bg101048	.	.
FvH4_4g10610	Fxa4Ag100976	.	Fxa4Cg200577	.
FvH4_4g10640	Fxa4Ag100980	Fxa4Bg101053	.	Fxa4Dg100808
.	.	.	Fxa4Cg200892	.
FvH4_4g11930	Fxa4Ag101145	Fxa4Bg101163	.	Fxa4Dg100834
FvH4_4g13120	Fxa4Ag101282	.	Fxa4Cg201108	.
.	Fxa4Ag101599	.	.	.
.	Fxa4Ag101383	.	.	.
.	Fxa4Ag101382	.	.	.
FvH4_4g16970	Fxa4Ag101692	Fxa4Bg101640	Fxa4Cg201411	Fxa4Dg101306
FvH4_4g18000	Fxa4Ag101794	Fxa4Bg101728	Fxa4Cg201514	Fxa4Dg101386
FvH4_4g19061	.	.	Fxa4Cg201585	.
.	Fxa4Ag101871	Fxa4Bg101810	Fxa4Cg201586	.
.	.	Fxa4Bg101812	.	.
.	.	.	Fxa4Cg201587	.
FvH4_4g18960	Fxa4Ag101884	Fxa4Bg101824	Fxa4Cg201597	Fxa4Dg101452
FvH4_4g18970	Fxa4Ag101872	.	Fxa4Cg201600	.
FvH4_4g18990	.	Fxa4Bg101825	Fxa4Cg201598	Fxa4Dg101453
.	Fxa4Ag101887	.	.	.
.	.	Fxa4Bg101827	.	.
FvH4_4g19010	.	.	Fxa4Cg201599	.
FvH4_4g18840	.	Fxa4Bg101828	Fxa4Cg201601	Fxa4Dg101456
FvH4_4g19020	.	Fxa4Bg101829	.	.
FvH4_4g19050	.	.	Fxa4Cg201602	.
FvH4_4g19060	Fxa4Ag101890	Fxa4Bg101811	Fxa4Cg201604	.
.	.	.	.	Fxa4Dg101457
FvH4_4g18850	Fxa4Ag101889	.	Fxa4Cg201606	.
.	.	Fxa4Bg101833	.	Fxa4Dg101458
FvH4_4g19120	.	.	Fxa4Cg201608	.
.	.	Fxa4Bg101836	Fxa4Cg201603	.
.	.	.	.	Fxa4Dg101459
.	.	Fxa4Bg101837	.	.
.	Fxa4Ag101888	.	Fxa4Cg201610	.
FvH4_4g19150	Fxa4Ag101895	.	.	.
FvH4_4g19170	Fxa4Ag101896	Fxa4Bg101840	Fxa4Cg201612	.
FvH4_4g19370	Fxa4Ag101928	Fxa4Bg101867	Fxa4Cg201637	Fxa4Dg101479
FvH4_4g19500	Fxa4Ag101943	Fxa4Bg101880	.	.
.	Fxa4Ag101967	.	.	Fxa4Dg101511
.	.	Fxa4Bg101900	.	.
.	Fxa4Ag101968	Fxa4Bg101901	.	Fxa4Dg101512
FvH4_4g19850	Fxa4Ag101985	Fxa4Bg101912	.	Fxa4Dg101525
FvH4_4g20220	Fxa4Ag102006	Fxa4Bg101930	Fxa4Cg201690	Fxa4Dg101544
FvH4_4g25120	.	.	Fxa4Cg202083	Fxa4Dg101927
FvH4_4g25140	.	Fxa4Bg102387	Fxa4Cg202084	Fxa4Dg101928
.	Fxa4Ag102435	.	.	.
.	.	.	.	Fxa4Dg101971
.	.	.	.	Fxa4Dg101972
.	.	.	.	Fxa4Dg101973
FvH4_4g25890	Fxa4Ag102502	Fxa4Bg102457	Fxa4Cg202165	.
FvH4_4g28680	Fxa4Ag102764	Fxa4Bg102680	Fxa4Cg202435	Fxa4Dg102218
FvH4_4g29790	Fxa4Ag102844	Fxa4Bg102742	Fxa4Cg202506	Fxa4Dg102293
FvH4_4g29811	Fxa4Ag102847	.	Fxa4Cg202511	Fxa4Dg102296
FvH4_4g30150	Fxa4Ag102889	.	.	.
FvH4_4g33870	Fxa4Ag103230	Fxa4Bg103064	Fxa4Cg202845	Fxa4Dg102641
FvH4_4g34270	Fxa4Ag103269	Fxa4Bg103097	Fxa4Cg202881	Fxa4Dg102676
.	.	Fxa4Bg103167	.	Fxa4Dg102747
FvH4_4g35250	Fxa4Ag103358	Fxa4Bg103176	Fxa4Cg202970	Fxa4Dg102758
FvH4_4g36130	Fxa4Ag103448	Fxa4Bg103247	Fxa4Cg203042	Fxa4Dg102826
.	.	Fxa5Bg100077	.	Fxa5Dg200065
FvH4_5g00780	Fxa5Ag200076	.	Fxa5Cg200064	Fxa5Dg200064
.	.	Fxa5Bg100116	.	.
FvH4_5g01093	Fxa5Ag200107	Fxa5Bg100115	Fxa5Cg200095	Fxa5Dg200099
.	.	.	Fxa5Cg200110	.
FvH4_5g01310	Fxa5Ag200122	Fxa5Bg100132	Fxa5CgPR7_12	Fxa5Dg200117
FvH4_5g01810	.	.	Fxa5Cg200150	.
FvH4_5g01820	.	.	Fxa5Cg200149	.
.	Fxa5Ag200169	Fxa5Bg100176	.	.
FvH4_5g01840	.	.	Fxa5Cg200151	.
FvH4_5g06210	.	Fxa5Bg100535	.	.
.	Fxa5Ag200561	.	.	.
FvH4_5g06220	Fxa5Ag200562	Fxa5Bg100536	.	.
FvH4_5g07630	Fxa5Ag200646	Fxa5Bg100633	Fxa5Cg200585	.
FvH4_5g09980	Fxa5Ag200846	Fxa5Bg100811	Fxa5Cg200732	.
FvH4_5g10490	.	.	Fxa5Cg200773	Fxa5Dg200814
.	Fxa5Ag200889	Fxa5Bg100854	.	.
FvH4_5g10502	.	.	Fxa5Cg200776	Fxa5Dg200817
FvH4_5g10600	.	Fxa5Bg100862	Fxa5Cg200783	Fxa5Dg200825
.	Fxa5AgPR11_1	.	.	.
FvH4_5g15981	Fxa5Ag201401	.	.	.
FvH4_5g15990	Fxa5Ag201404	.	Fxa5Cg201257	Fxa5Dg201301
FvH4_5g16450	Fxa5Ag201441	Fxa5Bg101386	Fxa5Cg201295	Fxa5Dg201333
FvH4_5g17260	Fxa5Ag201527	Fxa5Bg101475	Fxa5Cg201365	Fxa5Dg201423
.	.	.	.	Fxa5Dg201501
.	Fxa5Ag201604	.	Fxa5Cg201433	.
.	.	.	.	Fxa5Dg201502
.	.	Fxa5Bg101568	.	.
FvH4_5g18050	.	.	.	Fxa5Dg201504
.	.	Fxa5Bg101569	.	.
.	Fxa5Ag201648	.	.	.
.	.	Fxa5Bg101603	.	.
.	.	.	Fxa5Cg201505	.
.	Fxa5Ag201870	.	.	.
FvH4_5g21330	Fxa5Ag201908	Fxa5Bg101859	Fxa5Cg201740	.
FvH4_5g21780	.	Fxa5Bg101906	.	Fxa5Dg201823
.	.	.	.	Fxa5Dg201936
FvH4_5g24010	Fxa5Ag202169	Fxa5Bg102128	Fxa5Cg202002	Fxa5Dg202038
.	.	Fxa5Bg102222	.	.
FvH4_5g25740	Fxa5Ag202332	Fxa5Bg102256	Fxa5Cg202128	Fxa5Dg202181
FvH4_5g27250	Fxa5Ag202498	Fxa5Bg102410	Fxa5Cg202258	Fxa5Dg202320
.	.	Fxa5Bg102605	.	.
.	Fxa5Ag202720	.	.	.
FvH4_5g30550	Fxa5Ag202903	.	.	Fxa5Dg202646
.	.	Fxa6Bg100093	.	.
FvH4_6g01060	.	.	.	Fxa6Dg100086
FvH4_6g01061	Fxa6Ag100101	Fxa6Bg100094	.	Fxa6Dg100087
FvH4_6g02840	.	Fxa6Bg100238	Fxa6Cg100242	Fxa6DgPR4_3
.	.	.	.	Fxa6DgPR4_4
.	Fxa6AgPR4_2	.	.	.
FvH4_6g05880	Fxa6Ag100506	.	.	.
FvH4_6g08310	Fxa6Ag100713	Fxa6Bg100661	Fxa6Cg100640	.
FvH4_6g08730	Fxa6Ag100755	Fxa6Bg100705	Fxa6Cg100677	Fxa6Dg100627
.	Fxa6Ag100874	.	Fxa6Cg100764	.
FvH4_6g09961	Fxa6Ag100876	.	.	.
FvH4_6g09980	Fxa6Ag100877	Fxa6Bg100807	.	Fxa6Dg100712
.	Fxa6Ag100878	.	.	.
FvH4_6g10250	Fxa6Ag100913	Fxa6Bg100835	Fxa6Cg100792	Fxa6Dg100739
FvH4_6g13270	Fxa6Ag101251	Fxa6Bg101114	.	Fxa6Dg100995
FvH4_6g15580	Fxa6Ag101490	Fxa6Bg101324	Fxa6Cg101289	Fxa6Dg101242
FvH4_6g16950	Fxa6Ag101738	.	Fxa6Cg101468	Fxa6Dg101386
FvH4_6g18500	Fxa6Ag101798	Fxa6Bg101652	Fxa6Cg101612	Fxa6Dg101550
FvH4_6g23750	.	Fxa6Bg102113	Fxa6Cg102029	.
FvH4_6g24640	Fxa6Ag102400	.	Fxa6Cg102087	.
FvH4_6g24670	.	.	.	Fxa6Dg102067
FvH4_6g24680	.	.	Fxa6Cg102089	Fxa6Dg102069
FvH4_6g27610	Fxa6Ag102659	Fxa6Bg102428	.	Fxa6Dg102289
FvH4_6g29810	Fxa6Ag102875	Fxa6Bg102633	Fxa6Cg102532	Fxa6Dg102489
FvH4_6g31750	Fxa6Ag103059	Fxa6Bg102824	Fxa6Cg102715	Fxa6Dg102668
.	.	.	.	Fxa6Dg102872
FvH4_6g34740	.	Fxa6Bg103087	Fxa6Cg102975	Fxa6Dg102898
FvH4_6g35010	Fxa6Ag103376	Fxa6Bg103104	Fxa6Cg103000	Fxa6Dg102912
FvH4_6g35680	Fxa6Ag103445	Fxa6Bg103183	Fxa6Cg103065	Fxa6Dg102977
.	Fxa6Ag103518	.	.	Fxa6Dg103052
FvH4_6g37200	Fxa6Ag103580	.	Fxa6Cg103192	Fxa6Dg103105
FvH4_6g37201	Fxa6Ag103581	.	Fxa6Cg103193	Fxa6Dg103104
.	.	.	Fxa6Cg103195	.
FvH4_6g38280	Fxa6Ag103678	Fxa6BgPR17_5	Fxa6CgPR17_6	Fxa6Dg103180
FvH4_6g40300	Fxa6Ag103878	Fxa6Bg103533	Fxa6Cg103438	Fxa6Dg103343
.	Fxa6Ag103931	.	.	.
FvH4_6g42190	Fxa6Ag104039	Fxa6Bg103698	Fxa6Cg103590	Fxa6Dg103492
FvH4_6g43490	Fxa6Ag104140	.	.	.
FvH4_6g43500	Fxa6Ag104141	.	Fxa6Cg103689	Fxa6Dg103588
.	.	.	Fxa6CgPR7_13	.
FvH4_6g49590	Fxa6Ag104718	Fxa6Bg104290	Fxa6Cg104196	Fxa6Dg104105
FvH4_6g50150	Fxa6Ag104769	Fxa6Bg104329	.	.
.	Fxa6Ag104770	.	Fxa6Cg104237	Fxa6Dg104145
.	.	Fxa6Bg104330	.	.
FvH4_6g53680	Fxa6Ag105088	Fxa6Bg104583	Fxa6Cg104529	Fxa6Dg104405
.	.	Fxa7Bg200101	.	.
FvH4_7g02830	Fxa7Ag200320	Fxa7Bg200318	.	Fxa7Dg100249
FvH4_7g02840	.	Fxa7Bg200320	.	Fxa7Dg100250
FvH4_7g03000	.	Fxa7Bg200341	.	.
FvH4_7g04630	Fxa7Ag200484	Fxa7Bg200529	.	Fxa7Dg100414
.	Fxa7Ag200485	Fxa7Bg200531	.	Fxa7Dg100415
.	Fxa7Ag200587	Fxa7Bg200625	Fxa7Cg100522	Fxa7Dg100507
FvH4_7g08383	Fxa7Ag200889	Fxa7Bg200908	Fxa7Cg100782	Fxa7Dg100761
FvH4_7g08390	Fxa7Ag200896	Fxa7Bg200911	.	.
.	.	.	Fxa7CgPR7_19	.
FvH4_7g08400	Fxa7Ag200897	Fxa7Bg200912	.	.
.	.	.	Fxa7Cg100799	.
.	Fxa7Ag200910	.	.	.
.	.	Fxa7Bg200977	.	.
FvH4_7g10020	Fxa7Ag201063	Fxa7Bg201074	Fxa7CgPR14_1	Fxa7DgPR14_2
FvH4_7g12740	Fxa7Ag201316	Fxa7Bg201339	Fxa7Cg101221	Fxa7Dg101138
.	.	.	Fxa7CgPR8_2	.
FvH4_7g15560	.	.	Fxa7Cg101478	.
.	.	.	.	Fxa7Dg101358
FvH4_7g15680	Fxa7Ag201591	.	Fxa7Cg101491	.
.	.	.	.	Fxa7Dg101366
FvH4_7g16320	Fxa7Ag201666	Fxa7Bg201665	Fxa7Cg101571	Fxa7Dg101433
FvH4_7g18050	Fxa7Ag201829	.	.	Fxa7Dg101597
.	.	.	.	Fxa7Dg101792
FvH4_7g22480	Fxa7Ag202220	Fxa7Bg202124	Fxa7Cg102079	Fxa7Dg101925
FvH4_7g22494	Fxa7Ag202223	Fxa7Bg202126	Fxa7Cg102081	.
FvH4_7g22890	Fxa7Ag202260	Fxa7Bg202168	Fxa7Cg102113	Fxa7Dg101961
.	Fxa7Ag202335	Fxa7Bg202248	.	Fxa7Dg102047
.	Fxa7Ag202338	.	.	.
FvH4_7g23920	.	.	.	Fxa7Dg102048
FvH4_7g23950	Fxa7Ag202341	.	Fxa7Cg102185	Fxa7Dg102051
.	.	Fxa7Bg202250	Fxa7CgPR7_16	.
.	.	.	Fxa7CgPR7_17	.
.	.	.	Fxa7CgPR7_18	.
.	Fxa7Ag202371	Fxa7Bg202286	Fxa7Cg102220	Fxa7Dg102086
.	.	Fxa7Bg202287	.	.
FvH4_7g24291	.	.	.	Fxa7Dg102085
FvH4_7g25550	Fxa7Ag202492	Fxa7Bg202398	Fxa7Cg102323	Fxa7Dg102201
FvH4_7g25570	.	Fxa7Bg202402	.	Fxa7Dg102204
FvH4_7g25571	Fxa7Ag202494	Fxa7Bg202403	Fxa7Cg102327	Fxa7Dg102205
.	Fxa7AgPR7_14	.	.	.
.	Fxa7AgPR7_15	.	.	.
.	.	.	Fxa7Cg102546	.
FvH4_7g28420	Fxa7Ag202790	.	Fxa7Cg102626	.
FvH4_7g28511	Fxa7Ag202800	Fxa7Bg202671	Fxa7Cg102638	Fxa7Dg102449
FvH4_7g28750	Fxa7Ag202820	Fxa7Bg202688	Fxa7Cg102657	Fxa7Dg102466
FvH4_7g28760	Fxa7Ag202821	Fxa7Bg202689	.	Fxa7Dg102467
FvH4_7g30230	Fxa7Ag202965	Fxa7Bg202832	.	Fxa7Dg102591
.	Fxa7Ag203011	.	Fxa7Cg102812	Fxa7Dg102629
FvH4_7g30780	Fxa7Ag203023	Fxa7Bg202885	Fxa7Cg102817	Fxa7Dg102638
FvH4_7g32100	Fxa7Ag203153	Fxa7Bg202988	Fxa7Cg102907	Fxa7Dg102736
FvH4_7g33010	Fxa7Ag203228	.	Fxa7Cg102969	Fxa7Dg102806
FvH4_7g33020	Fxa7Ag203229	.	Fxa7Cg102970	Fxa7Dg102807
FvH4_7g33310	Fxa7Ag203258	Fxa7Bg203081	.	Fxa7Dg102828
.	.	.	Fxa7Cg102993	.
.	.	.	Fxa6Cg102886	.
.	.	.	Fxa6Cg102887	.
.	.	.	.	Fxa1DgPR8_1
