# Supplementary material for: Pathogenesis-related proteins are evolutionarily conserved across diploid and octoploid Fragaria species
Source: Research Square preprint supplement (doi:10.21203/rs.3.rs-7264946/v1), 2025-08-27
Supplement: Supplementary file 2 [file 5959375704f763db1814b976.xlsx]

## Sheet: C. fructicola infection 24hpi
	baseMean_control	baseMean_inoc24	baseMean	p-value (adj)	resLFC
Fxa6Bg102929	36.846	324.383	480.82	1.75e-26	3.08346
Fxa7Dg102114	9330.6	1350.54	3443.6	1.09e-17	-2.72515
Fxa6Ag100672	2290.47	541.256	1147.15	1.79e-17	-2.03583
Fxa7Bg202311	11260.5	1974.4	4498.5	2.67e-16	-2.45084
Fxa7Ag201580	1017.95	194.316	399.01	4.08e-15	-2.32803
Fxa6Ag101058	3.89231	2140.07	698.563	2.02e-14	8.8224
Fxa5Cg200371	228.305	16.0469	85.7053	3.42e-14	-3.72413
Fxa5Dg201456	1112.14	211.516	446.909	6.46e-14	-2.32747
Fxa5Cg202633	1036.22	80.4646	342.745	6.95e-14	-3.58415
Fxa3Bg201798	1616.01	296.354	674.223	1.29e-13	-2.37779
Fxa7Cg102241	12064.6	2091.75	4740.38	1.79e-13	-2.45437
Fxa7Cg102670	1053.75	13.0019	280.657	4.43e-12	-6.12083
Fxa6Bg100624	3904.8	697.947	1702.7	4.43e-12	-2.40328
Fxa1Ag101167	1092.65	149.75	552.068	4.47e-12	-2.77279
Fxa3Cg101782	2223.22	660.008	1079.86	1.81e-10	-1.68963
Fxa7Ag202398	15105.8	2800.27	6041.73	2.57e-10	-2.34059
Fxa3Ag102496	2088.81	247.74	725.191	3.1e-10	-2.96027
Fxa3Bg202253	2328.84	302.895	819.113	4.56e-10	-2.83028
Fxa4Bg102623	0.319929	741.731	282.271	1.17e-09	10.4036
Fxa5Bg101516	923.124	208.574	366.908	2.39e-09	-2.05978
Fxa4Cg201611	2.33674	112.093	87.4015	2.42e-09	5.24901
Fxa3Ag103447	1293.02	294.704	546.327	3.06e-09	-2.04511
Fxa1Bg200464	2371.47	237.45	1169.94	5.8e-09	-3.17757
Fxa5Bg102804	1129.72	140.586	423.748	5.9e-09	-2.87986
Fxa5Ag201563	2096.3	446.296	839.057	6.92e-09	-2.13845
Fxa5Dg200364	247.369	20.9164	112.15	6.92e-09	-3.4076
Fxa7Bg202230	3499.76	1052.48	2095.56	1.92e-08	-1.65376
Fxa3Bg203307	1214.23	155.059	443.014	2.8e-08	-2.83423
Fxa5Ag201818	102.204	1985.77	2926.93	2.98e-08	4.07619
Fxa2Ag101744	2500	385.322	869.525	3.69e-08	-2.57099
Fxa5Ag200076	305.803	3146.87	2492.62	4.85e-08	3.2061
Fxa7Cg101390	9.82282	67.6483	117.613	5.24e-08	2.63482
Fxa7Dg102482	279.63	4.91159	74.6532	7.51e-08	-5.53286
Fxa7Bg203095	2.998	153.451	136.954	8.48e-08	5.40131
Fxa7Dg101359	295.14	65.0296	135.49	1.09e-07	-2.07576
Fxa1Dg200426	3844.72	761.775	1903.54	1.24e-07	-2.20917
Fxa4Dg102144	4.27674	464.454	164.3	1.4e-07	6.40186
Fxa5Dg202133	867.276	96.2602	309.084	1.4e-07	-3.01104
Fxa6Bg100891	77.5781	386.758	201.523	1.44e-07	2.20097
Fxa5Ag202264	769.46	67.5668	248.164	1.6e-07	-3.33328
Fxa5Ag202453	1102.96	107.037	408.61	1.83e-07	-3.1877
Fxa2Cg201673	208.588	7.82588	58.5141	2.16e-07	-4.48791
Fxa3Dg202983	2213.29	533.742	994.501	3.02e-07	-1.94703
Fxa4Dg100746	2892.55	783.052	1281.87	3.55e-07	-1.78567
Fxa4Bg103129	883.832	111.979	365.856	4.78e-07	-2.8178
Fxa3Ag103636	2906.69	287.074	1031.81	4.86e-07	-3.15677
Fxa5Cg200064	466.031	4215.57	3754.22	6.03e-07	3.00654
Fxa6Bg100956	0	155.197	44.7687	6.39e-07	10.0687
Fxa3Dg202017	1399.45	223.767	523.243	7.46e-07	-2.49871
Fxa5Cg203009	1096.12	206.165	405.093	7.46e-07	-2.2764
Fxa7Bg202710	362.684	5.80116	97.8027	7.88e-07	-0.223563
Fxa5Cg202225	533.281	61.472	208.962	8.05e-07	-2.94271
Fxa6Ag100978	938.978	2584.82	1466.55	1.13e-06	1.38532
Fxa3Bg200067	2648.51	606.222	1299.64	1.32e-06	-2.00672
Fxa6Dg102756	32.9799	359.598	235.372	1.8e-06	3.24372
Fxa1Bg200790	205.715	22.0847	60.051	1.82e-06	-3.03512
Fxa3Cg102870	31.4205	301.035	251.848	2.02e-06	3.07296
Fxa7Bg202165	214.337	69.234	139.05	2.07e-06	-1.53816
Fxa7Ag201568	808.77	189.473	395.477	2.07e-06	-1.97122
Fxa7Dg102812	2586.61	610.329	1128.73	2.07e-06	-1.96222
Fxa5Dg201704	64.2082	856.923	867.588	2.07e-06	3.51713
Fxa7Bg203106	24.6449	577.523	2170.29	3.58e-06	4.25678
Fxa6Ag102274	178.927	43.9617	93.8779	3.62e-06	-1.89994
Fxa7Ag202313	6397.98	1725.54	3729.76	4.65e-06	-1.77656
Fxa2Ag102293	7.14022	93.1123	133.396	5.39e-06	3.41952
Fxa3Ag101655	9.56286	133.138	67.1829	6.08e-06	3.53875
Fxa2Dg201509	3999.74	887.899	1716.41	6.08e-06	-2.03404
Fxa7Cg102292	69.6758	469.437	194.832	6.08e-06	2.57855
Fxa5Cg201396	873.182	168.866	325.86	6.08e-06	-2.21988
Fxa2Bg200210	0.319929	168.668	75.6751	6.08e-06	8.14644
Fxa5Dg200823	2493.85	539.663	941.87	6.4e-06	-2.06762
Fxa6Bg104273	6.19631	65.2659	41.6974	7.63e-06	3.12219
Fxa6Cg101713	4265.07	1108.25	1864.5	7.63e-06	-1.81984
Fxa1Ag102739	3294.19	474.562	1075.19	7.63e-06	-2.61258
Fxa7Ag201704	46.8668	1074.84	3127.46	7.63e-06	4.21822
Fxa1Ag101048	665.138	317.345	429.821	7.82e-06	-1.00408
Fxa2Dg202905	5425.03	2056.79	3369.79	8.1e-06	-1.31198
Fxa3Cg103253	1867.23	202.719	657.181	8.1e-06	-2.99069
Fxa5Bg100377	281.585	31.457	103.595	9.32e-06	-2.94732
Fxa5Ag202995	1795.48	219.32	710.142	9.32e-06	-2.82796
Fxa3Ag100849	548.9	146.445	242.194	9.5e-06	-1.7857
Fxa3Bg203133	1475.64	358.244	628.032	9.5e-06	-1.90974
Fxa7Dg101357	1039.04	158.288	323.684	9.8e-06	-2.53189
Fxa7Ag202850	528.952	23.9673	155.409	9.91e-06	-4.15409
Fxa2Cg203489	629.629	157.133	443.369	1.28e-05	-1.87185
Fxa2Bg202647	272.253	30.0713	91.5587	1.44e-05	-2.95823
Fxa7Dg102166	78.6072	587.568	237.992	1.59e-05	2.70817
Fxa5Cg201640	8.01864	190.065	239.632	1.82e-05	4.20995
Fxa6Cg102805	6.53764	67.2599	93.4761	1.92e-05	3.11558
Fxa1Cg100789	289.022	16.7286	82.7846	2e-05	-3.81735
Fxa3Dg200413	577.627	61.6348	510.681	2e-05	-2.99591
Fxa2Cg201255	1696.39	504.103	885.349	2.08e-05	-1.63067
Fxa5Ag200711	90.3078	392.3	274.87	2.33e-05	1.97025
Fxa5Bg100077	12.1981	206.942	258.601	2.41e-05	3.76638
Fxa4Dg100107	3.94093	44.0933	24.6938	2.41e-05	3.20539
Fxa7Cg102974	2481.55	398.429	1156.26	2.41e-05	-2.45016
Fxa6Cg100845	260.908	979.184	577.631	2.41e-05	1.77573
Fxa7Dg101958	545.031	177.68	340.996	2.41e-05	-1.50474
Fxa5Dg201814	12.6477	81.4392	50.5221	2.41e-05	2.49696
Fxa3Ag102011	1845.55	570.176	975.925	2.6e-05	-1.57709
Fxa7Dg102851	7.67051	194.005	1401.7	2.6e-05	4.29496
Fxa1Dg201051	2213.82	335.958	971.408	2.67e-05	-2.52317
Fxa5Dg200064	102.764	1158.84	1734.27	2.67e-05	3.23797
Fxa4Cg202107	10.3768	97.7062	107.403	2.67e-05	2.96996
Fxa5Ag203553	7274.5	1240.14	2565.01	2.93e-05	-2.36575
Fxa5Ag200398	41.9713	3.66571	20.6752	3.06e-05	-3.25772
Fxa7Ag201216	586.607	1539.65	826.605	3.12e-05	1.29658
Fxa3Ag100064	2070	600.005	1173.89	3.18e-05	-1.66027
Fxa2Ag103939	17.2726	164.539	270.674	3.18e-05	3.00499
Fxa1Dg201823	2.33674	87.2134	97.2466	3.18e-05	4.76239
Fxa4Ag100333	7.865	962.082	855.935	3.34e-05	6.39178
Fxa5Dg203327	149.194	350.772	324.891	3.76e-05	1.14287
Fxa3Cg102164	1523.2	211.403	554.879	3.93e-05	-2.63555
Fxa2Cg200752	2889.66	999.179	1594.46	4.15e-05	-1.42177
Fxa5Ag203138	1335.53	246.985	487.972	4.15e-05	-2.25339
Fxa4Cg200635	2888.1	811.378	1275.08	4.42e-05	-1.69834
Fxa6Dg100792	747.712	2092.2	1360.72	4.85e-05	1.38006
Fxa5Dg202273	872.269	118.346	347.274	5.54e-05	-2.66147
Fxa4Ag102728	0.639858	58.7942	31.6853	5.7e-05	5.87009
Fxa1Ag101631	457.084	195.135	277.174	5.82e-05	-1.13896
Fxa3Cg102341	397.079	131.633	190.415	5.86e-05	-1.47648
Fxa1Dg200496	465.441	114.478	208.833	5.86e-05	-1.86926
Fxa6Ag104755	6.32629	59.4548	91.6563	5.86e-05	2.94574
Fxa3Dg203567	7.11299	148.002	937.954	6.06e-05	4.018
Fxa5Dg203105	826.955	203.991	328.863	6.97e-05	-1.86214
Fxa5Ag203726	375.124	130.705	253.836	7.09e-05	-1.40636
Fxa2Bg200484	197.515	8.97505	56.2849	7.11e-05	-4.10623
Fxa1Ag100793	139.526	27.9321	65.5158	7.85e-05	-2.13993
Fxa7Cg101477	451.609	92.1937	153.691	8.29e-05	-2.10896
Fxa1Ag100710	342.296	154.022	251.969	8.38e-05	-1.06795
Fxa3Ag101410	15.2062	68.1459	36.5801	8.38e-05	1.97908
Fxa2Cg202301	15.1021	381.957	702.988	8.46e-05	4.2834
Fxa1Dg200712	410.281	51.1154	130.316	8.46e-05	-2.76551
Fxa6Dg102278	3.5565	54.9936	99.9649	8.49e-05	3.60288
Fxa2Dg200583	59.5506	2.60285	16.7358	8.64e-05	-4.17654
Fxa7Dg100070	1284.24	532.885	661.845	9.22e-05	-1.17313
Fxa7Cg101479	739.005	185.314	392.942	9.55e-05	-1.83816
Fxa4Ag100357	105.138	1100.84	803.045	9.55e-05	3.1179
Fxa1Ag101180	0	46.3683	212.994	9.55e-05	0.173768
Fxa7Ag203342	66.6253	281.18	665.032	9.55e-05	1.90778
Fxa2Dg200492	132.477	21.9698	44.1482	9.82e-05	-2.38929
Fxa2Ag103600	0	39.7448	50.6932	9.82e-05	0.286632
Fxa7Ag201556	5.70329	154.986	275.632	9.99e-05	4.3541
Fxa3Cg102465	2302.19	1103.31	1389.31	0.000105593	-0.980629
Fxa2Dg202353	0	33.2216	15.1146	0.000122837	7.51412
Fxa5Dg200423	85.9044	8.99518	50.1004	0.00012377	-2.98772
Fxa6Cg100621	95.6316	15.4641	87.8212	0.000136937	-2.40472
Fxa7Ag203234	1416.22	413.419	698.83	0.000143264	-1.63054
Fxa1Cg102438	295.82	65.7076	151.661	0.000151946	-1.98742
Fxa6Ag102599	18.4868	77.2848	95.506	0.000159446	1.86946
Fxa3Bg200120	416.731	50.3283	247.866	0.000163568	-2.79107
Fxa3Cg103065	1266.55	429.872	635.722	0.00017206	-1.43128
Fxa4Cg200182	23.6517	281.767	479.371	0.00018292	3.2702
Fxa4Cg201612	25.8627	592.962	401.935	0.000197835	4.1236
Fxa6Dg100848	0.688479	117.956	34.6024	0.000208043	6.72407
Fxa6Bg101146	20.28	184.298	174.099	0.000208232	2.89822
Fxa2Dg202380	522.912	168.392	574.168	0.000208232	-1.49955
Fxa1Ag100837	858.216	92.7245	259.684	0.00021785	-2.92566
Fxa1Ag100171	16797.4	3138.68	6089.79	0.000231833	-2.20378
Fxa3Ag101100	60.1045	292.675	393.65	0.000231833	2.08312
Fxa2Dg200243	117.439	242.335	238.439	0.000240561	0.958783
Fxa2Dg202861	4379.33	1071.27	1771.83	0.000241215	-1.85194
Fxa2Bg202036	0.319929	43.1316	11.3256	0.000241215	6.17439
Fxa5Cg200781	2358.76	566.136	946.722	0.000241215	-1.87916
Fxa6Dg102753	262.713	1026.83	1752.27	0.000243662	1.78562
Fxa6Bg100507	892.868	250.496	487.342	0.000251157	-1.67322
Fxa2Ag102357	1.69689	104.064	56.1683	0.000260709	5.34855
Fxa3Dg203121	1017.65	138.845	401.328	0.00026907	-2.61426
Fxa4Bg102509	31.3177	86.1909	71.7985	0.000301431	1.3268
Fxa3Cg100870	50.7274	164.07	177.955	0.000301431	1.54863
Fxa7Ag203275	39.1409	571.28	308.814	0.000301431	3.51725
Fxa4Ag103393	1402.47	544.863	784.835	0.000359839	-1.24515
Fxa4Cg201600	864.724	5162.57	5820.42	0.000366749	2.34509
Fxa7Ag202008	2.9766	117.787	137.705	0.000380281	4.75512
Fxa4Ag101896	13.5952	211.897	117.005	0.000393922	3.59695
Fxa3Ag100334	101.587	23.672	64.4133	0.000444763	-1.89804
Fxa3Dg201723	1180.01	405.709	628.224	0.000471423	-1.40062
Fxa1Dg200720	2.80254	121.158	248.642	0.000471423	0.141865
Fxa6Ag100807	16.6373	110.367	188.134	0.000487912	2.47108
Fxa2Ag102825	324.615	74.6564	140.464	0.000494849	-1.91921
Fxa2Ag102771	1414.95	445.349	1192.71	0.000531934	-1.5125
Fxa6Bg103404	474.739	141.906	265.33	0.000537207	-1.58182
Fxa6Cg102002	67.8473	12.3868	32.7697	0.000537207	-2.21945
Fxa2Bg202131	11.1016	101.316	96.2497	0.00055237	2.86874
Fxa6Cg100389	0.688479	53.3304	63.7322	0.00055237	5.61013
Fxa5Ag201817	12.7894	367.227	210.241	0.000552924	4.35922
Fxa6Ag100928	6.02225	77.3295	105.065	0.000566557	3.3026
Fxa6Cg101006	109.297	437.513	621.878	0.000571586	1.80821
Fxa4Dg101460	120.671	2554.93	1064.57	0.000582362	3.97998
Fxa1Cg101146	406.673	2336.15	2630.96	0.0006087	2.28107
Fxa2Bg201221	346.799	156.004	173.118	0.0006087	-1.04924
Fxa6Ag101493	13.3411	93.4308	96.4522	0.000612141	2.51424
Fxa5Cg200770	19.6729	296.595	732.647	0.000617326	3.52631
Fxa4Ag101875	1402.42	460.033	721.769	0.00062934	-1.45681
Fxa4Dg101455	669.423	5188.73	4307.31	0.000672734	2.66851
Fxa3Ag101815	656.167	157.415	273.798	0.000677545	-1.85815
Fxa2Dg202230	72.4456	3.62742	25.5886	0.000694776	-3.8747
Fxa3Dg201547	363.184	85.4789	165.409	0.000695656	-1.88316
Fxa4Cg200551	2723.6	624.773	1119.76	0.000695656	-1.92256
Fxa3Cg101929	9.44293	49.8244	91.5514	0.000708122	2.17284
Fxa5Bg103309	3506.18	719.793	1325.25	0.000745703	-2.05731
Fxa1Bg200442	46.9569	230.994	229.724	0.000751933	2.07054
Fxa3Bg202738	4.97073	75.9344	240.119	0.000781934	3.53809
Fxa1Ag100448	123.441	613.611	678.062	0.000781934	2.08336
Fxa4Cg200230	62.7605	396.072	188.77	0.000781934	2.39662
Fxa7Ag200002	128.699	15.0802	59.8998	0.000787036	-2.78703
Fxa4Ag100213	6.67896	63.4787	127.116	0.000810519	2.89157
Fxa6Ag100540	1742.93	536.102	1135.18	0.000857975	-1.53516
Fxa7Dg102025	2854.07	1261.16	2100.25	0.000891562	-1.07038
Fxa7Cg102163	1473.66	381.003	926.371	0.000940983	-1.75587
Fxa5Dg201850	5128.44	1419.29	2395.65	0.00102414	-1.66971
Fxa6Ag104737	765.122	161.44	340.562	0.00102866	-2.01544
Fxa6Dg100682	20.5241	70.5837	90.6195	0.00106889	1.58202
Fxa2Cg203052	170.903	1011.93	374.302	0.00107133	2.3061
Fxa2Bg201935	113.016	22.2712	59.215	0.00107599	-2.09257
Fxa1Dg200455	825.745	436.385	594.336	0.00115225	-0.836665
Fxa2Dg201980	19.0061	198.012	271.318	0.00117492	3.01065
Fxa7Dg101018	1.45832	34.717	403.25	0.00117692	4.07384
Fxa1Ag100311	185.671	29.1537	109.509	0.00121621	-2.39055
Fxa1Bg201464	1112.38	2240.57	1560.12	0.00122424	0.917404
Fxa4Dg101432	182.768	24.433	101.305	0.00125277	-2.59526
Fxa3Cg102655	5.02486	113.462	421.855	0.00126824	0.174143
Fxa5Ag201435	314.452	601.458	643.78	0.001274	0.846274
Fxa1Cg102893	1447.68	263.586	515.541	0.00141814	-2.19283
Fxa6Dg100480	7200.47	2868.95	4691.35	0.00145759	-1.19227
Fxa3Dg200306	44.0098	300.003	429.833	0.00149533	2.46741
Fxa4Dg101511	18.7076	169.227	86.8163	0.00150671	2.82524
Fxa3Ag100457	364.587	76.2304	136.504	0.00152022	-2.01518
Fxa6Cg102338	0	18.7287	31.5975	0.00152245	6.42673
Fxa2Ag103320	6135.26	2348.2	3434.82	0.00153261	-1.24213
Fxa5Bg100639	34.857	8.38998	26.1392	0.00157363	-1.83155
Fxa3Bg203808	389.459	1068.7	1305.56	0.00157954	1.30608
Fxa3Dg203658	70.2191	240.005	193.078	0.00161045	1.58021
Fxa4Bg100345	3150.71	9222.87	4978.31	0.00161064	1.38948
Fxa2Ag102001	0	20.394	29.5792	0.00161064	0.196557
Fxa3Cg100061	2852.49	811.05	1740.26	0.00176244	-1.62125
Fxa3Ag104261	20.0311	116.138	137.309	0.00176436	2.25384
Fxa3Bg200259	279.882	86.7246	129.015	0.00177898	-1.50489
Fxa6Ag100408	0	20.5585	36.4427	0.00179094	0.182464
Fxa1Dg200658	9.42705	68.5364	405.743	0.00179758	2.5496
Fxa3Ag100476	1866.88	206.311	1566.42	0.00179758	-2.82093
Fxa4Cg201621	198.69	49.374	84.1086	0.00182172	-1.78547
Fxa6Cg101777	5.28515	39.8118	80.4517	0.00183489	2.55458
Fxa2Bg203109	3609.84	1434.66	2035.03	0.00188728	-1.18722
Fxa2Ag100470	45.4678	263.281	180.702	0.00189472	2.26112
Fxa3Ag103203	3168.56	912.686	1477.47	0.00190467	-1.59669
Fxa7Cg101897	3.66508	85.4002	85.9086	0.0019249	3.98358
Fxa2Dg201483	115.133	380.703	222.079	0.00193949	1.54042
Fxa3Dg200061	2522.07	781.794	1440.46	0.00194717	-1.51341
Fxa2Cg200311	226.026	76.5407	130.043	0.00199183	-1.3905
Fxa1Ag101305	69.9222	339.94	341.096	0.00199183	2.02987
Fxa3Ag102217	1.45832	111.574	41.9006	0.00203656	5.53304
Fxa2Cg203217	482.604	208.268	255.895	0.00212247	-1.08202
Fxa3Ag102812	36.8949	343.85	1329.07	0.00212443	2.85017
Fxa4Ag102243	142.362	41.8497	99.6728	0.00212443	-1.56834
Fxa2Dg200528	740.306	307.837	493.471	0.00212443	-1.1298
Fxa5Bg100369	2721.97	718.148	1128.53	0.00212443	-1.70457
Fxa7Bg201584	874.627	210.713	294.489	0.00212837	-1.80841
Fxa6Ag104069	17.2389	67.7953	150.799	0.0021588	1.73594
Fxa1Bg200495	5.302	39.0761	31.1682	0.00218543	2.52209
Fxa4Cg202184	1011.64	230.832	463.047	0.00226514	-1.89074
Fxa6Ag101328	595.385	273.089	342.341	0.00228333	-1.00521
Fxa6Cg104557	367.675	1487.17	697.763	0.00233445	1.78827
Fxa1Cg102960	16.3977	73.6084	70.2974	0.0023898	1.92428
Fxa6Ag100555	1.66966	27.1313	12.9168	0.00240488	3.68284
Fxa4Bg102936	901.9	240.272	432.669	0.00254829	-1.68974
Fxa3Cg100794	5.39471	42.852	114.225	0.00255702	2.58428
Fxa6Dg102311	9.72007	64.3533	56.2256	0.00255741	2.3804
Fxa4Cg201900	0.7371	33.2901	95.8338	0.00258529	4.86494
Fxa4Ag101967	443.122	2300.62	1781.96	0.00270087	2.10163
Fxa2Ag102418	599.49	193.681	314.044	0.00270087	-1.44417
Fxa3Cg101181	37.3017	168.95	125.247	0.00270087	1.923
Fxa1Cg100757	23.6803	1.86413	9.45016	0.00270087	-3.26099
Fxa2Ag102359	66.7063	2688.32	7069.75	0.00272889	4.67746
Fxa1Bg200239	1065.55	349.029	497.935	0.00276806	-1.42543
Fxa4Cg202694	1437.71	470.841	770.733	0.00280222	-1.42589
Fxa5Ag200120	832.015	4190.99	2362.28	0.00280222	2.06263
Fxa6Dg100939	14.3404	119.159	156.507	0.00280222	2.66736
Fxa2Ag102819	4129.46	1683.87	2365.93	0.00280606	-1.15162
Fxa3Cg102946	34.3215	94.1265	61.0666	0.00290373	1.27853
Fxa7Bg202539	3825.11	1801.72	2035.71	0.00290373	-0.969024
Fxa6Dg101935	180.795	28.9485	71.2017	0.00292009	-2.33167
Fxa1Cg100650	0	15.7904	9.36499	0.00294703	6.14291
Fxa1Dg200439	15.4457	179.128	308.219	0.00294767	3.10541
Fxa2Ag101656	2350.76	987.077	1855.44	0.00302945	-1.11192
Fxa6Bg100897	404.58	118.349	263.133	0.00302945	-1.56909
Fxa2Ag100147	1703.05	3090.7	1732.5	0.00310459	0.771683
Fxa5Ag201976	4448.4	1140.19	2028.22	0.00313705	-1.73067
Fxa7Bg203068	716.772	310.683	408.12	0.00313705	-1.07162
Fxa4Cg202538	262.327	505.923	360.769	0.0031769	0.849405
Fxa1Bg200603	71.4333	216.166	199.338	0.0031769	1.40836
Fxa6Bg102711	1281.6	510.796	575.126	0.00318134	-1.17414
Fxa3Dg200915	43.9884	138.183	137.176	0.00319291	1.44714
Fxa7Dg100910	0.319929	41.4355	64.8274	0.00320696	0.135991
Fxa5Cg202100	99.7008	257.972	379.857	0.00320907	1.21021
Fxa6Bg103454	2.17954	37.7301	64.0312	0.0032157	3.60207
Fxa6Dg100562	109.785	19.0892	96.4255	0.00322253	-2.21298
Fxa7Ag202563	494.99	1812.1	1448.35	0.00323097	1.6495
Fxa1Bg202035	2.80805	37.8465	41.4561	0.00324535	3.35065
Fxa6Dg103564	8.11005	207.889	180.55	0.00327896	4.09563
Fxa3Ag100888	12.2568	68.2145	143.026	0.00329338	2.16299
Fxa2Cg201273	6.31592	34.1669	133.963	0.0033044	2.14192
Fxa5Bg100315	207.132	64.4313	105.794	0.00331947	-1.48999
Fxa6Bg101859	13.9164	72.3801	89.6718	0.00338688	2.06559
Fxa2Ag100586	113.888	10.1714	33.5061	0.00338688	-3.05291
Fxa6Ag100429	227.42	559.297	413.556	0.00342656	1.15201
Fxa6Dg104159	5.87638	72.5178	64.6383	0.0034536	3.15126
Fxa6Bg101706	2932.49	769.211	1437.31	0.00355813	-1.69643
Fxa1Ag101505	12.2182	48.4054	25.1967	0.00360845	1.75592
Fxa1Ag100492	19.5267	203.761	426.149	0.00369543	2.9705
Fxa7Cg102106	299.432	127.578	223.773	0.0037052	-1.09103
Fxa5Ag201319	66.9747	170.398	117.315	0.00381846	1.18696
Fxa5Cg201806	4308.1	1316.39	2013.49	0.00382338	-1.49866
Fxa6Bg102757	8.12042	66.4908	105.896	0.00382611	2.63474
Fxa5Ag202309	3.20383	30.9336	17.93	0.00382611	2.84002
Fxa5Cg203220	316.556	732.462	698.766	0.00384238	1.07011
Fxa1Ag100970	40.8977	151.08	268.966	0.00384238	1.64718
Fxa1Ag102468	442.4	155.113	244.256	0.00385234	-1.32997
Fxa6Ag101886	4.48354	59.8025	45.0188	0.00386498	3.23959
Fxa6Cg104252	2.33674	43.3849	49.7873	0.00387513	3.62498
Fxa7Cg101466	1144.01	391.758	580.285	0.003954	-1.36125
Fxa5Ag200390	3207.4	748.006	1303.61	0.003954	-1.83892
Fxa7Bg202678	6.85756	42.3663	29.6462	0.003954	2.28895
Fxa5Dg202159	423.244	224.482	276.716	0.003954	-0.812431
Fxa6Ag100013	0.959787	41.3048	82.2841	0.003954	0.183124
Fxa7Bg200278	5.75094	38.4215	25.5606	0.00396748	2.37787
Fxa5Cg203228	36.1257	92.8615	60.7496	0.00412771	1.19718
Fxa2Bg203409	373.269	131.711	222.96	0.00416841	-1.32005
Fxa5Bg100293	246.043	51.6886	106.028	0.00426679	-1.96936
Fxa6Dg104351	222.903	789.404	1043.81	0.0043121	1.59931
Fxa5Ag200885	38.4109	501.83	829.878	0.00446359	3.23047
Fxa4Dg102482	3305.77	1132.66	1905.81	0.0045061	-1.36257
Fxa6Ag102040	34.5659	133.592	171.912	0.00459435	1.69451
Fxa5Dg200736	4114.73	2415.45	2955.57	0.00468421	-0.686723
Fxa7Dg100621	2.2395	30.9571	37.069	0.00474685	3.2024
Fxa7Cg101550	2637.36	781.27	1795.01	0.00475661	-1.53389
Fxa3Dg203012	30.9158	118.023	76.4583	0.00488688	1.67703
Fxa2Ag103687	643.077	332.242	318.283	0.00498075	-0.842318
Fxa1Bg201160	273.43	508.404	582.169	0.0050842	0.794708
Fxa6Ag101445	131.285	391.442	295.919	0.00522277	1.37812
Fxa2Bg202642	1112.57	451.747	693.75	0.0053233	-1.14081
Fxa6Ag100437	393.939	81.4333	165.182	0.00538368	-1.97748
Fxa1Cg101363	6.29355	54.3574	42.8064	0.00556158	2.67611
Fxa6Cg102897	0	26.0169	16.8389	0.00563112	0.0867509
Fxa6Cg101294	15.8733	76.8942	58.8295	0.00563112	1.96504
Fxa6Ag105015	135.817	547.509	923.452	0.00573073	1.74972
Fxa3Ag102019	18.0369	111.96	132.445	0.00576894	2.27453
Fxa2Dg200586	37.8599	0.930662	10.8481	0.00596825	-0.137363
Fxa6Cg100199	28.1823	133.854	374.383	0.00603039	1.94356
Fxa5Ag200339	13.0166	111.837	316.047	0.00606029	2.66721
Fxa1Cg100797	1134.49	378.725	469.021	0.00612966	-1.37663
Fxa2Bg202234	1.96819	35.1241	366.024	0.00617551	3.51886
Fxa4Ag101906	111.545	29.0538	50.2042	0.0062138	-1.68389
Fxa3Dg202547	1204.75	516.425	634.004	0.00624657	-1.06816
Fxa6Ag100906	1.10565	31.203	40.5533	0.00628947	4.17153
Fxa1Cg100521	681.017	205.662	325.98	0.00628947	-1.50136
Fxa1Bg200907	9.64876	51.9541	170.492	0.00641537	2.10189
Fxa4Cg202747	30.7015	120.348	170.56	0.00653149	1.70454
Fxa7Dg101346	1064.39	422.562	637.49	0.00653366	-1.16253
Fxa7Cg101536	10438.3	2403.62	4946.06	0.00653366	-1.83346
Fxa5Ag200154	7.59466	37.7818	15.8908	0.00656485	1.99259
Fxa5Bg102351	594.852	264.424	422.742	0.00656485	-1.02365
Fxa4Cg202403	3.33381	35.5277	16.9446	0.00656485	2.95393
Fxa3Cg100344	604.389	117.14	309.582	0.00656485	-2.04745
Fxa2Bg202143	184.658	1134.35	418.234	0.00662081	2.27041
Fxa6Ag101000	1408.59	483.714	710.869	0.00662823	-1.34207
Fxa7Bg201755	522.903	285.458	373.377	0.00683034	-0.768937
Fxa5Dg200048	41.5344	192.931	161.28	0.00697149	1.90859
Fxa3Dg202785	1867.51	557.801	897.225	0.00697582	-1.51098
Fxa3Dg203160	2.72669	33.4497	23.5649	0.00697582	3.157
Fxa6Bg101718	4346.31	2416.31	2726.67	0.00699401	-0.749243
Fxa6Cg102625	445.05	80.4633	149.866	0.00700072	-2.12771
Fxa7Bg202361	168.976	574.167	311.114	0.00709313	1.52975
Fxa1Dg200621	2262.01	423.766	798.805	0.00731509	-2.0777
Fxa7Bg202473	29.9501	141.748	128.456	0.00734893	1.93406
Fxa3Ag103849	2.01682	61.0997	168.353	0.00750669	0.120091
Fxa1Cg100414	3.31793	37.406	31.92	0.00751251	3.00783
Fxa3Cg101180	177.134	830.622	1779.98	0.00753645	1.92406
Fxa1Ag100186	229.042	833.437	472.236	0.00764309	1.61034
Fxa3Bg203614	58.478	12.9649	27.9389	0.00797786	-1.86848
Fxa7Dg102533	132.84	21.6174	80.6264	0.00802412	-2.24625
Fxa1Dg200149	1800.01	649.096	1013.45	0.00806138	-1.27367
Fxa2Cg203325	113.883	33.1034	56.5669	0.00806138	-1.53743
Fxa7Bg200076	473.012	191.52	277.139	0.00812947	-1.13059
Fxa1Dg200923	535.563	321.671	405.871	0.00813842	-0.65272
Fxa6Bg104583	6.66308	34.039	53.3543	0.0081455	1.9909
Fxa6Cg103130	60.5745	594.387	557.737	0.00818459	2.82578
Fxa1Dg201012	175.326	52.9	77.6611	0.00854443	-1.48932
Fxa5Dg203283	528.944	187.5	397.164	0.00855458	-1.29692
Fxa3Cg102179	6.39728	44.7813	64.3033	0.00855458	2.42123
Fxa3Cg101955	610.8	113.611	282.656	0.00866326	-2.08065
Fxa1Cg100456	1.91957	115.632	120.465	0.00866326	0.0710046
Fxa7Cg101110	211.306	585.822	309.634	0.00866326	1.27413
Fxa5Cg201586	423.685	145.829	185.146	0.00866326	-1.32767
Fxa4Bg101053	87.8136	379.173	423.77	0.00873647	1.81937
Fxa1Ag100449	153.029	911.647	2375.83	0.00873647	2.20754
Fxa5Bg100057	8.78848	60.7587	48.4703	0.00878571	2.36342
Fxa3Bg201096	190.374	388.642	296.572	0.00878571	0.899288
Fxa3Cg100106	767.175	117.781	630.714	0.00878571	-2.31294
Fxa1Dg200548	100.327	309.711	294.043	0.00878571	1.40492
Fxa4Bg102809	3.09524	19.8984	13.2993	0.00892659	2.35569
Fxa6Ag103992	0	38.2595	11.8437	0.00893312	7.30099
Fxa5Cg202370	9.83417	47.3456	59.8982	0.00903008	1.91922
Fxa5Cg200661	1463.68	911.583	964.112	0.0090423	-0.604583
Fxa5Dg201216	23.7765	80.7186	41.7946	0.0090423	1.5095
Fxa1Ag100252	2571.37	985.625	1402.55	0.00921021	-1.19425
Fxa2Ag100265	478.123	186.494	254.416	0.00924404	-1.17201
Fxa4Ag102475	1129.41	3233.94	1943.14	0.00951895	1.30421
Fxa7Ag201912	179.96	340.539	184.181	0.00957114	0.800861
Fxa1Ag102152	11.0312	80.7386	97.2839	0.00969078	2.46275
Fxa5Bg102356	174.732	34.883	91.6794	0.00973067	-1.98889
Fxa6Cg100403	563.385	115.907	247.103	0.00973479	-1.95188
Fxa3Ag100659	30.1521	80.3159	54.0129	0.00973479	1.22043
Fxa1Ag100879	73.1827	29.3298	53.7775	0.00979295	-1.13485
Fxa1Ag100845	2214.37	877.982	999.586	0.00979295	-1.15697
Fxa6Dg101666	4281.7	2445.98	2849.18	0.00993134	-0.710028
Fxa3Ag102866	600.232	2424.38	914.048	0.00996112	1.7321
Fxa2Dg201908	36.8777	109.731	141.339	0.0100637	1.34984
Fxa4Dg101209	619.169	320.908	434.475	0.0102788	-0.826211
Fxa3Bg200350	0.688479	29.2892	40.6135	0.0103665	0.215989
Fxa5Ag200483	262.223	471.698	275.36	0.0103665	0.741789
Fxa6Ag104283	60.3214	129.55	93.0314	0.0103946	0.949654
Fxa5Cg201455	2.19542	24.9093	9.09698	0.0104191	2.99409
Fxa2Ag102008	0	16.373	32.2906	0.0104276	0.105342
Fxa1Cg100213	1459.86	494.126	716.721	0.0104897	-1.33486
Fxa2Dg203036	76.6063	10.4059	31.8489	0.0104897	-2.44421
Fxa6Ag101361	2111.74	440.586	778.597	0.0106503	-1.93366
Fxa5Ag200313	1997.7	585.853	1151.69	0.0107346	-1.51246
Fxa4Dg102701	507.467	84.6705	269.326	0.0107995	-2.19765
Fxa5Ag202186	10.6799	125.571	217.195	0.0108044	3.01
Fxa5Bg103470	282.444	136.63	191.03	0.0108492	-0.903695
Fxa3Bg201280	219.378	798.743	887.95	0.0109967	1.59311
Fxa3Cg102939	261.007	1333.03	1521.27	0.0110313	2.00724
Fxa5Bg100329	16.1118	123.445	350.544	0.0111368	2.48481
Fxa2Ag103944	153.904	20.1296	62.8102	0.0111368	-2.48958
Fxa6Bg104422	370.602	92.5073	256.353	0.0111888	-1.70622
Fxa7Ag201101	2.75392	49.6616	100.312	0.0111888	0.159227
Fxa5Ag202279	170.68	375.971	245.477	0.0111888	0.983932
Fxa2Bg200496	172.538	774.604	1123	0.011209	1.84719
Fxa3Dg201139	0.319929	13.8582	90.9883	0.0112361	4.32157
Fxa3Bg201850	670.313	405.684	390.664	0.0112431	-0.63484
Fxa3Cg101550	323.208	173.919	170.609	0.0113303	-0.775408
Fxa6Bg104216	19.3743	90.6509	47.5394	0.0113303	1.8808
Fxa3Ag103279	70.1824	13.8414	44.1623	0.011349	-1.99598
Fxa6Cg102531	64.1897	291.33	326.465	0.0113855	1.8557
Fxa2Cg201964	1301.14	620.173	947.868	0.0119131	-0.922156
Fxa4Dg102590	230.285	65.6392	149.7	0.0120891	-1.54456
Fxa6Ag100254	1195.81	599.419	750.588	0.0120891	-0.862217
Fxa6Cg101350	2223.23	1160.04	1364.67	0.0121523	-0.812879
Fxa5Dg200654	71.7873	185.21	137.518	0.0121544	1.16946
Fxa3Cg101459	2.65667	39.8778	19.3381	0.0121683	3.2652
Fxa2Dg203303	49.1757	12.8416	26.9946	0.012291	-1.645
Fxa6Bg104614	154.992	503.132	260.133	0.0123047	1.45168
Fxa5Ag202939	31.1158	204.676	189.2	0.0123188	2.30159
Fxa7Ag200896	0.7371	40.5836	34.6944	0.0126122	0.111203
Fxa3Cg101788	2236.16	4040.16	4573.06	0.0127744	0.746607
Fxa7Cg101097	1.00841	27.0814	104.911	0.0127744	0.216041
Fxa2Cg200798	4398.19	1164.7	2117.51	0.0129081	-1.62672
Fxa7Bg200381	1878.46	497.315	888.271	0.0130477	-1.6267
Fxa4Cg202973	140.718	67.6935	79.769	0.0130542	-0.905433
Fxa2Cg203013	0	11.112	4.38399	0.0130542	5.45436
Fxa2Bg203072	4289.36	1261.21	2085.03	0.0130681	-1.49973
Fxa5Dg202050	2.75392	46.5043	64.7801	0.0132161	0.16331
Fxa7Cg101605	823.797	171.597	341.042	0.0132161	-1.91442
Fxa1Cg101208	235.6	433.291	425.819	0.0133421	0.763113
Fxa7Bg202291	3431.07	1808.78	1762.72	0.0134118	-0.799451
Fxa6Dg100803	311.643	106.776	174.284	0.0134159	-1.3145
Fxa5Cg200288	7229.78	1995.09	3893.97	0.013445	-1.56425
Fxa4Dg101994	219.928	99.1447	134.751	0.0137051	-0.981636
Fxa6Bg101053	246.722	577.854	913.62	0.0137051	1.05063
Fxa2Cg203488	135.498	327.47	232.962	0.0137322	1.0871
Fxa6Cg103020	8.91846	52.6932	38.4497	0.0138743	2.14087
Fxa5Dg200441	490.041	225.719	367.098	0.0138743	-0.960173
Fxa2Ag100640	1366.68	597.47	844.302	0.0139327	-1.02107
Fxa2Cg202536	367.502	126.653	193.478	0.0139327	-1.30478
Fxa7Ag200698	6.19631	47.4254	43.6711	0.0139582	2.44674
Fxa4Dg101466	524.336	158.216	228.188	0.0140734	-1.4633
Fxa5Bg102903	64.4156	573.288	644.18	0.0142141	2.65426
Fxa6Ag100808	1.91957	24.8337	30.7761	0.0145119	3.02177
Fxa1Dg200875	392.363	902.472	611.324	0.0146741	1.02981
Fxa5Ag202435	1043.58	368.646	499.16	0.0147025	-1.27434
Fxa1Ag100471	2169.78	840.649	1487.36	0.0148505	-1.16225
Fxa5Bg101969	854.157	489.427	699.367	0.0148666	-0.697228
Fxa4Dg102648	456.921	143.275	421.545	0.0149826	-1.41843
Fxa3Dg200016	3.21971	18.9024	18.993	0.015126	2.13234
Fxa1Cg102867	260.189	114.011	131.502	0.0151553	-1.01532
Fxa2Bg202179	485.738	1126.14	604.316	0.0151553	1.03722
Fxa2Cg201681	62.9271	366.034	415.16	0.0151638	2.13514
Fxa5Dg202211	154.793	604.578	621.913	0.0151638	1.66312
Fxa5Dg202353	197.613	637.369	2148.2	0.0151638	1.43105
Fxa2Cg201612	201.467	57.9613	80.8651	0.0152261	-1.52012
Fxa6Cg101819	1.05703	22.5139	49.3893	0.0155533	3.69159
Fxa4Ag102889	115.559	306.325	1856.72	0.0157206	1.19332
Fxa6Bg104306	646.513	132.921	283.183	0.0158215	-1.91922
Fxa1Cg100417	111.433	492.8	1706.24	0.0158242	1.80495
Fxa4Dg101765	112.99	28.7064	75.4393	0.0158382	-1.66298
Fxa6Bg103365	0	21.9775	9.41726	0.0158536	0.0704813
Fxa4Dg101582	527.58	268.875	431.277	0.0158536	-0.833244
Fxa3Dg200227	336.422	1343.33	1690.22	0.0158622	1.68508
Fxa3Bg200448	795.554	164.887	610.858	0.0159007	-1.90881
Fxa1Cg100009	26.6646	81.5047	66.8336	0.0161564	1.37075
Fxa6Dg100198	4.22812	29.1164	17.8498	0.0163703	2.30953
Fxa1Cg102448	221.304	53.3268	112.271	0.016392	-1.7279
Fxa4Dg102787	862.905	408.112	523.163	0.016392	-0.922417
Fxa4Ag101872	240.482	1400.04	1134.1	0.016392	2.13526
Fxa3Cg103000	28.2769	70.9332	55.2949	0.0164145	1.10888
Fxa5Ag202426	455.214	262.618	265.173	0.0165941	-0.685806
Fxa1Dg200625	193.467	84.4921	154.53	0.0166497	-1.01515
Fxa3Ag102191	0	14.1991	41.0559	0.0167809	0.0984356
Fxa2Dg200405	340.665	81.6407	210.582	0.0167809	-1.72914
Fxa3Cg102882	976.633	222.527	359.75	0.0167809	-1.78849
Fxa1Cg101011	1.37696	21.4828	13.3276	0.0170083	3.28638
Fxa1Bg201091	474.758	106.066	207.796	0.0171949	-1.81025
Fxa7Ag200808	39.4793	149.296	116.599	0.0171949	1.60933
Fxa3Ag101548	186.54	43.3991	122.925	0.0171949	-1.76777
Fxa2Cg202407	64.977	13.9675	47.1505	0.0171949	-1.85641
Fxa6Cg100015	112.051	349.155	194.018	0.0173315	1.38318
Fxa4Cg201757	27.497	221.696	299.436	0.0174255	2.50777
Fxa6Cg100464	689.952	429.928	482.099	0.0176536	-0.593358
Fxa1Dg201443	2305.81	3847.23	2689.83	0.0178557	0.64225
Fxa6Dg102565	856.96	328.286	383.397	0.0179051	-1.16773
Fxa5Dg203196	120.972	596.997	433.157	0.0179264	1.93521
Fxa2Bg202144	179.66	403.224	214.77	0.0179523	0.989593
Fxa1Bg200655	25.5561	202.656	161.309	0.0179523	2.48468
Fxa4Bg102178	27.3414	216.516	661.937	0.0179523	2.48255
Fxa3Cg100030	12.4208	67.6843	48.7107	0.0179523	2.01735
Fxa2Bg202687	91.8021	34.4805	70.0595	0.0180772	-1.19172
Fxa1Cg101340	248.075	878.339	1338.17	0.0180772	1.53233
Fxa2Bg200191	492.638	206.284	285.4	0.0181456	-1.06207
Fxa1Bg201675	293.675	143.403	197.813	0.0181754	-0.877489
Fxa5Cg201454	22.9633	67.0829	33.0552	0.0182099	1.31412
Fxa1Dg201222	1458.82	4482.17	7221.11	0.0182516	1.36211
Fxa6Bg101192	606.269	296.977	425.941	0.0185234	-0.876947
Fxa2Ag102340	560.849	1194.93	668.172	0.0185708	0.928673
Fxa5Dg202113	0.688479	15.4355	8.59814	0.0186303	3.74554
Fxa3Bg200673	185.015	71.8773	98.664	0.0187271	-1.14741
Fxa1Cg101434	42.7272	140.808	110.619	0.0187271	1.43741
Fxa3Bg203835	4.35356	46.1881	37.0545	0.0187674	2.80015
Fxa4Bg101833	817.318	9810.89	5914.48	0.0187888	2.9863
Fxa5Bg103286	80.1952	280.165	551.571	0.0188877	1.50657
Fxa1Dg200004	1.32834	28.6538	19.5265	0.0189298	3.6322
Fxa5Ag200655	1345.44	697.152	830.383	0.0190702	-0.808992
Fxa1Bg202777	161.87	41.6644	94.9902	0.0190717	-1.63392
Fxa2Bg202078	3201.96	1611.4	2072.24	0.0191276	-0.843863
Fxa5Cg202071	379.166	74.8009	154.137	0.0191276	-1.94841
Fxa2Ag103704	274.602	88.0534	421.998	0.0191276	-1.37684
Fxa3Cg103364	2.56397	22.7716	11.1669	0.0191276	2.62884
Fxa3Cg103521	43.6851	130.819	135.779	0.0191276	1.34581
Fxa3Cg100868	11.92	67.4608	77.2639	0.0191276	2.07309
Fxa5Cg202921	917.442	237.16	346.445	0.0193759	-1.62731
Fxa1Bg201888	407.966	237.322	333.668	0.0195085	-0.671177
Fxa3Ag101318	0	8.28451	10.7453	0.0195085	0.173885
Fxa4Dg102853	555.113	316.022	428	0.0195085	-0.696131
Fxa5Ag201743	218.378	104.106	119.511	0.0195085	-0.906083
Fxa7Dg101336	5.36197	60.6945	139.778	0.0196462	0.185287
Fxa1Bg201173	111.931	23.6679	43.3283	0.0197717	-1.85775
Fxa3Bg203524	625.831	196.994	303.981	0.0200805	-1.393
Fxa4Cg200160	5.09066	41.3258	51.9092	0.0200805	2.47471
Fxa5Cg203005	2490	478.968	991.85	0.0203201	-1.97154
Fxa3Dg200412	8.64716	73.0113	202.696	0.0203808	2.53246
Fxa2Dg201773	1843.96	882.293	1355.5	0.0204858	-0.901156
Fxa2Cg202652	989.738	354.523	478.192	0.0206021	-1.2383
Fxa4Dg102938	12.0182	39.0538	21.2429	0.0206842	1.41072
Fxa7Bg201703	834.583	213.422	384.853	0.0209011	-1.63451
Fxa7Cg102082	1207.42	406.388	825.846	0.0209246	-1.31556
Fxa2Cg201159	33.4661	164.417	495.117	0.0210092	1.89606
Fxa7Dg100832	161.011	71.9652	137.727	0.0210092	-0.980032
Fxa2Bg200989	72.6537	366.014	329.479	0.0210092	1.93512
Fxa3Dg200743	1160.95	503.634	669.405	0.0210411	-1.01253
Fxa3Bg201202	45.5936	131.709	378.742	0.0210555	1.28319
Fxa5Cg201169	154.574	56.2711	100.429	0.0211329	-1.21626
Fxa4Ag103366	886.51	383.41	655.619	0.0214926	-1.01729
Fxa4Dg101895	8.35899	0	8.8809	0.0214926	-0.125553
Fxa6Bg101409	10.0173	52.7633	22.2649	0.0217764	1.99216
Fxa3Bg203593	118.582	373.518	342.167	0.0218742	1.37827
Fxa4Bg101812	1028.58	4050.51	2982.44	0.0218742	1.64037
Fxa3Cg102802	493.812	219.424	254.665	0.0218742	-0.98204
Fxa6Cg101054	109.3	386.34	289.555	0.0218742	1.51431
Fxa7Bg202817	499.741	179.058	277.398	0.0218742	-1.23447
Fxa3Bg201517	3.43656	25.0397	32.006	0.0221368	2.46184
Fxa4Ag101889	1391.02	6090.91	6510.39	0.0225692	1.76133
Fxa1Ag100681	13.5151	151.623	74.4912	0.0227402	2.86219
Fxa6Bg102447	8.03906	62.5024	35.0332	0.0227469	2.42663
Fxa3Dg201731	20.0469	88.6719	176.179	0.0227558	1.7711
Fxa3Cg101285	152.083	64.655	120.934	0.0227643	-1.03195
Fxa3Ag101662	301.9	35.1903	112.48	0.0227788	-0.192787
Fxa4Ag100844	22.2378	65.1679	51.5379	0.0228316	1.27094
Fxa3Cg100405	108.782	24.4733	47.8691	0.0229162	-1.78123
Fxa6Ag103215	162.292	1094.83	1420.98	0.0231138	2.27091
Fxa1Bg201535	2.4395	24.2612	34.432	0.0233266	2.79949
Fxa1Dg200599	23.537	144.143	72.691	0.0233565	2.15565
Fxa5Bg102206	171.925	34.1225	70.7468	0.0233565	-1.9247
Fxa2Cg200352	88.1024	16.8126	252.89	0.0233565	-1.97435
Fxa3Bg200336	1396.28	947.689	970.129	0.0233565	-0.490004
Fxa1Bg201223	305.142	888.114	1197.12	0.0234269	1.28039
Fxa7Bg200743	0.688479	15.1213	19.7749	0.0235828	3.67833
Fxa7Dg101177	173.046	94.9298	139.041	0.0235828	-0.735705
Fxa5Bg100803	77.3311	180.857	115.097	0.0236323	1.02183
Fxa2Dg200808	1.74551	20.6759	19.1486	0.0237055	2.91412
Fxa7Ag202623	1.37696	15.6915	10.6018	0.0237438	2.86832
Fxa7Dg102549	745.743	224.972	426.802	0.0237696	-1.43165
Fxa5Ag203414	1682.89	504.36	758.634	0.0237696	-1.43716
Fxa5Dg201080	35.7235	108.01	106.392	0.0238584	1.33489
FxaCTg000007	59.016	0	32.8616	0.0239346	-0.0313195
Fxa3Bg203595	0.688479	24.6715	21.1091	0.0239346	0.153252
Fxa3Bg203172	14.9462	57.561	31.3484	0.023984	1.59574
Fxa1Bg200346	67.9416	232.948	149.312	0.023984	1.47296
Fxa7Bg201550	2427.81	1373.26	1578.92	0.023984	-0.699532
Fxa2Dg201170	759.399	250.836	370.037	0.0240004	-1.31873
Fxa7Cg102720	86.4175	5.41314	56.3076	0.0241337	-0.111619
Fxa5Cg200773	18.1173	95.0634	35.6472	0.0244092	1.96655
Fxa7Ag200624	2.83528	21.1738	22.4244	0.0245494	2.37079
Fxa6Bg102052	103.195	34.9604	51.5496	0.0245494	-1.29884
Fxa6Bg102301	230.04	104.045	160.37	0.0245494	-0.957889
Fxa1Bg200796	3.85957	127.661	188.25	0.0247896	0.0700809
Fxa4Bg103028	342.996	112.596	169.303	0.0248476	-1.33018
Fxa2Bg201020	159.252	1444.11	549.64	0.0248476	2.61481
Fxa1Cg101119	93.1551	17.7971	50.8986	0.0248476	-1.95306
Fxa2Cg201130	2938.93	7095.77	4567.59	0.0248476	1.06462
Fxa6Cg100627	166.27	304.368	215.847	0.0248487	0.736105
Fxa7Cg100023	792.266	324.095	492.862	0.0251303	-1.07496
Fxa3Bg200962	0.688479	20.4396	8.52664	0.0252629	4.02464
Fxa7Dg102191	370.359	192.051	251.11	0.0253148	-0.799058
Fxa7Ag202460	617.58	1574.05	1051.52	0.0253148	1.13051
Fxa2Ag102645	250.391	127.402	147.827	0.0253541	-0.818025
Fxa5Ag200888	1055.4	526.157	618.475	0.0253541	-0.842739
Fxa2Cg200101	16.5254	79.97	166.201	0.0254993	1.85093
Fxa2Bg203691	69.6845	344.732	408.442	0.0254993	1.89203
Fxa3Cg100994	0	12.2654	30.3983	0.0254993	0.0933292
Fxa2Ag100602	3.88096	23.0891	13.9472	0.0255565	2.14707
Fxa3Ag104306	43.1509	107.357	76.6135	0.0256295	1.08729
Fxa4Bg100838	31.3615	5.51398	16.7092	0.0257835	-2.05234
Fxa3Bg200348	105.354	549.231	687.494	0.0260006	1.95169
Fxa7Bg200434	7.34021	33.976	19.3042	0.026215	1.81667
Fxa1Bg200521	424.301	215.741	488.304	0.0262443	-0.819543
Fxa3Ag100787	1502.21	481.069	1142.02	0.0262443	-1.35446
Fxa7Cg102025	0.7371	20.8622	18.0234	0.0262501	0.198941
Fxa6Bg100922	55.0278	212.965	159.036	0.0264064	1.6043
Fxa3Ag102862	1946.48	945.345	1141.81	0.0264064	-0.87158
Fxa6Dg101045	264.252	98.7927	185.898	0.0264186	-1.17428
Fxa5Cg200261	703.499	1422.52	2130.7	0.0264663	0.85086
Fxa7Bg200995	1.42558	16.3111	58.5918	0.0264663	2.86884
Fxa7Ag203289	2.54809	39.8154	120.011	0.0265515	0.135367
Fxa2Dg201906	0.639858	33.4103	23.131	0.0265548	0.0983558
Fxa7Cg100734	166.189	458.646	400.58	0.0265548	1.21172
Fxa2Ag103308	0.319929	12.1323	66.8236	0.0266609	4.00604
Fxa5Dg200564	1498.14	912.436	834.599	0.0267774	-0.611635
Fxa2Bg202001	1822.07	776.185	1108.92	0.0268734	-1.02223
Fxa4Ag100260	3.12247	43.542	46.7548	0.027214	0.145003
Fxa4Bg100506	389.404	747.215	650.947	0.0272705	0.789623
Fxa1Dg201386	42.6987	309.294	439.419	0.0273265	2.32475
Fxa2Dg200193	37.6385	178.109	94.6939	0.0274684	1.83322
Fxa5Dg200030	1340.83	408.184	765.272	0.0274684	-1.40734
Fxa3Cg100426	3.02522	28.8756	69.4591	0.0275776	2.61018
Fxa3Cg101327	762.139	172.255	336.316	0.0278186	-1.75173
Fxa1Bg202465	686.692	240.702	290.832	0.0278186	-1.24344
Fxa3Ag101319	0	6.44184	10.4497	0.0278186	0.195684
Fxa6Cg100200	14.2182	79.2941	272.618	0.0278186	2.02259
Fxa1Ag101758	28.5677	139.88	63.8154	0.0278186	1.87039
Fxa1Dg200408	51.6045	187.742	749.749	0.0279473	1.52246
Fxa7Dg101539	15.7319	61.5246	47.2612	0.0279473	1.60078
Fxa3Bg201191	10.4899	42.2595	52.817	0.0279984	1.61468
Fxa4Cg200623	9.21019	36.7133	22.7431	0.0283446	1.61156
Fxa3Ag102931	78.8575	33.4667	58.8202	0.0284896	-1.01913
Fxa2Cg201515	141.342	24.3522	87.7272	0.028583	-2.06914
Fxa6Bg104492	2.8839	27.9921	54.1114	0.0286561	2.6619
Fxa6Dg102488	0	13.2714	6.40542	0.0287715	0.0828427
Fxa3Cg100871	22.2086	145.729	184.483	0.0293178	2.20183
Fxa1Dg200240	18.9912	80.3189	308.922	0.0293178	1.68038
Fxa6Ag101187	78.5337	11.8596	39.9085	0.0293412	-2.206
Fxa6Cg102362	773.994	1414	976.327	0.0294718	0.733401
Fxa5Cg200837	0	7.492	3.69055	0.0295701	0.148091
Fxa3Dg200270	3.60512	23.948	24.468	0.0296594	2.21816
Fxa6Bg103056	6.83617	38.5	28.1626	0.0297639	1.99814
Fxa3Dg200718	6922.62	2472.56	3582.08	0.0299167	-1.22361
Fxa3Dg200616	0	8.41094	24.7482	0.0299408	0.127193
Fxa6Bg101376	4573.01	2510.83	3078.28	0.0299408	-0.728835
Fxa5Dg201385	434.161	1668.42	3132.92	0.0300505	1.58629
Fxa6Bg102787	1.42558	19.6223	16.235	0.0300701	3.06412
Fxa4Cg202316	7346.5	1177.8	2431.68	0.0300701	-2.12736
Fxa6Bg102368	6.85303	31.9681	44.9253	0.0301628	1.7737
Fxa7Cg102407	232.725	1548.06	2286.76	0.030593	2.21457
Fxa1Dg200559	685.596	289.101	469.51	0.0306136	-1.02714
Fxa7Bg202606	2.48812	16.251	18.6747	0.0306136	2.31483
Fxa1Bg202393	18.4087	59.4671	41.2077	0.0306136	1.38794
Fxa7Ag202257	135.443	50.8075	93.9508	0.0306893	-1.16008
Fxa4Bg101584	1338.28	628.365	620.76	0.030786	-0.903239
Fxa1Ag101815	0.36855	15.4542	9.57347	0.030786	4.24197
Fxa6Ag100751	17708.7	5919.96	8741.66	0.030786	-1.28922
Fxa1Dg202743	477.329	287.248	290.179	0.0307908	-0.620336
Fxa2Cg201331	2.7053	39.8757	22.3494	0.0307908	3.10735
Fxa4Ag100321	16.7673	58.8544	44.0111	0.0307908	1.47917
Fxa6Ag101958	2118.07	689.516	1169.3	0.0307908	-1.32172
Fxa2Bg200534	1552.39	612.004	1014.31	0.0307908	-1.10463
Fxa2Cg203350	1.21975	32.3493	19.2193	0.0307908	3.89092
Fxa6Ag100643	9.57389	128.646	39.2657	0.0307908	3.03594
Fxa5Cg200689	358.197	168.074	193.731	0.0308969	-0.902618
Fxa6Ag102958	931.898	334.264	398.27	0.0310602	-1.20953
Fxa5Cg200931	38.2304	240.891	439.149	0.0310903	2.14922
Fxa2Cg203165	628.7	276.444	389.346	0.0310929	-0.97774
Fxa2Dg201690	468.452	1254.86	972.481	0.0311868	1.16788
Fxa3Cg101174	0.36855	13.2316	15.1054	0.0314919	0.229517
Fxa7Ag201035	25.018	97.1904	107.678	0.0315331	1.58195
Fxa3Dg203126	24.7519	102.915	53.6492	0.0316653	1.67249
Fxa3Ag103478	288.73	572.867	412.571	0.0316653	0.824016
Fxa3Dg200220	171.862	931.496	768.366	0.0316653	1.97572
Fxa7Dg101065	19.5983	88.8034	289.987	0.0317207	1.7521
Fxa4Dg101458	949.65	3880.26	2599.66	0.0320519	1.64819
Fxa3Bg202554	1449.19	710.411	806.784	0.0320852	-0.853524
Fxa2Cg202604	4.19635	33.8216	58.0015	0.0320852	2.41315
Fxa5Cg200364	3382.33	890.381	1383.09	0.0325801	-1.56279
Fxa6Dg102961	196.836	59.1129	102.632	0.0330843	-1.40538
Fxa4Bg101840	1324.32	8902.28	9439.41	0.0332388	2.21908
Fxa3Ag103509	0.36855	13.4291	119.462	0.033457	0.197633
Fxa2Ag100600	290.041	1237.92	830.088	0.0335844	1.69712
Fxa2Bg202566	881.058	482.468	602.757	0.033806	-0.725628
Fxa3Dg203106	1444.92	493.007	949.496	0.033806	-1.26208
Fxa3Cg103534	2.35814	30.9135	12.2249	0.03385	3.02868
Fxa6Cg103882	6447.63	2310.42	3472.42	0.0345325	-1.20406
Fxa2Bg201202	5.57785	32.4568	19.2952	0.0346529	2.05078
Fxa4Dg102764	677.002	309.552	445.34	0.0346529	-0.928824
Fxa6Ag100298	1848.26	986.712	1170.75	0.0346587	-0.752706
Fxa7Ag203124	2.43399	20.8603	23.7105	0.0348279	2.46426
Fxa3Bg202049	4.10365	20.5376	13.5598	0.0348408	1.88677
Fxa6Cg100503	1785.67	665.435	1117.15	0.0348408	-1.16062
Fxa5Ag201248	0	8.30036	5.99682	0.0348408	0.117641
Fxa5Dg200503	0.319929	10.8491	6.28394	0.0349217	3.8451
Fxa7Ag200625	101.926	243.336	187.278	0.0349217	1.02616
Fxa5Dg201957	261.304	104.323	161.057	0.0351188	-1.08214
Fxa3Ag100352	76.4695	282.516	330.248	0.0352771	1.52143
Fxa7Bg202111	22.8777	110.725	110.923	0.0353494	1.82682
Fxa4Bg100333	1486.84	768.371	894.598	0.0354619	-0.789849
Fxa4Dg101438	4599.59	1312.62	3067.08	0.0354619	-1.46949
Fxa5Ag200415	2459.98	1178.36	1554.37	0.0354619	-0.874485
Fxa7Ag201791	951.913	3029.55	2139.89	0.0355866	1.35419
Fxa1Bg200264	2.92798	32.8467	19.0593	0.0355866	2.7527
Fxa3Bg200335	65.1171	21.2563	44.2642	0.0357117	-1.30467
Fxa1Bg202135	82.1715	779.156	1739.97	0.0357659	2.58923
Fxa1Cg100310	38.6297	84.2097	61.6485	0.0359818	0.926565
Fxa4Bg101605	12.5385	55.4317	34.1988	0.0360607	1.70953
Fxa3Bg202719	1589.94	846.12	886.52	0.0360607	-0.749191
Fxa7Dg100114	381.594	166.673	223.631	0.0360607	-0.975899
Fxa6Bg104504	159.255	263.359	209.67	0.0361807	0.614281
Fxa3Bg200161	7687.83	3557.42	3851.61	0.0361807	-0.911841
Fxa1Bg200826	82.7242	30.9866	53.3518	0.0361888	-1.14257
Fxa7Dg101138	825.46	334.347	348.436	0.0362141	-1.06212
Fxa2Dg201076	16.3413	156.478	103.546	0.0362495	2.59265
Fxa5Dg200281	3395.75	870.88	1664.84	0.0365735	-1.57595
Fxa3Cg101030	59.1953	129.842	99.9173	0.0365735	0.934523
Fxa7Dg101404	4259.14	1390.46	2857.36	0.0366583	-1.30347
Fxa2Dg202970	478.63	100.806	161.763	0.0366812	-1.79783
Fxa4Ag102865	145.023	299.789	259.622	0.0367504	0.859865
Fxa2Cg203335	7637.66	3026.3	5486.44	0.0368848	-1.09056
Fxa5Ag202437	9.02576	35.329	18.6643	0.036915	1.59536
Fxa7Ag201434	1291.64	656.507	766.382	0.0369872	-0.805729
Fxa3Ag103597	30.6069	70.1935	44.5686	0.0369872	0.971276
Fxa1Bg202336	591.433	194.817	467.71	0.0372717	-1.29246
Fxa2Ag103626	52.9089	128.068	104.699	0.0372717	1.03839
Fxa2Dg201422	573.23	296.207	510.034	0.0372717	-0.788366
Fxa3Cg100257	237.532	120.999	131.572	0.0373245	-0.803878
Fxa4Ag101362	99.6451	38.3487	66.7219	0.037329	-1.11553
Fxa2Ag100601	514.786	1839.39	2177.87	0.0373963	1.47841
Fxa7Dg102281	43.1998	13.4491	21.3389	0.0376427	-1.35571
Fxa6Cg103462	24.3191	80.9847	79.1049	0.0377634	1.39047
Fxa4Cg200114	8.70712	62.817	111.909	0.0378216	0.265494
Fxa4Bg102761	405.038	927.526	564.092	0.0378216	0.977709
Fxa3Bg200810	2.11957	18.1009	44.0658	0.0378516	2.57793
Fxa1Ag100101	344.787	158.44	276.562	0.0378516	-0.918727
Fxa1Dg201689	80.6237	8.35828	23.6278	0.0378516	-2.58131
Fxa2Dg201179	209.84	66.1565	83.2733	0.0378516	-1.33718
Fxa6Cg103594	0	6.64633	19.5196	0.037874	0.143301
Fxa3Ag101939	2793.93	1437.97	2139.26	0.037874	-0.79482
Fxa6Bg100675	131.156	48.9027	82.9553	0.037874	-1.15334
Fxa3Ag102397	4.4722	29.7072	53.0489	0.0381625	2.18272
Fxa6Dg104202	162.896	272.229	275.207	0.0382857	0.622109
Fxa2Cg200373	310.127	162.221	222.667	0.0382857	-0.767194
Fxa6Ag101907	32.8567	4.91159	15.6741	0.0382857	-2.17799
Fxa1Dg201841	364.718	185.035	269.537	0.0384221	-0.803688
Fxa3Ag101317	2.40676	21.9211	15.9296	0.0384693	2.59695
Fxa3Ag102062	7.93048	31.8915	20.9128	0.0384693	1.6002
Fxa3Cg102422	326.309	149.013	215.598	0.0384693	-0.922059
Fxa4Dg102647	612.67	108.446	247.542	0.0384853	-1.98356
Fxa5Bg101772	131.473	912.166	823.018	0.0384853	2.22312
Fxa7Bg201071	17.4402	68.0289	110.216	0.0384853	1.55819
Fxa1Bg202569	768.772	190.139	306.95	0.0384853	-1.60833
Fxa3Bg203330	0	7.89089	8.85784	0.038708	0.114971
Fxa4Cg202914	516.094	144.392	311.084	0.0388794	-1.46984
Fxa2Bg201664	259.52	77.686	163.016	0.0388794	-1.39173
Fxa4Bg102405	30.8208	134.089	177.347	0.0389213	1.68617
Fxa6Dg101058	0.7371	13.2077	25.3148	0.0389213	3.40263
Fxa3Bg202950	145.86	804.996	718.227	0.0390772	1.96574
Fxa4Ag101865	910.359	281.305	818.104	0.0392385	-1.35959
Fxa6Cg104214	663.753	164.142	316.013	0.0392525	-1.60847
Fxa6Ag100753	13592.7	1604.84	4244.51	0.0394405	-2.42232
Fxa4Dg101323	1045.13	446.994	933.813	0.0394767	-0.993727
Fxa5Cg203175	926.279	407.924	631.825	0.0396231	-0.966589
Fxa7Bg201565	0	7.71331	37.5949	0.0397053	0.11651
Fxa4Ag102638	99714.5	25344.1	38149.1	0.0398703	-1.57125
Fxa1Dg200082	210.5	97.6207	169.284	0.0398938	-0.903619
Fxa3Ag103378	0	6.44465	7.75829	0.0399762	0.142072
Fxa2Dg203284	244.913	124.895	126.276	0.0401719	-0.795123
Fxa5Ag203777	42.8092	8.37694	17.8643	0.0401719	-1.86342
Fxa6Bg100526	3281.57	1657.2	2596.69	0.040228	-0.808966
Fxa5Ag200761	2180.64	1193.16	1369.5	0.0402405	-0.718659
Fxa7Bg202443	329.519	191.214	217.963	0.0404572	-0.653233
Fxa6Bg100307	12.051	62.0684	49.0923	0.0405046	1.87731
Fxa7Bg202523	1689.18	381.059	670.416	0.0406605	-1.70399
Fxa1Ag100749	4.96522	38.9706	148.294	0.0406605	0.232714
Fxa3Cg101725	124.434	16.6931	309.338	0.0408754	-0.184216
Fxa4Ag102748	0	6.07941	41.6831	0.040889	0.151206
Fxa2Bg200070	1068.28	403.222	688.062	0.0409281	-1.12695
Fxa6Ag100835	25.6906	84.4676	154.577	0.0411871	1.36206
Fxa2Dg201511	361.821	123.036	200.299	0.0413474	-1.24949
Fxa7Ag201660	6.83617	80.8349	223.979	0.0413474	0.121925
Fxa3Bg200880	56.029	322.21	473.815	0.0413511	1.99748
Fxa6Bg100865	5363.24	1259.22	2291.16	0.0413511	-1.65317
Fxa2Bg200099	18.9458	45.1492	33.4572	0.0413725	1.01808
Fxa6Cg103136	3.63786	24.0907	22.959	0.0414816	2.16288
Fxa1Ag100817	6208.88	2546.49	3173.08	0.0417148	-1.03034
Fxa7Dg101165	256.584	53.4413	187.004	0.0417148	-1.79541
Fxa3Bg201809	0	7.50454	15.9971	0.0418069	0.117324
Fxa1Bg200302	66.0567	14.3699	53.6773	0.0419694	-1.75766
Fxa5Ag201061	54.009	296.415	472.253	0.0420567	1.94091
Fxa5Ag201553	171.616	317.906	246.468	0.0421307	0.733428
Fxa1Cg101021	4426.75	2661.53	2948.93	0.0421431	-0.612688
Fxa2Bg202726	680.013	2489.57	3004.71	0.0424767	1.48931
Fxa3Dg202580	1166.95	582.159	658.347	0.0425233	-0.818935
Fxa5Cg201777	6.95578	47.3726	30.8232	0.0426773	2.18769
Fxa7Ag202902	589.999	91.4282	232.226	0.0426773	-0.214285
Fxa2Bg203308	3.98501	37.4045	20.2788	0.0426773	2.51839
Fxa6Ag100287	2.16268	35.9881	17.3099	0.0431612	3.18639
Fxa6Dg100874	496.272	202.538	237.795	0.0432133	-1.03846
Fxa4Bg103226	1.00841	20.0387	17.8569	0.0432159	0.151913
Fxa6Dg100242	195.61	614.133	703.941	0.0432159	1.31565
Fxa1Ag101748	3.01388	19.2549	10.6368	0.0432159	2.14558
Fxa5Bg101845	264.161	81.1794	130.767	0.0432159	-1.3522
Fxa1Dg202929	9.22024	44.5311	54.953	0.0432969	1.80959
Fxa4Ag103275	1248.82	481.985	864.959	0.0433071	-1.10398
Fxa6Cg100012	0.959787	19.5711	67.906	0.0434437	0.155404
Fxa7Dg102748	50.918	150.315	80.4147	0.0434572	1.24623
Fxa7Ag202827	11.5842	50.8294	25.5698	0.0435363	1.6887
Fxa6Dg103666	2306.36	1381.17	1529.81	0.0435363	-0.618081
Fxa3Cg100151	1844.2	814.298	934.479	0.0435363	-0.946082
Fxa4Ag103214	18.4486	71.1648	84.5293	0.0436257	1.53195
Fxa5Ag201469	758.333	411.541	591.417	0.0437138	-0.724095
Fxa7Bg200097	3985.41	1661.88	2784.49	0.0437266	-1.01315
Fxa3Dg201407	1691.64	6559.61	4404.31	0.0440467	1.54884
Fxa3Bg200436	5.58466	27.4082	63.8985	0.0440515	1.7582
Fxa1Ag101584	1648.45	2908.42	1916.65	0.0442016	0.677829
Fxa6Bg104343	55.2329	221.948	245.405	0.0444141	1.58742
Fxa6Ag105006	367.895	105.05	182.454	0.0445308	-1.43072
Fxa7Bg202633	45.0474	102.68	67.9197	0.0448514	0.961243
Fxa7Ag200027	157.21	70.8137	103.353	0.0448931	-0.930245
Fxa2Dg203131	242.772	689.104	436.09	0.0449055	1.20255
Fxa6Ag104209	3431.9	2188.18	2454.47	0.0449691	-0.545815
Fxa1Dg201705	214.278	628.097	579.265	0.0449691	1.23695
Fxa3Ag101113	431.959	1111.2	695.685	0.0449691	1.09239
Fxa1Cg101271	121.177	543.064	957.187	0.0453263	1.70695
Fxa3Cg102923	852.525	250.741	443.542	0.0453263	-1.39793
Fxa5Dg200817	102.175	285.889	303.32	0.0453263	1.18248
Fxa2Ag103379	70.6751	20.6218	50.0188	0.0454897	-1.40339
Fxa5Cg200776	31.7342	131.133	121.14	0.0455059	1.61699
Fxa4Ag101870	51.5322	101.534	83.5108	0.0455059	0.788191
Fxa6Bg104317	0	24.9427	9.35001	0.0455623	0.0442914
Fxa4Cg201607	610.806	1953.41	1712.58	0.0456006	1.33026
Fxa2Dg202543	38.7937	129.533	204.153	0.0456254	1.37698
Fxa2Bg202749	7.03065	64.3648	65.6097	0.0456254	2.48597
Fxa2Bg201564	11024.4	3723.51	5702.94	0.0458329	-1.24213
Fxa6Ag100481	0	11.244	3.64744	0.0458835	5.09571
Fxa1Bg200682	178.857	86.9875	158.387	0.0461129	-0.84036
Fxa6Bg101035	102.206	401.504	546.951	0.0461508	1.55678
Fxa1Ag100919	568.265	220.787	316.301	0.0461508	-1.08825
Fxa5Ag200553	172.778	94.4407	121.637	0.0461508	-0.712357
Fxa2Dg203382	16.6758	84.0536	42.972	0.0462723	1.8244
Fxa6Dg104141	138.726	37.6813	71.5537	0.0465971	-1.48618
Fxa6Bg100849	26.5304	167.812	209.561	0.0467608	2.07872
Fxa1Dg200704	3851.72	1706.45	2099.56	0.0468473	-0.933662
Fxa2Ag103813	1284.36	509.801	884.871	0.0468473	-1.05806
Fxa2Bg203506	19.5737	1.23466	8.39691	0.0468473	-0.137121
Fxa5Ag201821	2.49947	24.4855	12.3588	0.0468727	2.58151
Fxa2Bg203554	51.4171	175.304	276.94	0.0470771	1.39406
Fxa1Dg201972	258.7	452.246	372.504	0.0471787	0.663072
Fxa4Cg202590	0	18.5607	60.0782	0.0471787	0.0518892
Fxa7Ag200946	63.4811	531.386	184.344	0.0471787	2.39846
Fxa4Dg101119	1.05703	21.2817	34.3391	0.0471787	0.131429
Fxa3Dg201137	9.63871	54.7978	170.453	0.0471787	1.94211
Fxa3Bg203220	3692.79	2401.27	2499.25	0.0471787	-0.521571
Fxa5Ag201166	70.6871	173.413	187.065	0.0472224	1.03527
Fxa5Dg202693	19.8353	4.56369	14.0228	0.0472224	-1.65778
Fxa7Cg100001	1020.87	237.262	574.705	0.0473964	-1.65494
Fxa7Bg202743	72.4854	14.6118	27.7157	0.0473964	-1.81095
Fxa7Cg101442	1453.23	1040.68	941.376	0.0474515	-0.415787
Fxa7Cg102114	674.601	264.357	353.859	0.0474515	-1.07597
Fxa6Dg102563	87.881	208.097	304.347	0.0477211	0.996256
Fxa3Cg100287	93.0854	254.061	234.238	0.0477211	1.15016
Fxa2Dg201865	328.329	194.451	237.355	0.0477287	-0.623076
Fxa7Dg101469	456.863	98.9078	183.007	0.0477287	-1.72373
Fxa2Ag100165	9.19399	39.9026	376.626	0.0479086	1.68607
Fxa1Dg201357	2.77531	20.7054	8.0599	0.0482136	2.32953
Fxa3Bg200145	1.26837	16.8504	11.7026	0.0484123	0.189522
Fxa6Ag101162	138.909	576.269	738.193	0.0484123	1.6103
Fxa5Dg201280	69.5114	183.377	115.58	0.0484299	1.1137
Fxa5Ag200140	19.2006	0.333876	5.43535	0.0484299	-0.073504
Fxa7Ag200874	1849.08	786.445	962.161	0.0484299	-0.990139
Fxa5Dg202642	394.844	855.284	566.368	0.0485815	0.897755
Fxa4Ag100471	5.28515	50.7512	21.0925	0.0485815	2.53016
Fxa3Ag101009	18.6972	52.9125	32.3836	0.0485815	1.18195
Fxa7Dg101415	4258.87	1439.11	2896.7	0.0485815	-1.23117
Fxa2Ag102602	15.2217	105.282	50.3001	0.0487441	2.18195
Fxa5Dg203093	2954.69	955.63	1544.92	0.0487922	-1.27874
Fxa5Ag201478	3.21971	19.6738	12.8244	0.0489644	2.03376
Fxa7Cg102227	390.946	153.372	208.257	0.0492442	-1.07369
Fxa2Ag100753	11.8724	44.8181	24.141	0.049496	1.49965
Fxa6Bg102284	95544.8	54426.1	56374.8	0.049496	-0.665364
Fxa5Cg200395	20.6352	133.53	253.541	0.049496	0.208436
Fxa1Dg200336	1523.26	640.757	780.426	0.049496	-0.994317
Fxa3Ag101534	167.56	61.5482	79.9011	0.049496	-1.14387
Fxa7Dg101826	1951.48	882.046	1190.73	0.049496	-0.923071
Fxa3Dg200759	37.0599	130.647	220.637	0.0494966	1.41969
Fxa3Cg101615	720.262	168.555	284.86	0.0495759	-1.62834
Fxa7Cg102224	3387.16	1506.71	1460.86	0.0495759	-0.928549
Fxa6Ag105112	125.247	39.4555	74.2949	0.0496628	-1.3116
Fxa3Cg102241	79.5583	21.2456	41.2059	0.0496728	-1.48632
Fxa2Ag102546	800.714	188.978	401.022	0.0496728	-1.62113
Fxa7Cg100056	5238.58	2473.46	3698.25	0.0496728	-0.868772
Fxa7Cg101987	1488.31	636.922	861.585	0.0497105	-0.974749
Fxa2Bg203085	270.877	139.872	207.052	0.0498017	-0.769949
Fxa7Dg101375	3540.06	2067.56	1971.84	0.0505204	-0.637294
Fxa2Dg201591	181.406	414.761	635.509	0.0506302	0.94139
Fxa3Cg102589	2549.39	1213.28	1344.73	0.0506302	-0.85928
Fxa6Ag103953	74.0679	254.126	230.324	0.051009	1.39238
Fxa1Cg100778	939.15	516.597	526.367	0.0510142	-0.701463
Fxa7Bg200368	768.665	2311.54	3442.6	0.051238	1.24913
Fxa1Cg101735	35.2884	103.699	53.8514	0.0513193	1.22318
Fxa2Dg200683	302.939	671.489	360.544	0.0514383	0.920128
Fxa4Ag102636	1584.35	503.64	893.36	0.0516706	-1.29399
Fxa4Cg202147	746.352	183.495	350.817	0.0517041	-1.57307
Fxa6Ag101928	184.986	77.6707	108.423	0.0517826	-0.990725
Fxa5Dg201254	23.5759	85.7671	40.1884	0.0518639	1.46879
Fxa6Ag100047	126.331	57.2858	83.906	0.0518639	-0.910798
Fxa6Ag105105	961.624	534.943	838.827	0.0519004	-0.690251
Fxa6Bg104561	1199.89	520.547	703.332	0.052002	-0.956835
Fxa3Cg100774	449.248	186.021	229.708	0.052002	-1.00731
Fxa3Ag100249	1729.2	4588.99	5369.17	0.0522132	1.11158
Fxa6Ag103246	886.468	578.054	696.821	0.0524659	-0.517031
Fxa6Bg103574	484.634	250.39	248.56	0.0533958	-0.768288
Fxa3Dg200565	285.667	851.203	716.853	0.0534014	1.2379
Fxa5Bg100394	625.548	271.056	629.38	0.053442	-0.957522
Fxa3Cg101633	374.207	172.877	320.978	0.0535354	-0.888837
Fxa4Dg101655	249.483	76.5514	102.183	0.0535822	-1.32703
Fxa5Dg200578	419.876	745.956	639.165	0.0537654	0.676875
Fxa6Dg103159	0	5.93187	2.83076	1	0.126922
Fxa6Dg100866	92.0407	376.25	195.146	0.0538083	1.58045
Fxa1Ag102631	689.702	293.358	339.397	0.0538083	-0.977645
Fxa5Cg202922	3821.7	1167.29	1598.46	0.0538083	-1.33176
Fxa2Bg200479	6.9762	31.4357	76.8815	0.0539755	1.70532
Fxa1Dg201224	188.236	68.8133	245.95	0.0540052	-1.14545
Fxa6Cg100917	25.1256	744.068	208.542	0.0540052	3.71454
Fxa1Bg200864	191.628	79.5239	108.096	0.0540052	-1.00198
Fxa3Cg100285	29.7599	74.5611	71.6259	0.054013	1.05479
Fxa2Dg200239	352.213	192.373	234.131	0.0540652	-0.705926
Fxa5Bg100853	1095.83	517.415	566.193	0.0540904	-0.863215
Fxa5Dg200810	1.10565	24.062	54.8327	0.0540935	0.106295
Fxa4Bg101843	187.065	110.99	144.52	0.0544346	-0.617268
Fxa6Bg103983	757.67	316.758	631.74	0.0547077	-0.993297
Fxa2Cg200846	6.25045	27.0153	111.585	0.0547306	1.63438
Fxa4Ag103470	82.3381	457.601	432.052	0.0548717	1.90744
Fxa4Cg201492	12.9576	61.7007	60.5354	0.0548717	1.73187
Fxa6Dg100265	29.2691	8.37133	11.9533	0.0552494	-1.40941
Fxa6Ag102049	3.04662	17.3931	26.7662	0.0552494	1.97585
Fxa2Bg201209	805.771	237.424	401.502	0.0552494	-1.36759
Fxa2Ag100118	2903.57	1162.88	1834.39	0.0553146	-1.04358
Fxa5Dg202593	91.1363	37.6843	76.9446	0.0553208	-0.999904
Fxa7Cg102440	2031.53	560.313	995.725	0.0554318	-1.44104
Fxa2Cg200618	422.081	169.41	326.06	0.0554341	-1.03803
Fxa1Ag102012	132.768	63.6911	95.8906	0.0557557	-0.844235
Fxa1Cg100681	245.871	117.856	185.081	0.0558105	-0.84376
Fxa2Ag103419	506.369	130.857	197.325	0.0558888	-1.50727
Fxa3Bg200766	6130.85	1993.34	2895.23	0.0562043	-1.25932
Fxa5Dg202525	77.298	139.499	104.872	0.056726	0.688902
Fxa3Dg201730	111.796	529.01	569.236	0.0569259	1.72876
Fxa2Ag102780	61.38	176.737	131.874	0.0570314	1.18659
Fxa1Ag101190	568.701	1958.76	1938.43	0.0573352	1.38444
Fxa1Cg100796	1.00841	45.2994	100.668	0.0573352	0.0602885
Fxa5Cg201546	28.9767	7.43225	12.0684	0.0575784	-1.53316
Fxa3Cg100186	0	5.70725	8.82958	0.0575784	0.126078
Fxa4Bg103269	3.0625	19.8629	11.1104	0.057624	2.10954
Fxa2Bg202727	27.5142	118.19	96.1391	0.0577594	1.61976
Fxa5Bg102290	359.101	726.162	1060.84	0.0577936	0.809824
Fxa6Dg102752	219.584	1334.73	1755.58	0.0579597	1.99297
Fxa7Ag202256	136.03	42.8279	86.6684	0.0579597	-1.2933
Fxa5Bg101822	879.21	570.798	772.279	0.0579597	-0.519908
Fxa5Bg102739	45.4053	166.083	150.41	0.0581847	1.44412
Fxa1Bg200971	124.266	52.9932	68.2151	0.0585938	-0.964986
Fxa6Ag104189	87.95	291.965	256.449	0.0589634	1.33894
Fxa6Bg100615	987.992	543.198	1009.73	0.0589991	-0.698132
Fxa6Ag102525	237.79	119.543	168.01	0.0593611	-0.790328
Fxa6Dg103792	690.298	256.852	394.216	0.0594574	-1.11021
Fxa6Bg100023	40.3681	107.236	103.403	0.0595659	1.10837
Fxa5Cg203008	367.947	111.173	152.098	0.0599048	-1.3328
Fxa5Ag201627	56.9632	148.629	77.0345	0.0602082	1.08687
Fxa2Ag103448	478.456	201.119	359.651	0.0602082	-0.980503
Fxa1Cg102067	13.8451	45.7455	25.3891	0.0602082	1.33105
Fxa1Dg201122	964.575	407.232	486.454	0.0602082	-0.975935
Fxa3Cg100747	65.001	20.9383	35.2139	0.0602082	-1.26902
Fxa3Dg201935	28.1593	2.53469	7.96133	0.0603354	-0.127498
Fxa6Dg101679	1602.76	563.176	1004.27	0.06041	-1.17323
Fxa3Bg203111	3.39929	33.7816	15.2998	0.0604288	2.53546
Fxa5Cg203059	42.9557	133.307	107.635	0.0604288	1.25938
Fxa6Dg100029	1496.27	3208.03	2888.07	0.060433	0.869315
Fxa4Ag100335	1353.01	705.973	857.156	0.0606826	-0.750052
Fxa6Dg101251	8.75574	44.9307	35.4312	0.0606826	1.78506
Fxa3Cg103052	40.1995	168.04	84.9051	0.0606826	1.58384
Fxa6Cg101177	432.021	96.7614	164.575	0.0606826	-1.64831
Fxa4Bg102135	46.756	118.474	79.7469	0.060723	1.04454
Fxa4Ag103068	966.506	340.759	519.58	0.0608823	-1.1617
Fxa6Dg100195	21.868	4.00519	15.6303	0.060965	-1.87711
Fxa6Ag104442	253.498	104.14	162.534	0.0611527	-1.00094
Fxa6Ag103091	26.6549	108.794	45.7422	0.0612365	1.55534
Fxa5Dg201506	610.248	1272.07	1333.76	0.0616515	0.844425
Fxa6Bg102414	6.51041	30.7716	73.8778	0.0620373	1.7249
Fxa7Dg100879	24.0919	82.1878	212.55	0.0620401	1.35318
Fxa5Cg202349	1.79413	17.5953	8.99669	0.0624352	2.52045
Fxa3Bg203006	11.9097	36.6737	19.2567	0.0627423	1.25945
Fxa1Bg202497	570.153	345.999	467.062	0.0628271	-0.587256
Fxa1Cg100231	46.0078	225.213	504.309	0.0630184	1.73946
Fxa7Cg101334	22.0456	66.3304	72.5104	0.0632552	1.23425
Fxa1Ag102540	975.041	344.544	596.143	0.0632552	-1.15778
Fxa4Bg101577	1.66966	31.7212	33.7682	0.0632552	0.0891467
Fxa4Ag101645	31.1628	6.17052	14.0351	0.0632552	-1.78664
Fxa2Cg202937	2.01682	45.6871	17.3604	0.0632552	3.36573
Fxa7Ag202881	165.275	36.6511	55.3271	0.0632552	-1.65272
Fxa2Ag103275	5090.46	1648.15	2646.87	0.0634724	-1.24279
Fxa5Bg100854	347.442	1144.44	880.258	0.0634724	1.32252
Fxa3Ag102357	589.418	221.739	413.195	0.0636804	-1.09343
Fxa1Bg200929	543.267	1205.64	836.979	0.0636804	0.904734
Fxa3Ag100159	4793.3	2113.88	2491.37	0.0637928	-0.923524
Fxa1Ag100376	27.5236	6.51	12.6241	0.0639018	-1.59172
Fxa5Dg202796	306.656	121.863	167.775	0.0640129	-1.03425
Fxa2Cg202961	654.08	1761.13	1081.86	0.0640129	1.10499
Fxa2Cg201287	10.5554	66.7292	31.7326	0.0641174	2.01138
Fxa4Bg100117	1.74551	18.3355	40.3457	0.064265	0.181712
Fxa5Cg201420	3.15521	20.0988	9.51344	0.064402	2.02332
Fxa3Dg201141	46.544	124.278	272.324	0.0646259	1.09984
Fxa7Ag202350	79.017	17.7839	47.8079	0.0646259	-1.63906
Fxa1Dg200849	556.673	2257.79	4994.37	0.0646259	1.54044
Fxa3Dg202865	129.717	32.4104	62.2917	0.0646259	-1.52366
Fxa7Ag201640	6118.91	1509.04	3561.1	0.0646259	-1.53186
Fxa1Ag101080	473.856	210.391	305.523	0.0646259	-0.91518
Fxa3Dg202763	14.1051	43.3514	21.4276	0.0651642	1.25045
Fxa3Cg100537	933.834	563.01	746.399	0.0651642	-0.59418
Fxa3Dg201713	118.726	21.919	43.9905	0.0651685	-0.243578
Fxa4Cg200299	1618.9	858.538	951.807	0.0653584	-0.727555
Fxa6Ag100950	6496.61	1740.14	2776.85	0.0658476	-1.44145
Fxa3Dg200143	8834.47	4007.98	4812.59	0.0659651	-0.886133
Fxa2Cg200454	1.74551	14.6795	19.4838	0.0659669	2.3185
Fxa3Cg100222	119.603	56.1389	64.4129	0.0663569	-0.849764
Fxa6Ag102371	192.509	352.199	255.429	0.0672715	0.697174
Fxa2Dg203381	1260.03	460.452	844.559	0.0677718	-1.11554
Fxa6Ag102303	7.88185	29.5526	14.3793	0.0677718	1.44579
Fxa2Cg203409	47.8458	2.77333	15.1905	0.0677718	-0.0818026
Fxa3Cg100643	364.394	177.07	225.686	0.0679611	-0.815607
Fxa3Bg203459	7.23163	76.2789	126.584	0.0679611	0.10941
Fxa3Ag103067	359.786	166.488	298.409	0.0679611	-0.869053
Fxa1Bg201283	675.304	2542.66	1899.47	0.0679955	1.45293
Fxa3Cg103712	23.8148	3.20805	10.0925	0.0680728	-0.184288
Fxa6Bg103236	15.8405	77.5155	176.093	0.0684557	1.71878
Fxa1Bg201111	845.208	4438.91	3577.66	0.0685208	1.80564
Fxa6Dg101696	641.404	1076.43	836.442	0.0685208	0.605638
Fxa3Ag100742	926.433	369.716	450.794	0.0686823	-1.02002
Fxa1Cg100238	891.052	480.293	509.442	0.0687203	-0.707631
Fxa3Bg200361	1659.01	507.077	960.96	0.0687588	-1.29481
Fxa5Ag201146	431.798	210.55	302.385	0.068779	-0.811562
Fxa2Bg203200	103.598	37.4481	70.332	0.068779	-1.12208
Fxa6Ag102997	47.753	175.501	208.779	0.0689812	1.42397
Fxa6Dg100768	1423.2	760.95	838.578	0.0689812	-0.718626
Fxa7Ag202482	998.54	549.612	742.648	0.0689812	-0.679102
Fxa6Dg101001	7.99142	25.9382	51.782	0.0690874	1.26787
Fxa6Dg101862	10.3223	55.6072	181.993	0.0691205	0.283287
Fxa3Cg101372	24.9859	79.2028	43.6383	0.0691205	1.27161
Fxa3Bg203275	952.24	494.609	740.109	0.0691385	-0.746284
Fxa2Dg203002	132.364	77.0034	93.3922	0.0691385	-0.626254
Fxa3Ag101355	143.09	364.226	265.733	0.0692603	1.03731
Fxa3Ag100116	351.382	63.8991	340.235	0.0695536	-0.210541
Fxa2Ag102821	768.84	407.772	496.441	0.0695536	-0.724075
Fxa6Dg103638	67.4214	173.192	202.704	0.0699178	1.04552
Fxa5Ag202536	108.859	240.071	460.469	0.069995	0.88873
Fxa1Dg201269	23.4102	154.421	118.487	0.0701821	2.02682
Fxa5Bg100304	1472.14	395.28	763.492	0.0703166	-1.43347
Fxa3Dg201813	89.2949	158.976	102.462	0.0703543	0.660692
Fxa2Cg203454	8311.74	3367.44	4538.5	0.0705135	-1.002
Fxa3Ag100201	2291.45	1225.26	1662.05	0.0707275	-0.714783
Fxa6Dg100355	378.73	114.586	160.131	0.0707275	-1.30599
Fxa7Dg102269	312.323	193.215	201.137	0.0707546	-0.561853
Fxa4Ag100709	423.021	43.0421	123.911	0.0712935	-0.108285
Fxa4Dg101340	250.04	34.7967	106.485	0.0714579	-0.143414
Fxa4Ag100179	0.639858	16.181	17.1087	0.0714579	0.131281
Fxa2Dg201723	1.27972	24.7882	41.5592	0.0714579	0.100349
Fxa3Ag100256	318.996	93.1844	126.955	0.0715348	-1.33801
Fxa6Cg102689	68.7066	137.432	113.641	0.0719206	0.779619
Fxa5Cg200312	0.319929	8.48619	17.1274	0.0719206	0.244622
Fxa6Dg102903	60.9469	150.36	193.027	0.0724631	1.00019
Fxa5Dg200925	1084.5	677.165	705.575	0.072558	-0.552526
Fxa1Ag101797	47.9261	113.953	77.9787	0.0727779	0.959071
Fxa6Bg103057	13.6675	52.0931	41.4291	0.072837	1.45182
Fxa5Bg100850	17.2888	116.944	209.464	0.0729753	0.162118
Fxa5Ag203465	346.469	167.318	252.022	0.0729797	-0.818913
Fxa6Dg100374	1544.9	732.879	992.684	0.0731313	-0.835856
Fxa2Ag103459	144.625	22.4809	62.0178	0.0732828	-0.165065
Fxa1Ag103007	6.26633	31.0383	17.7017	0.0732828	1.73203
Fxa3Dg200611	19.9983	84.6667	108.973	0.0733083	1.5585
Fxa6Dg100625	23.677	0.298393	6.13572	0.0733083	-0.0516192
Fxa3Ag100777	0	6.50439	4.13346	0.0735521	0.0956126
Fxa7Cg100251	92.4711	157.542	138.11	0.0737614	0.616772
Fxa7Bg201527	210.159	101.42	108.209	0.0737614	-0.818605
Fxa4Ag101860	359.561	68.2764	228.605	0.0737614	-0.219798
Fxa3Ag102694	2.60805	18.2612	38.0788	0.0739947	2.04557
Fxa3Cg100194	1206.68	580.198	832.737	0.0739947	-0.828328
Fxa1Ag100686	33.4211	179.197	115.512	0.0739947	1.80129
Fxa2Cg200894	380.67	126.647	198.53	0.0739947	-1.20003
Fxa5Ag203707	173.06	71.7206	138.329	0.0739947	-0.973158
Fxa6Ag100444	11.2484	31.8173	20.2338	0.0739947	1.13479
Fxa5Ag201957	75.7687	143.572	118.148	0.0739947	0.722277
Fxa5Ag200198	139.649	54.9453	78.5412	0.0739947	-1.02881
Fxa4Bg101077	1.5883	14.2037	6.5176	0.0744032	2.45543
Fxa1Dg200721	2119.78	899.509	905.854	0.0744919	-0.947945
Fxa2Ag100824	21.6803	4.50246	15.9919	0.0747067	-1.72539
Fxa5Dg201665	443.494	147.75	243.775	0.074742	-1.19355
Fxa7Dg101467	805.681	356.903	470.464	0.0748604	-0.906173
Fxa4Ag100728	10.1473	46.3596	101.219	0.0750302	1.64057
Fxa5Ag200455	4533.79	2200.8	2941.56	0.0754325	-0.808742
Fxa3Ag103116	1.00841	19.1136	8.65432	0.0757755	3.16128
Fxa1Bg201776	0	5.24547	15.4715	0.0758654	0.113938
Fxa2Dg201934	1503.74	813.333	992.556	0.0761596	-0.700245
Fxa6Dg101101	797.915	455.458	517.236	0.0761596	-0.644496
Fxa6Ag103108	311.314	678.865	637.514	0.0761596	0.869205
Fxa2Cg203277	713.638	338.206	391.619	0.0761596	-0.834432
Fxa3Dg200709	2273.87	823.35	1449.55	0.0763669	-1.10749
Fxa2Cg201420	60.981	19.1451	29.7415	0.0763669	-1.26434
Fxa2Dg200807	555.953	1226.05	1514.01	0.0763669	0.87608
Fxa7Ag200996	14.9994	44.0289	113.14	0.0763669	1.16992
Fxa7Cg101905	1.37696	12.5001	35.4368	0.0763669	2.36039
Fxa5Bg101695	49.7507	154.096	202.751	0.0765884	1.22907
Fxa7Cg101039	67.9578	113.117	131.81	0.0766845	0.588159
Fxa2Ag103381	1442.52	924.835	1186.58	0.0769846	-0.522871
Fxa2Bg203125	18.741	2.10838	7.63607	0.0770743	-0.162164
Fxa6Ag102737	14.3064	2.80321	8.61313	0.0770759	-1.7921
Fxa5Ag200978	282.095	111.429	210.541	0.0770759	-1.01672
Fxa5Ag200192	129.928	632.148	1031.87	0.0773536	1.68975
Fxa4Ag100116	0	5.83103	2.82109	1	0.102156
Fxa1Bg200542	161.574	72.0301	82.2103	0.0778199	-0.893154
Fxa3Ag103800	3.63786	19.1806	10.1619	0.0780224	1.79309
Fxa6Ag104761	494.711	258.915	313.359	0.0780224	-0.73101
Fxa7Cg103062	72.2216	145.128	195.663	0.0780224	0.788523
Fxa4Cg201118	29.1599	82.6584	220.724	0.0780224	1.12894
Fxa5Dg202675	26.2594	188.934	150.732	0.0780924	2.08408
Fxa6Bg100207	0.319929	12.2384	8.0574	0.0780924	0.107577
Fxa6Bg104072	1015.93	476.011	643.761	0.0786192	-0.841747
Fxa3Cg100872	1.79413	14.5735	13.2574	0.0786192	0.272625
Fxa6Dg103211	395.566	158.437	257.46	0.079004	-1.0045
Fxa2Dg203561	14.7945	59.884	23.8924	0.0792918	1.50672
Fxa3Bg200523	93.2854	228.375	127.721	0.0792918	0.983471
Fxa7Cg100101	656.83	382.31	462.115	0.0792918	-0.618056
Fxa7Dg101378	110.599	731.738	1311.33	0.0792918	1.98877
Fxa6Ag103729	99.845	275.342	173.318	0.0792978	1.10539
Fxa3Bg200881	81.6259	407.006	648.037	0.0792978	1.70533
Fxa2Bg202472	0	8.68655	22.2659	0.0793413	0.0707799
Fxa3Cg103380	241.904	3.70119	87.8015	0.0793601	-0.0342606
Fxa7Bg200742	0.319929	11.365	4.55681	0.0794656	3.60535
Fxa7Dg101322	453.9	306.742	315.925	0.0794656	-0.468817
Fxa7Ag201494	5.12794	25.6987	30.7818	0.0794656	1.72463
Fxa6Cg101968	62.2215	14.9687	27.7004	0.0794656	-1.52142
Fxa3Cg101353	296.102	73.526	124.308	0.0794656	-1.48317
Fxa5Cg201641	0	10.515	5.59819	0.0794964	0.0620606
Fxa2Bg201155	980.129	450.839	967.537	0.0794964	-0.859094
Fxa4Cg201365	0.639858	11.8778	6.21839	0.0795973	3.14454
Fxa5Cg202213	231.67	97.4575	151.412	0.0795973	-0.951845
Fxa4Cg201580	1395.62	519.581	1785.76	0.0797977	-1.07495
Fxa3Ag103586	18.551	4.03226	8.36061	0.0804952	-1.63663
Fxa2Dg200912	1843.46	816.503	1115.05	0.0804952	-0.896998
Fxa3Bg202518	355.655	145.918	251.734	0.0804952	-0.973456
Fxa6Cg100948	1359.24	639.393	745.239	0.0806429	-0.836479
Fxa1Cg100657	34.9393	223.809	157.768	0.0808576	1.95596
Fxa5Ag202529	39.4634	123.778	70.8725	0.0813553	1.23123
Fxa2Cg200235	877.199	356.476	620.32	0.0814006	-0.970632
Fxa7Bg200710	20.4518	68.4539	57.6777	0.0814006	1.29974
Fxa1Dg201038	0.319929	9.49491	28.2424	0.0814396	0.148284
Fxa3Cg100418	22.4333	70.0699	128.462	0.0814396	1.22033
Fxa4Cg200178	0.36855	8.60436	31.2851	0.0814396	0.178667
Fxa5Ag201809	0.639858	15.472	38.4092	0.0814396	0.126328
Fxa6Bg102361	145.706	283.033	286.346	0.0814396	0.746446
Fxa2Cg202919	1531.12	697.847	922.448	0.0814396	-0.865797
Fxa7Dg102737	1104.03	566.619	631.745	0.0814396	-0.74619
Fxa1Bg201371	56.8958	243.05	94.4605	0.0814396	1.55069
Fxa6Ag104746	72.0009	160.131	140.222	0.0814396	0.879742
Fxa3Cg100965	11.5693	59.6554	22.139	0.0814396	1.74418
Fxa2Cg200657	1658.82	601.925	1219.64	0.0814562	-1.09529
Fxa3Ag103548	2995.68	1715.4	1811.63	0.0814667	-0.63396
Fxa7Bg202712	80.4076	17.7685	36.6501	0.0816234	-1.5909
Fxa7Ag203117	36.6917	9.12738	26.308	0.0816234	-1.47035
Fxa3Cg102459	1124.93	1884.61	2496.11	0.0816234	0.594619
Fxa5Dg200774	84.6201	28.1586	37.4816	0.0816234	-1.17979
Fxa6Ag102095	346.371	214.353	200.743	0.0816304	-0.556444
Fxa1Cg100926	38.1088	4.81355	12.7401	0.0816304	-0.141232
Fxa5Ag200043	355.425	103.307	243.316	0.0820404	-1.31884
Fxa3Dg200435	125.04	268.07	431.253	0.0820404	0.845888
Fxa6Bg102437	325.986	615.819	360.471	0.0825243	0.716577
Fxa3Cg103775	102.833	178.189	142.089	0.0825243	0.62357
Fxa1Dg201162	58.9995	219.428	519.434	0.0828273	1.39527
Fxa3Bg201906	0.319929	8.76495	5.21563	0.0828273	0.170813
Fxa3Dg202866	32.435	119.907	195.821	0.0828273	1.38427
Fxa7Ag201755	1131.11	249.38	472.914	0.0830703	-1.58841
Fxa2Ag101103	261.66	743.922	702.361	0.0830703	1.12556
Fxa7Bg202740	147.356	53.3626	86.3799	0.0830703	-1.09301
Fxa2Ag103458	5.28612	32.9344	14.848	0.0832584	1.92881
Fxa6Dg104125	498.326	131.805	250.407	0.0832584	-1.41232
Fxa3Bg200514	267.57	1267.81	8010.95	0.0834994	0.24755
Fxa2Dg203024	581.748	274.702	414.87	0.0836445	-0.827535
Fxa7Ag201604	8610.3	5524.63	4866.24	0.0836613	-0.518447
Fxa2Cg202167	84.6703	165.015	133.711	0.083786	0.742511
Fxa2Ag103839	2548.89	1662.64	1981.26	0.0847363	-0.500752
Fxa6Dg100175	5116.12	2493.14	3006.03	0.0849431	-0.797348
Fxa6Cg100704	53.5724	133.355	218.88	0.0849957	0.987714
Fxa6Cg101688	182.569	83.216	102.79	0.0851902	-0.858738
Fxa4Dg100825	423.595	227.061	324.192	0.0851902	-0.700268
Fxa5Dg200803	74.3334	23.7869	37.6929	0.085225	-1.21524
Fxa2Cg202537	3896.62	1236.79	2051.2	0.085225	-1.21414
Fxa7Cg101001	1.32834	23.6704	53.3852	0.0852665	0.0965349
Fxa3Dg201848	429.903	271.224	351.847	0.085373	-0.53513
Fxa2Dg202173	149.027	68.7872	77.2082	0.0854884	-0.844061
Fxa6Bg100409	137.31	35.3359	59.8268	0.0854884	-1.43138
Fxa6Bg100988	42.1742	106.254	74.1832	0.0855435	0.999469
Fxa1Ag100950	0.959787	15.7181	17.6305	0.0855519	0.133833
Fxa6Cg103306	386.617	158.658	264.45	0.0859783	-0.96767
Fxa6Bg103007	591.466	351.541	328.101	0.0864269	-0.594533
Fxa3Ag101611	0	5.13902	7.49148	0.0864269	0.105871
Fxa3Ag102739	587.882	1719.98	14081.9	0.086492	1.1497
Fxa4Cg202401	20.1827	64.9519	91.6592	0.086492	1.23848
Fxa5Bg100737	420.981	157.469	252.955	0.0867478	-1.05559
Fxa3Ag100246	2.43399	19.7713	10.4652	0.0867733	2.18937
Fxa3Dg200309	7.79012	74.8838	50.0256	0.08738	2.32704
Fxa2Bg203365	264.018	140.274	214.436	0.08738	-0.704535
Fxa7Ag200827	219.333	96.9659	115.065	0.0876392	-0.887816
Fxa2Cg200130	190.04	58.3758	93.0507	0.0880622	-1.24737
Fxa5Cg201317	254.825	149.03	196.864	0.0882431	-0.609631
Fxa1Ag101515	376.48	809.093	441.302	0.0882431	0.842174
Fxa3Dg201402	2721.87	1582.17	1671.44	0.0882431	-0.615303
Fxa3Dg201939	131.174	211.615	185.776	0.0882431	0.54943
Fxa2Cg200115	191.144	79.6544	112.625	0.0884933	-0.949714
Fxa1Cg100836	58.6105	18.6007	34.7092	0.0886976	-1.21911
Fxa7Cg100569	6.99889	31.1891	23.3504	0.0886976	1.55941
Fxa1Cg100780	2856.62	1305.49	1427.27	0.0888594	-0.854583
Fxa5Bg103449	34.0071	136.965	94.5048	0.0892907	1.46409
Fxa6Ag103724	72.6505	508.108	1013.89	0.0892907	1.99943
Fxa4Bg103232	139.487	76.8306	108.991	0.0895394	-0.668323
Fxa1Dg200238	6.32176	35.9893	54.1278	0.0895394	0.229696
Fxa3Cg103167	2620.74	1309.29	1514.51	0.0895394	-0.768798
Fxa6Ag100575	484.363	822.638	769.479	0.0895394	0.611179
Fxa6Bg100219	680.65	366.008	458.198	0.0895394	-0.692799
Fxa4Dg102463	395.574	719.465	688.333	0.0895394	0.673322
Fxa2Ag103814	3.47513	26.9293	14.3951	0.0898633	2.11811
Fxa4Cg201713	2018.47	1203.75	1128.6	0.0898633	-0.587942
Fxa4Ag101504	1667.61	470.717	676.776	0.090323	-1.32531
Fxa1Ag102692	18.0074	70.4691	60.4699	0.0903835	1.44082
Fxa1Cg100442	112.725	34.0483	78.2107	0.0904118	-1.26737
Fxa3Ag103182	1286.55	734.968	873.481	0.0905637	-0.629776
Fxa5Ag201422	6955.32	3594.02	6322.64	0.0905637	-0.739912
Fxa2Bg203611	36.3364	10.065	17.9338	0.0911253	-1.34518
Fxa5Dg201201	219.06	94.4191	149.458	0.0911253	-0.907748
Fxa2Ag101668	518.498	307.051	321.978	0.0912385	-0.595375
Fxa6Cg100229	229.436	110.949	143.359	0.0913333	-0.795569
Fxa2Ag101317	161.015	366.317	210.486	0.0913333	0.895814
Fxa6Dg103617	140.142	909.998	948.602	0.0913333	1.92319
Fxa1Cg100917	1274.18	708.87	892.088	0.0913333	-0.659935
Fxa2Bg202988	1726.53	852.744	1083.97	0.0917377	-0.778443
Fxa5Dg200282	11098.1	3873.23	6262.85	0.0918259	-1.11424
Fxa4Cg202072	137.539	323.155	276.127	0.0919327	0.923823
Fxa1Cg102519	32.9277	116.54	242.679	0.091983	1.32356
Fxa1Bg201753	903.911	1824.83	1616.36	0.0923162	0.77439
Fxa6Dg104231	70.364	18.6279	35.6587	0.0926285	-1.38855
Fxa3Ag100874	7.1561	39.363	20.246	0.0926285	1.75729
Fxa5Ag200988	632.657	408.97	425.468	0.0929061	-0.505837
Fxa2Dg203171	1.79413	17.8506	21.7155	0.0930427	0.148022
Fxa2Ag100761	431.418	95.3412	182.618	0.0931314	-0.255286
Fxa3Dg201833	234.059	411.067	465.098	0.0936722	0.63197
Fxa7Cg101059	0.319929	8.55205	27.5597	0.0936723	0.153445
Fxa3Cg100885	48.953	109.708	68.099	0.0938552	0.877407
Fxa6Bg100979	545.734	260.203	277.139	0.0939993	-0.806697
Fxa5Bg100807	2973.83	4992.72	4315.76	0.0942507	0.584188
Fxa2Dg202674	1.10565	14.7622	7.5561	0.0943757	2.75049
Fxa1Dg201254	5.28515	28.1039	32.7657	0.0944073	0.282782
Fxa3Cg100315	39.4359	9.23663	22.8978	0.0944073	-1.49494
Fxa3Bg200707	1849.01	978.043	1240.4	0.0944514	-0.705346
Fxa3Ag103303	811.32	249.422	324.757	0.0944514	-1.23172
Fxa5Dg201888	831.76	571.437	782.985	0.0944514	-0.445129
Fxa4Ag100101	378.062	917.871	661.793	0.0952678	0.950359
Fxa5Bg103312	347.309	89.6608	157.449	0.0952678	-1.4043
Fxa5Cg201519	142.375	240.825	190.809	0.0952678	0.59391
Fxa3Bg201493	1384.2	843.084	1106.75	0.0952678	-0.564828
Fxa2Cg202521	124.397	32.8068	59.3111	0.0952678	-1.38186
Fxa1Ag101444	0	6.46743	8.25785	0.0952861	0.0823919
Fxa5Cg201764	3139.25	2047.41	1868.23	0.0953952	-0.499034
Fxa2Cg200060	161.193	273.549	268.844	0.0953952	0.597558
Fxa4Bg102651	15.0059	43.357	72.1164	0.0954218	1.13169
Fxa7Dg102491	12.475	70.2322	32.1961	0.0954218	1.77179
Fxa2Dg202658	321.84	169.686	167.799	0.0954817	-0.704901
Fxa6Ag100346	2.80254	19.0402	9.95901	0.0955371	1.98111
Fxa1Bg202409	617.859	225.212	365.107	0.0959055	-1.06523
Fxa5Bg101673	173.036	308.916	269.719	0.096046	0.646028
Fxa2Cg202998	3435.69	1639.32	2131.8	0.0963384	-0.803922
Fxa3Ag100839	3192.71	1480.11	1749.05	0.0963384	-0.828404
Fxa2Ag103191	100.984	52.4293	68.5557	0.0967214	-0.718049
Fxa3Bg201593	5.10071	27.9137	17.8223	0.0969955	1.77098
Fxa7Dg102620	45.4808	160.325	112.078	0.0979936	1.315
Fxa1Ag101806	0	6.46611	3.77798	0.0979936	0.0812879
Fxa6Bg101441	22.2048	80.8289	77.0968	0.0980233	1.34511
Fxa3Cg103257	5.78919	24.081	12.3119	0.0980233	1.5052
Fxa4Bg102072	793.278	497.369	490.853	0.0980233	-0.534531
Fxa3Ag100209	15.5297	80.0134	38.3358	0.0982461	1.68274
Fxa5Bg103420	5.41059	25.8616	13.8301	0.0982461	1.59749
Fxa3Ag103609	2196.3	906.526	1662.98	0.0982461	-0.933585
Fxa1Bg201007	11455.2	7395.82	7763.71	0.0982972	-0.504148
Fxa5Ag201762	640.521	240.292	327.038	0.0983209	-1.03261
Fxa3Cg101261	71.1344	179.584	166.596	0.0983209	0.981931
Fxa1Dg200811	274.341	421.681	354.326	0.0986468	0.499216
Fxa3Dg200360	1913.91	906.82	1544.31	0.0986468	-0.807329
Fxa7Cg102065	2.06544	14.4821	10.0812	0.0987272	2.0064
Fxa1Bg200986	97.4675	24.8096	35.7253	0.0992113	-1.40126
Fxa4Ag101293	42.3055	118.845	178.512	0.0996527	1.08058
Fxa7Ag200302	295.89	537.838	396.669	0.0998471	0.664853
Fxa6Bg100893	197.87	48.2009	352.094	0.0998471	-1.45186
Fxa2Dg200462	8.12496	41.5234	136.267	0.100182	0.218788
Fxa2Bg201820	6773.42	18214.4	16425.8	0.100392	1.04687
Fxa7Ag203185	241.045	141.899	362.133	0.100686	-0.596794
Fxa7Cg102806	2260.6	7657.22	6607.61	0.100805	1.26697
Fxa1Cg102442	174.276	16.5789	68.8926	0.100861	-0.0899418
Fxa7Ag201713	1398.43	547.586	746.523	0.100861	-0.980833
Fxa4Dg102390	858.823	470.315	426.506	0.100861	-0.662116
Fxa7Ag202604	115.573	260.131	282.603	0.101038	0.869126
Fxa3Dg201261	243.689	87.9149	136.252	0.101465	-1.06451
Fxa1Dg201977	39.5454	139.808	140.006	0.102514	1.30845
Fxa5Dg200782	2125.48	3563.13	3041.18	0.102596	0.580041
Fxa1Bg200797	1183.43	540.818	541.361	0.103162	-0.842052
Fxa5Dg203104	8.84684	0	2.77041	1	-0.0547731
Fxa4Ag102727	5.1448	22.4938	10.0338	0.103354	1.52859
Fxa2Bg202965	124.152	573.334	559.539	0.103886	1.55426
Fxa2Dg202506	2.83528	16.9415	7.91417	0.103886	1.8346
Fxa5Dg200512	274.257	142.055	358.862	0.103886	-0.720671
Fxa7Bg202645	64.7556	22.1502	32.1428	0.103932	-1.11378
Fxa1Ag100335	1.00841	13.8857	13.9184	0.10415	0.140238
Fxa2Cg201382	40.4556	90.9592	59.4414	0.10415	0.864381
Fxa5Bg101806	317.465	144.209	251.219	0.104181	-0.844066
Fxa2Bg201904	214.151	130.746	163.006	0.104484	-0.555864
Fxa6Dg103758	347.704	92.8586	141.304	0.104566	-1.34286
Fxa2Ag100477	65.1851	298.84	122.318	0.104592	1.55141
Fxa7Dg102379	101.602	213.998	142.722	0.105106	0.800877
Fxa7Ag201715	467.816	166.018	201.615	0.105111	-1.07456
Fxa7Bg200968	111.324	218.452	226.27	0.105149	0.732138
Fxa5Dg200516	611.562	239.012	342.869	0.105333	-0.983423
Fxa7Cg101546	1421.52	529.067	1300.06	0.105333	-1.03166
Fxa2Dg201864	924.306	511.169	615.25	0.105605	-0.653409
Fxa6Cg102981	168.9	304.436	222.875	0.105605	0.651005
Fxa4Bg101901	50.2668	328.351	174.753	0.105605	1.87371
Fxa5Cg202194	1606.81	760.971	1330.2	0.106132	-0.797496
Fxa1Ag100535	376.502	160.277	284.301	0.106213	-0.901461
Fxa3Bg202425	5.72469	23.4725	243.391	0.106213	1.45747
Fxa5Cg202701	113.628	1351.59	750.502	0.106213	2.39591
Fxa6Cg100423	0	4.54223	27.9458	0.106216	0.103742
Fxa6Bg100980	889.203	139.431	299.642	0.106432	-0.134035
Fxa2Ag103665	349.017	506.045	413.616	0.107367	0.4387
Fxa5Cg200284	0	9.03313	9.83113	0.107501	0.0595989
Fxa2Cg201422	62.7433	174.502	109.117	0.107542	1.06085
Fxa5Ag201001	19.9063	4.36614	16.0756	0.108493	-1.54197
Fxa3Ag100875	0.639858	14.0931	5.44222	0.108493	3.19521
Fxa4Dg102686	307.093	689.669	1317.73	0.10853	0.85662
Fxa5Ag201607	427.244	1093.54	1043.34	0.109221	0.982526
Fxa6Dg100241	2459.81	1485.3	1596.9	0.109221	-0.573425
Fxa2Cg200219	55.6291	107.661	89.0574	0.109221	0.715875
Fxa1Ag101903	0	5.70725	4.24575	0.109221	0.0851984
Fxa5Bg100631	404.436	200.053	215.267	0.109221	-0.755768
Fxa2Bg201536	91.6679	29.3718	60.9334	0.109248	-1.16258
Fxa3Cg102756	3.02522	23.0583	11.6155	0.109545	2.02532
Fxa2Ag103415	391.555	185.321	434.386	0.109831	-0.802546
Fxa3Bg200466	27.2322	76.295	77.9089	0.110018	1.06319
Fxa7Cg102406	2118.39	1226.41	1600.6	0.11053	-0.604233
Fxa4Cg202313	1669.56	996.304	963.864	0.11063	-0.576755
Fxa6Cg103972	454.926	214.782	305.722	0.110728	-0.798642
Fxa4Dg101563	1015.09	516.997	721.354	0.110831	-0.730742
Fxa7Ag202434	5.71917	21.4417	18.5503	0.110844	1.34429
Fxa5Cg200295	6.05045	30.4817	27.1578	0.110885	1.61037
Fxa3Bg201989	107.741	23.5946	41.218	0.111388	-0.22155
Fxa6Ag103749	265.376	479.105	320.917	0.111423	0.650839
Fxa2Cg200474	175.91	89.3006	119.425	0.111636	-0.728205
Fxa5Ag203363	5.07932	26.2972	11.2637	0.111636	1.65835
Fxa6Cg103032	660.161	1983.44	1026.32	0.111952	1.14458
Fxa2Bg201476	456.085	257.822	280.51	0.112036	-0.628693
Fxa6Bg100910	462.817	176.673	306.349	0.112036	-0.997368
Fxa6Dg101645	178.839	87.6704	120.907	0.112232	-0.758615
Fxa4Dg101623	2.28812	23.0252	16.0438	0.112307	0.122291
Fxa4Cg200580	171.008	754.326	2652.61	0.112307	1.48124
Fxa5Dg202887	46.5933	117.874	74.4134	0.112307	0.966225
Fxa4Bg100323	1.63692	21.1482	7.16668	0.112307	2.59993
Fxa4Cg202850	25.7502	73.0514	86.8381	0.112307	1.07227
Fxa6Ag101082	924.409	324.061	461.884	0.112307	-1.07334
Fxa4Ag103024	1080.94	540.007	871.714	0.112552	-0.747833
Fxa3Ag104188	45.6461	187.263	138.969	0.11257	1.41655
Fxa6Ag103303	109.607	171.711	144.307	0.112603	0.514224
Fxa6Dg101618	257.293	90.8209	159.229	0.112603	-1.06591
Fxa3Dg200294	29.3158	4.63746	15.3988	0.112603	-0.158366
Fxa7Dg101199	14.0996	51.6161	38.8281	0.112603	1.31147
Fxa5Bg101570	336.099	930.338	942.002	0.112603	1.0494
Fxa3Dg203700	54.0946	13.1111	25.2448	0.112603	-1.411
Fxa6Cg100085	461.571	2435.31	3948.64	0.112676	1.64474
Fxa4Bg100204	3.99506	33.176	370.317	0.112676	0.117808
Fxa6Ag103489	174.771	87.7429	89.2616	0.11289	-0.736151
Fxa2Cg200261	169.268	323.597	236.877	0.113043	0.703125
Fxa7Cg102807	6.71073	33.6999	25.9469	0.113227	1.60432
Fxa6Cg101038	46.2033	15.5435	18.5924	0.113227	-1.10937
Fxa3Ag101870	12.2079	2.16533	49.8421	0.113227	-1.75851
Fxa6Ag103695	165.759	433.458	302.514	0.113292	0.993959
Fxa6Dg100883	17.5475	66.6912	35.2628	0.113292	1.34784
Fxa6Cg103672	5.925	20.5904	24.8394	0.113742	1.24808
Fxa6Cg101158	44.7635	168.665	114.177	0.114042	1.33358
Fxa3Dg201213	2043	1166.15	1267.03	0.114042	-0.606056
Fxa6Ag101515	723.973	135.696	247.011	0.114045	-0.160088
Fxa5Bg102324	191.177	70.9671	114.301	0.114045	-1.01915
Fxa6Bg103378	21.3578	2.77614	7.86261	0.114045	-0.138994
Fxa7Cg102470	119.185	223.722	229.388	0.114045	0.680956
Fxa6Bg103099	24.9269	80.0823	35.3649	0.114045	1.19308
Fxa6Bg101058	352.332	136.704	191.73	0.114045	-0.975582
Fxa4Bg101758	153.729	59.083	97.4781	0.114163	-0.984788
Fxa6Ag101083	2477.88	423.31	869.203	0.114163	-0.142657
Fxa2Dg202340	218.83	106.087	146.465	0.114324	-0.769323
Fxa7Bg200040	1052.88	553.942	822.305	0.114324	-0.692427
Fxa2Bg200406	359.88	990.5	655.938	0.114625	1.04391
Fxa5Ag201525	3530.09	1276.8	1721.89	0.114676	-1.03848
Fxa6Cg100254	2647.66	588.549	1075.38	0.114696	-0.223963
Fxa7Dg101391	4.77073	30.7981	36.4845	0.114821	0.163322
Fxa2Ag102184	1.27972	39.0749	14.1487	0.115026	0.0564555
Fxa1Ag101373	1458.33	2660.07	2899.08	0.115538	0.656703
Fxa4Ag100212	22.7182	47.0161	42.7796	0.115538	0.784267
Fxa1Ag101262	170.554	54.6563	72.1344	0.115538	-1.14477
Fxa6Bg100029	1408.98	2917.09	2846.98	0.115538	0.772036
Fxa7Bg200617	89.361	26.2338	61.0522	0.115538	-1.23177
Fxa3Ag101642	63.354	246.159	209.37	0.115538	1.35362
Fxa4Ag101755	114.594	20.1885	47.3527	0.115538	-0.153245
Fxa2Cg202844	1358.04	669.985	773.234	0.115538	-0.754177
Fxa3Ag103615	380.801	149.851	189.557	0.115538	-0.959337
Fxa1Dg201656	362.947	194.261	248.063	0.115579	-0.67669
Fxa6Cg103755	1984.64	1154.59	1404.45	0.115669	-0.597295
Fxa1Dg200115	41.9797	110.663	114.081	0.115669	0.994904
Fxa6Ag103946	231.387	956.733	394.645	0.115669	1.42156
Fxa5Bg100048	356.649	693.914	423.511	0.115696	0.716099
Fxa1Bg201853	18656.4	3525.34	8385.21	0.115696	-0.158771
Fxa2Cg201308	5256.99	2287.53	3719.35	0.115712	-0.870225
Fxa7Dg101985	107.773	266.631	283.109	0.115799	0.93742
Fxa2Cg202737	12.1097	1.93229	16.2996	0.115821	-0.217977
Fxa3Dg200305	166.249	35.0296	62.0759	0.115839	-0.191976
Fxa3Ag101332	380.476	189.065	264.406	0.115905	-0.742721
Fxa4Ag102326	15.8833	42.7281	23.3871	0.115923	1.02203
Fxa6Dg100129	54.6586	20.9641	34.0535	0.115923	-0.982379
Fxa7Ag201772	1018.75	310.617	394.869	0.116148	-1.19356
Fxa2Cg200016	43.3356	117.15	59.1545	0.116157	1.02429
Fxa3Dg202577	243.118	90.4105	162.064	0.116262	-1.01788
Fxa3Ag103588	766.508	147.06	267.345	0.116262	-0.163186
Fxa3Ag103965	98.8445	36.4105	51.8976	0.116262	-1.01667
Fxa5Ag201794	1030.7	450.908	443.666	0.116262	-0.859595
Fxa1Cg101083	14.0302	37.2378	21.1103	0.116273	1.01711
Fxa6Ag103112	68.0132	198.251	138.046	0.116366	1.08794
Fxa2Cg200842	458.994	199.993	289.683	0.116617	-0.865003
Fxa1Ag100651	2.48261	14.3045	17.527	0.116617	1.74912
Fxa1Dg201700	1.10565	14.8416	5.96424	0.11666	2.64308
Fxa1Ag101513	270.015	650.326	330.815	0.116848	0.910977
Fxa4Bg100926	3.17109	27.222	20.0823	0.116857	0.123862
Fxa1Ag100670	190.271	393.153	372.947	0.117376	0.769997
Fxa3Cg101421	57.2637	223.395	1725.53	0.117602	1.34806
Fxa7Ag201645	2131.56	567.591	1137.76	0.117842	-1.30509
Fxa5Bg101376	11.1466	36.3379	50.2747	0.117893	1.17629
Fxa4Dg100124	1.05703	12.1295	9.30127	0.118263	0.153855
Fxa3Ag101644	7.29062	57.3409	66.6954	0.118422	0.115284
Fxa5Ag202031	44.31	109.731	48.2246	0.11865	0.943544
Fxa3Ag101031	52.3614	144.193	104.942	0.118797	1.02792
Fxa5Ag200589	2.11406	14.087	10.6071	0.118889	0.217581
Fxa2Dg201784	14.143	0.933467	10.9893	0.118932	-0.101917
Fxa7Bg201574	5.46375	0	2.55276	1	-0.0718713
Fxa2Ag103988	116.386	51.0269	74.3339	0.11904	-0.851698
Fxa2Dg200739	27.793	55.4794	50.2684	0.11904	0.734794
Fxa2Dg202357	17.7643	52.0061	134.795	0.119434	1.09222
Fxa5Bg100662	558.37	200.506	356.638	0.119434	-1.03331
Fxa5Cg200688	5668.26	3590.73	4339.25	0.119434	-0.513059
Fxa3Cg103227	4230.19	1594.17	2575.73	0.119434	-0.991128
Fxa5Bg101480	25.3927	116.131	43.5032	0.119434	1.5
Fxa1Ag101898	32.0684	103.557	141.763	0.119834	1.17053
Fxa6Ag103499	31.2999	5.67457	12.2878	0.119984	-1.66639
Fxa1Bg200136	41.1772	10.3873	17.07	0.120078	-1.35062
Fxa7Dg100667	3338.55	2263.41	2728.28	0.120085	-0.448531
Fxa2Bg201915	1507	732.178	897.248	0.120189	-0.760473
Fxa3Cg102647	1734.56	1101.06	1225.57	0.120189	-0.512152
Fxa7Dg102084	99.3886	254.834	175.777	0.12028	0.963406
Fxa6Ag101560	324.512	215.034	263.979	0.120403	-0.46819
Fxa6Cg100532	91.9678	514.031	536.561	0.120585	1.65508
Fxa3Bg200288	0	4.85928	2.64092	1	0.089952
Fxa3Ag103728	49.0541	100.188	85.4879	0.121557	0.751478
Fxa3Dg203630	2059.41	317.56	665.268	0.121783	-0.124733
Fxa3Ag102108	877.145	509.577	491.758	0.121783	-0.59223
Fxa2Bg200423	700.797	406.256	564.494	0.121813	-0.597307
Fxa3Ag100303	20.9526	65.1506	54.5722	0.121813	1.1177
Fxa3Dg201294	29.1155	12.1948	28.4141	0.12214	-0.898963
Fxa6Ag102400	40.4313	231.581	539.973	0.12214	0.144512
Fxa3Ag100694	1.32834	18.4869	12.0049	0.12214	0.102455
Fxa7Dg102351	0.639858	9.20528	16.5384	0.122197	0.245708
Fxa6Cg101150	565.727	302.606	392.077	0.122197	-0.671146
Fxa6Bg103047	147.228	70.0526	118.773	0.122197	-0.776596
Fxa5Cg203179	321.856	94.3338	166.037	0.122595	-1.20448
Fxa4Ag102703	330.99	141.422	142.596	0.122821	-0.872037
Fxa6Ag100930	313.923	160.366	207.309	0.122882	-0.711312
Fxa1Dg200564	256.184	100.551	129.209	0.123011	-0.948637
Fxa4Ag100362	6.5049	29.5379	33.4516	0.123617	0.273882
Fxa6Bg101802	3.25245	17.7486	11.1866	0.12397	1.67989
Fxa6Ag103110	0	4.39601	7.8761	0.124314	0.0964404
Fxa2Cg201188	87.8472	547.496	257.83	0.124702	1.73976
Fxa1Bg202192	92.4997	181.749	205.079	0.124702	0.716881
Fxa2Dg202104	674.136	273.884	427.703	0.124838	-0.914823
Fxa5Cg200108	1612.24	5020.26	6552.32	0.125137	1.13091
Fxa6Ag105046	35.1231	88.8317	80.1685	0.125247	0.940431
Fxa3Dg201873	1.27972	11.0839	10.1122	0.125353	0.21432
Fxa4Ag100250	525.262	1199.83	5047.11	0.125668	0.8517
Fxa2Ag103943	71.0229	163.026	168.927	0.126092	0.851561
Fxa3Ag100552	190.206	1052.71	7992.64	0.127279	0.144133
Fxa2Cg201805	48.7812	16.2835	43.0722	0.127279	-1.1016
Fxa7Dg102309	2492.18	852.02	1047.4	0.1278	-1.06093
Fxa5Bg100866	7.66014	32.9691	19.2863	0.1278	1.4225
Fxa4Cg203063	30.1453	9.69561	18.6017	0.1278	-1.12826
Fxa4Bg102233	202.5	60.8513	77.8158	0.127801	-1.17395
Fxa7Dg102090	2756.98	1315.21	1330.87	0.127801	-0.769077
Fxa1Dg200489	42.475	9.07885	14.8116	0.127801	-0.207146
Fxa5Ag202783	859.813	529.82	551.034	0.127801	-0.535469
Fxa3Ag103525	1384.22	3331.57	2264.36	0.127801	0.898602
Fxa6Bg100249	5109.3	1154.77	2108.8	0.127801	-0.198236
Fxa6Bg104318	105.177	296.541	437.191	0.127801	1.03559
Fxa6Cg100525	5705.86	2475.14	3432.48	0.127801	-0.854216
Fxa4Dg101879	221.19	354.791	275.623	0.127801	0.525886
Fxa7Ag200202	30.3138	65.9409	45.4592	0.127801	0.809601
Fxa7Ag201212	13236.4	6305.66	8352.19	0.127801	-0.767481
Fxa1Dg202556	78.778	21.4535	45.3032	0.127801	-1.26374
Fxa2Cg202050	63.3054	281.066	117.565	0.127801	1.44255
Fxa4Cg202130	328.806	716.586	534.084	0.127801	0.806683
Fxa1Cg100438	1446.92	561.96	1180.22	0.127801	-0.947428
Fxa7Bg201667	745.717	444.51	549.207	0.127801	-0.563171
Fxa4Cg200240	26.6128	92.3941	167.222	0.127801	1.21251
Fxa3Bg203556	132.806	56.2214	65.763	0.127801	-0.871611
Fxa1Dg200251	541.919	304.638	305.457	0.127801	-0.619935
Fxa7Dg101987	191.228	59.2912	134.182	0.127801	-1.14104
Fxa5Ag200153	13.3375	52.562	21.7706	0.127801	1.33186
Fxa2Dg202704	699.405	1208.6	1159.32	0.127801	0.595553
Fxa3Bg203194	2360.43	888.239	1237.11	0.127801	-0.971051
Fxa2Bg203207	1451.2	595.805	1171.58	0.127978	-0.901573
Fxa3Cg101899	466.322	101.523	208.126	0.128299	-0.185462
Fxa5Cg200736	13.8509	73.8058	41.3249	0.128542	1.58948
Fxa1Ag102780	122.961	45.3997	91.7165	0.128748	-0.989853
Fxa5Dg200595	5231.63	2347.19	2706.28	0.129059	-0.819895
Fxa1Dg202946	7.96873	22.5395	14.6623	0.129171	1.06072
Fxa7Cg101588	265.018	31.0633	77.4926	0.129171	-0.0949473
Fxa3Cg100677	1.69689	11.7344	18.9365	0.129171	0.240256
Fxa6Ag102649	43.1113	191.816	370.036	0.129171	0.201287
Fxa5Dg201362	22.6868	5.19596	14.6879	0.129171	-0.292672
Fxa3Cg103170	1358.7	776.362	833.241	0.129297	-0.603968
Fxa2Ag100242	5.62647	26.7743	88.9942	0.129734	0.221807
Fxa3Ag101891	2.33674	24.5977	72.7269	0.129856	0.104775
Fxa6Ag102821	124.294	49.9058	63.8316	0.129868	-0.914974
Fxa6Dg104401	5.72469	20.2933	17.5994	0.130037	1.26525
Fxa2Cg201849	91.1376	209.516	118.552	0.13004	0.855565
Fxa2Ag103325	55.9727	112.759	97.3246	0.13004	0.728655
Fxa7Ag202661	4.26637	18.6548	14.0969	0.13004	1.46667
Fxa6Cg101674	24.2478	5.71617	11.4006	0.13004	-1.39841
Fxa4Cg200135	31.3595	9.43138	12.8439	0.13004	-1.17113
Fxa7Dg102324	383.357	1074.33	952.622	0.13004	1.02345
Fxa3Dg200388	202.574	64.8194	95.4171	0.130563	-1.10814
Fxa6Ag104186	85.902	229.456	128.907	0.130563	0.983407
Fxa2Dg202546	3.33381	19.6323	9.38682	0.130566	1.72607
Fxa3Bg200617	1403.27	635.51	852.583	0.131227	-0.810283
Fxa3Ag103092	467.226	663.939	624.122	0.131652	0.408932
Fxa2Dg201963	221.099	480.348	256.919	0.13166	0.80041
Fxa5Cg201230	2992.72	1713.71	1909.97	0.131821	-0.595335
Fxa1Bg201446	60.9739	169.405	122.354	0.132082	1.01138
Fxa5Dg200388	439.897	153.716	366.222	0.132231	-1.03484
Fxa3Bg202072	953.412	516.374	744.5	0.132487	-0.651751
Fxa6Cg101321	520.159	101.468	175.087	0.132553	-0.15462
Fxa7Cg101502	5912.16	3528.21	3250.17	0.132624	-0.561487
Fxa3Bg202874	1846.94	941.225	1212.06	0.132624	-0.703628
Fxa2Dg202685	36.7588	70.3701	48.9412	0.132775	0.689109
Fxa2Cg201103	112.595	479.467	284.659	0.132941	1.37919
Fxa4Bg103353	210.34	343.159	275.553	0.133024	0.5392
Fxa3Dg201586	61.4633	25.4777	48.5604	0.133425	-0.880898
Fxa3Dg200692	1.74551	21.0145	8.40383	0.133552	2.35092
Fxa3Bg202427	71.5571	180.507	1773.36	0.133552	0.93233
Fxa3Bg202050	174.307	91.8354	98.8288	0.133552	-0.673277
Fxa3Cg101448	523.842	2297.65	1860.32	0.133552	1.40271
Fxa3Bg203825	1129.12	160.867	362.205	0.133552	-0.108923
Fxa3Cg100671	372.142	108.614	139.508	0.133624	-1.18176
Fxa7Ag201170	753.405	451.529	560.787	0.134031	-0.558852
Fxa3Ag100981	314.344	910.055	1304.07	0.134031	1.04267
Fxa3Bg200679	45.5414	16.808	43.6815	0.134031	-0.99209
Fxa3Cg102169	191.114	96.9117	122.227	0.134741	-0.706769
Fxa2Bg200639	29.2675	72.765	59.4124	0.134766	0.907439
Fxa5Bg100810	132.393	361.407	258.863	0.135096	0.992209
Fxa4Cg201863	40.8018	108.724	58.5539	0.135096	0.976281
Fxa6Dg100363	1971.98	1126.71	1218.68	0.135422	-0.600955
Fxa5Bg103488	68.5513	445.616	1624.57	0.135422	0.118468
Fxa3Ag100055	254.867	166.597	190.447	0.135422	-0.475675
Fxa1Cg100719	11.6724	58.8416	250.656	0.135508	0.177023
Fxa1Ag101304	699.754	295.282	480.172	0.135515	-0.866085
Fxa7Ag202374	110.372	277.581	193.551	0.13561	0.921673
Fxa1Bg200247	576.7	232.177	334.639	0.135772	-0.905197
Fxa5Bg100390	1827.79	871.801	1049.08	0.135772	-0.753765
Fxa6Ag101584	194.382	434.086	354.618	0.135822	0.816195
Fxa3Cg100135	74.3081	134.508	104.257	0.135822	0.632295
Fxa1Ag101529	0	7.5486	4.14144	0.136416	0.0592743
Fxa2Ag102706	822.193	1992.1	2463.18	0.136434	0.885726
Fxa5Bg102349	545.294	321.794	344.126	0.136529	-0.570061
Fxa4Dg101573	2238.05	1123.07	1333.98	0.136529	-0.715797
Fxa4Bg102455	20.2443	93.4055	69.1318	0.136601	1.43602
Fxa6Dg102693	41.2993	122.82	60.7989	0.136617	1.06598
Fxa6Cg102499	0.36855	9.42114	21.4078	0.136627	0.0935361
Fxa1Cg100758	1421.22	390.165	511.536	0.136627	-1.21711
Fxa6Dg101160	44.6659	131.925	172.164	0.136659	1.05368
Fxa5Cg200281	4484.35	1109.26	1966.08	0.136684	-0.219622
Fxa5Ag200591	26.4825	61.3208	56.5069	0.136764	0.853732
Fxa5Dg201916	38.4015	89.2698	42.1989	0.136791	0.853071
Fxa1Ag102513	365.432	519.966	491.671	0.136791	0.410721
Fxa3Cg100753	11971.1	5002.82	6721.73	0.136944	-0.870239
Fxa2Bg200811	114.85	51.0167	91.8629	0.137161	-0.820937
Fxa6Bg101351	432.421	94.591	157.202	0.137191	-0.176921
Fxa4Dg101972	752.392	2718.24	1867.75	0.137268	1.23944
Fxa5Ag203258	92.8481	27.9994	46.1104	0.137268	-1.14514
Fxa6Bg103062	260.467	149.469	254.201	0.137268	-0.596195
Fxa7Cg101685	18.3014	5.23144	8.58568	0.137377	-1.2228
Fxa1Cg102451	458.312	252.03	302.814	0.13765	-0.632882
Fxa2Bg201677	127.969	318.154	219.945	0.13765	0.904715
Fxa6Dg103915	0.36855	9.62282	8.64632	0.137691	0.0917134
Fxa7Dg101223	1526.85	843.563	898.045	0.137691	-0.629339
Fxa5Bg102136	240.779	64.8331	140.735	0.137691	-0.302567
Fxa3Dg200880	97.1942	194.886	147.684	0.137691	0.716797
Fxa6Cg101604	10.7496	0.96895	3.90576	0.137815	-0.126375
Fxa5Bg100491	69.9516	149.422	90.1551	0.137937	0.774583
Fxa4Ag101287	1924.62	816.494	2475.41	0.13803	-0.857153
Fxa5Ag201602	0	6.78694	2.82547	1	0.0640791
Fxa3Ag102968	1.74551	12.229	6.79312	0.138052	1.88965
Fxa7Ag201756	612.393	193.181	227.558	0.138334	-1.09994
Fxa5Bg103514	200.662	312.345	336.125	0.138334	0.492623
Fxa3Dg200823	279.837	663.005	860.648	0.138334	0.861542
Fxa7Dg102730	59.2708	10.8575	28.0319	0.138334	-0.148951
Fxa5Dg200332	52.0194	16.9075	21.7342	0.138334	-1.07661
Fxa1Bg201281	0.319929	8.14242	6.53422	0.138367	0.113032
Fxa5Cg200653	18.4755	3.7096	6.55657	0.138367	-0.204827
Fxa7Ag201436	42.0041	95.9045	57.7174	0.138367	0.832826
Fxa6Cg100736	520.303	180.551	236.222	0.138367	-1.02204
Fxa7Dg101928	655.765	276.118	395.754	0.13858	-0.869101
Fxa5Cg200788	24.7678	68.8844	45.2794	0.138637	1.00357
Fxa4Cg201792	402.198	213.188	223.738	0.138637	-0.662798
Fxa7Dg101972	501.804	271.082	277.408	0.138637	-0.646888
Fxa1Dg202553	2.16268	12.8084	9.90203	0.138714	0.22583
Fxa4Cg201671	1302.68	3647.13	2682.44	0.138714	1.00913
Fxa6Bg104039	29.344	61.6382	121.975	0.138714	0.755642
Fxa5Cg200280	3003.62	983.052	1773.12	0.138853	-1.07201
Fxa4Dg101673	1542.79	931.031	974.544	0.138853	-0.548604
Fxa4Ag101890	174.938	792.639	553.274	0.138901	1.40403
Fxa1Bg201285	0.36855	7.99768	6.8334	0.139511	0.113439
Fxa6Bg100959	52.8547	103.385	81.2604	0.139568	0.694115
Fxa3Bg201404	719.152	485.946	614.016	0.139568	-0.444791
Fxa7Ag203169	16.1546	57.9572	39.4044	0.139568	1.21596
Fxa1Dg202295	80.215	160.64	111.624	0.139598	0.719534
Fxa6Ag102884	236.398	37.5821	108.805	0.139898	-0.120243
Fxa5Bg101185	48.8911	11.6929	27.6306	0.140041	-0.22865
Fxa3Dg203047	879.642	1754.98	1198.37	0.14013	0.713215
Fxa4Cg201666	649.387	340.615	451.326	0.140138	-0.671837
Fxa6Bg104560	0	5.30802	2.64562	1	0.0761351
Fxa6Ag101733	28.5064	90.3545	54.2599	0.140381	1.10954
Fxa2Ag100389	487.375	130.851	267.32	0.140816	-0.268327
Fxa7Ag201545	1723.93	1091.33	1053.92	0.14087	-0.505127
Fxa7Cg102372	6.22322	37.5916	20.0039	0.14099	1.64521
Fxa6Cg100414	1921.11	1090.6	1157.5	0.14099	-0.602848
Fxa2Dg202073	14.6263	68.2702	269.388	0.14099	0.18502
Fxa6Dg104338	168.093	305.508	254.298	0.141011	0.62986
Fxa5Cg203038	40.3921	13.9381	19.572	0.141011	-1.02684
Fxa2Bg200563	569.186	299.918	414.966	0.141069	-0.668928
Fxa7Bg201781	2.48261	15.0546	8.44585	0.141116	1.71414
Fxa6Ag100543	512.325	1076.8	597.355	0.141323	0.758397
Fxa6Bg101139	307.493	176.342	246.25	0.141408	-0.591107
Fxa4Cg201575	4.4508	0	3.10734	0.141408	-0.0748735
Fxa6Ag105135	1510.95	957.248	1193.44	0.141408	-0.501933
Fxa5Cg200172	0.319929	7.41211	7.65684	0.141408	0.125235
Fxa4Cg201893	76.1911	27.0738	61.0328	0.141408	-0.99865
Fxa1Cg101128	22.5513	63.7418	43.2671	0.141408	1.00245
Fxa1Bg200427	13.8555	42.8844	28.8726	0.142041	1.08072
Fxa5Dg203230	0.319929	10.7892	27.3077	0.142041	0.0795108
Fxa2Cg202636	4329.81	1646.04	2378.87	0.142041	-0.938153
Fxa6Cg102529	106.207	358.8	349.991	0.142041	1.14819
Fxa2Dg200589	619.417	374.718	485.674	0.142041	-0.543916
Fxa6Dg103241	19.0139	89.3299	190.924	0.142193	0.179493
Fxa6Bg104049	14.8049	60.6546	34.437	0.142201	1.31112
Fxa5Ag200463	102.04	54.1114	65.0682	0.142314	-0.65772
Fxa4Dg101979	483.243	160.873	301.208	0.142606	-1.04655
Fxa4Dg101342	24.7827	5.429	10.8871	0.143157	-0.215442
Fxa3Cg102190	128.423	332.872	211.917	0.143626	0.930298
Fxa5Ag200613	2227.58	1198.1	1787.51	0.14374	-0.646326
Fxa3Cg102058	704.321	48.5162	206.479	0.14374	-0.0616385
Fxa6Bg100205	35.0567	144.876	698.696	0.14374	0.210804
Fxa6Cg100803	0.36855	8.52877	22.2717	0.14374	0.100338
Fxa6Ag105100	30.1245	183.443	245.193	0.1439	0.12461
Fxa3Cg100070	1882.28	996.938	1636.26	0.143951	-0.661994
Fxa3Dg202971	20.8816	100.883	46.3788	0.143993	1.42945
Fxa6Dg104111	2.11957	19.2844	6.62002	0.144682	2.06228
Fxa1Cg100274	38.5801	11.8665	27.7968	0.144682	-1.12879
Fxa7Ag201526	2383.19	1120.65	1508.82	0.144717	-0.759065
Fxa3Cg100330	52.0252	161.842	206.218	0.144717	1.07388
Fxa6Bg101740	183.593	96.894	126.446	0.144717	-0.658836
Fxa7Cg101282	62.2889	25.6594	31.1152	0.144897	-0.869085
Fxa6Cg101623	0	6.47304	2.64024	1	0.0644348
Fxa3Ag101643	0.319929	8.7831	7.72065	0.144902	0.0982804
Fxa4Cg202414	52.0804	19.0999	31.7226	0.144902	-0.96249
Fxa4Bg103204	53.2641	126.446	104.168	0.144902	0.850822
Fxa6Cg101099	325.981	171.399	267.335	0.144902	-0.664482
Fxa6Dg100722	438.39	234.083	291.886	0.144921	-0.653985
Fxa2Bg203268	42.6021	87.8779	66.9524	0.144921	0.740813
Fxa1Dg200690	649.079	191.093	239.568	0.144923	-1.13112
Fxa1Bg201192	70.1043	30.5197	52.1345	0.144923	-0.823987
Fxa2Ag103410	1915.67	715.871	1767.03	0.144923	-0.948576
Fxa1Dg200858	22.9088	2.39836	7.19524	0.144923	-0.100158
Fxa6Dg100011	0	5.37949	11.9278	0.144923	0.0728957
Fxa6Ag104214	7.94182	29.7668	19.4483	0.144923	1.23001
Fxa2Cg202489	390.294	258.179	283.373	0.144923	-0.461558
Fxa5Bg102991	571.38	308.928	346.264	0.145134	-0.636786
Fxa7Ag202636	27.4957	8.94517	18.5068	0.145139	-1.08837
Fxa5Ag203430	0	5.44715	8.35178	0.145169	0.0726264
Fxa5Dg200028	2416.2	1292.2	1566.51	0.145169	-0.650072
Fxa5Bg100276	181.823	506.907	281.389	0.145227	0.988538
Fxa6Cg101031	203.476	103.235	125.092	0.145264	-0.693007
Fxa7Bg202438	52.197	100.738	67.9906	0.145727	0.674683
Fxa1Dg200653	181.408	81.2006	124.367	0.145751	-0.798431
Fxa3Ag103580	327.6	140.715	172.279	0.145792	-0.828993
Fxa3Bg203005	216.445	121.214	129.1	0.145831	-0.608787
Fxa2Bg200978	386.434	217.819	282.295	0.145954	-0.603184
Fxa3Dg202135	282.596	177.527	239.479	0.145954	-0.508819
Fxa5Dg200705	1084.83	693.655	758.566	0.145975	-0.493136
Fxa5Cg202950	190.321	81.7726	108.108	0.146242	-0.830041
Fxa2Cg202948	0	6.5412	7.34672	0.1463	0.0628939
Fxa7Ag202760	119.736	31.236	48.0133	0.146459	-0.242596
Fxa4Ag100004	14.3099	44.7587	37.4128	0.146655	1.08025
Fxa3Cg100468	21.6793	52.5024	35.0169	0.14673	0.863614
Fxa6Dg100794	162.518	48.1772	234.156	0.146736	-1.12568
Fxa1Dg200401	2622.42	995.627	1213.53	0.147189	-0.927471
Fxa1Bg200914	57.3111	14.6993	29.1847	0.147321	-0.248645
Fxa7Dg100745	1051	458.462	564.596	0.147546	-0.815759
Fxa1Dg200954	10345.7	7077.44	7152.48	0.147568	-0.431247
Fxa4Cg202953	36.162	77.2487	59.9098	0.147683	0.761354
Fxa2Dg203389	28.1641	138.474	64.735	0.147683	1.41937
Fxa5Cg202153	369.153	769.166	1293.83	0.148106	0.737386
Fxa2Dg200956	263.832	162.216	201.824	0.148147	-0.528846
Fxa7Dg100499	94.7447	32.1315	66.7252	0.148147	-1.02153
Fxa3Ag104136	17.777	50.3131	38.0102	0.148245	0.985474
Fxa6Ag105088	2.01682	17.5193	29.2748	0.148486	0.124004
Fxa6Dg101353	164.925	93.5	147.487	0.148486	-0.596401
Fxa2Cg202071	86.8881	148.491	111.222	0.148623	0.568205
Fxa3Ag102396	17.8243	44.5686	32.0896	0.148638	0.892195
Fxa5Dg202271	170.721	74.538	85.8334	0.148984	-0.81202
Fxa6Bg103074	20.431	62.278	365.988	0.149022	1.05066
Fxa4Cg201587	61.6289	188.633	173.125	0.149022	1.04795
Fxa2Cg203528	144.204	79.0737	110.707	0.149022	-0.62359
Fxa7Bg200505	2978.51	1623.94	1590.48	0.14909	-0.629617
Fxa1Dg201446	235.418	92.2904	155.509	0.149153	-0.899127
Fxa4Bg100491	282.185	1092.38	1032.37	0.149239	1.22752
Fxa7Ag200351	968.785	2492.47	3089.43	0.149282	0.91096
Fxa4Dg102413	100.403	31.3139	119.402	0.149429	-1.0776
Fxa7Dg102008	6.79209	25.0607	21.6055	0.149529	1.21238
Fxa1Dg200860	116.975	39.3231	55.1273	0.149674	-1.01758
Fxa5Cg200385	827.508	395.32	745.84	0.149674	-0.733508
Fxa5Bg103531	2743.02	1388.49	1751.05	0.149694	-0.68279
Fxa3Cg102601	26.6491	74.1593	37.3238	0.149694	0.977078
Fxa7Cg101267	282.237	128.084	152.632	0.149694	-0.782626
Fxa2Ag102559	1160.08	778.852	1019.12	0.150059	-0.446728
Fxa6Bg100688	1.32834	9.9128	6.75932	0.150088	0.216431
Fxa2Ag100192	10.8364	0.632269	5.61401	0.150781	-0.0993702
Fxa6Bg103751	9.42705	57.8203	17.0555	0.150846	1.59966
Fxa6Dg100870	0.36855	7.51724	4.98584	0.151113	0.112999
Fxa5Bg100168	248.492	126.573	153.038	0.151113	-0.68397
Fxa6Ag100232	452.578	291.838	381.98	0.151113	-0.483515
Fxa7Ag200094	1318.76	573.853	939.766	0.151113	-0.812683
Fxa1Cg100911	3.01388	18.1325	9.29253	0.151113	1.6504
Fxa3Ag101901	880.586	2562.23	1728.26	0.151113	1.02223
Fxa2Ag101314	1814.79	1207.19	1420.27	0.151113	-0.455391
Fxa5Cg201572	255.085	741.581	345.1	0.151287	1.01263
Fxa1Bg200009	73.5036	285.929	191.274	0.151301	1.21672
Fxa4Dg101798	160.704	967.276	1348.39	0.151714	1.46581
Fxa4Dg101093	304.417	195.582	244.115	0.152103	-0.48618
Fxa7Bg201602	6824.48	3322.48	3781.1	0.152103	-0.719928
Fxa3Cg102924	30.7401	97.0127	155.248	0.152103	1.06392
Fxa3Bg200684	85.9549	32.5751	73.9475	0.152103	-0.926729
Fxa1Ag102715	695.201	265.433	440.215	0.152103	-0.914147
Fxa2Bg202039	47.5978	99.1951	64.7677	0.152103	0.736093
Fxa5Dg201993	595.5	365.003	340.688	0.152662	-0.525606
Fxa6Dg100724	1.05703	11.1773	4.59476	0.152692	2.25096
Fxa2Ag101788	1.00841	11.4472	31.7035	0.153126	0.13129
Fxa6Ag102159	97.3501	170.451	136.837	0.153851	0.588393
Fxa6Dg101720	78.1476	289.946	377.348	0.153851	1.177
Fxa7Bg200196	54.1017	103.708	83.7879	0.153851	0.661814
Fxa2Cg200073	622.884	266.963	374.534	0.153865	-0.820569
Fxa3Dg202080	9.88376	30.8529	40.1926	0.153996	1.05765
Fxa6Ag100460	1845.58	862.714	1547.14	0.154111	-0.736143
Fxa3Dg200730	126.616	30.6375	47.0901	0.154111	-0.195512
Fxa6Ag100423	22.5373	82.4326	160.613	0.154111	0.287532
Fxa3Ag101943	12411.8	4398.47	5156.45	0.15419	-0.960934
Fxa1Bg201642	20.4972	88.3849	43.1495	0.154265	1.29234
Fxa2Ag103895	417.21	234.545	332.438	0.154265	-0.599144
Fxa4Ag102995	347.08	113.091	149.491	0.154404	-1.02569
Fxa2Cg203450	211.951	416.58	463.38	0.154404	0.687549
Fxa3Bg202734	121.051	35.9319	77.5149	0.155166	-1.09439
Fxa3Bg202957	1910.24	742.376	930.031	0.15531	-0.893772
Fxa2Cg202224	402.206	144.086	228.965	0.155311	-0.954952
Fxa2Bg202034	0	5.69884	1.91842	1	0.0678726
Fxa3Cg103247	36.3364	102.943	68.408	0.155467	0.974814
Fxa7Bg203151	350.586	1617.18	1922.2	0.155467	1.31068
Fxa4Cg201840	0	4.64027	7.93111	0.155467	0.0783773
Fxa1Bg200226	66.2742	25.9102	40.4143	0.155467	-0.889925
Fxa6Bg104386	5158.76	2241.86	2983.26	0.155532	-0.80449
Fxa5Bg100565	0	4.616	6.9868	0.155532	0.0785904
Fxa5Bg101473	886.472	278.597	387.424	0.15561	-1.04295
Fxa6Dg101127	547.277	131.549	205.536	0.15561	-0.184493
Fxa1Dg202079	6.64039	23.2368	22.9232	0.15561	1.17391
Fxa5Bg100372	269.451	143.853	149.763	0.15561	-0.639025
Fxa3Dg203637	7.242	25.1977	22.7145	0.156106	1.14821
Fxa2Dg202163	138.144	71.4751	68.0261	0.156236	-0.669276
Fxa3Bg200921	232.093	76.6974	161.571	0.156236	-1.01302
Fxa4Cg202999	561.914	290.991	318.728	0.156236	-0.665213
Fxa5Bg100059	16.7527	71.2356	42.4227	0.156294	1.27236
Fxa3Bg203565	55.8012	118.727	88.5752	0.156294	0.746815
Fxa3Cg100907	5.01935	19.3656	10.8187	0.157449	1.25944
Fxa7Dg102590	555.177	164.651	316.284	0.157459	-1.10415
Fxa5Ag200594	1044.61	285.209	445.441	0.157459	-0.239006
Fxa5Bg100695	147.56	68.861	73.9414	0.157459	-0.7482
Fxa3Ag102622	139.497	263.242	212.539	0.157459	0.648537
Fxa2Dg203035	0.449911	9.48832	3.57856	0.157459	0.0819437
Fxa6Bg104360	447.372	239.893	366.527	0.157595	-0.639061
Fxa6Ag103654	1371.53	441.843	569.705	0.157595	-1.02147
Fxa4Dg101308	22.9513	49.4681	40.1332	0.157708	0.757193
FxaCTg000224	4.82487	0	2.47195	1	-0.066255
Fxa3Bg201440	324.278	122.765	246.404	0.157927	-0.90944
Fxa2Dg200080	667.159	332.719	461.087	0.157927	-0.695514
Fxa1Bg200173	396.137	127.149	158.18	0.158011	-1.02411
Fxa3Cg102316	10.6413	27.3396	18.4591	0.158257	0.905565
Fxa5Cg200722	92.006	43.5107	48.3595	0.158259	-0.732261
Fxa6Cg104230	544.186	330.472	372.907	0.158444	-0.533497
Fxa2Dg202345	1035.86	587.307	730.738	0.15846	-0.589245
Fxa2Ag102164	1518.11	808.889	956.341	0.15846	-0.636427
Fxa4Dg100229	265.635	165.852	221.475	0.15846	-0.504834
Fxa4Ag102378	1088.91	311.865	583.358	0.158529	-0.272093
Fxa6Dg104019	0.449911	6.53988	3.14273	0.158753	0.128152
Fxa2Ag101319	3224.69	1517.41	3302.34	0.158753	-0.739483
Fxa3Ag104340	0	3.74228	12.0862	0.159067	0.09103
Fxa2Bg202948	911.688	449.747	559.349	0.159487	-0.699827
Fxa2Bg202545	8290.29	3820.6	4660.1	0.159487	-0.751943
Fxa3Bg201474	139.171	470.951	316.257	0.160046	1.08865
Fxa1Dg201174	0	5.23837	4.56804	0.160046	0.0706262
Fxa7Bg200047	607.398	150.002	338.583	0.160815	-0.188536
Fxa2Ag102253	4.58078	16.9985	44.2575	0.160941	1.18703
Fxa4Ag101847	37.0777	6.85229	15.6371	0.160982	-0.142598
Fxa4Dg100127	1039.66	458.986	498.759	0.161061	-0.782422
Fxa3Bg203767	309.783	564.203	394.633	0.161061	0.616243
Fxa6Bg101399	219.194	112.646	141.325	0.161061	-0.667109
Fxa7Ag203100	152.841	58.6458	73.0652	0.161341	-0.892777
Fxa7Dg102802	15.7274	53.0692	51.7165	0.161378	1.08936
Fxa6Ag102677	4167.93	2004.55	3213.97	0.161378	-0.720731
Fxa6Dg102238	9.63871	38.2794	52.4674	0.161382	0.248152
Fxa6Bg103942	229.376	73.0368	96.5413	0.161382	-1.0205
Fxa6Bg100586	1775.43	3058.48	3065.62	0.161382	0.570257
Fxa2Dg200784	33.4852	84.3566	48.5639	0.161382	0.871648
Fxa6Cg100473	1014.66	520.611	786.465	0.161382	-0.670667
Fxa6Cg101391	6.29355	27.8327	13.655	0.161382	1.31021
Fxa4Cg200397	1369.49	620.364	1130.49	0.161382	-0.763513
Fxa5Bg100769	3243.55	1727.41	1647.57	0.161635	-0.644601
Fxa6Dg102498	319.665	447.469	423.145	0.161822	0.386539
Fxa1Ag102948	972.973	452.311	639.906	0.161822	-0.745104
Fxa3Cg103736	86.6755	44.6201	51.8133	0.161822	-0.661033
Fxa7Ag201787	0.319929	10.667	11.4231	0.161822	0.0725829
Fxa4Dg102444	120.008	231.803	221.635	0.161864	0.662549
Fxa3Cg101710	1841.69	914.573	1332.56	0.162153	-0.693094
Fxa1Ag101038	595.055	254.255	299.985	0.162153	-0.806926
Fxa5Ag200840	3083.01	5280.06	4672.54	0.162393	0.564498
Fxa7Dg102619	0.688479	10.6614	7.37232	0.16268	0.115683
Fxa3Ag103941	3.87642	17.0467	10.6312	0.16268	1.33078
Fxa4Cg200206	88.3166	160.325	163.047	0.16268	0.611951
Fxa7Bg202604	18.2654	68.6524	58.1615	0.162771	1.15652
Fxa4Cg202367	21.7396	334.516	211.923	0.162771	0.056911
Fxa2Bg201439	0.639858	8.99518	7.90869	0.16333	0.152103
Fxa5Dg200357	1756.48	610.764	868.754	0.16333	-0.954
Fxa4Cg200171	414.626	231.235	341.514	0.163484	-0.600598
Fxa6Ag100451	555.24	773.605	668.525	0.163653	0.384094
Fxa4Ag103341	457.455	2324.96	2297.18	0.163653	1.26671
Fxa6Cg104451	5.57331	19.1821	13.7145	0.163653	1.11915
Fxa6Dg103521	59.8556	127.137	118.321	0.163803	0.733921
Fxa6Bg103687	4.94934	20.6442	11.8449	0.163856	1.27111
Fxa7Dg101507	29.5602	77.8618	42.5831	0.163856	0.901732
Fxa2Ag101188	24.6109	63.651	42.4638	0.163911	0.888469
Fxa6Ag101278	315.423	160.13	246.191	0.163911	-0.671805
Fxa4Bg100920	858.018	508.89	495.336	0.164037	-0.549291
Fxa5Bg102315	24.5373	157.438	138.124	0.164359	0.110689
Fxa3Ag103889	19219	7573.39	8496.27	0.164363	-0.860583
Fxa3Ag104313	63.1427	143.149	93.889	0.164363	0.785344
Fxa2Dg200484	6.89484	23.7116	10.5142	0.164363	1.12643
Fxa5Dg202990	2309.05	842.254	1114.29	0.164363	-0.914331
Fxa3Cg100879	0	5.71434	4.36666	0.164363	0.0643748
Fxa5Bg101896	41.7749	130.804	94.3506	0.164648	1.02057
Fxa5Ag200792	1579.12	1061.75	1155.72	0.164777	-0.440667
Fxa1Cg102065	154.687	73.2884	120.634	0.164777	-0.723817
Fxa6Ag103981	209.649	124.617	137.067	0.164968	-0.54339
Fxa6Ag101801	4.74902	15.7681	15.6571	0.164968	1.13895
Fxa4Bg102777	0	4.74391	2.83889	1	0.073704
Fxa7Ag201142	130.419	278.163	234.686	0.165082	0.739055
Fxa5Dg200543	2122.5	1254.45	1444.85	0.165246	-0.549834
Fxa2Cg202601	45.8445	85.0567	71.0786	0.165259	0.628696
Fxa3Bg200618	97.0276	40.8096	47.6131	0.165259	-0.811445
Fxa6Cg102372	140.806	748.589	573.005	0.165267	1.24975
Fxa1Ag100794	1675.65	460.57	612.237	0.1657	-1.08337
Fxa4Cg200185	987.173	623.089	803.265	0.166255	-0.492697
Fxa2Cg202298	173.08	253.674	225.47	0.166255	0.429653
Fxa4Ag102131	441.067	160.797	206.488	0.166676	-0.912105
Fxa4Cg201870	5080.26	2472.92	2715.48	0.166676	-0.695929
Fxa6Dg104098	4.08225	22.2467	10.6642	0.166676	1.44532
Fxa7Bg201113	17.2311	2.16533	5.23195	0.16683	-0.111422
Fxa4Cg200452	314.395	1522.61	1487.47	0.166836	1.24364
Fxa3Bg200481	11.2922	0.903593	5.32973	0.167171	-0.101291
Fxa2Cg200717	95.9725	154.346	124.389	0.167208	0.506842
Fxa5Dg201391	17.3527	83.3829	212.382	0.167231	0.149588
Fxa7Dg101944	18.3254	2.76492	20.5082	0.167231	-0.126765
Fxa1Bg200268	940.106	513.564	610.706	0.167231	-0.606465
Fxa1Cg101270	604.527	296.145	450.817	0.167231	-0.69815
Fxa2Ag103499	106.366	214.969	175.827	0.167301	0.691879
Fxa7Dg100510	246.189	1569.96	1065.36	0.167659	0.107548
Fxa7Cg101295	356.952	993.042	1161.42	0.167984	0.930174
Fxa1Ag101782	383.302	209.974	284.765	0.168125	-0.612785
Fxa4Bg101345	105.969	162.339	139.713	0.168125	0.463558
Fxa6Bg103876	2538.82	1421.92	1847.86	0.168311	-0.592782
Fxa2Bg203738	119.916	257.364	218.067	0.168585	0.736879
Fxa2Ag102708	11969.2	4784.83	6195.34	0.168653	-0.842291
Fxa7Bg202818	624.795	225.756	358.726	0.1688	-0.912969
Fxa4Dg101339	49.6726	6.28869	19.0658	0.169076	-0.0953079
Fxa2Dg201560	6.85303	35.4257	62.8513	0.169541	0.15398
Fxa6Ag100780	97.0134	20.1992	33.5665	0.169559	-0.14793
Fxa2Ag100512	20.9357	79.5621	41.4966	0.169559	1.13404
Fxa6Bg102925	44.5204	105.165	151.177	0.169559	0.81108
Fxa6Cg104157	1.79413	10.5479	11.9605	0.169586	0.207133
Fxa1Bg200615	91.6932	178.855	154.623	0.169749	0.659478
Fxa4Cg202655	275.68	509.785	533.672	0.169811	0.620367
Fxa1Dg202903	8.1363	28.1492	21.7692	0.169811	1.09167
Fxa4Ag100276	2.65667	19.7059	17.3602	0.169885	0.124273
Fxa5Cg200535	2091.51	1442.71	1519.33	0.169885	-0.413135
Fxa7Dg102365	0.7371	8.77056	5.10605	0.169886	0.151121
Fxa2Cg203361	1.82687	26.2229	24.9927	0.169943	0.0710977
Fxa5Dg202054	89.3429	34.1181	76.0482	0.170181	-0.875658
Fxa4Ag100018	371.066	726.458	525.09	0.170267	0.665911
Fxa4Ag103067	2311.88	1105.03	1524.02	0.170267	-0.713624
Fxa3Dg202860	41.8779	170.628	136.744	0.170267	1.14068
Fxa6Dg103579	79.6393	135.825	112.663	0.17052	0.553673
Fxa5Cg200771	252.806	1312.58	2216.72	0.17052	0.130679
Fxa3Cg101590	257.819	137.504	136.999	0.17052	-0.629703
Fxa2Dg201541	2127.18	1146.8	1672.32	0.17052	-0.62038
Fxa2Bg203463	591.985	347.747	320.055	0.17052	-0.550737
Fxa2Ag103332	1144.25	648.754	881.964	0.17052	-0.580023
Fxa3Cg103373	556.393	216.198	346.744	0.17052	-0.859576
Fxa7Bg201878	162.148	371.852	204.555	0.17052	0.780344
Fxa6Bg104085	706.006	469.307	551.698	0.17052	-0.447413
Fxa1Cg101306	4196.69	1879.24	2084.85	0.170581	-0.757721
Fxa1Ag101532	24.0825	121.795	202.563	0.170629	0.138251
Fxa7Ag202082	471.652	221.141	236.933	0.171081	-0.726798
Fxa3Bg203440	1441.94	693.501	982.308	0.171082	-0.709183
Fxa4Cg200801	225.263	59.8263	83.0591	0.171244	-0.205535
Fxa3Bg200691	75.6086	185.107	237.98	0.171788	0.825998
Fxa1Cg101354	11.6497	43.8059	30.1643	0.171788	1.12664
Fxa7Dg102705	618.211	428.296	548.399	0.171788	-0.411009
Fxa7Bg202766	19.6505	2.43665	12.585	0.171788	-0.106195
Fxa6Cg101244	117.559	281.252	250.062	0.171911	0.811296
Fxa3Dg203229	360.147	109.377	211.853	0.171939	-0.301052
Fxa7Bg201756	1014.25	291.244	364.755	0.171939	-1.02367
Fxa6Cg101956	32.4286	10.7682	15.6014	0.171939	-0.97038
Fxa1Dg201397	372.969	95.1763	495.005	0.172081	-0.188082
Fxa5Ag202576	310.35	168.119	203.857	0.172089	-0.613008
Fxa7Bg200911	0.36855	7.55421	10.802	0.172089	0.0973638
Fxa3Dg202845	33.5177	66.0661	56.3881	0.172089	0.669516
Fxa4Bg101971	2306.47	1408.24	1390.17	0.172089	-0.512746
Fxa4Bg102710	2637.06	583.742	998.664	0.172089	-0.149935
Fxa3Cg101249	212.531	557.276	440.548	0.172089	0.875747
Fxa5Bg100240	599.846	401.006	453.382	0.172089	-0.441457
Fxa3Bg202793	99.0584	194.534	160.826	0.172089	0.661311
Fxa6Dg100752	0	4.008	4.4333	0.172268	0.0812772
Fxa5Cg202996	434.36	787.743	506.034	0.172268	0.603027
Fxa5Bg103231	72.8686	32.5406	36.0696	0.172401	-0.753915
Fxa2Cg203441	20.1111	5.23986	9.81307	0.17274	-0.25904
Fxa2Ag100884	2719.53	1039.34	1360.26	0.17274	-0.861801
Fxa7Bg202605	12.7336	2.10277	5.37947	0.173058	-0.155626
[truncated: 99,845 more rows]

## Sheet: C. fructicola infection 72hpi
	baseMean_control	baseMean_inoc72	baseMean	p-value (adj)	resLFC
Fxa6Bg102929	36.846	515.557	480.82	6.26e-41	3.76049
Fxa4Ag102889	115.559	2105.26	1856.72	2.37e-26	4.12197
Fxa3Bg202427	71.5571	2140.51	1773.36	4.66e-23	4.82915
Fxa1Dg200658	9.42705	805.266	405.743	2.6e-20	6.2961
Fxa5Ag200786	594.898	44.0078	264.455	2.6e-20	-3.68245
Fxa6Cg101468	415.409	13937.4	18167.7	2.98e-20	4.97828
Fxa3Ag102739	587.882	17029.6	14081.9	5.12e-19	4.7583
Fxa7Cg101390	9.82282	161.199	117.613	5.59e-19	3.93057
Fxa3Cg102355	256.043	5348.59	5075.84	1.09e-18	4.29464
Fxa7Ag201580	1017.95	171.419	399.01	3.92e-18	-2.51809
Fxa7Dg101357	1039.04	42.3659	323.684	1.9e-17	-4.50175
Fxa4Cg200577	358.679	10543.1	13669.2	6.82e-17	4.76623
Fxa7Dg102540	118.957	4519.76	4384.7	2.67e-16	5.12444
Fxa7Ag203342	66.6253	819.223	665.032	3.97e-16	3.52784
Fxa6Bg103074	20.431	670.709	365.988	4.11e-16	4.9237
Fxa2Ag100165	9.19399	440.667	376.626	5.55e-16	5.48241
Fxa7Bg203106	24.6449	3018.08	2170.29	7.12e-16	6.75295
Fxa7Dg102851	7.67051	1485.05	1401.7	9.55e-16	7.3677
Fxa7Dg102114	9330.6	1573.46	3443.6	1.5e-15	-2.5036
Fxa7Bg201584	874.627	47.6431	294.489	1.81e-15	-4.08575
Fxa6Cg103590	342.56	21.803	156.197	1.9e-15	-3.87403
Fxa7Cg101442	1453.23	615.067	941.376	9.48e-15	-1.21393
Fxa7Bg202311	11260.5	2214.36	4498.5	1.19e-14	-2.28428
Fxa1Dg200408	51.6045	1080.34	749.749	1.91e-14	4.2623
Fxa5Dg202353	197.613	2636.16	2148.2	3.1e-14	3.63606
Fxa6Ag101738	664.142	25012.3	30768.9	3.1e-14	5.08615
Fxa2Ag103687	643.077	164.205	318.283	3.17e-14	-1.91687
Fxa6Dg102898	4761.21	61.3628	1704.16	7.8e-14	-6.09039
Fxa2Cg201453	76.4627	3760.54	3468.89	1.16e-13	5.46733
Fxa3Bg202425	5.72469	243.289	243.391	1.77e-13	5.26442
Fxa7Cg102224	3387.16	467.45	1460.86	3.25e-13	-2.77194
Fxa3Cg100259	11368.6	1988.68	5409.63	3.76e-13	-2.43864
Fxa5Bg101516	923.124	166.738	366.908	3.88e-13	-2.3986
Fxa3Ag102014	66.1812	1287.64	933.658	4.02e-13	4.15662
Fxa2Ag101744	2500	254.445	869.525	4.33e-13	-3.19444
Fxa4Ag103350	984.631	135.951	469.028	4.48e-13	-2.77406
Fxa3Dg203567	7.11299	758.169	937.954	4.89e-13	6.50601
Fxa5Ag201818	102.204	3641.88	2926.93	6.33e-13	4.98846
Fxa3Bg201202	45.5936	448.309	378.742	7.22e-13	3.20133
Fxa7Bg202291	3431.07	900.11	1762.72	7.22e-13	-1.87523
Fxa4Ag100250	525.262	4969.92	5047.11	8.96e-13	3.14462
Fxa1Bg200790	205.715	8.33371	60.051	9.2e-13	-4.5084
Fxa2Cg201273	6.31592	137.39	133.963	9.2e-13	4.30354
Fxa3Ag102499	66.6042	1944.98	2114.98	9.2e-13	4.7168
Fxa5Dg201456	1112.14	236.068	446.909	1.11e-12	-2.17016
Fxa5Ag201563	2096.3	353.873	839.057	1.37e-12	-2.48905
Fxa3Ag101229	1184.41	115.734	611.215	1.49e-12	-3.25022
Fxa4Bg101584	1338.28	246.728	620.76	2.05e-12	-2.36317
Fxa2Dg203284	244.913	49.7749	126.276	3.41e-12	-2.2268
Fxa7Cg101477	451.609	38.6519	153.691	3.49e-12	-3.42221
Fxa1Cg100417	111.433	2317.12	1706.24	4.69e-12	4.2349
Fxa5Bg100753	1569.23	268.124	829.325	4.69e-12	-2.46698
Fxa5Dg200564	1498.14	512.723	834.599	6.12e-12	-1.50215
Fxa2Cg200846	6.25045	170.994	111.585	6.7e-12	4.60567
Fxa7Cg102241	12064.6	2384.92	4740.38	6.7e-12	-2.26233
Fxa5Cg202633	1036.22	103.053	342.745	7.46e-12	-3.22126
Fxa6Cg100199	28.1823	510.668	374.383	7.77e-12	4.02981
Fxa3Cg101782	2223.22	641.772	1079.86	1.23e-11	-1.7369
Fxa7Dg101138	825.46	111.316	348.436	1.23e-11	-2.79385
Fxa3Dg201720	26.7298	1080.34	778.838	1.51e-11	5.16443
Fxa5Cg203009	1096.12	136.633	405.093	1.51e-11	-2.90372
Fxa3Bg201122	451.932	32.33	238.114	2.17e-11	-3.67165
Fxa7Dg101018	1.45832	261.246	403.25	2.46e-11	7.18902
Fxa4Dg100746	2892.55	599.392	1281.87	2.57e-11	-2.19478
Fxa6Bg102711	1281.6	252.727	575.126	2.67e-11	-2.26263
Fxa3Ag100490	385.169	124.608	229.236	3.06e-11	-1.57561
Fxa5Ag203553	7274.5	621.151	2565.01	3.24e-11	-3.41305
Fxa2Cg201454	248.577	10394.5	10098.9	3.41e-11	5.18646
Fxa7Cg102728	71.6621	1896.75	1862.1	3.42e-11	4.56068
Fxa7Ag201604	8610.3	2973.66	4866.24	3.62e-11	-1.48531
Fxa3Ag102812	36.8949	1598.76	1329.07	4.39e-11	5.23418
Fxa4Bg102887	319.425	15.0451	127.211	4.39e-11	-4.24275
Fxa3Ag103447	1293.02	271.389	546.327	4.74e-11	-2.17705
Fxa7Cg102670	1053.75	18.3708	280.657	4.74e-11	-5.62777
Fxa5Dg200731	1397.04	237.182	693.369	4.75e-11	-2.46857
Fxa6Cg102625	445.05	17.3076	149.866	4.75e-11	-4.51694
Fxa2Dg203248	756.889	251.735	432.977	5.48e-11	-1.53369
Fxa4Cg201118	29.1599	317.387	220.724	6.62e-11	3.30943
Fxa6Dg101386	244.392	3517.21	5141.4	9.22e-11	3.70999
Fxa7Ag201704	46.8668	2662.26	3127.46	9.64e-11	5.60182
Fxa1Dg200721	2119.78	291.538	905.854	1.02e-10	-2.75312
Fxa3Cg101929	9.44293	122.941	91.5514	1.03e-10	3.57232
Fxa4Dg102657	397.384	117.388	227.165	1.03e-10	-1.70104
Fxa7Ag202910	84.0334	2298.23	2076.23	1.03e-10	4.59654
Fxa3Dg201059	693.118	76.6553	319.337	1.04e-10	-3.0595
Fxa6Bg103007	591.466	171.371	328.101	1.24e-10	-1.7238
Fxa5Dg200823	2493.85	357.293	941.87	1.66e-10	-2.70912
Fxa3Cg103231	296.23	40.8566	137.343	1.67e-10	-2.75283
Fxa3Bg201850	670.313	262.243	390.664	1.78e-10	-1.31194
Fxa3Cg100794	5.39471	154.494	114.225	2.15e-10	4.58946
Fxa3Cg101550	323.208	100.822	170.609	2.24e-10	-1.62415
Fxa6Cg102805	6.53764	135.341	93.4761	2.3e-10	4.18305
Fxa3Dg202746	294.593	100.2	179.593	2.35e-10	-1.5004
Fxa5Ag200339	13.0166	535.395	316.047	3.27e-10	5.12453
Fxa6Dg100682	20.5241	134.901	90.6195	3.39e-10	2.59235
Fxa7Ag202398	15105.8	2981.8	6041.73	3.53e-10	-2.2507
Fxa4Dg100355	400.481	1424.12	842.465	3.62e-10	1.765
Fxa6Dg102753	262.713	1881.61	1752.27	3.78e-10	2.73046
Fxa5Dg203105	826.955	120.904	328.863	3.85e-10	-2.66921
Fxa3Bg201798	1616.01	385.911	674.223	4.11e-10	-1.98979
Fxa1Bg200797	1183.43	187.108	541.361	4.55e-10	-2.55627
Fxa1Ag100845	2214.37	419.626	999.586	4.68e-10	-2.30758
Fxa2Cg203035	314.119	39.513	166.711	4.68e-10	-2.87778
Fxa1Ag102739	3294.19	293.559	1075.19	4.82e-10	-3.34811
Fxa1Dg200240	18.9912	316.772	308.922	4.95e-10	3.87789
Fxa4Cg201713	2018.47	616.774	1128.6	5.22e-10	-1.64903
Fxa1Cg100732	5528.38	172.469	2234.03	5.84e-10	-4.7935
Fxa3Bg202253	2328.84	327.197	819.113	5.87e-10	-2.72014
Fxa1Cg100046	683.388	57.0546	323.837	6.05e-10	-3.43314
Fxa5Ag201794	1030.7	144.981	443.666	8.53e-10	-2.7153
Fxa6Ag100672	2290.47	793.754	1147.15	8.53e-10	-1.47501
Fxa6Bg103087	12636.8	422.002	4834.13	9.79e-10	-4.71372
Fxa1Cg100797	1134.49	174.63	469.021	1.13e-09	-2.58934
Fxa3Ag100888	12.2568	193.026	143.026	1.13e-09	3.79602
Fxa4Cg200635	2888.1	547.478	1275.08	1.22e-09	-2.30413
Fxa7Ag202907	322.241	82.5028	193.653	1.39e-09	-1.88542
Fxa4Cg201611	2.33674	103.085	87.4015	1.41e-09	5.12629
Fxa2Cg201870	173.615	804.398	421.158	1.52e-09	2.12681
Fxa6Cg102975	1355.9	21.6924	490.898	1.55e-09	-5.70697
Fxa1Bg201718	560.284	6.69588	182.552	1.59e-09	-6.12646
Fxa5Dg200064	102.764	2248.54	1734.27	1.59e-09	4.2538
Fxa2Ag102293	7.14022	150.67	133.396	1.72e-09	4.15679
Fxa3Cg101180	177.134	2458.37	1779.98	1.78e-09	3.63444
Fxa5Cg200261	703.499	2676.22	2130.7	2.09e-09	1.85712
Fxa1Bg201160	273.43	758.213	582.169	2.1e-09	1.41926
Fxa1Cg100719	11.6724	505.988	250.656	2.12e-09	5.17836
Fxa6Ag104069	17.2389	140.415	150.799	2.19e-09	2.87781
Fxa2Ag103060	33.328	418.361	383.246	2.5e-09	3.48719
Fxa1Dg202732	1108.52	416.622	728.619	2.66e-09	-1.36053
Fxa3Ag102496	2088.81	293.259	725.191	2.86e-09	-2.71284
Fxa5Dg203327	149.194	440.242	324.891	2.95e-09	1.49864
Fxa6Bg103455	104.988	1621.53	719.167	3.57e-09	3.77796
Fxa3Dg202043	126.316	0	71.6357	3.93e-09	-0.0545487
Fxa1Ag100749	4.96522	267.614	148.294	4.04e-09	5.46309
Fxa3Ag100258	16888.7	3844.6	8777.33	4.04e-09	-2.04605
Fxa3Ag100849	548.9	111.896	242.194	4.04e-09	-2.20093
Fxa4Bg103111	357.341	4.84521	130.379	4.06e-09	-5.93058
Fxa5Ag202536	108.859	568.538	460.469	4.09e-09	2.28563
Fxa1Ag100449	153.029	3107.47	2375.83	4.27e-09	4.16239
Fxa1Ag102979	1150.1	427.577	706.329	4.4e-09	-1.37502
Fxa2Bg202234	1.96819	205.93	366.024	4.53e-09	6.29968
Fxa6Cg101777	5.28515	105.951	80.4517	5e-09	4.08787
Fxa7Bg202947	950.63	34.3575	347.277	5.36e-09	-4.57236
Fxa5Bg102290	359.101	1497.59	1060.84	5.83e-09	1.97369
Fxa2Dg203272	1143.85	16.4973	453.093	6.83e-09	-5.83081
Fxa2Ag103922	188.569	0	113.436	6.97e-09	-0.0494562
Fxa5Bg100329	16.1118	503.955	350.544	7.12e-09	4.72604
Fxa5Bg103286	80.1952	737.834	551.571	7.12e-09	3.05342
Fxa6Bg104114	854.447	27.2695	343.014	7.12e-09	-4.73693
Fxa7Dg100070	1284.24	410.313	661.845	7.16e-09	-1.58008
Fxa5Cg201764	3139.25	1239.75	1868.23	7.25e-09	-1.28957
Fxa4Cg200353	248.829	1375.77	746.671	8.41e-09	2.35883
Fxa6Ag105015	135.817	1272.95	923.452	8.52e-09	3.08132
Fxa5Ag203138	1335.53	162.356	487.972	8.69e-09	-2.90209
Fxa2Ag103939	17.2726	275.08	270.674	9e-09	3.79884
Fxa1Bg200907	9.64876	141.866	170.492	9.64e-09	3.69384
Fxa7Dg100879	24.0919	279.648	212.55	9.64e-09	3.36239
Fxa4Ag100367	390.245	1541.56	911.288	9.67e-09	1.89599
Fxa4Ag102684	381.289	10.1448	130.82	9.67e-09	-4.98745
Fxa4Dg102390	858.823	230.335	426.506	9.74e-09	-1.81786
Fxa2Bg201221	346.799	112.111	173.118	9.76e-09	-1.56525
Fxa7Ag201287	238.492	42.3605	129.362	9.76e-09	-2.38846
Fxa4Ag102967	563.352	180.004	307.103	9.81e-09	-1.57885
Fxa2Ag103674	2549.9	105.671	1138.06	9.94e-09	-4.37792
Fxa3Bg200514	267.57	7116.27	8010.95	1.01e-08	4.51235
Fxa2Dg200492	132.477	11.7955	44.1482	1.03e-08	-3.32625
Fxa6Cg103345	39.3224	732.294	296.185	1.03e-08	4.02182
Fxa6Ag102958	931.898	137.367	398.27	1.12e-08	-2.63641
Fxa1Dg201162	58.9995	905.36	519.434	1.41e-08	3.74918
Fxa7Dg101375	3540.06	1233.1	1971.84	1.42e-08	-1.46009
Fxa6Ag103163	7805.58	192.31	3119.89	1.47e-08	-5.07827
Fxa3Bg203307	1214.23	164.483	443.014	1.65e-08	-2.74859
Fxa3Bg200261	17834	5246.34	10074.6	1.77e-08	-1.68897
Fxa6Ag104755	6.32629	99.1151	91.6563	1.81e-08	3.73953
Fxa2Bg200599	1094.38	250.859	543.346	1.91e-08	-2.02683
Fxa3Ag101845	13.1343	269.174	181.915	1.96e-08	4.13309
Fxa6Cg100200	14.2182	311.161	272.618	1.99e-08	4.23669
Fxa2Cg200101	16.5254	267.274	166.201	2.01e-08	3.80055
Fxa3Dg201141	46.544	326.84	272.324	2.01e-08	2.6865
Fxa6Cg101713	4265.07	917.61	1864.5	2.01e-08	-2.11423
Fxa7Dg102700	2785.86	314.184	1365.16	2.01e-08	-2.99723
Fxa2Cg201159	33.4661	534.936	495.117	2.03e-08	3.79488
Fxa6Cg102963	51.3157	455.778	264.78	2.09e-08	3.00455
Fxa3Cg100563	1375.87	18.4126	474.11	2.1e-08	-5.903
Fxa5Ag202426	455.214	175.97	265.173	2.1e-08	-1.3178
Fxa2Ag102474	1188.68	147.487	499.072	2.16e-08	-2.86426
Fxa3Ag101100	60.1045	474.013	393.65	2.16e-08	2.83417
Fxa5Ag200169	2955.41	24914.3	20807.5	2.16e-08	2.94757
Fxa6Bg100624	3904.8	964.462	1702.7	2.16e-08	-1.92639
Fxa5Bg103309	3506.18	391.389	1325.25	2.22e-08	-3.01002
Fxa6Cg104551	335.161	12.9335	135.94	2.22e-08	-4.47213
Fxa3Cg102459	1124.93	3251.59	2496.11	2.23e-08	1.47094
Fxa5Dg202133	867.276	95.3765	309.084	2.23e-08	-3.03308
Fxa2Cg200368	260.476	72.7541	137.027	2.25e-08	-1.75504
Fxa3Bg201822	239.969	18.7856	102.786	2.27e-08	-3.50002
Fxa5Bg100077	12.1981	345.015	258.601	2.29e-08	4.55656
Fxa2Ag103017	10.2037	393.406	361.472	2.37e-08	4.99293
Fxa1Bg200887	1206.16	14.1272	474.091	2.51e-08	-6.09383
Fxa2Ag100584	787.648	9343.97	7197.04	2.68e-08	3.3976
Fxa1Bg201434	551.402	4.63238	211.465	2.86e-08	-6.52407
Fxa4Ag100213	6.67896	144.967	127.116	2.86e-08	4.18477
Fxa4Dg102716	720.034	14.0089	268.79	2.86e-08	-5.39124
Fxa4Cg202365	294.103	12.0343	107.171	2.88e-08	-4.38107
Fxa5Cg202153	369.153	1919.58	1293.83	2.9e-08	2.26687
Fxa7Dg102225	1890.09	62.3277	673.767	3.14e-08	-4.66635
Fxa4Ag102703	330.99	50.4945	142.596	3.26e-08	-2.58238
Fxa2Dg201248	11.3557	112.983	100.581	3.31e-08	3.17767
Fxa3Dg200239	5410.12	1142.48	2684.91	3.64e-08	-2.13975
Fxa7Dg102482	279.63	5.91766	74.6532	3.64e-08	-5.29105
Fxa3Cg102655	5.02486	399.158	421.855	3.71e-08	6.02287
Fxa4Bg102051	26.1732	286.83	221.16	3.88e-08	3.27364
Fxa6Ag105117	271.695	4.01136	97.3858	3.89e-08	-5.75982
Fxa4Cg202920	221.4	29.9795	123.014	4.06e-08	-2.74435
Fxa1Bg202130	725.762	261.198	455.02	4.14e-08	-1.41025
Fxa5Cg202252	179.828	4.95625	70.2534	4.18e-08	-4.91368
Fxa6Ag103707	114.644	1339.1	760.55	4.18e-08	3.37043
Fxa6Dg102565	856.96	167.996	383.397	4.18e-08	-2.23809
Fxa7Ag201805	242.698	7.16311	83.9322	4.4e-08	-4.82659
Fxa5Cg200781	2358.76	376.013	946.722	4.42e-08	-2.51942
Fxa5Cg201396	873.182	141.879	325.86	4.44e-08	-2.49507
Fxa5Dg201704	64.2082	1017.89	867.588	4.6e-08	3.78267
Fxa1Bg202465	686.692	106.988	290.832	4.97e-08	-2.54938
Fxa3Dg201750	6884.97	624.79	3204.1	5.1e-08	-3.27978
Fxa5Cg201586	423.685	77.7035	185.146	5.44e-08	-2.33316
Fxa3Bg202738	4.97073	196.336	240.119	5.49e-08	5.03382
Fxa1Dg200690	649.079	42.3707	239.568	5.72e-08	-3.73441
Fxa2Bg200241	168.998	4.11608	84.9065	6.07e-08	-5.08464
Fxa6Ag104096	179.813	22.0649	105.587	6.27e-08	-2.88401
Fxa7Dg102570	2690.06	44.5589	923.554	6.54e-08	-5.5964
Fxa6Cg101088	500.246	68.0826	222.489	6.56e-08	-2.73089
Fxa5Cg200064	466.031	4365.57	3754.22	6.63e-08	3.06536
Fxa4Ag103281	691.231	11.6485	235.195	6.71e-08	-5.57239
Fxa3Ag100552	190.206	7324.03	7992.64	6.73e-08	4.98936
Fxa7Dg102812	2586.61	563.846	1128.73	6.74e-08	-2.08947
Fxa4Dg102686	307.093	1640.5	1317.73	6.9e-08	2.30202
Fxa7Bg203095	2.998	131.738	136.954	6.9e-08	5.1712
Fxa1Dg200720	2.80254	378.05	248.642	7.2e-08	6.65699
Fxa6Dg102278	3.5565	95.6238	99.9649	7.44e-08	4.46353
Fxa3Dg201137	9.63871	228.63	170.453	7.62e-08	4.2985
Fxa6Bg100205	35.0567	757.895	698.696	7.79e-08	4.20029
Fxa6Ag101058	3.89231	367.261	698.563	7.85e-08	6.17583
Fxa6Dg103492	538.602	12.7533	193.437	7.85e-08	-5.10286
Fxa7Bg202431	1204.01	37.2753	444.681	7.85e-08	-4.74064
Fxa3Ag102477	9336.14	1550.21	4479.97	8.09e-08	-2.45346
Fxa3Bg200964	212.599	58.1309	121.002	8.09e-08	-1.78152
Fxa4Cg202898	277.367	1476.68	1130.38	8.09e-08	2.29465
Fxa5Cg202917	1329.72	17.285	505.982	8.09e-08	-5.92239
Fxa6Cg102006	203.766	666.427	437.107	8.09e-08	1.63064
Fxa7Bg201185	351.778	13.6982	135.207	8.09e-08	-4.42635
Fxa7Cg101502	5912.16	1957.71	3250.17	8.09e-08	-1.52121
Fxa3Ag101732	669.729	242.705	420.104	8.12e-08	-1.40073
Fxa7Cg101039	67.9578	179.934	131.81	8.24e-08	1.34083
Fxa2Dg200807	555.953	2616.17	1514.01	8.25e-08	2.12342
Fxa3Dg200435	125.04	562.367	431.253	8.25e-08	2.05663
Fxa5Cg202921	917.442	94.5947	346.445	8.51e-08	-3.10806
Fxa6Bg102362	144.487	3.50793	68.6056	8.51e-08	-5.07717
Fxa2Dg201908	36.8777	201.346	141.339	8.57e-08	2.32176
Fxa5Cg200225	230.632	2.91947	101.398	8.7e-08	-5.96311
Fxa2Dg202861	4379.33	744.267	1771.83	8.84e-08	-2.42427
Fxa2Dg202305	735.276	16.3402	315.545	9.07e-08	-5.19325
Fxa5Cg201640	8.01864	280.496	239.632	9.07e-08	4.81455
Fxa7Ag203101	3288.56	241.311	1392.95	9.1e-08	-3.57047
Fxa1Dg201421	574.414	14.316	194.834	9.39e-08	-5.02991
Fxa2Dg200863	265.077	92.5766	156.266	9.39e-08	-1.44767
Fxa1Ag102599	393.316	54.8264	167.009	9.8e-08	-2.69431
Fxa3Cg103443	867.453	83.8107	367.414	9.8e-08	-3.19232
Fxa5Ag200076	305.803	2711.18	2492.62	9.8e-08	2.98505
Fxa1Dg200208	8014.94	7.36234	2925.14	9.94e-08	-0.261812
Fxa3Dg203293	870.194	285.717	485.597	1e-07	-1.52974
Fxa7Cg102458	5167	1456.16	2808.75	1e-07	-1.73848
Fxa2Ag101705	697.133	32.278	309.626	1.02e-07	-4.19273
Fxa7Ag202378	1543.31	198.435	652.751	1.02e-07	-2.80453
Fxa5Ag200395	593.578	25.6574	229.217	1.05e-07	-4.28285
Fxa1Dg202769	351.662	7.22506	129.958	1.06e-07	-5.29289
Fxa3Ag102723	395.297	6.34893	148.858	1.11e-07	-5.62543
Fxa5Ag202264	769.46	74.2855	248.164	1.11e-07	-3.19209
Fxa4Ag100709	423.021	3.9788	123.911	1.21e-07	-6.36333
Fxa6Bg102928	1208.14	28.1325	473.1	1.24e-07	-5.1214
Fxa4Ag103016	506.041	26.7269	202.419	1.29e-07	-4.01165
Fxa5Dg200867	63.6004	652.8	324.29	1.34e-07	3.18039
Fxa3Bg200163	279.476	9.75871	120.993	1.39e-07	-4.5667
Fxa7Ag201176	272.472	12.0703	117.981	1.46e-07	-4.24801
Fxa3Bg203133	1475.64	318.078	628.032	1.53e-07	-2.1014
Fxa2Bg202312	683.476	138.931	340.007	1.54e-07	-2.17788
Fxa5Cg201061	615.622	181.369	367.633	1.55e-07	-1.67493
Fxa6Dg101673	474.072	13.6168	190.509	1.56e-07	-4.83691
Fxa2Cg202962	108.5	936.376	556.555	1.58e-07	2.94568
Fxa6Dg103242	3.39377	141.158	61.8934	1.58e-07	5.02368
Fxa1Ag102223	494.853	29.7841	204.823	1.59e-07	-3.83434
Fxa1Dg202743	477.329	198.283	290.179	1.59e-07	-1.2121
Fxa2Dg203236	711.544	34.3473	332.469	1.59e-07	-4.1306
Fxa2Dg202163	138.144	31.0648	68.0261	1.6e-07	-2.04821
Fxa3Dg201139	0.319929	93.9357	90.9883	1.6e-07	7.39916
Fxa6Dg102744	5275	190.192	2004.08	1.77e-07	-4.51929
Fxa2Cg200962	206.081	34.3964	103.074	1.78e-07	-2.44737
Fxa6Ag101089	1713.71	30.8622	633.612	1.88e-07	-5.45957
Fxa1Ag100555	146.495	21.6332	67.0607	1.9e-07	-2.61397
Fxa2Bg203463	591.985	182.807	320.055	1.94e-07	-1.61279
Fxa4Cg200182	23.6517	473.143	479.371	2.12e-07	4.08385
Fxa2Cg201106	39.7876	593.799	425.034	2.13e-07	3.67936
Fxa2Bg200479	6.9762	104.571	76.8815	2.18e-07	3.71047
Fxa3Dg202983	2213.29	565.173	994.501	2.18e-07	-1.86922
Fxa2Dg202970	478.63	30.919	161.763	2.2e-07	-3.7399
Fxa2Bg203542	837.663	18.7786	353.122	2.26e-07	-5.15913
Fxa3Bg200436	5.58466	84.3649	63.8985	2.27e-07	3.61226
Fxa3Ag100745	293.994	14.3685	106.598	2.29e-07	-4.10649
Fxa6Bg104608	166.54	1.44176	62.2331	2.29e-07	-6.45497
Fxa6Bg103462	842.758	403.231	577.904	2.45e-07	-1.01968
Fxa6Dg101001	7.99142	65.6879	51.782	2.65e-07	2.81429
Fxa1Ag100239	11151.8	51.2512	4060.34	2.68e-07	-7.28858
Fxa3Cg100515	4874.85	139.63	1694.77	2.68e-07	-4.81527
Fxa4Cg200801	225.263	11.0535	83.0591	2.69e-07	-4.10377
Fxa6Cg102011	332.727	970.319	828.541	2.71e-07	1.46922
Fxa1Dg201689	80.6237	0	23.6278	2.72e-07	-9.69244
Fxa7Dg101065	19.5983	246.865	289.987	2.74e-07	3.42739
Fxa7Ag201556	5.70329	270.297	275.632	2.79e-07	5.22359
Fxa2Dg201469	2207.75	143.128	948.641	2.81e-07	-3.72162
Fxa1Ag102270	151.29	823.7	647.174	2.84e-07	2.31304
Fxa2Cg200881	166.254	38.2743	107.429	2.84e-07	-2.01621
Fxa3Cg100494	271.482	54.1257	132.772	2.84e-07	-2.19593
Fxa5Dg200305	0	75.2504	45.3194	2.89e-07	8.94837
Fxa6Ag100807	16.6373	176.356	188.134	2.89e-07	3.21268
Fxa6Ag100790	157.042	21.8392	68.8873	2.9e-07	-2.69184
Fxa3Bg202233	10215.7	1588.89	4775.41	2.93e-07	-2.53312
Fxa4Ag103365	177.508	36.7964	120.178	3.05e-07	-2.15587
Fxa7Dg102090	2756.98	608.916	1330.87	3.09e-07	-2.06337
Fxa6Cg101006	109.297	625.918	621.878	3.13e-07	2.3731
Fxa3Ag102179	50.0418	7.23162	25.5221	3.18e-07	-2.63139
Fxa1Cg100758	1421.22	97.5795	511.536	3.21e-07	-3.63227
Fxa3Dg200447	240.455	5.13945	79.9458	3.24e-07	-5.23021
Fxa1Dg200670	6727.19	559.066	3059.69	3.25e-07	-3.38299
Fxa1Dg200965	1.4742	136.565	503.175	3.39e-07	6.13092
Fxa6Ag100013	0.959787	183.039	82.2841	3.39e-07	6.99645
Fxa1Bg202572	367.789	40.5325	161.065	3.42e-07	-3.00175
Fxa5Dg201385	434.161	4108.48	3132.92	3.49e-07	3.06069
Fxa2Cg201612	201.467	27.6951	80.8651	3.53e-07	-2.7174
Fxa5Bg100769	3243.55	848.32	1647.57	3.54e-07	-1.83072
Fxa7Ag203294	22.8718	282.793	256.742	3.59e-07	3.42037
Fxa4Cg202747	30.7015	220.522	170.56	3.7e-07	2.67773
Fxa6Dg101372	258.42	32.354	120.722	3.74e-07	-2.83782
Fxa6Ag103349	348.56	2248.38	1262.26	3.8e-07	2.54206
Fxa6Cg100012	0.959787	161.176	67.906	3.82e-07	6.82327
Fxa4Cg202423	11.4922	323.057	239.006	3.94e-07	4.55461
Fxa7Cg102757	1808.55	3.90688	631.092	3.96e-07	-0.373899
Fxa3Bg200698	437.14	47.3161	185.496	4e-07	-3.02151
Fxa6Cg104277	1171.15	295.099	703.165	4.01e-07	-1.88065
Fxa3Cg102341	397.079	114.08	190.415	4.11e-07	-1.7087
Fxa5Ag202431	581.947	10.7138	236.652	4.25e-07	-5.41871
Fxa1Cg101639	628.752	29.0122	231.517	4.28e-07	-4.16994
Fxa6Bg102737	329.437	22.1006	157.312	4.35e-07	-3.66779
Fxa3Dg200405	21.3166	187.26	159.278	4.36e-07	2.93586
Fxa1Dg200712	410.281	37.6144	130.316	4.5e-07	-3.25147
Fxa6Ag100835	25.6906	192.733	154.577	4.59e-07	2.72342
Fxa3Dg201999	8969.73	1748.25	4590.41	4.61e-07	-2.22604
Fxa5Dg202252	528.183	9.42196	192.565	4.61e-07	-5.44566
Fxa1Dg200496	465.441	96.2782	208.833	4.81e-07	-2.14868
Fxa2Dg202357	17.7643	146.118	134.795	4.87e-07	2.87232
Fxa5Cg200770	19.6729	578.516	732.647	4.89e-07	4.57894
Fxa7Dg100310	470.917	6.31297	156.561	4.9e-07	-5.83474
Fxa1Ag100837	858.216	60.6527	259.684	4.93e-07	-3.59879
Fxa1Bg200442	46.9569	347.817	229.724	4.93e-07	2.72123
Fxa6Ag101112	7.54702	295.966	124.735	5.15e-07	4.96832
Fxa5Dg200362	730.167	17.2581	263.198	5.48e-07	-5.06288
Fxa6Ag101263	1515.57	223.714	687.792	5.74e-07	-2.59958
Fxa2Bg201605	9.00339	75.5761	56.2521	5.78e-07	2.8665
Fxa5Cg200804	314.248	3.57013	128.01	5.78e-07	-6.06702
Fxa2Dg201894	322.702	78.9183	240.081	5.85e-07	-1.9231
Fxa3Ag100457	364.587	46.9027	136.504	5.85e-07	-2.79029
Fxa7Ag201769	188.054	67.1413	118.846	5.85e-07	-1.41509
Fxa5Ag200831	567.453	135.829	295.678	5.91e-07	-1.94688
Fxa7Bg201071	17.4402	167.915	110.216	5.95e-07	3.05357
Fxa3Cg100565	95.3858	382.975	293.91	6.04e-07	1.88476
Fxa6Dg104351	222.903	1294.29	1043.81	6.04e-07	2.39266
Fxa5Ag201435	314.452	722.716	643.78	6.06e-07	1.14641
Fxa2Cg201673	208.588	11.0736	58.5141	6.07e-07	-3.99376
Fxa6Ag100753	13592.7	364.745	4244.51	6.2e-07	-4.88957
Fxa3Dg202017	1399.45	244.884	523.243	6.32e-07	-2.3681
Fxa7Cg102212	454.863	147.85	244.932	6.33e-07	-1.5368
Fxa7Bg202539	3825.11	1382.31	2035.71	6.36e-07	-1.39246
Fxa3Cg100870	50.7274	204.847	177.955	6.44e-07	1.90108
Fxa5Ag200641	368.053	33.9775	143.422	6.46e-07	-3.22805
Fxa5Cg202100	99.7008	361.18	379.857	6.48e-07	1.75393
Fxa7Ag200996	14.9994	104.038	113.14	6.48e-07	2.61864
Fxa5Dg202532	4.88937	62.9113	45.5931	6.83e-07	3.47419
Fxa7Bg200657	2096.5	71.4175	769.546	6.86e-07	-4.57166
Fxa4Ag102774	125.896	0	59.6049	6.88e-07	-10.3408
Fxa5Ag202453	1102.96	132.279	408.61	7.01e-07	-2.87945
Fxa5Bg102804	1129.72	198.875	423.748	7.01e-07	-2.35885
Fxa1Dg201222	1458.82	8292.86	7221.11	7.39e-07	2.36738
Fxa1Ag101180	0	93.0901	212.994	7.41e-07	9.12466
Fxa6Ag103593	712.046	19.7898	245.701	7.41e-07	-4.85016
Fxa5Bg102752	287.166	25.3734	198.55	7.45e-07	-3.29361
Fxa3Bg202719	1589.94	556.751	886.52	7.62e-07	-1.4346
Fxa5Ag202708	865.743	149.395	402.397	7.69e-07	-2.38689
Fxa2Cg200990	51.6956	703.441	270.622	8.05e-07	3.53714
Fxa1Dg202397	252.063	9.63843	135.415	8.12e-07	-4.43404
Fxa5Bg100749	84.1958	13.8648	55.6542	8.51e-07	-2.43158
Fxa6Bg103236	15.8405	265.904	176.093	8.51e-07	3.8048
Fxa6Ag102983	129.419	11.1487	69.0102	8.62e-07	-3.34022
Fxa3Bg203808	389.459	1422.08	1305.56	9.19e-07	1.76494
Fxa4Cg201900	0.7371	111.521	95.8338	9.27e-07	6.76985
Fxa6Ag105127	625.096	227.229	393.353	9.29e-07	-1.38355
Fxa7Ag201266	787.135	14.4144	287.26	9.51e-07	-5.39918
Fxa7Ag201952	1682.3	308.302	862.22	9.59e-07	-2.3025
Fxa3Dg200662	672.546	66.6046	290.419	9.72e-07	-3.12893
Fxa5Ag201183	601.305	168.526	369.282	9.81e-07	-1.73269
Fxa3Bg200569	892.838	39.3553	385.375	9.97e-07	-4.21614
Fxa3Ag103636	2906.69	341.454	1031.81	9.98e-07	-2.89777
Fxa2Bg202683	5851.7	160.91	2960.24	1.08e-06	-4.84798
Fxa4Cg202082	425.166	11.3317	173.029	1.08e-06	-4.89906
Fxa3Ag100527	556.297	50.883	234.199	1.09e-06	-3.23446
Fxa4Cg200321	1948.79	484.888	1104.29	1.1e-06	-1.89075
Fxa6Bg102485	1525.83	85.2107	618.496	1.1e-06	-3.89569
Fxa3Cg102870	31.4205	277.026	251.848	1.11e-06	2.95086
Fxa4Cg200270	405.918	2112.74	1384.88	1.11e-06	2.23979
Fxa6Cg103721	381.633	6.12686	156.19	1.12e-06	-5.58465
Fxa6Ag100680	6723.18	3222.62	4559.65	1.13e-06	-1.01243
Fxa4Ag100073	324.524	30.3461	141.506	1.14e-06	-3.2084
Fxa1Cg101050	364.242	25.0165	163.837	1.19e-06	-3.61719
Fxa2Ag103308	0.319929	82.9359	66.8236	1.19e-06	7.17004
Fxa7Dg101082	315.554	3.8838	128.143	1.19e-06	-5.91111
Fxa2Ag103727	398.077	86.2622	206.168	1.2e-06	-2.07168
Fxa3Dg200759	37.0599	311.043	220.637	1.22e-06	2.86991
Fxa6Dg102563	87.881	375.538	304.347	1.23e-06	1.98855
Fxa1Ag100841	890.721	25.6022	376.449	1.25e-06	-4.78808
Fxa7Cg101588	265.018	2.79192	77.4926	1.25e-06	-6.11959
Fxa6Ag103058	7456.55	1926.73	3882.37	1.26e-06	-1.83916
Fxa7Bg200079	1572.31	708.925	1030.5	1.26e-06	-1.09189
Fxa1Cg101271	121.177	1499.61	957.187	1.27e-06	3.40302
Fxa2Cg203217	482.604	162.235	255.895	1.28e-06	-1.48552
Fxa3Cg102152	10517.8	1274.73	4710.67	1.28e-06	-2.85293
Fxa7Cg103018	0.7371	123.557	102.945	1.28e-06	6.90018
Fxa7Ag201545	1723.93	695.458	1053.92	1.29e-06	-1.24222
Fxa2Bg200389	481.853	2017.99	1415.67	1.31e-06	1.94628
Fxa6Cg101443	110.862	17.7557	58.9931	1.33e-06	-2.48356
Fxa6Bg100821	172.283	7.83953	63.4352	1.34e-06	-4.15547
Fxa6Ag102095	346.371	143.564	200.743	1.35e-06	-1.20622
Fxa6Ag103757	226.231	2013.97	997.537	1.35e-06	2.96087
Fxa6Ag104491	2552	243.347	1169.49	1.35e-06	-3.17422
Fxa6Bg100979	545.734	137.444	277.139	1.35e-06	-1.87174
Fxa4Cg202900	593.794	16.9063	192.849	1.36e-06	-4.79793
Fxa6Ag102591	164.062	2.69376	89.2174	1.36e-06	-5.50982
Fxa2Bg202525	197.966	2.83444	81.7684	1.37e-06	-5.71297
Fxa6Cg102405	538.465	26.6737	234.024	1.41e-06	-4.04841
Fxa7Bg200995	1.42558	60.5428	58.5918	1.43e-06	5.01402
Fxa5Bg101132	533.387	144.656	317.492	1.46e-06	-1.77166
Fxa6Bg103574	484.634	155.829	248.56	1.49e-06	-1.54814
Fxa7Cg101705	170.071	8.34659	61.1422	1.49e-06	-4.07203
Fxa6Ag100535	130.202	18.2263	54.3264	1.53e-06	-2.65669
Fxa5Dg201993	595.5	222.093	340.688	1.54e-06	-1.34737
Fxa6Ag103086	943.481	439.593	628.141	1.57e-06	-1.05163
Fxa4Bg102506	223.737	16.7525	89.982	1.6e-06	-3.51104
Fxa2Dg201591	181.406	731.828	635.509	1.64e-06	1.89642
Fxa6Ag103713	185.295	1.69347	86.0845	1.65e-06	-6.31089
Fxa3Cg101421	57.2637	759.341	1725.53	1.68e-06	3.49623
Fxa3Cg101788	2236.16	5288.31	4573.06	1.72e-06	1.18212
Fxa1Dg200621	2262.01	218.887	798.805	1.74e-06	-3.15098
Fxa3Ag102108	877.145	309.978	491.758	1.74e-06	-1.41738
Fxa4Cg202941	689.899	59.0336	280.797	1.74e-06	-3.31594
Fxa7Bg201165	1.64827	89.4703	43.6639	1.74e-06	5.29018
Fxa2Dg201179	209.84	30.9074	83.2733	1.78e-06	-2.58282
Fxa3Dg200539	2664.55	10.8834	944.763	1.93e-06	-0.437377
Fxa4Ag102748	0	44.8271	41.6831	1.93e-06	8.0698
Fxa6Ag101490	8.62674	131.49	171.841	1.95e-06	3.62943
Fxa6Ag102720	1932.43	161.929	846.008	1.95e-06	-3.34302
Fxa6Bg102757	8.12042	129.181	105.896	1.95e-06	3.70872
Fxa3Dg201731	20.0469	191.081	176.179	1.98e-06	3.03729
Fxa6Bg101125	1458.61	242.728	685.103	1.99e-06	-2.41999
Fxa3Ag103123	352.889	104.875	228.505	2.02e-06	-1.64784
Fxa4Cg201621	198.69	33.7885	84.1086	2.02e-06	-2.39537
Fxa7Ag201756	612.393	63.7602	227.558	2.02e-06	-3.04956
Fxa7Cg100383	2359.83	52.7551	829.067	2.02e-06	-5.10626
Fxa3Bg202587	186.51	16.2124	88.0048	2.03e-06	-3.2923
Fxa5Ag200618	1795.78	675.106	1059.15	2.03e-06	-1.33464
Fxa1Dg200374	10.4355	73.7648	59.4375	2.07e-06	2.64635
Fxa5Bg102165	3007.8	432.559	1624.16	2.08e-06	-2.62515
Fxa3Cg102589	2549.39	733.951	1344.73	2.09e-06	-1.68935
Fxa6Dg101862	10.3223	189.383	181.993	2.09e-06	3.91811
Fxa7Ag201164	10.3596	205.16	91.2531	2.09e-06	4.03553
Fxa3Cg102882	976.633	108.371	359.75	2.1e-06	-2.96683
Fxa1Dg200032	138.266	48.062	106.219	2.13e-06	-1.44311
Fxa3Ag101815	656.167	119.423	273.798	2.13e-06	-2.30354
Fxa4Ag100333	7.865	1173.59	855.935	2.18e-06	6.70502
Fxa2Ag100705	1934.56	635.085	1058.8	2.25e-06	-1.51437
Fxa2Cg200343	582.949	20.3834	242.242	2.29e-06	-4.5143
Fxa4Bg102148	6246.19	1124.09	2921.35	2.34e-06	-2.31908
Fxa3Ag101783	137.83	4.66566	64.2651	2.35e-06	-4.60548
Fxa4Bg101639	831.462	157.032	408.928	2.38e-06	-2.25101
Fxa7Bg201128	69.2719	9.80147	40.2212	2.46e-06	-2.64926
Fxa7Bg200505	2978.51	907.461	1590.48	2.52e-06	-1.61334
Fxa6Cg102811	33193.7	1223.01	13487.9	2.58e-06	-4.43018
Fxa1Ag101671	959.575	43.9007	376.807	2.59e-06	-4.14266
Fxa3Ag102043	110.61	6.57756	42.2265	2.59e-06	-3.77497
Fxa5Cg200661	1463.68	755.425	964.112	2.59e-06	-0.911242
Fxa2Ag103046	3191.17	856.324	1905.27	2.63e-06	-1.78933
Fxa3Bg200336	1396.28	774.43	970.129	2.63e-06	-0.815287
Fxa4Bg103293	199.248	65.5883	111.461	2.63e-06	-1.50933
Fxa5Cg200564	901.458	2.03678	321.876	2.63e-06	-0.334952
Fxa7Ag202850	528.952	25.3022	155.409	2.63e-06	-4.09096
Fxa7Dg101359	295.14	82.1845	135.49	2.63e-06	-1.7386
Fxa2Dg201509	3999.74	934.499	1716.41	2.65e-06	-1.96798
Fxa4Cg200240	26.6128	275.286	167.222	2.65e-06	3.14266
Fxa1Ag100970	40.8977	224.858	268.966	2.66e-06	2.29167
Fxa2Cg202493	1739.44	245.443	807.105	2.66e-06	-2.64027
Fxa2Ag102253	4.58078	54.2182	44.2575	2.76e-06	3.28614
Fxa5Dg200671	291.415	41.239	149.145	2.84e-06	-2.63401
Fxa2Bg201495	431.892	48.4451	185.67	2.88e-06	-2.94743
Fxa5Ag202488	132.925	15.5977	58.7449	2.88e-06	-2.88076
Fxa1Cg102893	1447.68	179.466	515.541	2.91e-06	-2.8115
Fxa2Cg202301	15.1021	477.771	702.988	2.96e-06	4.63388
Fxa6Dg103119	495.556	15.8627	184.612	2.96e-06	-4.62021
Fxa5Bg103591	477.235	53.3873	208.386	2.99e-06	-2.95031
Fxa1Ag100492	19.5267	411.495	426.149	3e-06	4.0984
Fxa7Dg100869	19.3957	144.105	107.098	3e-06	2.70671
Fxa2Dg202658	321.84	100.396	167.799	3.05e-06	-1.57726
Fxa3Cg100959	232.21	42.5778	120.628	3.05e-06	-2.27975
Fxa7Ag201316	688.11	94.6032	296.715	3.05e-06	-2.67193
Fxa6Dg103243	417.458	3571.2	1633.67	3.07e-06	2.89692
Fxa1Cg101156	407.927	1191.36	838.313	3.09e-06	1.45771
Fxa6Bg103698	389.917	19.7888	152.036	3.12e-06	-4.00007
Fxa4Dg101466	524.336	93.0319	228.188	3.15e-06	-2.33297
Fxa7Dg100824	383.084	111.302	223.829	3.15e-06	-1.67445
Fxa1Ag100448	123.441	821.906	678.062	3.16e-06	2.5549
Fxa4Ag101943	54.7101	1031.66	838.884	3.16e-06	3.94476
Fxa7Dg100050	727.245	319.944	461.772	3.31e-06	-1.1216
Fxa6Ag102040	34.5659	202.19	171.912	3.47e-06	2.36969
Fxa5Cg201171	182.419	1.73599	75.4899	3.49e-06	-6.24015
Fxa7Bg201296	459.292	1.23256	166.89	3.5e-06	-0.45611
Fxa4Bg101276	801.786	5.61663	339.284	3.56e-06	-6.63966
Fxa1Bg200603	71.4333	291.742	199.338	3.68e-06	1.89947
Fxa1Dg201823	2.33674	93.5307	97.2466	3.69e-06	4.87491
Fxa3Cg101144	136.821	12.5645	59.2533	3.72e-06	-3.23086
Fxa5Cg202225	533.281	78.0511	208.962	3.85e-06	-2.59025
Fxa6Bg101053	246.722	825.276	913.62	3.91e-06	1.63923
Fxa4Cg202603	136.262	20.914	57.6178	3.99e-06	-2.52718
Fxa1Dg200346	1105.47	99.3617	610.989	4.04e-06	-3.23576
Fxa3Dg203569	215.837	8.05892	95.8342	4.04e-06	-4.40799
Fxa4Bg102623	0.319929	122.52	282.271	4.04e-06	7.63319
Fxa4Dg100985	853.6	99.6331	394.054	4.04e-06	-2.88557
Fxa2Cg200769	219.178	28.374	175.349	4.05e-06	-2.7479
Fxa6Ag103260	514.469	198.768	343.673	4.06e-06	-1.29339
Fxa3Ag100547	1235.28	231.488	579.536	4.08e-06	-2.25478
Fxa7Cg101162	564.189	11.9952	209.434	4.09e-06	-5.15567
Fxa2Dg201980	19.0061	311.91	271.318	4.1e-06	3.74276
Fxa4Cg202313	1669.56	653.394	963.864	4.23e-06	-1.276
Fxa2Cg201366	8663.98	223.526	2896.09	4.24e-06	-4.89388
Fxa1Bg200747	884.678	67.2108	354.793	4.26e-06	-3.4583
Fxa1Cg101340	248.075	1554.11	1338.17	4.26e-06	2.47248
Fxa3Cg100418	22.4333	157.572	128.462	4.27e-06	2.61489
Fxa3Cg103253	1867.23	221.455	657.181	4.27e-06	-2.86469
Fxa5Cg203220	316.556	930.165	698.766	4.34e-06	1.46213
Fxa5Ag201307	301.247	1661.3	1302.85	4.44e-06	2.30047
Fxa6Bg104039	29.344	115.25	121.975	4.44e-06	1.84054
Fxa3Dg200659	1197.32	532.836	761.602	4.45e-06	-1.10565
Fxa3Ag101435	298.285	817.79	593.054	4.49e-06	1.37487
Fxa2Ag102359	66.7063	6878.96	7069.75	4.5e-06	6.19943
Fxa3Dg200306	44.0098	445.242	429.833	4.5e-06	3.10643
Fxa7Dg102445	416.079	13.8748	164.609	4.5e-06	-4.55358
Fxa1Cg102266	430.834	171.392	261.936	4.58e-06	-1.25421
Fxa2Cg200183	91.3464	12.0472	38.2184	4.58e-06	-2.71155
Fxa3Cg102802	493.812	148.338	254.665	4.58e-06	-1.62631
Fxa3Cg101993	47.6629	1.28164	17.9931	4.66e-06	-4.94056
Fxa5Dg200549	1245.78	49.3363	494.366	4.68e-06	-4.3193
Fxa4Cg202963	943.47	296.067	578.96	4.73e-06	-1.56982
Fxa2Cg200722	1028.31	36.7057	399.282	4.76e-06	-4.46333
Fxa4Bg100920	858.018	309.335	495.336	4.86e-06	-1.38331
Fxa6Dg102778	61.6318	0	37.4	4.88e-06	-0.0365456
Fxa4Bg102178	27.3414	538.278	661.937	4.89e-06	3.98857
Fxa4Dg100267	214.458	877.613	603.169	4.93e-06	1.90289
Fxa6Cg100953	1707.7	45.927	571.586	4.93e-06	-4.82865
Fxa4Bg103151	358.388	31.3124	142.513	4.99e-06	-3.26176
Fxa4Cg200060	444.242	47.0391	191.264	5.06e-06	-3.01738
Fxa2Cg201882	1576.18	448.183	1074.76	5.11e-06	-1.69952
Fxa6Ag102599	18.4868	85.8858	95.506	5.11e-06	2.04083
Fxa2Bg200393	128.249	14.1957	50.6182	5.12e-06	-2.9734
Fxa3Cg100977	8365.01	2258.17	4337.82	5.12e-06	-1.76709
Fxa5Cg200371	228.305	48.296	85.7053	5.12e-06	-2.08511
Fxa1Bg202135	82.1715	2661.09	1739.97	5.26e-06	4.65591
Fxa4Cg202378	303.841	59.0792	138.639	5.26e-06	-2.20333
Fxa6Cg103313	186.192	1.96826	77.6854	5.31e-06	-6.13193
Fxa6Ag103153	571.093	86.786	291.812	5.34e-06	-2.53424
Fxa1Bg201314	380.773	89.9881	244.236	5.47e-06	-1.94654
Fxa5Bg102328	669.422	15.5357	235.641	5.64e-06	-5.02623
Fxa7Bg200368	768.665	4544.99	3442.6	5.69e-06	2.39067
Fxa7Cg101221	580.629	70.2379	237.315	5.69e-06	-2.83497
Fxa2Cg200320	134.897	23.5881	64.7936	5.73e-06	-2.34456
Fxa4Bg101665	646.672	89.9689	322.773	5.73e-06	-2.64817
Fxa5Dg202659	296.07	17.2097	164.925	5.75e-06	-3.81058
Fxa1Bg200220	4951.91	3.61557	1627.16	5.77e-06	-0.172929
Fxa5Ag200597	2087.98	93.9018	824.179	5.86e-06	-4.14652
Fxa3Bg200161	7687.83	2345.04	3851.61	6.07e-06	-1.60644
Fxa1Cg100854	3.23657	47.765	32.7695	6.34e-06	3.5791
Fxa4Dg100579	168.358	1.35016	51.745	6.34e-06	-6.41015
Fxa2Cg200604	544.887	1709.32	1292.83	6.36e-06	1.55066
Fxa1Dg200439	15.4457	324.273	308.219	6.38e-06	4.06633
Fxa7Ag200364	993.894	38.1784	360.22	6.44e-06	-4.3502
Fxa1Cg102867	260.189	80.6662	131.502	6.53e-06	-1.58072
Fxa6Ag104103	55.7892	1.82759	19.2675	6.53e-06	-4.60573
Fxa6Bg104583	6.66308	56.4941	53.3543	6.53e-06	2.82449
Fxa6Bg104377	11663.8	2105.85	5647.54	6.59e-06	-2.29824
Fxa6Dg104200	25921.5	4924.54	13108.6	6.61e-06	-2.22986
Fxa3Cg100671	372.142	37.2072	139.508	6.65e-06	-3.07951
Fxa2Ag100881	1150.99	300.597	830.085	6.66e-06	-1.80744
Fxa2Cg200417	3.12247	85.1427	30.5343	6.72e-06	4.38209
Fxa7Cg102353	104.96	0.755138	35.2039	6.72e-06	-6.48905
Fxa1Cg100789	289.022	18.3315	82.7846	6.82e-06	-3.69237
Fxa7Ag203289	2.54809	146.267	120.011	6.82e-06	5.3966
Fxa5Dg203080	126.334	768.476	600.529	6.84e-06	2.42272
Fxa3Ag103615	380.801	70.182	189.557	6.89e-06	-2.27227
Fxa5Bg100588	1217.03	53.9595	474.998	7.01e-06	-4.15873
Fxa3Bg203451	553.498	13.3643	215.643	7.1e-06	-4.95869
Fxa1Bg200542	161.574	40.3274	82.2103	7.24e-06	-1.87546
Fxa2Ag102392	179.674	728.769	555.057	7.26e-06	1.88404
Fxa5Ag202372	672.221	2224.76	1635.09	7.26e-06	1.61746
Fxa6Bg102414	6.51041	80.343	73.8778	7.26e-06	3.37474
Fxa3Ag101534	167.56	33.1091	79.9011	7.29e-06	-2.19033
Fxa4Ag103224	389.572	1048.86	774.279	7.29e-06	1.34571
Fxa4Ag102887	318.267	110.871	194.984	7.3e-06	-1.42751
Fxa2Ag100242	5.62647	92.4845	88.9942	7.37e-06	3.74573
Fxa2Cg200123	35.4638	0	32.9555	7.37e-06	-0.0371497
Fxa6Ag101361	2111.74	251.263	778.597	7.37e-06	-2.84968
Fxa1Bg200970	370.524	41.8377	162.482	7.39e-06	-2.92212
Fxa4Ag101293	42.3055	252.43	178.512	7.4e-06	2.38952
Fxa7Cg101335	238.042	1442.4	1064.9	7.41e-06	2.4183
Fxa7Cg102306	28.5706	144.363	78.3145	7.41e-06	2.17188
Fxa7Dg100668	249.582	492.508	370.983	7.41e-06	0.929876
Fxa1Dg200929	39.3425	0	13.5911	7.49e-06	-8.43804
Fxa5Dg202211	154.793	1036.05	621.913	7.51e-06	2.55126
Fxa3Dg200468	657.452	93.8614	290.041	7.57e-06	-2.60699
Fxa3Bg202469	11194.6	2128.14	5149.53	7.77e-06	-2.2276
Fxa1Ag101305	69.9222	466.876	341.096	7.95e-06	2.54701
Fxa1Bg201550	649.575	33.951	246.915	8.02e-06	-3.93575
Fxa1Cg102428	1.13839	38.0588	38.1962	8.11e-06	4.72181
Fxa4Ag100836	301.326	1648.33	1147.06	8.21e-06	2.28248
Fxa6Ag100928	6.02225	104.287	105.065	8.27e-06	3.78415
Fxa5Cg200368	384.459	29.211	154.339	8.41e-06	-3.44029
Fxa5Cg202370	9.83417	77.4146	59.8982	8.57e-06	2.72993
Fxa5Cg203095	1919.68	218.549	941.916	8.58e-06	-2.90513
Fxa1Ag101640	585.765	114.413	271.014	8.66e-06	-2.19045
Fxa1Bg201268	160.651	832.089	793.315	8.72e-06	2.20762
Fxa6Dg103372	1067.22	45.0769	410.526	8.85e-06	-4.21805
Fxa4Cg200580	171.008	2345.19	2652.61	8.86e-06	3.50589
Fxa5Ag203449	134.594	29.7535	65.2248	8.86e-06	-2.02234
Fxa3Ag103849	2.01682	171.241	168.353	8.87e-06	5.85813
Fxa3Bg200493	794.956	82.814	322.378	8.87e-06	-3.02221
Fxa4Ag101312	3267.28	33.0397	1211.18	8.87e-06	-6.10405
Fxa5Bg100369	2721.97	548.407	1128.53	8.87e-06	-2.14803
Fxa6Bg103861	175.325	563.341	398.714	8.87e-06	1.57689
Fxa7Ag200039	278.516	23.0645	110.935	8.94e-06	-3.32334
Fxa2Ag103351	2889.63	394.426	1430.01	9.01e-06	-2.66341
Fxa4Dg100777	1245.93	510.573	730.532	9.01e-06	-1.21029
Fxa1Ag101337	275.991	100.616	168.861	9.02e-06	-1.36659
Fxa1Ag102984	365.813	167.692	238.192	9.02e-06	-1.06454
Fxa7Bg201756	1014.25	92.0287	364.755	9.15e-06	-3.20362
Fxa6Bg102823	10546.9	3444.97	6174.79	9.27e-06	-1.50989
Fxa7Ag201177	738.235	22.1978	263.776	9.27e-06	-4.66504
Fxa7Cg102810	313.077	45.8689	145.387	9.27e-06	-2.57178
Fxa7Ag202881	165.275	13.1063	55.3271	9.28e-06	-3.37842
Fxa2Cg201747	540.693	180.357	305.209	9.48e-06	-1.4813
Fxa3Dg201502	55.4573	0	26.561	9.52e-06	-8.95324
Fxa7Bg202666	826.908	62.0128	556.682	9.53e-06	-3.4592
Fxa7Ag202522	3130.99	171.784	1121.5	9.59e-06	-3.86682
Fxa6Bg103567	990.033	50.805	392.873	9.68e-06	-3.95635
Fxa6Cg102714	5235.58	1663.71	3108.75	9.68e-06	-1.54368
Fxa1Cg101146	406.673	2863.04	2630.96	9.7e-06	2.61361
Fxa7Ag201101	2.75392	131.782	100.312	9.75e-06	5.10916
Fxa7Ag200621	2138.77	64.7194	773.876	9.84e-06	-4.65959
Fxa4Ag102220	10297.1	2204.44	5024.33	9.89e-06	-2.06525
Fxa1Ag102554	1101.71	109.864	760.475	9.9e-06	-3.07775
Fxa2Bg200115	1.5883	40.488	28.2596	9.94e-06	4.39244
Fxa2Dg202931	1541.29	53.9014	573.866	1e-05	-4.45897
Fxa3Cg101395	10612.3	1757.16	5153.83	1e-05	-2.40516
Fxa5Ag201066	2661.39	87.2875	943.014	1.01e-05	-4.55073
Fxa2Ag102603	89.8712	2.53364	35.0488	1.03e-05	-4.73624
Fxa2Dg202471	223.6	5.3846	95.0226	1.03e-05	-4.96487
Fxa7Bg202710	362.684	11.7964	97.8027	1.03e-05	-4.56795
Fxa7Cg101836	689.816	111.72	348.308	1.04e-05	-2.43674
Fxa4Ag101504	1667.61	193.732	676.776	1.05e-05	-2.87495
Fxa6Bg103454	2.17954	70.4696	64.0312	1.05e-05	4.61631
Fxa6Dg100726	135.821	8.18284	56.0254	1.05e-05	-3.73256
Fxa6Dg103234	14056.8	5989.19	8676.3	1.05e-05	-1.15822
Fxa7Dg100980	4.22909	87.5096	39.5143	1.05e-05	4.01561
Fxa2Ag103374	632.372	201.317	356.257	1.07e-05	-1.54143
Fxa2Cg202577	162.724	10.5177	69.6166	1.07e-05	-3.66665
Fxa2Dg200843	238.421	17.5885	109.768	1.07e-05	-3.47162
Fxa1Ag100794	1675.65	145.826	612.237	1.08e-05	-3.2542
Fxa3Dg200141	216.82	14.2672	95.6121	1.08e-05	-3.62455
Fxa1Cg101079	30.3051	120.837	92.0238	1.09e-05	1.83476
Fxa2Cg201013	107.758	19.9229	55.8428	1.11e-05	-2.25542
Fxa6Dg100553	9433.16	395.634	4154.92	1.11e-05	-4.22432
Fxa6Ag101950	487.581	31.1173	200.495	1.12e-05	-3.66203
Fxa6Ag103228	507.015	20.1258	205.334	1.12e-05	-4.29194
Fxa4Ag100508	382.397	10.5401	167.658	1.13e-05	-4.78766
Fxa6Bg101989	3955.25	911.861	2229.09	1.13e-05	-1.96263
Fxa6Dg103252	593.231	264.053	380.468	1.13e-05	-1.09905
Fxa7Ag201488	871.434	1.85359	269.672	1.13e-05	-0.271788
Fxa3Ag100459	4547.65	791.614	2068.81	1.14e-05	-2.34416
Fxa6Cg100727	28.4296	138.733	122.857	1.14e-05	2.10452
Fxa1Dg201013	109.275	7.26782	42.081	1.16e-05	-3.62236
Fxa3Ag100160	94.1872	1.19004	40.7933	1.16e-05	-5.83806
Fxa6Dg102802	221.704	34.3376	110.933	1.16e-05	-2.49514
Fxa1Bg202157	105.609	431.866	382.135	1.17e-05	1.89118
Fxa2Bg200484	197.515	9.04997	56.2849	1.18e-05	-4.11867
Fxa5Cg202922	3821.7	589.186	1598.46	1.18e-05	-2.49651
Fxa6Dg101929	139.019	18.4651	58.8706	1.18e-05	-2.69679
Fxa2Cg201761	933.947	59.8961	480.194	1.19e-05	-3.65807
Fxa5Cg200685	1365.79	480.071	865.915	1.19e-05	-1.40847
Fxa2Dg202512	98.1943	0.637541	36.5909	1.2e-05	-6.79454
Fxa5Dg201020	532.261	247.324	354.828	1.2e-05	-1.04194
Fxa6Bg101859	13.9164	103.158	89.6718	1.2e-05	2.64825
Fxa7Cg101076	947.01	85.926	423.093	1.21e-05	-3.19385
Fxa4Dg102690	1683.49	798.576	1156.86	1.23e-05	-1.01697
Fxa5Dg200848	517.864	2.76592	211.889	1.23e-05	-0.480801
Fxa5Dg201386	0.639858	45.5096	32.2883	1.23e-05	5.52451
Fxa7Cg102874	2159.37	323.024	1124.37	1.23e-05	-2.53573
Fxa2Bg200428	6592.01	702.449	3064.87	1.24e-05	-2.98298
Fxa2Dg201433	250.517	32.4257	125.771	1.24e-05	-2.73384
Fxa7Cg103062	72.2216	226.927	195.663	1.24e-05	1.54814
Fxa1Cg101683	512.062	50.3152	212.493	1.25e-05	-3.09384
Fxa5Ag201743	218.378	76.3534	119.511	1.27e-05	-1.41417
Fxa6Dg100874	496.272	125.534	237.795	1.27e-05	-1.84147
Fxa3Cg102164	1523.2	222.141	554.879	1.3e-05	-2.56939
Fxa6Ag103242	433.136	98.8952	230.833	1.3e-05	-1.97663
Fxa1Bg200770	558.123	195.886	325.214	1.31e-05	-1.41214
Fxa7Ag201772	1018.75	126.829	394.869	1.31e-05	-2.77855
Fxa7Ag203234	1416.22	398.653	698.83	1.32e-05	-1.70192
Fxa5Cg200541	1618.5	50.4146	597.503	1.33e-05	-4.60655
Fxa6Dg100881	1457.69	10.2855	526.59	1.33e-05	-0.524456
Fxa2Dg203386	503.508	29.5998	224.902	1.34e-05	-3.76565
Fxa6Dg102669	7638.09	2898.6	4940.98	1.34e-05	-1.30851
Fxa1Ag102697	46.3061	592.559	400.185	1.36e-05	3.39471
Fxa2Cg200332	250.796	51.8216	134.102	1.37e-05	-2.10832
Fxa3Ag104195	85.4522	5.43368	34.3127	1.37e-05	-3.68088
Fxa4Ag100728	10.1473	118.964	101.219	1.37e-05	3.2833
Fxa1Dg201311	357.858	9.00017	150.033	1.39e-05	-4.87612
Fxa2Cg201584	3084.8	531.888	1769.94	1.39e-05	-2.34751
Fxa5Ag201519	923.24	480.702	700.274	1.41e-05	-0.893555
Fxa2Ag103753	921.223	311.214	531.827	1.45e-05	-1.4607
Fxa6Cg100704	53.5724	240.448	218.88	1.45e-05	2.00707
Fxa3Bg200810	2.11957	51.6726	44.0658	1.46e-05	4.35727
Fxa2Ag100620	219.568	10.4417	94.6036	1.48e-05	-4.03666
Fxa2Dg201990	172.229	17.5754	86.9612	1.48e-05	-3.03373
Fxa7Cg102169	13.6947	109.774	93.7946	1.48e-05	2.75369
Fxa2Ag100321	248.715	10.6251	114.419	1.5e-05	-4.19198
Fxa2Cg200894	380.67	62.8503	198.53	1.5e-05	-2.41102
Fxa5Dg202881	390.262	117.131	215.111	1.5e-05	-1.61521
Fxa7Bg203068	716.772	261.895	408.12	1.51e-05	-1.36036
Fxa1Cg100780	2856.62	773.199	1427.27	1.52e-05	-1.75678
Fxa2Cg200386	521.712	33.4461	236.785	1.53e-05	-3.65432
Fxa2Cg203513	329.153	65.683	168.207	1.54e-05	-2.15109
Fxa3Cg103065	1266.55	416.169	635.722	1.54e-05	-1.50103
Fxa4Dg102688	659.754	20.827	227.68	1.54e-05	-4.59122
Fxa5Bg100698	409.167	69.8426	206.068	1.54e-05	-2.35983
Fxa6Ag101493	13.3411	111.647	96.4522	1.54e-05	2.80819
Fxa6Ag102751	609.24	241.154	377.447	1.54e-05	-1.25223
Fxa1Ag101822	2562.39	99.7802	978.649	1.55e-05	-4.31142
Fxa3Bg201092	2138.7	2.53364	750.417	1.55e-05	-0.19014
Fxa6Ag103445	417.31	16.1375	153.558	1.55e-05	-4.31899
Fxa3Dg202396	11393.5	2017.47	5175.29	1.57e-05	-2.30806
Fxa1Bg201472	61.8543	3.28222	26.1057	1.58e-05	-3.86491
Fxa3Ag100256	318.996	42.9327	126.955	1.58e-05	-2.67188
Fxa3Bg201222	176.607	1208.07	708.109	1.61e-05	2.56499
Fxa6Cg103467	939.782	56.54	383.659	1.62e-05	-3.73106
Fxa6Cg103594	0	32.2694	19.5196	1.63e-05	7.48398
Fxa6Bg103183	1733.6	118.735	696.255	1.66e-05	-3.55627
Fxa1Bg202360	264.727	89.4606	188.307	1.67e-05	-1.45971
Fxa3Cg100152	66.6237	0	30.1538	1.67e-05	-9.19674
Fxa4Bg100472	554.332	22.5968	228.759	1.67e-05	-4.23785
Fxa5Ag200252	1496.63	53.9781	564.027	1.67e-05	-4.40754
Fxa5Bg100375	444.61	13.1422	157.828	1.68e-05	-4.66124
Fxa2Cg200579	321.763	81.4211	168.743	1.69e-05	-1.83924
Fxa4Ag100603	290.886	82.2462	152.59	1.69e-05	-1.69702
Fxa6Cg103204	749.465	44.3086	326.532	1.73e-05	-3.75006
Fxa7Cg100388	402.588	1287.44	955.078	1.73e-05	1.56364
Fxa2Cg201034	3419.84	1260.9	2170.3	1.75e-05	-1.34498
Fxa4Ag102956	3391.36	101.638	1113.27	1.75e-05	-4.63668
Fxa4Cg200239	59.1515	398.821	246.333	1.75e-05	2.54069
Fxa4Cg201410	1642.94	242.833	749.069	1.75e-05	-2.54373
Fxa4Cg201600	864.724	5753.24	5820.42	1.76e-05	2.52774
Fxa2Dg202281	233.115	8.09512	93.0258	1.78e-05	-4.46607
Fxa6Dg101655	207.229	26.6611	111.532	1.78e-05	-2.73004
Fxa1Bg201223	305.142	1362.38	1197.12	1.8e-05	1.99843
Fxa1Dg201278	416.984	48.3159	193.39	1.83e-05	-2.86307
Fxa7Ag202365	601.477	194.067	330.594	1.83e-05	-1.52031
Fxa2Ag102004	6445.41	22.2615	2528.53	1.84e-05	-0.268608
Fxa3Cg102465	2302.19	1101.58	1389.31	1.84e-05	-1.00203
Fxa5Cg200369	150.788	11.1514	57.5518	1.86e-05	-3.45165
Fxa6Cg101176	6.24591	63.3445	32.717	1.87e-05	3.0472
Fxa4Ag102447	1930.3	206.91	811.467	1.88e-05	-2.96715
Fxa1Bg201488	45.158	0	20.1461	1.89e-05	-8.59628
Fxa1Dg201012	175.326	37.0994	77.6611	1.89e-05	-2.06668
Fxa6Dg100621	207.284	44.2272	108.12	1.9e-05	-2.06258
Fxa4Ag100275	101.081	698.461	413.494	1.94e-05	2.57327
Fxa2Bg202647	272.253	36.2721	91.5587	1.95e-05	-2.67388
Fxa2Ag103258	96.2121	9.10173	42.2073	1.96e-05	-3.13227
Fxa6Ag101616	203.857	42.9565	119.687	1.96e-05	-2.08728
Fxa6Dg103293	27.2448	110.656	92.4707	1.96e-05	1.86849
Fxa1Cg102888	551.174	52.0371	239.836	1.98e-05	-3.13292
Fxa5Bg101437	215.727	1215.78	848.753	2.01e-05	2.30463
Fxa6Bg100446	766.373	320.037	485.255	2.01e-05	-1.17853
Fxa7Dg102803	1165.24	4319.41	3736.57	2.02e-05	1.75544
Fxa3Cg102179	6.39728	75.4337	64.3033	2.03e-05	3.28302
Fxa6Bg104363	569.132	181.054	379.303	2.04e-05	-1.53721
Fxa1Cg100231	46.0078	549.766	504.309	2.06e-05	3.28737
Fxa2Bg203341	155.29	6.68276	62.9788	2.07e-05	-4.18624
Fxa4Dg102140	183.311	3.17775	60.2433	2.07e-05	-5.35958
Fxa6Ag103143	3208.04	6.03866	885.737	2.07e-05	-0.208007
Fxa2Ag101773	230.778	31.0126	108.644	2.13e-05	-2.66773
Fxa2Ag103771	1188.13	134.746	526.009	2.13e-05	-2.89045
Fxa7Ag202532	415.551	21.0705	160.001	2.13e-05	-3.94517
Fxa5Bg100252	2136.96	85.7376	862.982	2.14e-05	-4.26027
Fxa6Bg104472	1577.48	800.674	1044	2.14e-05	-0.925132
Fxa1Ag100171	16797.4	2988.83	6089.79	2.17e-05	-2.29572
Fxa1Ag101111	530.197	53.665	234.169	2.17e-05	-3.03752
Fxa4Cg202902	2159.75	1036.79	1514.69	2.17e-05	-0.998333
Fxa6Cg103689	82.87	20.2726	51.8758	2.17e-05	-1.86353
Fxa6Dg103215	167.124	4.55098	88.4524	2.17e-05	-4.7793
Fxa2Dg200581	55.9837	655.426	472.684	2.18e-05	3.2631
Fxa2Ag103485	282.949	67.4934	140.537	2.19e-05	-1.90988
Fxa3Cg101353	296.102	30.4676	124.308	2.2e-05	-3.02342
Fxa2Dg201245	948.616	8500.52	6328.77	2.25e-05	2.91717
Fxa2Ag103020	4.80898	162.666	134.983	2.28e-05	4.65937
Fxa1Cg101074	129.894	17.8502	60.027	2.29e-05	-2.63188
Fxa3Ag100618	1353.52	15.4667	476.74	2.29e-05	-5.89569
Fxa3Bg201983	198.704	49.7324	104.13	2.29e-05	-1.84696
Fxa4Bg101971	2306.47	930.279	1390.17	2.32e-05	-1.22233
Fxa6Ag104847	20379.4	3251.07	9514.96	2.33e-05	-2.43793
Fxa1Dg201686	54.444	160.366	128.99	2.37e-05	1.44542
Fxa5Ag201332	372.402	136.641	233.447	2.37e-05	-1.34941
Fxa5Dg200317	354.599	1140.79	862.387	2.37e-05	1.56733
Fxa7Bg201914	1457.34	260.64	721.77	2.37e-05	-2.28888
Fxa7Bg202875	152.425	4.50847	56.2386	2.37e-05	-4.6678
Fxa1Ag101039	76.9467	17.8341	39.9476	2.38e-05	-1.95636
Fxa4Cg200551	2723.6	554.935	1119.76	2.41e-05	-2.11785
Fxa6Dg103647	83.59	305.593	237.592	2.42e-05	1.73839
Fxa6Bg101005	104.444	1409.01	736.076	2.44e-05	3.45019
Fxa6Dg100978	760.771	141.702	380.276	2.44e-05	-2.23588
Fxa7Cg102808	653.06	280.386	489.7	2.44e-05	-1.14353
Fxa3Ag103349	181.568	11.6094	67.5203	2.45e-05	-3.64162
Fxa5Ag200390	3207.4	559.647	1303.61	2.45e-05	-2.32
Fxa7Dg100552	657.287	22.0384	241.424	2.45e-05	-4.48534
Fxa1Cg102863	209.89	88.0691	139.254	2.46e-05	-1.17599
Fxa7Dg101472	610.395	209.544	371.111	2.46e-05	-1.43371
Fxa7Bg203038	34.9877	0	19.3151	2.48e-05	-8.18453
Fxa4Ag103506	364.248	85.5892	174.842	2.5e-05	-1.93097
Fxa6Dg102445	1827.52	633.325	1036.27	2.5e-05	-1.42012
Fxa2Bg201297	643.242	186.987	383.872	2.52e-05	-1.65187
Fxa1Cg102519	32.9277	257.765	242.679	2.54e-05	2.7291
Fxa1Dg201961	84.2113	14.3291	60.4985	2.54e-05	-2.34293
Fxa2Bg200496	172.538	1197	1123	2.54e-05	2.57464
Fxa5Bg100619	314.032	6.71824	119.282	2.54e-05	-5.06685
Fxa6Ag102274	178.927	54.3458	93.8779	2.54e-05	-1.59914
Fxa6Dg102340	434.964	31.6951	200.404	2.57e-05	-3.46069
Fxa3Bg202430	153.153	5.73447	64.4388	2.58e-05	-4.35037
Fxa2Ag103561	636.092	33.9945	274.008	2.6e-05	-3.86994
Fxa7Ag201132	68.3319	7.69909	28.0094	2.62e-05	-2.88126
Fxa1Ag101382	182.147	14.8984	87.3555	2.64e-05	-3.31812
Fxa4Ag101726	1384.39	213.722	767.882	2.64e-05	-2.47368
Fxa4Ag103393	1402.47	524.615	784.835	2.64e-05	-1.32272
Fxa3Ag101095	15564.5	4008.92	8091.35	2.65e-05	-1.80748
Fxa3Dg200494	7523.05	86.5414	2322.06	2.65e-05	-5.86873
Fxa4Cg201088	635.048	203.354	396.75	2.65e-05	-1.52404
Fxa7Dg102421	22.3338	84.2147	55.4227	2.67e-05	1.77813
Fxa1Cg101208	235.6	520.833	425.819	2.68e-05	1.07526
Fxa2Bg200613	1376.22	104.532	707.078	2.68e-05	-3.41127
Fxa5Dg201093	429.808	119.835	257.099	2.68e-05	-1.70654
Fxa4Bg100351	863.697	3264.74	2162.5	2.71e-05	1.77386
Fxa1Dg200846	10.9408	69.5287	104.801	2.72e-05	2.4287
Fxa4Bg102621	257.826	8.17944	88.7864	2.73e-05	-4.5422
Fxa2Ag100586	113.888	6.23497	33.5061	2.74e-05	-3.87015
Fxa6Bg101912	483.877	200.474	298.156	2.74e-05	-1.18674
Fxa1Bg200045	535.191	150.083	318.458	2.75e-05	-1.69698
Fxa1Cg101432	513.54	21.94	208.589	2.77e-05	-4.16448
Fxa5Ag202435	1043.58	265.27	499.16	2.81e-05	-1.82638
Fxa3Dg201768	530.909	63.4961	213.544	2.85e-05	-2.81181
Fxa1Bg200239	1065.55	291.788	497.935	2.86e-05	-1.72264
Fxa6Ag100277	2033.35	850.933	1377.78	2.86e-05	-1.17517
Fxa1Cg101313	190.245	39.7018	89.6458	2.87e-05	-2.07733
Fxa2Ag100716	1045.62	59.4437	585.014	2.87e-05	-3.78904
Fxa4Bg102633	81.9216	11.4097	37.168	2.87e-05	-2.60274
Fxa1Dg202124	265.125	17.4682	116.865	2.88e-05	-3.60018
Fxa3Cg103661	211.279	40.0426	104.824	2.89e-05	-2.2101
Fxa4Dg100852	243.323	12.5739	112.081	2.89e-05	-3.91879
Fxa6Ag100747	554.781	140.046	287.729	2.93e-05	-1.83343
Fxa6Ag105011	75.5833	10.4815	46.4823	2.93e-05	-2.62759
Fxa3Ag101689	107.778	13.7739	58.7447	2.97e-05	-2.73963
Fxa7Dg101336	5.36197	137.848	139.778	2.97e-05	4.24707
Fxa3Dg200412	8.64716	152.103	202.696	3e-05	3.76441
Fxa5Cg200689	358.197	122.156	193.731	3.01e-05	-1.43669
Fxa6Bg102284	95544.8	41221.9	56374.8	3.05e-05	-1.13401
Fxa6Bg104548	64.8422	3.72709	30.6351	3.05e-05	-3.80825
Fxa3Ag100708	164.203	16.1703	80.8505	3.09e-05	-3.07264
Fxa7Dg100910	0.319929	89.1638	64.8274	3.09e-05	7.11421
Fxa3Ag102191	0	53.8105	41.0559	3.1e-05	8.15867
Fxa4Cg202646	93.874	290.214	189.829	3.1e-05	1.51379
Fxa5Bg100608	1215.53	448.671	703.203	3.13e-05	-1.33109
Fxa2Dg200580	40.6676	393.037	281.021	3.14e-05	2.9993
Fxa7Cg102407	232.725	3338.6	2286.76	3.14e-05	3.52358
Fxa3Bg203720	440.419	69.1417	215.073	3.15e-05	-2.44975
Fxa4Bg101209	502.035	120.188	245.385	3.15e-05	-1.90146
Fxa5Ag200542	152.751	51.7069	84.4622	3.18e-05	-1.4485
Fxa2Ag103600	0	34.9644	50.6932	3.2e-05	7.50498
Fxa3Ag101943	12411.8	1979.02	5156.45	3.2e-05	-2.42952
Fxa6Bg101234	43.006	144.824	126.448	3.2e-05	1.62148
Fxa2Ag100086	352.874	57.5208	175.381	3.21e-05	-2.40877
Fxa5Cg200557	1261.87	453.853	785.516	3.21e-05	-1.3715
Fxa5Cg200936	3876.31	139.864	1342.64	3.21e-05	-4.36726
Fxa4Cg202107	10.3768	82.6242	107.403	3.22e-05	2.71193
Fxa1Bg201443	961.833	56.6926	371.525	3.25e-05	-3.73208
Fxa4Ag103257	571.65	252.723	378.146	3.25e-05	-1.10169
Fxa2Cg200649	194.108	17.4916	76.238	3.29e-05	-3.19371
Fxa7Cg101059	0.319929	52.9001	27.5597	3.3e-05	6.42966
Fxa2Cg200198	452.119	3114.19	1709.72	3.32e-05	2.5625
Fxa3Bg203005	216.445	77.5281	129.1	3.32e-05	-1.37706
Fxa3Bg203432	429.577	2601.12	2300.37	3.34e-05	2.38672
Fxa5Cg200698	1497.21	558.782	917.613	3.35e-05	-1.32266
Fxa1Ag100378	652.02	38.1959	333.652	3.44e-05	-3.74257
Fxa6Cg102844	215.726	37.3846	105.406	3.44e-05	-2.32545
Fxa1Ag102132	493.606	1921.7	1146.78	3.49e-05	1.80451
Fxa3Cg101301	120.365	551.003	532.814	3.49e-05	2.01961
Fxa6Dg101349	278.283	61.3816	125.588	3.49e-05	-2.01081
Fxa6Dg100768	1423.2	539.555	838.578	3.51e-05	-1.30121
Fxa6Bg103489	244.967	74.759	140.404	3.53e-05	-1.58427
Fxa5Cg201339	217.464	1234.87	886.499	3.56e-05	2.30588
Fxa5Bg101636	62.9648	2.99163	28.2351	3.6e-05	-4.0846
Fxa7Ag200487	354.524	168.336	239.45	3.6e-05	-1.00762
Fxa7Cg102365	306.673	19.3415	115.73	3.6e-05	-3.64693
Fxa2Ag103996	960.168	292.06	564.729	3.62e-05	-1.59
Fxa4Ag103222	510.976	146.823	285.754	3.62e-05	-1.66096
Fxa6Cg104114	83.7229	4.78302	32.6959	3.62e-05	-3.78223
Fxa6Dg103272	105.199	1381.57	1252.11	3.64e-05	3.40719
Fxa2Cg201664	20.2463	210.195	154.387	3.67e-05	3.08615
Fxa2Cg202652	989.738	249.628	478.192	3.67e-05	-1.83497
Fxa6Dg103209	374.804	1808.94	1108.96	3.67e-05	2.09096
Fxa1Bg201867	477.419	208.172	302.77	3.69e-05	-1.12012
Fxa7Bg202239	21.3325	129.765	119.055	3.7e-05	2.3735
Fxa5Ag201301	149.493	2.39953	63.8805	3.73e-05	-5.40771
Fxa3Dg202580	1166.95	425.365	658.347	3.74e-05	-1.35344
Fxa5Ag200644	485.218	122.66	247.816	3.75e-05	-1.82714
Fxa2Bg202131	11.1016	111.19	96.2497	3.82e-05	3.02866
Fxa7Cg100984	286.761	61.7764	136.011	3.83e-05	-2.03499
Fxa2Ag103460	393.29	1076.49	869.876	3.87e-05	1.35429
Fxa4Bg102377	249.849	1.68035	133.425	3.87e-05	-6.5582
Fxa1Cg101515	337.926	9.90594	139.297	3.92e-05	-4.63814
Fxa2Cg201614	1070.3	2848.18	2079.51	3.93e-05	1.31422
Fxa5Cg200524	0	26.2116	36.9289	3.95e-05	7.11169
Fxa3Dg203339	21128	4733.83	9822.53	3.99e-05	-1.98185
Fxa4Bg100204	3.99506	130.053	370.317	3.99e-05	4.60302
Fxa7Bg202865	1353.51	348.336	761.45	4.03e-05	-1.80443
Fxa7Cg102974	2481.55	472.824	1156.26	4.03e-05	-2.19538
Fxa2Cg201899	367.633	18.9557	159.426	4.04e-05	-3.90567
Fxa5Bg100261	157.126	42.3341	88.9573	4.05e-05	-1.74263
Fxa3Ag103303	811.32	121.126	324.757	4.11e-05	-2.51751
Fxa7Ag201621	247.025	9.533	113.149	4.11e-05	-4.27576
Fxa6Cg103065	1598.84	85.6273	564.814	4.15e-05	-3.849
Fxa1Ag101818	70.4524	179.713	152.195	4.16e-05	1.25783
Fxa3Ag100172	58.5499	7.00299	25.3018	4.18e-05	-2.82877
Fxa5Cg202193	1.13839	48.6893	50.4783	4.23e-05	4.96736
Fxa4Dg101916	868.253	0.686619	410.919	4.26e-05	-0.178796
Fxa1Cg100920	292.771	2540.22	2363.24	4.28e-05	2.85645
Fxa6Ag104012	4287.06	11.5571	1372.4	4.28e-05	-0.217453
Fxa2Bg201881	76.5846	592.191	505.058	4.3e-05	2.69828
Fxa5Ag202995	1795.48	287.191	710.142	4.31e-05	-2.42221
Fxa3Dg201728	2077.01	7951.2	6348.14	4.33e-05	1.78347
Fxa6Cg103988	81.2921	8.42531	37.6558	4.34e-05	-3.01527
Fxa2Dg200489	370.849	1218.53	832.51	4.37e-05	1.58958
Fxa7Bg202434	201.701	60.1152	112.689	4.37e-05	-1.60882
Fxa6Dg100939	14.3404	158.432	156.507	4.38e-05	3.14004
Fxa7Bg200285	17797.9	81.6944	6499.14	4.38e-05	-0.277609
Fxa2Cg201201	4677.52	222.305	2085.88	4.42e-05	-4.00043
Fxa3Dg200371	190.073	32.3428	95.3934	4.42e-05	-2.33704
Fxa7Bg202775	3.30658	52.2232	27.4197	4.42e-05	3.7134
Fxa2Ag101066	107.445	6.45997	52.5699	4.43e-05	-3.68622
Fxa3Cg102939	261.007	2017.67	1521.27	4.48e-05	2.70401
Fxa7Bg202810	2357.65	40.0825	879.216	4.48e-05	-5.34005
Fxa1Dg200304	123.841	454.192	263.221	4.5e-05	1.72639
Fxa1Dg200132	338.562	1706.01	2415.21	4.52e-05	2.14482
Fxa3Dg201935	28.1593	0	7.96133	4.52e-05	-7.80519
Fxa1Dg201386	42.6987	635.777	439.419	4.54e-05	3.55479
Fxa4Dg102380	2095.91	23.8891	658.648	4.54e-05	-5.85217
Fxa7Cg102731	179.4	12.0083	69.0707	4.57e-05	-3.56143
Fxa1Dg201413	826.093	11.9918	320.495	4.58e-05	-5.5392
Fxa4Cg200540	580.258	128.63	290.792	4.61e-05	-1.99435
Fxa6Dg103244	214.208	20.9397	98.2511	4.65e-05	-3.06165
Fxa1Cg100428	525.352	75.025	242.017	4.68e-05	-2.56967
Fxa6Cg102338	0	27.9935	31.5975	4.7e-05	7.17077
Fxa6Cg101025	235.033	934.785	800.334	4.72e-05	1.83388
Fxa1Bg200794	792.156	6.53505	289.494	4.76e-05	-0.451337
Fxa2Dg203320	477.074	190.94	299.547	4.77e-05	-1.22988
Fxa2Cg200694	319.666	69.2085	158.363	4.78e-05	-2.02107
Fxa6Bg100503	98.0704	23.3327	48.7025	4.78e-05	-1.89477
Fxa2Ag102187	5.11206	37.9998	22.9148	4.8e-05	2.62893
Fxa2Bg200738	1022.33	254.563	729.991	4.83e-05	-1.84363
Fxa2Dg202672	10.7995	131.804	59.1543	4.88e-05	3.29047
Fxa1Cg100521	681.017	162.592	325.98	4.94e-05	-1.90083
Fxa1Cg101439	292.119	575.213	498.381	4.94e-05	0.922457
Fxa3Bg200983	15036.5	4141.57	7827.47	4.95e-05	-1.71213
Fxa4Cg201796	299.01	87.9078	163.245	4.95e-05	-1.62695
Fxa2Ag100550	409.018	2016.87	1513.67	4.96e-05	2.1147
Fxa4Cg201019	571.565	90.3241	258.035	4.96e-05	-2.4348
Fxa4Bg101255	435.214	167.773	305.146	4.98e-05	-1.2775
Fxa4Bg102233	202.5	26.4096	77.8158	5.02e-05	-2.6861
Fxa3Bg200610	918.329	100.575	409.004	5.11e-05	-2.91134
Fxa6Ag101328	595.385	249.664	342.341	5.11e-05	-1.16676
Fxa6Cg101031	203.476	62.5869	125.092	5.11e-05	-1.56558
Fxa2Cg202794	10194	3403.57	5863.67	5.15e-05	-1.45903
Fxa7Bg202226	167.196	10.2855	64.9219	5.18e-05	-3.66774
Fxa4Cg202349	1899.73	844.576	1235.31	5.19e-05	-1.09167
Fxa4Dg100591	229.132	577.475	431.405	5.2e-05	1.24003
Fxa2Ag103419	506.369	67.8672	197.325	5.24e-05	-2.65171
Fxa2Cg202988	13.5693	89.4465	66.3383	5.24e-05	2.47575
Fxa6Dg102475	329.462	25.9944	132.593	5.25e-05	-3.33866
Fxa1Cg102754	64.6769	654.093	288.325	5.26e-05	3.05856
Fxa7Bg201527	210.159	68.231	108.209	5.32e-05	-1.50371
Fxa3Cg103647	21.1905	125.048	104.409	5.42e-05	2.36301
Fxa4Ag100676	55.8268	6.59408	29.6007	5.45e-05	-2.80243
Fxa6Cg104144	650.713	108.655	313.455	5.47e-05	-2.3606
Fxa1Bg202553	177.554	72.1729	114.669	5.48e-05	-1.20845
Fxa7Cg100717	56.3415	6.42741	31.9322	5.52e-05	-2.85853
Fxa1Ag102804	5.74738	116.845	42.3895	5.55e-05	3.92726
Fxa2Ag100511	125.72	4.14208	58.2493	5.55e-05	-4.46143
Fxa3Ag103446	126.53	369.22	408.48	5.55e-05	1.42977
Fxa3Bg201842	209.71	20.4949	79.2385	5.55e-05	-3.05343
Fxa6Cg100389	0.688479	59.4818	63.7322	5.57e-05	5.78182
Fxa2Ag102825	324.615	72.6697	140.464	5.58e-05	-1.97859
Fxa2Ag103737	449.958	51.1	199.491	5.62e-05	-2.86348
Fxa6Bg102762	625.244	266.699	391.645	5.64e-05	-1.14493
Fxa3Ag102742	17.0752	225.234	207.552	5.71e-05	3.38304
Fxa6Ag101201	2168.76	271.002	850.236	5.71e-05	-2.7357
Fxa1Dg200548	100.327	394.638	294.043	5.72e-05	1.82054
Fxa3Ag104294	3757.6	581.176	1831.52	5.72e-05	-2.45849
Fxa3Dg203491	22.3629	183.392	170.246	5.72e-05	2.7723
Fxa4Bg102072	793.278	377.225	490.853	5.72e-05	-1.00243
Fxa7Cg101665	337.82	25.0264	122.176	5.72e-05	-3.41452
Fxa2Dg202937	0	33.993	87.9216	5.77e-05	7.47361
Fxa2Ag103067	993.564	258.065	567.818	5.78e-05	-1.78609
Fxa6Dg101242	1.00841	38.138	54.2102	5.8e-05	4.68284
Fxa7Dg101701	466.965	67.453	223.629	5.8e-05	-2.54961
Fxa1Ag101558	1209.54	19.341	473.166	5.87e-05	-5.40113
Fxa2Dg200259	170.194	33.0173	95.8217	5.87e-05	-2.16966
Fxa3Dg200823	279.837	1190.14	860.648	5.87e-05	1.91702
Fxa1Cg100778	939.15	393.529	526.367	5.91e-05	-1.16681
Fxa6Dg103701	118.955	16.8105	55.5542	5.91e-05	-2.57258
Fxa2Ag102870	9790.25	107.985	3563.8	5.93e-05	-5.8747
Fxa2Bg202988	1726.53	569.079	1083.97	5.93e-05	-1.47793
Fxa2Dg203094	3524.19	177.481	1405.69	5.93e-05	-3.91317
Fxa1Ag102400	1.05703	33.1801	25.9282	5.97e-05	4.48571
Fxa7Ag202008	2.9766	119.262	137.705	5.97e-05	4.77874
Fxa5Bg100574	557.98	1385.32	1147.69	6.06e-05	1.22009
Fxa6Bg100124	200.671	78.714	128.841	6.06e-05	-1.25154
Fxa7Cg101905	1.37696	35.8926	35.4368	6.06e-05	4.22135
Fxa5Bg103488	68.5513	1557.45	1624.57	6.07e-05	4.10398
Fxa3Cg101573	48.2918	0.294231	24.8593	6.08e-05	-6.59612
Fxa7Cg102636	301.118	12.4563	130.702	6.08e-05	-4.17555
Fxa7Dg102443	758.243	4.7145	463.264	6.08e-05	-0.338354
Fxa7Cg101524	229.924	13.3454	109.303	6.13e-05	-3.73502
Fxa7Dg102535	166.444	698.334	449.955	6.13e-05	1.89648
Fxa3Cg100413	3082.14	862.483	1756.43	6.17e-05	-1.68904
Fxa1Bg200173	396.137	55.0778	158.18	6.18e-05	-2.5945
Fxa4Dg102724	436.723	55.9756	174.849	6.18e-05	-2.69869
Fxa6Ag102333	966.94	148.808	417.048	6.18e-05	-2.46291
Fxa3Cg101785	35.3633	420.771	500.708	6.2e-05	3.24886
Fxa4Dg101655	249.483	43.6667	102.183	6.2e-05	-2.28961
Fxa7Dg102309	2492.18	423.544	1047.4	6.2e-05	-2.33404
Fxa4Bg102509	31.3177	85.2174	71.7985	6.27e-05	1.32938
Fxa6Ag101182	288.358	1072.2	968.048	6.27e-05	1.74048
Fxa7Ag200628	367.479	1399.04	1093.78	6.27e-05	1.77265
Fxa3Ag103203	3168.56	816.382	1477.47	6.3e-05	-1.7951
Fxa5Bg101556	677.153	2413.71	1867.42	6.3e-05	1.67829
Fxa6Dg103028	52.4418	4.68146	22.0758	6.3e-05	-3.14508
Fxa3Ag102011	1845.55	649.146	975.925	6.31e-05	-1.39274
Fxa3Dg203119	219.629	14.0876	99.161	6.32e-05	-3.60491
Fxa2Bg200129	8769.29	118.001	2829.83	6.33e-05	-5.61145
Fxa5Dg200949	23.9934	201.047	173.478	6.33e-05	2.79386
Fxa5Bg100631	404.436	129.819	215.267	6.34e-05	-1.50842
Fxa6Bg100023	40.3681	169.265	103.403	6.36e-05	1.90718
Fxa1Ag100188	0	20.8229	22.9906	6.39e-05	6.73933
Fxa3Ag102019	18.0369	152.234	132.445	6.39e-05	2.78978
Fxa5Ag200396	189.969	9.85394	67.8237	6.39e-05	-3.88282
Fxa4Bg100494	231.256	85.8317	162.808	6.4e-05	-1.32168
Fxa4Ag102728	0.639858	41.3379	31.6853	6.43e-05	5.32271
Fxa5Bg103189	384.903	57.0126	198.024	6.45e-05	-2.5117
Fxa7Dg102236	367.042	9.69043	125.008	6.45e-05	-4.75216
Fxa7Ag202942	3315.91	59.4143	1199.09	6.48e-05	-5.23859
Fxa5Ag200670	465.993	118.478	276.327	6.54e-05	-1.80672
Fxa2Cg200370	82.6882	18.8216	44.8309	6.62e-05	-1.96797
Fxa5Ag203596	327.414	9.22952	125.201	6.62e-05	-4.67157
Fxa3Cg103382	1353.41	74.0413	570.724	6.64e-05	-3.81197
Fxa5Ag203414	1682.89	342.66	758.634	6.65e-05	-2.09957
Fxa1Ag101631	457.084	209.999	277.174	6.67e-05	-1.04784
Fxa1Bg202471	47.3527	2.01078	18.7679	6.67e-05	-4.22782
Fxa3Dg201524	134.739	5.71795	65.9559	6.67e-05	-4.1315
Fxa4Dg102750	640.831	165.658	349.848	6.67e-05	-1.79144
Fxa6Bg104618	782.841	282.861	503.711	6.71e-05	-1.35716
Fxa4Ag102638	99714.5	14703.3	38149.1	6.73e-05	-2.5135
Fxa2Ag100170	276.614	93.8765	170.836	6.75e-05	-1.43607
Fxa3Bg200880	56.029	649.519	473.815	6.79e-05	3.21488
Fxa6Bg102052	103.195	24.1867	51.5496	6.8e-05	-1.93305
Fxa3Ag103889	19219	3849.18	8496.27	6.81e-05	-2.11819
Fxa3Cg100257	237.532	92.7435	131.572	6.83e-05	-1.25891
Fxa5Cg203214	1353.91	121.499	615.896	6.83e-05	-3.15657
Fxa1Dg200849	556.673	4443.62	4994.37	6.88e-05	2.73333
Fxa5Bg100452	158.944	14.7055	62.0141	6.88e-05	-3.12579
Fxa3Bg200259	279.882	79.2252	129.015	6.92e-05	-1.67239
Fxa4Cg200441	415.734	18.4452	174.158	6.93e-05	-4.07534
Fxa7Bg200094	1817.83	77.5883	611.874	6.93e-05	-4.11872
Fxa5Ag200885	38.4109	732.665	829.878	7e-05	3.85601
Fxa3Cg101507	110.492	3.69113	51.0775	7.02e-05	-4.46083
Fxa4Cg202742	271.655	108.596	172.155	7.05e-05	-1.22103
Fxa2Ag102371	2752.71	1352.66	1847.65	7.08e-05	-0.9598
Fxa5Cg202616	29.4215	0	9.49212	7.08e-05	-7.83939
Fxa6Dg103463	4230.96	16.3273	1357.16	7.08e-05	-0.237068
Fxa3Bg202819	297.699	84.3693	191.19	7.13e-05	-1.6686
Fxa5Cg200149	0	18.0535	14.2231	7.13e-05	6.52591
Fxa6Dg104301	2331.73	1236.03	1538.07	7.13e-05	-0.859549
Fxa3Ag102824	95.5434	1.09189	40.466	7.17e-05	-5.81375
Fxa4Dg101037	1415.88	391.597	784.64	7.17e-05	-1.70196
Fxa2Ag103357	17.4282	344.999	281.708	7.19e-05	3.92244
Fxa7Dg102078	370.589	143.94	218.486	7.19e-05	-1.26148
Fxa2Ag103345	1806.38	454.988	1070.76	7.21e-05	-1.82171
Fxa7Bg202277	363.912	132.729	202.129	7.28e-05	-1.34289
Fxa4Dg101040	8284.14	336.345	3481.46	7.29e-05	-4.18708
Fxa7Dg100995	74.4021	1.85359	28.0734	7.29e-05	-4.7841
Fxa6Bg102517	948.561	437.044	664.207	7.33e-05	-1.04228
Fxa6Dg100043	589.137	253.397	390.652	7.37e-05	-1.13304
Fxa5Dg201202	919.651	32.6334	394.273	7.38e-05	-4.36646
Fxa6Dg103241	19.0139	246.891	190.924	7.38e-05	3.34535
Fxa1Cg100238	891.052	354.541	509.442	7.4e-05	-1.23036
Fxa2Dg200799	986.507	243.136	630.418	7.4e-05	-1.84951
Fxa5Dg201634	55.3873	9.49388	28.677	7.4e-05	-2.30872
Fxa4Bg103205	272.245	22.2112	99.7956	7.46e-05	-3.27635
Fxa6Ag103489	174.771	57.1139	89.2616	7.5e-05	-1.47952
Fxa1Ag101048	665.138	357.706	429.821	7.52e-05	-0.843424
Fxa5Dg202273	872.269	142.678	347.274	7.52e-05	-2.38261
Fxa7Ag201044	37.9759	2.80188	15.6417	7.52e-05	-3.4613
Fxa1Bg200087	188.091	22.1857	86.3568	7.57e-05	-2.80443
Fxa6Ag101283	499.738	68.2762	208.387	7.57e-05	-2.61191
Fxa1Cg101965	8.63679	193.61	102.358	7.64e-05	4.06501
Fxa7Ag201579	358.521	45.1454	147.325	7.66e-05	-2.71603
Fxa3Ag103818	243.753	25.0332	101.871	7.68e-05	-2.98424
Fxa5Ag200655	1345.44	579.154	830.383	7.71e-05	-1.12973
Fxa6Bg101688	440.258	188.546	276.121	7.71e-05	-1.13586
Fxa6Cg104300	8988.81	2004.86	4655.59	7.8e-05	-1.9766
Fxa4Cg202316	7346.5	629.611	2431.68	7.83e-05	-3.21033
Fxa6Bg104273	6.19631	45.5475	41.6974	7.83e-05	2.56878
Fxa5Bg100853	1095.83	371.078	566.193	7.85e-05	-1.43722
Fxa3Dg202547	1204.75	448.718	634.004	7.9e-05	-1.31472
Fxa2Ag103932	5.58466	105.489	116.568	7.92e-05	3.79586
Fxa5Cg201812	1278.45	23.4083	460.163	7.96e-05	-5.20662
Fxa2Ag102891	206.931	11.4726	89.6329	8e-05	-3.79236
Fxa5Bg101688	98.0775	19.851	55.9827	8e-05	-2.09834
Fxa7Ag203086	576.686	59.1925	287.131	8.05e-05	-2.9781
Fxa1Ag100046	1206.67	450.653	831.21	8.09e-05	-1.31317
Fxa4Cg201318	422.5	20.195	164.874	8.23e-05	-3.97019
Fxa7Dg102537	96.0993	5.55783	40.2634	8.23e-05	-3.72882
Fxa4Bg102053	403.22	962.989	667.619	8.24e-05	1.16494
Fxa6Ag101000	1408.59	403.682	710.869	8.27e-05	-1.65419
Fxa1Dg201530	52.3844	3.07959	21.2791	8.33e-05	-3.68428
Fxa3Bg200185	25187.5	1016.28	9290.05	8.34e-05	-4.17173
Fxa3Ag102610	553.937	23.1276	237.502	8.36e-05	-4.14374
Fxa6Dg103171	1657.38	274.908	736.076	8.42e-05	-2.35773
Fxa2Ag100178	5813.41	93.9323	1884.89	8.44e-05	-5.35819
Fxa1Ag101704	969.98	181.313	444.742	8.47e-05	-2.20342
Fxa2Dg202543	38.7937	209.022	204.153	8.6e-05	2.2098
Fxa5Bg102396	57.1892	2.0793	24.1303	8.6e-05	-4.34186
Fxa7Dg100870	9.22251	81.8577	54.7477	8.6e-05	2.82889
Fxa4Bg101307	1202.92	265.601	604.678	8.61e-05	-1.98976
Fxa1Bg202243	1151.38	507.963	793.373	8.65e-05	-1.09808
Fxa6Cg101091	80.9515	0.545944	28.5015	8.65e-05	-6.49451
Fxa7Cg100031	2547.93	1106.85	1560.3	8.65e-05	-1.11555
Fxa7Cg101097	1.00841	55.5744	104.911	8.65e-05	5.14891
Fxa3Bg200881	81.6259	913.695	648.037	8.89e-05	3.15879
Fxa6Ag100408	0	27.6011	36.4427	8.89e-05	7.09194
Fxa1Cg100728	330.87	2505.19	2107.07	8.93e-05	2.65654
Fxa6Bg101146	20.28	167.247	174.099	8.93e-05	2.75289
Fxa6Cg101038	46.2033	7.3463	18.5924	8.93e-05	-2.43358
Fxa5Dg201391	17.3527	251.345	212.382	8.96e-05	3.4991
Fxa3Cg102495	365.309	1087.08	685.167	9.08e-05	1.44885
Fxa2Dg202249	466.548	928.343	671.834	9.14e-05	0.927297
Fxa2Ag101064	74.7324	6.87519	56.7527	9.16e-05	-3.10825
Fxa5Dg200982	1709.6	159.003	668.483	9.17e-05	-3.10614
Fxa7Ag201568	808.77	255.081	395.477	9.2e-05	-1.52791
Fxa6Cg104225	38.1613	223.017	210.07	9.28e-05	2.3112
Fxa2Ag102286	158.011	14.2674	78.1762	9.29e-05	-3.14902
Fxa2Ag101622	1227.76	9.14812	340.018	9.37e-05	-0.329784
Fxa5Cg200722	92.006	25.1146	48.3595	9.37e-05	-1.70815
Fxa3Dg200915	43.9884	155.057	137.176	9.39e-05	1.65158
Fxa3Cg100482	1052.56	62.6227	388.247	9.49e-05	-3.67591
Fxa6Bg103331	1529.69	6812.18	4853.88	9.73e-05	1.96684
Fxa2Cg201255	1696.39	597.016	885.349	9.76e-05	-1.38696
Fxa4Ag101907	976.895	42.2174	372.226	9.76e-05	-4.08969
Fxa4Ag101629	8601.98	3819.16	5491.27	9.77e-05	-1.08675
Fxa2Cg201007	590.197	227.996	350.364	9.81e-05	-1.26498
Fxa4Ag103299	201.128	608.571	502.582	9.85e-05	1.46831
Fxa6Bg104373	635.639	203.122	372.271	9.87e-05	-1.50709
Fxa5Cg203008	367.947	64.7525	152.098	9.88e-05	-2.28048
Fxa3Cg101509	154.011	6.38221	97.4399	9.92e-05	-4.17794
Fxa3Dg201985	148.472	44.6026	83.3795	9.97e-05	-1.58626
Fxa5Ag202282	101.488	357.028	314.849	9.97e-05	1.65783
Fxa2Bg202422	1492.41	3586.17	2513.37	9.99e-05	1.17284
Fxa3Bg201194	4.13087	51.1065	32.42	9.99e-05	3.23848
Fxa7Ag202798	222.105	10.9721	92.5564	0.000101751	-3.92271
Fxa2Dg200150	5435.91	59.1608	1747.57	0.000102466	-0.436066
Fxa2Cg200752	2889.66	1129.04	1594.46	0.00010253	-1.2508
Fxa4Dg100607	172.357	43.5666	88.2203	0.00010253	-1.80718
Fxa3Dg200227	336.422	1873.75	1690.22	0.000102955	2.25508
Fxa2Dg200243	117.439	234.165	238.439	0.000103072	0.93015
Fxa5Ag200189	0.319929	52.739	36.0915	0.000103796	6.3486
Fxa3Cg103420	125.172	10.3309	57.2204	0.000103827	-3.2518
Fxa1Cg100359	430.01	150.801	263.412	0.000104054	-1.38933
Fxa7Bg202609	351.259	26.8139	155.167	0.000104054	-3.34944
Fxa2Bg200210	0.319929	57.6552	75.6751	0.000105096	6.44482
Fxa7Cg101383	234.529	1.44176	74.6011	0.000105419	-0.39314
Fxa7Dg100379	74.5538	274.663	212.833	0.00010621	1.7159
Fxa3Bg203553	11393.6	1998.73	4923.48	0.000106728	-2.27834
Fxa2Ag102919	14.0782	100.976	95.8619	0.000107067	2.55981
Fxa6Cg104053	333.208	172.219	234.269	0.000107067	-0.893801
Fxa4Bg102936	901.9	216.737	432.669	0.000108559	-1.87549
Fxa1Bg202711	1901.02	681.812	1181.25	0.00010927	-1.3592
Fxa6Bg101711	553.785	61.1005	233.899	0.000109729	-2.87657
Fxa2Cg202516	265.51	17.2486	101.448	0.000110271	-3.55684
Fxa3Cg100151	1844.2	597.344	934.479	0.000110271	-1.49025
Fxa5Ag201659	164.937	538.318	409.869	0.000110271	1.56168
Fxa6Dg101039	937.536	153.308	397.07	0.000110375	-2.36846
Fxa6Dg102232	93.8653	2.83444	47.7784	0.000110498	-4.54567
Fxa3Dg201723	1180.01	414.375	628.224	0.000110505	-1.38809
Fxa2Cg201714	0.449911	37.8637	53.31	0.000111207	5.84888
Fxa1Cg100525	49.3845	6.13318	25.1843	0.000112438	-2.72172
Fxa4Bg101849	314.224	31.5165	132.352	0.000112878	-3.00148
Fxa4Dg101317	198.346	80.2085	139.017	0.000112878	-1.20462
Fxa5Dg200203	194.28	17.909	79.6566	0.000112878	-3.10547
Fxa7Dg102196	221.619	7.03919	76.3561	0.00011297	-4.49163
Fxa4Ag101280	106.646	32.1438	57.0792	0.000113171	-1.58096
Fxa6Ag104141	116.746	4.39379	44.2888	0.000113418	-4.24784
Fxa6Ag100046	130.177	44.6381	101.02	0.000114072	-1.40545
Fxa3Ag101877	43.9418	178.93	123.621	0.000114327	1.85626
Fxa3Ag101208	168.365	606.926	500.038	0.000114583	1.69063
Fxa6Dg103222	40.7742	134.782	114.779	0.000115278	1.56903
Fxa7Ag200378	103.268	4.02156	39.4662	0.00011568	-4.25852
Fxa7Bg201565	0	26.2606	37.5949	0.000116673	7.00945
Fxa7Cg102783	315.913	70.0669	164.695	0.000117773	-1.97288
Fxa6Cg101994	83.7656	14.7281	43.8639	0.000117823	-2.27151
Fxa6Bg103443	13368.7	5746.71	8148.13	0.000117837	-1.1269
Fxa1Bg200211	386.003	48.1669	174.912	0.000118445	-2.71544
Fxa5Cg202211	101.241	2.85095	36.9632	0.000119125	-4.66242
Fxa7Bg201550	2427.81	1168.6	1578.92	0.000119125	-0.981339
Fxa4Bg103113	1384.31	547.138	915.209	0.000119385	-1.23393
Fxa6Ag104172	705.996	27.5122	253.452	0.000119576	-4.21482
Fxa3Dg200456	35.6648	1.42864	14.8192	0.000119734	-4.17311
Fxa6Cg103567	3678.75	9.79515	1214.1	0.00011979	-0.189683
Fxa4Bg101053	87.8136	486.078	423.77	0.000120373	2.2471
Fxa7Cg100230	5182.76	18.5574	1969.04	0.000120987	-0.210138
Fxa4Bg102654	105.124	17.4381	51.4346	0.0001213	-2.34213
Fxa2Ag101688	121.003	12.7081	48.7884	0.000121385	-2.94455
Fxa4Cg200140	837.146	272.988	481.786	0.000121766	-1.48081
Fxa6Dg102756	32.9799	214.626	235.372	0.000121766	2.44597
Fxa7Bg203001	70.7844	288.322	224.457	0.000121939	1.8417
Fxa2Ag101714	193.639	56.5908	115.291	0.000122034	-1.61846
Fxa4Cg202938	2174.3	4.55391	717.4	0.000123043	-0.17711
Fxa7Cg101001	1.32834	93.6832	53.3852	0.000123043	5.45657
Fxa3Ag103449	321.32	112.308	202.543	0.000123809	-1.38879
Fxa6Bg103357	1818.77	198.482	686.287	0.000123809	-2.8845
Fxa1Ag102631	689.702	206.494	339.397	0.0001244	-1.58799
Fxa1Dg201753	503.998	237.377	321.149	0.0001244	-1.01205
Fxa3Cg103794	2227.52	213.321	971.099	0.0001244	-3.05356
Fxa4Ag101200	505.726	53.4065	217.674	0.0001244	-2.92615
Fxa4Dg100070	297.79	68.8979	149.221	0.000124584	-1.92397
Fxa6Ag104324	216.212	45.2625	142.524	0.000125065	-2.04337
Fxa6Ag103654	1371.53	208.758	569.705	0.000125467	-2.4587
Fxa2Bg201987	1070.55	154.24	587.368	0.000125657	-2.52821
Fxa1Dg201321	90.7525	7.66945	53.9159	0.000125731	-3.20228
Fxa5Bg101747	1408.1	519.538	813.483	0.000125986	-1.32231
Fxa2Ag100265	478.123	158.632	254.416	0.000127668	-1.45962
Fxa3Ag101690	26.1826	0	11.6278	0.000129791	-7.60965
Fxa6Ag104952	2708.38	1295.59	1724.38	0.000130184	-0.988599
Fxa2Dg200702	759.75	181.058	417.681	0.000130284	-1.88109
Fxa6Ag100584	35.422	2.41605	16.6253	0.000130284	-3.51907
Fxa6Dg102479	206.11	53.9029	108.33	0.000130284	-1.75528
Fxa3Bg203625	1.4097	54.6526	20.5055	0.000132204	4.72943
Fxa1Dg200362	264.654	1132.15	796.493	0.000132294	1.91016
Fxa2Bg203265	504.314	137.466	266.425	0.000132294	-1.70973
Fxa3Cg101821	122.642	5.04421	49.1737	0.000132294	-4.11848
Fxa1Ag100817	6208.88	1852.35	3173.08	0.000132569	-1.59345
Fxa5Ag202122	1035.82	423.494	651.122	0.000133097	-1.19098
Fxa6Cg103257	1897.26	307.231	794.982	0.000133335	-2.37545
Fxa5Dg200595	5231.63	1462.85	2706.28	0.000133486	-1.67577
Fxa5Dg202719	174.559	845.384	589.424	0.000133887	2.06549
Fxa6Ag103745	6700.25	2890.15	4249.86	0.000133887	-1.12338
Fxa6Dg100355	378.73	66.487	160.131	0.000134	-2.27827
Fxa4Ag103267	582.267	1314.74	1105.32	0.000135135	1.08859
Fxa5Bg103616	54.2019	2.03022	20.134	0.000135135	-4.26412
Fxa6Dg100189	5.925	64.156	68.1976	0.000135473	3.06588
Fxa7Cg101337	1.42558	27.976	21.5249	0.000135496	3.83577
Fxa4Ag102449	265.778	19.7118	116.692	0.00013581	-3.38991
Fxa4Dg101548	76.9629	8.62114	33.6612	0.000136356	-2.85276
Fxa4Cg202865	54.9412	11.4097	29.6108	0.00013714	-2.04824
Fxa6Bg101718	4346.31	2223.15	2726.67	0.000139946	-0.902523
Fxa1Ag100762	15625.9	2236.4	7900.13	0.000140229	-2.524
Fxa5Cg200537	418.933	56.0463	184.418	0.000140229	-2.62183
Fxa5Cg201199	640.796	66.2654	308.808	0.000142412	-2.94545
Fxa2Bg201529	261.012	91.4308	160.214	0.000142455	-1.39192
Fxa4Ag100144	1045.43	282.844	687.156	0.000143249	-1.71757
Fxa7Cg100150	387.198	63.4495	193.053	0.00014332	-2.35788
Fxa6Bg100052	9685.39	2804.69	4924.74	0.000143359	-1.62498
Fxa4Ag102720	21.4019	0	7.0147	0.000143516	-7.28636
Fxa2Ag100209	59.6096	7.96732	39.7991	0.00014422	-2.62558
Fxa3Bg202520	239.844	7.32298	91.4533	0.000144412	-4.51011
Fxa2Cg203116	1794.1	885.402	1227.13	0.000144538	-0.948563
Fxa6Ag100254	1195.81	525.112	750.588	0.000144538	-1.09841
Fxa3Bg203302	220.058	21.7245	107.223	0.000144592	-3.01008
Fxa3Cg101202	131.853	526.242	379.604	0.000144592	1.8155
Fxa4Ag100148	52.3533	263.694	185.921	0.000144592	2.11734
Fxa6Bg100626	14355.9	1017.62	6046.84	0.000144592	-3.42453
Fxa6Cg100415	133.517	28.1845	68.8583	0.000144592	-2.03158
Fxa7Dg102861	254.348	633.269	553.51	0.000145408	1.21059
Fxa3Cg101086	894.95	3008.69	2366.61	0.000145621	1.59683
Fxa1Dg200336	1523.26	460.518	780.426	0.000145974	-1.57395
Fxa3Bg202239	94.9949	17.2816	58.7164	0.000145974	-2.23195
Fxa7Dg101972	501.804	186.232	277.408	0.000145974	-1.31207
Fxa3Bg202554	1449.19	569.787	806.784	0.000145979	-1.22428
Fxa2Cg202663	607.962	71.7433	242.614	0.000146497	-2.77662
Fxa7Bg201339	594.22	86.3985	246.028	0.000146497	-2.51153
Fxa5Dg202320	29.096	161.521	114.694	0.000146522	2.24232
Fxa6Cg104088	887.082	14.2183	394.759	0.000147384	-5.33653
Fxa6Bg102988	658.147	58.2961	301.907	0.000148604	-3.14754
Fxa4Dg100853	53.3763	2.56328	23.3458	0.000148894	-3.98912
Fxa1Cg102828	7042.04	2076.89	3935.35	0.000148937	-1.60547
Fxa2Bg200238	198.635	58.3469	111.648	0.000148937	-1.61231
Fxa5Ag201491	763.924	4376.18	3251.83	0.000148937	2.2828
Fxa5Dg200772	491.425	162.297	270.539	0.000148937	-1.45786
Fxa5Dg203082	964.27	309.1	587.463	0.000149137	-1.49865
Fxa7Ag201873	195.767	1261.9	913.968	0.000149137	2.43196
Fxa5Ag200231	43.0624	4.08984	25.53	0.000149451	-3.06923
Fxa5Ag203613	128.29	36.0665	68.4318	0.00014952	-1.66791
Fxa2Cg200812	1427.09	647.969	964.401	0.000151639	-1.05327
Fxa7Bg202668	1195.81	88.057	942.093	0.000151639	-3.38142
Fxa7Dg101322	453.9	255.024	315.925	0.000151742	-0.784967
Fxa2Bg201988	173.2	24.5913	97.46	0.000152643	-2.53676
Fxa1Ag101045	467.832	0.34331	237.477	0.000153167	-0.161033
Fxa3Cg102966	1158.86	2369.13	1659.83	0.000153167	0.957654
Fxa3Cg103485	15049.1	3070.5	6663.98	0.000153443	-2.08457
Fxa2Dg200583	59.5506	4.50191	16.7358	0.000153455	-3.35938
Fxa5Dg200577	589.67	58.2855	262.618	0.000153978	-3.00471
Fxa4Dg100359	139.109	19.9725	65.7885	0.000153982	-2.53355
Fxa6Bg101324	5.41059	56.6163	101.197	0.000154745	2.9984
Fxa5Ag201507	2367.11	290.927	1059.59	0.000155218	-2.72316
Fxa6Bg103535	38.7542	6.60064	21.3953	0.000155787	-2.30514
Fxa4Dg101926	238.935	1.28164	85.0383	0.000157428	-0.326284
Fxa3Bg202040	61.4886	3.69113	24.1462	0.000158553	-3.66384
Fxa6Ag100423	22.5373	183.527	160.613	0.000159496	2.71899
Fxa3Dg200537	107.04	16.7158	52.9948	0.000159567	-2.42274
Fxa6Cg102854	563.711	37.9475	273.028	0.000160288	-3.4996
Fxa5Cg202424	637.89	154.001	365.783	0.000161114	-1.86073
Fxa5Dg202159	423.244	211.897	276.716	0.000161388	-0.927239
Fxa3Ag100186	3405.16	172.993	1340.84	0.00016179	-3.85165
Fxa5Bg103312	347.309	45.1016	157.449	0.000162334	-2.65941
Fxa1Ag101898	32.0684	195.378	141.763	0.000162421	2.34738
Fxa3Dg201045	969.356	3400.26	2612.01	0.000163845	1.63889
Fxa2Bg200944	289.884	1.76199	97.459	0.000163875	-0.330154
Fxa2Bg203691	69.6845	527.649	408.442	0.000163875	2.63253
Fxa3Ag100450	354.845	52.6639	181.619	0.000163875	-2.48946
Fxa4Ag103028	79.1077	8.42799	34.513	0.000163875	-2.89929
Fxa6Ag102335	42.1668	5.20796	20.0348	0.000163875	-2.721
Fxa6Ag104737	765.122	161.892	340.562	0.000163978	-2.02962
Fxa7Bg203115	298.727	746.136	652.586	0.000164034	1.20844
Fxa5Ag201680	135.675	12.2212	51.5668	0.000164111	-3.13534
Fxa6Bg104656	17557.8	6913.87	10399	0.000164111	-1.23503
Fxa6Dg102017	290.82	50.6998	133.416	0.000164111	-2.27322
Fxa4Ag101151	3040.8	455.743	1432.77	0.000165771	-2.46477
Fxa1Ag101566	600.446	35.8962	224.57	0.000165868	-3.64177
Fxa1Dg200251	541.919	219.308	305.457	0.000166717	-1.20059
Fxa6Cg101494	913.851	426.562	648.921	0.000166717	-1.01773
Fxa3Dg202143	52.1215	9.85031	30.6297	0.000167114	-2.16529
Fxa6Dg103564	8.11005	262.998	180.55	0.000167281	4.49173
Fxa4Bg101547	274.572	19.9132	117.711	0.000167671	-3.39593
Fxa2Cg200060	161.193	353.303	268.844	0.000168712	1.04769
Fxa7Bg200743	0.688479	31.6183	19.7749	0.000169102	4.9013
Fxa4Bg102395	790.231	79.8299	348.227	0.000169369	-2.9737
Fxa3Bg200067	2648.51	863.972	1299.64	0.000169482	-1.47468
Fxa6Ag100056	16844.6	6331.88	9871.31	0.000169795	-1.29345
Fxa2Ag102001	0	22.7525	29.5792	0.000170886	6.75109
Fxa7Ag200071	678.677	286.689	425.762	0.000171344	-1.14462
Fxa6Bg103879	291.552	136.814	198.272	0.000171582	-1.0104
Fxa1Bg201776	0	20.0386	15.4715	0.000171814	6.5998
Fxa7Ag203100	152.841	31.127	73.0652	0.000172331	-2.07592
Fxa3Cg101097	368.317	72.6323	225.339	0.000172501	-2.12038
Fxa2Dg202902	2025.65	8253.47	6452.21	0.000172576	1.83858
Fxa3Dg201523	433.689	145.895	243.613	0.000173404	-1.43592
Fxa4Bg102651	15.0059	72.1918	72.1164	0.000173404	2.05039
Fxa1Dg201237	216.196	18.348	107.387	0.000175684	-3.2031
Fxa5Dg201235	528.1	54.0411	264.337	0.000175684	-2.95725
Fxa6Ag101583	2008.85	721.88	1271.23	0.000175684	-1.35114
Fxa3Ag100946	388.549	137.529	252.211	0.000176155	-1.3699
Fxa2Bg200285	143.434	41.4642	78.3518	0.000177815	-1.62444
Fxa3Cg101714	16865	3093.42	7469.82	0.000177815	-2.20304
Fxa1Ag100481	229.419	35.9718	121.676	0.000178699	-2.40623
Fxa5Bg100129	456.081	960.409	740.998	0.00017924	0.995204
Fxa4Cg202590	0	89.0382	60.0782	0.00017956	0.321098
Fxa6Cg100764	3038.64	4.76018	1067.18	0.00017956	-0.150242
Fxa4Ag100357	105.138	850.293	803.045	0.000179733	2.71689
Fxa2Dg200679	1727.78	218.896	951.306	0.000180385	-2.67901
Fxa6Cg104240	107.745	2.02366	47.7899	0.000180511	-5.1288
Fxa7Dg102397	65.9297	4.24363	25.8241	0.000180935	-3.56622
Fxa7Ag202082	471.652	134.371	236.933	0.000182094	-1.64788
Fxa5Ag200755	3320.27	535.754	1558.42	0.000182463	-2.36967
Fxa7Bg202393	103.645	10.1122	39.2314	0.000182853	-3.03574
Fxa7Ag202563	494.99	1973.92	1448.35	0.000183757	1.81147
Fxa5Cg201546	28.9767	3.51449	12.0684	0.000184128	-2.76135
Fxa7Ag202916	441.228	37.7277	184.396	0.000184128	-3.18116
Fxa7Bg202923	173.612	3.95596	60.9661	0.000184128	-4.88171
Fxa3Ag101218	1589.52	5551.87	4473.63	0.000186567	1.6378
Fxa5Ag201982	4620.73	616.797	2334.32	0.000186567	-2.61135
Fxa3Cg101506	46.6198	10.2527	31.9757	0.000186655	-1.99281
Fxa5Ag200625	662.166	45.8425	297.268	0.000187531	-3.44892
Fxa5Ag203563	769.93	78.048	356.203	0.000187846	-2.96188
Fxa5Bg102071	790.326	336.727	470.286	0.000187846	-1.13395
Fxa2Bg201844	59.5289	0.846735	28.5461	0.000188073	-5.4895
Fxa2Ag101642	1509.2	591.61	893.065	0.000188258	-1.23932
Fxa1Ag101925	808.751	204.919	438.084	0.000190185	-1.79662
Fxa2Dg203126	174.311	18.6673	74.9899	0.000190636	-2.89039
Fxa3Cg101720	93.2397	17.0462	57.4961	0.000190831	-2.21962
Fxa3Dg201368	25.853	272.769	528.958	0.000190831	3.05242
Fxa4Bg101315	2723.5	58.3955	1016.8	0.000190831	-4.94084
Fxa6Ag100143	1300.88	0.938332	486.494	0.000191825	-0.130228
Fxa1Bg201858	702.709	3211.42	1973.15	0.000191947	1.98467
Fxa2Dg202844	90.1403	7.43426	38.7411	0.000193299	-3.22028
Fxa3Bg200173	36.3633	352.433	186.125	0.000193299	2.94063
Fxa1Bg201880	164.312	50.8206	95.966	0.000194458	-1.53661
Fxa2Dg202038	221.71	59.7032	109.408	0.00019481	-1.71497
Fxa5Cg202981	228.808	1145.51	855.436	0.000195246	2.09868
Fxa6Bg100011	4.15908	368.291	155.193	0.000196555	5.74
Fxa5Ag201556	548.433	108.109	261.743	0.000196947	-2.11406
Fxa2Bg200778	236.463	1236.09	635.079	0.000199974	2.1553
Fxa1Ag101465	652.275	30.8102	264.514	0.000199985	-3.93634
Fxa1Dg200426	3844.72	1230.74	1903.54	0.000200069	-1.49148
Fxa6Cg100442	328.483	140.811	201.104	0.000200395	-1.1235
Fxa2Dg202636	1598.76	737.246	1093.55	0.000200765	-1.03145
Fxa4Ag102599	102.04	11.034	39.2655	0.000200786	-2.88541
Fxa4Cg200290	59.6812	1.00685	22.3136	0.00020087	-5.1847
Fxa5Dg201205	1.79413	65.1203	26.6527	0.00020087	4.6218
Fxa2Bg203619	131.037	32.18	73.5321	0.00020123	-1.83739
Fxa2Dg202173	149.027	47.6297	77.2082	0.00020146	-1.49157
Fxa1Ag100813	609.954	304.989	388.174	0.000202406	-0.929551
Fxa1Bg202107	113.558	18.6911	55.3982	0.000202406	-2.35155
Fxa7Dg100886	17.1099	143.114	114.273	0.000202406	2.74689
Fxa7Ag200290	19422.1	225.857	7206.67	0.000202817	-0.383679
Fxa3Ag102596	281.754	34.1483	124.974	0.000203358	-2.73377
Fxa6Cg101422	124.415	331.202	292.225	0.000204061	1.29276
Fxa7Ag201715	467.816	98.3067	201.615	0.000204061	-2.02869
Fxa3Ag100981	314.344	1650.92	1304.07	0.000204182	2.15948
Fxa2Bg200846	219.081	9.07865	92.396	0.000204747	-4.10051
Fxa6Cg100611	28073.9	2016.48	11607.8	0.000204747	-3.38639
Fxa7Bg200384	83.6898	3.36094	33.5286	0.000204747	-4.16137
Fxa4Dg101527	205.021	0	89.5962	0.000206296	-0.163714
Fxa7Cg101245	875.593	329.003	521.401	0.000206593	-1.29087
Fxa4Cg200852	1321.35	112.349	520.741	0.000208684	-3.18314
Fxa2Ag102206	646.141	223.246	470.251	0.000209769	-1.3997
Fxa5Bg103321	2579.41	229.159	1165.54	0.000210882	-3.11626
Fxa7Dg101223	1526.85	601.833	898.045	0.000210882	-1.23236
Fxa5Dg202478	646.323	126.348	318.303	0.000211475	-2.1208
Fxa6Ag101565	415.501	163.052	278.552	0.000211475	-1.23942
Fxa2Bg203404	93.9288	12.1228	47.1982	0.000211542	-2.66065
Fxa2Cg200152	561.888	126.618	275.434	0.000211542	-1.94216
Fxa5Dg201116	275.419	1972.34	1145.4	0.000213203	2.55786
Fxa1Cg100336	529.669	45.7645	283.1	0.000214629	-3.16486
Fxa2Dg200260	128.477	33.321	78.9179	0.000215116	-1.7646
Fxa4Bg101914	121.262	0	51.4255	0.000215387	-0.209536
Fxa3Cg101351	302.438	23.0387	158.53	0.000216304	-3.3233
Fxa6Cg103130	60.5745	792.254	557.737	0.000216406	3.32201
Fxa4Ag100661	826.562	94.9718	350.853	0.000219305	-2.79681
Fxa4Bg100267	169.93	809.706	539.657	0.000219305	2.03217
Fxa5Dg201814	12.6477	59.5851	50.5221	0.000220117	2.02572
Fxa3Dg203507	445.755	119.321	249.416	0.000222176	-1.72226
Fxa5Bg101251	1161.68	23.0902	479.576	0.000222201	-5.02583
Fxa6Cg100053	9261.2	3763.55	5587.2	0.000222201	-1.19057
Fxa7Cg101897	3.66508	90.4795	85.9086	0.000223217	4.08575
Fxa3Ag104109	796.231	243.104	450.094	0.000224476	-1.5544
Fxa2Cg200057	89.6767	2.92603	32.7432	0.000224507	-4.40722
Fxa1Cg101523	251.298	20.9196	100.306	0.000225315	-3.20117
Fxa5Dg200021	330.78	45.6595	168.641	0.000225554	-2.5666
Fxa3Bg201904	104.013	43.1254	63.596	0.000225693	-1.16847
Fxa6Dg101340	759.483	368.765	519.736	0.000225956	-0.966046
Fxa1Bg202643	115.593	915.721	429.825	0.000226823	2.68373
Fxa5Bg100904	78.0967	3.32474	35.8552	0.000226823	-4.04847
Fxa2Bg201386	0	18.4423	9.0114	0.000228162	6.48069
Fxa6Bg102368	6.85303	46.9348	44.9253	0.000228162	2.44474
Fxa6Bg102051	545.404	271.908	399.706	0.000229456	-0.930033
Fxa6Cg103948	446.328	108.193	245.343	0.000229456	-1.84582
Fxa2Ag102418	599.49	185.727	314.044	0.000231805	-1.53693
Fxa1Cg100796	1.00841	178.791	100.668	0.000232002	6.58281
Fxa3Cg103441	518.714	262.315	349.097	0.000232041	-0.912466
Fxa4Cg202694	1437.71	450.501	770.733	0.000233214	-1.5207
Fxa6Ag101338	338.319	800.79	621.618	0.000234402	1.14492
Fxa4Ag102425	546.236	0.686619	249.985	0.000235075	-0.16601
Fxa6Ag100906	1.10565	43.0459	40.5533	0.000237117	4.70783
Fxa1Ag100556	85.1873	23.4112	44.6354	0.000237963	-1.6804
Fxa2Dg200808	1.74551	35.3962	19.1486	0.000237963	3.8426
Fxa4Dg100490	396.613	109.242	213.165	0.000237963	-1.68061
Fxa6Cg103334	13441.8	5349.88	8014.45	0.000237963	-1.21724
Fxa7Dg102627	128.001	21.3127	72.5544	0.000237963	-2.32292
Fxa7Bg200670	76.6637	234.176	191.799	0.000238056	1.46837
Fxa2Dg203268	388.131	65.3864	217.541	0.000238128	-2.31021
Fxa2Dg200922	89.9766	2.83444	29.5597	0.000238427	-4.43501
Fxa1Ag100048	196.755	692.102	573.157	0.000240665	1.64604
Fxa7Dg102768	171.625	76.5244	117.237	0.000241148	-1.07687
Fxa3Ag100737	62.0526	297.688	207.432	0.000245068	2.03348
Fxa5Ag201166	70.6871	232.263	187.065	0.000245068	1.55798
Fxa7Dg100621	2.2395	37.3034	37.069	0.000246436	3.51905
Fxa3Bg203220	3692.79	2082.64	2499.25	0.000249233	-0.774092
Fxa3Dg201402	2721.87	1241.8	1671.44	0.000249233	-1.04223
Fxa6Dg104439	20096.8	8373.03	12045.9	0.000250865	-1.15801
Fxa2Bg203751	39.5746	241.726	125.651	0.000251136	2.34696
Fxa4Ag100260	3.12247	81.7656	46.7548	0.000251136	4.16879
Fxa3Dg203129	696.22	301.636	442.194	0.000252293	-1.11071
Fxa2Cg202622	82.9984	14.8882	46.5724	0.000252577	-2.22507
Fxa3Bg200766	6130.85	1331.68	2895.23	0.000253977	-1.97947
Fxa6Cg101404	677.673	207.432	389.688	0.000253977	-1.54824
Fxa3Dg200616	0	20.6926	24.7482	0.000255126	6.59225
Fxa2Bg200868	126.88	42.5206	70.6912	0.000256628	-1.43886
Fxa3Ag101241	154.663	22.4114	76.0238	0.000256628	-2.49881
Fxa5Cg201806	4308.1	1229.03	2013.49	0.000256628	-1.6338
Fxa6Bg100300	1072.18	345.54	578.532	0.000256628	-1.48294
Fxa5Ag200031	396.338	54.5504	191.263	0.000256724	-2.56491
Fxa3Cg102745	296.603	129.818	211.04	0.000256765	-1.09316
Fxa7Bg202443	329.519	162.266	217.963	0.000257112	-0.94813
Fxa4Dg101008	573.298	190.978	335.162	0.000258265	-1.44106
Fxa6Ag101935	135.394	20.2174	62.8344	0.000258265	-2.46103
Fxa7Ag201525	77.557	9.67075	44.0115	0.000258265	-2.69837
Fxa7Dg100776	459.39	787.842	618.959	0.000258265	0.729593
Fxa2Ag103680	312.372	960.575	576.622	0.00025856	1.47272
Fxa1Ag101262	170.554	30.231	72.1344	0.000259364	-2.23612
Fxa5Dg200813	784.541	384.77	507.884	0.000259774	-0.95046
Fxa3Ag101282	417.814	68.4523	202.261	0.00026061	-2.34423
Fxa3Bg202185	1.79964	30.5483	33.5349	0.000260994	3.82527
Fxa6Cg102010	191.494	651.651	361.048	0.000261204	1.60048
Fxa2Dg200047	123.752	12.2571	82.9626	0.000261389	-2.99394
Fxa4Dg102608	52.7461	8.94453	30.1128	0.000261389	-2.28301
Fxa2Ag101668	518.498	242.387	321.978	0.000261946	-1.01416
Fxa6Dg100237	394.333	42.0272	203.566	0.000262343	-2.88797
Fxa4Bg102590	558.875	55.9212	256.259	0.000263772	-2.96549
Fxa3Ag104261	20.0311	116.799	137.309	0.000264883	2.27623
Fxa6Cg100925	60.0783	1.87666	22.5834	0.000264883	-4.49021
Fxa6Ag102400	40.4313	564.823	539.973	0.000265649	3.39976
Fxa1Dg200616	1109.12	443.324	664.357	0.000266065	-1.20895
Fxa4Bg101284	327.589	88.9219	182.849	0.000266111	-1.69923
Fxa6Dg101585	1118.98	546.569	737.409	0.000266111	-0.955782
Fxa6Cg104118	2246.15	112.728	1190.71	0.000266164	-3.83819
Fxa2Ag103761	726.252	230.553	377.346	0.000266828	-1.50004
Fxa4Cg202096	1403.78	120.251	562.337	0.000266828	-3.16158
Fxa3Ag100272	344.798	44.5149	143.233	0.000267526	-2.64152
Fxa6Dg102741	83.5034	471.411	438.015	0.000267732	2.24255
Fxa2Bg202679	1864.13	347.154	1233.09	0.000268139	-2.1701
Fxa5Cg201336	324.572	887.267	667.555	0.000268689	1.32498
Fxa3Dg201833	234.059	527.96	465.098	0.000269667	1.08115
Fxa4Dg101820	2050.49	204.206	952.83	0.000270135	-2.96798
Fxa1Bg202035	2.80805	42.3914	41.4561	0.000271196	3.54266
Fxa2Cg200569	167.566	15.0386	62.6408	0.000271519	-3.09835
Fxa6Dg103223	108.297	1619.2	1597.28	0.000271519	3.48681
Fxa5Ag200287	1258.39	235.1	661.837	0.000272146	-2.16952
Fxa6Ag103215	162.292	1656.51	1420.98	0.000272733	3.00018
Fxa7Ag202394	277.272	583.117	436.877	0.000272733	0.988479
Fxa6Dg101127	547.277	56.6819	205.536	0.000273274	-2.92244
Fxa2Ag100896	195.952	907.704	493.55	0.000273859	1.99101
Fxa7Cg101971	87.3928	11.4689	35.5282	0.000274223	-2.62804
Fxa4Ag101270	607.021	5.45652	256.939	0.000274863	-0.320479
Fxa2Ag100135	1236.07	532.278	870.452	0.00027564	-1.11401
Fxa1Cg100414	3.31793	47.507	31.92	0.000278271	3.42648
Fxa2Dg202929	469.195	76.0557	210.853	0.000278998	-2.34944
Fxa4Dg102261	179.5	364.86	322.471	0.000278998	0.944801
Fxa5Dg202310	137.782	13.7443	61.6948	0.000278998	-2.97164
Fxa5Bg100884	275.002	2.21997	103.2	0.000280593	-0.332329
Fxa3Cg100807	615.161	96.1587	268.837	0.000283626	-2.3966
Fxa4Cg202073	207.928	1.62495	129.231	0.000283944	-0.349263
Fxa2Ag101722	27.8585	134.711	92.0688	0.000284315	2.04544
Fxa7Bg202684	381.046	881.292	679.361	0.000284703	1.11518
Fxa2Bg201009	457.978	208.718	296.001	0.000285053	-1.04253
Fxa5Cg203005	2490	344.589	991.85	0.000285261	-2.54958
Fxa1Ag101056	134.939	7.12715	48.0937	0.000285533	-3.77594
Fxa2Bg203554	51.4171	257.311	276.94	0.000285533	2.0804
Fxa6Dg104064	287.314	48.2452	144.613	0.000288865	-2.30449
Fxa3Cg103390	1681.18	462.342	879.839	0.000289184	-1.68051
Fxa2Ag101904	199.492	58.9845	130.634	0.000289309	-1.58911
Fxa3Ag102751	1330.01	349.809	776.152	0.00029042	-1.73591
Fxa4Ag101906	111.545	26.1127	50.2042	0.000290977	-1.89701
Fxa7Bg200468	420.026	1001.51	787.396	0.000291097	1.15121
Fxa3Ag103769	31.2597	0.294231	18.8498	0.000293701	-5.89652
Fxa4Bg102081	479.473	1776.93	978.742	0.000293974	1.70708
Fxa3Bg203690	501.229	67.2531	283.863	0.000294033	-2.58608
Fxa5Cg200183	517.582	1342.23	1052.65	0.000295303	1.25597
Fxa3Dg200910	8580.58	2416.56	4438	0.000295499	-1.64713
Fxa5Bg102903	64.4156	808.334	644.18	0.000295555	3.25292
Fxa2Ag101629	950.378	7.01975	257.733	0.000295735	-0.272796
Fxa2Cg202280	966.862	6609.97	4918.13	0.000295735	2.48426
Fxa7Bg201238	83.2023	6.37201	32.4249	0.000295735	-3.31325
Fxa6Dg102311	9.72007	66.59	56.2256	0.00029587	2.45321
Fxa3Dg202838	943.922	181.276	459.913	0.000296716	-2.13516
Fxa4Cg200118	1360.74	280.602	601.075	0.000298665	-2.04264
Fxa4Cg201792	402.198	150.545	223.738	0.000298665	-1.29009
Fxa4Cg202078	8578.73	2164.74	4209.5	0.000299325	-1.79008
Fxa4Cg202973	140.718	60.5074	79.769	0.000299459	-1.11119
Fxa4Ag103066	100.471	440.515	390.943	0.000301843	1.91938
Fxa3Ag103306	800.289	147.439	461.335	0.000301885	-2.18849
Fxa5Bg103514	200.662	393.942	336.125	0.000302932	0.902291
Fxa5Cg200364	3382.33	632.316	1383.09	0.000303472	-2.16614
Fxa5Ag203644	1889.04	277.564	928.94	0.000303641	-2.4707
Fxa6Dg101935	180.795	27.7512	71.2017	0.000303781	-2.42944
Fxa5Ag201356	1800.48	564.861	918.119	0.000304702	-1.51172
Fxa6Dg100011	0	29.6877	11.9278	0.000304702	7.14989
Fxa7Bg202104	276.218	77.9897	152.568	0.000305241	-1.64667
Fxa2Ag102868	2535.37	606.01	1526.53	0.000305617	-1.85595
Fxa3Bg200525	2614.65	198.093	1182.6	0.000305617	-3.30672
Fxa5Bg100027	130.47	21.3489	68.4314	0.000305846	-2.3453
Fxa1Dg201051	2213.82	475.12	971.408	0.00030634	-1.99068
Fxa3Bg203459	7.23163	182.978	126.584	0.00030634	4.14283
Fxa7Dg100461	1979.53	1039.08	1384.52	0.000309089	-0.863476
Fxa1Bg200136	41.1772	4.54442	17.07	0.000309586	-2.85185
Fxa3Bg201407	12907.6	1712.25	5508.59	0.000309586	-2.58947
Fxa4Ag101114	350.489	16.5892	150.324	0.000309615	-3.90421
Fxa4Ag102520	60.8659	8.5621	31.837	0.000309615	-2.51815
Fxa6Ag104574	382.599	6.34577	155.679	0.000309615	-5.22927
Fxa7Cg100580	370.023	921.946	638.585	0.000309615	1.20448
Fxa6Cg100948	1359.24	469.881	745.239	0.000309774	-1.3905
Fxa7Cg100602	17.0771	82.7805	77.977	0.000310406	2.0309
Fxa7Ag201484	919.582	117.297	439.719	0.000310507	-2.64973
Fxa7Bg201015	51.8116	4.10296	19.4705	0.000310648	-3.26057
Fxa1Bg201037	242.534	21.9138	108.773	0.000311729	-3.08618
Fxa3Cg100426	3.02522	47.4193	69.4591	0.000312866	3.47282
Fxa4Dg102562	66.1096	7.13711	30.8027	0.000313324	-2.8832
Fxa6Dg104368	355.836	82.1476	192.719	0.000313324	-1.8988
Fxa1Dg200225	83.1028	12.4588	39.7956	0.000313364	-2.42828
Fxa3Ag100699	153.633	422.515	306.344	0.000313364	1.32636
Fxa6Bg100286	40.5441	6.55156	20.6352	0.000314838	-2.33477
Fxa1Ag101373	1458.33	3553.22	2899.08	0.00031494	1.17643
Fxa2Ag102819	4129.46	1651.49	2365.93	0.00031494	-1.20679
Fxa2Bg202726	680.013	3638.52	3004.71	0.00031494	2.17137
Fxa7Bg203022	171.99	67.0891	112.777	0.00031494	-1.24264
Fxa5Dg200355	1.69689	40.9802	16.8263	0.000317712	4.03404
Fxa6Bg100206	8.8585	57.1576	47.846	0.000317935	2.38316
Fxa1Bg202569	768.772	128.758	306.95	0.000317996	-2.30642
Fxa6Bg100801	359.556	154.728	219.089	0.000326222	-1.11249
Fxa2Ag103866	113.329	14.1007	55.1283	0.000329808	-2.68499
Fxa2Bg201599	251.775	35.1513	118.32	0.000329808	-2.533
Fxa2Bg202862	1223.38	413.353	872.535	0.000329808	-1.41477
Fxa3Bg203516	2376.01	1028.13	1467.89	0.000329808	-1.10581
Fxa1Ag101417	714.782	148.895	397.246	0.000330673	-2.02616
Fxa2Dg201537	126.579	29.4858	70.9744	0.000330901	-1.88841
Fxa2Ag102182	0.319929	30.3634	16.5265	0.000330943	5.5368
Fxa3Bg201732	191.628	506.748	360.125	0.000331551	1.28028
Fxa6Ag101267	83.8373	4.94337	33.0746	0.000333132	-3.64225
Fxa6Ag104079	536.352	2970.23	2016.06	0.000333132	2.21398
Fxa7Bg201798	141.949	13.7377	57.1812	0.000333132	-2.99965
Fxa3Bg201517	3.43656	36.7979	32.006	0.000334316	3.15178
Fxa3Cg102200	184.192	30.3814	92.8956	0.000336509	-2.32279
Fxa3Cg101217	395.791	184.541	287.027	0.000337625	-1.01232
Fxa4Cg202337	691.834	113.156	317.063	0.000339801	-2.33099
Fxa7Ag200002	128.699	17.4131	59.8998	0.000339801	-2.58955
Fxa2Bg203458	1412.95	208.519	715.405	0.000339833	-2.46109
Fxa6Cg101177	432.021	57.1428	164.575	0.000340116	-2.60385
Fxa4Cg203032	733.777	280.086	433.986	0.0003405	-1.26242
Fxa5Cg202027	17.9283	181.014	181.848	0.000340678	2.96362
Fxa6Ag104630	312.154	1096.81	728.27	0.000344237	1.63255
Fxa3Ag100352	76.4695	393.566	330.248	0.000344252	2.11542
Fxa1Cg101673	940.843	186.659	630.482	0.00034496	-2.08221
Fxa6Ag101685	249.549	17.3728	107.875	0.000347435	-3.40731
Fxa6Dg103836	69.6275	237.112	172.437	0.000348051	1.59611
Fxa4Cg201870	5080.26	1626.99	2715.48	0.000349059	-1.48481
Fxa4Ag102620	254.653	13.8877	139.628	0.000349129	-3.71607
Fxa3Cg100871	22.2086	223.465	184.483	0.000350673	2.95515
Fxa3Dg201404	355.751	52.8139	229.06	0.000350673	-2.45719
Fxa6Ag104824	1189.44	442.784	813.427	0.000350673	-1.29736
Fxa6Ag100808	1.91957	35.2737	30.7761	0.000351905	3.62123
Fxa5Ag200940	103.569	5.27648	48.0183	0.000352125	-3.79539
Fxa7Bg202004	249.598	1117.85	906.743	0.00035318	1.94271
Fxa2Bg200336	455.784	32.1312	177.43	0.00035401	-3.39233
Fxa2Dg201170	759.399	199.987	370.037	0.000354106	-1.73084
Fxa3Ag100919	159.512	7.54237	82.5745	0.00035516	-3.90464
Fxa2Dg202511	55.1302	1.02993	27.3689	0.00035589	-5.19485
Fxa2Bg202921	86.7412	565.538	365.931	0.000356856	2.41406
Fxa3Ag101318	0	15.5165	10.7453	0.000356856	6.15559
Fxa2Dg201851	315.365	64.025	187.683	0.00035769	-2.0556
Fxa4Ag102656	1118.76	94.1734	444.786	0.000357982	-3.16385
Fxa3Bg201280	219.378	931.034	887.95	0.000358731	1.87205
Fxa1Cg100990	798.697	2.6318	344.115	0.000359981	-0.188839
Fxa1Bg200820	719.184	170.576	375.357	0.00036149	-1.86116
Fxa5Bg103352	50.1576	4.54442	35.5344	0.00036149	-3.09748
Fxa3Bg202545	1440.44	3089.24	2593.92	0.000363849	1.00669
Fxa5Ag202783	859.813	416.268	551.034	0.000364149	-0.964377
Fxa6Cg101562	47.7962	5.66231	17.8588	0.000365514	-2.7221
Fxa5Cg201842	100.104	780.218	421.799	0.000366	2.64432
Fxa1Cg100277	55.6326	1.23256	19.6647	0.000366915	-4.9015
Fxa3Bg202888	633.092	88.4987	275.815	0.000366915	-2.52517
Fxa6Dg102988	3890.88	531.409	1811.43	0.000367058	-2.54944
Fxa5Dg200444	159.405	16.396	66.3815	0.000368558	-2.92367
Fxa6Ag101413	92.6313	5.06073	36.4966	0.000370428	-3.70522
Fxa1Bg202482	154.964	12.8779	63.1231	0.000372664	-3.18421
Fxa3Dg202785	1867.51	507.754	897.225	0.000372664	-1.69456
Fxa5Bg102206	171.925	24.5597	70.7468	0.00037308	-2.50622
Fxa6Bg101035	102.206	598.452	546.951	0.000373308	2.27841
Fxa2Bg203164	594.125	261.176	361.455	0.000374123	-1.08657
Fxa7Bg200449	353.024	5.39456	105.621	0.000375372	-5.31547
Fxa6Dg101570	92.8459	8.95473	37.6789	0.00037602	-3
Fxa6Bg102048	141.195	24.4768	63.8199	0.0003769	-2.24739
Fxa7Bg202447	413.581	37.4854	167.767	0.000376977	-3.07085
Fxa2Cg200279	512.399	74.3178	238.264	0.000377575	-2.47982
Fxa2Dg203294	512.126	47.044	230.803	0.000380255	-3.05447
Fxa3Ag102916	1194.88	129.641	565.27	0.000380517	-2.84341
Fxa5Cg202071	379.166	56.3179	154.137	0.000381183	-2.45093
Fxa4Bg103240	624.389	285.29	400.991	0.000383023	-1.0355
Fxa3Dg203393	330.95	64.5	166.848	0.000383111	-2.10715
Fxa3Dg200161	16730.3	1186.88	6375.97	0.000386784	-3.37372
Fxa2Cg200498	153.544	7.99988	63.9323	0.000386973	-3.76633
Fxa3Ag101135	93.9722	38.0481	72.2429	0.000387676	-1.19167
Fxa3Bg200691	75.6086	308.886	237.98	0.000388698	1.81624
Fxa2Bg201563	880.052	234.078	487.475	0.000392399	-1.7177
Fxa6Bg103301	851.683	126.374	391.909	0.000394731	-2.44783
Fxa3Bg200170	7.40569	49.0652	34.7598	0.000394838	2.43489
Fxa2Dg202934	52.2518	1.37324	18.2059	0.000394966	-4.73221
Fxa1Cg102641	2393.52	591.01	1196.61	0.000395917	-1.80597
Fxa3Ag100564	45645.5	3513.79	18144.4	0.000396898	-3.2684
Fxa1Dg201122	964.575	305.451	486.454	0.000398011	-1.49622
Fxa5Cg200395	20.6352	232.814	253.541	0.000398643	3.09811
Fxa2Bg201669	86.8327	19.3017	46.4241	0.000399352	-1.93341
Fxa5Bg102320	11.8079	102.613	84.0857	0.000399352	2.75886
Fxa1Cg100987	276.688	28.7635	121.742	0.000399415	-2.89951
Fxa1Cg102104	146.501	69.6648	99.2467	0.000399685	-0.982164
Fxa3Cg101999	128.701	51.7261	78.6875	0.000400246	-1.19135
Fxa2Bg200949	26.134	2.27537	15.2104	0.000400311	-3.10165
Fxa2Dg203048	856.615	247.369	479.344	0.000402112	-1.61069
Fxa2Dg202654	324.205	58.0269	173.341	0.000402564	-2.21275
Fxa6Ag103580	2387.12	7585.49	6022.34	0.000403278	1.50558
Fxa6Dg100053	15237.4	5384.71	8778.51	0.000405437	-1.35999
Fxa3Ag101948	154.577	31.837	103.121	0.000406114	-2.04189
Fxa4Cg202934	210.05	18.4622	99.2835	0.000406114	-3.11414
Fxa6Dg102721	256.338	1.09845	80.4963	0.000406114	-0.243659
Fxa3Bg200843	599.276	263.138	421.694	0.000407669	-1.08634
Fxa6Cg103858	281.665	1360.89	706.906	0.000407669	2.03312
Fxa5Bg101695	49.7507	233.808	202.751	0.000409344	1.99629
Fxa1Ag102120	1520.98	499.918	946.958	0.000415071	-1.4527
Fxa3Bg200257	33.3621	0.251713	12.2437	0.000415545	-5.98323
Fxa4Bg103314	1576.35	808.908	1086.71	0.000417169	-0.890282
Fxa7Bg202473	29.9501	158.674	128.456	0.000418931	2.14335
Fxa4Bg100117	1.74551	39.244	40.3457	0.000419806	3.92541
Fxa5Ag200192	129.928	1139.11	1031.87	0.00042069	2.7837
Fxa4Dg102818	690.53	271.839	429.476	0.00042102	-1.22182
Fxa3Bg200840	903.111	309.969	513.227	0.000421169	-1.39427
Fxa6Ag104216	193.849	77.9171	113.764	0.000421169	-1.19624
Fxa6Bg102980	184.544	47.3894	113.437	0.000421169	-1.76449
Fxa7Ag202582	1503.82	12685.4	6628.52	0.000426022	2.74611
Fxa7Ag203107	852.579	3234.71	2106.57	0.000426032	1.72072
Fxa2Ag100091	128.317	12.0545	66.206	0.000427627	-3.03415
Fxa4Cg201133	2660.75	72.9385	1036.62	0.000427627	-4.56038
Fxa7Ag200167	145.721	12.338	63.9355	0.000428475	-3.14695
Fxa1Dg200115	41.9797	170.764	114.081	0.000429126	1.81177
Fxa2Dg200275	35.6431	0.98085	18.39	0.000429126	-4.68637
Fxa7Cg101593	99.129	13.5315	47.7803	0.000429126	-2.54886
Fxa6Cg100085	461.571	5134.63	3948.64	0.000430685	3.08467
Fxa4Bg100662	593.098	74.8992	259.407	0.000431346	-2.64669
Fxa7Bg202288	92.5143	26.9553	50.9676	0.000431346	-1.59552
Fxa6Cg100671	743.731	302.424	480.715	0.000431521	-1.18137
Fxa6Ag105122	52.3614	1.8701	22.3955	0.000431675	-4.27831
Fxa7Cg101643	911.175	157.682	407.551	0.000431675	-2.25051
Fxa5Cg202591	156.864	14.1075	84.6532	0.000432834	-3.08562
Fxa2Dg203463	61.0267	2.6974	24.8559	0.000435311	-4.02948
Fxa1Dg202699	2665.8	795.832	1504.26	0.000435884	-1.56625
Fxa5Cg201351	1013.64	289.223	561.037	0.000436999	-1.62425
Fxa5Dg202271	170.721	47.7089	85.8334	0.000436999	-1.65035
Fxa6Bg100703	651.442	166.803	353.067	0.000440018	-1.76001
Fxa3Cg100597	61.7398	11.354	32.1098	0.00044079	-2.16666
Fxa5Cg200312	0.319929	23.6704	17.1274	0.00044079	5.17863
Fxa1Cg101929	156.598	33.8925	90.0371	0.000441578	-1.96607
Fxa7Ag200152	68.9948	0.251713	21.8386	0.000441578	-6.9092
Fxa6Ag102514	867.842	101.052	381.865	0.000444525	-2.74628
Fxa6Ag103243	43.8115	104.005	100.974	0.000447419	1.15553
Fxa5Bg101883	6304.28	2920.44	3936.27	0.000448103	-1.01634
Fxa2Ag101879	159.984	28.7467	74.2057	0.00044905	-2.20548
Fxa6Dg100859	6836.66	1226.28	3396.63	0.00044905	-2.20629
Fxa3Bg200286	143.185	10.1905	70.2783	0.000453401	-3.37106
Fxa3Cg101590	257.819	95.6191	136.999	0.000453729	-1.29532
Fxa6Bg103967	117.349	9.36996	49.5133	0.000455036	-3.23042
Fxa5Bg103325	36.3734	0	12.8089	0.000456065	-0.469272
Fxa1Dg200255	786.579	330.663	516.954	0.000456803	-1.13722
Fxa6Cg104252	2.33674	46.2881	49.7873	0.000456814	3.74305
Fxa5Dg201850	5128.44	1532.35	2395.65	0.000457597	-1.56594
Fxa6Dg104411	32.965	135.324	118.513	0.000458225	1.81945
Fxa3Ag100159	4793.3	1612.09	2491.37	0.000458909	-1.411
Fxa5Dg202889	117.123	388.186	280.008	0.000458909	1.55513
Fxa3Bg201809	0	18.0407	15.9971	0.000459652	6.3398
Fxa6Bg103829	834.728	15.3272	336.825	0.000459652	-5.06223
Fxa3Ag102694	2.60805	34.4398	38.0788	0.000463361	3.20285
Fxa3Cg101972	72.7743	193.072	157.346	0.000463361	1.27202
Fxa2Cg203509	1973.47	152.243	1027.08	0.000463745	-3.25785
Fxa6Cg103862	918.162	235.118	489.848	0.000464781	-1.75806
Fxa1Dg200916	207.845	31.4733	89.1074	0.000465575	-2.41553
Fxa6Ag102649	43.1113	388.492	370.036	0.000465739	2.80957
Fxa7Ag201660	6.83617	151.478	223.979	0.000467509	3.91898
Fxa4Ag103362	733.841	1778.16	1225.52	0.000471264	1.16353
Fxa4Dg102787	862.905	368.086	523.163	0.000473377	-1.12049
Fxa5Bg102349	545.294	248.402	344.126	0.000475024	-1.03765
Fxa5Ag202946	46.4513	0	15.9475	0.000475438	-0.333952
Fxa7Dg100763	2611.23	40.4902	1053.57	0.000475438	-0.407247
Fxa6Bg101408	547.194	263.928	391.628	0.000475815	-0.96797
Fxa1Dg200406	121.546	670.018	466.192	0.00047618	2.19199
Fxa2Ag103685	104.595	27.4004	56.4054	0.000476327	-1.73873
Fxa2Bg202031	255.978	43.9396	120.191	0.000476474	-2.26011
Fxa4Dg102863	156.984	51.3899	91.3606	0.000476894	-1.44947
Fxa1Bg202005	1114.11	353.93	652.547	0.000479751	-1.48799
Fxa4Dg102156	343.207	92.2686	177.206	0.000480352	-1.69486
Fxa6Bg104191	650.307	34.1899	264.272	0.000480352	-3.73262
Fxa3Ag100685	128.561	35.341	70.8728	0.000483565	-1.66617
Fxa2Bg203370	1821.05	49.7173	667.791	0.000484139	-4.55439
Fxa6Ag104196	482.638	1139.93	785.965	0.000484139	1.13308
Fxa6Ag104653	146.794	19.1452	71.3664	0.000487934	-2.60294
Fxa2Dg201589	158.49	44.9066	101.312	0.000488301	-1.62574
Fxa3Ag102661	220.355	432.021	330.095	0.000489431	0.893171
Fxa7Cg102595	165.629	23.771	68.9846	0.000489624	-2.47921
Fxa1Bg200537	62.4034	5.00533	24.6744	0.000493176	-3.21624
Fxa1Cg100427	260.194	38.2347	122.985	0.000493288	-2.45311
Fxa7Ag200040	197.509	14.9018	73.959	0.000495091	-3.29116
Fxa2Cg201010	361.53	88.824	215.037	0.000496144	-1.80896
Fxa2Cg202513	73.9085	186.769	131.151	0.000497998	1.21965
Fxa2Bg202500	511.904	160.558	342.864	0.000501106	-1.50396
Fxa5Ag203520	269.251	1210.01	908.71	0.000502109	1.9332
Fxa1Bg200154	1344.58	230.912	651.895	0.000503488	-2.25403
Fxa1Cg100201	1990.87	19.2519	811.314	0.000503988	-0.282913
Fxa3Ag101531	132.319	9.15081	80.2255	0.000503988	-3.39955
Fxa5Dg200937	352.916	1804.39	1418.97	0.000503988	2.09674
Fxa5Dg200332	52.0194	9.11485	21.7342	0.000504137	-2.22932
Fxa6Bg103961	334.134	1500.42	759.064	0.000504137	1.93581
Fxa7Dg102674	195.043	9.13793	69.4447	0.000504172	-3.88587
Fxa1Bg200389	38.8067	2.03678	22.4152	0.00050476	-3.7575
Fxa4Cg201955	400.606	26.5121	160.895	0.000505242	-3.45374
Fxa4Cg202655	275.68	713.093	533.672	0.000505267	1.24353
Fxa3Dg203657	3.7137	44.2766	41.6781	0.000506577	3.1103
Fxa1Dg200716	497.936	8.66414	177.929	0.000507295	-0.507803
Fxa6Cg101518	75.63	6.69224	32.3595	0.000507837	-3.08539
Fxa3Dg203121	1017.65	178.853	401.328	0.000513383	-2.22618
Fxa1Cg101306	4196.69	1205.76	2084.85	0.000514931	-1.6087
Fxa2Cg200590	511.723	157.337	281.377	0.000514931	-1.52662
Fxa5Dg200256	330.988	55.7158	167.233	0.000515351	-2.27959
Fxa7Dg102737	1104.03	443.47	631.745	0.000515351	-1.1934
Fxa2Cg200517	47.4169	14.2086	39.4847	0.000515696	-1.57999
Fxa4Cg201612	25.8627	384.621	401.935	0.000515696	3.4288
Fxa1Ag102770	680.719	310.403	458.265	0.000516983	-1.03353
Fxa6Cg100261	480.475	26.9407	247.093	0.000517494	-3.65965
Fxa7Dg101567	104.867	5.2274	38.1864	0.000517763	-3.79159
Fxa6Ag100449	247.251	29.532	110.464	0.000519333	-2.70977
Fxa2Ag103982	107.087	10.6582	49.5236	0.00051992	-2.94857
Fxa1Dg201912	446.004	182.285	267.385	0.000521295	-1.17543
Fxa6Dg103638	67.4214	236.174	202.704	0.000521295	1.61745
Fxa2Dg201743	6098.69	2092.79	3408.8	0.000521787	-1.39127
Fxa2Bg202078	3201.96	1454.45	2072.24	0.000521866	-1.0413
Fxa5Ag200511	643.43	168.686	363.757	0.000524247	-1.72412
Fxa7Dg101487	22.5438	285.536	151.993	0.00052431	3.23321
Fxa5Dg200925	1084.5	576.185	705.575	0.000525084	-0.842923
Fxa1Bg201591	602.117	97.3735	270.217	0.000525816	-2.32891
Fxa6Ag103948	86.374	15.464	45.1821	0.000525816	-2.20815
Fxa4Ag103155	13.9365	0	7.52973	0.000526199	-6.50265
Fxa7Ag202568	944.68	1699.76	1385.88	0.000527458	0.787847
Fxa2Ag102490	261.543	37.9461	122.224	0.000530164	-2.46124
Fxa2Dg202895	1.66966	40.9858	31.1295	0.000530182	4.15307
Fxa6Dg101240	133.132	14.2606	56.9863	0.000530182	-2.84281
Fxa5Bg101376	11.1466	59.3287	50.2747	0.000530288	2.11312
Fxa2Cg200587	349.508	52.5537	143.773	0.000530805	-2.41629
Fxa6Cg103839	261.242	69.136	163.182	0.000530805	-1.71679
Fxa6Cg100423	0	15.0094	27.9458	0.000531764	6.05046
Fxa4Cg203012	183.458	61.6328	100.936	0.000532867	-1.41475
Fxa6Ag102826	1815.08	842.338	1152.73	0.000532867	-1.01167
Fxa7Ag200949	44.4961	1.19004	17.0436	0.000533891	-4.61837
Fxa7Ag200090	858.451	7.96392	307.689	0.000534191	-0.279851
Fxa1Bg200796	3.85957	235.435	188.25	0.000537378	5.17232
Fxa2Ag101780	48.0824	164.131	142.847	0.000537587	1.59615
Fxa3Bg203491	62.3489	8.78806	33.2121	0.000538779	-2.5144
Fxa6Dg101447	112.816	10.1577	50.3505	0.00053935	-3.06263
Fxa5Bg101830	127.679	5.09037	49.4655	0.000539543	-4.0864
Fxa4Dg100127	1039.66	297.749	498.759	0.00054057	-1.61411
Fxa6Dg102889	196.863	775.096	502.428	0.000541712	1.76851
Fxa3Bg202184	3.21971	43.4572	63.5821	0.000541767	3.28279
Fxa2Cg203277	713.638	260.615	391.619	0.000543782	-1.312
Fxa6Cg101831	106.366	15.8856	53.2481	0.000543782	-2.42704
Fxa2Bg203109	3609.84	1485.69	2035.03	0.000544039	-1.16118
Fxa6Cg102622	91.6375	300.083	211.261	0.000544039	1.53668
Fxa4Cg201128	2023.57	519.42	1110.79	0.000545032	-1.74864
Fxa7Cg102696	147.719	19.1712	58.5492	0.000545032	-2.60467
Fxa1Bg201173	111.931	18.6187	43.3283	0.000546767	-2.29092
Fxa7Bg202628	205.247	22.9704	83.7279	0.000547641	-2.78846
Fxa3Bg202328	161.21	36.7172	86.741	0.000552412	-1.89617
Fxa4Cg202593	4.69488	49.4789	41.4238	0.000552564	2.98578
Fxa4Cg200613	2313.22	985.62	1377.8	0.000553502	-1.11823
Fxa6Cg102138	1.00841	35.739	12.4723	0.000554695	4.47638
Fxa4Bg103129	883.832	215.83	365.856	0.000554866	-1.81078
Fxa3Dg203630	2059.41	137.513	665.268	0.000555683	-3.42488
Fxa3Bg201191	10.4899	54.0676	52.817	0.000556983	2.0713
Fxa7Bg200933	456.304	29.7866	246.855	0.000556983	-3.4611
Fxa6Bg103912	495.394	131.13	404.483	0.000557653	-1.71377
Fxa3Bg201164	227.014	43.9935	131.016	0.000560467	-2.10449
Fxa6Bg103602	58557.8	5254.58	21490	0.000563219	-3.05421
Fxa6Cg102517	227.369	42.4426	116.434	0.000563219	-2.14821
Fxa4Bg100595	511.877	114.074	247.689	0.00056607	-1.92328
Fxa1Ag101142	857.434	53.3496	325.916	0.000568708	-3.51693
Fxa6Bg100117	971.763	3.20082	357.648	0.000568708	-0.172194
Fxa3Ag101957	96.9664	287.724	226.046	0.000571647	1.41111
Fxa6Bg103573	44.9311	159.941	96.9948	0.000572455	1.63541
Fxa2Cg203269	143.53	324.679	272.67	0.000573027	1.07259
Fxa7Dg102795	477.411	125.476	243.389	0.000576949	-1.71735
Fxa4Bg102246	557.63	35.3655	241.094	0.000578179	-3.49411
Fxa4Dg100793	70.3043	189.184	149.981	0.000580253	1.2819
Fxa6Bg103402	260.209	1467.48	819.055	0.000581678	2.21587
Fxa7Ag202909	896.299	154.355	435.94	0.00058281	-2.24437
Fxa1Bg201235	27299.3	8574.09	14573.3	0.000587906	-1.49622
Fxa3Bg200403	206.536	28.9783	92.9542	0.000588887	-2.49487
Fxa4Dg102472	104.484	28.5147	58.9734	0.000589225	-1.6694
Fxa4Dg102213	4513.23	83.4321	1890.05	0.000592927	-0.458859
Fxa3Ag104186	2.6181	45.2154	61.673	0.000594171	3.70345
Fxa7Ag200351	968.785	3980.83	3089.43	0.000597042	1.81675
Fxa3Ag103782	135.95	7.48334	63.1632	0.000597177	-3.66905
Fxa2Ag103073	476.624	259.145	317.005	0.000598592	-0.812427
Fxa1Ag101738	6239.97	3517.08	4409.3	0.000600233	-0.765469
Fxa7Cg101466	1144.01	389.119	580.285	0.000602078	-1.39667
Fxa2Ag103549	2666.58	798.055	1367.61	0.000602703	-1.5559
Fxa1Dg200489	42.475	3.9494	14.8116	0.000603093	-3.03552
Fxa3Dg200822	15.8836	178.601	159.346	0.000603093	3.06165
Fxa2Dg200886	50.3076	6.60404	24.8729	0.000603314	-2.59073
Fxa4Ag101987	84.4185	0	39.1112	0.000603314	-0.203852
Fxa6Ag100674	31357.5	3034.14	13611.9	0.000605646	-2.90388
Fxa6Cg101968	62.2215	8.76862	27.7004	0.000606527	-2.52193
Fxa2Bg203488	404.403	202.688	248.001	0.000607439	-0.917157
Fxa2Bg200224	676.437	135.198	364.335	0.000609359	-2.05815
Fxa5Ag200737	126.641	32.2323	76.5731	0.000609359	-1.76214
Fxa5Ag200217	114.738	9.63771	58.4546	0.000610123	-3.1341
Fxa2Dg200462	8.12496	77.4523	136.267	0.000612803	2.86183
Fxa5Bg100315	207.132	65.0003	105.794	0.000612803	-1.49937
Fxa1Ag101079	42.5525	10.8377	24.2659	0.000615759	-1.75651
Fxa2Dg203419	1020.49	9359.77	4928.34	0.00061745	2.82589
Fxa2Ag101467	979.078	312.097	554.685	0.000618796	-1.48009
Fxa3Cg103387	2.2395	75.6334	57.0196	0.000620799	4.38621
Fxa2Cg200158	99.7385	6.24153	37.9808	0.000625271	-3.53097
Fxa4Ag101189	31.473	1.52679	11.1853	0.000625271	-3.86363
Fxa3Dg201812	96.6964	8.80457	45.6745	0.000627151	-3.0535
Fxa1Cg100533	101.319	20.4497	62.0226	0.000627692	-2.05014
Fxa3Cg103078	1663.69	678.574	1155.29	0.000628597	-1.17164
Fxa2Bg201543	634.16	36.5578	244.166	0.000629075	-3.60438
Fxa3Ag102303	53.2703	5.25048	25.4957	0.000629075	-2.93565
Fxa6Bg104518	605.727	135.818	281.053	0.000629075	-1.91498
Fxa4Bg102382	7986.06	2066.3	3769.99	0.000629322	-1.73994
Fxa3Bg201681	335.572	167.901	252.914	0.000629973	-0.918201
Fxa6Ag103395	291.877	106.493	172.425	0.000629973	-1.30795
Fxa7Cg102349	287.845	100.479	171.674	0.000633259	-1.36622
Fxa7Bg202523	1689.18	269.755	670.416	0.000633415	-2.33436
Fxa5Ag200744	104.296	4.73418	80.2122	0.000634749	-3.9275
Fxa6Bg104306	646.513	111.111	283.183	0.000634854	-2.2478
Fxa3Cg100662	42.8883	157.954	111.018	0.000635959	1.67373
Fxa2Ag101657	122.09	809.567	529.434	0.000638419	2.41107
Fxa3Ag101319	0	11.269	10.4497	0.00064237	5.63862
Fxa3Ag101339	382.941	1309.71	879.148	0.000642459	1.58641
Fxa3Dg201547	363.184	99.1799	165.409	0.000642763	-1.67105
Fxa7Dg101272	182.387	5.62343	59.9549	0.000643276	-4.39135
Fxa1Ag102491	70.1384	20.6195	49.6153	0.000647984	-1.58384
Fxa7Dg102501	601.229	227.983	375.59	0.000648004	-1.26012
Fxa3Bg202880	65.5903	317.219	268.878	0.000648791	2.01818
Fxa4Dg100830	1954.06	386.213	936.541	0.000651762	-2.068
Fxa7Cg102227	390.946	120.035	208.257	0.000653358	-1.5267
Fxa3Bg202336	216.965	10.3246	91.9124	0.000654741	-3.84538
Fxa4Bg102996	104.761	18.4255	59.795	0.000654741	-2.21482
Fxa6Bg102589	2140.38	918.822	1331.4	0.000654741	-1.10813
Fxa5Dg200774	84.6201	18.6313	37.4816	0.000656605	-1.9257
Fxa6Ag103724	72.6505	1027.89	1013.89	0.000656605	3.34524
Fxa3Bg200618	97.0276	25.3564	47.6131	0.000657372	-1.7128
Fxa3Ag101316	1.69689	25.7495	14.355	0.000660249	3.38249
Fxa5Bg100862	329.036	57.7376	196.06	0.000660249	-2.21445
Fxa5Ag200888	1055.4	469.374	618.475	0.000660455	-1.05247
Fxa5Dg200048	41.5344	204.569	161.28	0.000662375	2.02735
Fxa2Dg201423	125.159	866.342	620.072	0.000663277	2.46484
Fxa2Dg203332	960.589	157.072	441.223	0.000663277	-2.30856
Fxa4Bg102267	1215.47	595.937	829.469	0.000663561	-0.942514
Fxa4Dg102114	384.621	38.5022	162.541	0.000663561	-2.91297
Fxa2Dg201717	93.734	10.8343	38.2606	0.000663883	-2.73006
Fxa3Cg103788	23.7944	95.4771	87.5539	0.000664254	1.77422
Fxa1Bg200453	413.574	49.1725	188.958	0.00066687	-2.70409
Fxa3Cg102518	1137.68	141.088	532.105	0.00066687	-2.64582
Fxa5Bg101483	307.481	111.782	201.897	0.000667051	-1.30983
Fxa5Cg201747	91.0397	26.9228	58.8503	0.000667295	-1.57231
Fxa1Dg201009	154.087	15.4701	63.7928	0.000667606	-2.90844
Fxa6Cg103076	1306.42	133.856	602.421	0.000668651	-2.88389
Fxa3Bg202691	6160.12	19356.9	13656.3	0.000669058	1.48138
Fxa3Dg202253	161.59	37.6623	101.534	0.000669459	-1.86375
Fxa1Dg200971	47.3952	143.875	80.7911	0.000672113	1.44441
Fxa2Ag103724	434.143	47.4779	217.398	0.000672113	-2.80711
Fxa5Cg203126	1.37696	24.9064	23.5137	0.000675062	3.60495
Fxa7Ag202283	141.789	735.246	528.155	0.000678405	2.10146
Fxa7Dg101909	18.4635	233.588	126.662	0.000681084	3.20613
Fxa2Ag102031	17361.1	6702.63	10131.8	0.000681332	-1.24162
Fxa4Ag100592	777.745	194.418	386.831	0.000682075	-1.77523
Fxa3Bg200508	187.583	56.8359	94.4182	0.000683626	-1.53403
Fxa3Dg200763	193.076	15.0002	86.2746	0.000683626	-3.23903
Fxa4Cg202648	457.013	67.3799	210.182	0.000686747	-2.42801
Fxa2Ag100302	1041.93	227.421	566.445	0.000687504	-1.94386
Fxa3Ag101760	18.1384	0	7.9447	0.000688637	-6.86567
Fxa6Ag103003	342.986	128.994	210.588	0.000688637	-1.27118
Fxa6Ag104171	331.498	664.66	536.542	0.000688637	0.923063
[truncated: 99,845 more rows]

## Sheet: C. fructicola infection 96 hpi
	baseMean_control	baseMean_inoc96	baseMean	p-value (adj)	resLFC
Fxa6Bg102929	36.846	1046.49	480.82	2.79e-68	4.79088
Fxa4Ag102889	115.559	4899.73	1856.72	7.58e-46	5.35553
Fxa6Cg101468	415.409	57636.9	18167.7	6.61e-42	7.05522
Fxa3Bg202427	71.5571	4700.87	1773.36	1.84e-36	5.97697
Fxa4Cg200577	358.679	43360	13669.2	1.04e-35	6.83516
Fxa3Cg102355	256.043	14254.4	5075.84	3.68e-34	5.73186
Fxa3Ag102739	587.882	36990.3	14081.9	5.61e-30	5.89958
Fxa7Dg102540	118.957	12652.1	4384.7	5.91e-28	6.6343
Fxa6Ag101738	664.142	96532.7	30768.9	6.03e-28	7.09077
Fxa4Ag100250	525.262	13493.4	5047.11	8.04e-28	4.6165
Fxa6Dg101386	244.392	16281	5141.4	8.04e-28	5.9729
Fxa7Ag203342	66.6253	1493.1	665.032	7.39e-26	4.41059
Fxa7Cg101390	9.82282	231.782	117.613	3.17e-25	4.46551
Fxa2Ag100165	9.19399	1016.74	376.626	1.66e-24	6.71361
Fxa3Ag102499	66.6042	6294.71	2114.98	4.69e-24	6.44826
Fxa5Dg202353	197.613	5121.64	2148.2	2.61e-23	4.61623
Fxa3Bg202425	5.72469	701.077	243.391	4.24e-23	6.8316
Fxa7Dg102851	7.67051	3920.05	1401.7	6.5e-23	8.80484
Fxa2Cg201273	6.31592	357.979	133.963	6.5e-23	5.71989
Fxa3Bg201202	45.5936	889.356	378.742	1.28e-22	4.22064
Fxa3Dg203567	7.11299	2838.53	937.954	2.5e-22	8.45909
Fxa2Cg201453	76.4627	9854.31	3468.89	4.07e-22	6.88681
Fxa6Ag104069	17.2389	377.746	150.799	2.05e-21	4.34814
Fxa3Cg101421	57.2637	5862.11	1725.53	4.56e-21	6.56101
Fxa7Dg101018	1.45832	1315.58	403.25	3.18e-20	9.5882
Fxa1Dg200658	9.42705	739.741	405.743	3.78e-20	6.1686
Fxa7Bg203106	24.6449	5060.91	2170.29	4e-20	7.51218
Fxa7Cg102728	71.6621	5365.68	1862.1	4.41e-20	6.09698
Fxa1Dg200408	51.6045	1679.31	749.749	1.31e-19	4.91517
Fxa6Dg102753	262.713	3837.93	1752.27	1.92e-19	3.78875
Fxa1Bg200907	9.64876	478.497	170.492	3.49e-19	5.51077
Fxa3Ag102014	66.1812	2211.25	933.658	5.36e-19	4.95651
Fxa2Ag103687	643.077	133.609	318.283	7.34e-19	-2.21702
Fxa2Cg201454	248.577	29236	10098.9	7.45e-19	6.72099
Fxa6Bg101053	246.722	2004.63	913.62	1.25e-18	2.95979
Fxa1Dg200240	18.9912	819.605	308.922	1.28e-18	5.28725
Fxa7Ag201704	46.8668	8725.88	3127.46	1.4e-18	7.36332
Fxa5Cg202100	99.7008	800.573	379.857	1.51e-18	2.9376
Fxa1Dg200965	1.4742	1870.38	503.175	2.69e-18	10.0574
Fxa2Bg202234	1.96819	1221.07	366.024	4.55e-18	8.95854
Fxa7Ag202910	84.0334	5765.25	2076.23	4.84e-18	5.96712
Fxa1Dg200846	10.9408	315.144	104.801	6.73e-18	4.71011
Fxa5Ag200786	594.898	54.1374	264.455	7.41e-18	-3.37314
Fxa3Ag103446	126.53	953.524	408.48	1.75e-17	2.84905
Fxa2Ag103060	33.328	1004.34	383.246	1.75e-17	4.79368
Fxa5Dg200564	1498.14	415.098	834.599	1.92e-17	-1.81345
Fxa1Dg200132	338.562	6958	2415.21	2.09e-17	4.26333
Fxa5Ag201818	102.204	5977.86	2926.93	2.35e-17	5.72217
Fxa6Bg103074	20.431	710.536	365.988	3.24e-17	5.01101
Fxa6Bg104039	29.344	281.67	121.975	3.66e-17	3.18182
Fxa1Cg100417	111.433	3903.61	1706.24	3.98e-17	5.00851
Fxa7Ag201604	8610.3	2356.35	4866.24	4.11e-17	-1.83028
Fxa1Ag100970	40.8977	659.028	268.966	4.11e-17	3.90557
Fxa4Dg102657	397.384	83.872	227.165	5.54e-17	-2.19296
Fxa7Ag200996	14.9994	289.494	113.14	1.03e-16	4.15724
Fxa7Dg102114	9330.6	1519.81	3443.6	1.12e-16	-2.55755
Fxa3Bg200514	267.57	23392.1	8010.95	1.14e-16	6.29654
Fxa6Cg100199	28.1823	824.827	374.383	1.19e-16	4.74289
Fxa7Bg201584	874.627	44.9719	294.489	1.99e-16	-4.1782
Fxa3Ag102812	36.8949	3336.78	1329.07	2.26e-16	6.32911
Fxa7Dg101065	19.5983	804.681	289.987	4.48e-16	5.20032
Fxa3Dg201720	26.7298	1932.51	778.838	5.66e-16	6.03066
Fxa2Dg201248	11.3557	265.679	100.581	5.94e-16	4.46226
Fxa4Dg102390	858.823	146.552	426.506	7.51e-16	-2.49287
Fxa5Ag202536	108.859	924.408	460.469	9.24e-16	3.00881
Fxa5Ag200169	2955.41	52745.7	20807.5	9.6e-16	4.06622
Fxa2Dg203248	756.889	206.192	432.977	2.01e-15	-1.82809
Fxa6Cg102011	332.727	1551.83	828.541	2.25e-15	2.16754
Fxa4Dg102690	1683.49	484.014	1156.86	2.33e-15	-1.75702
Fxa7Dg101357	1039.04	55.0445	323.684	2.49e-15	-4.12731
Fxa6Ag101490	8.62674	544.478	171.841	2.81e-15	5.77393
Fxa2Ag103939	17.2726	625.803	270.674	2.87e-15	5.03103
Fxa5Cg200261	703.499	3720.56	2130.7	4.63e-15	2.34395
Fxa6Ag102599	18.4868	200.367	95.506	4.83e-15	3.31981
Fxa2Cg200846	6.25045	242.082	111.585	4.93e-15	5.12156
Fxa1Bg200790	205.715	4.07081	60.051	5.5e-15	-5.45565
Fxa6Cg101006	109.297	1314.78	621.878	5.54e-15	3.48869
Fxa2Bg201221	346.799	77.5571	173.118	6.08e-15	-2.11421
Fxa4Cg201118	29.1599	453.689	220.724	6.72e-15	3.84198
Fxa3Cg101929	9.44293	183.997	91.5514	6.81e-15	4.18017
Fxa2Cg201159	33.4661	1247.65	495.117	8.57e-15	5.06422
Fxa3Dg201141	46.544	591.634	272.324	9.06e-15	3.57392
Fxa3Bg202738	4.97073	683.234	240.119	1.06e-14	6.91327
Fxa5Dg200731	1397.04	186.088	693.369	1.59e-14	-2.8261
Fxa7Ag201580	1017.95	212.352	399.01	1.66e-14	-2.20431
Fxa6Ag100807	16.6373	449.174	188.134	1.8e-14	4.61808
Fxa3Bg201850	670.313	224.417	390.664	2.23e-14	-1.54531
Fxa2Ag102293	7.14022	282.663	133.396	2.28e-14	5.10052
Fxa3Cg100794	5.39471	254.158	114.225	3.13e-14	5.32723
Fxa7Cg101477	451.609	32.3103	153.691	3.48e-14	-3.70748
Fxa6Bg101324	5.41059	339.457	101.197	4.25e-14	5.74082
Fxa4Ag102967	563.352	132.333	307.103	4.51e-14	-2.03972
Fxa3Ag100552	190.206	23403.6	7992.64	4.91e-14	6.72842
Fxa6Ag104755	6.32629	201.729	91.6563	5.88e-14	4.80702
Fxa3Cg100259	11368.6	1950.44	5409.63	6.12e-14	-2.46991
Fxa4Bg100204	3.99506	1314.04	370.317	6.33e-14	8.13727
Fxa3Dg201368	25.853	1744.36	528.958	1.08e-13	5.89532
Fxa6Cg100200	14.2182	685.798	272.618	1.09e-13	5.42279
Fxa2Dg200460	10.0173	424.272	132.534	1.28e-13	5.24125
Fxa2Dg202357	17.7643	323.292	134.795	1.38e-13	4.06643
Fxa3Cg101550	323.208	84.4858	170.609	1.43e-13	-1.88381
Fxa5Dg201456	1112.14	227.909	446.909	1.44e-13	-2.22317
Fxa2Ag103017	10.2037	997.259	361.472	1.69e-13	6.39059
Fxa6Dg103518	17.5903	249.607	88.831	1.69e-13	3.72897
Fxa5Cg200770	19.6729	2035.8	732.647	1.9e-13	6.48186
Fxa6Dg102278	3.5565	245.685	99.9649	1.93e-13	5.88858
Fxa3Ag100888	12.2568	298.606	143.026	1.95e-13	4.45108
Fxa4Bg100203	8.84132	1854.54	498.933	1.95e-13	7.49367
Fxa6Bg100205	35.0567	1856.96	698.696	2.2e-13	5.55164
Fxa5Bg100753	1569.23	250.123	829.325	2.38e-13	-2.56868
Fxa6Bg103462	842.758	310.562	577.904	2.59e-13	-1.40304
Fxa5Bg101516	923.124	169.197	366.908	2.7e-13	-2.37689
Fxa4Dg102686	307.093	2633.64	1317.73	2.77e-13	3.00763
Fxa7Cg102224	3387.16	482.119	1460.86	2.81e-13	-2.73075
Fxa7Ag203294	22.8718	676.969	256.742	2.82e-13	4.73727
Fxa7Dg100879	24.0919	464.27	212.55	3.64e-13	4.1231
Fxa3Bg203808	389.459	2342.02	1305.56	3.76e-13	2.5126
Fxa1Bg201268	160.651	1910.55	793.315	3.81e-13	3.46408
Fxa7Bg202291	3431.07	910.9	1762.72	4.79e-13	-1.85686
Fxa1Ag100449	153.029	5331.18	2375.83	4.81e-13	4.96456
Fxa7Cg101442	1453.23	656.528	941.376	5.51e-13	-1.12149
Fxa3Cg102655	5.02486	1169.78	421.855	5.93e-13	7.64636
Fxa3Cg101180	177.134	3653.78	1779.98	6.08e-13	4.22983
Fxa1Bg202157	105.609	886.665	382.135	6.44e-13	2.97407
Fxa4Ag100213	6.67896	293.339	127.116	6.44e-13	5.25416
Fxa3Ag101100	60.1045	747.808	393.65	6.95e-13	3.52095
Fxa2Ag100584	787.648	16481.1	7197.04	7.12e-13	4.25107
Fxa5Bg103286	80.1952	1108.09	551.571	7.7e-13	3.66412
Fxa6Ag102095	346.371	98.685	200.743	8.04e-13	-1.76396
Fxa1Ag102270	151.29	1402.08	647.174	8.42e-13	3.11216
Fxa4Bg102051	26.1732	500.564	221.16	9.47e-13	4.10908
Fxa3Dg200405	21.3166	379.409	159.278	9.6e-13	3.99965
Fxa5Cg201764	3139.25	1046.51	1868.23	9.67e-13	-1.54376
Fxa6Ag102205	2.93252	117.769	36.1752	9.77e-13	5.14261
Fxa5Dg200064	102.764	3426.94	1734.27	1.03e-12	4.89473
Fxa7Bg202311	11260.5	2544.72	4498.5	1.07e-12	-2.08178
Fxa6Ag103086	943.481	323.699	628.141	1.13e-12	-1.50379
Fxa4Cg200182	23.6517	1138.92	479.371	1.22e-12	5.41159
Fxa6Cg101777	5.28515	170.759	80.4517	1.23e-12	4.80537
Fxa2Cg202301	15.1021	1937.12	702.988	1.87e-12	6.76794
Fxa3Cg101301	120.365	1282.03	532.814	2.11e-12	3.30988
Fxa1Ag101180	0	712.518	212.994	2.18e-12	12.4993
Fxa4Cg202898	277.367	2217.93	1130.38	2.25e-12	2.90423
Fxa6Ag103243	43.8115	203.93	100.974	2.28e-12	2.16814
Fxa2Bg200599	1094.38	188.223	543.346	2.61e-12	-2.46045
Fxa2Dg202073	14.6263	879.201	269.388	2.66e-12	5.70314
Fxa4Ag103350	984.631	149.602	469.028	2.95e-12	-2.63535
Fxa2Dg200243	117.439	359.816	238.439	2.95e-12	1.57031
Fxa1Dg201222	1458.82	14650.6	7221.11	2.95e-12	3.2255
Fxa2Dg201591	181.406	1214.04	635.509	3.06e-12	2.65896
Fxa4Bg102178	27.3414	1865.61	661.937	3.28e-12	5.87931
Fxa1Ag102739	3294.19	238.436	1075.19	3.54e-12	-3.65398
Fxa5Ag201435	314.452	936.493	643.78	3.64e-12	1.53224
Fxa6Cg102805	6.53764	164.766	93.4761	3.64e-12	4.4792
Fxa7Cg102241	12064.6	2420.27	4740.38	4.26e-12	-2.24295
Fxa4Cg202107	10.3768	238.906	107.403	4.49e-12	4.33816
Fxa6Cg100727	28.4296	282.55	122.857	4.49e-12	3.18274
Fxa1Bg201576	221.992	1781.28	703.453	5.46e-12	2.9097
Fxa4Cg200580	171.008	7339.91	2652.61	6.32e-12	5.23917
Fxa6Bg103574	484.634	103.389	248.56	7.39e-12	-2.16273
Fxa5Ag200618	1795.78	475.615	1059.15	7.91e-12	-1.85618
Fxa3Bg200964	212.599	41.2936	121.002	7.91e-12	-2.28268
Fxa3Cg100494	271.482	32.9523	132.772	7.95e-12	-2.93103
Fxa6Ag105015	135.817	1737.53	923.452	8.73e-12	3.55023
Fxa7Dg101375	3540.06	1046.62	1971.84	9.21e-12	-1.70592
Fxa7Dg102803	1165.24	8081.61	3736.57	9.35e-12	2.69762
Fxa1Ag100837	858.216	27.1409	259.684	9.35e-12	-4.82132
Fxa3Dg202746	294.593	93.6481	179.593	1.02e-11	-1.60161
Fxa6Dg104301	2331.73	859.518	1538.07	1.12e-11	-1.40024
Fxa3Dg200435	125.04	769.537	431.253	1.12e-11	2.53333
Fxa2Cg200368	260.476	56.7205	137.027	1.13e-11	-2.12324
Fxa3Dg201731	20.0469	404.915	176.179	1.26e-11	4.17876
Fxa6Dg101001	7.99142	107.511	51.782	1.34e-11	3.56563
Fxa7Cg102212	454.863	104.873	244.932	1.4e-11	-2.04944
Fxa6Bg104472	1577.48	579.762	1044	1.57e-11	-1.40511
Fxa6Bg102711	1281.6	255.384	575.126	1.65e-11	-2.24943
Fxa2Dg200462	8.12496	417.966	136.267	1.71e-11	5.47552
Fxa5Bg100329	16.1118	758.667	350.544	1.73e-11	5.34203
Fxa4Bg101584	1338.28	269.67	620.76	1.79e-11	-2.22968
Fxa1Ag100956	687.698	57.9024	389.589	1.8e-11	-3.44673
Fxa7Ag201556	5.70329	671.542	275.632	2.29e-11	6.60601
Fxa4Cg202902	2159.75	737.714	1514.69	2.48e-11	-1.5039
Fxa1Dg200374	10.4355	136.879	59.4375	2.49e-11	3.58091
Fxa3Cg100565	95.3858	552.611	293.91	2.69e-11	2.44512
Fxa4Cg201611	2.33674	132.091	87.4015	2.8e-11	5.49986
Fxa7Bg203095	2.998	259.628	136.954	2.81e-11	6.20088
Fxa5Ag200339	13.0166	603.941	316.047	2.87e-11	5.30838
Fxa3Ag101845	13.1343	404.633	181.915	3.11e-11	4.7471
Fxa3Cg101785	35.3633	1536.28	500.708	3.11e-11	5.24595
Fxa3Dg200412	8.64716	577.023	202.696	3.11e-11	5.81115
Fxa6Dg101862	10.3223	472.66	181.993	3.19e-11	5.3096
Fxa4Ag100208	52.8401	2224.49	658.534	3.19e-11	5.20518
Fxa6Ag100835	25.6906	315.415	154.577	3.3e-11	3.47033
Fxa3Dg200659	1197.32	398.518	761.602	3.66e-11	-1.54019
Fxa6Cg100704	53.5724	448.142	218.88	3.66e-11	2.95142
Fxa7Cg101502	5912.16	1602.59	3250.17	3.78e-11	-1.82213
Fxa6Ag102312	169.962	2479.3	872.121	3.97e-11	3.72762
Fxa3Cg100870	50.7274	292.178	177.955	3.98e-11	2.43884
Fxa2Bg202373	155.558	2776.07	974.356	4.73e-11	4.00533
Fxa2Ag102390	25.9353	1440.3	412.546	4.73e-11	5.58104
Fxa3Dg201137	9.63871	388.747	170.453	5.1e-11	5.1064
Fxa2Cg200108	14.1051	195.58	71.3925	5.36e-11	3.65481
Fxa7Dg100050	727.245	242.201	461.772	5.49e-11	-1.53694
Fxa3Cg102459	1124.93	3723.33	2496.11	5.9e-11	1.67356
Fxa5Dg201704	64.2082	1531.33	867.588	6.53e-11	4.40135
Fxa6Bg104583	6.66308	116.221	53.3543	6.68e-11	3.92919
Fxa1Ag100492	19.5267	1069.81	426.149	6.88e-11	5.55624
Fxa7Dg101138	825.46	122.621	348.436	7.05e-11	-2.64784
Fxa1Ag100171	16797.4	1434.21	6089.79	7.42e-11	-3.41498
Fxa1Dg200849	556.673	12719.4	4994.37	7.46e-11	4.34642
Fxa3Dg201523	433.689	74.1329	243.613	7.94e-11	-2.45178
Fxa1Cg100121	155.195	1578.65	529.399	7.95e-11	3.22476
Fxa4CgPR6_7	25.794	2035.21	570.619	8.09e-11	6.06255
Fxa1Cg102266	430.834	123.241	261.936	8.35e-11	-1.74214
Fxa3Dg201139	0.319929	255.839	90.9883	8.38e-11	8.93627
Fxa7Bg202239	21.3325	288.652	119.055	9.1e-11	3.59662
Fxa3Cg101788	2236.16	6727.6	4573.06	9.17e-11	1.54336
Fxa6Bg101234	43.006	244.647	126.448	1.08e-10	2.39876
Fxa6Dg102563	87.881	545.87	304.347	1.14e-10	2.54485
Fxa1Cg100778	939.15	256.19	526.367	1.14e-10	-1.81203
Fxa3Dg200306	44.0098	930.076	429.833	1.16e-10	4.22999
Fxa6Dg100682	20.5241	136.469	90.6195	1.17e-10	2.6139
Fxa5Bg102290	359.101	1660.52	1060.84	1.17e-10	2.13072
Fxa3Bg200436	5.58466	138.236	63.8985	1.17e-10	4.36155
Fxa3Bg203432	429.577	5707.29	2300.37	1.31e-10	3.59218
Fxa3Bg202253	2328.84	317.516	819.113	1.36e-10	-2.76803
Fxa2Bg203488	404.403	122.405	248.001	1.39e-10	-1.66762
Fxa7Bg200995	1.42558	156.088	58.5918	1.41e-10	6.46034
Fxa5Cg201640	8.01864	479.947	239.632	1.41e-10	5.62886
Fxa5Ag200076	305.803	3806.64	2492.62	1.42e-10	3.50157
Fxa5Cg200064	466.031	5969.71	3754.22	1.46e-10	3.54105
Fxa3Bg200261	17834	4678.44	10074.6	1.79e-10	-1.86336
Fxa1Bg201160	273.43	788.627	582.169	1.82e-10	1.48105
Fxa2Ag101744	2500	338.329	869.525	1.85e-10	-2.77416
Fxa6Cg100267	656.717	4611.94	2097.8	1.85e-10	2.69823
Fxa3Ag103509	0.36855	441.624	119.462	1.85e-10	9.6736
Fxa2Ag100242	5.62647	231.092	88.9942	1.91e-10	5.15181
Fxa5Dg201385	434.161	6320.63	3132.92	2.1e-10	3.72085
Fxa1Ag102979	1150.1	405.642	706.329	2.33e-10	-1.45752
Fxa2Bg201605	9.00339	116.292	56.2521	2.35e-10	3.5196
Fxa3Ag102496	2088.81	270.953	725.191	2.35e-10	-2.83518
Fxa6Dg104351	222.903	1868.66	1043.81	2.46e-10	2.9503
Fxa1Dg200721	2119.78	312.591	905.854	2.47e-10	-2.65189
Fxa2Bg200479	6.9762	164.543	76.8815	2.48e-10	4.40258
Fxa1Cg101340	248.075	2672.14	1338.17	2.51e-10	3.29758
Fxa2Cg201106	39.7876	933.58	425.034	2.53e-10	4.37006
Fxa5Bg100077	12.1981	470.247	258.601	2.65e-10	5.02717
Fxa6Bg102414	6.51041	177.886	73.8778	2.68e-10	4.59268
Fxa5Dg200823	2493.85	376.675	941.87	2.7e-10	-2.62317
Fxa1Dg200712	410.281	22.2524	130.316	2.72e-10	-4.05234
Fxa7Cg103062	72.2216	338.376	195.663	2.75e-10	2.15608
Fxa4Dg100777	1245.93	377.685	730.532	2.88e-10	-1.66351
Fxa2Ag103460	393.29	1644.03	869.876	2.91e-10	1.99098
Fxa2Dg202937	0	316.725	87.9216	3.48e-10	11.3188
Fxa6Cg101422	124.415	561.516	292.225	3.5e-10	2.09506
Fxa4Cg201600	864.724	11501.1	5820.42	3.51e-10	3.58665
Fxa2Cg200397	53.6706	536.421	226.009	3.71e-10	3.18759
Fxa6Dg101242	1.00841	176.392	54.2102	3.71e-10	7.0393
Fxa2Ag102253	4.58078	101.233	44.2575	3.88e-10	4.23715
Fxa1Cg102519	32.9277	563.483	242.679	4.09e-10	3.92852
Fxa1Cg100920	292.771	6260.26	2363.24	4.09e-10	4.24161
Fxa4Cg202747	30.7015	310.668	170.56	4.17e-10	3.20059
Fxa1Cg102428	1.13839	111.389	38.1962	4.22e-10	6.37069
Fxa5Ag202282	101.488	647.718	314.849	4.44e-10	2.56479
Fxa4Bg102426	9.11846	134.165	43.3487	4.53e-10	3.71862
Fxa6Ag101182	288.358	1912.03	968.048	4.57e-10	2.62238
Fxa7Bg202539	3825.11	1133.7	2035.71	4.8e-10	-1.69357
Fxa4Cg202423	11.4922	578.513	239.006	4.85e-10	5.44006
Fxa1Ag100813	609.954	207.113	388.174	4.91e-10	-1.50626
Fxa7Cg101097	1.00841	335.979	104.911	5.06e-10	7.93122
Fxa1Ag100971	105.023	1120.1	410.585	5.06e-10	3.27931
Fxa2Ag103485	282.949	37.6281	140.537	5.06e-10	-2.7927
Fxa3Bg201798	1616.01	398.614	674.223	5.07e-10	-1.94709
Fxa1Ag101818	70.4524	261.583	152.195	5.21e-10	1.82616
Fxa6Dg103293	27.2448	180.947	92.4707	5.39e-10	2.6175
Fxa4Bg102651	15.0059	157.911	72.1164	5.49e-10	3.26674
Fxa5Dg202532	4.88937	102.185	45.5931	5.5e-10	4.20689
Fxa2Bg203554	51.4171	623.729	276.94	6.04e-10	3.44479
Fxa6Ag102040	34.5659	317.301	171.912	6.22e-10	3.05495
Fxa7Cg102169	13.6947	217.19	93.7946	6.22e-10	3.80246
Fxa1Bg202360	264.727	59.1758	188.307	6.27e-10	-2.08151
Fxa7Cg101708	6615.99	2608.62	4637.99	6.33e-10	-1.30052
Fxa7Bg202277	363.912	82.1071	202.129	6.37e-10	-2.06244
Fxa5Ag201794	1030.7	148.074	443.666	6.41e-10	-2.68691
Fxa3Cg100418	22.4333	263.774	128.462	6.48e-10	3.4017
Fxa6Dg104212	1029.72	271.8	638.191	6.75e-10	-1.84739
Fxa4Ag101943	54.7101	2155.03	838.884	7.2e-10	5.07022
Fxa5Cg201396	873.182	119.511	325.86	7.44e-10	-2.75169
Fxa4Bg103113	1384.31	349.038	915.209	7.44e-10	-1.91129
Fxa2Dg202543	38.7937	439.264	204.153	8.07e-10	3.35411
Fxa2Cg200604	544.887	2358.86	1292.83	8.07e-10	2.03694
Fxa3Ag104261	20.0311	296.265	137.309	8.07e-10	3.72022
Fxa7Dg100869	19.3957	233.945	107.098	8.56e-10	3.44266
Fxa3Dg203491	22.3629	432.117	170.246	9.47e-10	4.09382
Fxa6Dg100189	5.925	192.034	68.1976	9.48e-10	4.767
Fxa6Cg101025	235.033	1615.58	800.334	9.57e-10	2.66867
Fxa5Ag201307	301.247	2582.69	1302.85	9.71e-10	2.97261
Fxa1Ag100749	4.96522	281.625	148.294	1.01e-09	5.54561
Fxa3Ag103277	34.7727	381.206	158.167	1.04e-09	3.30067
Fxa6Ag100928	6.02225	232.622	105.065	1.09e-09	5.01539
Fxa3Bg202184	3.21971	195.714	63.5821	1.1e-09	5.64091
Fxa1Bg201223	305.142	2232.85	1197.12	1.12e-09	2.7536
Fxa3Cg100426	3.02522	198.516	69.4591	1.17e-09	5.70331
Fxa2Bg200496	172.538	2347.86	1123	1.26e-09	3.60755
Fxa6Cg104225	38.1613	478.727	210.07	1.26e-09	3.48879
Fxa1Bg202130	725.762	241.131	455.02	1.4e-09	-1.52897
Fxa5Cg202153	369.153	2117.43	1293.83	1.42e-09	2.41411
Fxa1Cg100789	289.022	7.05629	82.7846	1.45e-09	-5.12196
Fxa3Dg203293	870.194	254.731	485.597	1.45e-09	-1.70454
Fxa5Dg201993	595.5	180.158	340.688	1.5e-09	-1.65941
Fxa5Ag202426	455.214	166.891	265.173	1.54e-09	-1.40035
Fxa5Ag201563	2096.3	459.762	839.057	1.56e-09	-2.10188
Fxa3Ag100490	385.169	138.343	229.236	1.58e-09	-1.41895
Fxa3Ag101208	168.365	1071.19	500.038	1.6e-09	2.56167
Fxa3Ag100547	1235.28	153.498	579.536	1.6e-09	-2.88229
Fxa1Dg200439	15.4457	714.032	308.219	1.67e-09	5.28306
Fxa2Cg200101	16.5254	301.034	166.201	1.68e-09	3.98366
Fxa2Bg203463	591.985	157.682	320.055	1.69e-09	-1.83336
Fxa2Dg200492	132.477	10.3502	44.1482	1.7e-09	-3.52326
Fxa7Cg100602	17.0771	186.056	77.977	1.8e-09	3.27823
Fxa2Cg200579	321.763	51.0987	168.743	1.8e-09	-2.54826
Fxa2Ag102392	179.674	1052.13	555.057	1.93e-09	2.44049
Fxa1Cg101146	406.673	4917.99	2630.96	2.03e-09	3.44456
Fxa3Ag102477	9336.14	1341.99	4479.97	2.19e-09	-2.67665
Fxa5Dg203080	126.334	1219.02	600.529	2.2e-09	3.12707
Fxa7Ag202398	15105.8	3279.07	6041.73	2.2e-09	-2.11417
Fxa1Cg101439	292.119	740.481	498.381	2.27e-09	1.29778
Fxa6Bg102757	8.12042	219.793	105.896	2.39e-09	4.52136
Fxa1Cg100231	46.0078	1196.25	504.309	2.42e-09	4.48193
Fxa7Ag201194	6.30458	650.665	186.5	2.63e-09	6.40187
Fxa5Bg100891	16.2214	214.607	82.4455	2.65e-09	3.53574
Fxa3Cg102870	31.4205	397.91	251.848	2.72e-09	3.50201
Fxa1Dg201823	2.33674	205.905	97.2466	2.73e-09	6.08685
Fxa1Cg100797	1134.49	188.242	469.021	3.07e-09	-2.47979
Fxa2Ag103932	5.58466	329.207	116.568	3.13e-09	5.56352
Fxa2Ag102919	14.0782	224.441	95.8619	3.31e-09	3.79666
Fxa6Dg103222	40.7742	220.47	114.779	3.33e-09	2.32006
Fxa7Dg102861	254.348	943.257	553.51	3.38e-09	1.81605
Fxa1Bg201867	477.419	154.056	302.77	3.51e-09	-1.56823
Fxa4Cg201900	0.7371	237.787	95.8338	3.67e-09	7.92792
Fxa6Bg100124	200.671	53.3604	128.841	3.91e-09	-1.83739
Fxa2Bg201881	76.5846	1195.69	505.058	4.01e-09	3.78425
Fxa7Ag201756	612.393	40.8971	227.558	4.05e-09	-3.72329
Fxa4Ag102748	0	115.826	41.6831	4.07e-09	9.70274
Fxa5Cg200931	38.2304	1183.87	439.149	4.08e-09	4.72716
Fxa7Cg103018	0.7371	280.774	102.945	4.25e-09	8.15522
Fxa3Cg103647	21.1905	234.873	104.409	4.34e-09	3.33448
Fxa2Ag102359	66.7063	18645	7069.75	4.51e-09	7.7384
Fxa2Dg203320	477.074	135.875	299.547	4.62e-09	-1.73545
Fxa2Dg201980	19.0061	556.345	271.318	4.85e-09	4.6305
Fxa3Ag100258	16888.7	3982.26	8777.33	4.93e-09	-1.99763
Fxa7Bg203115	298.727	1109.47	652.586	5.02e-09	1.81826
Fxa1Dg200720	2.80254	492.556	248.642	5.04e-09	7.06305
Fxa4Cg202313	1669.56	536.198	963.864	5.08e-09	-1.57777
Fxa4Ag100728	10.1473	229.404	101.219	5.12e-09	4.29255
Fxa3Dg201078	28.0918	285.706	123.058	5.14e-09	3.18183
Fxa5Cg203009	1096.12	181.459	405.093	5.35e-09	-2.48043
Fxa3Ag102742	17.0752	554.864	207.552	5.57e-09	4.77894
Fxa1Bg202016	189.898	8.07851	119.414	5.57e-09	-4.29395
Fxa3Ag103447	1293.02	326.191	546.327	5.94e-09	-1.90628
Fxa2Ag101435	510.759	205.096	379.94	5.97e-09	-1.26937
Fxa6Ag104952	2708.38	955.885	1724.38	5.97e-09	-1.44692
Fxa6Dg103647	83.59	446.978	237.592	6.17e-09	2.31817
Fxa6Bg101859	13.9164	169.232	89.6718	6.23e-09	3.41162
Fxa1Bg200770	558.123	146.501	325.214	6.48e-09	-1.84284
Fxa4Ag102703	330.99	47.4788	142.596	6.52e-09	-2.67689
Fxa3Dg201999	8969.73	1458.54	4590.41	6.57e-09	-2.50359
Fxa1Cg100719	11.6724	426.122	250.656	6.76e-09	4.92684
Fxa5Cg200524	0	119.07	36.9289	7.06e-09	9.76455
Fxa4Ag102722	40.631	227.638	107.711	7.21e-09	2.36593
Fxa1Bg201079	1.27972	185.033	51.8934	7.23e-09	6.70667
Fxa6Cg102963	51.3157	464.465	264.78	7.23e-09	3.03707
Fxa3Bg200161	7687.83	1816.16	3851.61	7.27e-09	-1.99445
Fxa4Cg201713	2018.47	675.384	1128.6	7.28e-09	-1.51881
Fxa2Ag100705	1934.56	524.935	1058.8	7.29e-09	-1.80215
Fxa6Dg103272	105.199	3102.91	1252.11	7.31e-09	4.65255
Fxa3Dg201059	693.118	97.5103	319.337	7.36e-09	-2.69844
Fxa7Dg100070	1284.24	419.942	661.845	7.45e-09	-1.55228
Fxa6Ag103707	114.644	1431.96	760.55	7.59e-09	3.47506
Fxa1Dg201162	58.9995	893.949	519.434	7.94e-09	3.73313
Fxa2Dg202658	321.84	79.2745	167.799	8.09e-09	-1.92507
Fxa2Ag103308	0.319929	171.906	66.8236	8.42e-09	8.30097
Fxa6Bg100801	359.556	100.882	219.089	8.42e-09	-1.75393
Fxa2Cg201673	208.588	6.56879	58.5141	8.5e-09	-4.71568
Fxa7Dg101336	5.36197	355.207	139.778	8.51e-09	5.71603
Fxa1Cg100046	683.388	69.3073	323.837	8.53e-09	-3.13653
Fxa6Bg104492	2.8839	168.304	54.1114	8.59e-09	5.56445
Fxa1Ag100448	123.441	1153.29	678.062	8.59e-09	3.07537
Fxa2Dg201908	36.8777	217.401	141.339	8.84e-09	2.44386
Fxa3Bg203132	288.54	876.531	494.78	8.95e-09	1.54251
Fxa6Dg101349	278.283	36.8145	125.588	9.22e-09	-2.78235
Fxa3Bg202233	10215.7	1358.38	4775.41	9.35e-09	-2.76871
Fxa5Ag200885	38.4109	2046.61	829.878	9.42e-09	5.45854
Fxa6Dg100939	14.3404	334.098	156.507	9.48e-09	4.29591
Fxa5Ag202186	10.6799	612.089	217.195	9.52e-09	5.54491
Fxa5Dg200949	23.9934	412.12	173.478	9.8e-09	3.90729
Fxa1Ag100555	146.495	18.054	67.0607	9.99e-09	-2.88646
Fxa2Bg201009	457.978	143.628	296.001	1.04e-08	-1.6047
Fxa5Bg103488	68.5513	4426.66	1624.57	1.05e-08	5.72256
Fxa2Ag103073	476.624	185.464	317.005	1.05e-08	-1.30969
Fxa1Ag100845	2214.37	486.362	999.586	1.06e-08	-2.0892
Fxa5Cg202633	1036.22	151.249	342.745	1.13e-08	-2.6513
Fxa2Bg203164	594.125	173.443	361.455	1.13e-08	-1.69771
Fxa3Bg203708	134.943	9291.65	2545.36	1.17e-08	5.82115
Fxa1Cg102272	20.8959	1379.91	436.821	1.19e-08	5.74112
Fxa5Ag201982	4620.73	267.086	2334.32	1.21e-08	-3.90557
Fxa7Dg102078	370.589	101.815	218.486	1.21e-08	-1.78302
Fxa7Ag202365	601.477	143.326	330.594	1.22e-08	-1.98101
Fxa6Bg103007	591.466	198.027	328.101	1.25e-08	-1.51264
Fxa3Ag103849	2.01682	439.056	168.353	1.28e-08	7.31484
Fxa3Ag104087	245.434	3120	1105.77	1.32e-08	3.49553
Fxa7Ag202881	165.275	6.27645	55.3271	1.43e-08	-4.50653
Fxa3Dg200759	37.0599	403.797	220.637	1.43e-08	3.27133
Fxa2Ag101780	48.0824	301.831	142.847	1.44e-08	2.53726
Fxa4Bg102072	793.278	295.541	490.853	1.49e-08	-1.37188
Fxa6Dg102903	60.9469	366.579	193.027	1.51e-08	2.45724
Fxa3Cg103231	296.23	51.8756	137.343	1.52e-08	-2.39745
Fxa3Cg101590	257.819	57.0523	136.999	1.59e-08	-2.07741
Fxa3Dg203592	603.388	213.774	387.329	1.63e-08	-1.44096
Fxa5Cg200685	1365.79	377.754	865.915	1.64e-08	-1.77296
Fxa6Ag104406	7.89417	97.1975	39.8728	1.66e-08	3.39749
Fxa2Ag100652	3.23657	273.01	82.9696	1.69e-08	6.06689
Fxa1Dg200052	11.2222	190.402	69.6234	1.7e-08	3.89176
Fxa7Ag201660	6.83617	656.767	223.979	1.71e-08	6.22933
Fxa5Dg200813	784.541	281.108	507.884	1.71e-08	-1.4196
Fxa4Cg202920	221.4	29.6155	123.014	1.78e-08	-2.78404
Fxa4Bg103293	199.248	53.7673	111.461	1.81e-08	-1.80185
Fxa3Ag104186	2.6181	190.207	61.673	1.81e-08	5.97254
Fxa6Ag103489	174.771	37.4181	89.2616	1.82e-08	-2.11685
Fxa6Bg103454	2.17954	145.746	64.0312	1.82e-08	5.74299
Fxa5Ag200831	567.453	118.158	295.678	1.84e-08	-2.15679
Fxa5Cg202193	1.13839	142.734	50.4783	1.87e-08	6.64007
Fxa5Bg100769	3243.55	771.007	1647.57	1.9e-08	-1.979
Fxa1Ag102599	393.316	51.1076	167.009	1.9e-08	-2.80305
Fxa5Cg202027	17.9283	502.348	181.848	1.93e-08	4.56392
Fxa4Cg202603	136.262	13.8761	57.6178	1.97e-08	-3.12817
Fxa3Ag102108	877.145	270.333	491.758	1.98e-08	-1.62971
Fxa3Ag102397	4.4722	136.264	53.0489	1.99e-08	4.68509
Fxa1Dg201961	84.2113	7.18552	60.4985	2.06e-08	-3.35629
Fxa6Dg102741	83.5034	973.814	438.015	2.08e-08	3.37042
Fxa4Cg200270	405.918	2522.43	1384.88	2.17e-08	2.5117
Fxa7Ag201520	189.482	41.6677	104.216	2.19e-08	-2.0976
Fxa5Bg101556	677.153	3586.5	1867.42	2.19e-08	2.29026
Fxa7Cg101335	238.042	2026.78	1064.9	2.2e-08	2.95551
Fxa6Dg102828	627.306	3918.57	1873.93	2.21e-08	2.51983
Fxa3Dg202866	32.435	446.958	195.821	2.23e-08	3.59053
Fxa3Cg101782	2223.22	794.448	1079.86	2.27e-08	-1.42533
Fxa6Ag100299	471.893	3758.59	1739.16	2.37e-08	2.85185
Fxa5Ag201061	54.009	1246.73	472.253	2.41e-08	4.30285
Fxa5Dg200305	0	104.125	45.3194	2.42e-08	9.52256
Fxa6Cg103618	10.2682	96.5145	39.0748	2.43e-08	3.04872
Fxa5Dg201414	1247.51	413.707	880.047	2.47e-08	-1.5247
Fxa6Bg103236	15.8405	345.111	176.093	2.49e-08	4.20738
Fxa1Dg201686	54.444	208.566	128.99	2.56e-08	1.84603
Fxa4Ag103066	100.471	819.879	390.943	2.61e-08	2.88303
Fxa3Bg200810	2.11957	104.37	44.0658	2.62e-08	5.44552
Fxa3Ag100527	556.297	39.2975	234.199	2.69e-08	-3.63294
Fxa7Bg200368	768.665	6145.21	3442.6	2.69e-08	2.85481
Fxa5Ag201605	0	104.945	30.2289	2.77e-08	9.54921
Fxa7Cg101905	1.37696	91.9774	35.4368	2.78e-08	5.67708
Fxa4Cg200114	8.70712	300.412	111.909	2.79e-08	4.8142
Fxa2Cg201714	0.449911	173.659	53.31	2.79e-08	8.25872
Fxa6Ag103904	11.6815	214.436	78.8835	2.8e-08	3.98129
Fxa3Bg201822	239.969	19.4244	102.786	2.91e-08	-3.42377
Fxa3Ag103123	352.889	88.7422	228.505	2.93e-08	-1.89627
Fxa1Ag100756	57.2747	1416.79	486.322	2.95e-08	4.38996
Fxa2Ag103600	0	128.064	50.6932	2.99e-08	9.76761
Fxa3Cg102307	10.4851	135.437	54.8017	3e-08	3.50927
Fxa6Cg103590	342.56	51.2795	156.197	3e-08	-2.6053
Fxa2Bg202312	683.476	132.277	340.007	3.08e-08	-2.25834
Fxa2Bg200389	481.853	2336.93	1415.67	3.15e-08	2.1721
Fxa7Ag203289	2.54809	291.413	120.011	3.28e-08	6.4634
Fxa6Bg101146	20.28	324.571	174.099	3.45e-08	3.78703
Fxa6Bg101915	3.38243	252.758	76.8516	3.47e-08	5.9023
Fxa6Cg101819	1.05703	150.05	49.3893	3.47e-08	6.7235
Fxa2Dg203224	59.4578	596.278	251.983	3.53e-08	3.1552
Fxa1Dg200251	541.919	155.965	305.457	3.62e-08	-1.71769
Fxa3Dg201728	2077.01	11410.6	6348.14	3.64e-08	2.34265
Fxa3Cg102179	6.39728	130.601	64.3033	3.64e-08	4.13628
Fxa6Ag100535	130.202	13.7498	54.3264	3.64e-08	-3.07913
Fxa2Cg202962	108.5	987.481	556.555	3.66e-08	3.0278
Fxa3Bg200508	187.583	30.0239	94.4182	3.67e-08	-2.52116
Fxa4Cg202378	303.841	44.7414	138.639	3.69e-08	-2.63394
Fxa1Cg100320	300.077	637.427	432.193	3.7e-08	1.05067
Fxa3Bg202185	1.79964	95.759	33.5349	3.73e-08	5.62092
Fxa1Cg100728	330.87	4739.5	2107.07	3.79e-08	3.64704
Fxa3Ag101435	298.285	949.23	593.054	3.81e-08	1.59407
Fxa2Dg201245	948.616	14017.7	6328.77	3.88e-08	3.69122
Fxa1Cg101079	30.3051	155.661	92.0238	3.98e-08	2.22521
Fxa4Dg100267	214.458	1084.95	603.169	3.99e-08	2.22606
Fxa6Bg103861	175.325	693.093	398.714	4.09e-08	1.8943
Fxa1Ag100875	13.3093	211.405	68.4768	4.1e-08	3.76839
Fxa6Bg102368	6.85303	93.9452	44.9253	4.32e-08	3.52634
Fxa6Dg101929	139.019	11.4573	58.8706	4.51e-08	-3.44402
Fxa1Dg202732	1108.52	454.154	728.619	4.53e-08	-1.23785
Fxa2Ag103020	4.80898	354.466	134.983	4.69e-08	5.87685
Fxa6Bg102737	329.437	18.5666	157.312	4.69e-08	-3.92782
Fxa4Bg102623	0.319929	264.514	282.271	4.77e-08	8.82654
Fxa6Ag102983	129.419	8.18559	69.0102	4.87e-08	-3.76331
Fxa6Cg102531	64.1897	703.032	326.465	4.87e-08	3.27378
Fxa7Ag203225	2078.91	14457.8	5998.06	4.89e-08	2.65943
Fxa4Cg202401	20.1827	199.057	91.6592	4.91e-08	3.11805
Fxa3Bg200534	29.8594	300.752	114.352	5e-08	3.15583
Fxa4Ag100836	301.326	2186.57	1147.06	5e-08	2.71896
Fxa7Cg102670	1053.75	37.5018	280.657	5e-08	-4.54648
Fxa4Ag103267	582.267	1723.08	1105.32	5.11e-08	1.50007
Fxa4Ag103222	510.976	106.31	285.754	5.11e-08	-2.15288
Fxa3Dg200227	336.422	3207.36	1690.22	5.12e-08	3.08916
Fxa2Ag101645	165.223	1279.48	564.33	5.26e-08	2.80583
Fxa5Dg201020	532.261	212.633	354.828	5.34e-08	-1.26892
Fxa1Cg100854	3.23657	71.0953	32.7695	5.34e-08	4.19149
Fxa3Ag102179	50.0418	5.77129	25.5221	5.38e-08	-2.97675
Fxa7Ag202907	322.241	95.5896	193.653	5.56e-08	-1.66992
Fxa6Dg103252	593.231	226.311	380.468	5.56e-08	-1.33186
Fxa6Ag101493	13.3411	167.39	96.4522	5.57e-08	3.43834
Fxa7Cg102808	653.06	230.993	489.7	5.66e-08	-1.43649
Fxa5Bg100608	1215.53	353.9	703.203	5.78e-08	-1.70087
Fxa6Bg103508	128.417	443.845	247.081	5.8e-08	1.70822
Fxa3Ag102694	2.60805	97.0061	38.0788	5.88e-08	4.83554
Fxa6Bg100446	766.373	266.366	485.255	6.14e-08	-1.46139
Fxa7Cg101245	875.593	229.372	521.401	6.21e-08	-1.83855
Fxa7Bg201565	0	116.405	37.5949	6.21e-08	9.64319
Fxa5Cg200395	20.6352	627.185	253.541	6.26e-08	4.65685
Fxa3Dg200577	177.458	48.6699	112.526	6.29e-08	-1.78048
Fxa6Cg100423	0	92.2317	27.9458	6.32e-08	9.31779
Fxa6Bg102925	44.5204	292.553	151.177	6.45e-08	2.57819
Fxa1Ag101894	25.7765	1388.21	400.493	6.65e-08	5.4527
Fxa5Dg200506	7.08025	58.6748	27.5694	6.74e-08	2.8455
Fxa2Ag103374	632.372	164.088	356.257	6.99e-08	-1.85366
Fxa7Bg201071	17.4402	187.48	110.216	7.08e-08	3.22502
Fxa7Bg201756	1014.25	61.4976	364.755	7.08e-08	-3.81853
Fxa7Ag202008	2.9766	310.797	137.705	7.13e-08	6.27751
Fxa7Cg101342	64.9618	644.916	289.532	7.13e-08	3.13857
Fxa2Bg203265	504.314	89.361	266.425	7.14e-08	-2.37282
Fxa2Ag102474	1188.68	165.133	499.072	7.47e-08	-2.70276
Fxa4Dg102261	179.5	473.565	322.471	7.55e-08	1.33959
Fxa6Cg100442	328.483	103.393	201.104	7.55e-08	-1.59801
Fxa5Bg100574	557.98	1760.55	1147.69	7.55e-08	1.58334
Fxa3Cg102924	30.7401	359.461	155.248	7.57e-08	3.35359
Fxa1Ag100188	0	68.3063	22.9906	7.61e-08	8.86182
Fxa2Cg202604	4.19635	147.202	58.0015	7.63e-08	4.82187
Fxa4Bg102840	867.25	183.442	468.098	7.63e-08	-2.13147
Fxa5Bg100474	1940.94	510.528	1261.88	7.72e-08	-1.83401
Fxa5Cg202370	9.83417	104.998	59.8982	7.94e-08	3.20508
Fxa2Ag102371	2752.71	1112.38	1847.65	8.01e-08	-1.25444
Fxa3Dg202017	1399.45	224.874	523.243	8.09e-08	-2.50333
Fxa3Bg203516	2376.01	743.209	1467.89	8.17e-08	-1.6013
Fxa6Cg101350	2223.23	798.638	1364.67	8.22e-08	-1.41486
Fxa6Bg102284	95544.8	34306.4	56374.8	8.42e-08	-1.41431
Fxa7Bg200079	1572.31	669.617	1030.5	8.46e-08	-1.18335
Fxa2Bg200115	1.5883	67.1246	28.2596	8.52e-08	5.17959
Fxa1Dg202743	477.329	197.858	290.179	8.65e-08	-1.22394
Fxa1Ag100048	196.755	1081.82	573.157	8.71e-08	2.33591
Fxa5Bg101569	0	126.608	34.4005	8.74e-08	9.80162
Fxa6Cg101231	2582.6	15621.2	7156.74	9.02e-08	2.46473
Fxa5Dg201505	0	52.6702	14.0985	9.14e-08	8.62719
Fxa4Cg202749	616.061	199.916	435.134	9.24e-08	-1.55259
Fxa3Cg103788	23.7944	173.65	87.5539	9.33e-08	2.70898
Fxa6Dg102445	1827.52	509.212	1036.27	9.36e-08	-1.75707
Fxa6Cg101088	500.246	72.0194	222.489	9.36e-08	-2.64721
Fxa3Bg202880	65.5903	631.143	268.878	9.39e-08	3.10902
Fxa6Ag102900	4.08225	72.5442	21.5693	9.53e-08	3.864
Fxa3Cg101675	0.36855	205.315	57.5009	9.53e-08	8.47112
Fxa2Ag103850	686.556	5232.05	2218.04	9.53e-08	2.78068
Fxa3Bg202826	19.6048	232.611	96.9294	9.61e-08	3.36322
Fxa4Ag103299	201.128	833.954	502.582	9.63e-08	1.95093
Fxa5Dg201489	1466.73	7110.31	3727.19	9.98e-08	2.1608
Fxa6Dg102565	856.96	180.346	383.397	1e-07	-2.13697
Fxa3Bg201191	10.4899	104.451	52.817	1.01e-07	3.10842
Fxa6Ag100423	22.5373	353.957	160.613	1.04e-07	3.74748
Fxa3Bg203702	9.17843	283.626	94.3051	1.06e-07	4.66039
Fxa2Dg200863	265.077	93.7701	156.266	1.07e-07	-1.43027
Fxa2Cg203064	347.602	54.7864	175.804	1.08e-07	-2.52228
Fxa3Ag104088	107.845	1328.26	576.039	1.08e-07	3.4272
Fxa1Ag101640	585.765	89.8025	271.014	1.08e-07	-2.56798
Fxa5Ag202372	672.221	2612.79	1635.09	1.08e-07	1.86916
Fxa5Ag200542	152.751	39.3405	84.4622	1.12e-07	-1.85372
Fxa6Bg104318	105.177	885.105	437.191	1.13e-07	2.91001
Fxa6Ag100680	6723.18	3091.42	4559.65	1.15e-07	-1.07922
Fxa3Bg201280	219.378	1602.65	887.95	1.16e-07	2.71847
Fxa6Ag102826	1815.08	612.593	1152.73	1.19e-07	-1.49736
Fxa4Ag103058	118.522	23.5653	71.9915	1.19e-07	-2.22178
Fxa2Dg201179	209.84	26.1896	83.2733	1.19e-07	-2.8405
Fxa6Dg103223	108.297	4192.39	1597.28	1.21e-07	4.9805
Fxa3Dg200239	5410.12	1241.46	2684.91	1.22e-07	-2.01447
Fxa4Dg102178	11.2043	111.573	45.3584	1.22e-07	3.14022
Fxa3Bg200329	18.0029	82.7311	41.8143	1.22e-07	2.10369
Fxa5Cg201370	237.726	44.7638	148.738	1.34e-07	-2.27632
Fxa4Dg101524	1180.63	29.6043	481.666	1.34e-07	-5.00459
Fxa4Ag102883	925.125	2506.26	1577.06	1.34e-07	1.37912
Fxa2Ag103357	17.4282	734.857	281.708	1.35e-07	5.10306
Fxa5Dg203105	826.955	163.603	328.863	1.35e-07	-2.21785
Fxa1Bg202437	49.7601	187.827	105.91	1.36e-07	1.82253
Fxa3Bg200449	9.29123	247.959	85.5711	1.38e-07	4.49964
Fxa3Ag103177	206.692	1724.68	711.983	1.41e-07	2.9001
Fxa3Ag100464	106.265	489.027	262.122	1.42e-07	2.08949
Fxa6Ag100408	0	97.6112	36.4427	1.44e-07	9.33001
Fxa2Dg202163	138.144	31.4205	68.0261	1.44e-07	-2.04241
Fxa6Bg103912	495.394	74.5427	404.483	1.48e-07	-2.58222
Fxa2Cg202988	13.5693	137.128	66.3383	1.49e-07	3.13367
Fxa4CgPR6_9	12.5754	533.574	164.595	1.49e-07	5.11359
Fxa1Dg200752	41.5094	737.506	222.215	1.5e-07	3.92784
Fxa1Bg200045	535.191	116.152	318.458	1.5e-07	-2.08762
Fxa5Bg100853	1095.83	280.451	566.193	1.55e-07	-1.86887
Fxa1Cg102960	16.3977	126.565	70.2974	1.56e-07	2.7914
Fxa3Bg202646	123.154	1378.81	557.521	1.56e-07	3.29446
Fxa5Bg101228	1092.81	426.084	758.142	1.61e-07	-1.30103
Fxa6Cg102338	0	79.668	31.5975	1.63e-07	9.02398
Fxa5Dg201978	201.508	1301.72	629.02	1.65e-07	2.54763
Fxa6Bg100129	204.649	895.4	501.119	1.68e-07	2.02142
Fxa3Ag102209	55.5195	279.411	140.851	1.7e-07	2.21051
Fxa2Dg200581	55.9837	1002.7	472.684	1.74e-07	3.92507
Fxa4Bg102405	30.8208	382.514	177.347	1.78e-07	3.41758
Fxa7Bg203059	193.138	1390.9	553.592	1.78e-07	2.69858
Fxa7Ag201101	2.75392	217.053	100.312	1.8e-07	5.88749
Fxa5Dg201391	17.3527	497.449	212.382	1.81e-07	4.56785
Fxa1Ag102152	11.0312	217.944	97.2839	1.81e-07	4.06826
Fxa2Bg201297	643.242	147.92	383.872	1.81e-07	-2.0077
Fxa6Ag103058	7456.55	1810.97	3882.37	1.82e-07	-1.93839
Fxa2Bg202153	337.586	68.8914	218.515	1.86e-07	-2.17319
Fxa3Bg200698	437.14	46.5315	185.496	1.93e-07	-3.05238
Fxa3Ag101609	1.37696	170.132	49.4088	1.93e-07	6.49029
Fxa6Bg100206	8.8585	106.383	47.846	1.93e-07	3.36305
Fxa3Ag102019	18.0369	247.549	132.445	1.95e-07	3.55525
Fxa7Dg102034	30.4464	187.553	85.851	2e-07	2.46276
Fxa7Cg102458	5167	1528.08	2808.75	2e-07	-1.67107
Fxa2Dg200580	40.6676	600.985	281.021	2.01e-07	3.6618
Fxa1Cg101271	121.177	1664.9	957.187	2.07e-07	3.56684
Fxa1Bg201535	2.4395	99.2247	34.432	2.15e-07	5.10812
Fxa6Bg104556	373.786	1083.44	680.483	2.17e-07	1.46657
Fxa3Bg202469	11194.6	1760.04	5149.53	2.17e-07	-2.51728
Fxa2Cg201664	20.2463	329.616	154.387	2.18e-07	3.78586
Fxa2Ag103305	496.194	1599.41	914.67	2.2e-07	1.60839
Fxa1Bg200797	1183.43	254.091	541.361	2.2e-07	-2.10029
Fxa5Dg201386	0.639858	78.5722	32.2883	2.2e-07	6.36653
Fxa3Dg200915	43.9884	211.475	137.176	2.2e-07	2.13228
Fxa7Ag200628	367.479	1889.48	1093.78	2.22e-07	2.23751
Fxa2Ag100550	409.018	2820.79	1513.67	2.24e-07	2.63617
Fxa6Dg104411	32.965	226.137	118.513	2.26e-07	2.62169
Fxa6Ag103580	2387.12	11485	6022.34	2.26e-07	2.14473
Fxa6Ag102400	40.4313	1323.06	539.973	2.3e-07	4.73513
Fxa7Ag201342	1332.52	308.048	777.801	2.34e-07	-2.00231
Fxa3Dg201833	234.059	687.306	465.098	2.35e-07	1.48316
Fxa6Cg101079	22.985	316.069	125.392	2.37e-07	3.5682
Fxa7Dg102482	279.63	8.1532	74.6532	2.38e-07	-4.80723
Fxa1Ag102697	46.3061	840.602	400.185	2.41e-07	3.94009
Fxa5Ag201519	923.24	436.558	700.274	2.43e-07	-1.03811
Fxa4Cg201757	27.497	718.129	299.436	2.47e-07	4.42753
Fxa5Ag202264	769.46	81.3445	248.164	2.47e-07	-3.05015
Fxa5Ag201648	0	79.4645	22.6883	2.47e-07	9.0712
Fxa7Cg100388	402.588	1531.02	955.078	2.48e-07	1.83141
Fxa2Bg203317	219.757	655.049	388.792	2.52e-07	1.5056
Fxa3Cg101972	72.7743	273.752	157.346	2.58e-07	1.8136
Fxa1Ag100972	950.295	7485.75	3237.83	2.61e-07	2.8143
Fxa3Cg101086	894.95	4192.77	2366.61	2.61e-07	2.10679
Fxa2Cg202794	10194	2715.64	5863.67	2.69e-07	-1.81379
Fxa5Ag201356	1800.48	384.901	918.119	2.81e-07	-2.1047
Fxa5Cg200661	1463.68	725.758	964.112	2.82e-07	-0.975786
Fxa6Ag102649	43.1113	856.725	370.036	2.82e-07	4.05645
Fxa1Cg102867	260.189	71.1441	131.502	2.84e-07	-1.7784
Fxa5Bg102071	790.326	260.99	470.286	2.85e-07	-1.52139
Fxa3Dg203657	3.7137	106.284	41.6781	2.86e-07	4.49249
Fxa6Ag101058	3.89231	283.033	698.563	2.91e-07	5.77556
Fxa1Bg202346	24.9759	279.084	120.947	2.92e-07	3.27564
Fxa5Ag203138	1335.53	207.022	487.972	2.97e-07	-2.53986
Fxa1Dg200954	10345.7	4727.57	7152.48	2.98e-07	-1.08302
Fxa3Ag101891	2.33674	241.325	72.7269	3.07e-07	6.23115
Fxa6Cg100041	1327.81	534.247	886.323	3.09e-07	-1.25755
Fxa2Cg200183	91.3464	9.51163	38.2184	3.1e-07	-3.08103
Fxa6Bg101035	102.206	1085.64	546.951	3.16e-07	3.21154
Fxa4Dg100746	2892.55	852.478	1281.87	3.2e-07	-1.67454
Fxa7Bg200505	2978.51	851.992	1590.48	3.22e-07	-1.714
Fxa7Bg203001	70.7844	410.493	224.457	3.23e-07	2.39037
Fxa6Ag103173	627.433	2857.44	1530.01	3.23e-07	2.07024
Fxa4Ag101293	42.3055	300.467	178.512	3.25e-07	2.6604
Fxa7Bg202004	249.598	1838.46	906.743	3.28e-07	2.72114
Fxa6Dg100242	195.61	1383.15	703.941	3.34e-07	2.6635
Fxa1Cg101313	190.245	29.4764	89.6458	3.35e-07	-2.52969
Fxa7Bg201527	210.159	53.0255	108.209	3.37e-07	-1.88659
Fxa3Ag100249	1729.2	9589.99	5369.17	3.4e-07	2.33289
Fxa3Cg100959	232.21	37.7649	120.628	3.41e-07	-2.46385
Fxa5Bg100698	409.167	54.2065	206.068	3.43e-07	-2.74479
Fxa6Cg102006	203.766	621.318	437.107	3.43e-07	1.53112
Fxa3Cg102782	382.494	50.981	178.921	3.44e-07	-2.74575
Fxa4Ag103284	3006.59	723.17	2059.52	3.48e-07	-1.94546
Fxa2Cg203116	1794.1	733.901	1227.13	3.48e-07	-1.23229
Fxa6Cg100389	0.688479	141.428	63.7322	3.48e-07	7.13423
Fxa7Bg200670	76.6637	326.157	191.799	3.51e-07	1.97495
Fxa6Cg101719	10.2896	194.833	67.9893	3.54e-07	3.99178
Fxa4Bg101053	87.8136	742.015	423.77	3.6e-07	2.90794
Fxa2Dg202902	2025.65	12110.5	6452.21	3.62e-07	2.43681
Fxa3Ag101485	24418.5	13297	19108.1	3.62e-07	-0.848074
Fxa2Cg201747	540.693	160.096	305.209	3.62e-07	-1.67059
Fxa6Bg101152	2.51535	66.3269	23.041	3.67e-07	4.42136
Fxa3Ag101218	1589.52	7851.44	4473.63	3.73e-07	2.17639
Fxa6Bg101125	1458.61	225.706	685.103	3.73e-07	-2.53749
Fxa5Bg101437	215.727	1551.12	848.753	3.74e-07	2.6841
Fxa2Ag103661	102.601	452.965	239.645	3.75e-07	2.0245
Fxa3Bg202719	1589.94	553.269	886.52	3.76e-07	-1.45092
Fxa7Dg100886	17.1099	259.204	114.273	3.78e-07	3.67758
Fxa1Ag102400	1.05703	64.672	25.9282	3.85e-07	5.52047
Fxa5Dg201010	27.8199	166.668	82.2917	3.89e-07	2.44369
Fxa6Cg101200	15.0616	294.43	116.075	3.97e-07	4.0105
Fxa6Ag105127	625.096	224.209	393.353	3.99e-07	-1.40857
Fxa5Bg102218	41.125	269.399	127.052	3.99e-07	2.5385
Fxa4Bg102934	126.332	783.271	371.451	4.03e-07	2.48693
Fxa5Dg200033	141.479	811.811	409.153	4.05e-07	2.37708
Fxa5Cg201339	217.464	1653.7	886.499	4.08e-07	2.75974
Fxa3Cg102152	10517.8	1223.69	4710.67	4.11e-07	-2.91952
Fxa2Ag103401	5.70329	56.0567	26.5165	4.13e-07	3.07433
Fxa1Bg202135	82.1715	3437.46	1739.97	4.19e-07	5.05203
Fxa3Cg101116	102.403	714.234	350.122	4.2e-07	2.64313
Fxa6Ag102049	3.04662	60.6136	26.7662	4.23e-07	4.08021
Fxa2Bg200238	198.635	40.9837	111.648	4.23e-07	-2.14653
Fxa2Ag100170	276.614	74.5729	170.836	4.3e-07	-1.80229
Fxa4Cg200140	837.146	206.737	481.786	4.33e-07	-1.90566
Fxa3Cg100222	119.603	28.4734	64.4129	4.38e-07	-1.94453
Fxa6Dg102756	32.9799	334.284	235.372	4.53e-07	3.14345
Fxa4Cg200178	0.36855	102.812	31.2851	4.53e-07	7.48748
Fxa4Bg102176	236.651	688.502	405.274	4.55e-07	1.46405
Fxa6Bg103386	6.34315	63.3527	24.5607	4.55e-07	3.09372
Fxa1Dg202929	9.22024	130.34	54.953	4.57e-07	3.60868
Fxa2Ag102001	0	75.1703	29.5792	4.6e-07	8.90123
Fxa5Ag202488	132.925	13.4517	58.7449	4.6e-07	-3.10023
Fxa4Dg102724	436.723	36.3433	174.849	4.63e-07	-3.36254
Fxa2Cg200370	82.6882	12.1096	44.8309	4.76e-07	-2.57298
Fxa7Ag203167	133.698	462.878	267.094	4.76e-07	1.69546
Fxa1Bg200821	14.0837	187.574	59.5517	4.86e-07	3.50788
Fxa2Bg202131	11.1016	161.392	96.2497	4.98e-07	3.61401
Fxa2Ag100995	2.88941	139.836	47.1211	5.1e-07	5.31504
Fxa3Cg101999	128.701	36.8058	78.6875	5.15e-07	-1.70763
Fxa1Cg101156	407.927	1250.64	838.313	5.22e-07	1.53449
Fxa7Dg102090	2756.98	642.384	1330.87	5.29e-07	-1.98689
Fxa5Bg102320	11.8079	202.571	84.0857	5.29e-07	3.84276
Fxa4Ag101832	45.8568	5.55106	26.4324	5.31e-07	-2.85143
Fxa7Bg201799	3983.7	1512.18	2846.51	5.38e-07	-1.33193
Fxa6Dg102069	340.855	4982.5	1859.04	5.38e-07	3.64045
Fxa3Cg100257	237.532	75.0156	131.572	5.42e-07	-1.57175
Fxa3Dg202547	1204.75	366.12	634.004	5.65e-07	-1.63053
Fxa4Cg201019	571.565	64.401	258.035	5.75e-07	-2.95817
Fxa6Dg103241	19.0139	408.459	190.924	5.77e-07	4.13695
Fxa7Ag202378	1543.31	229.125	652.751	5.83e-07	-2.58832
Fxa7Ag201035	25.018	220.845	107.678	5.93e-07	2.94386
Fxa3Bg203598	3063.41	1024.48	2012.01	5.93e-07	-1.49788
Fxa4Bg100117	1.74551	102.058	40.3457	5.95e-07	5.45377
Fxa4Bg102887	319.425	32.5366	127.211	5.95e-07	-3.09392
Fxa7Dg100621	2.2395	77.7761	37.069	5.95e-07	4.68225
Fxa3Cg100977	8365.01	2086.63	4337.82	5.99e-07	-1.89342
Fxa4Ag103214	18.4486	173.641	84.5293	6.04e-07	3.0196
Fxa2Ag100881	1150.99	272.38	830.085	6.07e-07	-1.95908
Fxa1Ag102984	365.813	155.516	238.192	6.1e-07	-1.17773
Fxa6Ag101263	1515.57	232.868	687.792	6.1e-07	-2.54236
Fxa5Dg203082	964.27	233.482	587.463	6.1e-07	-1.93157
Fxa2Bg202647	272.253	27.6377	91.5587	6.24e-07	-3.09473
Fxa6Ag100672	2290.47	963.139	1147.15	6.3e-07	-1.19462
Fxa1Bg202379	407.876	1123.85	702.602	6.43e-07	1.39465
Fxa3Bg200348	105.354	1428.24	687.494	6.54e-07	3.53094
Fxa1Bg201007	11455.2	5048.15	7763.71	6.54e-07	-1.13482
Fxa5Bg102293	2.11957	65.8352	23.779	6.61e-07	4.76827
Fxa7Dg100379	74.5538	363.133	212.833	6.62e-07	2.14811
Fxa5Bg102429	869.016	419.265	614.491	6.68e-07	-1.00863
Fxa5Bg100409	677.579	266.602	457.388	6.73e-07	-1.27838
Fxa3Cg102341	397.079	118.87	190.415	6.77e-07	-1.6545
Fxa2Cg203269	143.53	428.194	272.67	6.9e-07	1.49751
Fxa7Cg101349	436.824	4630.12	2027.87	6.94e-07	3.20317
Fxa4Bg101880	236.998	2774.95	1183.21	7.03e-07	3.33544
Fxa2Ag101849	415.303	2219.69	1211.43	7.03e-07	2.27819
Fxa3Ag103548	2995.68	1085.82	1811.63	7.03e-07	-1.39339
Fxa3Dg200616	0	69.8893	24.7482	7.06e-07	8.7963
Fxa7Ag201769	188.054	68.0502	118.846	7.08e-07	-1.39543
Fxa7Ag200945	24.2974	116.265	58.1264	7.08e-07	2.12741
Fxa7Cg101141	28.0688	201.261	82.2522	7.11e-07	2.67229
Fxa3Ag101870	12.2079	137.013	49.8421	7.15e-07	3.30061
Fxa2Dg203307	125.547	408.062	251.337	7.18e-07	1.60956
Fxa2Ag103753	921.223	277.492	531.827	7.34e-07	-1.63695
Fxa5Ag203553	7274.5	1124.25	2565.01	7.34e-07	-2.52796
Fxa4Ag103249	371.433	98.7694	262.071	7.51e-07	-1.80186
Fxa5Ag200192	129.928	2226.31	1031.87	7.59e-07	3.84397
Fxa4Dg101455	669.423	7994.06	4307.31	7.59e-07	3.36086
Fxa6Dg103996	22.6086	357.635	123.648	7.67e-07	3.72471
Fxa1Bg202465	686.692	128.945	290.832	7.68e-07	-2.27193
Fxa4Ag100333	7.865	1280.2	855.935	7.74e-07	6.84475
Fxa2Bg200543	1.66966	198.133	61.9601	7.91e-07	6.52215
Fxa3Bg201278	13.2007	95.0416	48.6031	7.92e-07	2.65532
Fxa5Bg101695	49.7507	373.347	202.751	7.92e-07	2.73392
Fxa7Dg102859	4.08225	203.541	64.5441	7.92e-07	5.24174
Fxa3Cg103443	867.453	101.551	367.414	7.95e-07	-2.90274
Fxa7Cg100561	71.6663	397.889	190.736	7.98e-07	2.32383
Fxa6Ag104785	527.142	199.64	354.01	7.98e-07	-1.32924
Fxa4Bg102864	210.681	23.1746	91.0806	8.04e-07	-3.00258
Fxa5Dg202881	390.262	103.236	215.111	8.05e-07	-1.81347
Fxa3Bg200336	1396.28	762.111	970.129	8.06e-07	-0.843258
Fxa5Bg100850	17.2888	506.581	209.464	8.17e-07	4.54953
Fxa7Ag201873	195.767	1926.01	913.968	8.41e-07	3.09694
Fxa5Cg200557	1261.87	393.737	785.516	8.41e-07	-1.59145
Fxa1Dg200702	290.384	60.9883	176.739	8.53e-07	-2.11182
Fxa2Bg200215	323.619	1990.52	897.634	8.75e-07	2.46456
Fxa5Dg200817	102.175	565.184	303.32	8.75e-07	2.32134
Fxa6Bg101425	79.6989	212.829	109.955	8.76e-07	1.34993
Fxa3Bg203896	0.688479	86.8788	28.4576	8.82e-07	6.46155
Fxa6Bg100084	314.349	5134.72	2095.87	8.82e-07	3.78001
Fxa5Bg100695	147.56	29.2167	73.9414	8.91e-07	-2.17847
Fxa2Dg202970	478.63	36.6968	161.763	8.91e-07	-3.47324
Fxa3Bg201983	198.704	41.5504	104.13	8.91e-07	-2.12815
Fxa2Cg202493	1739.44	235.681	807.105	9.12e-07	-2.71053
Fxa2Cg201681	62.9271	850.658	415.16	9.16e-07	3.51924
Fxa7Cg101328	93.8364	1153.67	473.833	9.31e-07	3.39356
Fxa7Cg101762	312.743	3157.34	1417.86	9.32e-07	3.1362
Fxa7Cg101039	67.9578	166.23	131.81	9.49e-07	1.22406
Fxa4Bg101633	70.5652	12.5193	59.3794	9.63e-07	-2.329
Fxa6Bg101718	4346.31	1920.91	2726.67	9.66e-07	-1.12557
Fxa1Cg102893	1447.68	171.433	515.541	9.67e-07	-2.88533
Fxa4Dg100127	1039.66	198.641	498.759	9.69e-07	-2.24754
Fxa2Cg200649	194.108	11.8715	76.238	9.71e-07	-3.78572
Fxa7Dg101378	110.599	3229.73	1311.33	9.85e-07	4.55463
Fxa2Cg201480	1.34973	129.083	42.935	9.92e-07	6.30301
Fxa5Dg202050	2.75392	164.361	64.7801	9.92e-07	5.47006
Fxa1Bg200986	97.4675	5.9255	35.7253	9.94e-07	-3.77186
Fxa3Cg103521	43.6851	227.605	135.779	1e-06	2.25164
Fxa5Dg200317	354.599	1299.4	862.387	1.01e-06	1.77629
Fxa6Ag102076	19.2496	116.061	55.2683	1.01e-06	2.46426
Fxa6Ag100368	226.572	1798.61	759.94	1.05e-06	2.80554
Fxa7Ag201026	162.648	6.19568	62.703	1.06e-06	-4.41471
Fxa3Dg202396	11393.5	1726.62	5175.29	1.06e-06	-2.55409
Fxa5Cg201586	423.685	93.3671	185.146	1.06e-06	-2.05879
Fxa3Dg201045	969.356	4498.37	2612.01	1.08e-06	2.08159
Fxa2Dg203111	160.261	39.8659	91.5426	1.08e-06	-1.90391
Fxa7Dg102269	312.323	132.515	201.137	1.08e-06	-1.18313
Fxa2Bg202152	127.22	37.8938	92.0135	1.09e-06	-1.66024
Fxa2Ag100601	514.786	4019.06	2177.87	1.13e-06	2.78339
Fxa6Dg102669	7638.09	2682.1	4940.98	1.13e-06	-1.43206
Fxa4Cg202941	689.899	59.4619	280.797	1.14e-06	-3.31042
Fxa5Bg100372	269.451	75.2341	149.763	1.14e-06	-1.73509
Fxa7Ag201545	1723.93	704.981	1053.92	1.14e-06	-1.23005
Fxa3Bg203133	1475.64	360.165	628.032	1.14e-06	-1.91689
Fxa7Ag201007	186.404	918.613	477	1.14e-06	2.16622
Fxa3Dg200822	15.8836	385.054	159.346	1.15e-06	4.28762
Fxa6Ag103724	72.6505	2446.92	1013.89	1.15e-06	4.74325
Fxa6Dg103234	14056.8	5654.83	8676.3	1.16e-06	-1.25194
Fxa4Cg200184	11.2867	239.104	90.8077	1.16e-06	4.12416
Fxa3Cg101202	131.853	703.926	379.604	1.17e-06	2.27082
Fxa3Bg202545	1440.44	3815.81	2593.92	1.21e-06	1.335
Fxa2Ag103761	726.252	171.028	377.346	1.22e-06	-1.96273
Fxa1Dg202699	2665.8	559.05	1504.26	1.23e-06	-2.11438
Fxa6Bg104377	11663.8	1953.12	5647.54	1.24e-06	-2.41873
Fxa2Cg203035	314.119	62.4387	166.711	1.24e-06	-2.19289
Fxa3Bg200493	794.956	72.5578	322.378	1.25e-06	-3.23081
Fxa6Cg104252	2.33674	107.139	49.7873	1.26e-06	5.08547
Fxa1Cg102828	7042.04	1607.25	3935.35	1.28e-06	-2.00438
Fxa3Cg100151	1844.2	482.079	934.479	1.31e-06	-1.82556
Fxa5Cg200149	0	36.0085	14.2231	1.33e-06	7.79491
Fxa1Bg202035	2.80805	82.7786	41.4561	1.33e-06	4.61719
Fxa5Ag200988	632.657	284.876	425.468	1.33e-06	-1.09876
Fxa5Ag201659	164.937	671.111	409.869	1.33e-06	1.90692
Fxa2Ag103046	3191.17	851.706	1905.27	1.37e-06	-1.7986
Fxa6Dg104368	355.836	54.9316	192.719	1.38e-06	-2.52754
Fxa3Cg103441	518.714	221.649	349.097	1.4e-06	-1.17026
Fxa6Bg102823	10546.9	3240.39	6174.79	1.4e-06	-1.60956
Fxa6Bg103455	104.988	996.337	719.167	1.4e-06	3.03903
Fxa2Dg202861	4379.33	892.468	1771.83	1.41e-06	-2.15545
Fxa7Dg101972	501.804	150.515	277.408	1.41e-06	-1.64001
Fxa3Cg103446	148.206	45.3542	97.0811	1.41e-06	-1.59965
Fxa6Bg103425	84.6402	1897.94	715.595	1.41e-06	4.19414
Fxa3Cg100897	78.3392	1791.85	677.609	1.41e-06	4.22085
Fxa6Bg104591	35.8907	410.309	174.149	1.43e-06	3.28264
Fxa3Ag101957	96.9664	400.391	226.046	1.45e-06	1.92593
Fxa3Bg200779	276.307	678.44	456.236	1.45e-06	1.23255
Fxa1Ag102629	11.8079	343.349	116.651	1.46e-06	4.53334
Fxa3Cg102745	296.603	104.929	211.04	1.47e-06	-1.4196
Fxa6Dg102479	206.11	40.7206	108.33	1.49e-06	-2.19932
Fxa7Cg101337	1.42558	48.692	21.5249	1.49e-06	4.7194
Fxa5Cg200698	1497.21	498.358	917.613	1.51e-06	-1.50324
Fxa6Dg104200	25921.5	4637.2	13108.6	1.53e-06	-2.32803
Fxa1Bg202711	1901.02	565.102	1181.25	1.53e-06	-1.65108
Fxa4Ag103506	364.248	73.7357	174.842	1.54e-06	-2.17075
Fxa3Cg100994	0	101.364	30.3983	1.55e-06	9.32523
Fxa6Dg100929	356.495	108.845	216.333	1.57e-06	-1.62222
Fxa2Ag103549	2666.58	551.049	1367.61	1.58e-06	-2.13329
Fxa4Ag103224	389.572	1091.04	774.279	1.59e-06	1.40903
Fxa6Bg100459	0.36855	106.947	30.2167	1.6e-06	7.49244
Fxa6Dg101058	0.7371	69.6926	25.3148	1.6e-06	6.13314
Fxa3Ag103449	321.32	90.814	202.543	1.6e-06	-1.71363
Fxa5Ag202708	865.743	161.124	402.397	1.6e-06	-2.27594
Fxa4Cg200240	26.6128	274.593	167.222	1.61e-06	3.14325
Fxa5Cg203126	1.37696	58.4199	23.5137	1.61e-06	4.97997
Fxa2Dg201589	158.49	30.0166	101.312	1.62e-06	-2.25348
Fxa3Cg100132	75.5875	3153.5	1088.72	1.62e-06	5.02432
Fxa3Bg203220	3692.79	1820.32	2499.25	1.63e-06	-0.979782
Fxa4Cg202850	25.7502	171.976	86.8381	1.65e-06	2.56438
Fxa3Ag102191	0	96.2142	41.0559	1.66e-06	9.1919
Fxa6Bg103500	10.5068	218.977	83.5625	1.68e-06	4.07605
Fxa1Dg200407	19.4194	122.569	46.0855	1.7e-06	2.48532
Fxa3Dg200886	225.935	66.7843	149.959	1.75e-06	-1.66388
Fxa5Bg101376	11.1466	94.2857	50.2747	1.75e-06	2.85204
Fxa2Bg201233	1168.87	355.182	704.524	1.76e-06	-1.61889
Fxa2Cg202280	966.862	10562.4	4918.13	1.76e-06	3.23383
Fxa3Cg100868	11.92	151.602	77.2639	1.8e-06	3.41706
Fxa2Ag102008	0	90.9327	32.2906	1.82e-06	9.12774
Fxa5Ag201491	763.924	6129.81	3251.83	1.88e-06	2.81539
Fxa6Bg103443	13368.7	4946.42	8148.13	1.89e-06	-1.36641
Fxa6Ag101162	138.909	1425.01	738.193	1.89e-06	3.14091
Fxa6Bg103331	1529.69	8720.97	4853.88	1.89e-06	2.35626
Fxa1Dg200474	721.691	2488.15	1324.65	1.92e-06	1.68418
Fxa4Ag103414	281.098	4233.58	1508.27	1.93e-06	3.65618
Fxa6Dg101566	3642.78	1020.04	2140.24	1.93e-06	-1.73293
Fxa4Cg202830	20.2706	121.091	55.818	1.93e-06	2.41104
Fxa4Ag100148	52.3533	357.513	185.921	2e-06	2.59905
Fxa4Cg200160	5.09066	108.544	51.9092	2.01e-06	4.07069
Fxa7Dg101472	610.395	190.444	371.111	2.04e-06	-1.58732
Fxa2Ag100586	113.888	3.7301	33.5061	2.04e-06	-4.55348
Fxa7Ag201271	8.35899	72.1473	31.5118	2.05e-06	2.86645
Fxa4Bg100920	858.018	305.1	495.336	2.05e-06	-1.41439
Fxa3Ag100981	314.344	2340.95	1304.07	2.05e-06	2.71592
Fxa7Ag203138	117.111	329.747	184.311	2.06e-06	1.4201
Fxa5Dg203327	149.194	359.354	324.891	2.09e-06	1.20007
Fxa6Bg101912	483.877	184.442	298.156	2.09e-06	-1.32192
Fxa1Cg102863	209.89	80.3784	139.254	2.1e-06	-1.31525
Fxa7Bg201983	278.753	57.0685	211.573	2.14e-06	-2.14107
Fxa3Dg200501	31.0633	199.254	81.8429	2.14e-06	2.5065
Fxa6Dg103638	67.4214	334.029	202.704	2.15e-06	2.16257
Fxa3Cg101395	10612.3	1631.4	5153.83	2.19e-06	-2.5048
Fxa5Ag200641	368.053	39.2522	143.422	2.19e-06	-3.01243
Fxa6Ag102958	931.898	189.55	398.27	2.2e-06	-2.15388
Fxa6Ag103349	348.56	1947.75	1262.26	2.24e-06	2.32876
Fxa6Cg101713	4265.07	1167.08	1864.5	2.31e-06	-1.75943
Fxa6Cg104300	8988.81	1613.57	4655.59	2.34e-06	-2.3188
Fxa5Bg102109	458.022	199.329	329.598	2.36e-06	-1.14117
Fxa7Bg202317	26.4329	91.2043	57.7489	2.39e-06	1.6852
Fxa1Cg101623	72.1886	390.173	169.505	2.42e-06	2.28765
Fxa2Bg200176	318.323	1085.09	656.326	2.45e-06	1.6648
Fxa6Ag100866	251.154	56.4269	144.057	2.48e-06	-2.01823
Fxa6Bg102098	282.291	2181.52	980.749	2.48e-06	2.75947
Fxa7Cg100884	24.1503	130.518	56.774	2.48e-06	2.29267
Fxa1Dg201038	0.319929	89.9729	28.2424	2.51e-06	7.26334
Fxa3Bg200843	599.276	212.091	421.694	2.51e-06	-1.42033
Fxa5Cg200781	2358.76	485.979	946.722	2.54e-06	-2.1348
Fxa3Cg102465	2302.19	1050.15	1389.31	2.54e-06	-1.0798
Fxa6Ag100682	134.161	648.183	257.751	2.54e-06	2.1324
Fxa6Ag103215	162.292	2770.3	1420.98	2.56e-06	3.81489
Fxa1Ag102631	689.702	168.034	339.397	2.56e-06	-1.9143
Fxa5Cg201946	96.9926	523.778	274.956	2.57e-06	2.27407
Fxa6Ag103837	40.6005	607.25	218.189	2.57e-06	3.63616
Fxa4Bg102905	8.88119	168.202	66.0765	2.58e-06	3.91544
Fxa7Cg100031	2547.93	979.565	1560.3	2.59e-06	-1.3076
Fxa5Dg200925	1084.5	484.45	705.575	2.62e-06	-1.10855
Fxa1Cg100238	891.052	311.882	509.442	2.64e-06	-1.43193
Fxa2Cg201202	129.206	4.29396	65.2286	2.67e-06	-4.5571
Fxa6Cg104509	290.418	1936.33	980.478	2.67e-06	2.56047
Fxa5Bg101943	1494.6	95.0567	781.441	2.68e-06	-3.69383
Fxa3Dg200611	19.9983	229.822	108.973	2.68e-06	3.28317
Fxa2Dg203029	137.888	1260.18	575.141	2.69e-06	2.98108
Fxa1Ag101305	69.9222	487.648	341.096	2.69e-06	2.62183
Fxa4Dg102716	720.034	26.5346	268.79	2.69e-06	-4.42279
Fxa1Ag101704	969.98	141.883	444.742	2.69e-06	-2.58997
Fxa2Cg203450	211.951	775.389	463.38	2.72e-06	1.76299
Fxa2Cg203217	482.604	170.472	255.895	2.74e-06	-1.42094
Fxa5Bg100450	332.683	1325.07	709.963	2.74e-06	1.87435
Fxa1Ag101417	714.782	102.186	397.246	2.77e-06	-2.61501
Fxa6Ag102556	24.1023	228.016	91.218	2.77e-06	3.01377
Fxa6Cg101820	1179.83	4424.8	2576.55	2.84e-06	1.79488
Fxa6Cg101494	913.851	369.6	648.921	2.85e-06	-1.23755
Fxa5Bg100369	2721.97	525.599	1128.53	2.85e-06	-2.21884
Fxa7Dg101239	369.661	3591.65	1641.23	2.86e-06	3.0617
Fxa7Cg100961	18.1941	326.543	133.657	2.89e-06	3.86884
Fxa2Dg200666	31.8785	255.453	93.9993	2.9e-06	2.7969
Fxa2Dg201751	542.11	2398.37	1253.23	2.9e-06	2.00761
Fxa3Ag102240	1064.56	408.522	740.681	2.9e-06	-1.30852
Fxa2Dg201249	14.4749	320.128	126.868	2.92e-06	4.14344
Fxa6Bg102672	112.375	1274.57	442.359	2.92e-06	3.27134
Fxa3Ag101732	669.729	276.39	420.104	2.92e-06	-1.2132
Fxa5Cg200884	87.597	668.795	340.526	2.93e-06	2.73512
Fxa3Cg103250	10.4682	499.138	136.931	2.94e-06	5.19045
Fxa1Ag101447	535.87	4574.49	2155.01	2.95e-06	2.88855
Fxa6Ag102997	47.753	424.577	208.779	2.95e-06	2.9402
Fxa4Dg100591	229.132	640.019	431.405	2.98e-06	1.40118
Fxa2Bg202432	30.3028	132.726	74.0727	2.99e-06	1.98694
Fxa4Cg202593	4.69488	91.5595	41.4238	2.99e-06	3.97076
Fxa7Ag201525	77.557	5.03117	44.0115	2.99e-06	-3.67047
Fxa2Ag101788	1.00841	90.5382	31.7035	3e-06	5.94847
Fxa6Dg104202	162.896	361.953	275.207	3.03e-06	1.09787
Fxa5Dg200810	1.10565	161.576	54.8327	3.07e-06	6.66022
Fxa7Dg100870	9.22251	109.775	54.7477	3.07e-06	3.29447
Fxa2Ag101714	193.639	45.561	115.291	3.07e-06	-1.95561
Fxa3Cg101629	5.7678	107.983	42.1857	3.08e-06	3.92276
Fxa2Ag102706	822.193	4288.38	2463.18	3.08e-06	2.23051
Fxa4Bg102826	57.5532	682.55	315.615	3.09e-06	3.32734
Fxa7Ag201316	688.11	98.0698	296.715	3.09e-06	-2.62036
Fxa3Cg102939	261.007	2473.37	1521.27	3.11e-06	3.02837
Fxa5Dg200671	291.415	43.0922	149.145	3.15e-06	-2.57775
Fxa6Cg104277	1171.15	332.144	703.165	3.17e-06	-1.70641
Fxa1Dg202179	134.575	2151.57	984.477	3.18e-06	3.72361
Fxa1Ag101738	6239.97	3008.1	4409.3	3.2e-06	-1.004
Fxa3Bg200983	15036.5	3627	7827.47	3.3e-06	-1.91502
Fxa6Ag103840	348.225	8687.04	3551.7	3.31e-06	4.32273
Fxa3Ag100352	76.4695	568.44	330.248	3.33e-06	2.6984
Fxa2Ag101055	195.299	74.9639	133.11	3.34e-06	-1.31062
Fxa5Bg102804	1129.72	225.815	423.748	3.37e-06	-2.16901
Fxa2Dg202907	48.5375	192.42	110.964	3.38e-06	1.86996
Fxa3Bg203553	11393.6	1550.15	4923.48	3.39e-06	-2.68042
Fxa3Bg203135	874.138	205.485	505.822	3.44e-06	-1.95728
Fxa6Ag100087	528.417	5512.69	2601.42	3.45e-06	3.15307
Fxa6Ag102720	1932.43	178.893	846.008	3.45e-06	-3.19242
Fxa1Bg201185	350.688	764.25	521.637	3.47e-06	1.07245
Fxa3Bg200880	56.029	867.504	473.815	3.49e-06	3.6745
Fxa2Cg200962	206.081	42.3038	103.074	3.5e-06	-2.13548
Fxa2Ag101754	31.2192	210.822	104.575	3.5e-06	2.57945
Fxa5Cg200817	116.049	1338.56	532.934	3.51e-06	3.28354
Fxa6Ag100906	1.10565	86.8587	40.5533	3.52e-06	5.83
Fxa4Bg101375	9.03127	119.066	44.323	3.54e-06	3.4873
Fxa1Bg200119	215.011	1190.1	526.522	3.55e-06	2.30817
Fxa4Dg102608	52.7461	5.14274	30.1128	3.56e-06	-3.14828
Fxa3Dg201603	3.62651	88.853	31.8677	3.56e-06	4.33723
Fxa6Dg101160	44.6659	328.844	172.164	3.56e-06	2.6774
Fxa5Bg100261	157.126	36.6398	88.9573	3.62e-06	-1.95825
Fxa3Bg201517	3.43656	62.75	32.006	3.64e-06	3.99601
Fxa7Cg101897	3.66508	164.09	85.9086	3.65e-06	5.03936
Fxa1Bg200442	46.9569	293.129	229.724	3.69e-06	2.46427
Fxa1Ag100046	1206.67	396.186	831.21	3.69e-06	-1.51257
Fxa2Bg202726	680.013	5210.72	3004.71	3.77e-06	2.74222
Fxa2Cg201034	3419.84	1205.25	2170.3	3.78e-06	-1.42132
Fxa6Bg100769	23.6102	137.369	55.0132	3.82e-06	2.35714
Fxa7Cg102783	315.913	55.5657	164.695	3.84e-06	-2.34315
Fxa3Ag100946	388.549	113.658	252.211	3.86e-06	-1.66461
Fxa3Bg203855	4.15227	59.7841	24.4608	3.88e-06	3.59594
Fxa7Cg102696	147.719	10.5351	58.5492	3.88e-06	-3.56717
Fxa6Bg102762	625.244	243.024	391.645	3.9e-06	-1.29048
Fxa4Cg202742	271.655	96.5439	172.155	3.9e-06	-1.40529
Fxa3Bg200907	3.9137	618.994	189.626	3.92e-06	6.77266
Fxa5Dg200867	63.6004	488.278	324.29	3.92e-06	2.73967
Fxa4Cg200353	248.829	991.322	746.671	3.98e-06	1.86852
Fxa6Bg101688	440.258	168.401	276.121	3.98e-06	-1.30584
Fxa6Cg103594	0	39.1626	19.5196	4e-06	7.83924
Fxa3Cg101828	410.388	138.742	264.485	4.04e-06	-1.47645
Fxa7Cg102407	232.725	4027.68	2286.76	4.04e-06	3.82262
Fxa4Cg200540	580.258	111.561	290.792	4.04e-06	-2.22076
Fxa5Cg202981	228.808	1521.74	855.436	4.04e-06	2.54879
Fxa4Cg202865	54.9412	7.84196	29.6108	4.06e-06	-2.60279
Fxa5Ag200545	35.2499	213.965	98.9155	4.07e-06	2.41385
Fxa3Dg203339	21128	4188.06	9822.53	4.1e-06	-2.17979
Fxa6Dg104438	394.967	999.362	639.159	4.11e-06	1.26866
Fxa4Bg100206	0.449911	424.764	111.755	4.11e-06	9.16502
Fxa3Dg201291	46.1968	420.916	199.355	4.12e-06	2.96334
Fxa5Cg201564	198.924	1296.98	664.939	4.14e-06	2.52425
Fxa7Dg100910	0.319929	128.39	64.8274	4.15e-06	7.70065
Fxa1Dg200238	6.32176	120.21	54.1278	4.17e-06	3.89798
Fxa3Ag104109	796.231	194.408	450.094	4.28e-06	-1.90326
Fxa3Bg201110	1446.43	6123.46	3432.08	4.39e-06	1.94771
Fxa5Cg202809	1.64827	43.4992	17.3396	4.41e-06	4.26905
Fxa7Bg201165	1.64827	73.0413	43.6639	4.46e-06	4.97489
Fxa7Dg101813	392.299	168.727	277.554	4.47e-06	-1.16111
Fxa7Cg101221	580.629	71.3822	237.315	4.47e-06	-2.8115
Fxa6Cg101562	47.7962	2.08382	17.8588	4.53e-06	-4.22757
Fxa4Bg102233	202.5	21.502	77.8158	4.6e-06	-3.01662
Fxa6Cg100498	406.489	111.134	227.624	4.67e-06	-1.75367
Fxa5Bg100900	606.918	222.238	393.316	4.71e-06	-1.37409
Fxa2Ag103727	398.077	95.7832	206.168	4.73e-06	-1.9216
Fxa4Bg101206	107.594	13.5588	54.5287	4.73e-06	-2.79659
Fxa3Dg200662	672.546	79.6287	290.419	4.8e-06	-2.86248
Fxa6Dg103242	3.39377	88.5496	61.8934	4.81e-06	4.30995
Fxa1Dg202087	3.56784	80.9311	34.4235	4.81e-06	4.09925
Fxa4Cg202973	140.718	50.1575	79.769	4.81e-06	-1.40704
Fxa2Ag103921	52.8265	623.506	240.636	4.81e-06	3.31045
Fxa7Bg202251	3195.91	1365.74	2141.88	4.83e-06	-1.16381
Fxa3Bg203307	1214.23	238.284	443.014	4.83e-06	-2.19067
Fxa3Dg202983	2213.29	665.795	994.501	4.84e-06	-1.62676
Fxa1Ag100704	919.403	352.121	596.716	4.84e-06	-1.3089
Fxa7Ag201715	467.816	74.3208	201.615	4.85e-06	-2.46936
Fxa7Bg202710	362.684	10.9288	97.8027	4.85e-06	-4.66498
Fxa6Cg104053	333.208	156.545	234.269	4.9e-06	-1.03957
Fxa5Ag200711	90.3078	377.535	274.87	4.93e-06	1.929
Fxa5Cg200680	105.797	14.1258	79.4349	5.02e-06	-2.68461
Fxa7Ag202120	475.274	189.605	346.146	5.06e-06	-1.25201
Fxa2Bg201270	1.79413	69.0413	21.1956	5.09e-06	4.85709
Fxa3Bg202724	1789.19	694.441	1209.09	5.11e-06	-1.28967
Fxa6Ag102552	4.62487	87.9615	35.9785	5.15e-06	3.88357
Fxa6Ag104216	193.849	62.6428	113.764	5.17e-06	-1.53988
Fxa1Dg200616	1109.12	372.329	664.357	5.18e-06	-1.48175
Fxa2Bg202194	276.218	73.9928	165.226	5.2e-06	-1.78796
Fxa6Cg104035	26.1697	480.583	199.906	5.22e-06	3.88817
Fxa2Dg201560	6.85303	150.55	62.8513	5.23e-06	4.10315
Fxa3Ag100366	227.355	760.149	413.7	5.24e-06	1.63658
Fxa6Dg103836	69.6275	304.98	172.437	5.24e-06	1.98882
Fxa2Bg200393	128.249	14.2405	50.6182	5.25e-06	-2.93398
Fxa2Bg202215	2679.32	1197.55	1870.13	5.26e-06	-1.10312
Fxa6Bg100849	26.5304	474.013	209.561	5.28e-06	3.85358
Fxa4Dg102097	937.669	374.466	606.091	5.29e-06	-1.25399
Fxa6Cg102662	4.62487	140.76	52.0749	5.33e-06	4.51833
Fxa5Dg201562	165.409	604.968	348.897	5.34e-06	1.75447
Fxa6Ag100013	0.959787	103.833	82.2841	5.39e-06	6.11808
Fxa6Bg100624	3904.8	1243.59	1702.7	5.39e-06	-1.55044
Fxa3Ag100737	62.0526	392.967	207.432	5.41e-06	2.47477
Fxa5Ag202939	31.1158	403.195	189.2	5.43e-06	3.42644
Fxa5Bg100305	68.7423	838.94	358.843	5.49e-06	3.35067
Fxa2Dg203284	244.913	85.5198	126.276	5.49e-06	-1.42766
Fxa3Bg202554	1449.19	497.742	806.784	5.5e-06	-1.45186
Fxa5Ag203613	128.29	28.5103	68.4318	5.51e-06	-2.00625
Fxa3Cg100515	4874.85	214.239	1694.77	5.56e-06	-4.16409
Fxa2Dg200583	59.5506	0.28784	16.7358	5.56e-06	-6.8404
Fxa4Ag100209	2.16268	484.194	133.963	5.6e-06	7.19346
Fxa3Ag102018	2003.76	5689.68	3599.59	5.67e-06	1.42279
Fxa7Cg100383	2359.83	65.8582	829.067	5.67e-06	-4.77433
Fxa4Ag102094	109.471	1946.37	749.524	5.67e-06	3.85004
Fxa3Dg200016	3.21971	35.4634	18.993	5.68e-06	3.17417
Fxa5Dg202076	0	89.7639	27.8188	5.69e-06	9.10435
Fxa5Cg200371	228.305	50.1737	85.7053	5.71e-06	-2.04358
Fxa3Bg201146	431.475	181.047	301.306	5.72e-06	-1.18408
Fxa3Ag101736	16.7562	471.383	190.545	5.73e-06	4.45261
Fxa7Cg100962	11.8837	189.482	76.7342	5.74e-06	3.68798
Fxa2Dg203116	1649.17	514.742	1071.8	5.74e-06	-1.5755
Fxa3Bg200714	573.945	2421.2	1456.99	5.75e-06	1.94133
Fxa1Cg101639	628.752	40.6927	231.517	5.8e-06	-3.65478
Fxa6Cg100839	6.7117	132.01	48.58	5.8e-06	3.96757
Fxa4Dg102156	343.207	68.0026	177.206	5.81e-06	-2.18312
Fxa3Bg203147	1746	710.684	1301.49	5.81e-06	-1.22562
Fxa6Ag100808	1.91957	61.0774	30.7761	5.82e-06	4.50346
Fxa7Bg201573	0	69.7338	18.4513	5.93e-06	8.77221
Fxa5Bg101466	1154.74	463.593	846.596	5.99e-06	-1.24328
Fxa1Bg202572	367.789	52.6539	161.065	6.01e-06	-2.60762
Fxa3Bg200881	81.6259	1189.82	648.037	6.01e-06	3.58266
Fxa3Dg201213	2043	758.324	1267.03	6.01e-06	-1.35188
Fxa5Cg200529	1817.06	9404.28	4880.87	6.01e-06	2.20571
Fxa6Bg100263	574.193	4081.27	1901.63	6.01e-06	2.63345
Fxa2Ag103067	993.564	229.248	567.818	6.02e-06	-1.97365
Fxa3Bg200170	7.40569	71.9226	34.7598	6.02e-06	3.04963
Fxa6Cg102714	5235.58	1666.24	3108.75	6.12e-06	-1.54861
Fxa1Dg201386	42.6987	769.908	439.419	6.14e-06	3.86373
Fxa7Dg102225	1890.09	115.548	673.767	6.15e-06	-3.7286
Fxa6Ag101553	203.127	482.688	321.012	6.17e-06	1.18364
Fxa7Ag203226	520.12	4000.97	1963.18	6.2e-06	2.73867
Fxa5Cg201358	532.576	154.601	358.217	6.2e-06	-1.66851
Fxa6Cg102264	7.80601	67.6002	29.4417	6.2e-06	2.88838
Fxa6Bg100052	9685.39	2369.07	4924.74	6.23e-06	-1.89721
Fxa3Bg201026	468.568	179.534	309.269	6.23e-06	-1.30744
Fxa2Ag102645	250.391	92.5831	147.827	6.24e-06	-1.35259
Fxa6Cg101321	520.159	25.8945	175.087	6.28e-06	-3.99744
Fxa7Ag201772	1018.75	123.284	394.869	6.29e-06	-2.8219
Fxa4Ag101629	8601.98	3485.43	5491.27	6.31e-06	-1.23275
Fxa6Ag103723	51.7319	329.833	175.754	6.34e-06	2.48204
Fxa4Cg202534	450.557	1138.96	796.009	6.36e-06	1.26439
Fxa7Ag200887	525.087	230.793	398.038	6.36e-06	-1.1252
Fxa7Bg201489	116.645	821.226	392.556	6.42e-06	2.61754
Fxa5Ag202122	1035.82	375.384	651.122	6.46e-06	-1.37812
Fxa7Dg101530	632.972	46.0927	236.712	6.5e-06	-3.4984
Fxa2Dg202051	604.718	220.418	402.186	6.5e-06	-1.36888
Fxa5Cg200183	517.582	1597.6	1052.65	6.5e-06	1.52797
Fxa6Bg101351	432.421	26.0326	157.202	6.56e-06	-3.74564
Fxa6Ag104211	1440.35	5448.6	2948.64	6.56e-06	1.79
Fxa1Bg202027	35.8353	198.43	101.558	6.56e-06	2.27825
Fxa5Ag202215	2.09818	104.331	33.8339	6.56e-06	5.18062
Fxa1Bg202192	92.4997	306.041	205.079	6.56e-06	1.62074
Fxa7Bg202561	0.688479	96.812	31.0796	6.59e-06	6.53856
Fxa4Dg102634	520.264	158.622	347.286	6.63e-06	-1.60816
Fxa3Cg100381	39.4427	3064.44	1142.67	6.64e-06	5.7996
Fxa2Cg200454	1.74551	49.8905	19.4838	6.65e-06	4.42619
Fxa6Dg100041	1547.59	804.152	1207.02	6.69e-06	-0.902923
Fxa4Ag101456	284.568	99.0892	186.708	6.7e-06	-1.42986
Fxa4Ag100158	5.35062	184.31	54.9543	6.7e-06	4.71154
Fxa4Ag100357	105.138	1155.91	803.045	6.7e-06	3.20675
Fxa2Ag100292	39.618	521.612	240.176	6.7e-06	3.4427
Fxa3Ag100457	364.587	58.2943	136.504	6.7e-06	-2.46579
Fxa3Bg200350	0.688479	96.8124	40.6135	6.73e-06	6.52495
Fxa3Ag104340	0	37.5212	12.0862	6.77e-06	7.79834
Fxa4Cg200118	1360.74	210.445	601.075	6.78e-06	-2.50637
Fxa1Dg201555	177.778	947.868	468.424	6.79e-06	2.25337
Fxa5Bg101309	746.943	189.832	411.876	6.81e-06	-1.84545
Fxa7Bg201791	579.281	158.96	348.201	6.81e-06	-1.74801
Fxa3Dg202080	9.88376	76.8146	40.1926	6.82e-06	2.72611
Fxa1Bg200257	63.8062	286.629	157.315	6.86e-06	2.01289
Fxa3Cg100871	22.2086	346.529	184.483	6.92e-06	3.66634
Fxa3Ag103889	19219	3343.49	8496.27	6.96e-06	-2.34427
Fxa4Ag102952	67.7624	620.375	296.085	6.96e-06	2.96268
Fxa2Cg200343	582.949	25.2688	242.242	6.96e-06	-4.17622
Fxa6Cg100012	0.959787	89.917	67.906	6.97e-06	5.91795
Fxa6Ag100790	157.042	28.5186	68.8873	6.97e-06	-2.30025
Fxa3Dg200270	3.60512	55.4533	24.468	7.03e-06	3.63504
Fxa5Cg200895	110.563	1368.17	567.464	7.03e-06	3.36519
Fxa6Ag103242	433.136	97.2468	230.833	7.2e-06	-2.00068
Fxa6Dg100621	207.284	41.8694	108.12	7.26e-06	-2.13629
Fxa6Cg103323	38.9205	968.505	339.839	7.45e-06	4.29049
Fxa7Ag201586	273.688	17.6178	112.272	7.49e-06	-3.6609
Fxa3Ag100849	548.9	161.537	242.194	7.51e-06	-1.65342
Fxa1Ag102385	702.421	292.368	483.567	7.6e-06	-1.19623
Fxa4Cg202142	651.149	194.098	421.082	7.6e-06	-1.63417
Fxa6Dg102238	9.63871	119.293	52.4674	7.61e-06	3.33087
Fxa1Cg100758	1421.22	137.183	511.536	7.61e-06	-3.119
Fxa1Cg101910	40.0521	428.499	173.04	7.64e-06	3.16628
Fxa2Cg201614	1070.3	3002.42	2079.51	7.65e-06	1.4028
Fxa5Cg202921	917.442	136.583	346.445	7.66e-06	-2.5452
Fxa3Bg203303	76.6731	1231.22	352.117	7.66e-06	3.71202
Fxa1Ag102475	88.2881	591.576	320.534	7.66e-06	2.55076
Fxa2Bg203182	365.24	2986.55	1347.96	7.67e-06	2.81446
Fxa6Cg102035	23.0339	124.461	62.8763	7.67e-06	2.2477
Fxa4Ag101889	1391.02	11301.8	6510.39	7.68e-06	2.8067
Fxa1Bg201776	0	36.6018	15.4715	7.68e-06	7.7239
Fxa2Bg203691	69.6845	691.702	408.442	7.7e-06	3.06705
Fxa2Dg201423	125.159	1363.73	620.072	7.7e-06	3.1939
Fxa7Ag203084	94.4624	7396.97	2677.94	7.75e-06	5.80524
Fxa3Bg200259	279.882	70.228	129.015	7.76e-06	-1.85657
Fxa3Dg201750	6884.97	950.982	3204.1	7.78e-06	-2.64666
Fxa3Bg201839	1287.72	549.474	939.636	7.83e-06	-1.16286
Fxa3Ag103169	236.701	754.911	476.146	7.84e-06	1.56759
Fxa5Dg203053	51.0211	253.95	136.278	7.86e-06	2.14775
Fxa5Dg200937	352.916	2548.14	1418.97	7.87e-06	2.65119
Fxa1Ag102108	201.316	60.9102	126.836	7.87e-06	-1.61699
Fxa6Bg104373	635.639	179.939	372.271	7.91e-06	-1.70112
Fxa1Cg102946	8600.08	28163.7	17440.7	7.95e-06	1.60608
Fxa2Ag103771	1188.13	128.097	526.009	7.98e-06	-2.97259
Fxa6Bg102589	2140.38	754.068	1331.4	7.98e-06	-1.4155
Fxa5Bg100367	9.35703	80.3543	33.4335	8e-06	2.86875
Fxa6Cg100464	689.952	357.158	482.099	8.02e-06	-0.907177
Fxa2Bg201495	431.892	54.7603	185.67	8.02e-06	-2.75206
Fxa6Dg102773	185.527	507.412	340.865	8.02e-06	1.36554
Fxa1Cg101728	3395.29	1500.92	2389.22	8.03e-06	-1.11623
Fxa4Cg202890	1.45832	77.384	22.0914	8.05e-06	5.28933
Fxa1Cg101021	4426.75	2042.63	2948.93	8.09e-06	-1.06086
Fxa6Cg101038	46.2033	5.27638	18.5924	8.09e-06	-2.93579
Fxa3Ag101943	12411.8	1836.52	5156.45	8.1e-06	-2.55079
Fxa1Ag101848	23.2449	197.562	84.2356	8.16e-06	2.8618
Fxa5Ag200189	0.319929	86.6538	36.0915	8.16e-06	7.15083
Fxa7Ag202440	2114.61	5056.45	3298.91	8.21e-06	1.19088
Fxa6Bg100503	98.0704	20.8119	48.7025	8.21e-06	-2.07928
Fxa6Bg100065	134.14	32.7205	74.7112	8.23e-06	-1.87667
Fxa5Ag201892	20.8012	541.273	193.905	8.24e-06	4.33514
Fxa2Cg200565	408.364	70.7678	186.524	8.29e-06	-2.35086
Fxa5Dg202946	119.972	497.583	240.205	8.32e-06	1.91365
Fxa6Bg100283	76.5058	10.3797	35.1745	8.39e-06	-2.63894
Fxa3Cg100330	52.0252	401.781	206.218	8.48e-06	2.72879
Fxa7Cg100984	286.761	56.898	136.011	8.49e-06	-2.1689
Fxa5Dg201801	5151.39	2345.22	3462.09	8.5e-06	-1.0771
Fxa5Bg100725	1209.33	678.643	898.461	8.53e-06	-0.798776
Fxa7Bg200468	420.026	1159.07	787.396	8.57e-06	1.37798
Fxa1Dg201421	574.414	27.2131	194.834	8.73e-06	-4.05439
Fxa3Cg103786	23.1457	188.388	91.0555	8.75e-06	2.7807
Fxa6Ag101453	96.2724	426.053	244.785	8.75e-06	1.99939
Fxa4Dg102065	58.9619	315.92	168.881	8.75e-06	2.24365
Fxa7Ag202676	221.529	35.1842	125.562	8.75e-06	-2.47039
Fxa6Dg103919	0.36855	94.8004	26.7278	8.75e-06	7.24745
Fxa1Dg201912	446.004	149.726	267.385	8.75e-06	-1.47561
Fxa3Cg100671	372.142	40.0671	139.508	8.75e-06	-2.97533
Fxa7Bg203113	4.9448	314.372	100.248	8.75e-06	5.49063
Fxa7Ag202472	20.4369	312.942	112.773	8.77e-06	3.64135
Fxa6Bg103562	87.2168	206.158	137.563	8.9e-06	1.1789
Fxa4Dg101037	1415.88	352.793	784.64	8.9e-06	-1.86915
Fxa3Bg201611	535.367	133.246	320.398	8.91e-06	-1.87243
Fxa6Cg103462	24.3191	143.365	79.1049	8.97e-06	2.36885
Fxa3Ag102121	121.269	364.885	231.084	9e-06	1.49242
Fxa7Cg101665	337.82	20.6196	122.176	9.03e-06	-3.72094
Fxa4Dg102841	56.8138	237.01	134.253	9.07e-06	1.91429
Fxa5Dg202320	29.096	197.799	114.694	9.09e-06	2.56703
Fxa3Dg200823	279.837	1309.61	860.648	9.1e-06	2.07204
Fxa3Bg201222	176.607	1216.19	708.109	9.15e-06	2.58096
Fxa4Bg100721	3.63688	59.7803	26.1317	9.18e-06	3.70691
Fxa7Bg202141	31.5566	152.675	77.6495	9.21e-06	2.10266
Fxa6Dg101585	1118.98	486.411	737.409	9.22e-06	-1.13602
Fxa7Ag202009	110.177	1405.74	570.997	9.23e-06	3.3961
Fxa6Ag104079	536.352	3983.54	2016.06	9.54e-06	2.68351
Fxa7Ag203185	241.045	578.424	362.133	9.56e-06	1.19276
Fxa6Dg100874	496.272	126.836	237.795	9.62e-06	-1.83436
Fxa1Cg100780	2856.62	773.766	1427.27	9.62e-06	-1.75792
Fxa6Ag100971	6.56486	142.591	49.4156	9.63e-06	4.07537
Fxa3Cg102802	493.812	157.087	254.665	9.64e-06	-1.54499
Fxa6Bg101519	220.174	55.071	124.868	9.71e-06	-1.86929
Fxa2Bg203238	226.431	1171.27	610.886	9.76e-06	2.20477
Fxa4Ag102638	99714.5	12834.4	38149.1	9.77e-06	-2.73306
Fxa7Cg101334	22.0456	124.608	72.5104	9.82e-06	2.33194
Fxa4Bg101971	2306.47	915.707	1390.17	9.87e-06	-1.2496
Fxa7Dg102768	171.625	66.9867	117.237	9.89e-06	-1.2884
Fxa6Ag102266	83.2895	4.47023	30.5047	9.92e-06	-3.86648
Fxa5Dg201395	301.583	84.5524	185.705	9.92e-06	-1.70813
Fxa6Bg100300	1072.18	290.896	578.532	1e-05	-1.75724
Fxa6Ag104491	2552	303.199	1169.49	1e-05	-2.83947
Fxa1Bg200255	7.38884	109.575	37.0945	1.01e-05	3.59512
Fxa4Cg201245	331.263	102.548	208.274	1.01e-05	-1.57894
Fxa6Ag104847	20379.4	3158.6	9514.96	1.01e-05	-2.48961
Fxa5Dg200183	82.5407	848.643	386.254	1.01e-05	3.10706
Fxa2Dg202895	1.66966	78.4515	31.1295	1.02e-05	5.20706
Fxa7Bg201128	69.2719	11.2166	40.2212	1.02e-05	-2.42742
Fxa3Cg101182	1.72963	41.4642	17.5418	1.02e-05	4.17896
Fxa2Ag101652	0.688479	81.1046	22.4348	1.02e-05	6.2878
Fxa5Cg201812	1278.45	16.7191	460.163	1.03e-05	-5.73786
Fxa2Cg202680	54.2712	219.277	134.699	1.03e-05	1.86737
Fxa2Dg201743	6098.69	1688.41	3408.8	1.03e-05	-1.72877
Fxa4Cg200364	186.799	544.392	345.561	1.03e-05	1.45048
Fxa2Dg202491	1135.94	407.147	715.525	1.04e-05	-1.39111
Fxa4Dg101655	249.483	39.0316	102.183	1.04e-05	-2.48701
Fxa2Cg200838	285.867	1360.06	701.202	1.05e-05	2.09322
Fxa4Cg200239	59.1515	399.72	246.333	1.06e-05	2.55087
Fxa3Cg103485	15049.1	2559.1	6663.98	1.06e-05	-2.37266
Fxa3Bg201122	451.932	78.1121	238.114	1.06e-05	-2.34412
Fxa6Dg104159	5.87638	119.889	64.6383	1.06e-05	3.98537
Fxa1Ag100269	28.2393	153.86	71.692	1.07e-05	2.26908
Fxa4Bg103102	0.36855	69.7513	19.161	1.07e-05	6.83967
Fxa5Cg200108	1612.24	11717.8	6552.32	1.07e-05	2.65188
Fxa2Cg200587	349.508	35.1462	143.773	1.07e-05	-3.05713
Fxa6Ag101729	4.35356	154.135	60.1931	1.08e-05	4.7017
Fxa3Bg200695	832.676	233.633	456.663	1.08e-05	-1.71432
Fxa5Ag200725	311.413	112.603	194.434	1.08e-05	-1.37618
Fxa1Cg100638	4.00641	78.8731	35.3637	1.08e-05	3.95326
Fxa1Bg200744	330.245	21.7092	158.812	1.08e-05	-3.61597
Fxa5Dg200772	491.425	142.725	270.539	1.08e-05	-1.66606
Fxa4Dg100985	853.6	113.507	394.054	1.08e-05	-2.6913
Fxa4Bg101639	831.462	179.11	408.928	1.09e-05	-2.05663
Fxa1Cg100359	430.01	136.473	263.412	1.09e-05	-1.55093
Fxa3Cg101217	395.791	160.995	287.027	1.09e-05	-1.22043
Fxa4Ag100421	77.2656	445.133	242.215	1.09e-05	2.34519
Fxa6Cg104424	18.221	283.593	102.163	1.1e-05	3.65368
Fxa6Dg100241	2459.81	1039.19	1596.9	1.1e-05	-1.17399
Fxa1Ag100623	392.878	943.787	636.746	1.1e-05	1.19541
Fxa2Cg201612	201.467	36.3374	80.8651	1.1e-05	-2.28862
Fxa3Ag101075	131.883	26.0931	74.876	1.1e-05	-2.14839
Fxa2Ag101722	27.8585	171.293	92.0688	1.11e-05	2.42632
Fxa5Cg200493	3.76232	52.7556	18.0591	1.11e-05	3.46155
Fxa2Dg201509	3999.74	1043.5	1716.41	1.12e-05	-1.80742
Fxa2Bg200449	439.742	2640.02	1341.89	1.12e-05	2.40025
Fxa3Cg101993	47.6629	2.08382	17.9931	1.13e-05	-4.19552
Fxa1Bg201291	30.3991	374.397	161.344	1.13e-05	3.33435
Fxa1Bg200343	125.955	294.305	211.53	1.14e-05	1.15575
Fxa6Dg101666	4281.7	2072.43	2849.18	1.15e-05	-0.994358
Fxa5Ag203520	269.251	1611.93	908.71	1.15e-05	2.3922
Fxa1Dg201753	503.998	219.162	321.149	1.15e-05	-1.13667
Fxa3Ag102043	110.61	8.59816	42.2265	1.15e-05	-3.40424
Fxa3Dg200651	50.8525	265.27	138.855	1.16e-05	2.20765
Fxa5Ag200308	153.194	521.485	307.919	1.16e-05	1.65227
Fxa5Ag201000	409.921	2146.58	1187.3	1.17e-05	2.21719
Fxa2Ag102031	17361.1	5464.01	10131.8	1.17e-05	-1.56129
Fxa1Ag100270	1262.97	9189.24	4020.53	1.18e-05	2.65157
Fxa5Bg103514	200.662	437.55	336.125	1.18e-05	1.06488
Fxa7Dg102709	623.051	164.931	384.8	1.19e-05	-1.7828
Fxa7Bg202431	1204.01	71.0436	444.681	1.19e-05	-3.75186
Fxa4Ag103315	333.086	46.8713	187.31	1.19e-05	-2.61006
Fxa1Bg200239	1065.55	285.372	497.935	1.2e-05	-1.7741
Fxa2Dg202636	1598.76	668.53	1093.55	1.2e-05	-1.18751
Fxa5Bg100129	456.081	1048.99	740.998	1.2e-05	1.13541
Fxa2Ag100287	144.258	787.916	403.018	1.2e-05	2.27148
Fxa3Dg200468	657.452	101.718	290.041	1.21e-05	-2.4935
Fxa6Cg100758	396.662	147.229	265.022	1.23e-05	-1.34534
Fxa7Bg202957	701.855	181.848	422.776	1.23e-05	-1.8132
Fxa4Cg201792	402.198	129.02	223.738	1.23e-05	-1.53325
Fxa4Bg103095	278.205	714.185	448.57	1.24e-05	1.27981
Fxa4Bg103314	1576.35	718.297	1086.71	1.24e-05	-1.07339
Fxa3Cg102882	976.633	131.47	359.75	1.24e-05	-2.67233
Fxa5Cg200015	128.152	33.6927	76.5929	1.24e-05	-1.77387
Fxa2Ag100319	531.245	181.393	375.255	1.24e-05	-1.45246
Fxa6Ag103395	291.877	85.7866	172.425	1.25e-05	-1.65022
Fxa5Ag201012	86.1607	1644.19	720.715	1.27e-05	3.91828
Fxa2Dg200489	370.849	1271.33	832.51	1.27e-05	1.66403
Fxa2Cg201007	590.197	210.81	350.364	1.27e-05	-1.39285
Fxa4Cg200635	2888.1	853.369	1275.08	1.27e-05	-1.64116
Fxa4Bg103151	358.388	36.3488	142.513	1.28e-05	-3.04063
Fxa2Bg203026	4.40218	241.406	94.169	1.28e-05	5.27572
Fxa3Ag101111	5.86601	175.586	55.4324	1.29e-05	4.51181
Fxa5Ag201166	70.6871	271.898	187.065	1.29e-05	1.81333
Fxa5Bg103487	32.061	412.812	141.788	1.29e-05	3.40717
Fxa4Ag100603	290.886	82.3349	152.59	1.3e-05	-1.69397
Fxa6Ag101382	120.322	808.847	391.024	1.3e-05	2.54018
Fxa4Ag102989	216.996	42.5723	110.393	1.3e-05	-2.18627
Fxa5Dg200277	122.536	506.302	282.505	1.31e-05	1.90206
Fxa5Dg201080	35.7235	164.927	106.392	1.32e-05	2.05102
Fxa6Cg103125	260.43	49.9004	145.592	1.32e-05	-2.21283
Fxa6Dg102109	55.0184	8.585	28.0557	1.32e-05	-2.47528
Fxa3Bg202819	297.699	77.0808	191.19	1.32e-05	-1.80485
Fxa4Bg102148	6246.19	1305.93	2921.35	1.33e-05	-2.08395
Fxa7Bg200906	407.365	166.862	318.889	1.34e-05	-1.2152
Fxa1Bg200495	5.302	52.9634	31.1682	1.34e-05	3.02009
Fxa6Ag101861	1395.52	598.659	966.409	1.34e-05	-1.1515
Fxa5Bg101244	4346.98	677.39	2030.6	1.35e-05	-2.47678
Fxa6Cg100085	461.571	7763.05	3948.64	1.35e-05	3.75566
Fxa1Ag101898	32.0684	236.05	141.763	1.36e-05	2.65246
Fxa6Dg102752	219.584	3572.32	1755.58	1.36e-05	3.70726
Fxa7Bg203160	903.743	387.226	674.74	1.36e-05	-1.15235
Fxa3Bg201187	61.5884	537.813	266.741	1.36e-05	2.88384
Fxa7Ag200487	354.524	163.967	239.45	1.36e-05	-1.04868
Fxa7Cg102603	46.6312	114.845	75.7438	1.37e-05	1.22617
Fxa5Ag200561	444.18	2862.64	1396.94	1.37e-05	2.49077
Fxa5Cg201061	615.622	222.849	367.633	1.37e-05	-1.37336
Fxa2Cg201882	1576.18	483.512	1074.76	1.37e-05	-1.59159
Fxa5Dg201253	895.908	156.208	470.349	1.38e-05	-2.32943
Fxa3Bg201809	0	38.4433	15.9971	1.38e-05	7.75393
Fxa6Ag104103	55.7892	2.26301	19.2675	1.39e-05	-4.2262
Fxa1Ag101897	37.0891	256.342	136.022	1.4e-05	2.5777
Fxa2Cg200694	319.666	65.0985	158.363	1.4e-05	-2.12309
Fxa3Ag100244	672.519	2529.22	1589.67	1.4e-05	1.78069
Fxa7Bg202684	381.046	991.681	679.361	1.41e-05	1.29704
Fxa4Dg100830	1954.06	278.049	936.541	1.42e-05	-2.59577
Fxa6Bg104618	782.841	266.702	503.711	1.42e-05	-1.4517
Fxa5Ag201809	0.639858	97.8004	38.4092	1.42e-05	6.53583
Fxa1Cg101132	1.84275	130.215	39.5488	1.42e-05	5.63287
Fxa4Cg202246	111.926	563.556	307.503	1.43e-05	2.16198
Fxa2Cg202322	4498.51	2233.99	3381.76	1.43e-05	-0.960717
Fxa2Dg201894	322.702	94.4948	240.081	1.43e-05	-1.64264
Fxa6Dg100372	0	47.7454	14.2317	1.43e-05	8.11483
Fxa7Dg102812	2586.61	754.144	1128.73	1.45e-05	-1.65674
Fxa6Bg103481	2832.62	17449.3	8674.4	1.45e-05	2.42727
Fxa5Cg200313	7.81281	149.117	65.2168	1.45e-05	3.8862
Fxa4Dg102531	21.3516	252.455	124.278	1.45e-05	3.26545
Fxa2Bg200484	197.515	9.59981	56.2849	1.46e-05	-3.99085
Fxa4Ag103049	304.89	969.694	631.56	1.46e-05	1.55861
Fxa5Dg201506	610.248	1906.23	1333.76	1.47e-05	1.5386
Fxa7Dg102026	55.75	412.875	190.031	1.47e-05	2.66851
Fxa1Ag101340	1060.9	387.758	686.348	1.47e-05	-1.36125
Fxa1Ag101723	154.946	26.7666	76.3863	1.49e-05	-2.36016
Fxa4Dg101119	1.05703	90.9114	34.3391	1.49e-05	5.8578
Fxa6Bg104387	1531.81	632.784	1079.07	1.49e-05	-1.1996
Fxa6Ag102948	104.382	1728.12	791.502	1.49e-05	3.72752
Fxa4Cg202127	4.19635	108.067	41.9548	1.49e-05	4.2852
Fxa6Cg100042	89.9503	21.47	59.6458	1.49e-05	-1.90937
Fxa7Ag202604	115.573	442.7	282.603	1.49e-05	1.80275
Fxa4Ag103128	699.776	4573.26	2231.22	1.53e-05	2.50531
Fxa6Ag101112	7.54702	177.963	124.735	1.55e-05	4.17968
Fxa6Cg100053	9261.2	3380.34	5587.2	1.55e-05	-1.36151
Fxa1Dg202644	209.614	515.761	346.808	1.56e-05	1.22105
Fxa4Ag102246	279.531	971.213	536.246	1.57e-05	1.67467
Fxa3Bg201279	307.726	1436.13	809.095	1.57e-05	2.05996
Fxa4Cg202225	659.481	2467.98	1489.56	1.57e-05	1.77076
Fxa3Dg200910	8580.58	2030.76	4438	1.57e-05	-1.92805
Fxa3Ag101319	0	24.0881	10.4497	1.58e-05	7.04037
Fxa6Cg100256	39.0304	396.373	202.85	1.58e-05	3.07248
Fxa4Dg100490	396.613	92.8048	213.165	1.6e-05	-1.94353
Fxa5Bg101883	6304.28	2571.66	3936.27	1.62e-05	-1.21804
Fxa7Ag201086	407.827	117.424	243.994	1.62e-05	-1.67063
Fxa4Cg201956	12.7019	159.818	62.4852	1.63e-05	3.37181
Fxa6Bg104343	55.2329	431.047	245.405	1.63e-05	2.73214
Fxa6Ag100277	2033.35	847.434	1377.78	1.64e-05	-1.18977
Fxa5Bg101681	6.51041	42.7578	19.7926	1.65e-05	2.53931
Fxa5Ag201981	2354.16	481.068	2333.68	1.66e-05	-2.10583
Fxa4Dg100793	70.3043	226.196	149.981	1.68e-05	1.56605
Fxa3Bg200691	75.6086	382.32	237.98	1.68e-05	2.1718
Fxa7Bg202606	2.48812	35.255	18.6747	1.68e-05	3.6271
Fxa4Ag102887	318.267	116.718	194.984	1.7e-05	-1.34977
Fxa6Cg100855	96.3138	357.745	191.759	1.71e-05	1.75977
Fxa5Dg203153	57.2614	15.1992	39.0532	1.71e-05	-1.79467
Fxa6Bg102485	1525.83	121.428	618.496	1.71e-05	-3.35084
Fxa5Bg102903	64.4156	1130.68	644.18	1.72e-05	3.79549
Fxa4Dg102060	139.282	648.667	362.337	1.72e-05	2.05539
Fxa1Ag102134	177.281	14.2111	125.286	1.73e-05	-3.32587
Fxa5Cg200151	330.67	3558.7	1443.41	1.74e-05	3.15765
Fxa4Cg201880	136.175	15.3137	57.5386	1.74e-05	-2.90332
Fxa5Cg203216	125.082	329.364	214.211	1.75e-05	1.31362
Fxa6Dg101657	208.721	53.7995	150.298	1.76e-05	-1.81297
Fxa4Dg100156	337.25	80.9179	215.057	1.76e-05	-1.90133
Fxa5Ag202112	366.538	2482.13	1199.31	1.77e-05	2.54727
Fxa3Cg101176	433.074	2029.63	1127.33	1.78e-05	2.06109
Fxa6Dg103209	374.804	1843.52	1108.96	1.78e-05	2.12773
Fxa6Ag101201	2168.76	252.706	850.236	1.78e-05	-2.85033
Fxa5Bg101483	307.481	90.7542	201.897	1.81e-05	-1.62976
Fxa3Dg200787	653.272	2594.95	1497.47	1.82e-05	1.85013
Fxa5Bg100377	281.585	40.6077	103.595	1.82e-05	-2.57196
Fxa3Ag101229	1184.41	275.088	611.215	1.82e-05	-1.95012
Fxa1Cg101866	880.372	369.374	592.752	1.82e-05	-1.18121
Fxa5Dg200854	2322.32	7128.54	3938.38	1.82e-05	1.51463
Fxa5Bg103591	477.235	65.5124	208.386	1.87e-05	-2.63722
Fxa4Cg201612	25.8627	604.293	401.935	1.87e-05	4.16658
Fxa2Ag101668	518.498	219.978	321.978	1.88e-05	-1.16792
Fxa6Ag100298	1848.26	753.06	1170.75	1.88e-05	-1.21837
Fxa3Ag103303	811.32	117.159	324.757	1.88e-05	-2.57136
Fxa3Cg102647	1734.56	801.976	1225.57	1.88e-05	-1.05245
Fxa2Cg200332	250.796	54.1978	134.102	1.9e-05	-2.03683
Fxa1Ag101338	522.641	121.14	371.038	1.91e-05	-1.95005
Fxa4Dg102435	378.935	1260.67	766.489	1.91e-05	1.61491
Fxa5Ag203449	134.594	32.6965	65.2248	1.91e-05	-1.91179
Fxa4Dg100607	172.357	39.1569	88.2203	1.91e-05	-1.97044
Fxa1Bg200953	95.0167	10.3826	46.754	1.94e-05	-2.90868
Fxa3Bg201194	4.13087	58.8561	32.42	1.95e-05	3.47837
Fxa6Dg102311	9.72007	84.239	56.2256	1.98e-05	2.83561
Fxa7Ag200364	993.894	47.8941	360.22	1.98e-05	-4.00387
Fxa6Dg101720	78.1476	789.73	377.348	1.98e-05	3.06961
Fxa3Cg103065	1266.55	430.297	635.722	1.98e-05	-1.45449
Fxa2Bg200376	34.0794	719.335	241.223	1.98e-05	4.0475
Fxa6Ag103745	6700.25	2711.53	4249.86	1.99e-05	-1.23315
Fxa1Cg100122	2.80254	70.5919	28.061	2.01e-05	4.2372
Fxa7Ag203124	2.43399	48.7409	23.7105	2.04e-05	3.92295
Fxa4Dg100188	1105.5	9417.97	4267.67	2.04e-05	2.84785
Fxa2Bg203246	359.676	1513.68	778.62	2.04e-05	1.91991
Fxa2Ag101467	979.078	253.955	554.685	2.04e-05	-1.80801
Fxa6Cg104092	166.789	782.178	416.46	2.05e-05	2.06261
Fxa3Ag101246	277.536	1790.39	927.5	2.05e-05	2.48164
Fxa7Bg202455	249.166	1753.09	831.786	2.05e-05	2.59655
Fxa3Dg200017	109.054	473.566	254.612	2.06e-05	1.96104
Fxa7Dg102512	142.037	10.0533	52.5257	2.06e-05	-3.54327
Fxa4Bg100291	76.5978	435.01	235.506	2.06e-05	2.31334
Fxa3Cg103817	45.9103	240.242	114.462	2.06e-05	2.20677
Fxa2Dg202038	221.71	52.1853	109.408	2.06e-05	-1.93876
Fxa1Dg200690	649.079	75.7314	239.568	2.07e-05	-2.84946
Fxa1Dg201569	607.595	102.547	296.466	2.07e-05	-2.36767
Fxa2Bg202862	1223.38	357.716	872.535	2.09e-05	-1.64777
Fxa4Cg202963	943.47	324.877	578.96	2.09e-05	-1.43698
Fxa6Dg103357	310.169	108.049	200.405	2.11e-05	-1.4135
Fxa3Ag100742	926.433	222.473	450.794	2.11e-05	-1.90903
Fxa6Bg100883	5.925	127.297	43.6351	2.11e-05	4.03642
Fxa3Ag100172	58.5499	6.322	25.3018	2.11e-05	-2.95311
Fxa6Cg103345	39.3224	360.038	296.185	2.11e-05	2.93651
Fxa6Bg104273	6.19631	49.78	41.6974	2.11e-05	2.71053
Fxa4Cg201410	1642.94	257.04	749.069	2.12e-05	-2.46086
Fxa3Ag101095	15564.5	4072.22	8091.35	2.14e-05	-1.79261
Fxa5Ag201743	218.378	79.2069	119.511	2.14e-05	-1.36078
Fxa1Cg102297	24.0906	136.35	63.8789	2.14e-05	2.30633
Fxa5Bg102064	240.915	1367.37	736.856	2.14e-05	2.31223
Fxa5Bg100577	534.697	1239.38	826.252	2.14e-05	1.14372
Fxa5Ag201590	113.829	493.225	259.701	2.15e-05	1.95799
Fxa4Dg100677	202.642	73.7673	141.54	2.15e-05	-1.36137
Fxa1Cg100463	1021.47	182.429	499.056	2.16e-05	-2.29248
Fxa4Ag103305	795.475	81.1919	400.953	2.16e-05	-3.02145
Fxa1Cg101419	228.504	1555.75	784.905	2.16e-05	2.54941
Fxa1Dg200362	264.654	1254.1	796.493	2.17e-05	2.07654
Fxa3Bg203720	440.419	69.489	215.073	2.17e-05	-2.45283
Fxa4Dg100364	257.796	1114.8	647.794	2.18e-05	1.95422
Fxa6Ag102766	428.108	2185.08	1109.57	2.18e-05	2.17472
Fxa6Cg104144	650.713	104	313.455	2.18e-05	-2.43452
Fxa3Dg201402	2721.87	1139.93	1671.44	2.19e-05	-1.18161
Fxa2Bg203106	938.729	8481.31	3987.45	2.19e-05	2.92358
Fxa2Bg200210	0.319929	76.0569	75.6751	2.2e-05	6.89566
Fxa5Bg100749	84.1958	18.2069	55.6542	2.22e-05	-2.02709
Fxa6Cg103257	1897.26	270.112	794.982	2.22e-05	-2.58457
Fxa7Ag201805	242.698	17.0318	83.9322	2.24e-05	-3.51926
Fxa4Bg100351	863.697	3210.27	2162.5	2.24e-05	1.7549
Fxa6Cg103358	733.998	332.604	531.108	2.25e-05	-1.07562
Fxa7Cg102941	154.732	57.2359	109.426	2.25e-05	-1.3371
Fxa7Cg102500	25.1658	88.2454	55.002	2.26e-05	1.65929
Fxa3Dg202643	3115.82	1456.57	2168.38	2.27e-05	-1.03736
Fxa5Dg202719	174.559	941.929	589.424	2.28e-05	2.24268
Fxa7Ag201963	47.6577	167.447	99.5917	2.28e-05	1.67853
Fxa6Cg102654	7.28025	96.0884	47.3622	2.29e-05	3.42597
Fxa4Ag102220	10297.1	2408.95	5024.33	2.3e-05	-1.93816
Fxa7Cg101076	947.01	96.7225	423.093	2.31e-05	-3.0185
Fxa4Cg200299	1618.9	611.581	951.807	2.32e-05	-1.3148
Fxa3Ag100107	218.065	468.021	330.033	2.32e-05	1.04345
Fxa4Cg202316	7346.5	572.796	2431.68	2.33e-05	-3.3665
Fxa1Cg100147	335.162	114.153	214.703	2.33e-05	-1.44992
Fxa6Ag101515	723.973	43.8854	247.011	2.34e-05	-3.69687
Fxa6Dg100978	760.771	146.227	380.276	2.34e-05	-2.1892
Fxa2Bg201121	304.862	761.18	503.891	2.34e-05	1.2384
Fxa5Cg200535	2091.51	1074.59	1519.33	2.35e-05	-0.914028
Fxa3Cg101683	14.4273	113.083	58.9062	2.35e-05	2.7066
Fxa6Bg103591	15.6133	109.947	54.9059	2.36e-05	2.56445
Fxa4Cg202078	8578.73	1841.45	4209.5	2.36e-05	-2.04805
Fxa1Ag100794	1675.65	166.902	612.237	2.37e-05	-3.05013
Fxa3Ag102356	3435.59	1095.66	2173.87	2.38e-05	-1.53265
Fxa1Dg200621	2262.01	290.561	798.805	2.38e-05	-2.71806
Fxa4Dg100355	400.481	969.071	842.465	2.38e-05	1.1978
Fxa3Cg103387	2.2395	135.09	57.0196	2.38e-05	5.33108
Fxa4Cg200872	308.864	114.131	205.019	2.39e-05	-1.34053
Fxa5Bg103288	1288.81	405.782	845.145	2.39e-05	-1.54756
Fxa2Bg202472	0	68.4595	22.2659	2.39e-05	8.57321
Fxa6Ag100491	0	78.9915	23.36	2.42e-05	8.8079
Fxa2Ag100147	1703.05	851.952	1732.5	2.42e-05	-0.947692
Fxa4Dg101673	1542.79	646.943	974.544	2.42e-05	-1.17951
Fxa4Cg202829	5.6819	64.4608	30.4571	2.46e-05	3.15456
Fxa5Bg100979	66.4668	965.703	459.333	2.46e-05	3.53699
Fxa7Dg101428	6.3908	290.012	100.215	2.49e-05	5.01627
Fxa2Cg202640	389.332	1602.88	903.332	2.51e-05	1.8879
Fxa4Cg200551	2723.6	575.71	1119.76	2.51e-05	-2.06849
Fxa3Cg101714	16865	2696.97	7469.82	2.52e-05	-2.42693
Fxa1Cg101801	18.4146	102.862	57.4692	2.53e-05	2.27917
Fxa7Bg201546	57.2504	473.939	220.604	2.53e-05	2.80108
Fxa3Ag102867	4760.56	366.522	1961.98	2.54e-05	-3.38312
Fxa5Bg100965	311.14	2430.2	1296.1	2.55e-05	2.72997
Fxa5Cg200772	1128.92	441.536	705.531	2.58e-05	-1.26958
Fxa3Ag101782	388.993	88.0536	233.686	2.58e-05	-1.98615
Fxa4Bg101209	502.035	121.831	245.385	2.58e-05	-1.88689
Fxa2Dg201723	1.27972	115.376	41.5592	2.59e-05	5.83707
Fxa6Ag100410	690.071	2531.3	1410.6	2.6e-05	1.73914
Fxa5Bg100631	404.436	126.759	215.267	2.6e-05	-1.56108
Fxa5Ag200644	485.218	123.348	247.816	2.61e-05	-1.82938
Fxa6Bg100979	545.734	165.173	277.139	2.64e-05	-1.6014
Fxa7Dg101824	537.368	71.7079	288.699	2.64e-05	-2.66928
Fxa4Cg201873	163.366	22.3143	103.482	2.67e-05	-2.62831
Fxa1Cg101208	235.6	513.552	425.819	2.68e-05	1.061
Fxa3Dg201768	530.909	65.894	213.544	2.68e-05	-2.76087
Fxa3Cg101302	3.09524	64.9796	25.7069	2.68e-05	4.04469
Fxa7Cg102731	179.4	11.6542	69.0707	2.69e-05	-3.61021
Fxa1Cg101670	77.4928	377.981	179.656	2.7e-05	2.11737
Fxa7Ag202082	471.652	120.57	236.933	2.72e-05	-1.81733
Fxa1Ag101343	544.437	1083.52	799.813	2.76e-05	0.943348
Fxa2Ag101303	1651.28	6246.88	3924.88	2.76e-05	1.77793
Fxa1Cg100230	66.5938	469.021	227.204	2.78e-05	2.58347
Fxa2Dg200629	1.27972	105.369	33.3036	2.79e-05	5.72438
Fxa6Ag103227	147.226	289.535	215.58	2.79e-05	0.923522
Fxa5Dg201098	101.993	326.142	206.293	2.8e-05	1.55547
Fxa5Cg201217	1009.79	280.111	573.596	2.81e-05	-1.71333
Fxa3Bg201081	184.031	950.329	538.403	2.83e-05	2.18247
Fxa7Dg100710	475.72	3088.66	1510.56	2.83e-05	2.48342
Fxa2Cg202663	607.962	62.3784	242.614	2.87e-05	-3.00632
Fxa1Ag101373	1458.33	3924.68	2899.08	2.87e-05	1.33664
Fxa7Bg201339	594.22	75.9084	246.028	2.91e-05	-2.71915
Fxa6Cg103533	162.067	75.2065	113.136	2.92e-05	-1.03559
Fxa4Bg102345	381.219	1534.07	872.9	2.92e-05	1.85487
Fxa7Cg102507	117.169	16.2859	58.5718	2.94e-05	-2.61679
Fxa1Bg201638	6740.13	2905.66	4834.53	2.95e-05	-1.14126
Fxa3Ag101087	31.3666	144.276	79.4846	3e-05	2.01665
Fxa5Cg200771	252.806	4679.77	2216.72	3e-05	3.85103
Fxa6Cg103704	214.114	38.8986	107.363	3.03e-05	-2.25744
Fxa4Cg203099	312.807	1178.15	664.275	3.06e-05	1.77107
Fxa5Ag200781	257.821	54.9801	199.328	3.07e-05	-2.05456
Fxa4Bg102506	223.737	23.7566	89.982	3.09e-05	-2.95243
Fxa3Dg203658	70.2191	268.573	193.078	3.09e-05	1.78786
Fxa7Cg100742	73.3253	1090.75	463.6	3.09e-05	3.56502
Fxa6Dg104439	20096.8	7724.99	12045.9	3.1e-05	-1.28979
Fxa5Bg101257	2500.5	8044.16	4763.25	3.11e-05	1.5641
Fxa1Bg201243	2413.82	774.76	1469.6	3.13e-05	-1.52304
Fxa3Bg201022	188.224	1527.08	706.007	3.13e-05	2.76956
Fxa7Cg102929	976.595	3191.9	1906.21	3.16e-05	1.58359
Fxa6Bg101112	536.801	222.797	414.46	3.18e-05	-1.18951
Fxa2Ag103912	1660.41	7542.98	3767.92	3.19e-05	2.01127
Fxa7Ag201942	26.6614	134.188	63.7116	3.19e-05	2.14297
Fxa7Cg100081	7.03617	50.1517	21.5944	3.19e-05	2.6027
Fxa4Bg101377	11.427	56.1594	32.3822	3.2e-05	2.10747
Fxa7Cg101059	0.319929	48.4666	27.5597	3.2e-05	6.2851
Fxa6Dg104151	383.255	138.231	276.754	3.23e-05	-1.37141
Fxa5Ag200969	47.7193	398.927	182.464	3.24e-05	2.80364
Fxa6Cg102405	538.465	41.2184	234.024	3.27e-05	-3.38507
Fxa3Dg201985	148.472	42.38	83.3795	3.28e-05	-1.67774
Fxa6Ag101947	501.721	225.27	368.054	3.28e-05	-1.08766
Fxa7Ag200351	968.785	4915.63	3089.43	3.29e-05	2.15832
Fxa1Dg201198	123.4	349.443	230.683	3.35e-05	1.40645
Fxa5Dg200549	1245.78	68.854	494.366	3.35e-05	-3.80452
Fxa2Dg202206	286.032	142.042	198.299	3.35e-05	-0.953177
Fxa6Dg100952	212.035	1992.17	896.467	3.36e-05	2.96228
Fxa1Ag100068	48.9436	394.909	171.996	3.38e-05	2.76478
Fxa2Dg201568	728.393	1821.94	1204.03	3.39e-05	1.24015
Fxa1Ag101532	24.0825	415.38	202.563	3.4e-05	3.74892
Fxa2Ag103685	104.595	21.57	56.4054	3.4e-05	-2.07414
Fxa6Cg102625	445.05	56.642	149.866	3.41e-05	-2.72666
Fxa6Ag101421	1911.19	13115.7	6658.62	3.44e-05	2.54964
Fxa4Cg200708	1.37696	41.8715	16.753	3.44e-05	4.42399
Fxa6Cg100882	202.727	692.483	415.407	3.44e-05	1.64542
Fxa1Ag102721	1715.72	7121.51	3725.04	3.45e-05	1.89158
Fxa2Dg200064	0.688479	49.7433	19.6443	3.45e-05	5.57536
Fxa4Cg202590	0	132.714	60.0782	3.45e-05	9.42807
Fxa6Cg101707	3478.31	1556.84	2320.79	3.45e-05	-1.09137
Fxa4Ag102490	51.8522	4.78596	24.9906	3.46e-05	-3.11031
Fxa6Ag100045	833.974	361.628	562.98	3.46e-05	-1.13472
Fxa4Ag101499	0.36855	60.3731	15.8352	3.47e-05	6.61211
Fxa7Ag200071	678.677	271.377	425.762	3.48e-05	-1.24015
Fxa4Ag101983	148.881	12.3138	67.8582	3.49e-05	-3.2608
Fxa6Cg102622	91.6375	354.007	211.261	3.5e-05	1.80191
Fxa1Bg200173	396.137	54.3569	158.18	3.5e-05	-2.62805
Fxa3Cg100677	1.69689	37.8407	18.9365	3.51e-05	4.00223
Fxa6Dg101297	2588.25	899.416	1663.14	3.51e-05	-1.42013
Fxa2Dg200720	353.811	83.0329	195.413	3.52e-05	-1.93191
Fxa7Dg100897	561.575	161.35	334.846	3.53e-05	-1.66376
Fxa5Ag203013	239.414	111.588	173.824	3.54e-05	-1.03841
Fxa7Bg201453	192.342	1640.96	796.756	3.54e-05	2.83412
Fxa3Ag100745	293.994	26.9897	106.598	3.57e-05	-3.15344
Fxa6Dg100626	5402.83	308.625	1877.46	3.57e-05	-3.75022
Fxa2Dg202173	149.027	43.389	77.2082	3.57e-05	-1.64677
Fxa7Bg202288	92.5143	22.1851	50.9676	3.57e-05	-1.88629
Fxa1Dg200406	121.546	833.251	466.192	3.58e-05	2.54678
Fxa6Ag100056	16844.6	5965.73	9871.31	3.59e-05	-1.39669
Fxa2Dg201246	48.8334	688.545	318.331	3.65e-05	3.49097
Fxa6Dg100784	2.06544	54.7591	17.4202	3.67e-05	4.26873
Fxa4Cg200613	2313.22	875.905	1377.8	3.68e-05	-1.30835
Fxa4Ag100367	390.245	1073.19	911.288	3.69e-05	1.35902
Fxa6Dg100363	1971.98	771.564	1218.68	3.69e-05	-1.26688
Fxa6Cg103334	13441.8	4971.1	8014.45	3.71e-05	-1.33845
Fxa2Dg203048	856.615	214.188	479.344	3.72e-05	-1.84592
Fxa3Ag100492	259.916	790.191	510.684	3.74e-05	1.49167
Fxa6Bg100290	59.2731	233.753	124.557	3.74e-05	1.83154
Fxa6Ag103593	712.046	36.2255	245.701	3.75e-05	-3.90838
Fxa1Cg100289	1.64827	157.869	41.5326	3.76e-05	5.94294
Fxa5Cg200503	176.984	29.2661	85.234	3.77e-05	-2.38416
Fxa6Cg104423	0.818461	68.0747	22.7555	3.77e-05	5.91175
Fxa4Cg201608	861.125	3533.39	2196.99	3.77e-05	1.87708
Fxa7Bg202775	3.30658	50.1494	27.4197	3.79e-05	3.66287
Fxa7Dg102309	2492.18	421.852	1047.4	3.8e-05	-2.35017
Fxa6Bg102862	31.3197	199.051	94.6004	3.81e-05	2.44615
Fxa7Dg102535	166.444	700.247	449.955	3.82e-05	1.91088
Fxa7Cg101898	131.228	1371.29	591.019	3.83e-05	3.09478
Fxa7Ag200874	1849.08	538.24	962.161	3.85e-05	-1.64721
Fxa1Ag100556	85.1873	20.6327	44.6354	3.85e-05	-1.8895
Fxa1Dg200032	138.266	54.8819	106.219	3.85e-05	-1.24162
Fxa1Ag101660	146.647	986.495	440.366	3.85e-05	2.52309
Fxa6Ag101328	595.385	251.225	342.341	3.86e-05	-1.16902
Fxa6Cg100803	0.36855	65.6997	22.2717	3.88e-05	6.65507
Fxa4Ag103306	1671.74	201.727	898.392	3.88e-05	-2.79157
Fxa1Ag102577	8.71264	65.7491	28.1201	3.89e-05	2.64257
Fxa1Dg201122	964.575	268.56	486.454	3.9e-05	-1.70665
Fxa1Dg202059	28.8014	167.967	79.8345	3.9e-05	2.33214
Fxa5Bg102069	7735.59	3158.59	4917.16	3.9e-05	-1.21033
Fxa5Cg200689	358.197	126.499	193.731	3.9e-05	-1.39674
Fxa6Ag100747	554.781	146.65	287.729	3.93e-05	-1.77133
Fxa4Bg102382	7986.06	1702.69	3769.99	3.96e-05	-2.0505
Fxa5Bg100757	445.286	127.059	245.322	3.98e-05	-1.6694
Fxa3Bg201842	209.71	20.6136	79.2385	3.99e-05	-3.05439
Fxa6Cg103672	5.925	41.3978	24.8394	4.02e-05	2.52088
Fxa1Cg103046	19.1795	149.307	53.054	4.08e-05	2.72382
Fxa2Ag101642	1509.2	558.49	893.065	4.1e-05	-1.33694
Fxa3Cg102759	243.836	686.766	453.516	4.11e-05	1.38976
Fxa2Ag101657	122.09	1058.71	529.434	4.11e-05	2.8583
Fxa7Bg201185	351.778	29.8945	135.207	4.12e-05	-3.24241
Fxa5Cg201336	324.572	963.973	667.555	4.15e-05	1.45407
Fxa5Bg100874	130.312	355.329	216.207	4.18e-05	1.34853
Fxa4Ag101280	106.646	30.513	57.0792	4.2e-05	-1.67
Fxa2Cg203034	59.794	4.88146	29.154	4.2e-05	-3.25135
Fxa3Bg201586	1193.11	561.654	800.942	4.21e-05	-1.02497
Fxa2Bg202887	324.513	105.297	194.059	4.22e-05	-1.50047
Fxa7Dg102898	451.983	3057.4	1778.23	4.22e-05	2.5276
Fxa4Bg100048	247.874	76.1024	180.521	4.23e-05	-1.57604
Fxa1Ag100131	7.43746	80.5413	33.8144	4.23e-05	3.14679
Fxa3Cg101113	4.1795	51.169	20.2572	4.24e-05	3.25312
Fxa3Ag102856	1358.9	3098.36	2214.13	4.26e-05	1.11923
Fxa6Ag104957	1.32834	94.7605	28.1582	4.26e-05	5.53161
Fxa2Bg200868	126.88	37.6843	70.6912	4.26e-05	-1.6043
Fxa6Bg102361	145.706	402.3	286.346	4.27e-05	1.36793
Fxa3Bg200138	717.134	57.0302	514.001	4.28e-05	-3.32382
Fxa2Ag103943	71.0229	274.909	168.927	4.31e-05	1.79624
Fxa2Cg201586	4.81935	84.775	37.8865	4.33e-05	3.73713
Fxa6Ag102694	150.794	484.519	300.96	4.33e-05	1.56162
Fxa5Bg103309	3506.18	683.65	1325.25	4.33e-05	-2.16369
Fxa3Ag101437	64.4727	256.616	139.432	4.33e-05	1.82868
Fxa4Ag101323	6.27313	76.2418	36.1513	4.38e-05	3.23644
Fxa6Ag102751	609.24	256.131	377.447	4.38e-05	-1.16977
Fxa3Dg203387	2206.47	708.819	1338.53	4.46e-05	-1.52108
Fxa4Cg201784	114.108	606.947	316.937	4.47e-05	2.21326
Fxa5Ag201680	135.675	10.2533	51.5668	4.47e-05	-3.38168
Fxa7Bg201534	160.251	35.8611	82.9235	4.47e-05	-2.00147
Fxa4Cg202039	5.65467	110.634	38.3201	4.47e-05	3.89244
Fxa3Bg201642	1090.59	205.816	547.492	4.51e-05	-2.20362
Fxa6Ag101565	415.501	152.241	278.552	4.51e-05	-1.34602
Fxa7Dg101322	453.9	248.034	315.925	4.53e-05	-0.834181
Fxa3Dg201730	111.796	1078.66	569.236	4.54e-05	2.99174
Fxa6Bg104363	569.132	192.454	379.303	4.57e-05	-1.44704
Fxa5Bg101048	325.638	151.101	225.703	4.59e-05	-1.04423
Fxa6Ag101338	338.319	850.039	621.618	4.6e-05	1.24151
Fxa1Dg200870	209.36	657.24	437.437	4.6e-05	1.52887
Fxa3Cg103170	1358.7	540.535	833.241	4.6e-05	-1.24259
Fxa1Dg201790	257.461	42.7487	120.863	4.64e-05	-2.3711
Fxa7Ag201806	5827.03	2492.78	4126.27	4.64e-05	-1.16521
Fxa7Bg202989	673.971	242.201	402.199	4.65e-05	-1.37375
Fxa7Bg200846	48.143	1131.51	423.219	4.65e-05	4.14693
Fxa4Bg101840	1324.32	17781.6	9439.41	4.66e-05	3.41828
Fxa3Bg203459	7.23163	239.847	126.584	4.68e-05	4.58926
Fxa4Ag103016	506.041	51.6454	202.419	4.69e-05	-2.99512
Fxa1Bg201718	560.284	29.1264	182.552	4.73e-05	-3.87271
Fxa6Bg103423	101.87	461.201	234.737	4.73e-05	1.99776
Fxa5Ag200670	465.993	118.846	276.327	4.73e-05	-1.81605
Fxa5Cg200297	44.3223	209.32	120.865	4.73e-05	2.0466
Fxa6Ag101361	2111.74	310.795	778.597	4.73e-05	-2.52401
Fxa3Dg203548	137.217	38.9675	90.0016	4.74e-05	-1.66719
Fxa4Dg102472	104.484	23.0692	58.9734	4.76e-05	-1.98387
Fxa3Bg202050	174.307	59.5602	98.8288	4.76e-05	-1.44636
Fxa1Bg200796	3.85957	386.044	188.25	4.81e-05	5.99049
Fxa1Bg201540	53.314	418.172	159.374	4.81e-05	2.72074
Fxa5Cg200312	0.319929	36.0332	17.1274	4.82e-05	5.87133
Fxa6Ag105088	2.01682	71.3131	29.2748	4.83e-05	4.61274
Fxa7Dg102152	477.057	1112.12	746.071	4.83e-05	1.14401
Fxa1Dg201254	5.28515	68.3605	32.7657	4.83e-05	3.34034
Fxa2Cg203383	806.664	407.247	598.981	4.86e-05	-0.933592
Fxa5Bg101747	1408.1	505.205	813.483	4.87e-05	-1.37574
Fxa6Ag104772	84.5896	450.802	230.869	4.87e-05	2.21118
Fxa7Cg102821	412.021	1415.44	885.236	4.88e-05	1.64547
Fxa4Bg102872	347.762	158.127	253.795	4.88e-05	-1.06408
Fxa3Bg203142	543.056	192.632	349.572	4.9e-05	-1.38894
Fxa5Dg200451	241.082	927.009	487.059	4.91e-05	1.78722
Fxa3Cg100067	1360.51	2890.78	1970.77	4.91e-05	1.02249
Fxa7Bg202021	585.274	238.112	396.248	4.91e-05	-1.21464
Fxa6Dg102900	13.7829	150.31	57.4228	4.92e-05	3.12116
Fxa7Cg100781	314.785	152.251	255.037	4.94e-05	-0.990375
Fxa6Ag100780	97.0134	5.23824	33.5665	4.97e-05	-3.81396
Fxa2Bg202525	197.966	6.70376	81.7684	5.02e-05	-4.43328
Fxa4Ag101875	1402.42	452.021	721.769	5.03e-05	-1.51368
Fxa1Ag102251	58.172	4045.59	1396.88	5.04e-05	5.54915
Fxa7Cg100845	87.2842	492.043	234.504	5.04e-05	2.28286
Fxa3Cg100287	93.0854	385.315	234.238	5.04e-05	1.88762
Fxa6Ag101284	1.10565	43.9755	17.8878	5.08e-05	4.83376
Fxa7Cg101271	1297.5	488.428	782.76	5.08e-05	-1.31161
Fxa6Dg100053	15237.4	4862.18	8778.51	5.08e-05	-1.52502
Fxa5Cg201343	2.54809	63.6375	28.5584	5.12e-05	4.20989
Fxa4Dg102503	4.71628	38.9451	14.8933	5.12e-05	2.82293
Fxa3Dg203061	2740.18	1016.16	1678.64	5.12e-05	-1.33005
Fxa4Ag101151	3040.8	421.085	1432.77	5.12e-05	-2.60136
Fxa5Bg101249	503.413	921.79	654.825	5.14e-05	0.830191
Fxa7Cg102349	287.845	86.8075	171.674	5.16e-05	-1.59788
Fxa7Dg100080	3107.9	1481.43	2367.87	5.16e-05	-1.00737
Fxa4Dg100151	338.384	105.374	238.335	5.18e-05	-1.55925
Fxa4Bg100741	117.525	769.174	403.036	5.19e-05	2.47806
Fxa7Bg201740	1784.47	317.059	876.699	5.2e-05	-2.28018
Fxa3Bg203706	530.314	8769.62	2612.56	5.21e-05	3.68892
Fxa4Cg202203	802.692	2210.25	1356.72	5.22e-05	1.36212
Fxa3Ag103547	5236.56	1575.13	3099.85	5.23e-05	-1.60162
Fxa5Cg203220	316.556	815.881	698.766	5.23e-05	1.27284
Fxa4Cg202109	390.177	3439.74	1646.78	5.25e-05	2.86685
Fxa4Cg202337	691.834	96.7928	317.063	5.25e-05	-2.58805
Fxa2Dg203060	48.0457	7.55704	25.148	5.25e-05	-2.43162
Fxa3Ag100762	66.4295	392.295	204.311	5.26e-05	2.3394
Fxa7Ag201452	147.097	1290.83	664.6	5.27e-05	2.85914
Fxa2Cg203513	329.153	74.2794	168.207	5.27e-05	-1.97029
Fxa7Cg101329	2.9484	69.6378	28.486	5.29e-05	4.1358
Fxa5Ag201183	601.305	209.595	369.282	5.29e-05	-1.41182
Fxa7Bg202571	115.706	15.0259	55.7952	5.29e-05	-2.68912
Fxa7Dg101637	31.1239	433.744	182.838	5.29e-05	3.45194
Fxa1Dg200255	786.579	301.442	516.954	5.29e-05	-1.28738
Fxa6Cg101816	583.636	288.646	424.826	5.32e-05	-0.956616
Fxa3Ag101877	43.9418	183.899	123.621	5.32e-05	1.90168
Fxa4Dg102625	14.0678	117.558	53.258	5.32e-05	2.78384
Fxa3Cg102589	2549.39	882.304	1344.73	5.32e-05	-1.42057
Fxa3Ag101511	357.574	1291.6	678.778	5.32e-05	1.70959
Fxa1Bg201532	516.793	3430.56	1602.12	5.32e-05	2.49689
Fxa6Bg103489	244.967	78.5701	140.404	5.33e-05	-1.5245
Fxa6Dg102560	180.648	1679.64	748.026	5.34e-05	2.9344
Fxa4Dg100852	243.323	14.4445	112.081	5.35e-05	-3.68961
Fxa5Ag201332	372.402	144.148	233.447	5.35e-05	-1.2729
Fxa4Ag100242	157.261	550.807	339.367	5.38e-05	1.6699
Fxa5Ag200728	272.885	78.3224	182.634	5.38e-05	-1.66068
Fxa3Cg100529	27.0462	266.112	97.4465	5.42e-05	3.01428
Fxa1Bg202148	12.3923	107.6	53.2531	5.46e-05	2.84089
Fxa6Dg102980	144.133	16.8087	78.9619	5.46e-05	-2.82615
Fxa3Cg102077	3327.15	1190.24	2191.09	5.48e-05	-1.37761
Fxa5Ag203616	13.4403	108.796	44.4643	5.5e-05	2.74172
Fxa6Dg103188	10.8909	77.0244	29.0575	5.5e-05	2.6007
Fxa2Ag103736	213.645	85.3314	160.455	5.5e-05	-1.23828
Fxa4Bg101457	2720.28	15249.9	7345	5.51e-05	2.27522
Fxa5Bg103231	72.8686	16.6972	36.0696	5.51e-05	-1.94381
Fxa4Bg102509	31.3177	84.4682	71.7985	5.51e-05	1.3251
Fxa7Ag201132	68.3319	8.94911	28.0094	5.52e-05	-2.70055
Fxa7Ag202568	944.68	1815.91	1385.88	5.55e-05	0.893336
Fxa6Ag103003	342.986	112.131	210.588	5.58e-05	-1.48997
Fxa7Cg102919	211.062	781.365	476.922	5.58e-05	1.73855
Fxa4Cg201492	12.9576	119.842	60.5354	5.6e-05	2.90893
Fxa4Ag103135	293.666	108.255	229.503	5.62e-05	-1.34822
Fxa3Ag100154	97.0253	1549.96	685.074	5.64e-05	3.63387
Fxa5Ag200888	1055.4	422.965	618.475	5.7e-05	-1.22994
Fxa3Ag100159	4793.3	1446.2	2491.37	5.73e-05	-1.59476
Fxa5Bg100282	91.5389	21.6431	55.1747	5.74e-05	-1.92099
Fxa2Bg201876	15561.3	4382.21	8993.82	5.76e-05	-1.65547
Fxa3Cg102164	1523.2	262.778	554.879	5.78e-05	-2.3147
Fxa4Cg200116	19.0061	181.061	81.7722	5.81e-05	2.94795
Fxa7Ag202656	0.7371	111.488	32.119	5.82e-05	6.58137
Fxa6Ag103784	135.498	485.411	284.145	5.84e-05	1.6994
Fxa2Cg200198	452.119	2840.16	1709.72	5.84e-05	2.42484
Fxa6Ag103108	311.314	997.935	637.514	5.84e-05	1.55291
Fxa7Ag200624	2.83528	37.7808	22.4244	5.84e-05	3.36366
Fxa6Dg100859	6836.66	1037.82	3396.63	5.85e-05	-2.47569
Fxa4Cg201796	299.01	91.1099	163.245	5.85e-05	-1.58681
Fxa6Cg100748	5.28515	112.74	42.906	5.85e-05	3.98674
Fxa4Ag101967	443.122	2682.99	1781.96	5.85e-05	2.37617
Fxa7Bg201395	1043.44	424.086	676.5	5.86e-05	-1.21087
Fxa1Cg100456	1.91957	245.668	120.465	5.86e-05	6.25842
Fxa2Ag101066	107.445	7.02399	52.5699	5.86e-05	-3.54968
Fxa2Bg201476	456.085	184.222	280.51	5.88e-05	-1.22524
Fxa3Dg201132	1428.26	10548.3	5437.56	5.91e-05	2.63294
Fxa5Bg101603	0	27.4657	7.85737	5.91e-05	7.22786
Fxa7Dg101559	83.894	12.3208	37.4423	5.91e-05	-2.53952
Fxa4Dg100107	3.94093	32.5634	24.6938	5.93e-05	2.76199
Fxa7Ag202532	415.551	26.0265	160.001	5.95e-05	-3.62108
Fxa5Bg100388	12.779	101.052	48.3753	5.95e-05	2.69449
Fxa7Cg101282	62.2889	12.8203	31.1152	6e-05	-2.077
Fxa6Cg103467	939.782	71.0481	383.659	6.01e-05	-3.37081
Fxa1Cg101306	4196.69	1057.71	2084.85	6.01e-05	-1.82545
Fxa4Cg202365	294.103	29.705	107.171	6.02e-05	-3.0106
Fxa2Bg200738	1022.33	266.111	729.991	6.08e-05	-1.78402
Fxa6Bg104114	854.447	76.03	343.014	6.11e-05	-3.16735
Fxa7Ag200735	48.4992	172.908	112.908	6.16e-05	1.69173
Fxa5Ag202421	2.38537	43.9088	19.4769	6.18e-05	3.74995
Fxa1Cg100066	23.5299	341.567	130.157	6.18e-05	3.50144
Fxa4Ag102091	288.537	632.057	458.116	6.2e-05	1.06204
Fxa3Cg102585	1537.09	574.029	1006.96	6.21e-05	-1.32225
Fxa5Dg200399	360.343	130.909	239.415	6.24e-05	-1.35187
Fxa3Ag102897	695.64	10766.8	4297.78	6.24e-05	3.59258
Fxa3Bg201805	123.244	345.379	218.378	6.25e-05	1.37668
Fxa6Ag103757	226.231	1396.02	997.537	6.26e-05	2.39746
Fxa3Cg103762	328.009	17.5604	108.497	6.32e-05	-3.82535
Fxa2Cg200980	250.571	71.9021	139.91	6.32e-05	-1.65743
Fxa3Cg103631	134.893	989.695	452.537	6.33e-05	2.6201
Fxa3Cg101697	233.53	108.044	164.805	6.36e-05	-1.04233
Fxa2Dg202661	374.332	149.122	264.73	6.36e-05	-1.23279
Fxa6Dg102898	4761.21	411.721	1704.16	6.36e-05	-3.20994
Fxa1Bg202668	220.755	542.502	362.825	6.37e-05	1.2117
Fxa2Cg200522	222.349	618.272	385.15	6.38e-05	1.36911
Fxa4Ag103273	2.48812	69.4916	21.6932	6.39e-05	4.42253
Fxa4Cg200357	44.1392	287.684	141.738	6.41e-05	2.46125
Fxa2Bg200175	289.772	1430.57	763.409	6.42e-05	2.10859
Fxa6Cg103136	3.63786	47.7475	22.959	6.43e-05	3.35866
Fxa6Bg104181	28.6361	140.046	61.9723	6.43e-05	2.09507
Fxa7Bg202473	29.9501	183.451	128.456	6.48e-05	2.38027
Fxa2Dg202953	126.06	34.4578	79.6434	6.51e-05	-1.70637
Fxa3Bg200144	1351.87	345.606	779.03	6.55e-05	-1.80492
Fxa5Bg100128	248.352	558.845	369.422	6.59e-05	1.0961
Fxa7Dg101359	295.14	99.6058	135.49	6.63e-05	-1.45262
Fxa6Ag103818	6.87442	84.2076	31.6012	6.64e-05	3.27829
Fxa4Dg100959	51.7864	7.38968	32.1595	6.65e-05	-2.54095
Fxa3Bg201098	215.279	765.913	473.59	6.65e-05	1.6857
Fxa1Cg100675	357.575	98.2842	202.057	6.65e-05	-1.71403
Fxa7Dg100228	71.9954	375.838	190.173	6.73e-05	2.17486
Fxa4Bg103205	272.245	23.0323	99.7956	6.73e-05	-3.22785
Fxa3Cg100413	3082.14	891.496	1756.43	6.74e-05	-1.64721
Fxa4Ag100215	7.56161	148.273	58.9414	6.75e-05	3.92135
Fxa5Bg103321	2579.41	207.361	1165.54	6.75e-05	-3.29209
Fxa7Cg101643	911.175	135.129	407.551	6.76e-05	-2.50411
Fxa2Ag103567	120.987	1206.11	598.356	6.76e-05	3.01502
Fxa4Cg202769	424.259	123.087	249.044	6.77e-05	-1.64734
Fxa7Ag202327	449.079	1352.03	805.921	6.78e-05	1.47195
Fxa2Cg201481	32.1047	328.359	160.519	6.78e-05	3.04589
Fxa5Dg201989	5998.8	2488.48	3933.76	6.78e-05	-1.18617
Fxa1Ag101178	305.684	747.282	506.924	6.79e-05	1.20314
Fxa5Dg201181	750.146	358.35	538.5	6.8e-05	-1.00522
Fxa4Bg102633	81.9216	13.0478	37.168	6.81e-05	-2.423
Fxa5Bg102063	125.909	754.044	381.781	6.81e-05	2.35408
Fxa2Ag103561	636.092	41.3009	274.008	6.85e-05	-3.5646
Fxa1Bg201715	61.5437	179.888	119.239	6.85e-05	1.42542
Fxa5Dg200838	39.4731	172.276	92.8724	6.85e-05	1.93705
Fxa2Cg200293	229.73	44.977	133.399	6.86e-05	-2.1355
Fxa1Ag101847	44.122	445.024	222.71	6.87e-05	3.02832
Fxa2Bg202961	771.817	211.023	532.08	6.9e-05	-1.71937
Fxa6Bg100749	263.329	1296.42	676.362	6.9e-05	2.10522
Fxa4Bg102654	105.124	16.7882	51.4346	6.92e-05	-2.39632
Fxa2Cg201004	201.07	69.8272	133.517	6.94e-05	-1.41252
Fxa6Dg103119	495.556	27.0209	184.612	6.94e-05	-3.78679
Fxa3Ag100685	128.561	30.726	70.8728	6.94e-05	-1.8911
Fxa5Cg200776	31.7342	225.394	121.14	6.95e-05	2.57157
Fxa2Cg202600	14.9021	105.077	51.7256	6.97e-05	2.56052
Fxa5Bg103065	239.681	1698.39	892.55	6.97e-05	2.57313
Fxa7Dg102421	22.3338	77.4545	55.4227	6.97e-05	1.66233
Fxa2Ag103155	612.631	172.716	421.885	6.97e-05	-1.67955
Fxa5Cg203008	367.947	64.519	152.098	7.04e-05	-2.28394
Fxa2Dg201990	172.229	21.7886	86.9612	7.05e-05	-2.70495
Fxa3Ag102252	219.054	92.1399	151.269	7.1e-05	-1.16248
Fxa7Dg102749	152.464	530.76	299.415	7.15e-05	1.65427
Fxa3Ag100070	1547.27	3691.38	2387.05	7.15e-05	1.17242
Fxa7Ag201164	10.3596	127.517	91.2531	7.2e-05	3.29249
Fxa6Ag103678	429.495	75.9108	260.689	7.2e-05	-2.28028
Fxa6Cg102499	0.36855	63.0152	21.4078	7.23e-05	6.55314
Fxa6Cg102487	850.052	270.826	504.814	7.23e-05	-1.52486
Fxa4Cg202248	143.033	706.743	387.089	7.23e-05	2.10683
Fxa6Dg103171	1657.38	281.578	736.076	7.23e-05	-2.32685
Fxa2Bg203453	1246	130.467	565.832	7.25e-05	-2.95068
Fxa4Bg10282A	39.8378	2.74318	16.6828	7.33e-05	-3.5138
Fxa6Dg101525	1.32834	51.1919	17.1092	7.35e-05	4.69045
Fxa6Ag101167	2.53674	409.373	106.421	7.4e-05	6.64422
Fxa3Bg201808	1.05703	54.5641	19.1814	7.42e-05	5.11462
Fxa1Cg101711	87.4298	9.91396	43.6925	7.42e-05	-2.85725
Fxa1Bg201741	18.7782	97.465	45.9615	7.42e-05	2.17451
Fxa5Ag200434	114.583	43.6242	76.9187	7.42e-05	-1.28044
Fxa5Ag201570	608.047	2037.12	1142.98	7.46e-05	1.60718
Fxa1Cg101937	72.5059	15.4047	40.2753	7.47e-05	-2.05835
Fxa5Ag202971	202.18	380.304	288.167	7.49e-05	0.860476
Fxa4Cg203058	0	34.1174	12.1173	7.49e-05	7.48294
Fxa6Bg100703	651.442	148.631	353.067	7.53e-05	-1.94952
Fxa5Dg203209	1285.38	14866.4	6506.51	7.58e-05	3.20756
Fxa7Cg101001	1.32834	94.859	53.3852	7.59e-05	5.48567
Fxa1Bg200041	151.59	12.5456	59.9919	7.61e-05	-3.25641
Fxa3Ag100018	62.3975	225.249	112.429	7.68e-05	1.69831
Fxa6Cg104472	277.593	1388.47	824.124	7.69e-05	2.12406
Fxa2Ag100620	219.568	14.2653	94.6036	7.7e-05	-3.55785
Fxa3Cg100662	42.8883	181.366	111.018	7.72e-05	1.90038
Fxa4Bg102267	1215.47	550.189	829.469	7.72e-05	-1.07124
Fxa5Dg201116	275.419	2108.95	1145.4	7.72e-05	2.67216
Fxa6Cg103974	716.351	267.71	511.881	7.72e-05	-1.31593
Fxa3Cg101257	2157.45	814.12	1423.79	7.8e-05	-1.30387
Fxa2Cg202363	156.938	461.511	275.181	7.81e-05	1.4406
Fxa5Ag200761	2180.64	960.347	1369.5	7.82e-05	-1.10613
Fxa7Ag201494	5.12794	54.3046	30.7818	7.83e-05	3.07956
Fxa7Ag200799	609.983	5656.49	2346.51	7.84e-05	2.92198
Fxa4Ag100275	101.081	592.743	413.494	7.85e-05	2.32133
Fxa7Cg102129	372.837	157.901	271.806	7.88e-05	-1.15313
Fxa7Bg202875	152.425	6.20884	56.2386	7.89e-05	-4.18097
Fxa7Ag201246	16.4587	222.52	81.774	7.92e-05	3.40123
Fxa3Bg200466	27.2322	132.814	77.9089	7.94e-05	2.0763
Fxa3Cg100774	449.248	129.445	229.708	7.95e-05	-1.64984
Fxa5Cg200418	52.8515	399.574	152.274	7.95e-05	2.65243
Fxa3Cg101612	1887.82	952.308	1310.79	7.95e-05	-0.93191
Fxa6Ag100138	672.141	274.044	442.955	7.96e-05	-1.20294
Fxa7Ag200827	219.333	63.3902	115.065	7.97e-05	-1.64936
Fxa1Cg101683	512.062	64.3004	212.493	7.99e-05	-2.71549
Fxa2Dg201851	315.365	57.4882	187.683	8.01e-05	-2.23913
Fxa6Ag101214	101.808	324.117	196.303	8.12e-05	1.5421
Fxa2Dg202869	1636.79	442.591	855.411	8.13e-05	-1.73105
Fxa7Cg101607	436.354	136.709	251.964	8.17e-05	-1.54388
Fxa7Cg101162	564.189	21.6547	209.434	8.25e-05	-4.23344
Fxa1Ag102223	494.853	58.99	204.823	8.28e-05	-2.77816
Fxa5Cg202309	43.2017	250.061	104.447	8.3e-05	2.30193
Fxa7Cg101876	34.5316	278.486	105.802	8.3e-05	2.74164
Fxa3Ag100699	153.633	446.539	306.344	8.32e-05	1.42233
Fxa7Bg200968	111.324	312.887	226.27	8.33e-05	1.37702
Fxa2Ag103014	1285.05	9596.47	4512.84	8.33e-05	2.63879
Fxa1Cg100428	525.352	82.6454	242.017	8.38e-05	-2.42562
Fxa5Cg202424	637.89	150.458	365.783	8.42e-05	-1.90421
Fxa3Dg202105	2296.36	761.177	1536.96	8.43e-05	-1.47158
Fxa2Dg200260	128.477	31.2063	78.9179	8.5e-05	-1.85747
Fxa7Cg101295	356.952	1983.83	1161.42	8.51e-05	2.25667
Fxa5Dg202133	867.276	177.425	309.084	8.51e-05	-2.08437
Fxa6Ag103838	491.004	5152.3	2303.69	8.51e-05	3.07562
Fxa7Dg100461	1979.53	1004.19	1384.52	8.53e-05	-0.923431
Fxa3Cg103382	1353.41	81.6541	570.724	8.56e-05	-3.64972
Fxa3Ag103895	168.039	57.4987	101.561	8.57e-05	-1.43046
Fxa5Dg200115	262.223	1550.29	872.614	8.59e-05	2.33519
Fxa6Dg101039	937.536	155.774	397.07	8.62e-05	-2.35445
Fxa5Dg202653	0.449911	53.8837	17.7424	8.64e-05	6.28798
Fxa4Bg101153	206.264	442.809	317.366	8.67e-05	1.03421
Fxa6Dg100175	5116.12	1751.74	3006.03	8.71e-05	-1.43859
Fxa2Ag101805	14.7517	125.516	56.109	8.74e-05	2.78783
Fxa3Cg100655	38.6009	270.876	106.986	8.78e-05	2.54575
Fxa5Dg202478	646.323	120.524	318.303	8.79e-05	-2.2042
Fxa5Ag200597	2087.98	143.893	824.179	8.8e-05	-3.47943
Fxa7Bg200384	83.6898	2.74318	33.5286	8.81e-05	-4.45059
Fxa7Ag201579	358.521	47.9616	147.325	8.83e-05	-2.63528
Fxa5Dg200537	0	23.2791	7.32209	8.92e-05	7.03781
Fxa5Dg200936	133.886	882.392	448.773	8.93e-05	2.47075
Fxa3Bg203707	0	36.3013	10.3717	9.01e-05	7.59514
Fxa2Dg200702	759.75	180.876	417.681	9.02e-05	-1.88831
[truncated: 99,845 more rows]
