# Supplementary material for: Pathogenesis-related proteins are evolutionarily conserved across diploid and octoploid Fragaria species
Source: Research Square preprint supplement (doi:10.21203/rs.3.rs-7264946/v1), 2025-08-27
Supplement: Supplementary file 3 [file 63f59b16b7c7cfa1477fd6ba.xlsx]

## Sheet: Sheet1
Chromosome	Start (bp)	End (bp)	Gene	Family
chr_1C	7783514	7783987	Fxa1Cg101298.1	PR1
chr_1C	7786007	7790721	Fxa1Cg101299.1	PR1
chr_2A	1681417	1681935	Fxa2Ag100251.1	PR1
chr_2A	1682946	1683443	Fxa2Ag100252.1	PR1
chr_2A	1696363	1712910	Fxa2Ag100256.1	PR1
chr_2A	1714121	1717894	Fxa2Ag100257.1	PR1
chr_2A	1719103	1719495	Fxa2Ag100258.1	PR1
chr_2A	1729435	1729833	Fxa2Ag100259.1	PR1
chr_2B	1445819	1446316	Fxa2Bg200180.1	PR1
chr_2B	1457605	1458312	Fxa2Bg200181.1	PR1
chr_2B	1459156	1459653	Fxa2Bg200182.1	PR1
chr_2D	1996430	1996877	Fxa2Dg200227.1	PR1
chr_2D	1997876	1998373	Fxa2Dg200228.1	PR1
chr_4A	8108061	8108630	Fxa4Ag100903.1	PR1
chr_4A	8109914	8110429	Fxa4Ag100904.1	PR1
chr_4B	9846015	9847237	Fxa4Bg100830.1	PR1
chr_4B	9847826	9848341	Fxa4Bg100831.1	PR1
chr_4D	6968701	6969216	Fxa4Dg100661.1	PR1
chr_4D	6970923	6971492	Fxa4Dg100662.1	PR1
chr_1A	4223345	4223880	Fxa1Ag100758.1	PR2
chr_1A	4223932	4224249	Fxa1Ag100759.1	PR2
chr_1A	13242129	13243831	Fxa1Ag102106.1	PR2
chr_1A	13244749	13246373	Fxa1Ag102107.1	PR2
chr_1B	13158281	13159963	Fxa1Bg201988.1	PR2
chr_1B	13160896	13162524	Fxa1Bg201989.1	PR2
chr_1C	14462041	14462531	Fxa1Cg102102.1	PR2
chr_1C	14463195	14465753	Fxa1Cg102103.1	PR2
chr_1D	3940106	3941432	Fxa1Dg200667.1	PR2
chr_1D	3941580	3943721	Fxa1Dg200668.1	PR2
chr_2B	14797284	14798308	Fxa2Bg201690.1	PR2
chr_2B	14798393	14809084	Fxa2Bg201691.1	PR2
chr_2B	14812000	14813452	Fxa2Bg201692.1	PR2
chr_2C	20780593	20781584	Fxa2Cg202662.1	PR2
chr_2C	20791087	20792852	Fxa2Cg202663.1	PR2
chr_3D	3531327	3532123	Fxa3Dg200575.1	PR2
chr_3D	3531549	3532147	Fxa3Dg200576.1	PR2
chr_4A	12323035	12323828	Fxa4Ag101382.1	PR2
chr_4A	12323212	12324231	Fxa4Ag101383.1	PR2
chr_6A	25206739	25207918	Fxa6Ag103580.1	PR2
chr_6A	25210957	25211403	Fxa6Ag103581.1	PR2
chr_6C	26079014	26080189	Fxa6Cg103192.1	PR2
chr_6C	26082532	26082969	Fxa6Cg103193.1	PR2
chr_6D	24929968	24930384	Fxa6Dg103104.1	PR2
chr_6D	24932752	24937203	Fxa6Dg103105.1	PR2
chr_7D	17891881	17892181	Fxa7Dg102047.1	PR2
chr_7D	17893963	17894555	Fxa7Dg102048.1	PR2
chr_1A	5540760	5541834	Fxa1Ag100971.1	PR3
chr_1A	5543348	5554528	Fxa1Ag100972.1	PR3
chr_1D	5122686	5123528	Fxa1Dg200848.1	PR3
chr_1D	5124610	5128379	Fxa1Dg200849.1	PR3
chr_5C	958085	958765	Fxa5Cg200150.1	PR5
chr_5C	959922	960668	Fxa5Cg200151.1	PR5
chr_7B	18322798	18333393	Fxa7Bg202286.1	PR5
chr_7B	18328989	18329979	Fxa7Bg202287.1	PR5
chr_7D	18129360	18132893	Fxa7Dg102085.1	PR5
chr_7D	18134322	18148833	Fxa7Dg102086.1	PR5
chr_4A	1726858	1728408	Fxa4Ag100208.1	PR6
chr_4A	1749376	1752169	Fxa4Ag100209.1	PR6
chr_4B	2138218	2140577	Fxa4Bg100203.1	PR6
chr_4B	2148295	2148985	Fxa4Bg100204.1	PR6
chr_2A	23750919	23757067	Fxa2Ag103344.1	PR7
chr_2A	23763476	23765650	Fxa2Ag103345.1	PR7
chr_2A	23789511	23789801	Fxa2Ag103348.1	PR7
chr_2A	23789821	23793146	Fxa2Ag103349.1	PR7
chr_2A	23794400	23796671	Fxa2Ag103350.1	PR7
chr_2A	23799704	23801878	Fxa2Ag103351.1	PR7
chr_2B	23957644	23959920	Fxa2Bg203137.1	PR7
chr_2B	23962810	23963229	Fxa2Bg203138.1	PR7
chr_2C	4165437	4167734	Fxa2Cg200722.1	PR7
chr_2C	4171217	4173857	Fxa2Cg200723.1	PR7
chr_2C	4186934	4187668	Fxa2Cg200724.1	PR7
chr_2C	4187666	4191971	Fxa2Cg200725.1	PR7
chr_2C	4187684	4188538	Fxa2Cg200726.1	PR7
chr_2C	4191248	4193035	Fxa2Cg200727.1	PR7
chr_2D	24180104	24190388	Fxa2Dg202930.1	PR7
chr_2D	24196737	24198119	Fxa2Dg202931.1	PR7
chr_3A	15611239	15615391	Fxa3Ag102351.1	PR7
chr_3A	15615697	15617253	Fxa3Ag102352.1	PR7
chr_5B	757194	763154	Fxa5Bg100114.1	PR7
chr_5B	763155	763811	Fxa5Bg100115.1	PR7
chr_5B	764833	765594	Fxa5Bg100116.1	PR7
chr_5B	765606	774519	Fxa5Bg100117.1	PR7
chr_6B	532655	534814	Fxa6Bg100093.1	PR7
chr_6B	536487	542597	Fxa6Bg100094.1	PR7
chr_6D	507443	509752	Fxa6Dg100086.1	PR7
chr_6D	511688	517592	Fxa6Dg100087.1	PR7
chr_3A	27510582	27518310	Fxa3Ag103748.1	PR9
chr_3A	27518367	27521554	Fxa3Ag103749.1	PR9
chr_3A	27534677	27535992	Fxa3Ag103751.1	PR9
chr_3A	27539236	27549584	Fxa3Ag103752.1	PR9
chr_4C	19927840	19929017	Fxa4Cg202083.1	PR9
chr_4C	19941588	19942777	Fxa4Cg202084.1	PR9
chr_4D	18179652	18188639	Fxa4Dg101927.1	PR9
chr_4D	18189919	18190632	Fxa4Dg101928.1	PR9
chr_5B	13044577	13045829	Fxa5Bg101906.1	PR9
chr_5B	13068812	13070061	Fxa5Bg101907.1	PR9
chr_6A	28763495	28764863	Fxa6Ag104140.1	PR9
chr_6A	28767718	28775710	Fxa6Ag104141.1	PR9
chr_6C	23664867	23665349	Fxa6Cg102886.1	PR9
chr_6C	23665537	23666023	Fxa6Cg102887.1	PR9
chr_7A	21857492	21859219	Fxa7Ag203228.1	PR9
chr_7A	21859064	21860346	Fxa7Ag203229.1	PR9
chr_7B	19134868	19136250	Fxa7Bg202402.1	PR9
chr_7B	19137015	19142475	Fxa7Bg202403.1	PR9
chr_7D	18783897	18785628	Fxa7Dg102204.1	PR9
chr_7D	18786202	18787671	Fxa7Dg102205.1	PR9
chr_4A	16368319	16390543	Fxa4Ag101887.1	PR10
chr_4A	16373389	16391033	Fxa4Ag101888.1	PR10
chr_4A	16391970	16392452	Fxa4Ag101889.1	PR10
chr_4A	16427323	16433114	Fxa4Ag101895.1	PR10
chr_4A	16455383	16455997	Fxa4Ag101896.1	PR10
chr_4A	16894163	16894645	Fxa4Ag101967.1	PR10
chr_4A	16895275	16895788	Fxa4Ag101968.1	PR10
chr_4B	20566222	20567403	Fxa4Bg101810.1	PR10
chr_4B	20566231	20567417	Fxa4Bg101811.1	PR10
chr_4B	20568212	20571320	Fxa4Bg101812.1	PR10
chr_4B	20569644	20570127	Fxa4Bg101813.1	PR10
chr_4B	20641824	20646561	Fxa4Bg101824.1	PR10
chr_4B	20658418	20659011	Fxa4Bg101825.1	PR10
chr_4B	20666764	20667491	Fxa4Bg101827.1	PR10
chr_4B	20666901	20667663	Fxa4Bg101828.1	PR10
chr_4B	20669162	20669593	Fxa4Bg101829.1	PR10
chr_4B	20687930	20691725	Fxa4Bg101833.1	PR10
chr_4B	20688498	20691557	Fxa4Bg101834.1	PR10
chr_4B	20696078	20696582	Fxa4Bg101836.1	PR10
chr_4B	20703704	20704186	Fxa4Bg101837.1	PR10
chr_4B	21176202	21178073	Fxa4Bg101900.1	PR10
chr_4B	21178722	21179235	Fxa4Bg101901.1	PR10
chr_4C	16386143	16390090	Fxa4Cg201585.1	PR10
chr_4C	16387080	16387589	Fxa4Cg201586.1	PR10
chr_4C	16387875	16391284	Fxa4Cg201587.1	PR10
chr_4C	16475997	16482940	Fxa4Cg201597.1	PR10
chr_4C	16493458	16494048	Fxa4Cg201598.1	PR10
chr_4C	16505484	16506077	Fxa4Cg201599.1	PR10
chr_4C	16511872	16512354	Fxa4Cg201600.1	PR10
chr_4C	16512440	16521314	Fxa4Cg201601.1	PR10
chr_4C	16520712	16521434	Fxa4Cg201602.1	PR10
chr_4C	16522848	16523352	Fxa4Cg201603.1	PR10
chr_4C	16522861	16523343	Fxa4Cg201604.1	PR10
chr_4C	16524281	16524969	Fxa4Cg201605.1	PR10
chr_4C	16524466	16524948	Fxa4Cg201606.1	PR10
chr_4C	16538504	16538986	Fxa4Cg201607.1	PR10
chr_4C	16542501	16542983	Fxa4Cg201608.1	PR10
chr_4C	16555162	16555650	Fxa4Cg201610.1	PR10
chr_4C	16557213	16557515	Fxa4Cg201611.1	PR10
chr_4C	16561623	16562230	Fxa4Cg201612.1	PR10
chr_4D	14729048	14733824	Fxa4Dg101452.1	PR10
chr_4D	14771195	14771788	Fxa4Dg101453.1	PR10
chr_4D	14787213	14790995	Fxa4Dg101455.1	PR10
chr_4D	14787781	14790827	Fxa4Dg101456.1	PR10
chr_4D	14792424	14792927	Fxa4Dg101457.1	PR10
chr_4D	14803582	14811178	Fxa4Dg101458.1	PR10
chr_4D	14816184	14818303	Fxa4Dg101459.1	PR10
chr_4D	15241984	15242466	Fxa4Dg101511.1	PR10
chr_4D	15243070	15243583	Fxa4Dg101512.1	PR10
chr_4D	18513873	18514232	Fxa4Dg101971.1	PR10
chr_4D	18515208	18515690	Fxa4Dg101972.1	PR10
chr_4D	18515530	18516743	Fxa4Dg101973.1	PR10
chr_1A	654495	687814	Fxa1Ag100127.1	PR11
chr_1A	695802	696413	Fxa1Ag100128.1	PR11
chr_1C	672021	682499	Fxa1Cg100121.1	PR11
chr_1C	683137	684373	Fxa1Cg100122.1	PR11
chr_6A	5053811	5054179	Fxa6Ag100874.1	PR14
chr_6A	5062925	5063272	Fxa6Ag100875.1	PR14
chr_6A	5074519	5075059	Fxa6Ag100876.1	PR14
chr_6A	5075365	5087266	Fxa6Ag100877.1	PR14
chr_6A	5076064	5084338	Fxa6Ag100878.1	PR14
chr_1A	4228901	4238856	Fxa1Ag100762.1	PR16
chr_1A	4242288	4242929	Fxa1Ag100763.1	PR16
chr_2B	4198106	4198480	Fxa2Bg200518.1	PR16
chr_2B	4198511	4198741	Fxa2Bg200519.1	PR16
chr_3A	4868970	4869593	Fxa3Ag100798.1	PR16
chr_3A	4871213	4871839	Fxa3Ag100799.1	PR16
chr_3A	6180460	6189918	Fxa3Ag100995.1	PR16
chr_3A	6185778	6186746	Fxa3Ag100996.1	PR16
chr_3A	6201310	6207436	Fxa3Ag100997.1	PR16
chr_3A	16255666	16256226	Fxa3Ag102424.1	PR16
chr_3A	16260526	16261086	Fxa3Ag102425.1	PR16
chr_3A	16270246	16270803	Fxa3Ag102428.1	PR16
chr_3A	16284566	16284982	Fxa3Ag102429.1	PR16
chr_3B	5396039	5398534	Fxa3Bg200894.1	PR16
chr_3B	5419733	5425582	Fxa3Bg200895.1	PR16
chr_3B	5422752	5423483	Fxa3Bg200896.1	PR16
chr_3C	4450221	4450844	Fxa3Cg100730.1	PR16
chr_3C	4452454	4453080	Fxa3Cg100731.1	PR16
chr_3C	5503395	5524229	Fxa3Cg100878.1	PR16
chr_3C	5513238	5513969	Fxa3Cg100879.1	PR16
chr_3D	5220628	5245069	Fxa3Dg200826.1	PR16
chr_3D	5225875	5226606	Fxa3Dg200827.1	PR16
chr_5A	9479954	9486103	Fxa5Ag201604.1	PR16
chr_5A	9485846	9493662	Fxa5Ag201605.1	PR16
chr_5A	9722688	9725928	Fxa5Ag201648.1	PR16
chr_5A	9723275	9724621	Fxa5Ag201649.1	PR16
chr_5B	10240575	10251682	Fxa5Bg101568.1	PR16
chr_5B	10246422	10252267	Fxa5Bg101569.1	PR16
chr_5D	10008063	10014184	Fxa5Dg201501.1	PR16
chr_5D	10013927	10014769	Fxa5Dg201502.1	PR16
chr_5D	10020114	10020957	Fxa5Dg201504.1	PR16
chr_5D	10026707	10027550	Fxa5Dg201505.1	PR16
chr_3A	6290328	6291923	Fxa3Ag101015.1	PR18
chr_3A	6292958	6293574	Fxa3Ag101016.1	PR18
chr_3A	6294422	6296056	Fxa3Ag101017.1	PR18
chr_3A	6356426	6356677	Fxa3Ag101023.1	PR18
chr_3A	6357799	6358177	Fxa3Ag101024.1	PR18
chr_3A	6362807	6364462	Fxa3Ag101026.1	PR18
chr_3A	6364954	6377074	Fxa3Ag101027.1	PR18
chr_3B	5468382	5488507	Fxa3Bg200904.1	PR18
chr_3B	5473406	5474696	Fxa3Bg200905.1	PR18
chr_3B	5497630	5499210	Fxa3Bg200907.1	PR18
chr_3B	5503340	5508964	Fxa3Bg200908.1	PR18
chr_3B	5507777	5508550	Fxa3Bg200909.1	PR18
chr_3B	5508711	5509006	Fxa3Bg200910.1	PR18
chr_3B	5519711	5520485	Fxa3Bg200911.1	PR18
chr_3B	5520646	5520941	Fxa3Bg200912.1	PR18
chr_3B	5531733	5533400	Fxa3Bg200916.1	PR18
chr_3B	5537337	5539019	Fxa3Bg200917.1	PR18
chr_3C	5576341	5587104	Fxa3Cg100893.1	PR18
chr_3C	5580458	5582092	Fxa3Cg100894.1	PR18
chr_3C	5594908	5599935	Fxa3Cg100895.1	PR18
chr_3C	5611417	5612991	Fxa3Cg100897.1	PR18
chr_3C	5616875	5622543	Fxa3Cg100898.1	PR18
chr_3C	5621355	5622129	Fxa3Cg100899.1	PR18
chr_3C	5645536	5645981	Fxa3Cg100902.1	PR18
chr_3C	5646934	5647254	Fxa3Cg100903.1	PR18
chr_3C	5656755	5658417	Fxa3Cg100907.1	PR18
chr_3C	5661204	5674643	Fxa3Cg100908.1	PR18
chr_3D	5289135	5290730	Fxa3Dg200835.1	PR18
chr_3D	5291961	5292543	Fxa3Dg200836.1	PR18
chr_3D	5309666	5310839	Fxa3Dg200843.1	PR18
chr_3D	5321950	5329713	Fxa3Dg200844.1	PR18
chr_3D	5361527	5363107	Fxa3Dg200845.1	PR18
