# Supplementary material for: Pathogenesis-related proteins are evolutionarily conserved across diploid and octoploid Fragaria species
Source: Research Square preprint supplement (doi:10.21203/rs.3.rs-7264946/v1), 2025-08-27
Supplement: Supplementary file 4 [file 9458fe7f9d61bc6018ffdfc3.xlsx]

## Sheet: F. x ananassa Royal Royce
chr	start	end	gene	family	BLAST	domain
chr_1A	7593416	7601091	Fxa1Ag101329.1	PR1	ST14_SOLTU	CAP_PR-1
chr_1B	7130145	7130663	Fxa1Bg201230.1	PR1	ST14_SOLTU	CAP_PR-1
chr_1C	7783514	7783987	Fxa1Cg101298.1	PR1	ST14_SOLTU	CAP_PR-1
chr_1C	7786007	7790721	Fxa1Cg101299.1	PR1	ST14_SOLTU	CAP
chr_1D	7325042	7325461	Fxa1Dg201184.1	PR1	ST14_SOLTU	CAP_PR-1
chr_2A	1346944	1349554	Fxa2Ag100194.1	PR1	PR1A_SOLLC	CAP
chr_2A	1681417	1681935	Fxa2Ag100251.1	PR1	PRB1_TOBAC	CAP_PR-1
chr_2A	1682946	1683443	Fxa2Ag100252.1	PR1	PRB1_ARATH	CAP_PR-1
chr_2A	1696363	1712910	Fxa2Ag100256.1	PR1	PRB1_ARATH	CAP_PR-1
chr_2A	1714121	1717894	Fxa2Ag100257.1	PR1	PRB1_ARATH	CAP_PR-1
chr_2A	1719103	1719495	Fxa2Ag100258.1	PR1	PR06_SOLLC	CAP_PR-1
chr_2A	1729435	1729833	Fxa2Ag100259.1	PR1	PR06_SOLLC	CAP_PR-1
chr_2A	4809997	4810275	Fxa2Ag100671.1	PR1	PR1A_TOBAC	CAP
chr_2A	13925272	13926003	Fxa2Ag101720.1	PR1	PR1A_SOLLC	CAP_PR-1
chr_2B	1238961	1239654	Fxa2Bg200149.1	PR1	PRB1_TOBAC	CAP_PR-1
chr_2B	1444513	1444788	Fxa2Bg200179.1	PR1	PRB1_ARATH	CAP
chr_2B	1445819	1446316	Fxa2Bg200180.1	PR1	PRB1_ARATH	CAP_PR-1
chr_2B	1457605	1458312	Fxa2Bg200181.1	PR1	PR1A_SOLLC	CAP
chr_2B	1459156	1459653	Fxa2Bg200182.1	PR1	PRB1_ARATH	CAP_PR-1
chr_2B	1492688	1492984	Fxa2Bg200185.1	PR1	#N/A	CAP
chr_2B	4791162	4791656	Fxa2Bg200574.1	PR1	PR1B_TOBAC	CAP_PR-1
chr_2B	13812389	13813390	Fxa2Bg201535.1	PR1	PRB1_TOBAC	CAP_PR-1
chr_2C	9175549	9175914	Fxa2Cg201381.1	PR1	PRB1_ARATH	CAP
chr_2C	9218066	9218545	Fxa2Cg201390.1	PR1	PRB1_TOBAC	CAP_PR-1
chr_2C	9601521	9607842	Fxa2Cg201447.1	PR1	PRB1_TOBAC	CAP_PR-1
chr_2C	9644172	9650107	Fxa2Cg201453.1	PR1	PRB1_TOBAC	CAP_PR-1
chr_2D	1466198	1466614	Fxa2Dg200160.1	PR1	PRB1_TOBAC	CAP_PR-1
chr_2D	1499184	1500516	Fxa2Dg200165.1	PR1	PR1_ARATH	CAP_PR-1
chr_2D	1953257	1983482	Fxa2Dg200222.1	PR1	PRB1_ARATH	CAP_PR-1
chr_2D	1984452	1984862	Fxa2Dg200224.1	PR1	PR1B_TOBAC	CAP
chr_2D	1996430	1996877	Fxa2Dg200227.1	PR1	PR1A_SOLLC	CAP
chr_2D	1997876	1998373	Fxa2Dg200228.1	PR1	PRB1_ARATH	CAP_PR-1
chr_2D	2011966	2012445	Fxa2Dg200230.1	PR1	PR1B_TOBAC	CAP_PR-1
chr_2D	13912632	13913453	Fxa2Dg201486.1	PR1	PRB1_TOBAC	CAP_PR-1
chr_3A	5730756	5731232	Fxa3Ag100935.1	PR1	PRB1_TOBAC	CAP_PR-1
chr_3A	6711167	6711574	Fxa3Ag101086.1	PR1	PR1_MEDTR	CAP_PR-1
chr_3B	5841973	5844357	Fxa3Bg200973.1	PR1	PR1_MEDTR	CAP_PR-1
chr_3C	5088887	5089339	Fxa3Cg100829.1	PR1	PRB1_TOBAC	CAP
chr_3D	4875730	4875999	Fxa3Dg200778.1	PR1	PRB1_TOBAC	CAP
chr_3D	5737045	5739737	Fxa3Dg200907.1	PR1	PR1_MEDTR	CAP_PR-1
chr_4A	8108061	8108630	Fxa4Ag100903.1	PR1	PR1_MEDTR	CAP_PR-1
chr_4A	8109914	8110429	Fxa4Ag100904.1	PR1	PR1_MEDTR	CAP_PR-1
chr_4B	9781120	9782342	Fxa4Bg100818.1	PR1	PR1_MEDTR	CAP
chr_4B	9802738	9803961	Fxa4Bg100822.1	PR1	PR1_MEDTR	CAP
chr_4B	9824405	9825628	Fxa4Bg100826.1	PR1	PR1_MEDTR	CAP
chr_4B	9846015	9847237	Fxa4Bg100830.1	PR1	PR1_MEDTR	CAP
chr_4B	9847826	9848341	Fxa4Bg100831.1	PR1	PR1_MEDTR	CAP_PR-1
chr_4D	6968701	6969216	Fxa4Dg100661.1	PR1	PR1_MEDTR	CAP_PR-1
chr_4D	6970923	6971492	Fxa4Dg100662.1	PR1	PR1_MEDTR	CAP_PR-1
chr_2A	19453419	19454203	Fxa2Ag102622.1	PR10	PRU1_PRUAR	Bet_v1-like
chr_2B	20040203	20040986	Fxa2Bg202478.1	PR10	PRU1_PRUAR	Bet_v1-like
chr_2C	25889646	25890433	Fxa2Cg203370.1	PR10	PRU1_PRUAR	Bet_v1-like
chr_2D	21312208	21312991	Fxa2Dg202499.1	PR10	PRU1_PRUAR	Bet_v1-like
chr_4A	16262233	16262715	Fxa4Ag101872.1	PR10	FRA18_FRAAN	Bet_v1-like
chr_4A	16326929	16332651	Fxa4Ag101884.1	PR10	FRA17_FRAAN	Bet_v1-like
chr_4A	16368319	16390543	Fxa4Ag101887.1	PR10	FRA1A_FRAAN	Bet_v1-like
chr_4A	16373389	16391033	Fxa4Ag101888.1	PR10	FRA13_FRAAN	Bet_v1-like
chr_4A	16391970	16392452	Fxa4Ag101889.1	PR10	FRA18_FRAAN	Bet_v1-like
chr_4A	16393245	16393727	Fxa4Ag101890.1	PR10	FRA16_FRAAN	Bet_v1-like
chr_4A	16427323	16433114	Fxa4Ag101895.1	PR10	CNGC1_ARATH	SRPBCC
chr_4A	16455383	16455997	Fxa4Ag101896.1	PR10	FRA13_FRAAN	Bet_v1-like
chr_4A	16894163	16894645	Fxa4Ag101967.1	PR10	FRA17_FRAAN	Bet_v1-like
chr_4A	16895275	16895788	Fxa4Ag101968.1	PR10	#N/A	PAP2_like
chr_4B	20566222	20567403	Fxa4Bg101810.1	PR10	#N/A	PAP2_like
chr_4B	20566231	20567417	Fxa4Bg101811.1	PR10	FRA16_FRAAN	Bet_v1-like
chr_4B	20568212	20571320	Fxa4Bg101812.1	PR10	FRA18_FRAAN	Bet_v1-like
chr_4B	20569644	20570127	Fxa4Bg101813.1	PR10	FRA15_FRAAN	Bet_v1-like
chr_4B	20641824	20646561	Fxa4Bg101824.1	PR10	FRA17_FRAAN	Bet_v1-like
chr_4B	20658418	20659011	Fxa4Bg101825.1	PR10	FRA1E_FRAAN	Bet_v1-like
chr_4B	20666764	20667491	Fxa4Bg101827.1	PR10	FRA13_FRAAN	Bet_v1-like
chr_4B	20666901	20667663	Fxa4Bg101828.1	PR10	Fra allergen	#N/A
chr_4B	20669162	20669593	Fxa4Bg101829.1	PR10	FRA17_FRAAN	Bet_v1-like
chr_4B	20687930	20691725	Fxa4Bg101833.1	PR10	FRA18_FRAAN	Bet_v1-like
chr_4B	20688498	20691557	Fxa4Bg101834.1	PR10	Fra allergen	#N/A
chr_4B	20696078	20696582	Fxa4Bg101836.1	PR10	#N/A	PAP2_like
chr_4B	20703704	20704186	Fxa4Bg101837.1	PR10	FRA18_FRAAN	Bet_v1-like
chr_4B	20718905	20719512	Fxa4Bg101840.1	PR10	FRA13_FRAAN	Bet_v1-like
chr_4B	21176202	21178073	Fxa4Bg101900.1	PR10	Fra allergen	#N/A
chr_4B	21178722	21179235	Fxa4Bg101901.1	PR10	Fra allergen	#N/A
chr_4C	16386143	16390090	Fxa4Cg201585.1	PR10	FRA15_FRAAN	Bet_v1-like
chr_4C	16387080	16387589	Fxa4Cg201586.1	PR10	#N/A	PAP2_like
chr_4C	16387875	16391284	Fxa4Cg201587.1	PR10	FRA18_FRAAN	Bet_v1-like
chr_4C	16475997	16482940	Fxa4Cg201597.1	PR10	FRA17_FRAAN	Bet_v1-like
chr_4C	16493458	16494048	Fxa4Cg201598.1	PR10	FRA1C_FRAAN	Bet_v1-like
chr_4C	16505484	16506077	Fxa4Cg201599.1	PR10	FRA13_FRAAN	Bet_v1-like
chr_4C	16511872	16512354	Fxa4Cg201600.1	PR10	FRA18_FRAAN	Bet_v1-like
chr_4C	16512440	16521314	Fxa4Cg201601.1	PR10	Fra allergen	#N/A
chr_4C	16520712	16521434	Fxa4Cg201602.1	PR10	FRA13_FRAAN	Bet_v1-like
chr_4C	16522848	16523352	Fxa4Cg201603.1	PR10	#N/A	PAP2_like
chr_4C	16522861	16523343	Fxa4Cg201604.1	PR10	FRA16_FRAAN	Bet_v1-like
chr_4C	16524281	16524969	Fxa4Cg201605.1	PR10	Fra allergen	#N/A
chr_4C	16524466	16524948	Fxa4Cg201606.1	PR10	FRA18_FRAAN	Bet_v1-like
chr_4C	16538504	16538986	Fxa4Cg201607.1	PR10	FRA18_FRAAN	Bet_v1-like
chr_4C	16542501	16542983	Fxa4Cg201608.1	PR10	FRA12_FRAAN	Bet_v1-like
chr_4C	16555162	16555650	Fxa4Cg201610.1	PR10	FRA13_FRAAN	Bet_v1-like
chr_4C	16557213	16557515	Fxa4Cg201611.1	PR10	FRA13_FRAAN	Bet_v1-like
chr_4C	16561623	16562230	Fxa4Cg201612.1	PR10	FRA13_FRAAN	Bet_v1-like
chr_4D	14729048	14733824	Fxa4Dg101452.1	PR10	PRU1_PRUAR	Bet_v1-like
chr_4D	14771195	14771788	Fxa4Dg101453.1	PR10	FRA1B_FRAAN	Bet_v1-like
chr_4D	14787213	14790995	Fxa4Dg101455.1	PR10	FRA18_FRAAN	Bet_v1-like
chr_4D	14787781	14790827	Fxa4Dg101456.1	PR10	Fra allergen	#N/A
chr_4D	14792424	14792927	Fxa4Dg101457.1	PR10	#N/A	PAP2_like
chr_4D	14803582	14811178	Fxa4Dg101458.1	PR10	FRA18_FRAAN	Bet_v1-like
chr_4D	14816184	14818303	Fxa4Dg101459.1	PR10	Fra allergen	#N/A
chr_4D	14816250	14826693	Fxa4Dg101460.1	PR10	FRA16_FRAAN	Bet_v1-like
chr_4D	15241984	15242466	Fxa4Dg101511.1	PR10	FRA17_FRAAN	Bet_v1-like
chr_4D	15243070	15243583	Fxa4Dg101512.1	PR10	#N/A	PAP2_like
chr_4D	18513873	18514232	Fxa4Dg101971.1	PR10	FRA18_FRAAN	SRPBCC
chr_4D	18515208	18515690	Fxa4Dg101972.1	PR10	FRA12_FRAAN	Bet_v1-like
chr_4D	18515530	18516743	Fxa4Dg101973.1	PR10	FRA18_FRAAN	SRPBCC
chr_5A	492063	492545	Fxa5Ag200076.1	PR10	FRA18_FRAAN	Bet_v1-like
chr_5B	474646	479948	Fxa5Bg100077.1	PR10	FRA18_FRAAN	Bet_v1-like
chr_5C	443408	443890	Fxa5Cg200064.1	PR10	FRA18_FRAAN	Bet_v1-like
chr_5D	433468	433950	Fxa5Dg200064.1	PR10	FRA18_FRAAN	Bet_v1-like
chr_1A	654495	687814	Fxa1Ag100127.1	PR11	CRK7_ARATH	GH18_plant_chitinase_class_V
chr_1A	695802	696413	Fxa1Ag100128.1	PR11	CHIC_ARATH	GH18_chitinase-like
chr_1A	712093	717202	Fxa1Ag100131.1	PR11	CHIC_ARATH	GH18_plant_chitinase_class_V
chr_1B	651201	660862	Fxa1Bg200119.1	PR11	CHIC_ARATH	GH18_plant_chitinase_class_V
chr_1B	661511	662747	Fxa1Bg200120.1	PR11	CHT5A_MEDTR	GH18_plant_chitinase_class_V
chr_1C	672021	682499	Fxa1Cg100121.1	PR11	CHIC_ARATH	GH18_plant_chitinase_class_V
chr_1C	683137	684373	Fxa1Cg100122.1	PR11	CHT5A_MEDTR	GH18_plant_chitinase_class_V
chr_1D	657462	667719	Fxa1Dg200109.1	PR11	CRK7_ARATH	GH18_plant_chitinase_class_V
chr_2A	27196237	27197471	Fxa2Ag103973.1	PR11	CHT5A_MEDTR	GH18_plant_chitinase_class_V
chr_2B	27127370	27128707	Fxa2Bg203731.1	PR11	CHT5A_MEDTR	GH18_plant_chitinase_class_V
chr_2C	449852	451074	Fxa2Cg200068.1	PR11	CHT5A_MEDTR	GH18_chitinase-like
chr_2D	27764701	27765905	Fxa2Dg203559.1	PR11	CHT5A_MEDTR	GH18_chitinase-like
chr_5A	6123149	6123480	unannotated:chr_5A_6123149-6123480_6	PR11	CHT5A_MEDTR	GH18_chitinase-like
chr_2A	26566224	26566649	Fxa2Ag103845.1	PR12	DEF19_ARATH	Gamma-thionin
chr_2B	26532107	26532509	Fxa2Bg203597.1	PR12	DEF19_ARATH	Gamma-thionin
chr_2C	1072733	1073138	Fxa2Cg200202.1	PR12	DEF19_ARATH	Gamma-thionin
chr_2D	9110248	9111200	Fxa2Dg200973.1	PR12	DEF19_ARATH	Knot1
chr_2D	26982883	26983302	Fxa2Dg203415.1	PR12	DEF19_ARATH	Gamma-thionin
chr_3A	626849	627422	Fxa3Ag100110.1	PR14	NLTP1_ORYSJ	nsLTP1
chr_3A	27723924	27724856	Fxa3Ag103787.1	PR14	NLTP_LACSA	nsLTP1
chr_6A	5053811	5054179	Fxa6Ag100874.1	PR14	NLTP3_PRUDU	nsLTP1
chr_6A	5062925	5063272	Fxa6Ag100875.1	PR14	NLTP_PRUAV	nsLTP1
chr_6A	5074519	5075059	Fxa6Ag100876.1	PR14	NLTP_CORAV	nsLTP1
chr_6A	5075365	5087266	Fxa6Ag100877.1	PR14	NLTP_PRUAV	nsLTP1
chr_6A	5076064	5084338	Fxa6Ag100878.1	PR14	nsLTP1	#N/A
chr_6B	4818059	4827545	Fxa6Bg100807.1	PR14	NLTP_MALDO	nsLTP1
chr_6C	4965374	4965742	Fxa6Cg100764.1	PR14	NLTP3_PRUDU	nsLTP1
chr_6D	4436761	4440921	Fxa6Dg100712.1	PR14	NLTP_MALDO	nsLTP1
chr_7A	8560418	8561024	Fxa7Ag201063.1	PR14	NLTPA_RICCO	nsLTP1
chr_7A	12918360	12918923	Fxa7Ag201666.1	PR14	NLTP8_HORVU	nsLTP1
chr_7A	19478101	19478574	Fxa7Ag202790.1	PR14	NLTP3_PRUDU	nsLTP1
chr_7B	9713384	9713991	Fxa7Bg201074.1	PR14	NLTPA_RICCO	nsLTP1
chr_7B	14317692	14318246	Fxa7Bg201665.1	PR14	NLTP8_HORVU	nsLTP1
chr_7C	14089140	14089705	Fxa7Cg101571.1	PR14	NLTP3_HORVU	nsLTP1
chr_7C	20458707	20459027	Fxa7Cg102626.1	PR14	NLTP3_PRUDU	nsLTP1
chr_7D	13895947	13896496	Fxa7Dg101433.1	PR14	NLTP3_HORVU	nsLTP1
chr_7C	9307242	9307405	unannotated:chr_7C_9307242-9307405_6	PR14	NLTPA_RICCO	AAI_LTSS
chr_7D	9468310	9468473	unannotated:chr_7D_9468310-9468473_6	PR14	NLTPA_RICCO	AAI_LTSS
chr_1A	3663116	3663703	Fxa1Ag100665.1	PR16	AB19B_PRUPE	cupin_OxOx
chr_1A	4228901	4238856	Fxa1Ag100762.1	PR16	AB19A_PRUPE	cupin_OxOx
chr_1A	4242288	4242929	Fxa1Ag100763.1	PR16	AB19A_PRUPE	cupin_OxOx
chr_1A	9745888	9746526	Fxa1Ag101660.1	PR16	AB19A_PRUPE	cupin_OxOx
chr_1A	10009423	10010068	Fxa1Ag101696.1	PR16	AB19A_PRUPE	cupin_OxOx
chr_1B	3332579	3333217	Fxa1Bg200636.1	PR16	AB19A_PRUPE	cupin_OxOx
chr_1B	3821252	3828166	Fxa1Bg200722.1	PR16	ABP20_PRUPE	cupin_OxOx
chr_1B	9258195	9258830	Fxa1Bg201535.1	PR16	AB19A_PRUPE	cupin_OxOx
chr_1B	9590919	9591524	Fxa1Bg201576.1	PR16	AB19A_PRUPE	cupin_OxOx
chr_1C	3498318	3498761	Fxa1Cg100628.1	PR16	AB19B_PRUPE	cupin_OxOx
chr_1C	4099034	4101865	Fxa1Cg100732.1	PR16	ABP20_PRUPE	cupin_OxOx
chr_1C	4105184	4105825	Fxa1Cg100734.1	PR16	AB19B_PRUPE	cupin_OxOx
chr_1C	10092305	10092940	Fxa1Cg101620.1	PR16	AB19A_PRUPE	cupin_OxOx
chr_1C	10530715	10531320	Fxa1Cg101670.1	PR16	AB19A_PRUPE	cupin_OxOx
chr_1D	3423480	3424118	Fxa1Dg200579.1	PR16	AB19A_PRUPE	cupin_OxOx
chr_1D	3945467	3952396	Fxa1Dg200670.1	PR16	AB19A_PRUPE	cupin_OxOx
chr_1D	9660302	9661102	Fxa1Dg201509.1	PR16	AB19A_PRUPE	cupin_OxOx
chr_1D	9974199	9974804	Fxa1Dg201555.1	PR16	AB19A_PRUPE	cupin_OxOx
chr_2A	4364302	4364808	Fxa2Ag100620.1	PR16	AB19A_PRUPE	cupin_OxOx
chr_2A	7898470	7899231	Fxa2Ag101006.1	PR16	GL122_ORYSJ	cupin_OxOx
chr_2B	4198106	4198480	Fxa2Bg200518.1	PR16	AB19A_PRUPE	cupin_OxOx
chr_2B	4198511	4198741	Fxa2Bg200519.1	PR16	AB19B_PRUPE	cupin_RmlC-like
chr_3A	4868970	4869593	Fxa3Ag100798.1	PR16	GL93_ORYSJ	cupin_OxOx
chr_3A	4871213	4871839	Fxa3Ag100799.1	PR16	GL93_ORYSJ	cupin_OxOx
chr_3A	5959655	5960481	Fxa3Ag100972.1	PR16	GL22_ORYSJ	cupin_OxOx
chr_3A	6180460	6189918	Fxa3Ag100995.1	PR16	GL21_ORYSJ	cupin_OxOx
chr_3A	6185778	6186746	Fxa3Ag100996.1	PR16	GL21_ORYSJ	cupin_OxOx
chr_3A	6201310	6207436	Fxa3Ag100997.1	PR16	GL21_ORYSJ	cupin_OxOx
chr_3A	6228898	6229646	Fxa3Ag101002.1	PR16	GL22_ORYSJ	cupin_OxOx
chr_3A	6239394	6240028	Fxa3Ag101004.1	PR16	GL22_ORYSJ	cupin_OxOx
chr_3A	12310418	12311437	Fxa3Ag101916.1	PR16	GL111_ARATH	cupin_OxOx
chr_3A	16255666	16256226	Fxa3Ag102424.1	PR16	GL93_ORYSJ	cupin_OxOx
chr_3A	16260526	16261086	Fxa3Ag102425.1	PR16	GL93_ORYSJ	cupin_OxOx
chr_3A	16270246	16270803	Fxa3Ag102428.1	PR16	GL93_ORYSJ	cupin_OxOx
chr_3A	16284566	16284982	Fxa3Ag102429.1	PR16	GL92_ORYSJ	cupin_OxOx
chr_3A	16287944	16288567	Fxa3Ag102431.1	PR16	GL93_ORYSJ	cupin_OxOx
chr_3A	16319587	16320147	Fxa3Ag102436.1	PR16	GL93_ORYSJ	cupin_OxOx
chr_3B	2972107	2972730	Fxa3Bg200527.1	PR16	GL93_ORYSJ	cupin_OxOx
chr_3B	5165595	5166421	Fxa3Bg200870.1	PR16	GL22_ORYSJ	cupin_OxOx
chr_3B	5396039	5398534	Fxa3Bg200894.1	PR16	GL21_ORYSJ	cupin_OxOx
chr_3B	5419733	5425582	Fxa3Bg200895.1	PR16	GL21_ORYSJ	cupin_OxOx
chr_3B	5422752	5423483	Fxa3Bg200896.1	PR16	GL21_ORYSJ	cupin_OxOx
chr_3B	5442503	5443251	Fxa3Bg200899.1	PR16	GL22_ORYSJ	cupin_OxOx
chr_3B	9911077	9913677	Fxa3Bg201503.1	PR16	GL11	#N/A
chr_3C	3215289	3215912	Fxa3Cg100517.1	PR16	GL93_ORYSJ	cupin_OxOx
chr_3C	4450221	4450844	Fxa3Cg100730.1	PR16	GL93_ORYSJ	cupin_OxOx
chr_3C	4452454	4453080	Fxa3Cg100731.1	PR16	GL93_ORYSJ	cupin_OxOx
chr_3C	5327078	5327701	Fxa3Cg100861.1	PR16	GL23_ORYSJ	cupin_OxOx
chr_3C	5503395	5524229	Fxa3Cg100878.1	PR16	GL21_ORYSJ	cupin_OxOx
chr_3C	5513238	5513969	Fxa3Cg100879.1	PR16	GL21_ORYSJ	cupin_OxOx
chr_3C	5541324	5542072	Fxa3Cg100883.1	PR16	GL22_ORYSJ	cupin_OxOx
chr_3C	11593739	11594720	Fxa3Cg101694.1	PR16	GL111_ARATH	cupin_OxOx
chr_3C	15466959	15467519	Fxa3Cg102121.1	PR16	GL93_ORYSJ	cupin_OxOx
chr_3D	2995361	2995984	Fxa3Dg200496.1	PR16	GL93_ORYSJ	cupin_OxOx
chr_3D	5220628	5245069	Fxa3Dg200826.1	PR16	GL21_ORYSJ	cupin_OxOx
chr_3D	5225875	5226606	Fxa3Dg200827.1	PR16	GL21_ORYSJ	cupin_OxOx
chr_3D	5261470	5262220	Fxa3Dg200830.1	PR16	GL22_ORYSJ	cupin_OxOx
chr_3D	11357540	11358513	Fxa3Dg201632.1	PR16	GL111_ARATH	cupin_OxOx
chr_4A	25321423	25322407	Fxa4Ag103358.1	PR16	GL11_ARATH	cupin_OxOx
chr_4B	29371300	29372234	Fxa4Bg103176.1	PR16	GL11_ARATH	cupin_OxOx
chr_4C	25720729	25721124	Fxa4Cg202970.1	PR16	GL11_ARATH	cupin_RmlC-like
chr_4D	23789314	23789979	Fxa4Dg102758.1	PR16	GL11_ARATH	cupin_OxOx
chr_5A	3969093	3969740	Fxa5Ag200646.1	PR16	ABP20_PRUPE	cupin_RmlC-like
chr_5A	8291302	8291964	Fxa5Ag201401.1	PR16	GLT2_ARATH	cupin_OxOx
chr_5A	8297659	8301680	Fxa5Ag201404.1	PR16	5FCL_ARATH	PLN02812
chr_5A	9479954	9486103	Fxa5Ag201604.1	PR16	#N/A	DUF789
chr_5A	9485846	9493662	Fxa5Ag201605.1	PR16	GL118_ARATH	cupin_OxOx
chr_5A	9722688	9725928	Fxa5Ag201648.1	PR16	GL17_ARATH	cupin_OxOx
chr_5A	9723275	9724621	Fxa5Ag201649.1	PR16	germin-like	DUF789
chr_5A	18380796	18381170	Fxa5Ag202720.1	PR16	GL21_ORYSJ	cupin_OxOx
chr_5B	3936914	3937542	Fxa5Bg100633.1	PR16	AB19A_PRUPE	cupin_RmlC-like
chr_5B	5212541	5214918	Fxa5Bg100811.1	PR16	IPMKB_ARATH	PLN02667
chr_5B	10240575	10251682	Fxa5Bg101568.1	PR16	#N/A	DUF789
chr_5B	10246422	10252267	Fxa5Bg101569.1	PR16	GL118_ARATH	cupin_OxOx
chr_5B	10520245	10521087	Fxa5Bg101603.1	PR16	GL116_ARATH	cupin_OxOx
chr_5B	19916142	19916678	Fxa5Bg102605.1	PR16	GL21_ORYSJ	cupin_RmlC-like
chr_5C	3880847	3881482	Fxa5Cg200585.1	PR16	AB19A_PRUPE	cupin_OxOx
chr_5C	4722767	4725138	Fxa5Cg200732.1	PR16	IPMKB_ARATH	PLN02667
chr_5C	8293651	8297657	Fxa5Cg201257.1	PR16	5FCL_ARATH	PLN02812
chr_5D	8524200	8528215	Fxa5Dg201301.1	PR16	5FCL_ARATH	PLN02812
chr_5D	10008063	10014184	Fxa5Dg201501.1	PR16	#N/A	DUF789
chr_5D	10013927	10014769	Fxa5Dg201502.1	PR16	GL118_ARATH	cupin_OxOx
chr_5D	10020114	10020957	Fxa5Dg201504.1	PR16	GL118_ARATH	cupin_OxOx
chr_5D	10026707	10027550	Fxa5Dg201505.1	PR16	GL118_ARATH	cupin_OxOx
chr_6A	4379196	4384193	Fxa6Ag100755.1	PR16	GL52_ORYSJ	cupin_OxOx
chr_6A	11235866	11236519	Fxa6Ag101798.1	PR16	GL32_ARATH	cupin_OxOx
chr_6A	24801359	24801607	Fxa6Ag103518.1	PR16	auxin-binding protein	#N/A
chr_6B	4161800	4162546	Fxa6Bg100705.1	PR16	GL21_ARATH	cupin_OxOx
chr_6B	11473630	11474292	Fxa6Bg101652.1	PR16	GL32_ARATH	cupin_OxOx
chr_6B	25523755	25524390	Fxa6Bg103087.1	PR16	AB19A_PRUPE	cupin_OxOx
chr_6C	4256598	4263492	Fxa6Cg100677.1	PR16	GL52_ORYSJ	cupin_OxOx
chr_6C	11658637	11659095	Fxa6Cg101612.1	PR16	GL32_ARATH	cupin_OxOx
chr_6C	24368458	24369045	Fxa6Cg102975.1	PR16	AB19A_PRUPE	cupin_OxOx
chr_6D	3832153	3836613	Fxa6Dg100627.1	PR16	GL52_ORYSJ	cupin_OxOx
chr_6D	10774451	10775104	Fxa6Dg101550.1	PR16	GL32_ARATH	cupin_OxOx
chr_6D	23209419	23210054	Fxa6Dg102898.1	PR16	AB19A_PRUPE	cupin_OxOx
chr_6D	24505131	24505379	Fxa6Dg103052.1	PR16	auxin-binding protein	#N/A
chr_7A	4138411	4139034	Fxa7Ag200485.1	PR16	GL93_ORYSJ	cupin_OxOx
chr_7A	4946691	4947335	Fxa7Ag200587.1	PR16	GL32_ARATH	cupin_OxOx
chr_7A	7454256	7454666	Fxa7Ag200889.1	PR16	GL93_ORYSJ	cupin_OxOx
chr_7A	7483715	7487221	Fxa7Ag200896.1	PR16	GL93_ORYSJ	cupin_OxOx
chr_7B	5319978	5320601	Fxa7Bg200531.1	PR16	GL93_ORYSJ	cupin_OxOx
chr_7B	6060191	6060835	Fxa7Bg200625.1	PR16	GL32_ARATH	cupin_OxOx
chr_7B	8336454	8337067	Fxa7Bg200908.1	PR16	GL93_ORYSJ	cupin_OxOx
chr_7B	8362763	8366326	Fxa7Bg200911.1	PR16	GL92_ORYSJ	cupin_OxOx
chr_7C	5191230	5191874	Fxa7Cg100522.1	PR16	GL32_ARATH	cupin_OxOx
chr_7C	7608275	7608902	Fxa7Cg100782.1	PR16	GL93_ORYSJ	cupin_OxOx
chr_7D	5151556	5152179	Fxa7Dg100415.1	PR16	GL93_ORYSJ	cupin_OxOx
chr_7D	6112467	6113111	Fxa7Dg100507.1	PR16	GL32_ARATH	cupin_OxOx
chr_7D	8299151	8299768	Fxa7Dg100761.1	PR16	GL93_ORYSJ	cupin_OxOx
chr_2C	1719190	1719245	unannotated:chr_2C_1719190-1719245_6	PR16	#N/A	cupin_RmlC-like
chr_2C	1719255	1719385	unannotated:chr_2C_1719255-1719385_6	PR16	GL811_ORYSJ	cupin_RmlC-like
chr_2A	3143551	3144533	Fxa2Ag100470.1	PR17	BSP_BOSSE	BSP
chr_2A	3193790	3194612	Fxa2Ag100477.1	PR17	BSP_BOSSE	BSP
chr_2B	2987500	2991551	Fxa2Bg200376.1	PR17	BSP_BOSSE	BSP
chr_2B	3011954	3015080	Fxa2Bg200379.1	PR17	#N/A	BSP
chr_2D	4228742	4229606	Fxa2Dg200460.1	PR17	BSP_BOSSE	BSP
chr_2D	4246346	4247168	Fxa2Dg200462.1	PR17	BSP_BOSSE	BSP
chr_2D	4276565	4277078	Fxa2Dg200464.1	PR17	BSP_BOSSE	BSP
chr_6A	25826123	25827493	Fxa6Ag103678.1	PR17	#N/A	BSP
chr_2A	3159889	3160220	unannotated:chr_2A_3159889-3160220_3	PR17	#N/A	BSP
chr_2A	3197213	3197286	unannotated:chr_2A_3197213-3197286_3	PR17	#N/A	BSP
chr_2A	3197290	3197366	unannotated:chr_2A_3197290-3197366_3	PR17	#N/A	BSP
chr_2D	4230273	4230538	unannotated:chr_2D_4230273-4230538_3	PR17	#N/A	BSP
chr_6B	27888718	27889112	unannotated:chr_6B_27888718-27889112_6	PR17	#N/A	BSP
chr_6C	26750688	26751082	unannotated:chr_6C_26750688-26751082_6	PR17	#N/A	BSP
chr_1A	20438235	20439710	Fxa1Ag102878.1	PR18	BBLD2_TOBAC	FAD_binding_4
chr_1A	20452500	20453975	Fxa1Ag102881.1	PR18	BBLD2_TOBAC	FAD_binding_4
chr_1A	20495349	20496824	Fxa1Ag102888.1	PR18	BBLD2_TOBAC	FAD_binding_4
chr_1B	2217856	2219409	Fxa1Bg200413.1	PR18	STOX_BERWI	FAD_binding_4
chr_2A	138740	140563	Fxa2Ag100015.1	PR18	BBLD2_TOBAC	FAD_binding_4
chr_2B	406748	408837	Fxa2Bg200041.1	PR18	BBLD2_TOBAC	FAD_binding_4
chr_3A	6290328	6291923	Fxa3Ag101015.1	PR18	BBE22_ARATH	BBE
chr_3A	6292958	6293574	Fxa3Ag101016.1	PR18	STOX_ARGME	BBE
chr_3A	6294422	6296056	Fxa3Ag101017.1	PR18	BBE13_ARATH	GlcD
chr_3A	6309057	6346230	Fxa3Ag101020.1	PR18	BBE13_ARATH	FAD_binding_4
chr_3A	6356426	6356677	Fxa3Ag101023.1	PR18	BBE	#N/A
chr_3A	6357799	6358177	Fxa3Ag101024.1	PR18	BBE	#N/A
chr_3A	6362807	6364462	Fxa3Ag101026.1	PR18	BBE	#N/A
chr_3A	6364954	6377074	Fxa3Ag101027.1	PR18	BBE17_ARATH	GlcD
chr_3A	6394176	6395777	Fxa3Ag101032.1	PR18	BBE17_ARATH	GlcD
chr_3A	6518361	6519965	Fxa3Ag101054.1	PR18	BBE8_ARATH	GlcD
chr_3B	5468382	5488507	Fxa3Bg200904.1	PR18	BBE15_ARATH	GlcD
chr_3B	5473406	5474696	Fxa3Bg200905.1	PR18	BBE13_ARATH	BBE
chr_3B	5497630	5499210	Fxa3Bg200907.1	PR18	STOX_BERWI	GlcD
chr_3B	5503340	5508964	Fxa3Bg200908.1	PR18	STOX_BERWI	BBE
chr_3B	5507777	5508550	Fxa3Bg200909.1	PR18	BBE	#N/A
chr_3B	5508711	5509006	Fxa3Bg200910.1	PR18	BBE	#N/A
chr_3B	5519711	5520485	Fxa3Bg200911.1	PR18	BBE	#N/A
chr_3B	5520646	5520941	Fxa3Bg200912.1	PR18	BBE	#N/A
chr_3B	5524655	5525024	Fxa3Bg200914.1	PR18	BBE	#N/A
chr_3B	5531733	5533400	Fxa3Bg200916.1	PR18	BBE	#N/A
chr_3B	5537337	5539019	Fxa3Bg200917.1	PR18	BBE17_ARATH	GlcD
chr_3B	5547936	5548541	Fxa3Bg200919.1	PR18	STOX_BERWI	FAD_binding_4
chr_3B	5666530	5668134	Fxa3Bg200940.1	PR18	BBE8_ARATH	GlcD
chr_3C	5576341	5587104	Fxa3Cg100893.1	PR18	BBE15_ARATH	GlcD
chr_3C	5580458	5582092	Fxa3Cg100894.1	PR18	BBE13_ARATH	GlcD
chr_3C	5594908	5599935	Fxa3Cg100895.1	PR18	BBE15_ARATH	GlcD
chr_3C	5611417	5612991	Fxa3Cg100897.1	PR18	STOX_BERWI	GlcD
chr_3C	5616875	5622543	Fxa3Cg100898.1	PR18	BBE21_ARATH	FAD_binding_4
chr_3C	5621355	5622129	Fxa3Cg100899.1	PR18	BBE	#N/A
chr_3C	5645536	5645981	Fxa3Cg100902.1	PR18	BBE	#N/A
chr_3C	5646934	5647254	Fxa3Cg100903.1	PR18	BBE	#N/A
chr_3C	5651827	5652211	Fxa3Cg100905.1	PR18	BBE	#N/A
chr_3C	5656755	5658417	Fxa3Cg100907.1	PR18	BBE	#N/A
chr_3C	5661204	5674643	Fxa3Cg100908.1	PR18	BBE17_ARATH	GlcD
chr_3C	5831972	5834198	Fxa3Cg100937.1	PR18	BBE8_ARATH	GlcD
chr_3C	5860975	5862579	Fxa3Cg100939.1	PR18	BBE8_ARATH	GlcD
chr_3D	5289135	5290730	Fxa3Dg200835.1	PR18	BBE22_ARATH	GlcD
chr_3D	5291961	5292543	Fxa3Dg200836.1	PR18	STOX_ARGME	BBE
chr_3D	5296403	5298024	Fxa3Dg200838.1	PR18	BBE13_ARATH	GlcD
chr_3D	5309666	5310839	Fxa3Dg200843.1	PR18	BBE13_ARATH	BBE
chr_3D	5321950	5329713	Fxa3Dg200844.1	PR18	BBE15_ARATH	GlcD
chr_3D	5361527	5363107	Fxa3Dg200845.1	PR18	STOX_BERWI	GlcD
chr_3D	5383265	5384881	Fxa3Dg200847.1	PR18	BBE17_ARATH	GlcD
chr_1A	20467966	20468330	unannotated:chr_1A_20467966-20468330_6	PR18	BBLD1_TOBAC	FAD_binding_4
chr_1A	20482227	20482603	unannotated:chr_1A_20482227-20482603_6	PR18	BBLD1_TOBAC	FAD_binding_4
chr_1A	1595115	1597646	Fxa1Ag100274.2	PR2	E1314_ARATH	Glyco_hydro
chr_1A	2716852	2719971	Fxa1Ag100477.1	PR2	E138_ARATH	Glyco_hydro
chr_1A	3210110	3212883	Fxa1Ag100568.1	PR2	E1313_ARATH	Glyco_hydro
chr_1A	4223345	4223880	Fxa1Ag100758.1	PR2	BG4_ARATH	Glyco_hydro
chr_1A	4223932	4224249	Fxa1Ag100759.1	PR2	BG5_ARATH	Glyco_hydro
chr_1A	4224260	4227142	Fxa1Ag100760.1	PR2	BG4_ARATH	Glyco_hydro
chr_1A	4909588	4911472	Fxa1Ag100877.1	PR2	E135_ARATH	Glyco_hydro
chr_1A	9399218	9400601	Fxa1Ag101594.1	PR2	E1313_ARATH	X8
chr_1A	13242129	13243831	Fxa1Ag102106.1	PR2	E138_ARATH	Glyco_hydro
chr_1A	13244749	13246373	Fxa1Ag102107.1	PR2	E138_ARATH	Glyco_hydro
chr_1A	13933782	13934348	Fxa1Ag102194.1	PR2	GUB2_HORVU	Glyco_hydro
chr_1A	18112135	18115922	Fxa1Ag102683.1	PR2	E132_ARATH	Glyco_hydro
chr_1B	1410463	1413002	Fxa1Bg200265.2	PR2	E1314_ARATH	Glyco_hydro
chr_1B	2484019	2486583	Fxa1Bg200470.1	PR2	E138_ARATH	Glyco_hydro
chr_1B	2905976	2909776	Fxa1Bg200546.1	PR2	E1313_ARATH	Glyco_hydro
chr_1B	3817265	3818403	Fxa1Bg200720.1	PR2	BG4_ARATH	Glyco_hydro
chr_1B	4481542	4483434	Fxa1Bg200823.1	PR2	E135_ARATH	Glyco_hydro
chr_1B	8877221	8878599	Fxa1Bg201472.1	PR2	E133_ARATH	X8
chr_1B	13158281	13159963	Fxa1Bg201988.1	PR2	E138_ARATH	Glyco_hydro
chr_1B	13160896	13162524	Fxa1Bg201989.1	PR2	E138_ARATH	Glyco_hydro
chr_1B	23210389	23214146	Fxa1Bg202766.1	PR2	E132_ARATH	Glyco_hydro
chr_1B	25347562	25350078	Fxa1Bg202889.1	PR2	E138_ARATH	Glyco_hydro
chr_1C	1410905	1414164	Fxa1Cg100237.3	PR2	E1314_ARATH	Glyco_hydro
chr_1C	2542409	2544817	Fxa1Cg100445.1	PR2	E138_ARATH	Glyco_hydro
chr_1C	2992566	2996334	Fxa1Cg100525.1	PR2	E1313_ARATH	Glyco_hydro
chr_1C	4086950	4088612	Fxa1Cg100729.1	PR2	BG5_ARATH	Glyco_hydro
chr_1C	4095626	4098045	Fxa1Cg100730.1	PR2	BG5_ARATH	Glyco_hydro
chr_1C	4713529	4715413	Fxa1Cg100834.1	PR2	E135_ARATH	Glyco_hydro
chr_1C	9686388	9687769	Fxa1Cg101560.1	PR2	E133_ARATH	X8
chr_1C	14462041	14462531	Fxa1Cg102102.1	PR2	E138_ARATH	Glyco_hydro
chr_1C	14463195	14465753	Fxa1Cg102103.1	PR2	E138_ARATH	Glyco_hydro
chr_1C	25230487	25233943	Fxa1Cg103023.1	PR2	E138_ARATH	Glyco_hydro
chr_1D	1571775	1574311	Fxa1Dg200248.1	PR2	E1314_ARATH	Glyco_hydro
chr_1D	3018092	3020721	Fxa1Dg200499.1	PR2	E1313_ARATH	Glyco_hydro
chr_1D	3940106	3941432	Fxa1Dg200667.1	PR2	E13B_HEVBR	Glyco_hydro
chr_1D	3941580	3943721	Fxa1Dg200668.1	PR2	BG5_ARATH	Glyco_hydro
chr_1D	4522200	4524084	Fxa1Dg200754.1	PR2	E135_ARATH	Glyco_hydro
chr_1D	9296135	9297516	Fxa1Dg201455.1	PR2	E133_ARATH	X8
chr_1D	21730271	21732774	Fxa1Dg202626.1	PR2	E138_ARATH	Glyco_hydro
chr_1D	24315017	24317500	Fxa1Dg202811.1	PR2	E138_ARATH	Glyco_hydro
chr_1D	25700684	25704807	Fxa1Dg202924.1	PR2	E132_ARATH	Glyco_hydro
chr_2A	6432841	6436003	Fxa2Ag100846.1	PR2	E137_ARATH	Glyco_hydro
chr_2A	14894164	14896219	Fxa2Ag101877.1	PR2	EA6_ARATH	Glyco_hydro
chr_2A	14917367	14918829	Fxa2Ag101879.1	PR2	EA6_ARATH	Glyco_hydro
chr_2A	21947755	21949880	Fxa2Ag103024.1	PR2	E135_ARATH	Glyco_hydro
chr_2A	21968154	21970295	Fxa2Ag103028.1	PR2	E135_ARATH	Glyco_hydro
chr_2A	26738498	26740365	Fxa2Ag103885.1	PR2	E137_ARATH	Glyco_hydro
chr_2B	6138713	6142219	Fxa2Bg200710.1	PR2	E137_ARATH	Glyco_hydro
chr_2B	14797284	14798308	Fxa2Bg201690.1	PR2	EA6_ARATH	Glyco_hydro
chr_2B	14798393	14809084	Fxa2Bg201691.1	PR2	EA6_ARATH	Glyco_hydro
chr_2B	14812000	14813452	Fxa2Bg201692.1	PR2	EA6_ARATH	Glyco_hydro
chr_2B	22322930	22325018	Fxa2Bg202849.1	PR2	E135_ARATH	Glyco_hydro
chr_2C	891633	893476	Fxa2Cg200158.1	PR2	E137_ARATH	Glyco_hydro
chr_2C	6797843	6799983	Fxa2Cg201049.1	PR2	E135_ARATH	Glyco_hydro
chr_2C	13119092	13122638	Fxa2Cg201815.1	PR2	E137_ARATH	Glyco_hydro
chr_2C	20780593	20781584	Fxa2Cg202662.1	PR2	EA6_ARATH	Glyco_hydro
chr_2C	20791087	20792852	Fxa2Cg202663.1	PR2	EA6_ARATH	Glyco_hydro
chr_2D	22106964	22109099	Fxa2Dg202617.1	PR2	E135_ARATH	Glyco_hydro
chr_2D	27216987	27218836	Fxa2Dg203463.1	PR2	E137_ARATH	Glyco_hydro
chr_3A	108524	111428	Fxa3Ag100021.1	PR2	E135_ARATH	Glyco_hydro
chr_3A	997626	1000018	Fxa3Ag100164.1	PR2	E131_ARATH	Glyco_hydro
chr_3A	3247520	3248915	Fxa3Ag100509.1	PR2	E1311_ARATH	Glyco_hydro
chr_3A	6496602	6497126	Fxa3Ag101050.1	PR2	E13B_VITVI	Glyco_hydro
chr_3A	14713009	14714989	Fxa3Ag102226.1	PR2	E1313_ARATH	Glyco_hydro
chr_3A	15901679	15902907	Fxa3Ag102387.1	PR2	E1314_ARATH	Glyco_hydro
chr_3A	19140958	19142388	Fxa3Ag102739.1	PR2	E13B_VITVI	Glyco_hydro
chr_3A	19153959	19154672	Fxa3Ag102742.1	PR2	E13B_VITVI	Glyco_hydro
chr_3A	25109793	25111735	Fxa3Ag103398.1	PR2	E13B_WHEAT	Glyco_hydro
chr_3A	27152171	27154508	Fxa3Ag103689.1	PR2	E139_ARATH	Glyco_hydro
chr_3A	30612851	30619510	Fxa3Ag104259.1	PR2	E134_ARATH	Glyco_hydro
chr_3B	118015	120916	Fxa3Bg200023.1	PR2	E135_ARATH	Glyco_hydro
chr_3B	775971	778340	Fxa3Bg200167.1	PR2	E131_ARATH	Glyco_hydro
chr_3B	2674174	2675585	Fxa3Bg200481.1	PR2	E1311_ARATH	Glyco_hydro
chr_3B	14454502	14456109	Fxa3Bg202022.1	PR2	E1313_ARATH	Glyco_hydro
chr_3B	16014289	16017255	Fxa3Bg202178.1	PR2	E1314_ARATH	Glyco_hydro
chr_3B	18653138	18654269	Fxa3Bg202425.1	PR2	E13B_VITVI	Glyco_hydro
chr_3B	18668307	18669593	Fxa3Bg202427.1	PR2	E13B_VITVI	Glyco_hydro
chr_3B	25194579	25203112	Fxa3Bg203085.1	PR2	E13B_WHEAT	Glyco_hydro
chr_3B	27573301	27575614	Fxa3Bg203365.1	PR2	E139_ARATH	Glyco_hydro
chr_3B	30764215	30770853	Fxa3Bg203832.1	PR2	E134_ARATH	Glyco_hydro
chr_3C	131032	133934	Fxa3Cg100022.1	PR2	E135_ARATH	Glyco_hydro
chr_3C	928189	930571	Fxa3Cg100156.1	PR2	E131_ARATH	Glyco_hydro
chr_3C	2873613	2875016	Fxa3Cg100463.1	PR2	E1311_ARATH	Glyco_hydro
chr_3C	15260635	15262464	Fxa3Cg102100.1	PR2	E1314_ARATH	Glyco_hydro
chr_3C	18010550	18011837	Fxa3Cg102355.1	PR2	E13B_VITVI	Glyco_hydro
chr_3C	24882344	24884364	Fxa3Cg103016.1	PR2	E13B_WHEAT	Glyco_hydro
chr_3C	27270857	27273348	Fxa3Cg103300.1	PR2	E139_ARATH	Glyco_hydro
chr_3C	30578866	30585480	Fxa3Cg103766.1	PR2	E134_ARATH	Glyco_hydro
chr_3D	164089	167008	Fxa3Dg200018.1	PR2	E135_ARATH	Glyco_hydro
chr_3D	797555	799890	Fxa3Dg200136.2	PR2	glucan endo 1,3-beta-glucosidase	#N/A
chr_3D	2761334	2762752	Fxa3Dg200451.1	PR2	E1311_ARATH	Glyco_hydro
chr_3D	3531327	3532123	Fxa3Dg200575.1	PR2	E132_ARATH	Glyco_hydro
chr_3D	3531549	3532147	Fxa3Dg200576.1	PR2	glucan endo 1,3-beta-glucosidase	#N/A
chr_3D	15410647	15412350	Fxa3Dg202068.1	PR2	E1314_ARATH	Glyco_hydro
chr_3D	20963928	20964803	Fxa3Dg202624.1	PR2	glucan endo 1,3-beta-glucosidase	#N/A
chr_3D	24190289	24192296	Fxa3Dg202938.1	PR2	E13B_WHEAT	Glyco_hydro
chr_3D	26284998	26287345	Fxa3Dg203164.1	PR2	E139_ARATH	Glyco_hydro
chr_3D	29503521	29510131	Fxa3Dg203634.1	PR2	E134_ARATH	Glyco_hydro
chr_4A	65814	68648	Fxa4Ag100007.1	PR2	E136_ARATH	Glyco_hydro
chr_4A	11643352	11644739	Fxa4Ag101282.1	PR2	EA6_ARATH	Glyco_hydro
chr_4A	12323035	12323828	Fxa4Ag101382.1	PR2	glucan endo 1,3-beta-glucosidase	#N/A
chr_4A	12323212	12324231	Fxa4Ag101383.1	PR2	glucan endo 1,3-beta-glucosidase	#N/A
chr_4A	16758065	16759457	Fxa4Ag101943.1	PR2	E13B_HEVBR	Glyco_hydro_17
chr_4A	22568871	22570331	Fxa4Ag102844.1	PR2	E1311_ARATH	Glyco_hydro
chr_4A	22586592	22588582	Fxa4Ag102847.1	PR2	E1314_ARATH	Glyco_hydro
chr_4A	22768318	22769773	Fxa4Ag102889.1	PR2	E13B_VITVI	Glyco_hydro
chr_4A	24653566	24656932	Fxa4Ag103230.1	PR2	E133_ARATH	Glyco_hydro
chr_4A	24853226	24854275	Fxa4Ag103269.1	PR2	BGNEM_ARATH	Glyco_hydro
chr_4B	51064	53899	Fxa4Bg100005.1	PR2	E136_ARATH	Glyco_hydro
chr_4B	21059030	21060386	Fxa4Bg101880.1	PR2	E13B_HEVBR	Glyco_hydro_17
chr_4B	26890247	26891638	Fxa4Bg102742.1	PR2	E1311_ARATH	Glyco_hydro
chr_4B	28779929	28783364	Fxa4Bg103064.3	PR2	E133_ARATH	Glyco_hydro
chr_4B	28957671	28958720	Fxa4Bg103097.1	PR2	BGNEM_ARATH	Glyco_hydro
chr_4C	50810	53742	Fxa4Cg200004.1	PR2	E136_ARATH	Glyco_hydro
chr_4C	12088317	12089702	Fxa4Cg201108.1	PR2	EA6_ARATH	Glyco_hydro
chr_4C	22896009	22897373	Fxa4Cg202506.1	PR2	E1311_ARATH	Glyco_hydro
chr_4C	22925390	22927055	Fxa4Cg202511.1	PR2	E1314_ARATH	Glyco_hydro
chr_4C	24939924	24943339	Fxa4Cg202845.1	PR2	E133_ARATH	Glyco_hydro
chr_4C	25145373	25146422	Fxa4Cg202881.1	PR2	BGNEM_ARATH	Glyco_hydro
chr_4D	54146	56982	Fxa4Dg100004.1	PR2	E136_ARATH	Glyco_hydro
chr_4D	20982799	20984031	Fxa4Dg102293.1	PR2	E1311_ARATH	Glyco_hydro
chr_4D	20998641	21001198	Fxa4Dg102296.1	PR2	E1311_ARATH	Glyco_hydro
chr_4D	23181474	23184806	Fxa4Dg102641.1	PR2	E133_ARATH	Glyco_hydro
chr_4D	23346892	23347319	Fxa4Dg102676.1	PR2	E13J_TOBAC	Glyco_hydro
chr_5A	3456211	3465623	Fxa5Ag200561.1	PR2	E13B_PRUPE	Glyco_hydro
chr_5A	15147544	15149397	Fxa5Ag202332.1	PR2	E1312_ARATH	Glyco_hydro
chr_5B	3376459	3377654	Fxa5Bg100535.1	PR2	E13B_PRUPE	Glyco_hydro
chr_5B	5565644	5568963	Fxa5Bg100862.1	PR2	E1311_ARATH	Glyco_hydro
chr_5B	16736357	16738378	Fxa5Bg102256.1	PR2	ALL9_OLEEU	Glyco_hydro
chr_5C	5049340	5064267	Fxa5Cg200783.1	PR2	E1311_ARATH	Glyco_hydro
chr_5C	15747177	15750251	Fxa5Cg202128.1	PR2	E1312_ARATH	X8
chr_5D	5158904	5169996	Fxa5Dg200825.1	PR2	E1311_ARATH	Glyco_hydro
chr_5D	13487834	13488509	Fxa5Dg201936.1	PR2	E1311_ARATH	Glyco_hydro
chr_5D	15654470	15656361	Fxa5Dg202181.1	PR2	E1312_ARATH	Glyco_hydro
chr_6A	15831032	15832213	Fxa6Ag102400.1	PR2	E13B_PRUPE	Glyco_hydro
chr_6A	20027100	20028860	Fxa6Ag102875.1	PR2	E1314_ARATH	Glyco_hydro
chr_6A	25206739	25207918	Fxa6Ag103580.1	PR2	E13B_PRUPE	Glyco_hydro
chr_6A	25210957	25211403	Fxa6Ag103581.1	PR2	GUB_NICPL	Glyco_hydro
chr_6A	28157799	28159343	Fxa6Ag104039.1	PR2	E133_ARATH	Glyco_hydro
chr_6B	21548367	21550139	Fxa6Bg102633.1	PR2	E1314_ARATH	Glyco_hydro
chr_6B	30135350	30137199	Fxa6Bg103698.1	PR2	E133_ARATH	Glyco_hydro
chr_6C	15972573	15973786	Fxa6Cg102087.1	PR2	E13A_SOYBN	Glyco_hydro
chr_6C	15999531	16000726	Fxa6Cg102089.1	PR2	E13B_PRUPE	Glyco_hydro
chr_6C	20526755	20528517	Fxa6Cg102532.1	PR2	E1314_ARATH	Glyco_hydro
chr_6C	26079014	26080189	Fxa6Cg103192.1	PR2	E13B_PRUPE	Glyco_hydro
chr_6C	26082532	26082969	Fxa6Cg103193.1	PR2	E13A_ARATH	Glyco_hydro
chr_6C	28845649	28847146	Fxa6Cg103590.1	PR2	E133_ARATH	Glyco_hydro
chr_6D	15679839	15681032	Fxa6Dg102069.1	PR2	E13B_PRUPE	Glyco_hydro
chr_6D	19578005	19579774	Fxa6Dg102489.1	PR2	E1314_ARATH	Glyco_hydro
chr_6D	24929968	24930384	Fxa6Dg103104.1	PR2	glucan endo 1,3-beta-glucosidase	#N/A
chr_6D	24932752	24937203	Fxa6Dg103105.1	PR2	E13B_PRUPE	Glyco_hydro
chr_6D	27511001	27512807	Fxa6Dg103492.1	PR2	E133_ARATH	Glyco_hydro
chr_7A	16316531	16318754	Fxa7Ag202220.1	PR2	E13B_WHEAT	Glyco_hydro
chr_7A	16329476	16337140	Fxa7Ag202223.1	PR2	E13B_WHEAT	Glyco_hydro
chr_7A	16983075	16983375	Fxa7Ag202335.1	PR2	glucan endo 1,3-beta-glucosidase	#N/A
chr_7A	16993414	16994212	Fxa7Ag202338.1	PR2	E132_ARATH	Glyco_hydro
chr_7A	21488148	21491849	Fxa7Ag203153.1	PR2	E13B_WHEAT	Glyco_hydro
chr_7B	3432273	3433289	Fxa7Bg200341.1	PR2	BG5_ARATH	Glyco_hydro
chr_7B	17401364	17403779	Fxa7Bg202124.1	PR2	E13B_WHEAT	Glyco_hydro
chr_7B	17424748	17426259	Fxa7Bg202127.1	PR2	E13B_WHEAT	Glyco_hydro
chr_7B	18066236	18066536	Fxa7Bg202248.1	PR2	glucan endo 1,3-beta-glucosidase	#N/A
chr_7B	22381133	22384774	Fxa7Bg202988.1	PR2	E13B_WHEAT	Glyco_hydro
chr_7C	17267245	17269446	Fxa7Cg102079.1	PR2	E13B_WHEAT	Glyco_hydro
chr_7C	17282700	17284210	Fxa7Cg102081.1	PR2	E13B_WHEAT	Glyco_hydro
chr_7D	17114506	17116907	Fxa7Dg101925.1	PR2	E13B_WHEAT	Glyco_hydro
chr_7D	17891881	17892181	Fxa7Dg102047.1	PR2	glucan endo 1,3-beta-glucosidase	#N/A
chr_7D	17893963	17894555	Fxa7Dg102048.1	PR2	glucan endo 1,3-beta-glucosidase	#N/A
chr_1A	5540760	5541834	Fxa1Ag100971.1	PR3	CHIX_PEA	Glyco_hydro_19
chr_1A	5543348	5554528	Fxa1Ag100972.1	PR3	CHIX_PEA	Glyco_hydro_19
chr_1A	16296292	16300278	Fxa1Ag102473.1	PR3	CHI10_ORYSJ	Glyco_hydro_19
chr_1B	5059745	5067744	Fxa1Bg200909.1	PR3	CHIX_PEA	Glyco_hydro_19
chr_1B	16687031	16689594	Fxa1Bg202343.1	PR3	CHI10_ORYSJ	Glyco_hydro_19
chr_1C	5232287	5233364	Fxa1Cg100919.1	PR3	CHIX_PEA	Glyco_hydro_19
chr_1C	5242748	5246017	Fxa1Cg100920.1	PR3	CHIX_PEA	Glyco_hydro_19
chr_1C	18233191	18234523	Fxa1Cg102516.1	PR3	CHI10_ORYSJ	Glyco_hydro_19
chr_1D	5122686	5123528	Fxa1Dg200848.1	PR3	CHIX_PEA	Glyco_hydro_19
chr_1D	5124610	5128379	Fxa1Dg200849.1	PR3	CHIX_PEA	Glyco_hydro_19
chr_1D	17390514	17391801	Fxa1Dg202299.1	PR3	CHI10_ORYSJ	Glyco_hydro_19
chr_2A	13500137	13501561	Fxa2Ag101657.1	PR3	CHI5_PHAVU	Glyco_hydro_19
chr_2B	13252760	13254188	Fxa2Bg201460.1	PR3	CHI5_PHAVU	Glyco_hydro_19
chr_2D	13303224	13304693	Fxa2Dg201423.1	PR3	CHI5_PHAVU	Glyco_hydro_19
chr_4A	9099717	9100680	Fxa4Ag100974.1	PR3	CHI5_ARATH	chitinase_GH19
chr_4A	9115792	9116580	Fxa4Ag100976.1	PR3	CHI5_ARATH	chitinase_GH19
chr_4A	9137787	9138750	Fxa4Ag100980.1	PR3	CHI5_ARATH	chitinase_GH19
chr_4A	10608725	10610867	Fxa4Ag101145.1	PR3	CTL1_ARATH	chitinase_GH19
chr_4A	16655702	16657424	Fxa4Ag101928.1	PR3	CTL2_ARATH	chitinase_GH19
chr_4B	13816425	13816850	Fxa4Bg101048.1	PR3	CHI5_ARATH	chitinase_GH19
chr_4B	13833176	13834141	Fxa4Bg101053.1	PR3	CHI5_ARATH	chitinase_GH19
chr_4B	14926484	14928571	Fxa4Bg101163.1	PR3	CTL1_ARATH	chitinase_GH19
chr_4B	20960156	20962132	Fxa4Bg101867.1	PR3	CTL2_ARATH	chitinase_GH19
chr_4C	5672023	5672812	Fxa4Cg200577.1	PR3	CHI5_ARATH	chitinase_GH19
chr_4C	5713347	5714309	Fxa4Cg200580.1	PR3	CHI5_ARATH	chitinase_GH19
chr_4C	9787808	9789337	Fxa4Cg200892.1	PR3	CHI4_PHAVU	Lyz-like
chr_4C	16773603	16775485	Fxa4Cg201637.1	PR3	CTL2_ARATH	chitinase_GH19
chr_4D	8651204	8652843	Fxa4Dg100808.1	PR3	CHI5_ARATH	chitinase_GH19
chr_4D	8883704	8885837	Fxa4Dg100834.1	PR3	CTL1_ARATH	chitinase_GH19
chr_4D	14989923	14991757	Fxa4Dg101479.1	PR3	CTL2_ARATH	chitinase_GH19
chr_5A	16476688	16479332	Fxa5Ag202498.1	PR3	CHI10_ORYSJ	Glyco_hydro_19
chr_5B	18130058	18131417	Fxa5Bg102410.1	PR3	CHI10_ORYSJ	Glyco_hydro_19
chr_5C	16979946	16981328	Fxa5Cg202258.1	PR3	CHI10_ORYSJ	Glyco_hydro_19
chr_5D	16759860	16761361	Fxa5Dg202320.1	PR3	CHI10_ORYSJ	Glyco_hydro_19
chr_6D	22917766	22919695	Fxa6Dg102872.1	PR3	endochitinase	#N/A
chr_4B	13814744	13815012	unannotated:chr_4B_13814744-13815012_3	PR3	CHI5_ARATH	Lyz-like
chr_3A	3512625	3513062	Fxa3Ag100552.1	PR4	PR4B_TOBAC	DPBB_barwin-like
chr_3A	16769812	16770201	Fxa3Ag102499.1	PR4	PR4B_TOBAC	DPBB_barwin-like
chr_3B	2905493	2905930	Fxa3Bg200514.1	PR4	PR4B_TOBAC	DPBB_barwin-like
chr_6B	1439851	1444945	Fxa6Bg100238.1	PR4	PR4B_TOBAC	DPBB_RlpA_EXP_N-like
chr_6C	1429514	1435421	Fxa6Cg100242.1	PR4	PR4B_TOBAC	DPBB_RlpA_EXP_N-like
chr_3D	16460724	16460941	unannotated:chr_3D_16460724-16460941_4	PR4	PR4_PRUPE	DPBB_RlpA_EXP_N-like
chr_3D	16460785	16460966	unannotated:chr_3D_16460785-16460966_6	PR4	PRP2_SOLLC	DPBB_RlpA_EXP_N-like
chr_6A	1678974	1679044	unannotated:chr_6A_1678974-1679044_6	PR4	WIN1_SOLTU	DPBB_RlpA_EXP_N-like
chr_6D	1300097	1300281	unannotated:chr_6D_1300097-1300281_6	PR4	PR4_PRUPE	DPBB_RlpA_EXP_N-like
chr_6D	1300342	1300517	unannotated:chr_6D_1300342-1300517_5	PR4	#N/A	DPBB_RlpA_EXP_N-like
chr_1A	6112998	6124234	Fxa1Ag101076.1	PR5	THLP1_ARATH	TLP-PA
chr_1B	5562628	5572251	Fxa1Bg201005.1	PR5	THLP1_ARATH	TLP-PA
chr_1C	5827736	5836242	Fxa1Cg101019.1	PR5	THLP1_ARATH	TLP-PA
chr_1D	5673969	5684577	Fxa1Dg200952.1	PR5	THLP1_ARATH	TLP-PA
chr_2A	1070248	1071841	Fxa2Ag100152.1	PR5	THLP1_ARATH	GH64-TLP-SF
chr_2A	1082144	1084208	Fxa2Ag100154.1	PR5	TP1B_MALDO	Thaumatin
chr_2A	19616890	19620833	Fxa2Ag102647.1	PR5	CRJ35_CRYJA	TLP-PA
chr_2A	25932494	25939870	Fxa2Ag103735.1	PR5	THLP1_ARATH	TLP-PA
chr_2A	26940409	26941261	Fxa2Ag103924.1	PR5	CRJ35_CRYJA	TLP-PA
chr_2B	951554	965927	Fxa2Bg200107.1	PR5	THLP1_ARATH	TLP-PA
chr_2B	25985489	25989819	Fxa2Bg203489.1	PR5	PR5K_ARATH	TLP-PA
chr_2B	26861449	26862320	Fxa2Bg203676.1	PR5	PR5_ARATH	Thaumatin
chr_2C	711081	711923	Fxa2Cg200121.1	PR5	PR5_ARATH	GH64-TLP-SF
chr_2C	1683351	1691116	Fxa2Cg200322.1	PR5	THLP1_ARATH	Thaumatin
chr_2C	8905792	8915511	Fxa2Cg201342.1	PR5	THLP1_ARATH	Thaumatin
chr_2C	26149136	26150469	Fxa2Cg203404.1	PR5	CRJ35_CRYJA	TLP-PA
chr_2D	1098579	1100218	Fxa2Dg200117.1	PR5	THLP1_ARATH	TLP-PA
chr_2D	1114751	1116717	Fxa2Dg200120.1	PR5	THLP1_ARATH	Thaumatin
chr_2D	21172103	21179666	Fxa2Dg202476.1	PR5	CRJ35_CRYJA	TLP-PA
chr_2D	26281408	26290303	Fxa2Dg203292.1	PR5	THLP1_ARATH	Thaumatin
chr_2D	27437125	27437980	Fxa2Dg203504.1	PR5	CRJ35_CRYJA	TLP-PA
chr_3A	24769247	24769993	Fxa3Ag103349.1	PR5	OLP1_SOLLC	TLP-PA
chr_3B	24706297	24707043	Fxa3Bg203030.1	PR5	OLP1_SOLLC	TLP-PA
chr_4A	2758781	2759859	Fxa4Ag100336.1	PR5	TLP1_PRUPE	TLP-PA
chr_4B	3499536	3500378	Fxa4Bg100334.1	PR5	TLP1_PRUPE	TLP-PA
chr_4C	3111877	3112918	Fxa4Cg200300.1	PR5	TLP1_PRUPE	TLP-PA
chr_5A	1124571	1132672	Fxa5Ag200169.1	PR5	OSL3_ARATH	THN
chr_5A	3464864	3468995	Fxa5Ag200562.1	PR5	TLP_PRUAV	TLP-PA
chr_5A	8976900	8977806	Fxa5Ag201527.1	PR5	TLPH_ARATH	TLP-PA
chr_5B	1109588	1114034	Fxa5Bg100176.1	PR5	OSL3_ARATH	THN
chr_5B	3395466	3398599	Fxa5Bg100536.1	PR5	TLP_PRUAV	TLP-PA
chr_5B	9589819	9590706	Fxa5Bg101475.1	PR5	TLPH_ARATH	TLP-PA
chr_5C	955839	957515	Fxa5Cg200149.1	PR5	TLP_ACTCC	GH64-TLP-SF
chr_5C	958085	958765	Fxa5Cg200150.1	PR5	TLP_ACTCC	GH64-TLP-SF
chr_5C	959922	960668	Fxa5Cg200151.1	PR5	OSL3_ARATH	THN
chr_5C	8981121	8981996	Fxa5Cg201365.1	PR5	TLPH_ARATH	TLP-PA
chr_5D	9379770	9380657	Fxa5Dg201423.1	PR5	TLPH_ARATH	TLP-PA
chr_6A	2961295	2962204	Fxa6Ag100506.1	PR5	TLP_PRUAV	TLP-PA
chr_6A	7428855	7429675	Fxa6Ag101251.1	PR5	TLPH_ORYSJ	Thaumatin
chr_6A	10778567	10779631	Fxa6Ag101738.1	PR5	TP1A_MALDO	TLP-PA
chr_6A	31888350	31890626	Fxa6Ag104718.1	PR5	TLPH_ARATH	TLP-PA
chr_6B	7164325	7165145	Fxa6Bg101114.1	PR5	TLPH_ORYSJ	Thaumatin
chr_6B	33759152	33760850	Fxa6Bg104290.1	PR5	TLPH_ARATH	TLP-PA
chr_6C	10144341	10145351	Fxa6Cg101468.1	PR5	TP1A_MALDO	TLP-PA
chr_6C	32644724	32645611	Fxa6Cg104196.1	PR5	TLPH_ARATH	TLP-PA
chr_6D	6446592	6447412	Fxa6Dg100995.1	PR5	TLPH_ORYSJ	Thaumatin
chr_6D	9426167	9427183	Fxa6Dg101386.1	PR5	TP1A_MALDO	TLP-PA
chr_6D	15667897	15668547	Fxa6Dg102067.1	PR5	TLP_PRUAV	TLP-PA
chr_6D	31155421	31156308	Fxa6Dg104105.1	PR5	TLPH_ARATH	TLP-PA
chr_7A	16563731	16565130	Fxa7Ag202260.1	PR5	TLPH_ORYSJ	Thaumatin
chr_7A	17215953	17229568	Fxa7Ag202371.1	PR5	PR5K_ARATH	Thaumatin
chr_7A	17244766	17253175	Fxa7Ag202374.1	PR5	PR5K_ARATH	Thaumatin
chr_7A	21993554	21994741	Fxa7Ag203258.1	PR5	THLP1_ARATH	TLP-PA
chr_7B	17661729	17663112	Fxa7Bg202168.1	PR5	TLPH_ORYSJ	Thaumatin
chr_7B	18322798	18333393	Fxa7Bg202286.1	PR5	PR5K_ARATH	Thaumatin
chr_7B	18328989	18329979	Fxa7Bg202287.1	PR5	#N/A	RNase_H_like
chr_7B	22800886	22802075	Fxa7Bg203081.1	PR5	THLP1_ARATH	TLP-PA
chr_7C	17487278	17488852	Fxa7Cg102113.1	PR5	TLPH_ORYSJ	Thaumatin
chr_7C	18194184	18210190	Fxa7Cg102220.1	PR5	PR5K_ARATH	Thaumatin
chr_7C	22410418	22411617	Fxa7Cg102993.1	PR5	#N/A	Thaumatin
chr_7D	17351095	17352494	Fxa7Dg101961.1	PR5	TLPH_ORYSJ	Thaumatin
chr_7D	18129360	18132893	Fxa7Dg102085.1	PR5	PR5K_ARATH	STKc_IRAK
chr_7D	18134322	18148833	Fxa7Dg102086.1	PR5	PR5K_ARATH	Thaumatin
chr_7D	22149212	22150399	Fxa7Dg102828.1	PR5	THLP1_ARATH	TLP-PA
chr_2A	15192813	15193030	unannotated:chr_2A_15192813-15193030_6	PR5	PR5K_ARATH	GH64-TLP-SF
chr_2A	19619832	19620466	unannotated:chr_2A_19619832-19620466_6	PR5	CRJ35_CRYJA	TLP-PA
chr_1A	4406244	4408833	Fxa1Ag100794.1	PR7	SBT18_ARATH	Peptidases_S8_3
chr_1A	5085207	5089153	Fxa1Ag100889.1	PR7	SBTS_LOTJA	Peptidases_S8_3
chr_1A	8531565	8533847	Fxa1Ag101472.1	PR7	SBT19_ARATH	Peptidases_S8_3
chr_1A	9203448	9205733	Fxa1Ag101566.1	PR7	SBT17_ARATH	Peptidases_S8_3
chr_1A	15382273	15382950	Fxa1Ag102375.1	PR7	SBT17_ARATH	fn3_6
chr_1A	17757826	17767639	Fxa1Ag102648.1	PR7	KEA2_ARATH	PRK03562
chr_1B	3973159	3975749	Fxa1Bg200747.1	PR7	SBT18_ARATH	Peptidases_S8_3
chr_1B	4675585	4679511	Fxa1Bg200841.1	PR7	SBTS_LOTJA	Peptidases_S8_3
chr_1B	8670701	8672986	Fxa1Bg201443.1	PR7	SBT17_ARATH	Peptidases_S8_3
chr_1B	15683367	15686223	Fxa1Bg202251.1	PR7	SBT17_ARATH	Peptidases_S8_3
chr_1C	768544	769741	Fxa1Cg100130.1	PR7	SBT14_ARATH	PA_subtilisin_like
chr_1C	4228184	4230793	Fxa1Cg100758.1	PR7	SBT18_ARATH	Peptidases_S8_3
chr_1C	4766972	4770902	Fxa1Cg100846.1	PR7	SBTS_LOTJA	Peptidases_S8_3
chr_1C	7448655	7450474	Fxa1Cg101257.1	PR7	SBT22_ARATH	Peptidases_S8_S53
chr_1C	9411396	9413681	Fxa1Cg101523.1	PR7	SBT17_ARATH	Peptidases_S8_3
chr_1C	17151506	17153149	Fxa1Cg102394.1	PR7	SBT16_ARATH	Peptidases_S8_3
chr_1D	4064616	4067199	Fxa1Dg200690.1	PR7	SBT18_ARATH	Peptidases_S8_3
chr_1D	4583083	4586956	Fxa1Dg200765.1	PR7	SBTS_LOTJA	Peptidases_S8_3
chr_1D	9020490	9022775	Fxa1Dg201421.1	PR7	SBT17_ARATH	Peptidases_S8_3
chr_1D	14064314	14066522	Fxa1Dg201980.1	PR7	SBT16_ARATH	Peptidases_S8_3
chr_2A	1001260	1003569	Fxa2Ag100140.1	PR7	SBT16_ARATH	Peptidases_S8_3
chr_2A	7862670	7867668	Fxa2Ag101004.1	PR7	SBT36_ARATH	Peptidases_S8_3
chr_2A	16234562	16236874	Fxa2Ag102078.1	PR7	SBT12_ARATH	Peptidases_S8_3
chr_2A	23423419	23429380	Fxa2Ag103284.1	PR7	SBT17_ARATH	Peptidases_S8_3
chr_2A	23750919	23757067	Fxa2Ag103344.1	PR7	SBT17_ARATH	Peptidases_S8_3
chr_2A	23763476	23765650	Fxa2Ag103345.1	PR7	SBT3_SOLLC	Peptidases_S8_3
chr_2A	23789511	23789801	Fxa2Ag103348.1	PR7	SBT3_SOLLC	fn3_6
chr_2A	23789821	23793146	Fxa2Ag103349.1	PR7	SBT17_ARATH	Peptidases_S8_3
chr_2A	23794400	23796671	Fxa2Ag103350.1	PR7	SBT19_ARATH	Peptidases_S8_3
chr_2A	23799704	23801878	Fxa2Ag103351.1	PR7	SBT3_SOLLC	Peptidases_S8_3
chr_2A	25784710	25793238	Fxa2Ag103713.1	PR7	CRSP_ARATH	Peptidases_S8_3
chr_2B	858180	860489	Fxa2Bg200089.1	PR7	SBT16_ARATH	Peptidases_S8_3
chr_2B	3130377	3131811	Fxa2Bg200387.1	PR7	SBT43_ARATH	Peptidases_S8_S53
chr_2B	7892576	7898041	Fxa2Bg200892.1	PR7	SBT36_ARATH	Peptidases_S8_3
chr_2B	13385353	13387304	Fxa2Bg201478.1	PR7	SBT14_ARATH	Peptidases_S8_S53
chr_2B	16358154	16360466	Fxa2Bg201914.1	PR7	SBT12_ARATH	Peptidases_S8_3
chr_2B	23638684	23644986	Fxa2Bg203079.2	PR7	SBT17_ARATH	Peptidases_S8_3
chr_2B	23957644	23959920	Fxa2Bg203137.1	PR7	SBT17_ARATH	Peptidases_S8_3
chr_2B	23962810	23963229	Fxa2Bg203138.1	PR7	SBT16_ARATH	fn3_6
chr_2B	26125107	26132234	Fxa2Bg203510.1	PR7	CRSP_ARATH	Peptidases_S8_3
chr_2C	4165437	4167734	Fxa2Cg200722.1	PR7	SBT3_SOLLC	Peptidases_S8_3
chr_2C	4171217	4173857	Fxa2Cg200723.1	PR7	SBT3_SOLLC	Peptidases_S8_3
chr_2C	4186934	4187668	Fxa2Cg200724.1	PR7	SBT3_SOLLC	Peptidases_S8_S53
chr_2C	4187666	4191971	Fxa2Cg200725.1	PR7	protease	#N/A
chr_2C	4187684	4188538	Fxa2Cg200726.1	PR7	SBT17_ARATH	Peptidases_S8_S53
chr_2C	4191248	4193035	Fxa2Cg200727.1	PR7	SBT17_ARATH	Peptidases_S8_3
chr_2C	22242270	22244582	Fxa2Cg202843.1	PR7	SBT12_ARATH	Peptidases_S8_3
chr_2D	956329	958644	Fxa2Dg200100.1	PR7	SBT16_ARATH	Peptidases_S8_3
chr_2D	8278596	8282709	Fxa2Dg200874.1	PR7	SBT38_ARATH	Peptidases_S8_S53
chr_2D	16315238	16317550	Fxa2Dg201787.1	PR7	SBT12_ARATH	Peptidases_S8_3
chr_2D	16552054	16553149	Fxa2Dg201821.1	PR7	SBT14_ARATH	PA_subtilisin_like
chr_2D	23723542	23727604	Fxa2Dg202869.1	PR7	SBT17_ARATH	Peptidases_S8_3
chr_2D	23734241	23738208	Fxa2Dg202870.1	PR7	SBT17_ARATH	Peptidases_S8_3
chr_2D	24180104	24190388	Fxa2Dg202930.1	PR7	SBT17_ARATH	Peptidases_S8_3
chr_2D	24196737	24198119	Fxa2Dg202931.1	PR7	SBT3_SOLLC	Peptidases_S8_S53
chr_2D	26158854	26166145	Fxa2Dg203270.1	PR7	CRSP_ARATH	Peptidases_S8_3
chr_3A	92834	94924	Fxa3Ag100017.1	PR7	SBT54_ARATH	fn3_6
chr_3A	763191	773787	Fxa3Ag100129.1	PR7	SBT24_ARATH	Peptidases_S8_3
chr_3A	3797244	3803176	Fxa3Ag100614.1	PR7	SBT56_ARATH	Peptidases_S8_3
chr_3A	6632392	6638517	Fxa3Ag101074.1	PR7	SBT22_ARATH	Peptidases_S8_3
chr_3A	11526070	11527003	Fxa3Ag101814.1	PR7	SBT16_ARATH	Peptidases_S8_S53
chr_3A	15611239	15615391	Fxa3Ag102351.1	PR7	SBTS_LOTJA	fn3_6
chr_3A	15615697	15617253	Fxa3Ag102352.1	PR7	SBTS_LOTJA	Peptidases_S8_S53
chr_3A	23151080	23151671	Fxa3Ag103154.1	PR7	SBT56_ARATH	Peptidases_S8_S53
chr_3A	25728750	25743279	Fxa3Ag103474.1	PR7	SBT43_ARATH	Peptidases_S8_3
chr_3A	28574053	28581514	Fxa3Ag103935.1	PR7	SBT54_ARATH	Peptidases_S8_3
chr_3A	28869363	28874079	Fxa3Ag103977.1	PR7	AIR3_ARATH	Peptidases_S8_3
chr_3A	31001961	31005341	Fxa3Ag104321.1	PR7	SBT3I_ARATH	Peptidases_S8_3
chr_3B	88085	88836	Fxa3Bg200015.1	PR7	SBT54_ARATH	fn3_6
chr_3B	615956	622633	Fxa3Bg200132.1	PR7	SBT24_ARATH	Peptidases_S8_3
chr_3B	3188935	3194916	Fxa3Bg200566.1	PR7	SBT56_ARATH	Peptidases_S8_3
chr_3B	5769737	5775982	Fxa3Bg200963.1	PR7	SBT22_ARATH	Peptidases_S8_3
chr_3B	15682187	15685972	Fxa3Bg202148.1	PR7	SBTS_LOTJA	Peptidases_S8_3
chr_3B	25937226	25940651	Fxa3Bg203167.1	PR7	SBT43_ARATH	Peptidases_S8_3
chr_3B	27438389	27438703	Fxa3Bg203349.1	PR7	SBT14_ARATH	Peptidases_S8_S53
chr_3B	28982271	28989674	Fxa3Bg203591.1	PR7	SBT54_ARATH	Peptidases_S8_3
chr_3B	29184462	29187826	Fxa3Bg203618.1	PR7	AIR3_ARATH	Peptidases_S8_3
chr_3B	31009902	31013278	Fxa3Bg203877.1	PR7	SBT3I_ARATH	Peptidases_S8_3
chr_3C	704355	714576	Fxa3Cg100119.1	PR7	SBT24_ARATH	Peptidases_S8_3
chr_3C	3427839	3433817	Fxa3Cg100560.1	PR7	SBT56_ARATH	Peptidases_S8_3
chr_3C	5975564	5981658	Fxa3Cg100958.1	PR7	SBT22_ARATH	Peptidases_S8_3
chr_3C	14900274	14904106	Fxa3Cg102073.1	PR7	SBTS_LOTJA	Peptidases_S8_3
chr_3C	22604854	22618002	Fxa3Cg102770.1	PR7	SBT56_ARATH	Peptidases_S8_S53
chr_3C	25676216	25677530	Fxa3Cg103092.1	PR7	SBT43_ARATH	Peptidases_S8_S53
chr_3C	28745747	28753075	Fxa3Cg103519.1	PR7	SBT54_ARATH	Peptidases_S8_3
chr_3C	28996165	28999532	Fxa3Cg103550.1	PR7	AIR3_ARATH	Peptidases_S8_3
chr_3C	30889962	30898472	Fxa3Cg103814.1	PR7	SBT3I_ARATH	Peptidases_S8_S53
chr_3D	147571	151079	Fxa3Dg200015.1	PR7	SBT54_ARATH	Peptidases_S8_3
chr_3D	684975	688508	Fxa3Dg200116.1	PR7	SBT24_ARATH	Peptidases_S8_3
chr_3D	3202434	3208354	Fxa3Dg200536.1	PR7	SBT56_ARATH	Peptidases_S8_3
chr_3D	5608029	5614715	Fxa3Dg200885.1	PR7	SBT22_ARATH	Peptidases_S8_3
chr_3D	22489869	22495554	Fxa3Dg202763.1	PR7	SBT56_ARATH	Inhibitor_I9
chr_3D	24218107	24218659	Fxa3Dg202942.1	PR7	SBT16_ARATH	Peptidases_S8_S53
chr_3D	24915214	24922988	Fxa3Dg203009.1	PR7	SBT43_ARATH	Peptidases_S8_3
chr_3D	27815543	27822596	Fxa3Dg203381.1	PR7	SBT54_ARATH	Peptidases_S8_3
chr_3D	29849769	29853179	Fxa3Dg203686.1	PR7	SBT3I_ARATH	Peptidases_S8_3
chr_4A	5270854	5273819	Fxa4Ag100659.1	PR7	SBT26_ARATH	Peptidases_S8_S53
chr_4A	5290232	5292527	Fxa4Ag100661.1	PR7	SBT25_ARATH	Peptidases_S8_S53
chr_4B	7213850	7221324	Fxa4Bg100662.1	PR7	SBT26_ARATH	Peptidases_S8_3
chr_4C	9539207	9545615	Fxa4Cg200852.1	PR7	SBT26_ARATH	Peptidases_S8_3
chr_4D	5373371	5380804	Fxa4Dg100535.1	PR7	SBT26_ARATH	Peptidases_S8_3
chr_5A	737889	756210	Fxa5Ag200107.1	PR7	SBT4_LOTJA	Peptidases_S8_3
chr_5A	856852	858395	Fxa5Ag200122.1	PR7	SBT46_ARATH	Peptidases_S8_S53
chr_5A	5309631	5326883	Fxa5Ag200889.1	PR7	SBT38_ARATH	Peptidases_S8_3
chr_5B	757194	763154	Fxa5Bg100114.1	PR7	SBT4_LOTJA	Peptidases_S8_3
chr_5B	763155	763811	Fxa5Bg100115.1	PR7	SBT_MEDTR	fn3_6
chr_5B	764833	765594	Fxa5Bg100116.1	PR7	SBT_PETHY	Peptidases_S8_S53
chr_5B	765606	774519	Fxa5Bg100117.1	PR7	SBT4_LOTJA	Peptidases_S8_3
chr_5B	856983	860094	Fxa5Bg100132.1	PR7	CUCM1_CUCME	Peptidases_S8_3
chr_5B	5483436	5501552	Fxa5Bg100854.1	PR7	SBT38_ARATH	Peptidases_S8_3
chr_5B	16454410	16454754	Fxa5Bg102222.1	PR7	SBT14_ARATH	Peptidases_S8_S53
chr_5C	603543	605810	Fxa5Cg200095.1	PR7	SBT4_LOTJA	Peptidases_S8_3
chr_5C	706685	707040	Fxa5Cg200110.1	PR7	SBT17_ARATH	Peptidases_S8_S53
chr_5C	4980367	4991729	Fxa5Cg200773.1	PR7	SBT38_ARATH	Peptidases_S8_3
chr_5C	4997298	5005607	Fxa5Cg200776.1	PR7	SBT36_ARATH	Peptidases_S8_3
chr_5C	9979006	9979533	Fxa5Cg201505.1	PR7	protease	#N/A
chr_5D	652724	671573	Fxa5Dg200099.1	PR7	SBT4_LOTJA	Peptidases_S8_3
chr_5D	768075	771149	Fxa5Dg200117.1	PR7	CUCM1_CUCME	Peptidases_S8_3
chr_5D	5055600	5058742	Fxa5Dg200814.2	PR7	SBT36_ARATH	Peptidases_S8_3
chr_5D	5077752	5086032	Fxa5Dg200817.1	PR7	SBT33_ARATH	Peptidases_S8_3
chr_6A	562599	574250	Fxa6Ag100101.1	PR7	SBT3_SOLLC	Peptidases_S8_3
chr_6A	15334929	15338824	Fxa6Ag102335.1	PR7	MUC21_ARATH	Glyco_transf_61
chr_6A	23771731	23772877	Fxa6Ag103376.1	PR7	SBT14_ARATH	Peptidases_S8_S53
chr_6A	24234584	24236896	Fxa6Ag103445.1	PR7	SBT15_ARATH	Peptidases_S8_3
chr_6A	27192333	27197537	Fxa6Ag103878.1	PR7	AIR3_ARATH	Peptidases_S8_3
chr_6B	532655	534814	Fxa6Bg100093.1	PR7	SBT3_SOLLC	Peptidases_S8_3
chr_6B	536487	542597	Fxa6Bg100094.1	PR7	SBT3_SOLLC	Peptidases_S8_3
chr_6B	25697249	25698398	Fxa6Bg103104.1	PR7	SBT14_ARATH	Peptidases_S8_S53
chr_6B	26295796	26298135	Fxa6Bg103183.1	PR7	SBT15_ARATH	Peptidases_S8_3
chr_6B	28937267	28942517	Fxa6Bg103533.1	PR7	AIR3_ARATH	Peptidases_S8_3
chr_6C	24598521	24599670	Fxa6Cg103000.1	PR7	SBT14_ARATH	Peptidases_S8_S53
chr_6C	25038536	25040848	Fxa6Cg103065.1	PR7	SBT15_ARATH	Peptidases_S8_3
chr_6C	27836543	27841787	Fxa6Cg103438.1	PR7	AIR3_ARATH	Peptidases_S8_3
chr_6D	507443	509752	Fxa6Dg100086.1	PR7	SBT3_SOLLC	Peptidases_S8_3
chr_6D	511688	517592	Fxa6Dg100087.1	PR7	SBT3_SOLLC	Peptidases_S8_3
chr_6D	23326300	23329300	Fxa6Dg102912.1	PR7	SBT14_ARATH	Peptidases_S8_3
chr_6D	23872845	23875166	Fxa6Dg102977.1	PR7	SBT15_ARATH	Peptidases_S8_3
chr_6D	26584621	26589831	Fxa6Dg103343.1	PR7	AIR3_ARATH	Peptidases_S8_3
chr_7A	2558517	2566564	Fxa7Ag200320.1	PR7	SBT46_ARATH	Peptidases_S8_3
chr_7A	4132269	4137599	Fxa7Ag200484.1	PR7	CRSP_ARATH	Peptidases_S8_3
chr_7A	7488097	7490493	Fxa7Ag200897.1	PR7	SBT3_LOTJA	Peptidases_S8_3
chr_7A	7567211	7567620	Fxa7Ag200910.1	PR7	protease	#N/A
chr_7A	10633603	10646460	Fxa7Ag201316.1	PR7	SBT4E_ARATH	Peptidases_S8_3
chr_7A	14089348	14092505	Fxa7Ag201829.1	PR7	CUCM1_CUCME	Peptidases_S8_3
chr_7A	17013586	17017240	Fxa7Ag202341.1	PR7	SBT46_ARATH	Peptidases_S8_3
chr_7A	19543151	19551104	Fxa7Ag202800.1	PR7	SBT13_ARATH	PLN03210
chr_7B	993723	995918	Fxa7Bg200101.1	PR7	SBT3_SOLLC	Peptidases_S8_3
chr_7B	3196532	3198739	Fxa7Bg200318.1	PR7	SBT46_ARATH	Peptidases_S8_3
chr_7B	3202658	3206069	Fxa7Bg200320.1	PR7	SBT46_ARATH	Peptidases_S8_3
chr_7B	5309670	5314958	Fxa7Bg200529.1	PR7	CRSP_ARATH	Peptidases_S8_3
chr_7B	8376745	8379587	Fxa7Bg200912.1	PR7	SBT3_LOTJA	Peptidases_S8_3
chr_7B	12009214	12017570	Fxa7Bg201339.1	PR7	SBT4E_ARATH	Peptidases_S8_3
chr_7B	18071517	18072855	Fxa7Bg202250.1	PR7	SBT43_ARATH	Peptidases_S8_S53
chr_7B	20591016	20593346	Fxa7Bg202671.1	PR7	SBT13_ARATH	Peptidases_S8_3
chr_7B	20782681	20785589	Fxa7Bg202688.1	PR7	#N/A	P4Hc
chr_7C	7728879	7730073	Fxa7Cg100799.1	PR7	SBT11_ARATH	Peptidases_S8_S53
chr_7C	11580644	11589028	Fxa7Cg101221.1	PR7	SBT4E_ARATH	Peptidases_S8_3
chr_7C	17982012	17982536	Fxa7Cg102185.1	PR7	SBT46_ARATH	fn3_6
chr_7C	20519608	20527530	Fxa7Cg102638.1	PR7	SBT13_ARATH	PLN03210
chr_7C	20675551	20678305	Fxa7Cg102657.1	PR7	#N/A	P4Hc
chr_7D	2960107	2967003	Fxa7Dg100249.1	PR7	SBT44_ARATH	Peptidases_S8_3
chr_7D	2967030	2968558	Fxa7Dg100250.1	PR7	SBT43_ARATH	Peptidases_S8_3
chr_7D	5144435	5150048	Fxa7Dg100414.1	PR7	CRSP_ARATH	Peptidases_S8_S53
chr_7D	11651231	11659550	Fxa7Dg101138.1	PR7	SBT4E_ARATH	Peptidases_S8_3
chr_7D	15045410	15048767	Fxa7Dg101597.1	PR7	CUCM1_CUCME	Peptidases_S8_3
chr_7D	17902419	17908109	Fxa7Dg102051.1	PR7	SBT46_ARATH	Peptidases_S8_3
chr_7D	20080708	20088515	Fxa7Dg102449.1	PR7	SBT13_ARATH	PLN03210
chr_7D	20221457	20224207	Fxa7Dg102466.1	PR7	#N/A	P4Hc
chr_1A	8534956	8535319	Fxa1Ag101473.1	PR6	ICID_SOLTU	potato_inhibit
chr_4A	1726858	1728408	Fxa4Ag100208.1	PR6	BGIA_MOMCH	potato_inhibit
chr_4A	1749376	1752169	Fxa4Ag100209.1	PR6	ITH5_CUCMA	potato_inhibit
chr_4B	2138218	2140577	Fxa4Bg100203.1	PR6	BGIA_MOMCH	potato_inhibit
chr_4B	2148295	2148985	Fxa4Bg100204.1	PR6	BGIA_MOMCH	potato_inhibit
chr_4B	2161725	2163875	Fxa4Bg100206.1	PR6	ITH5_CUCMA	potato_inhibit
chr_4C	1820141	1825975	Fxa4Cg200178.1	PR6	BGIA_MOMCH	potato_inhibit
chr_4C	1870096	1870462	Fxa4Cg200182.1	PR6	ITH5_CUCMA	potato_inhibit
chr_4A	1746167	1746354	unannotated:chr_4A_1746167-1746354_3	PR6	BGIA_MOMCH	potato_inhibit
chr_4A	1786884	1787074	unannotated:chr_4A_1786884-1787074_3	PR6	BGIA_MOMCH	potato_inhibit
chr_4B	2163685	2163872	unannotated:chr_4B_2163685-2163872_3	PR6	ITH5_CUCMA	potato_inhibit
chr_4C	1825779	1825972	unannotated:chr_4C_1825779-1825972_3	PR6	BGIA_MOMCH	potato_inhibit
chr_4C	1828173	1828369	unannotated:chr_4C_1828173-1828369_3	PR6	ITH5_CUCMA	potato_inhibit
chr_4C	1831102	1831298	unannotated:chr_4C_1831102-1831298_3	PR6	ITH5_CUCMA	potato_inhibit
chr_4C	1837524	1837708	unannotated:chr_4C_1837524-1837708_3	PR6	BGIA_MOMCH	potato_inhibit
chr_4C	1840006	1840193	unannotated:chr_4C_1840006-1840193_3	PR6	ITH5_CUCMA	potato_inhibit
chr_4C	1842957	1843153	unannotated:chr_4C_1842957-1843153_3	PR6	ITH5_CUCMA	potato_inhibit
chr_1A	4763176	4763408	unannotated:chr_1A_4763176-4763408_6	PR7	SBT3_SOLLC	Peptidases_S8_S53
chr_1A	4763411	4763532	unannotated:chr_1A_4763411-4763532_6	PR7	SBT3_SOLLC	Inhibitor_I9
chr_6A	27499230	27500117	Fxa6Ag103931.1	PR8	CHLY_HEVBR	GH18_hevamine_XipI_class_III
chr_7A	12434534	12439561	Fxa7Ag201591.1	PR8	CHIB_TOBAC	GH18_hevamine_XipI_class_III
chr_7A	20397563	20398462	Fxa7Ag202965.1	PR8	CHIA_ARATH	GH18_hevamine_XipI_class_III
chr_7A	20681619	20682398	Fxa7Ag203011.1	PR8	CHIA_ARATH	GH18_hevamine_XipI_class_III
chr_7A	20732701	20733618	Fxa7Ag203023.1	PR8	CHIT3_VITVI	GH18_hevamine_XipI_class_III
chr_7B	21513375	21514274	Fxa7Bg202832.1	PR8	CHIA_ARATH	GH18_hevamine_XipI_class_III
chr_7B	21747450	21748367	Fxa7Bg202885.1	PR8	CHIT3_VITVI	GH18_hevamine_XipI_class_III
chr_7C	13446303	13446989	Fxa7Cg101478.1	PR8	CHIA_TOBAC	GH18_chitinase-like
chr_7C	13538503	13540424	Fxa7Cg101491.1	PR8	CHIB_TOBAC	GH18_hevamine_XipI_class_III
chr_7C	21492928	21493827	Fxa7Cg102812.1	PR8	CHLY_HEVBR	GH18_hevamine_XipI_class_III
chr_7C	21514195	21515133	Fxa7Cg102817.1	PR8	CHIT3_VITVI	GH18_hevamine_XipI_class_III
chr_7D	13352043	13352692	Fxa7Dg101358.1	PR8	hevamine-A	#N/A
chr_7D	13411612	13412376	Fxa7Dg101366.1	PR8	CHIB_TOBAC	GH18_chitinase-like
chr_7D	20871267	20872166	Fxa7Dg102591.1	PR8	CHIA_ARATH	GH18_hevamine_XipI_class_III
chr_7D	21125874	21126653	Fxa7Dg102629.1	PR8	CHIA_ARATH	GH18_hevamine_XipI_class_III
chr_7D	21170479	21171396	Fxa7Dg102638.1	PR8	CHIT3_VITVI	GH18_hevamine_XipI_class_III
chr_1C	4539446	4539858	unannotated:chr_1C_4539446-4539858_6	PR7	SBT3_SOLLC	Peptidases_S8_S53
chr_1D	4352873	4353111	unannotated:chr_1D_4352873-4353111_6	PR7	SBT3_SOLLC	Peptidases_S8_S53
chr_1A	1711566	1712910	Fxa1Ag100297.1	PR9	PER25_ARATH	secretory_peroxidase
chr_1A	5857212	5858507	Fxa1Ag101028.1	PR9	PER64_ARATH	secretory_peroxidase
chr_1A	6568876	6570516	Fxa1Ag101154.1	PR9	PER72_ARATH	secretory_peroxidase
chr_1A	8127896	8132440	Fxa1Ag101408.1	PR9	PER10_ARATH	secretory_peroxidase
chr_1A	9281029	9282870	Fxa1Ag101579.1	PR9	PER73_ARATH	secretory_peroxidase
chr_1A	11475529	11482027	Fxa1Ag101870.1	PR9	PER17_ARATH	secretory_peroxidase
chr_1B	1533913	1535344	Fxa1Bg200288.1	PR9	PER25_ARATH	secretory_peroxidase
chr_1B	5328956	5330219	Fxa1Bg200961.1	PR9	PER64_ARATH	secretory_peroxidase
chr_1B	6140770	6142420	Fxa1Bg201083.1	PR9	PER72_ARATH	secretory_peroxidase
chr_1B	7628250	7632776	Fxa1Bg201301.1	PR9	PER10_ARATH	secretory_peroxidase
chr_1B	8759670	8761447	Fxa1Bg201460.1	PR9	PER73_ARATH	secretory_peroxidase
chr_1B	11044104	11049750	Fxa1Bg201756.1	PR9	PER17_ARATH	secretory_peroxidase
chr_1C	1532192	1533621	Fxa1Cg100260.1	PR9	PER25_ARATH	secretory_peroxidase
chr_1C	5563278	5564548	Fxa1Cg100977.1	PR9	PER64_ARATH	secretory_peroxidase
chr_1C	6449068	6450666	Fxa1Cg101107.1	PR9	PER72_ARATH	secretory_peroxidase
chr_1C	8246294	8247973	Fxa1Cg101375.1	PR9	PER10_ARATH	secretory_peroxidase
chr_1C	8261754	8263231	Fxa1Cg101377.1	PR9	PER10_ARATH	secretory_peroxidase
chr_1C	9520726	9522582	Fxa1Cg101538.1	PR9	PER73_ARATH	secretory_peroxidase
chr_1C	12197204	12202843	Fxa1Cg101844.1	PR9	PER17_ARATH	secretory_peroxidase
chr_1D	1685333	1686666	Fxa1Dg200270.1	PR9	PER25_ARATH	secretory_peroxidase
chr_1D	5398097	5399360	Fxa1Dg200906.1	PR9	PER64_ARATH	secretory_peroxidase
chr_1D	6313724	6315325	Fxa1Dg201043.1	PR9	PER72_ARATH	secretory_peroxidase
chr_1D	7856355	7861839	Fxa1Dg201265.1	PR9	PER10_ARATH	secretory_peroxidase
chr_1D	9141214	9143412	Fxa1Dg201437.1	PR9	PER73_ARATH	secretory_peroxidase
chr_1D	11748956	11754611	Fxa1Dg201735.1	PR9	PER17_ARATH	secretory_peroxidase
chr_2A	3432343	3433416	Fxa2Ag100504.1	PR9	PER44_ARATH	secretory_peroxidase
chr_2A	4656333	4658413	Fxa2Ag100657.1	PR9	PER10_ARATH	secretory_peroxidase
chr_2A	8157145	8158763	Fxa2Ag101032.1	PR9	PER19_ARATH	secretory_peroxidase
chr_2A	10709940	10712476	Fxa2Ag101319.1	PR9	PER12_ARATH	secretory_peroxidase
chr_2A	12691490	12692030	Fxa2Ag101540.1	PR9	peroxidase	#N/A
chr_2A	19772298	19773777	Fxa2Ag102675.1	PR9	PER3_ARATH	secretory_peroxidase
chr_2A	21605866	21606663	Fxa2Ag102971.1	PR9	PERX_NICSY	plant_peroxidase_like
chr_2A	21902596	21903854	Fxa2Ag103017.1	PR9	PERX_NICSY	secretory_peroxidase
chr_2A	21913724	21915022	Fxa2Ag103020.1	PR9	PERX_NICSY	secretory_peroxidase
chr_2A	25101884	25103820	Fxa2Ag103585.1	PR9	PER16_ARATH	secretory_peroxidase
chr_2A	26468077	26469487	Fxa2Ag103827.1	PR9	PER9_ARATH	secretory_peroxidase
chr_2A	27445657	27447152	Fxa2Ag104019.1	PR9	PER46_ARATH	secretory_peroxidase
chr_2B	3361333	3362402	Fxa2Bg200415.1	PR9	PER44_ARATH	secretory_peroxidase
chr_2B	8051536	8053083	Fxa2Bg200912.1	PR9	PER19_ARATH	secretory_peroxidase
chr_2B	10451928	10454399	Fxa2Bg201155.1	PR9	PER12_ARATH	secretory_peroxidase
chr_2B	20356917	20358393	Fxa2Bg202520.1	PR9	PER3_ARATH	secretory_peroxidase
chr_2B	22296670	22297915	Fxa2Bg202845.1	PR9	PERX_NICSY	secretory_peroxidase
chr_2B	25216381	25223343	Fxa2Bg203361.1	PR9	PER16_ARATH	secretory_peroxidase
chr_2B	25497478	25498874	Fxa2Bg203395.1	PR9	PER9_ARATH	secretory_peroxidase
chr_2B	27348498	27349995	Fxa2Bg203778.1	PR9	PER46_ARATH	secretory_peroxidase
chr_2C	168719	170215	Fxa2Cg200016.1	PR9	PER46_ARATH	secretory_peroxidase
chr_2C	1190675	1192061	Fxa2Cg200222.1	PR9	PER9_ARATH	secretory_peroxidase
chr_2C	2623543	2625475	Fxa2Cg200470.1	PR9	PER16_ARATH	secretory_peroxidase
chr_2C	4829429	4829972	Fxa2Cg200799.1	PR9	peroxidase	#N/A
chr_2C	6819920	6821182	Fxa2Cg201053.1	PR9	PERX_NICSY	secretory_peroxidase
chr_2C	12053593	12055580	Fxa2Cg201719.1	PR9	PER10_ARATH	secretory_peroxidase
chr_2C	14543388	14545817	Fxa2Cg201943.1	PR9	PER19_ARATH	secretory_peroxidase
chr_2C	26455740	26457185	Fxa2Cg203427.1	PR9	PER3_ARATH	secretory_peroxidase
chr_2D	8446528	8448148	Fxa2Dg200895.1	PR9	PER19_ARATH	secretory_peroxidase
chr_2D	10783821	10786328	Fxa2Dg201139.1	PR9	PER12_ARATH	secretory_peroxidase
chr_2D	20982686	20984162	Fxa2Dg202454.1	PR9	PER3_ARATH	secretory_peroxidase
chr_2D	22131838	22133083	Fxa2Dg202622.1	PR9	PERX_NICSY	secretory_peroxidase
chr_2D	25528116	25530047	Fxa2Dg203156.1	PR9	PER16_ARATH	secretory_peroxidase
chr_2D	26824617	26826014	Fxa2Dg203395.1	PR9	PER9_ARATH	secretory_peroxidase
chr_2D	28072788	28074278	Fxa2Dg203612.1	PR9	PER46_ARATH	plant_peroxidase_like
chr_3A	1101210	1102577	Fxa3Ag100186.1	PR9	PER42_ARATH	secretory_peroxidase
chr_3A	1450796	1452649	Fxa3Ag100239.1	PR9	PER27_ARATH	secretory_peroxidase
chr_3A	7661347	7662832	Fxa3Ag101223.1	PR9	PER7_ARATH	secretory_peroxidase
chr_3A	8095998	8097218	Fxa3Ag101284.1	PR9	PER7_ARATH	secretory_peroxidase
chr_3A	8798491	8801211	Fxa3Ag101392.1	PR9	PER48_ARATH	secretory_peroxidase
chr_3A	8805208	8810411	Fxa3Ag101394.1	PR9	PER48_ARATH	secretory_peroxidase
chr_3A	8827478	8829347	Fxa3Ag101396.1	PR9	PER48_ARATH	peroxidase
chr_3A	12585742	12588076	Fxa3Ag101948.1	PR9	PER47_ARATH	secretory_peroxidase
chr_3A	16253445	16255116	Fxa3Ag102423.1	PR9	PER60_ARATH	secretory_peroxidase
chr_3A	17534337	17535987	Fxa3Ag102584.1	PR9	PER26_ARATH	secretory_peroxidase
chr_3A	27109616	27110298	Fxa3Ag103677.1	PR9	peroxidase	#N/A
chr_3A	27480345	27488454	Fxa3Ag103743.1	PR9	TI110_ARATH	Tic110
chr_3A	27510582	27518310	Fxa3Ag103748.1	PR9	PP247_ARATH	plant_peroxidase_like
chr_3A	27518367	27521554	Fxa3Ag103749.1	PR9	RIP1_MEDTR	secretory_peroxidase
chr_3A	27534677	27535992	Fxa3Ag103751.1	PR9	RIP1_MEDTR	secretory_peroxidase
chr_3A	27539236	27549584	Fxa3Ag103752.1	PR9	PER4_VITVI	secretory_peroxidase
chr_3A	30190576	30195953	Fxa3Ag104186.1	PR9	PER15_IPOBA	secretory_peroxidase
chr_3B	870931	872299	Fxa3Bg200185.1	PR9	PER42_ARATH	secretory_peroxidase
chr_3B	1148074	1150115	Fxa3Bg200246.1	PR9	PER27_ARATH	secretory_peroxidase
chr_3B	6818095	6819542	Fxa3Bg201118.1	PR9	PER7_ARATH	secretory_peroxidase
chr_3B	7201347	7202563	Fxa3Bg201166.1	PR9	PER7_ARATH	secretory_peroxidase
chr_3B	7908297	7911084	Fxa3Bg201262.1	PR9	PER48_ARATH	secretory_peroxidase
chr_3B	7914109	7916341	Fxa3Bg201264.1	PR9	PER48_ARATH	secretory_peroxidase
chr_3B	11569235	11570006	Fxa3Bg201711.1	PR9	PER47_ARATH	plant_peroxidase_like
chr_3B	17339989	17341631	Fxa3Bg202311.1	PR9	PER26_ARATH	secretory_peroxidase
chr_3B	27943579	27952165	Fxa3Bg203426.1	PR9	TI110_ARATH	Tic110
chr_3B	27967347	27968663	Fxa3Bg203429.1	PR9	RIP1_MEDTR	secretory_peroxidase
chr_3B	27970936	27972106	Fxa3Bg203430.1	PR9	RIP1_MEDTR	secretory_peroxidase
chr_3B	27986314	27988692	Fxa3Bg203432.1	PR9	PER4_VITVI	secretory_peroxidase
chr_3B	30414403	30415907	Fxa3Bg203775.1	PR9	PERN_ARMRU	secretory_peroxidase
chr_3C	1052488	1053859	Fxa3Cg100175.1	PR9	PER42_ARATH	secretory_peroxidase
chr_3C	1382969	1384273	Fxa3Cg100241.1	PR9	PER56_ARATH	plant_peroxidase_like
chr_3C	7161042	7162470	Fxa3Cg101092.1	PR9	PER7_ARATH	secretory_peroxidase
chr_3C	7614724	7615928	Fxa3Cg101146.1	PR9	PER7_ARATH	secretory_peroxidase
chr_3C	8298027	8300750	Fxa3Cg101246.1	PR9	PER48_ARATH	secretory_peroxidase
chr_3C	8306150	8308289	Fxa3Cg101248.1	PR9	PER48_ARATH	secretory_peroxidase
chr_3C	11819530	11821045	Fxa3Cg101720.1	PR9	PER47_ARATH	secretory_peroxidase
chr_3C	15468066	15469163	Fxa3Cg102122.1	PR9	PER60_ARATH	secretory_peroxidase
chr_3C	16211737	16213817	Fxa3Cg102206.1	PR9	PER26_ARATH	secretory_peroxidase
chr_3C	27592152	27600190	Fxa3Cg103354.1	PR9	TI110_ARATH	Tic110
chr_3C	27615345	27616886	Fxa3Cg103357.1	PR9	RIP1_MEDTR	secretory_peroxidase
chr_3C	27631231	27632546	Fxa3Cg103359.1	PR9	RIP1_MEDTR	secretory_peroxidase
chr_3C	27635784	27636977	Fxa3Cg103360.1	PR9	RIP1_MEDTR	secretory_peroxidase
chr_3C	27649222	27654426	Fxa3Cg103362.1	PR9	PER4_VITVI	secretory_peroxidase
chr_3C	30181048	30182573	Fxa3Cg103704.1	PR9	PERN_ARMRU	secretory_peroxidase
chr_3D	924059	925427	Fxa3Dg200161.1	PR9	PER42_ARATH	secretory_peroxidase
chr_3D	1175223	1177326	Fxa3Dg200213.1	PR9	PER27_ARATH	secretory_peroxidase
chr_3D	6815060	6816551	Fxa3Dg201053.1	PR9	PER7_ARATH	secretory_peroxidase
chr_3D	7274999	7276221	Fxa3Dg201106.1	PR9	PER7_ARATH	secretory_peroxidase
chr_3D	7948959	7951000	Fxa3Dg201198.1	PR9	PER48_ARATH	secretory_peroxidase
chr_3D	7962364	7965150	Fxa3Dg201200.1	PR9	PER48_ARATH	secretory_peroxidase
chr_3D	11606541	11608035	Fxa3Dg201659.1	PR9	PER47_ARATH	secretory_peroxidase
chr_3D	26689908	26691580	Fxa3Dg203217.1	PR9	PER1_ARAHY	plant_peroxidase_like
chr_3D	26696714	26698256	Fxa3Dg203219.1	PR9	RIP1_MEDTR	secretory_peroxidase
chr_3D	29040269	29045720	Fxa3Dg203567.1	PR9	PER15_IPOBA	secretory_peroxidase
chr_4A	5492042	5493273	Fxa4Ag100681.1	PR9	PER43_ARATH	secretory_peroxidase
chr_4A	5652038	5653610	Fxa4Ag100700.1	PR9	PER45_ARATH	secretory_peroxidase
chr_4A	14069243	14069786	Fxa4Ag101599.1	PR9	peroxidase	#N/A
chr_4A	14768513	14774450	Fxa4Ag101692.1	PR9	PER24_ARATH	secretory_peroxidase
chr_4A	15651114	15658837	Fxa4Ag101794.1	PR9	PER5_VITVI	secretory_peroxidase
chr_4A	17020420	17021638	Fxa4Ag101985.1	PR9	PER29_ARATH	plant_peroxidase_like
chr_4A	17134356	17135958	Fxa4Ag102006.1	PR9	PER40_ARATH	secretory_peroxidase
chr_4A	19932723	19936313	Fxa4Ag102435.1	PR9	PER72_ARATH	secretory_peroxidase
chr_4A	20411280	20412830	Fxa4Ag102502.1	PR9	PER57_ARATH	secretory_peroxidase
chr_4A	22056872	22069993	Fxa4Ag102764.1	PR9	TTM2_ARATH	PLN02318
chr_4A	25924820	25926109	Fxa4Ag103448.1	PR9	PERX_NICSY	secretory_peroxidase
chr_4B	7740616	7742149	Fxa4Bg100695.1	PR9	PER45_ARATH	secretory_peroxidase
chr_4B	19211385	19214900	Fxa4Bg101640.1	PR9	PER24_ARATH	secretory_peroxidase
chr_4B	19993759	19997842	Fxa4Bg101728.1	PR9	PER5_VITVI	secretory_peroxidase
chr_4B	21264773	21265986	Fxa4Bg101912.1	PR9	PER29_ARATH	secretory_peroxidase
chr_4B	21438644	21440064	Fxa4Bg101930.1	PR9	PER40_ARATH	secretory_peroxidase
chr_4B	24474415	24475591	Fxa4Bg102387.1	PR9	PER5_VITVI	secretory_peroxidase
chr_4B	25006838	25008349	Fxa4Bg102457.1	PR9	PER45_ARATH	plant_peroxidase_like
chr_4B	26484845	26497868	Fxa4Bg102680.1	PR9	TTM2_ARATH	PLN02318
chr_4B	29299393	29300411	Fxa4Bg103167.1	PR9	PER41_ARATH	plant_peroxidase_like
chr_4B	29794974	29796258	Fxa4Bg103247.2	PR9	PERX_NICSY	secretory_peroxidase
chr_4C	9064061	9065636	Fxa4Cg200809.1	PR9	PER45_ARATH	secretory_peroxidase
chr_4C	14961683	14965191	Fxa4Cg201411.1	PR9	PER24_ARATH	secretory_peroxidase
chr_4C	15827258	15827848	Fxa4Cg201514.1	PR9	PER5_VITVI	plant_peroxidase_like
chr_4C	17185607	17187014	Fxa4Cg201690.1	PR9	PER40_ARATH	secretory_peroxidase
chr_4C	19927840	19929017	Fxa4Cg202083.1	PR9	PER5_VITVI	secretory_peroxidase
chr_4C	19941588	19942777	Fxa4Cg202084.1	PR9	PER58_ARATH	plant_peroxidase_like
chr_4C	20498569	20500332	Fxa4Cg202165.1	PR9	PER45_ARATH	plant_peroxidase_like
chr_4C	22410955	22426241	Fxa4Cg202435.1	PR9	TTM2_ARATH	PLN02318
chr_4C	26213111	26214395	Fxa4Cg203042.2	PR9	PERX_NICSY	secretory_peroxidase
chr_4D	13575587	13579191	Fxa4Dg101306.1	PR9	PER24_ARATH	secretory_peroxidase
chr_4D	14204079	14208177	Fxa4Dg101386.1	PR9	PER5_VITVI	secretory_peroxidase
chr_4D	15322837	15324049	Fxa4Dg101525.1	PR9	PER29_ARATH	secretory_peroxidase
chr_4D	15493044	15494464	Fxa4Dg101544.1	PR9	PER40_ARATH	secretory_peroxidase
chr_4D	18179652	18188639	Fxa4Dg101927.1	PR9	PER5_VITVI	secretory_peroxidase
chr_4D	18189919	18190632	Fxa4Dg101928.1	PR9	PER45_ARATH	plant_peroxidase_like
chr_4D	20351608	20363025	Fxa4Dg102218.1	PR9	TTM2_ARATH	PLN02318
chr_4D	23716360	23717391	Fxa4Dg102747.1	PR9	PER41_ARATH	plant_peroxidase_like
chr_4D	24242492	24243777	Fxa4Dg102826.1	PR9	PERX_NICSY	secretory_peroxidase
chr_5A	8489553	8492784	Fxa5Ag201441.1	PR9	PER41_ARATH	secretory_peroxidase
chr_5A	11373883	11374448	Fxa5Ag201870.1	PR9	peroxidase	#N/A
chr_5A	11670455	11678750	Fxa5Ag201908.1	PR9	PER20_ARATH	serpinP_plants
chr_5A	13802463	13803701	Fxa5Ag202169.1	PR9	PERN1_TOBAC	PLN03030
chr_5A	19723002	19724564	Fxa5Ag202903.1	PR9	PER43_ARATH	secretory_peroxidase
chr_5B	8932114	8935701	Fxa5Bg101386.1	PR9	PER41_ARATH	secretory_peroxidase
chr_5B	12654695	12656184	Fxa5Bg101859.1	PR9	PER20_ARATH	secretory_peroxidase
chr_5B	13044577	13045829	Fxa5Bg101906.1	PR9	PERN1_TOBAC	PLN03030
chr_5B	13068812	13070061	Fxa5Bg101907.1	PR9	PERN1_TOBAC	PLN03030
chr_5B	15338075	15339280	Fxa5Bg102128.1	PR9	PERN1_TOBAC	PLN03030
chr_5C	8522105	8525310	Fxa5Cg201295.1	PR9	PER41_ARATH	secretory_peroxidase
chr_5C	11942544	11953628	Fxa5Cg201740.1	PR9	PER20_ARATH	plant_peroxidase_like
chr_5C	14459842	14461153	Fxa5Cg202002.1	PR9	PER2_ARAHY	PLN03030
chr_5D	8730438	8736216	Fxa5Dg201333.1	PR9	PER41_ARATH	secretory_peroxidase
chr_5D	12503501	12504750	Fxa5Dg201823.1	PR9	PERN1_TOBAC	PLN03030
chr_5D	14387791	14389032	Fxa5Dg202038.1	PR9	PERN1_TOBAC	PLN03030
chr_5D	19482384	19483856	Fxa5Dg202646.1	PR9	PER43_ARATH	secretory_peroxidase
chr_6A	4084361	4085441	Fxa6Ag100713.1	PR9	PER5_VITVI	secretory_peroxidase
chr_6A	5267264	5269005	Fxa6Ag100913.1	PR9	PER1_ARAHY	secretory_peroxidase
chr_6A	8895314	8898631	Fxa6Ag101490.1	PR9	PER21_ARATH	secretory_peroxidase
chr_6A	18292433	18293843	Fxa6Ag102659.1	PR9	PER52_ARATH	secretory_peroxidase
chr_6A	21405049	21406472	Fxa6Ag103059.1	PR9	PER29_ARATH	plant_peroxidase_like
chr_6A	28763495	28764863	Fxa6Ag104140.1	PR9	PER27_ARATH	secretory_peroxidase
chr_6A	28767718	28775710	Fxa6Ag104141.1	PR9	PER3_ARATH	secretory_peroxidase
chr_6A	32152557	32154474	Fxa6Ag104769.1	PR9	PER63_ARATH	secretory_peroxidase
chr_6A	32154198	32154699	Fxa6Ag104770.1	PR9	peroxidase	#N/A
chr_6A	33948062	33952020	Fxa6Ag105088.1	PR9	PER55_ARATH	secretory_peroxidase
chr_6B	3877548	3878628	Fxa6Bg100661.1	PR9	PER5_VITVI	secretory_peroxidase
chr_6B	5046155	5047891	Fxa6Bg100835.1	PR9	PER1_ARAHY	secretory_peroxidase
chr_6B	8623241	8624845	Fxa6Bg101324.1	PR9	PER21_ARATH	secretory_peroxidase
chr_6B	15886116	15887469	Fxa6Bg102113.1	PR9	PER4_VITVI	secretory_peroxidase
chr_6B	19885527	19887904	Fxa6Bg102428.1	PR9	PER52_ARATH	secretory_peroxidase
chr_6B	23259633	23261069	Fxa6Bg102824.1	PR9	PER29_ARATH	secretory_peroxidase
chr_6B	33943482	33944453	Fxa6Bg104329.1	PR9	PER63_ARATH	secretory_peroxidase
chr_6B	33943647	33944396	Fxa6Bg104330.1	PR9	peroxidase	#N/A
chr_6B	35418659	35422609	Fxa6Bg104583.1	PR9	PER55_ARATH	secretory_peroxidase
chr_6C	3972256	3973327	Fxa6Cg100640.1	PR9	PER5_VITVI	secretory_peroxidase
chr_6C	5168621	5170361	Fxa6Cg100792.1	PR9	PER1_ARAHY	secretory_peroxidase
chr_6C	8750920	8757995	Fxa6Cg101289.1	PR9	PER21_ARATH	secretory_peroxidase
chr_6C	15451198	15452460	Fxa6Cg102029.1	PR9	PER52_ARATH	plant_peroxidase_like
chr_6C	22135269	22136713	Fxa6Cg102715.1	PR9	PER29_ARATH	secretory_peroxidase
chr_6C	23664867	23665349	Fxa6Cg102886.1	PR9	PER63_ARATH	plant_peroxidase_like
chr_6C	23665537	23666023	Fxa6Cg102887.1	PR9	peroxidase	#N/A
chr_6C	26110373	26110930	Fxa6Cg103195.1	PR9	peroxidase	#N/A
chr_6C	29608778	29616981	Fxa6Cg103689.1	PR9	PER3_ARATH	secretory_peroxidase
chr_6C	32875347	32875833	Fxa6Cg104237.1	PR9	peroxidase	#N/A
chr_6C	34697246	34701187	Fxa6Cg104529.1	PR9	PER55_ARATH	secretory_peroxidase
chr_6D	4636998	4638741	Fxa6Dg100739.1	PR9	PER1_ARAHY	secretory_peroxidase
chr_6D	8253952	8255552	Fxa6Dg101242.1	PR9	PER21_ARATH	secretory_peroxidase
chr_6D	18042761	18044058	Fxa6Dg102289.1	PR9	PER52_ARATH	secretory_peroxidase
chr_6D	21107372	21108735	Fxa6Dg102668.1	PR9	PER29_ARATH	plant_peroxidase_like
chr_6D	28110372	28117000	Fxa6Dg103588.1	PR9	PER3_ARATH	secretory_peroxidase
chr_6D	31344906	31345399	Fxa6Dg104145.1	PR9	peroxidase	#N/A
chr_6D	32708546	32709718	Fxa6Dg104405.1	PR9	PER55_ARATH	secretory_peroxidase
chr_7A	17838629	17839821	Fxa7Ag202492.1	PR9	PER4_VITVI	secretory_peroxidase
chr_7A	17872677	17877924	Fxa7Ag202494.1	PR9	PER4_VITVI	secretory_peroxidase
chr_7A	19693643	19694843	Fxa7Ag202821.1	PR9	PER66_ARATH	secretory_peroxidase
chr_7A	21857492	21859219	Fxa7Ag203228.1	PR9	NACA2_ARATH	NAC_NACA
chr_7A	21859064	21860346	Fxa7Ag203229.1	PR9	PER5_VITVI	secretory_peroxidase
chr_7B	9060265	9060823	Fxa7Bg200977.1	PR9	peroxidase	#N/A
chr_7B	19118499	19119688	Fxa7Bg202398.1	PR9	PER1_ARAHY	plant_peroxidase_like
chr_7B	19134868	19136250	Fxa7Bg202402.1	PR9	PER4_VITVI	secretory_peroxidase
chr_7B	19137015	19142475	Fxa7Bg202403.1	PR9	PER52_ARATH	secretory_peroxidase
chr_7B	20786337	20787533	Fxa7Bg202689.1	PR9	PER66_ARATH	secretory_peroxidase
chr_7C	18808503	18809696	Fxa7Cg102323.1	PR9	PER4_VITVI	secretory_peroxidase
chr_7C	18844364	18849891	Fxa7Cg102327.1	PR9	PERP7_BRARR	secretory_peroxidase
chr_7C	20036771	20038768	Fxa7Cg102546.1	PR9	PER10_ARATH	secretory_peroxidase
chr_7C	22304482	22305764	Fxa7Cg102970.1	PR9	PER5_VITVI	secretory_peroxidase
chr_7D	16374272	16374812	Fxa7Dg101792.1	PR9	peroxidase	#N/A
chr_7D	18765265	18766479	Fxa7Dg102201.1	PR9	PER4_VITVI	secretory_peroxidase
chr_7D	18783897	18785628	Fxa7Dg102204.1	PR9	PER4_VITVI	secretory_peroxidase
chr_7D	18786202	18787671	Fxa7Dg102205.1	PR9	PER4_VITVI	secretory_peroxidase
chr_7D	20224850	20226041	Fxa7Dg102467.1	PR9	PER66_ARATH	secretory_peroxidase
chr_7D	22063611	22064886	Fxa7Dg102807.1	PR9	PER5_VITVI	secretory_peroxidase
contig_05	7901	9491	FxaCTg000326.1	PR9	PERN_ARMRU	secretory_peroxidase
chr_3A	17004039	17004343	unannotated:chr_3A_17004039-17004343_3	PR7	SBT16_ARATH	Peptidases_S8_S53
chr_3A	17004340	17004419	unannotated:chr_3A_17004340-17004419_3	PR7	SBT12_ARATH	Peptidases_S8_S53
chr_3A	23151878	23152377	unannotated:chr_3A_23151878-23152377_3	PR7	SBT56_ARATH	fn3_6
chr_3A	27523091	27523395	unannotated:chr_3A_27523091-27523395_3	PR7	SBT16_ARATH	Peptidases_S8_S53
chr_3A	27523392	27523471	unannotated:chr_3A_27523392-27523471_3	PR7	SBT12_ARATH	Peptidases_S8_S53
chr_3C	104364	104956	unannotated:chr_3C_104364-104956_6	PR7	SBT54_ARATH	fn3_6
chr_3C	29015857	29015936	unannotated:chr_3C_29015857-29015936_6	PR7	#N/A	Peptidases_S8_S53
chr_5C	707196	707452	unannotated:chr_5C_707196-707452_6	PR7	SBT14_ARATH	PA_subtilisin_like
chr_6C	30206969	30207273	unannotated:chr_6C_30206969-30207273_3	PR7	SBT16_ARATH	Peptidases_S8_S53
chr_7A	18149106	18149164	unannotated:chr_7A_18149106-18149164_6	PR7	#N/A	fn3_6
chr_7A	18149206	18149369	unannotated:chr_7A_18149206-18149369_6	PR7	SBT4E_ARATH	fn3_6
chr_7C	17982749	17982951	unannotated:chr_7C_17982749-17982951_6	PR7	SBT43_ARATH	Peptidases_S8_S53
chr_7C	17986792	17986892	unannotated:chr_7C_17986792-17986892_6	PR7	CUCM1_CUCME	#N/A
chr_7C	17986878	17987089	unannotated:chr_7C_17986878-17987089_6	PR7	CUCM1_CUCME	Peptidases_S8_S53
chr_7C	7627251	7627765	unannotated:chr_7C_7627251-7627765_6	PR7	SBT_PETHY	Peptidases_S8_S53
chr_1D	18689966	18690243	unannotated:chr_1D_18689966-18690243_6	PR8	CHIA_PHAAN	GH18_chitinase-like
chr_7C	13446176	13446291	unannotated:chr_7C_13446176-13446291_3	PR8	CHIA_CUCSA	GH18_chitinase-like
chr_2A	25095982	25096241	unannotated:chr_2A_25095982-25096241_3	PR9	PER73_ARATH	plant_peroxidase_like

## Sheet: F. vesca Hawaii4
chr	start	end	gene	family	BLAST	domain
Fvb1	8019844	8021340	FvH4_1g14370.t1	PR1	ST14_SOLTU	CAP_PR-1
Fvb1	8022496	8026117	FvH4_1g14371.t1	PR1	ST14_SOLTU	CAP
Fvb1	8026606	8027169	FvH4_1g14380.t1	PR1	ST14_SOLTU	CAP
Fvb2	1773194	1779336	FvH4_2g02120.t1	PR1	PR1A_SOLLC	CAP
Fvb2	1781064	1781914	FvH4_2g02140.t1	PR1	PRB1_TOBAC	CAP_PR-1
Fvb2	2234836	2236151	FvH4_2g02810.t1	PR1	PRB1_TOBAC	CAP_PR-1
Fvb2	2236775	2237835	FvH4_2g02820.t1	PR1	PRB1_ARATH	CAP_PR-1
Fvb2	2248574	2249058	FvH4_2g02850.t1	PR1	PRB1_TOBAC	CAP_PR-1
Fvb2	2250269	2251030	FvH4_2g02860.t1	PR1	PR1C_TOBAC	CAP_PR-1
Fvb2	2259693	2261008	FvH4_2g02880.t1	PR1	PRB1_TOBAC	CAP_PR-1
Fvb2	2261694	2262405	FvH4_2g02890.t1	PR1	PRB1_ARATH	CAP_PR-1
Fvb2	2278657	2279440	FvH4_2g02912.t1	PR1	PR1B_TOBAC	CAP_PR-1
Fvb2	2280341	2281574	FvH4_2g02920.t1	PR1	PRB1_ARATH	CAP_PR-1
Fvb2	2282673	2283455	FvH4_2g02921.t1	PR1	PRB1_TOBAC	CAP_PR-1
Fvb2	2284521	2284949	FvH4_2g02930.t1	PR1	PR06_SOLLC	CAP
Fvb2	2285803	2286225	FvH4_2g02940.t1	PR1	PR06_SOLLC	CAP_PR-1
Fvb2	2297260	2297739	FvH4_2g02950.t1	PR1	PR1B_TOBAC	CAP_PR-1
Fvb2	5778296	5779079	FvH4_2g07020.t1	PR1	PR1B_TOBAC	CAP_PR-1
Fvb2	14656000	14656848	FvH4_2g16860.t1	PR1	PRB1_TOBAC	CAP_PR-1
Fvb3	5736758	5739177	FvH4_3g09840.t1	PR1	PRB1_TOBAC	CAP
Fvb3	6892050	6892718	FvH4_3g11680.t1	PR1	PR1_MEDTR	CAP_PR-1
Fvb4	12254391	12255493	FvH4_4g09940.t1	PR1	PR1_MEDTR	CAP_PR-1
Fvb4	12254439	12256995	FvH4_4g09950.t1	PR1	PR1_MEDTR	CAP_PR-1
Fvb2	21026500	21027722	FvH4_2g26151.t1	PR10	PRU1_PRUAR	Bet_v1-like
Fvb4	22641365	22641847	FvH4_4g18830.t1	PR10	FRA14_FRAAN	Bet_v1-like
Fvb4	22642317	22643514	FvH4_4g18850.t1	PR10	FRA18_FRAAN	Bet_v1-like
Fvb4	22644035	22644901	FvH4_4g18851.t1	PR10	FRA15_FRAAN	Bet_v1-like
Fvb4	22714193	22715298	FvH4_4g18951.t1	PR10	FRA17_FRAAN	Bet_v1-like
Fvb4	22716451	22717806	FvH4_4g18960.t1	PR10	PRU1_PRUAR	Bet_v1-like
Fvb4	22719273	22721799	FvH4_4g18970.t1	PR10	PRU1_PRUAR	Bet_v1-like
Fvb4	22753753	22754720	FvH4_4g18990.t1	PR10	FRA1A_FRAAN	Bet_v1-like
Fvb4	22758408	22759459	FvH4_4g19000.t1	PR10	FRA15_FRAAN	Bet_v1-like
Fvb4	22760901	22762009	FvH4_4g19010.t1	PR10	FRA13_FRAAN	Bet_v1-like
Fvb4	22764076	22764558	FvH4_4g19020.t1	PR10	FRA17_FRAAN	Bet_v1-like
Fvb4	22765564	22766987	FvH4_4g19040.t1	PR10	FRA18_FRAAN	Bet_v1-like
Fvb4	22768259	22769333	FvH4_4g19050.t1	PR10	FRA13_FRAAN	Bet_v1-like
Fvb4	22770441	22771211	FvH4_4g19060.t1	PR10	FRA15_FRAAN	Bet_v1-like
Fvb4	22773389	22774051	FvH4_4g19080.t1	PR10	FRA16_FRAAN	Bet_v1-like
Fvb4	22829929	22830411	FvH4_4g19120.t1	PR10	FRA12_FRAAN	Bet_v1-like
Fvb4	22888923	22890043	FvH4_4g19170.t1	PR10	FRA13_FRAAN	Bet_v1-like
Fvb4	23262221	23262703	FvH4_4g19700.t1	PR10	FRA17_FRAAN	Bet_v1-like
Fvb4	23263140	23264081	FvH4_4g19710.t1	PR10	FRA14_FRAAN	Bet_v1-like
Fvb5	435379	435861	FvH4_5g00780.t1	PR10	FRA18_FRAAN	Bet_v1-like
Fvb1	666217	667933	FvH4_1g01321.t1	PR11	CHIC_ARATH	GH18_plant_chitinase_class_V
Fvb1	674481	674846	FvH4_1g01340.t1	PR11	CHIC_ARATH	GH18_chitinase-like
Fvb1	675662	678882	FvH4_1g01350.t1	PR11	CRK7_ARATH	GH18_plant_chitinase_class_V
Fvb1	684018	685259	FvH4_1g01362.t1	PR11	CHIC_ARATH	GH18_plant_chitinase_class_V
Fvb1	695224	695885	FvH4_1g01364.t1	PR11	CHIC_ARATH	GH18_chitinase-like
Fvb1	697349	699456	FvH4_1g01365.t1	PR11	CRK7_ARATH	STKc_IRAK
Fvb1	704049	705271	FvH4_1g01382.t1	PR11	CHIC_ARATH	GH18_plant_chitinase_class_V
Fvb1	706695	707069	FvH4_1g01383.t1	PR11	CHIC_ARATH	GH18_chitinase-like
Fvb1	712986	715661	FvH4_1g01420.t1	PR11	CRK7_ARATH	STKc_IRAK
Fvb2	29032018	29034988	FvH4_2g40880.t1	PR11	CHT5A_MEDTR	GH18_plant_chitinase_class_V
Fvb1	668608	669017	unannotated:Fvb1_668608-669017_3	PR11	CHIC_ARATH	GH18_chitinase-like
Fvb1	669056	669198	unannotated:Fvb1_669056-669198_3	PR11	CHIC_ARATH	GH18_chitinase-like
Fvb1	672147	672373	unannotated:Fvb1_672147-672373_3	PR11	CHIC_ARATH	GH18_chitinase-like
Fvb1	675018	675121	unannotated:Fvb1_675018-675121_3	PR11	#N/A	GH18_chitinase-like
Fvb1	689041	690083	unannotated:Fvb1_689041-690083_3	PR11	CHIC_ARATH	GH18_plant_chitinase_class_V
Fvb1	692890	693116	unannotated:Fvb1_692890-693116_3	PR11	CHIC_ARATH	GH18_chitinase-like
Fvb1	696553	697121	unannotated:Fvb1_696553-697121_3	PR11	CHIC_ARATH	GH18_chitinase-like
Fvb1	723869	724893	unannotated:Fvb1_723869-724893_3	PR11	CHT5A_MEDTR	GH18_plant_chitinase_class_V
Fvb2	10029650	10029792	unannotated:Fvb2_10029650-10029792_6	PR12	DEF1_DAHME	#N/A
Fvb2	28356707	28356867	unannotated:Fvb2_28356707-28356867_3	PR12	DEF19_ARATH	Knot1
Fvb3	583050	583881	FvH4_3g01190.t1	PR14	NLTP1_ORYSJ	nsLTP1
Fvb3	34155558	34156554	FvH4_3g40460.t1	PR14	NLTP_LACSA	nsLTP1
Fvb6	5909111	5910089	FvH4_6g09960.t1	PR14	NLTP3_PRUDU	nsLTP1
Fvb6	5915391	5916137	FvH4_6g09970.t1	PR14	NLTP1_PRUDU	nsLTP1
Fvb6	5928649	5929566	FvH4_6g09980.t1	PR14	NLTP_PRUAV	nsLTP1
Fvb6	5931924	5933005	FvH4_6g09990.t1	PR14	NLTP3_LENCU	nsLTP1
Fvb7	9484612	9484953	FvH4_7g10020.t1	PR14	NLTPA_RICCO	nsLTP1
Fvb7	14003542	14004503	FvH4_7g16320.t1	PR14	NLTP8_HORVU	nsLTP1
Fvb7	21057419	21058459	FvH4_7g28420.t1	PR14	NLTP3_PRUDU	nsLTP1
Fvb1	3924292	3925056	FvH4_1g07400.t1	PR16	AB19A_PRUPE	cupin_OxOx
Fvb1	4522373	4523314	FvH4_1g08531.t1	PR16	AB19A_PRUPE	cupin_OxOx
Fvb1	4525527	4528416	FvH4_1g08540.t1	PR16	ABP20_PRUPE	cupin_OxOx
Fvb1	4530241	4531179	FvH4_1g08541.t1	PR16	AB19A_PRUPE	cupin_OxOx
Fvb1	4534369	4535010	FvH4_1g08550.t1	PR16	AB19A_PRUPE	cupin_OxOx
Fvb1	4546537	4547178	FvH4_1g08570.t1	PR16	AB19B_PRUPE	cupin_OxOx
Fvb1	10574446	10575986	FvH4_1g18170.t1	PR16	AB19A_PRUPE	cupin_OxOx
Fvb1	10936916	10937852	FvH4_1g18630.t1	PR16	AB19A_PRUPE	cupin_OxOx
Fvb2	5382697	5383516	FvH4_2g06460.t1	PR16	AB19B_PRUPE	cupin_OxOx
Fvb2	9095421	9097377	FvH4_2g10250.t1	PR16	GL118_ARATH	cupin_OxOx
Fvb3	5020182	5021049	FvH4_3g08590.t1	PR16	GL93_ORYSJ	cupin_OxOx
Fvb3	5022612	5023238	FvH4_3g08600.t1	PR16	GL93_ORYSJ	cupin_OxOx
Fvb3	5965665	5966482	FvH4_3g10240.t1	PR16	GL22_ORYSJ	cupin_OxOx
Fvb3	6340114	6341567	FvH4_3g10630.t1	PR16	GL21_ORYSJ	cupin_OxOx
Fvb3	6341855	6342902	FvH4_3g10640.t1	PR16	GL21_ORYSJ	cupin_OxOx
Fvb3	6343393	6354871	FvH4_3g10650.t1	PR16	GL21_ORYSJ	cupin_OxOx
Fvb3	6357025	6357775	FvH4_3g10670.t1	PR16	GL21_ORYSJ	cupin_OxOx
Fvb3	6386500	6387054	FvH4_3g10730.t1	PR16	GL22_ORYSJ	cupin_OxOx
Fvb3	6941866	6942749	FvH4_3g11751.t1	PR16	GL23_ORYSJ	cupin_RmlC-like
Fvb3	13434567	13436012	FvH4_3g20400.t1	PR16	GL111_ARATH	cupin_OxOx
Fvb3	18250729	18251289	FvH4_3g25280.t1	PR16	GL93_ORYSJ	cupin_OxOx
Fvb3	18260104	18260661	FvH4_3g25310.t1	PR16	GL93_ORYSJ	cupin_OxOx
Fvb3	18272555	18275061	FvH4_3g25320.t1	PR16	GL93_ORYSJ	cupin_OxOx
Fvb3	18278584	18279339	FvH4_3g25340.t1	PR16	GL93_ORYSJ	cupin_OxOx
Fvb4	32608958	32609984	FvH4_4g35250.t1	PR16	GL11_ARATH	cupin_OxOx
Fvb5	5695530	5696479	FvH4_5g09990.t1	PR16	GL34_ARATH	cupin_OxOx
Fvb5	9070431	9072834	FvH4_5g15980.t1	PR16	GLT2_ARATH	cupin_OxOx
Fvb5	9075374	9077168	FvH4_5g15981.t1	PR16	GLT2_ARATH	cupin_OxOx
Fvb5	10375223	10376276	FvH4_5g18050.t1	PR16	GL118_ARATH	cupin_OxOx
Fvb5	10382378	10383198	FvH4_5g18070.t1	PR16	GL118_ARATH	cupin_OxOx
Fvb5	10627617	10641181	FvH4_5g18460.t1	PR16	GL17_ARATH	cupin_OxOx
Fvb5	10644216	10644617	FvH4_5g18470.t1	PR16	GL18_ARATH	cupin_RmlC-like
Fvb5	10644725	10645039	FvH4_5g18471.t1	PR16	GL17_ARATH	cupin_OxOx
Fvb5	20227869	20229520	FvH4_5g29170.t1	PR16	GL21_ORYSJ	cupin_OxOx
Fvb6	5198041	5199658	FvH4_6g08730.t1	PR16	GL52_ORYSJ	cupin_OxOx
Fvb6	5202283	5203871	FvH4_6g08740.t1	PR16	GL52_ORYSJ	cupin_OxOx
Fvb6	12258333	12259153	FvH4_6g18500.t1	PR16	GL32_ARATH	cupin_OxOx
Fvb7	8260996	8261406	FvH4_7g08370.t1	PR16	GL93_ORYSJ	cupin_OxOx
Fvb7	8288398	8288991	FvH4_7g08383.t1	PR16	GL93_ORYSJ	cupin_OxOx
Fvb7	8291087	8292114	FvH4_7g08390.t1	PR16	GL92_ORYSJ	cupin_OxOx
Fvb4	389954	390138	unannotated:Fvb4_389954-390138_3	PR16	GL18_ARATH	cupin_RmlC-like
Fvb2	4050402	4051980	FvH4_2g05000.t1	PR17	BSP_BOSSE	BSP
Fvb2	4072484	4073246	FvH4_2g05010.t1	PR17	BSP_BOSSE	BSP
Fvb2	4075063	4076390	FvH4_2g05020.t1	PR17	BSP_BOSSE	BSP
Fvb2	4083308	4083767	FvH4_2g05030.t1	PR17	BSP_BOSSE	BSP
Fvb6	30280918	30281867	FvH4_6g38280.t1	PR17	#N/A	BSP
Fvb2	220040	221698	FvH4_2g00110.t1	PR18	BBLD2_TOBAC	FAD_binding_4
Fvb3	6438690	6440285	FvH4_3g10830.t1	PR18	BBE22_ARATH	GlcD
Fvb3	6448750	6450700	FvH4_3g10860.t1	PR18	STOX_BERWI	GlcD
Fvb3	6464566	6466203	FvH4_3g10920.t1	PR18	BBE15_ARATH	GlcD
Fvb3	6472595	6474213	FvH4_3g10930.t1	PR18	STOX_BERWI	BBE
Fvb3	6479010	6489409	FvH4_3g10940.t1	PR18	STOX_BERWI	GlcD
Fvb3	6479631	6481211	FvH4_3g10941.t1	PR18	STOX_BERWI	GlcD
Fvb3	6490125	6493462	FvH4_3g10960.t1	PR18	BBE21_ARATH	FAD_binding_4
Fvb3	6496717	6498333	FvH4_3g10990.t1	PR18	BBE21_ARATH	FAD_binding_4
Fvb3	6502288	6503928	FvH4_3g11010.t1	PR18	BBE21_ARATH	BBE
Fvb3	6508821	6510693	FvH4_3g11041.t1	PR18	BBE14_ARATH	BBE
Fvb3	6511311	6512335	FvH4_3g11042.t1	PR18	FOX1_ARATH	BBE
Fvb3	6515369	6516781	FvH4_3g11043.t1	PR18	FOX5_ARATH	BBE
Fvb3	6519218	6520939	FvH4_3g11044.t1	PR18	FOX2_ARATH	GlcD
Fvb3	6533454	6535055	FvH4_3g11090.t1	PR18	BBE17_ARATH	GlcD
Fvb3	6652591	6654759	FvH4_3g11300.t1	PR18	BBE8_ARATH	GlcD
Fvb3	6678550	6680721	FvH4_3g11330.t1	PR18	BBE8_ARATH	GlcD
Fvb3	6442040	6443544	unannotated:Fvb3_6442040-6443544_3	PR18	BBE13_ARATH	BBE
Fvb3	6457965	6459472	unannotated:Fvb3_6457965-6459472_6	PR18	BBE13_ARATH	BBE
Fvb3	6461210	6462717	unannotated:Fvb3_6461210-6462717_6	PR18	BBE13_ARATH	BBE
Fvb3	6487681	6489161	unannotated:Fvb3_6487681-6489161_6	PR18	BBE13_ARATH	BBE
Fvb1	1681067	1683579	FvH4_1g02990.t1	PR2	E1314_ARATH	Glyco_hydro
Fvb1	2849738	2852153	FvH4_1g05390.t1	PR2	E138_ARATH	Glyco_hydro
Fvb1	3401805	3405257	FvH4_1g06440.t1	PR2	E1313_ARATH	Glyco_hydro
Fvb1	4519684	4520703	FvH4_1g08530.t1	PR2	BG5_ARATH	Glyco_hydro
Fvb1	5171630	5173762	FvH4_1g09660.t1	PR2	E135_ARATH	Glyco_hydro
Fvb1	10138738	10141816	FvH4_1g17490.t1	PR2	E1313_ARATH	X8
Fvb1	14875907	14878664	FvH4_1g22980.t1	PR2	E138_ARATH	Glyco_hydro
Fvb1	14879091	14881126	FvH4_1g22990.t1	PR2	E138_ARATH	Glyco_hydro
Fvb1	19817962	19821230	FvH4_1g28000.t1	PR2	E138_ARATH	Glyco_hydro
Fvb1	24081371	24087364	FvH4_1g30380.t1	PR2	E132_ARATH	Glyco_hydro
Fvb2	7608602	7613370	FvH4_2g08690.t1	PR2	E137_ARATH	Glyco_hydro
Fvb2	15566031	15567613	FvH4_2g18182.t1	PR2	EA6_ARATH	Glyco_hydro
Fvb2	15567683	15568104	FvH4_2g18190.t1	PR2	EA6_ARATH	Glyco_hydro
Fvb2	15584353	15587331	FvH4_2g18200.t1	PR2	EA6_ARATH	Glyco_hydro
Fvb2	23650743	23653876	FvH4_2g30580.t1	PR2	E135_ARATH	Glyco_hydro
Fvb2	28514940	28517472	FvH4_2g39880.t1	PR2	E137_ARATH	Glyco_hydro
Fvb3	111735	114966	FvH4_3g00190.t1	PR2	E135_ARATH	Glyco_hydro
Fvb3	962029	965180	FvH4_3g01880.t1	PR2	E131_ARATH	Glyco_hydro
Fvb3	3132865	3133984	FvH4_3g05400.t1	PR2	E1313_ARATH	Glyco_hydro
Fvb3	3213904	3216099	FvH4_3g05490.t1	PR2	E1311_ARATH	Glyco_hydro
Fvb3	6635614	6636138	FvH4_3g11270.t1	PR2	E13B_VITVI	Glyco_hydro
Fvb3	16444569	16446863	FvH4_3g23410.t1	PR2	E1313_ARATH	Glyco_hydro
Fvb3	17980478	17982894	FvH4_3g24930.t1	PR2	E1314_ARATH	Glyco_hydro
Fvb3	21335104	21337223	FvH4_3g28370.t1	PR2	E13B_VITVI	Glyco_hydro
Fvb3	21348320	21349336	FvH4_3g28390.t1	PR2	E13B_HEVBR	Glyco_hydro
Fvb3	30985217	30987762	FvH4_3g36150.t1	PR2	E13B_WHEAT	Glyco_hydro
Fvb3	33592260	33594969	FvH4_3g39500.t1	PR2	E139_ARATH	Glyco_hydro
Fvb3	37625087	37629542	FvH4_3g45330.t1	PR2	E134_ARATH	Glyco_hydro
Fvb4	64030	67960	FvH4_4g00080.t1	PR2	E136_ARATH	Glyco_hydro
Fvb4	16727027	16728747	FvH4_4g13120.t1	PR2	EA6_ARATH	Glyco_hydro
Fvb4	23149635	23152234	FvH4_4g19500.t1	PR2	E13B_HEVBR	Glyco_hydro_17
Fvb4	29759829	29761378	FvH4_4g29750.t1	PR2	E1314_ARATH	Glyco_hydro
Fvb4	29765460	29767737	FvH4_4g29790.t1	PR2	E1311_ARATH	Glyco_hydro
Fvb4	29781306	29783061	FvH4_4g29811.t1	PR2	E1311_ARATH	Glyco_hydro
Fvb4	29783106	29783852	FvH4_4g29820.t1	PR2	E1314_ARATH	Glyco_hydro
Fvb4	29928380	29931200	FvH4_4g30150.t1	PR2	E13B_VITVI	Glyco_hydro
Fvb4	31921752	31926438	FvH4_4g33870.t1	PR2	E133_ARATH	Glyco_hydro
Fvb4	32147069	32148133	FvH4_4g34270.t1	PR2	BGNEM_ARATH	Glyco_hydro
Fvb5	3658626	3660274	FvH4_5g06210.t1	PR2	E13B_PRUPE	Glyco_hydro
Fvb5	6021151	6025569	FvH4_5g10600.t1	PR2	E1311_ARATH	Glyco_hydro
Fvb5	14361867	14367436	FvH4_5g23000.t1	PR2	E1314_ARATH	Glyco_hydro
Fvb5	17239172	17241295	FvH4_5g25740.t1	PR2	E1312_ARATH	Glyco_hydro
Fvb6	18694395	18695955	FvH4_6g24640.t1	PR2	E13B_PRUPE	Glyco_hydro
Fvb6	18714139	18715923	FvH4_6g24680.t1	PR2	E13B_PRUPE	Glyco_hydro
Fvb6	23037578	23039684	FvH4_6g29810.t1	PR2	E1314_ARATH	Glyco_hydro
Fvb6	29298210	29299676	FvH4_6g37200.t1	PR2	E13B_PRUPE	Glyco_hydro
Fvb6	29302045	29302615	FvH4_6g37201.t1	PR2	E13B_PRUPE	Glyco_hydro
Fvb6	29426236	29427276	FvH4_6g37370.t1	PR2	E13H_TOBAC	Glyco_hydro
Fvb6	32981870	32984593	FvH4_6g42190.t1	PR2	E133_ARATH	Glyco_hydro
Fvb7	3347952	3349188	FvH4_7g03000.t1	PR2	BG4_ARATH	Glyco_hydro
Fvb7	17687797	17690129	FvH4_7g22480.t1	PR2	E13B_WHEAT	Glyco_hydro
Fvb7	17703222	17705175	FvH4_7g22494.t1	PR2	E13B_WHEAT	Glyco_hydro
Fvb7	18527648	18529277	FvH4_7g23880.t1	PR2	E132_ARATH	Glyco_hydro
Fvb7	23113181	23115317	FvH4_7g32100.t1	PR2	E13B_WHEAT	Glyco_hydro
Fvb1	4518598	4518914	unannotated:Fvb1_4518598-4518914_6	PR2	BG4_ARATH	Glyco_hydro
Fvb1	5814253	5821459	FvH4_1g10640.t1	PR3	CHIX_PEA	Glyco_hydro_19
Fvb1	5823481	5824801	FvH4_1g10641.t1	PR3	CHIX_PEA	Glyco_hydro_19
Fvb1	5826812	5827918	FvH4_1g10642.t1	PR3	CHIX_PEA	Glyco_hydro_19
Fvb1	5830126	5831442	FvH4_1g10643.t1	PR3	CHIX_PEA	Glyco_hydro_19
Fvb1	5833455	5834561	FvH4_1g10650.t1	PR3	CHIX_PEA	Glyco_hydro_19
Fvb1	5836748	5838246	FvH4_1g10660.t1	PR3	CHIX_PEA	Glyco_hydro_19
Fvb1	5839479	5841409	FvH4_1g10661.t1	PR3	CHIX_PEA	Glyco_hydro_19
Fvb1	18038965	18040459	FvH4_1g26180.t1	PR3	CHI10_ORYSJ	Glyco_hydro_19
Fvb2	14149403	14151409	FvH4_2g16190.t1	PR3	CHI5_PHAVU	Glyco_hydro_19
Fvb2	24174059	24175361	FvH4_2g31570.t1	PR3	CHI5_ARATH	chitinase_GH19
Fvb4	14333813	14335110	FvH4_4g10600.t1	PR3	CHI5_ARATH	chitinase_GH19
Fvb4	14349198	14350693	FvH4_4g10610.t1	PR3	CHI5_ARATH	chitinase_GH19
Fvb4	14360249	14372992	FvH4_4g10640.t1	PR3	CHI5_ARATH	chitinase_GH19
Fvb4	15646303	15649212	FvH4_4g11930.t1	PR3	CTL1_ARATH	chitinase_GH19
Fvb4	23039926	23042026	FvH4_4g19370.t1	PR3	CTL2_ARATH	chitinase_GH19
Fvb5	18521572	18523643	FvH4_5g27250.t1	PR3	CHI10_ORYSJ	Glyco_hydro_19
Fvb3	18834910	18835265	unannotated:Fvb3_18834910-18835265_3	PR4	PR4B_TOBAC	DPBB_barwin-like
Fvb1	6398777	6400392	FvH4_1g11710.t1	PR5	THLP1_ARATH	TLP-PA
Fvb1	6406017	6408185	FvH4_1g11720.t1	PR5	THLP1_ARATH	Thaumatin
Fvb2	1401024	1403397	FvH4_2g01540.t1	PR5	THLP1_ARATH	TLP-PA
Fvb2	1412361	1415495	FvH4_2g01560.t1	PR5	THLP1_ARATH	Thaumatin
Fvb2	15991730	15992065	FvH4_2g18720.t1	PR5	TLP_PRUAV	Thaumatin
Fvb2	21203446	21205204	FvH4_2g26400.t1	PR5	CRJ35_CRYJA	TLP-PA
Fvb2	27738298	27740679	FvH4_2g38310.t1	PR5	THLP1_ARATH	TLP-PA
Fvb2	27744579	27747672	FvH4_2g38320.t1	PR5	THLP1_ARATH	TLP-PA
Fvb2	28739508	28740775	FvH4_2g40300.t1	PR5	CRJ35_CRYJA	TLP-PA
Fvb3	5577512	5578201	FvH4_3g09590.t1	PR5	TLP_ACTCC	GH64-TLP-SF
Fvb3	17546152	17550940	FvH4_3g24510.t1	PR5	TLP1_PRUPE	GH64-TLP-SF
Fvb3	30601914	30607090	FvH4_3g35670.t1	PR5	OLP1_SOLLC	TLP-PA
Fvb4	3633286	3634593	FvH4_4g04210.t1	PR5	TLP1_PRUPE	TLP-PA
Fvb5	1148959	1150906	FvH4_5g01810.t1	PR5	TLP_ACTCC	THN
Fvb5	1151365	1152637	FvH4_5g01820.t1	PR5	TLP_ACTCC	GH64-TLP-SF
Fvb5	1152638	1153704	FvH4_5g01830.t1	PR5	TLP_ACTCC	GH64-TLP-SF
Fvb5	1155722	1158056	FvH4_5g01840.t1	PR5	OSL3_ARATH	THN
Fvb5	3666528	3669015	FvH4_5g06220.t1	PR5	TLP_PRUAV	TLP-PA
Fvb5	3671127	3672065	FvH4_5g06230.t1	PR5	TLP_PRUAV	GH64-TLP-SF
Fvb5	9856748	9858249	FvH4_5g17260.t1	PR5	TLPH_ARATH	TLP-PA
Fvb6	3343580	3344726	FvH4_6g05880.t1	PR5	TLP_PRUAV	TLP-PA
Fvb6	8067254	8068367	FvH4_6g13270.t1	PR5	TLPH_ORYSJ	Thaumatin
Fvb6	10815317	10816866	FvH4_6g16950.t1	PR5	TP1A_MALDO	TLP-PA
Fvb6	18707201	18708031	FvH4_6g24660.t1	PR5	TLP1_PRUPE	GH64-TLP-SF
Fvb6	18708661	18710045	FvH4_6g24670.t1	PR5	TLP_PRUAV	TLP-PA
Fvb6	37130492	37131632	FvH4_6g49590.t1	PR5	TLPH_ARATH	TLP-PA
Fvb7	17984597	17985785	FvH4_7g22890.t1	PR5	TLPH_ORYSJ	Thaumatin
Fvb7	18754595	18757882	FvH4_7g24270.t1	PR5	PR5K_ARATH	Thaumatin
Fvb7	18773233	18776164	FvH4_7g24280.t1	PR5	PR5K_ARATH	STKc_IRAK
Fvb7	18777530	18778789	FvH4_7g24290.t1	PR5	PR5K_ARATH	Thaumatin
Fvb7	18780544	18783656	FvH4_7g24291.t1	PR5	PR5K_ARATH	Thaumatin
Fvb7	18793111	18796173	FvH4_7g24300.t1	PR5	PR5K_ARATH	Thaumatin
Fvb7	23711545	23712789	FvH4_7g33310.t1	PR5	THLP1_ARATH	GH64-TLP-SF
Fvb2	15992080	15992297	unannotated:Fvb2_15992080-15992297_6	PR5	PR5K_ARATH	GH64-TLP-SF
Fvb1	4701057	4704056	FvH4_1g08840.t1	PR7	SBT18_ARATH	Peptidases_S8_3
Fvb1	5018516	5019057	FvH4_1g09350.t1	PR7	SBT3_SOLLC	Peptidases_S8_S53
Fvb1	5322357	5326694	FvH4_1g09800.t1	PR7	SBTS_LOTJA	Peptidases_S8_3
Fvb1	9262202	9263527	FvH4_1g16171.t1	PR7	SBT3_SOLLC	Peptidases_S8_S53
Fvb1	9266583	9269633	FvH4_1g16180.t1	PR7	SBT19_ARATH	Peptidases_S8_3
Fvb1	9922976	9925261	FvH4_1g17150.t1	PR7	SBT17_ARATH	Peptidases_S8_3
Fvb1	17108213	17110864	FvH4_1g25350.t1	PR7	SBT17_ARATH	Peptidases_S8_3
Fvb2	1304333	1306642	FvH4_2g01410.t1	PR7	SBT16_ARATH	Peptidases_S8_3
Fvb2	4188621	4190226	FvH4_2g05130.t1	PR7	SBT44_ARATH	PA_subtilisin_like
Fvb2	9050349	9056896	FvH4_2g10210.t1	PR7	SBT36_ARATH	Peptidases_S8_3
Fvb2	17178053	17180629	FvH4_2g20460.t1	PR7	SBT12_ARATH	Peptidases_S8_3
Fvb2	25037656	25040995	FvH4_2g33321.t1	PR7	SBT17_ARATH	Peptidases_S8_3
Fvb2	25041615	25044176	FvH4_2g33340.t1	PR7	SBT17_ARATH	Peptidases_S8_3
Fvb2	25430198	25432477	FvH4_2g34120.t1	PR7	SBT17_ARATH	Peptidases_S8_3
Fvb2	25434182	25435954	FvH4_2g34130.t1	PR7	SBT3_SOLLC	Peptidases_S8_3
Fvb2	25437678	25439951	FvH4_2g34150.t1	PR7	SBT3_SOLLC	Peptidases_S8_3
Fvb2	25445260	25448355	FvH4_2g34170.t1	PR7	SBT3_SOLLC	Peptidases_S8_3
Fvb2	25462420	25465899	FvH4_2g34210.t1	PR7	SBT18_ARATH	Peptidases_S8_3
Fvb2	25467305	25468453	FvH4_2g34211.t1	PR7	SBT16_ARATH	fn3_6
Fvb2	25468506	25469564	FvH4_2g34212.t1	PR7	SBT3_SOLLC	Peptidases_S8_3
Fvb2	25472627	25475400	FvH4_2g34230.t1	PR7	SBT3_SOLLC	Peptidases_S8_3
Fvb3	96933	99400	FvH4_3g00161.t1	PR7	SBT54_ARATH	fn3_6
Fvb3	732803	736725	FvH4_3g01420.t1	PR7	SBT24_ARATH	Peptidases_S8_3
Fvb3	3777724	3784949	FvH4_3g06570.t1	PR7	SBT56_ARATH	Peptidases_S8_3
Fvb3	6812531	6819449	FvH4_3g11550.t1	PR7	SBT22_ARATH	Peptidases_S8_3
Fvb3	12606860	12607408	FvH4_3g19440.t1	PR7	SBT16_ARATH	Peptidases_S8_S53
Fvb3	17674254	17679887	FvH4_3g24600.t1	PR7	SBTS_LOTJA	Peptidases_S8_3
Fvb3	28618094	28623630	FvH4_3g33200.t1	PR7	SBT56_ARATH	Peptidases_S8_3
Fvb3	31843323	31844731	FvH4_3g37161.t1	PR7	SBT46_ARATH	Peptidases_S8_S53
Fvb3	31849045	31852432	FvH4_3g37170.t1	PR7	SBT46_ARATH	Peptidases_S8_3
Fvb3	35151608	35155598	FvH4_3g42040.t1	PR7	SBT54_ARATH	Peptidases_S8_3
Fvb3	35155908	35158993	FvH4_3g42041.t1	PR7	AIR3_ARATH	Peptidases_S8_3
Fvb3	35357548	35361466	FvH4_3g42350.t1	PR7	SBT54_ARATH	Peptidases_S8_3
Fvb3	38011327	38014893	FvH4_3g45830.t1	PR7	SBT3I_ARATH	Peptidases_S8_3
Fvb4	6744868	6753268	FvH4_4g07370.t1	PR7	SBT26_ARATH	Peptidases_S8_3
Fvb5	675526	678160	FvH4_5g01091.t1	PR7	SBT4_LOTJA	Peptidases_S8_3
Fvb5	680809	686397	FvH4_5g01092.t1	PR7	SBT4_LOTJA	Peptidases_S8_3
Fvb5	687597	690260	FvH4_5g01093.t1	PR7	SBT3_LOTJA	Peptidases_S8_3
Fvb5	691552	693789	FvH4_5g01120.t1	PR7	SBT4_LOTJA	Peptidases_S8_3
Fvb5	5958591	5965110	FvH4_5g10480.t1	PR7	SBT36_ARATH	Peptidases_S8_3
Fvb5	5963807	5969111	FvH4_5g10490.t1	PR7	SBT36_ARATH	Peptidases_S8_3
Fvb5	5972525	5976224	FvH4_5g10502.t1	PR7	SBT33_ARATH	Peptidases_S8_3
Fvb6	578612	580921	FvH4_6g01060.t1	PR7	SBT3_SOLLC	Peptidases_S8_3
Fvb6	583141	585438	FvH4_6g01061.t1	PR7	SBT3_SOLLC	Peptidases_S8_3
Fvb6	27661882	27664203	FvH4_6g35010.t1	PR7	SBT14_ARATH	Peptidases_S8_3
Fvb6	28166367	28168998	FvH4_6g35680.t1	PR7	SBT15_ARATH	Peptidases_S8_S53
Fvb6	31800900	31806327	FvH4_6g40300.t1	PR7	AIR3_ARATH	Peptidases_S8_3
Fvb7	3156479	3158678	FvH4_7g02830.t1	PR7	SBT46_ARATH	Peptidases_S8_3
Fvb7	3167223	3169640	FvH4_7g02840.t1	PR7	SBT46_ARATH	Peptidases_S8_3
Fvb7	5145067	5152760	FvH4_7g04630.t1	PR7	CRSP_ARATH	Peptidases_S8_3
Fvb7	8292748	8294883	FvH4_7g08400.t1	PR7	SBT3_LOTJA	Peptidases_S8_3
Fvb7	11555647	11564344	FvH4_7g12740.t1	PR7	SBT4E_ARATH	Peptidases_S8_3
Fvb7	18567587	18571193	FvH4_7g23950.t1	PR7	SBT46_ARATH	Peptidases_S8_3
Fvb7	21128660	21131782	FvH4_7g28501.t1	PR7	SBT13_ARATH	Peptidases_S8_3
Fvb7	21136705	21137526	FvH4_7g28511.t1	PR7	SBT13_ARATH	fn3_6
Fvb7	1327755	1328230	unannotated:Fvb7_1327755-1328230_6	PR7	SBT3_SOLLC	fn3_6
Fvb7	19722283	19722446	unannotated:Fvb7_19722283-19722446_6	PR7	SBT4E_ARATH	fn3_6
Fvb7	8372654	8372817	unannotated:Fvb7_8372654-8372817_6	PR7	SBT12_ARATH	Peptidases_S8_S53
Fvb6	32198824	32199650	unannotated:Fvb6_32198824-32199650_3	PR8	CHLY_HEVBR	GH18_hevamine_XipI_class_III
Fvb7	13452039	13452862	unannotated:Fvb7_13452039-13452862_3	PR8	CHLY_HEVBR	GH18_hevamine_XipI_class_III
Fvb7	13524947	13525770	unannotated:Fvb7_13524947-13525770_6	PR8	CHIB_TOBAC	GH18_hevamine_XipI_class_III
Fvb7	13530840	13531660	unannotated:Fvb7_13530840-13531660_6	PR8	CHIB_TOBAC	GH18_hevamine_XipI_class_III
Fvb7	22083753	22084585	unannotated:Fvb7_22083753-22084585_3	PR8	CHIA_ARATH	GH18_hevamine_XipI_class_III
Fvb7	22339709	22340562	unannotated:Fvb7_22339709-22340562_6	PR8	CHIA_ARATH	GH18_hevamine_XipI_class_III
Fvb1	1798752	1800487	FvH4_1g03202.t1	PR9	PER25_ARATH	secretory_peroxidase
Fvb1	6127944	6129911	FvH4_1g11220.t1	PR9	PER64_ARATH	secretory_peroxidase
Fvb1	6860970	6863057	FvH4_1g12490.t1	PR9	PER72_ARATH	secretory_peroxidase
Fvb1	8829058	8830926	FvH4_1g15550.t1	PR9	PER10_ARATH	secretory_peroxidase
Fvb1	8832073	8833906	FvH4_1g15551.t1	PR9	PER10_ARATH	secretory_peroxidase
Fvb1	10026943	10029533	FvH4_1g17340.t1	PR9	PER73_ARATH	secretory_peroxidase
Fvb1	12563991	12565582	FvH4_1g20350.t1	PR9	PER17_ARATH	secretory_peroxidase
Fvb1	12568186	12570455	FvH4_1g20360.t1	PR9	PER17_ARATH	secretory_peroxidase
Fvb2	4429530	4431253	FvH4_2g05370.t1	PR9	PER44_ARATH	secretory_peroxidase
Fvb2	5660756	5663011	FvH4_2g06860.t1	PR9	PER10_ARATH	secretory_peroxidase
Fvb2	9283942	9286932	FvH4_2g10460.t1	PR9	PER19_ARATH	secretory_peroxidase
Fvb2	11492094	11495820	FvH4_2g13110.t1	PR9	PER12_ARATH	secretory_peroxidase
Fvb2	21349075	21350977	FvH4_2g26620.t1	PR9	PER3_ARATH	secretory_peroxidase
Fvb2	23216840	23217619	FvH4_2g29970.t1	PR9	PERX_NICSY	plant_peroxidase_like
Fvb2	23631963	23634423	FvH4_2g30540.t1	PR9	PERX_NICSY	secretory_peroxidase
Fvb2	26925013	26927624	FvH4_2g36870.t1	PR9	PER45_ARATH	secretory_peroxidase
Fvb2	28259851	28261461	FvH4_2g39290.t1	PR9	PER9_ARATH	secretory_peroxidase
Fvb2	29271916	29273718	FvH4_2g41361.t1	PR9	PER46_ARATH	secretory_peroxidase
Fvb3	1061045	1063286	FvH4_3g02090.t1	PR9	PER42_ARATH	secretory_peroxidase
Fvb3	1378211	1380130	FvH4_3g02700.t1	PR9	PER27_ARATH	secretory_peroxidase
Fvb3	7917856	7919757	FvH4_3g13260.t1	PR9	PER7_ARATH	secretory_peroxidase
Fvb3	8360554	8362010	FvH4_3g13910.t1	PR9	PER7_ARATH	secretory_peroxidase
Fvb3	9451975	9454958	FvH4_3g15220.t1	PR9	PER48_ARATH	secretory_peroxidase
Fvb3	9459761	9462048	FvH4_3g15230.t1	PR9	PER48_ARATH	secretory_peroxidase
Fvb3	9486887	9488113	FvH4_3g15260.t1	PR9	PER48_ARATH	plant_peroxidase_like
Fvb3	13720231	13722886	FvH4_3g20670.t1	PR9	PER47_ARATH	secretory_peroxidase
Fvb3	18248401	18250404	FvH4_3g25270.t1	PR9	PER60_ARATH	secretory_peroxidase
Fvb3	19989352	19991681	FvH4_3g26850.t1	PR9	PER26_ARATH	secretory_peroxidase
Fvb3	33902595	33904461	FvH4_3g40081.t1	PR9	PER1_ARAHY	secretory_peroxidase
Fvb3	33922976	33927000	FvH4_3g40120.t1	PR9	RIP1_MEDTR	plant_peroxidase_like
Fvb3	33930892	33932749	FvH4_3g40140.t1	PR9	RIP1_MEDTR	secretory_peroxidase
Fvb3	33943830	33945430	FvH4_3g40150.t1	PR9	RIP1_MEDTR	secretory_peroxidase
Fvb3	33948274	33949933	FvH4_3g40160.t1	PR9	RIP1_MEDTR	secretory_peroxidase
Fvb3	33955825	33959528	FvH4_3g40180.t1	PR9	PER4_VITVI	secretory_peroxidase
Fvb3	36992521	36995192	FvH4_3g44351.t1	PR9	PERN_ARMRU	secretory_peroxidase
Fvb3	36996644	36998509	FvH4_3g44360.t1	PR9	PER15_IPOBA	secretory_peroxidase
Fvb4	6975676	6976939	FvH4_4g07570.t1	PR9	PER43_ARATH	secretory_peroxidase
Fvb4	7229566	7232277	FvH4_4g07750.t1	PR9	PER45_ARATH	secretory_peroxidase
Fvb4	17369926	17371657	FvH4_4g13860.t1	PR9	PERX_NICSY	secretory_peroxidase
Fvb4	20889809	20891645	FvH4_4g16970.t1	PR9	PER24_ARATH	secretory_peroxidase
Fvb4	21956574	21957919	FvH4_4g18000.t1	PR9	PER5_VITVI	secretory_peroxidase
Fvb4	23352201	23353698	FvH4_4g19850.t1	PR9	PER29_ARATH	secretory_peroxidase
Fvb4	23560562	23562452	FvH4_4g20220.t1	PR9	PER40_ARATH	secretory_peroxidase
Fvb4	27015918	27017723	FvH4_4g25120.t1	PR9	PER5_VITVI	secretory_peroxidase
Fvb4	27018619	27019995	FvH4_4g25140.t1	PR9	PER5_VITVI	secretory_peroxidase
Fvb4	27524613	27526336	FvH4_4g25890.t1	PR9	PER57_ARATH	secretory_peroxidase
Fvb4	29241911	29243320	FvH4_4g28690.t1	PR9	PER11_ARATH	secretory_peroxidase
Fvb4	33213011	33214170	FvH4_4g36130.t1	PR9	PERX_NICSY	secretory_peroxidase
Fvb5	9361340	9362365	FvH4_5g16450.t1	PR9	PER41_ARATH	secretory_peroxidase
Fvb5	12859354	12861130	FvH4_5g21320.t1	PR9	PER20_ARATH	secretory_peroxidase
Fvb5	13166782	13168052	FvH4_5g21780.t1	PR9	PERN1_TOBAC	PLN03030
Fvb5	13183236	13184861	FvH4_5g21800.t1	PR9	PER2_ARAHY	PLN03030
Fvb5	15276659	15278290	FvH4_5g24010.t1	PR9	PERN1_TOBAC	PLN03030
Fvb5	21407502	21409522	FvH4_5g30550.t1	PR9	PER43_ARATH	secretory_peroxidase
Fvb6	4926434	4927713	FvH4_6g08310.t1	PR9	PER5_VITVI	secretory_peroxidase
Fvb6	6090011	6092245	FvH4_6g10250.t1	PR9	PER1_ARAHY	secretory_peroxidase
Fvb6	9683453	9685399	FvH4_6g15580.t1	PR9	PER21_ARATH	secretory_peroxidase
Fvb6	17861458	17861856	FvH4_6g23750.t1	PR9	PERX_LUPPO	plant_peroxidase_like
Fvb6	21279550	21281443	FvH4_6g27610.t1	PR9	PER52_ARATH	secretory_peroxidase
Fvb6	24850381	24851666	FvH4_6g31750.t1	PR9	PER29_ARATH	plant_peroxidase_like
Fvb6	33639026	33640782	FvH4_6g43490.t1	PR9	PER27_ARATH	secretory_peroxidase
Fvb6	33644745	33646777	FvH4_6g43500.t1	PR9	PER3_ARATH	secretory_peroxidase
Fvb6	37374453	37376312	FvH4_6g50150.t1	PR9	PER63_ARATH	secretory_peroxidase
Fvb6	39284200	39285888	FvH4_6g53650.t1	PR9	PER55_ARATH	secretory_peroxidase
Fvb6	39317780	39319542	FvH4_6g53680.t1	PR9	PER55_ARATH	secretory_peroxidase
Fvb6	39320531	39322971	FvH4_6g53690.t1	PR9	PER55_ARATH	secretory_peroxidase
Fvb7	19468396	19469660	FvH4_7g25550.t1	PR9	PER4_VITVI	secretory_peroxidase
Fvb7	19498949	19500734	FvH4_7g25570.t1	PR9	PER4_VITVI	secretory_peroxidase
Fvb7	19501064	19502674	FvH4_7g25571.t1	PR9	PER52_ARATH	secretory_peroxidase
Fvb7	21281275	21282859	FvH4_7g28760.t1	PR9	PER66_ARATH	secretory_peroxidase
Fvb7	23604453	23606086	FvH4_7g33020.t1	PR9	PER5_VITVI	secretory_peroxidase
Fvb5	9359198	9360114	unannotated:Fvb5_9359198-9360114_6	PR9	PER41_ARATH	secretory_peroxidase
Fvb1	9264707	9265288	FvH4_1g16190.t1	PR6	ICID_SOLTU	potato_inhibit
Fvb4	2543814	2544224	FvH4_4g02840.t1	PR6	BGIA_MOMCH	potato_inhibit
Fvb4	2544931	2545500	FvH4_4g02850.t1	PR6	BGIA_MOMCH	potato_inhibit
Fvb4	2561233	2562001	FvH4_4g02860.t1	PR6	BGIA_MOMCH	potato_inhibit
Fvb4	2564294	2565116	FvH4_4g02870.t1	PR6	ITH5_CUCMA	potato_inhibit
Fvb4	2566792	2567655	FvH4_4g02880.t1	PR6	ITH5_CUCMA	potato_inhibit
Fvb4	2586242	2587580	FvH4_4g02940.t1	PR6	BGIA_MOMCH	potato_inhibit

## Sheet: A. thaliana TAIR10
gene	family	BLAST
AT1G01310.1|PACid:19649801	PR1	sp|Q40374|PR1_MEDTR
AT1G01900.1|PACid:19657151	PR7	sp|Q84WS0|SBT11_ARATH
AT1G01980.1|PACid:19655987	PR18	sp|Q9LPC3|BBE1_ARATH
AT1G02335.1|PACid:19655383	PR15/16	sp|Q9FZ27|GL22_ARATH
AT1G02360.1|PACid:19654334	PR3	sp|Q5NB11|CHI10_ORYSJ
AT1G04110.1|PACid:19652802	PR7	sp|O64495|SBT12_ARATH
AT1G05240.1|PACid:19657003	PR9	sp|Q67Z07|PER2_ARATH
AT1G05250.1|PACid:19649246	PR9	sp|Q67Z07|PER2_ARATH
AT1G05260.1|PACid:19649599	PR9	sp|O23044|PER3_ARATH
AT1G05850.1|PACid:19657005	PR3	sp|Q9MA41|CTL1_ARATH
AT1G09560.1|PACid:19650054	PR15/16	sp|P94014|GL21_ARATH
AT1G10460.1|PACid:19653657	PR15/16	sp|P92998|GL11_ARATH
AT1G11770.1|PACid:19652135	PR18	sp|Q9SA99|BBE2_ARATH
AT1G11820.2|PACid:19654102	PR2	sp|O65399|E131_ARATH
AT1G14540.1|PACid:19655290	PR9	sp|Q9LE15|PER4_ARATH
AT1G14550.1|PACid:19651856	PR9	sp|Q9M9Q9|PER5_ARATH
AT1G18250.2|PACid:19653361	PR5	sp|P50699|TLPH_ARATH
AT1G18970.1|PACid:19651300	PR15/16	sp|P92995|GLT1_ARATH
AT1G18980.1|PACid:19655202	PR15/16	sp|Q9LMC9|GLT2_ARATH
AT1G19320.1|PACid:19653955	PR5	sp|P28493|PR5_ARATH
AT1G19610.1|PACid:19656735	PR12	sp|P82787|DEF19_ARATH
AT1G20030.2|PACid:19655956	PR5	sp|Q9FF29|PR5K_ARATH
AT1G20150.1|PACid:19652640	PR7	sp|F4HSQ2|SBT51_ARATH
AT1G20160.1|PACid:19654367	PR7	sp|Q9LNU1|CRSP_ARATH
AT1G24110.1|PACid:19653230	PR9	sp|O48677|PER6_ARATH
AT1G26380.1|PACid:19649211	PR18	sp|Q9FZC4|FOX1_ARATH
AT1G26390.1|PACid:19651617	PR18	sp|Q9FZC5|FOX2_ARATH
AT1G26400.1|PACid:19649481	PR18	sp|Q9FZC6|FOX3_ARATH
AT1G26410.1|PACid:19656570	PR18	sp|Q9FZC7|FOX4_ARATH
AT1G26420.1|PACid:19656444	PR18	sp|Q9FZC8|FOX5_ARATH
AT1G30080.1|PACid:19654284	PR2	sp|Q8L868|E1311_ARATH
AT1G30600.1|PACid:19655374	PR7	sp|Q9SA75|SBT21_ARATH
AT1G30700.1|PACid:19655193	PR18	sp|Q9SA85|BBE8_ARATH
AT1G30710.1|PACid:19652997	PR18	sp|Q9SA86|BBE9_ARATH
AT1G30720.1|PACid:19653011	PR18	sp|Q9SA87|BBE10_ARATH
AT1G30730.1|PACid:19649953	PR18	sp|Q9SA88|BBE11_ARATH
AT1G30740.1|PACid:19651359	PR18	sp|Q9SA89|BBE12_ARATH
AT1G30760.1|PACid:19655389	PR18	sp|Q93ZA3|BBE13_ARATH
AT1G30870.1|PACid:19654292	PR9	sp|Q9SY33|PER7_ARATH
AT1G32860.1|PACid:19650728	PR2	sp|Q8L868|E1311_ARATH
AT1G32940.1|PACid:19654653	PR7	sp|Q9MAP7|SBT35_ARATH
AT1G32950.1|PACid:19649665	PR7	sp|F4HPF1|SBT34_ARATH
AT1G32960.1|PACid:19654437	PR7	sp|Q9MAP5|SBT33_ARATH
AT1G32970.1|PACid:19651042	PR7	sp|Q9MAP4|SBT32_ARATH
AT1G32980.1|PACid:19655310	PR7	sp|Q9MAP4|SBT32_ARATH
AT1G33220.1|PACid:19653538	PR2	sp|O49353|BG5_ARATH
AT1G34510.1|PACid:19656811	PR9	sp|Q9LNL0|PER8_ARATH
AT1G34575.1|PACid:19655681	PR18	sp|F4HV09|BBE14_ARATH
AT1G44970.1|PACid:19653505	PR9	sp|Q96512|PER9_ARATH
AT1G49570.1|PACid:19649458	PR9	sp|Q9FX85|PER10_ARATH
AT1G50050.1|PACid:19652196	PR1	sp|P09042|PR1C_TOBAC
AT1G50060.1|PACid:19657544	PR1	sp|P07053|PR1B_TOBAC
AT1G55010.1|PACid:19657372	PR12	sp|Q9FZ31|DEF18_ARATH
AT1G56680.1|PACid:19650819	PR3	sp|O24654|CHI60_ARATH
AT1G62340.1|PACid:19653101	PR7	sp|F4HYR6|SBT24_ARATH
AT1G64760.1|PACid:19653143	PR2	sp|Q6NKW9|E138_ARATH
AT1G66100.1|PACid:19655410	PR13	sp|Q9C8D6|THN24_ARATH
AT1G66210.1|PACid:19652804	PR7	sp|Q8GWX9|SBT3G_ARATH
AT1G66220.1|PACid:19651605	PR7	sp|Q9C7U8|SBT3H_ARATH
AT1G66250.1|PACid:19651814	PR2	sp|Q9C7U5|E132_ARATH
AT1G68850.1|PACid:19656726	PR9	sp|Q96519|PER11_ARATH
AT1G70250.1|PACid:19653900	PR5	sp|Q9FF29|PR5K_ARATH
AT1G71695.1|PACid:19649080	PR9	sp|Q96520|PER12_ARATH
AT1G72260.1|PACid:19655246	PR13	sp|Q42596|THN21_ARATH
AT1G72610.1|PACid:19654636	PR15/16	sp|P94040|GL31_ARATH
AT1G73620.1|PACid:19657149	PR5	sp|P50699|TLPH_ARATH
AT1G74820.1|PACid:19656574	PR15/16	sp|Q9S772|GLT3_ARATH
AT1G75030.1|PACid:19656030	PR5	sp|P28493|PR5_ARATH
AT1G75040.1|PACid:19651451	PR5	sp|P28493|PR5_ARATH
AT1G75050.1|PACid:19652466	PR5	sp|P28493|PR5_ARATH
AT1G75800.1|PACid:19652232	PR5	sp|Q9FF29|PR5K_ARATH
AT1G75830.1|PACid:19652821	PR12	sp|P30224|DEF13_ARATH
AT1G77100.1|PACid:19653648	PR9	sp|O49293|PER13_ARATH
AT1G77490.1|PACid:19654802	PR9	sp|Q42593|APXT_ARATH
AT1G77700.1|PACid:19650968	PR5	sp|Q5DWG1|CRJ35_CRYJA
AT1G77780.1|PACid:19654429	PR2	sp|Q02439|E13F_HORVU
AT1G77790.1|PACid:19655206	PR2	sp|Q9M2M0|BG1_ARATH
AT2G01630.1|PACid:19639924	PR2	sp|Q9ZU91|E133_ARATH
AT2G04160.1|PACid:19643203	PR7	sp|Q9ZSP5|AIR3_ARATH
AT2G05790.1|PACid:19639804	PR2	sp|Q9ZU91|E133_ARATH
AT2G05920.1|PACid:19639391	PR7	sp|Q9ZUF6|SBT18_ARATH
AT2G14580.1|PACid:19638797	PR1	sp|Q9ZNS4|PRB1_ARATH
AT2G14610.1|PACid:19641077	PR1	sp|P33154|PR1_ARATH
AT2G15010.1|PACid:19639999	PR13	sp|Q8VZK8|THN23_ARATH
AT2G15050.1|PACid:19643514	PR14	sp|Q9ZUK6|NLTP7_ARATH
AT2G15130.1|PACid:19641155	PR17	sp|C0HJG8|BSP_BOSSE
AT2G15170.1|PACid:19642740	PR17	sp|C0HJG8|BSP_BOSSE
AT2G15220.1|PACid:19643507	PR17	sp|C0HJG8|BSP_BOSSE
AT2G15325.1|PACid:19641967	PR14	sp|Q6AWW0|NLTP9_ARATH
AT2G16230.1|PACid:19640506	PR2	sp|Q9M069|E137_ARATH
AT2G17860.1|PACid:19638651	PR5	sp|A0A1P8B554|THLP1_ARATH
AT2G18140.1|PACid:19642380	PR9	sp|Q9SI17|PER14_ARATH
AT2G18150.1|PACid:19640062	PR9	sp|Q9SI16|PER15_ARATH
AT2G18370.1|PACid:19640990	PR14	sp|Q9ZPW9|NLTP8_ARATH
AT2G18980.1|PACid:19641980	PR9	sp|Q96518|PER16_ARATH
AT2G19170.1|PACid:19642267	PR7	sp|O64481|SBT25_ARATH
AT2G19440.1|PACid:19638176	PR2	sp|Q6NKW9|E138_ARATH
AT2G19970.1|PACid:19643512	PR1	sp|P33154|PR1_ARATH
AT2G19980.1|PACid:19640110	PR1	sp|P33154|PR1_ARATH
AT2G19990.1|PACid:19638316	PR1	sp|P11670|PRB1_TOBAC
AT2G22420.1|PACid:19642479	PR9	sp|Q9SJZ2|PER17_ARATH
AT2G24800.1|PACid:19639018	PR9	sp|Q9SK52|PER18_ARATH
AT2G24810.1|PACid:19639094	PR5	sp|Q5DWG1|CRJ35_CRYJA
AT2G26010.1|PACid:19641604	PR12	sp|O80995|DEF14_ARATH
AT2G26020.1|PACid:19640016	PR12	sp|O80994|DEF15_ARATH
AT2G26600.1|PACid:19641176	PR2	sp|Q8L868|E1311_ARATH
AT2G27500.1|PACid:19642500	PR2	sp|Q9ZQG9|E1314_ARATH
AT2G28790.1|PACid:19640901	PR5	sp|Q41350|OLP1_SOLLC
AT2G34060.1|PACid:19639325	PR9	sp|O22959|PER19_ARATH
AT2G34790.1|PACid:19638745	PR18	sp|O64743|BBE15_ARATH
AT2G34810.1|PACid:19643314	PR18	sp|O64745|BBE16_ARATH
AT2G35380.1|PACid:19643048	PR9	sp|Q9SLH7|PER20_ARATH
AT2G37130.1|PACid:19639207	PR9	sp|Q42580|PER21_ARATH
AT2G38380.1|PACid:19638191	PR9	sp|P24102|PER22_ARATH
AT2G38390.1|PACid:19638178	PR9	sp|O80912|PER23_ARATH
AT2G38530.1|PACid:19639169	PR14	sp|Q9S7I3|NLTP2_ARATH
AT2G38540.1|PACid:19643272	PR14	sp|Q42589|NLTP1_ARATH
AT2G38870.1|PACid:19640842	PR6	sp|Q6XNP7|HPI_HEVBR
AT2G38900.2|PACid:19643114	PR6	sp|Q6XNP7|HPI_HEVBR
AT2G39040.1|PACid:19642555	PR9	sp|Q9ZV04|PER24_ARATH
AT2G39640.1|PACid:19641390	PR2	sp|P52409|E13B_WHEAT
AT2G39850.1|PACid:19638446	PR7	sp|F4IG09|SBT41_ARATH
AT2G41480.1|PACid:19642476	PR9	sp|O80822|PER25_ARATH
AT2G43480.1|PACid:19643264	PR9	sp|O22862|PER26_ARATH
AT2G43570.1|PACid:19640053	PR3	sp|O24603|CHI_ARATH
AT2G43580.1|PACid:19639713	PR3	sp|O24598|CHI58_ARATH
AT2G43590.1|PACid:19643586	PR3	sp|O24658|CHI59_ARATH
AT2G43600.1|PACid:19638066	PR3	sp|O24654|CHI60_ARATH
AT2G43610.1|PACid:19638282	PR3	sp|O22842|CHI61_ARATH
AT2G43620.1|PACid:19638161	PR3	sp|O22841|CHI62_ARATH
AT3G01190.1|PACid:19662747	PR9	sp|Q43735|PER27_ARATH
AT3G03670.1|PACid:19660528	PR9	sp|Q9SS67|PER28_ARATH
AT3G04010.1|PACid:19659352	PR2	sp|Q6NKW9|E138_ARATH
AT3G04150.2|PACid:19663933	PR15/16	sp|Q9M8X1|GL12_ARATH
AT3G04170.1|PACid:19660436	PR15/16	sp|Q9M8X3|GL13_ARATH
AT3G04180.1|PACid:19663213	PR15/16	sp|Q9M8X4|GL14_ARATH
AT3G04190.1|PACid:19660536	PR15/16	sp|Q9M8X5|GL15_ARATH
AT3G04200.1|PACid:19660128	PR15/16	sp|Q9M8X6|GL16_ARATH
AT3G04720.1|PACid:19659991	PR4	sp|P43082|HEVL_ARATH
AT3G05930.1|PACid:19659424	PR15/16	sp|P93000|GL23_ARATH
AT3G05950.1|PACid:19661975	PR15/16	sp|Q9SFF9|GL17_ARATH
AT3G07320.1|PACid:19660921	PR2	sp|Q06915|EA6_ARATH
AT3G08770.2|PACid:19663510	PR14	sp|Q9LDB4|NLTP6_ARATH
AT3G09590.1|PACid:19662636	PR1	sp|Q05968|PR1_HORVU
AT3G09640.1|PACid:19660573	PR9	sp|Q1PER6|APX2_ARATH
AT3G10080.1|PACid:19659850	PR15/16	sp|Q9SR72|GL32_ARATH
AT3G12500.1|PACid:19660095	PR3	sp|P19171|CHIB_ARATH
AT3G13560.1|PACid:19661904	PR2	sp|Q94CD8|E134_ARATH
AT3G14067.1|PACid:19662608	PR7	sp|Q9LVJ1|SBT14_ARATH
AT3G14240.1|PACid:19659270	PR7	sp|Q9LUM3|SBT15_ARATH
AT3G15800.1|PACid:19661159	PR2	sp|Q9ZQG9|E1314_ARATH
AT3G16920.1|PACid:19659023	PR3	sp|Q9LSP9|CTL2_ARATH
AT3G17070.1|PACid:19660889	PR9	sp|Q9LSP0|PER29_ARATH
AT3G19690.1|PACid:19662092	PR1	sp|Q9ZNS4|PRB1_ARATH
AT3G21770.1|PACid:19660274	PR9	sp|Q9LSY7|PER30_ARATH
AT3G23770.1|PACid:19660002	PR2	sp|Q06915|EA6_ARATH
AT3G24330.1|PACid:19664954	PR2	sp|Q6NKW9|E138_ARATH
AT3G28200.1|PACid:19662577	PR9	sp|Q9LHA7|PER31_ARATH
AT3G32980.1|PACid:19659045	PR9	sp|Q9LHB9|PER32_ARATH
AT3G42570.1|PACid:19659304	PR9	sp|Q9LSP0|PER29_ARATH
AT3G46570.1|PACid:19659552	PR2	sp|P52409|E13B_WHEAT
AT3G46840.1|PACid:19659211	PR7	sp|F4JA91|SBT45_ARATH
AT3G46850.1|PACid:19663376	PR7	sp|Q9STF7|SBT46_ARATH
AT3G46860.1|PACid:19660125	PR6	sp|P82381|ICI_LINUS
AT3G47540.2|PACid:19664385	PR3	sp|O24658|CHI59_ARATH
AT3G49110.1|PACid:19664624	PR9	sp|P24101|PER33_ARATH
AT3G49120.1|PACid:19663363	PR9	sp|Q9SMU8|PER34_ARATH
AT3G49960.1|PACid:19664084	PR9	sp|Q96510|PER35_ARATH
AT3G50990.1|PACid:19663751	PR9	sp|Q9SD46|PER36_ARATH
AT3G51590.1|PACid:19662602	PR14	sp|Q9SCZ0|NLTPC_ARATH
AT3G51600.1|PACid:19661395	PR14	sp|Q9XFS7|NLTP5_ARATH
AT3G54420.1|PACid:19663758	PR3	sp|Q9M2U5|CHI5_ARATH
AT3G55430.1|PACid:19660567	PR2	sp|P52409|E13B_WHEAT
AT3G55780.1|PACid:19661573	PR2	sp|Q9C7U5|E132_ARATH
AT3G57240.1|PACid:19660395	PR2	sp|F4J270|BG3_ARATH
AT3G57260.1|PACid:19660269	PR2	sp|P33157|E13A_ARATH
AT3G57270.1|PACid:19660510	PR2	sp|Q9M2M0|BG1_ARATH
AT3G61810.1|PACid:19662030	PR2	sp|Q8VYE5|E1312_ARATH
AT3G62020.1|PACid:19664138	PR15/16	sp|Q9M263|GL24_ARATH
AT4G00230.1|PACid:19646359	PR7	sp|Q9LLL8|SBT4E_ARATH
AT4G01700.1|PACid:19644967	PR3	sp|Q5NB11|CHI10_ORYSJ
AT4G07820.1|PACid:19646139	PR1	sp|P33154|PR1_ARATH
AT4G08390.1|PACid:19644181	PR9	sp|Q42592|APXS_ARATH
AT4G08770.1|PACid:19644352	PR9	sp|Q9LDN9|PER37_ARATH
AT4G08780.1|PACid:19645617	PR9	sp|Q9LDA4|PER38_ARATH
AT4G10510.1|PACid:19648631	PR7	sp|Q9SZY2|SBT37_ARATH
AT4G10520.1|PACid:19644562	PR7	sp|Q9ZSB0|SBT39_ARATH
AT4G10530.1|PACid:19645666	PR7	sp|Q9ZSB1|SBT3A_ARATH
AT4G10540.1|PACid:19644097	PR7	sp|Q9SZY3|SBT38_ARATH
AT4G10550.3|PACid:19647456	PR7	sp|Q8L7I2|SBT36_ARATH
AT4G11290.1|PACid:19648416	PR9	sp|Q9SUT2|PER39_ARATH
AT4G11650.1|PACid:19647638	PR5	sp|P50700|OSL3_ARATH
AT4G14080.1|PACid:19645184	PR2	sp|Q06915|EA6_ARATH
AT4G14630.1|PACid:19646654	PR15/16	sp|Q9LEA7|GL18_ARATH
AT4G15040.1|PACid:19648605	PR7	sp|O23357|SBT42_ARATH
AT4G16260.1|PACid:19644698	PR2	sp|Q8VZJ2|BGNEM_ARATH
AT4G16270.1|PACid:19647397	PR9	sp|O23474|PER40_ARATH
AT4G17180.1|PACid:19647601	PR2	sp|Q9M088|E135_ARATH
AT4G17690.1|PACid:19648399	PR9	sp|O23609|PER41_ARATH
AT4G18250.1|PACid:19646810	PR5	sp|Q9FF29|PR5K_ARATH
AT4G18340.1|PACid:19645649	PR2	sp|Q9ZQG9|E1314_ARATH
AT4G19720.1|PACid:19643762	PR11	sp|O81862|CHIC_ARATH
AT4G19730.1|PACid:19647090	PR11	sp|O81862|CHIC_ARATH
AT4G19740.1|PACid:19649024	PR11	sp|O81862|CHIC_ARATH
AT4G19750.1|PACid:19645920	PR11	sp|O81862|CHIC_ARATH
AT4G19760.1|PACid:19646447	PR11	sp|O81862|CHIC_ARATH
AT4G19770.1|PACid:19647544	PR11	sp|O81862|CHIC_ARATH
AT4G19800.1|PACid:19644910	PR11	sp|O81862|CHIC_ARATH
AT4G19810.1|PACid:19644419	PR11	sp|O81862|CHIC_ARATH
AT4G19820.1|PACid:19644962	PR11	sp|O81862|CHIC_ARATH
AT4G20430.1|PACid:19644258	PR7	sp|Q9SUN6|SBT22_ARATH
AT4G20800.1|PACid:19646089	PR18	sp|Q9SVG7|BBE17_ARATH
AT4G20820.1|PACid:19647020	PR18	sp|Q9SVG5|BBE18_ARATH
AT4G20830.1|PACid:19647134	PR18	sp|Q9SVG4|RETOL_ARATH
AT4G20840.1|PACid:19647334	PR18	sp|Q9SVG3|BBE21_ARATH
AT4G20860.1|PACid:19644890	PR18	sp|Q9SUC6|BBE22_ARATH
AT4G21323.1|PACid:19645852	PR7	sp|F4JJH4|SBT31_ARATH
AT4G21326.1|PACid:19648632	PR7	sp|F4JJH5|SBT3C_ARATH
AT4G21630.1|PACid:19643763	PR7	sp|Q9SVT4|SBT3E_ARATH
AT4G21640.1|PACid:19645957	PR7	sp|F4JJL8|SBT3F_ARATH
AT4G21650.1|PACid:19646287	PR7	sp|Q8GUK4|SBT3D_ARATH
AT4G21960.1|PACid:19648011	PR9	sp|Q9SB81|PER42_ARATH
AT4G24180.1|PACid:19647916	PR5	sp|A0A1P8B554|THLP1_ARATH
AT4G25780.1|PACid:19645352	PR1	sp|Q40374|PR1_MEDTR
AT4G25790.1|PACid:19646498	PR1	sp|Q40374|PR1_MEDTR
AT4G25980.1|PACid:19643742	PR9	sp|Q9SZH2|PER43_ARATH
AT4G26010.1|PACid:19645428	PR9	sp|Q93V93|PER44_ARATH
AT4G26330.1|PACid:19646660	PR7	sp|Q9STQ2|SBT3I_ARATH
AT4G26830.1|PACid:19648670	PR2	sp|Q9FJU9|E1313_ARATH
AT4G29360.1|PACid:19647015	PR2	sp|Q8VYE5|E1312_ARATH
AT4G30020.1|PACid:19643981	PR7	sp|Q9SZV5|SBT26_ARATH
AT4G30170.1|PACid:19647742	PR9	sp|Q96522|PER45_ARATH
AT4G30320.1|PACid:19647644	PR1	sp|Q40374|PR1_MEDTR
AT4G31140.1|PACid:19649013	PR2	sp|Q9M088|E135_ARATH
AT4G31470.1|PACid:19645295	PR1	sp|Q40374|PR1_MEDTR
AT4G31760.1|PACid:19644045	PR9	sp|O81772|PER46_ARATH
AT4G32320.1|PACid:19644159	PR9	sp|Q8GY91|APX6_ARATH
AT4G33355.1|PACid:19643862	PR14	sp|Q2V3C1|NLTPB_ARATH
AT4G33420.1|PACid:19645536	PR9	sp|Q9SZB9|PER47_ARATH
AT4G33710.1|PACid:19645038	PR1	sp|Q9ZNS4|PRB1_ARATH
AT4G33720.1|PACid:19646926	PR1	sp|Q9ZNS4|PRB1_ARATH
AT4G33730.1|PACid:19646543	PR1	sp|P33154|PR1_ARATH
AT4G33870.1|PACid:19644608	PR9	sp|O81755|PER48_ARATH
AT4G34480.1|PACid:19647225	PR2	sp|Q9M069|E137_ARATH
AT4G34980.1|PACid:19643738	PR7	sp|O49607|SBT16_ARATH
AT4G35000.1|PACid:19648154	PR9	sp|Q42564|APX3_ARATH
AT4G35970.1|PACid:19648112	PR9	sp|Q7XZP5|APX5_ARATH
AT4G36000.1|PACid:19644623	PR5	sp|A0A1P8B554|THLP1_ARATH
AT4G36010.1|PACid:19645288	PR5	sp|A0A1P8B554|THLP1_ARATH
AT4G36430.1|PACid:19648806	PR9	sp|O23237|PER49_ARATH
AT4G37520.1|PACid:19647714	PR9	sp|Q43731|PER50_ARATH
AT4G37530.1|PACid:19646731	PR9	sp|Q9SZE7|PER51_ARATH
AT4G38660.1|PACid:19648522	PR5	sp|A0A1P8B554|THLP1_ARATH
AT4G38670.1|PACid:19646184	PR5	sp|A0A1P8B554|THLP1_ARATH
AT5G01870.1|PACid:19669323	PR14	sp|Q9LZV9|NLTPA_ARATH
AT5G02140.1|PACid:19669164	PR5	sp|Q53MB8|TLPH_ORYSJ
AT5G02730.1|PACid:19672163	PR1	sp|Q05968|PR1_HORVU
AT5G03620.1|PACid:19668481	PR7	sp|Q9LZS6|SBT4F_ARATH
AT5G05340.1|PACid:19665519	PR9	sp|Q9FLC0|PER52_ARATH
AT5G06720.1|PACid:19669507	PR9	sp|Q42578|PER53_ARATH
AT5G06730.1|PACid:19668053	PR9	sp|Q9FG34|PER54_ARATH
AT5G11940.1|PACid:19668001	PR7	sp|Q1PDX5|SBT3B_ARATH
AT5G14130.1|PACid:19671780	PR9	sp|Q96509|PER55_ARATH
AT5G15180.1|PACid:19669260	PR9	sp|Q9LXG3|PER56_ARATH
AT5G17820.1|PACid:19666464	PR9	sp|Q43729|PER57_ARATH
AT5G18220.1|PACid:19669371	PR2	sp|Q6NKW9|E138_ARATH
AT5G19880.1|PACid:19668060	PR9	sp|P59120|PER58_ARATH
AT5G19890.1|PACid:19667549	PR9	sp|Q39034|PER59_ARATH
AT5G20330.1|PACid:19668848	PR2	sp|O49352|BG4_ARATH
AT5G20340.1|PACid:19668703	PR2	sp|O49353|BG5_ARATH
AT5G20390.1|PACid:19666585	PR2	sp|O49353|BG5_ARATH
AT5G20560.1|PACid:19665401	PR2	sp|O49353|BG5_ARATH
AT5G20630.1|PACid:19671045	PR15/16	sp|P94072|GL33_ARATH
AT5G20870.1|PACid:19672738	PR2	sp|Q9M088|E135_ARATH
AT5G22410.1|PACid:19666652	PR9	sp|Q9FMR0|PER60_ARATH
AT5G24070.1|PACid:19671237	PR9	sp|Q9FLV5|PER61_ARATH
AT5G24090.1|PACid:19671349	PR8	sp|P19172|CHIA_ARATH
AT5G24318.1|PACid:19665691	PR2	sp|P52409|E13B_WHEAT
AT5G24620.1|PACid:19671477	PR5	sp|A0A1P8B554|THLP1_ARATH
AT5G26130.1|PACid:19669231	PR1	sp|Q9ZNS4|PRB1_ARATH
AT5G26700.1|PACid:19671333	PR15/16	sp|O65252|GL25_ARATH
AT5G36910.1|PACid:19665927	PR13	sp|Q42597|THN22_ARATH
AT5G38280.1|PACid:19671001	PR5	sp|Q9FF29|PR5K_ARATH
AT5G38910.1|PACid:19671406	PR15/16	sp|Q9FMB0|GL19_ARATH
AT5G38930.1|PACid:19669364	PR15/16	sp|Q9FMA9|GL110_ARATH
AT5G38940.1|PACid:19672205	PR15/16	sp|Q9FMA8|GL111_ARATH
AT5G38950.1|PACid:19665295	PR15/16	sp|Q9FMA8|GL111_ARATH
AT5G38960.1|PACid:19665839	PR15/16	sp|Q9FMA6|GL112_ARATH
AT5G39100.1|PACid:19673329	PR15/16	sp|P92997|GL113_ARATH
AT5G39110.1|PACid:19671449	PR15/16	sp|Q9FID0|GL114_ARATH
AT5G39120.1|PACid:19671348	PR15/16	sp|Q9FIC9|GL115_ARATH
AT5G39130.1|PACid:19667668	PR15/16	sp|Q9FIC8|GL116_ARATH
AT5G39150.1|PACid:19668373	PR15/16	sp|Q9FIC6|GL117_ARATH
AT5G39160.1|PACid:19668693	PR15/16	sp|P92999|GL118_ARATH
AT5G39180.1|PACid:19669591	PR15/16	sp|Q9FL89|GL119_ARATH
AT5G39190.1|PACid:19672438	PR15/16	sp|P92996|GL120_ARATH
AT5G39580.1|PACid:19670482	PR9	sp|Q9FKA4|PER62_ARATH
AT5G40020.1|PACid:19666341	PR5	sp|P50699|TLPH_ARATH
AT5G40150.1|PACid:19668224	PR9	sp|Q9FL16|PER63_ARATH
AT5G42100.1|PACid:19672708	PR2	sp|Q9FHX5|E1310_ARATH
AT5G42180.1|PACid:19666549	PR9	sp|Q43872|PER64_ARATH
AT5G42720.1|PACid:19670678	PR2	sp|Q9M069|E137_ARATH
AT5G43570.1|PACid:19671887	PR6	sp|P82381|ICI_LINUS
AT5G43580.1|PACid:19671081	PR6	sp|P19873|ITH5_CUCMA
AT5G44360.1|PACid:19666812	PR18	sp|Q9FKV2|BBE23_ARATH
AT5G44380.1|PACid:19666053	PR18	sp|Q9FKV0|BBE24_ARATH
AT5G44390.1|PACid:19671236	PR18	sp|Q9FKU9|BBE25_ARATH
AT5G44400.1|PACid:19669545	PR18	sp|Q9FKU8|BBE26_ARATH
AT5G44410.1|PACid:19671653	PR18	sp|Q9FI25|BBE27_ARATH
AT5G44420.1|PACid:19672878	PR12	sp|Q9FI23|DEF16_ARATH
AT5G44430.1|PACid:19670272	PR12	sp|Q9FI22|DEF17_ARATH
AT5G44440.1|PACid:19669634	PR18	sp|Q9FI21|BBE28_ARATH
AT5G44530.1|PACid:19671424	PR7	sp|Q9FI12|SBT23_ARATH
AT5G45640.1|PACid:19672985	PR7	sp|F4KEL0|SBT55_ARATH
AT5G45650.1|PACid:19669839	PR7	sp|Q9FK76|SBT56_ARATH
AT5G47000.1|PACid:19666858	PR9	sp|Q9FJR1|PER65_ARATH
AT5G51750.1|PACid:19672394	PR7	sp|Q9FLI4|SBT13_ARATH
AT5G51890.1|PACid:19668136	PR9	sp|Q9LT91|PER66_ARATH
AT5G55180.2|PACid:19671679	PR2	sp|Q9FJU9|E1313_ARATH
AT5G56590.1|PACid:19672997	PR2	sp|Q9FJU9|E1313_ARATH
AT5G57625.1|PACid:19665367	PR1	sp|Q40374|PR1_MEDTR
AT5G58090.1|PACid:19673028	PR2	sp|Q93Z08|E136_ARATH
AT5G58390.1|PACid:19666534	PR9	sp|Q9LVL2|PER67_ARATH
AT5G58400.1|PACid:19665579	PR9	sp|Q9LVL1|PER68_ARATH
AT5G58480.1|PACid:19669573	PR2	sp|Q9FGH4|E139_ARATH
AT5G58820.1|PACid:19671637	PR7	sp|F4KGD4|SBT47_ARATH
AT5G58830.1|PACid:19672303	PR7	sp|Q9FIM6|SBT48_ARATH
AT5G58840.1|PACid:19672078	PR7	sp|Q9FIM5|SBT49_ARATH
AT5G59090.1|PACid:19668109	PR7	sp|Q8L7D2|SBT4C_ARATH
AT5G59100.1|PACid:19666968	PR7	sp|Q9FGU3|SBT44_ARATH
AT5G59110.1|PACid:19670112	PR7	sp|Q8L7D2|SBT4C_ARATH
AT5G59120.1|PACid:19665845	PR7	sp|Q9FIG2|SBT4D_ARATH
AT5G59130.1|PACid:19670314	PR7	sp|Q9FIG1|SBT4B_ARATH
AT5G59190.1|PACid:19667115	PR7	sp|Q9FIF8|SBT43_ARATH
AT5G59310.1|PACid:19665782	PR14	sp|Q9LLR6|NLTP4_ARATH
AT5G59320.1|PACid:19670217	PR14	sp|Q9LLR7|NLTP3_ARATH
AT5G59330.1|PACid:19669057	PR14	sp|Q9LLR6|NLTP4_ARATH
AT5G59810.1|PACid:19667591	PR7	sp|F4JXC5|SBT54_ARATH
AT5G61750.1|PACid:19671894	PR15/16	sp|Q9FLT3|GL34_ARATH
AT5G64100.1|PACid:19673191	PR9	sp|Q96511|PER69_ARATH
AT5G64110.1|PACid:19670763	PR9	sp|Q9FMI7|PER70_ARATH
AT5G64120.1|PACid:19671858	PR9	sp|Q43387|PER71_ARATH
AT5G64790.1|PACid:19666710	PR2	sp|Q6NKW9|E138_ARATH
AT5G66390.1|PACid:19667215	PR9	sp|Q9FJZ9|PER72_ARATH
AT5G66590.1|PACid:19666597	PR1	sp|Q41495|ST14_SOLTU
AT5G67090.1|PACid:19671115	PR7	sp|Q9FHA4|SBT19_ARATH
AT5G67360.1|PACid:19665370	PR7	sp|O65351|SBT17_ARATH
AT5G67400.1|PACid:19672175	PR9	sp|Q43873|PER73_ARATH
