# Supplementary material for: Pathogenesis-related proteins are evolutionarily conserved across diploid and octoploid Fragaria species
Source: Research Square preprint supplement (doi:10.21203/rs.3.rs-7264946/v1), 2025-08-27
Supplement: Supplementary file 5 [file 997ebcaa817b3ded62c742d9.xlsx]

## Sheet: PR1
Protein	Run	Length	Prediction	Identifier	Description	Start	End	E-value	Date	InterPro ID	Description
Fxa2Ag100251.1	b1e9ceae7a57e4961d201c260c1b83b2	172	Phobius	NON_CYTOPLASMIC_DOMAIN	Region of a membrane-bound protein predicted to be outside the membrane, in the extracellular region.	27	172	-	2024-09-09	-	-
Fxa2Ag100251.1	b1e9ceae7a57e4961d201c260c1b83b2	172	Pfam	PF00188	Cysteine-rich secretory protein family	44	160	4.8e-18	2024-09-09	IPR014044	CAP domain
Fxa2Ag100251.1	b1e9ceae7a57e4961d201c260c1b83b2	172	Phobius	SIGNAL_PEPTIDE_N_REGION	N-terminal region of a signal peptide.	1	6	-	2024-09-09	-	-
Fxa2Ag100251.1	b1e9ceae7a57e4961d201c260c1b83b2	172	Phobius	SIGNAL_PEPTIDE_C_REGION	C-terminal region of a signal peptide.	19	26	-	2024-09-09	-	-
Fxa2Ag100251.1	b1e9ceae7a57e4961d201c260c1b83b2	172	Phobius	SIGNAL_PEPTIDE	Signal peptide region	1	26	-	2024-09-09	-	-
Fxa2Ag100251.1	b1e9ceae7a57e4961d201c260c1b83b2	172	Phobius	SIGNAL_PEPTIDE_H_REGION	Hydrophobic region of a signal peptide.	7	18	-	2024-09-09	-	-
Fxa2Dg200160.1	caad1c5584a29e1474b0f8e72441925c	138	Pfam	PF00188	Cysteine-rich secretory protein family	10	126	2.2e-16	2024-09-09	IPR014044	CAP domain
Fxa2Dg200165.1	84ec4b452e595a63cda55e49f7419760	245	MobiDBLite	mobidb-lite	consensus disorder prediction	26	92	-	2024-09-09	-	-
Fxa2Dg200165.1	84ec4b452e595a63cda55e49f7419760	245	Pfam	PF00188	Cysteine-rich secretory protein family	88	204	2.1e-16	2024-09-09	IPR014044	CAP domain
Fxa2Dg200165.1	84ec4b452e595a63cda55e49f7419760	245	Phobius	SIGNAL_PEPTIDE_H_REGION	Hydrophobic region of a signal peptide.	6	17	-	2024-09-09	-	-
Fxa2Dg200165.1	84ec4b452e595a63cda55e49f7419760	245	Phobius	SIGNAL_PEPTIDE_C_REGION	C-terminal region of a signal peptide.	18	26	-	2024-09-09	-	-
Fxa2Dg200165.1	84ec4b452e595a63cda55e49f7419760	245	MobiDBLite	mobidb-lite	consensus disorder prediction	53	81	-	2024-09-09	-	-
Fxa2Dg200165.1	84ec4b452e595a63cda55e49f7419760	245	Phobius	NON_CYTOPLASMIC_DOMAIN	Region of a membrane-bound protein predicted to be outside the membrane, in the extracellular region.	27	245	-	2024-09-09	-	-
Fxa2Dg200165.1	84ec4b452e595a63cda55e49f7419760	245	Phobius	SIGNAL_PEPTIDE	Signal peptide region	1	26	-	2024-09-09	-	-
Fxa2Dg200165.1	84ec4b452e595a63cda55e49f7419760	245	Phobius	SIGNAL_PEPTIDE_N_REGION	N-terminal region of a signal peptide.	1	5	-	2024-09-09	-	-
CAA31008_PR1_N.tabacum	08012292510610e377331be379947a5e	165	Phobius	NON_CYTOPLASMIC_DOMAIN	Region of a membrane-bound protein predicted to be outside the membrane, in the extracellular region.	28	165	-	2024-09-09	-	-
CAA31008_PR1_N.tabacum	08012292510610e377331be379947a5e	165	Phobius	SIGNAL_PEPTIDE_C_REGION	C-terminal region of a signal peptide.	21	27	-	2024-09-09	-	-
CAA31008_PR1_N.tabacum	08012292510610e377331be379947a5e	165	Pfam	PF00188	Cysteine-rich secretory protein family	35	153	3.7e-20	2024-09-09	IPR014044	CAP domain
CAA31008_PR1_N.tabacum	08012292510610e377331be379947a5e	165	Phobius	SIGNAL_PEPTIDE_N_REGION	N-terminal region of a signal peptide.	1	8	-	2024-09-09	-	-
CAA31008_PR1_N.tabacum	08012292510610e377331be379947a5e	165	Phobius	SIGNAL_PEPTIDE_H_REGION	Hydrophobic region of a signal peptide.	9	20	-	2024-09-09	-	-
CAA31008_PR1_N.tabacum	08012292510610e377331be379947a5e	165	Phobius	SIGNAL_PEPTIDE	Signal peptide region	1	27	-	2024-09-09	-	-
Fxa2Ag100252.1	8f9d0f92e2a5927f86682eff8ae94f74	165	Phobius	SIGNAL_PEPTIDE	Signal peptide region	1	28	-	2024-09-09	-	-
Fxa2Ag100252.1	8f9d0f92e2a5927f86682eff8ae94f74	165	Phobius	SIGNAL_PEPTIDE_C_REGION	C-terminal region of a signal peptide.	21	28	-	2024-09-09	-	-
Fxa2Ag100252.1	8f9d0f92e2a5927f86682eff8ae94f74	165	Pfam	PF00188	Cysteine-rich secretory protein family	36	154	2.3e-20	2024-09-09	IPR014044	CAP domain
Fxa2Ag100252.1	8f9d0f92e2a5927f86682eff8ae94f74	165	Phobius	SIGNAL_PEPTIDE_N_REGION	N-terminal region of a signal peptide.	1	8	-	2024-09-09	-	-
Fxa2Ag100252.1	8f9d0f92e2a5927f86682eff8ae94f74	165	Phobius	NON_CYTOPLASMIC_DOMAIN	Region of a membrane-bound protein predicted to be outside the membrane, in the extracellular region.	29	165	-	2024-09-09	-	-
Fxa2Ag100252.1	8f9d0f92e2a5927f86682eff8ae94f74	165	Phobius	SIGNAL_PEPTIDE_H_REGION	Hydrophobic region of a signal peptide.	9	20	-	2024-09-09	-	-
Fxa3Dg200907.1	dfc237be649d2f10d9a927ee9fc5f69a	217	Phobius	TRANSMEMBRANE	Region of a membrane-bound protein predicted to be embedded in the membrane.	6	26	-	2024-09-09	-	-
Fxa3Dg200907.1	dfc237be649d2f10d9a927ee9fc5f69a	217	Pfam	PF00188	Cysteine-rich secretory protein family	89	205	2.1e-16	2024-09-09	IPR014044	CAP domain
Fxa3Dg200907.1	dfc237be649d2f10d9a927ee9fc5f69a	217	Phobius	CYTOPLASMIC_DOMAIN	Region of a membrane-bound protein predicted to be outside the membrane, in the cytoplasm.	27	217	-	2024-09-09	-	-
Fxa3Dg200907.1	dfc237be649d2f10d9a927ee9fc5f69a	217	Phobius	NON_CYTOPLASMIC_DOMAIN	Region of a membrane-bound protein predicted to be outside the membrane, in the extracellular region.	1	5	-	2024-09-09	-	-
Fxa2Bg200149.1	c6af391f0f0fc1c6943099a3d2a3b584	196	Pfam	PF00188	Cysteine-rich secretory protein family	68	184	5.2e-14	2024-09-09	IPR014044	CAP domain
Fxa4Bg100818.1	805982c236e35880e7279fba74aa7582	156	Phobius	SIGNAL_PEPTIDE_C_REGION	C-terminal region of a signal peptide.	15	19	-	2024-09-09	-	-
Fxa4Bg100818.1	805982c236e35880e7279fba74aa7582	156	Phobius	SIGNAL_PEPTIDE_H_REGION	Hydrophobic region of a signal peptide.	3	14	-	2024-09-09	-	-
Fxa4Bg100818.1	805982c236e35880e7279fba74aa7582	156	Phobius	NON_CYTOPLASMIC_DOMAIN	Region of a membrane-bound protein predicted to be outside the membrane, in the extracellular region.	20	156	-	2024-09-09	-	-
Fxa4Bg100818.1	805982c236e35880e7279fba74aa7582	156	Phobius	SIGNAL_PEPTIDE	Signal peptide region	1	19	-	2024-09-09	-	-
Fxa4Bg100818.1	805982c236e35880e7279fba74aa7582	156	Phobius	SIGNAL_PEPTIDE_N_REGION	N-terminal region of a signal peptide.	1	2	-	2024-09-09	-	-
Fxa4Bg100830.1	805982c236e35880e7279fba74aa7582	156	Phobius	SIGNAL_PEPTIDE_C_REGION	C-terminal region of a signal peptide.	15	19	-	2024-09-09	-	-
Fxa4Bg100830.1	805982c236e35880e7279fba74aa7582	156	Phobius	SIGNAL_PEPTIDE_H_REGION	Hydrophobic region of a signal peptide.	3	14	-	2024-09-09	-	-
Fxa4Bg100830.1	805982c236e35880e7279fba74aa7582	156	Phobius	NON_CYTOPLASMIC_DOMAIN	Region of a membrane-bound protein predicted to be outside the membrane, in the extracellular region.	20	156	-	2024-09-09	-	-
Fxa4Bg100830.1	805982c236e35880e7279fba74aa7582	156	Phobius	SIGNAL_PEPTIDE	Signal peptide region	1	19	-	2024-09-09	-	-
Fxa4Bg100830.1	805982c236e35880e7279fba74aa7582	156	Phobius	SIGNAL_PEPTIDE_N_REGION	N-terminal region of a signal peptide.	1	2	-	2024-09-09	-	-
Fxa4Bg100822.1	805982c236e35880e7279fba74aa7582	156	Phobius	SIGNAL_PEPTIDE_C_REGION	C-terminal region of a signal peptide.	15	19	-	2024-09-09	-	-
Fxa4Bg100822.1	805982c236e35880e7279fba74aa7582	156	Phobius	SIGNAL_PEPTIDE_H_REGION	Hydrophobic region of a signal peptide.	3	14	-	2024-09-09	-	-
Fxa4Bg100822.1	805982c236e35880e7279fba74aa7582	156	Phobius	NON_CYTOPLASMIC_DOMAIN	Region of a membrane-bound protein predicted to be outside the membrane, in the extracellular region.	20	156	-	2024-09-09	-	-
Fxa4Bg100822.1	805982c236e35880e7279fba74aa7582	156	Phobius	SIGNAL_PEPTIDE	Signal peptide region	1	19	-	2024-09-09	-	-
Fxa4Bg100822.1	805982c236e35880e7279fba74aa7582	156	Phobius	SIGNAL_PEPTIDE_N_REGION	N-terminal region of a signal peptide.	1	2	-	2024-09-09	-	-
Fxa4Bg100826.1	805982c236e35880e7279fba74aa7582	156	Phobius	SIGNAL_PEPTIDE_C_REGION	C-terminal region of a signal peptide.	15	19	-	2024-09-09	-	-
Fxa4Bg100826.1	805982c236e35880e7279fba74aa7582	156	Phobius	SIGNAL_PEPTIDE_H_REGION	Hydrophobic region of a signal peptide.	3	14	-	2024-09-09	-	-
Fxa4Bg100826.1	805982c236e35880e7279fba74aa7582	156	Phobius	NON_CYTOPLASMIC_DOMAIN	Region of a membrane-bound protein predicted to be outside the membrane, in the extracellular region.	20	156	-	2024-09-09	-	-
Fxa4Bg100826.1	805982c236e35880e7279fba74aa7582	156	Phobius	SIGNAL_PEPTIDE	Signal peptide region	1	19	-	2024-09-09	-	-
Fxa4Bg100826.1	805982c236e35880e7279fba74aa7582	156	Phobius	SIGNAL_PEPTIDE_N_REGION	N-terminal region of a signal peptide.	1	2	-	2024-09-09	-	-
Fxa2Cg201381.1	824b644640b5e20b255e4a46e56b231b	121	MobiDBLite	mobidb-lite	consensus disorder prediction	1	32	-	2024-09-09	-	-
Fxa2Cg201381.1	824b644640b5e20b255e4a46e56b231b	121	Pfam	PF00188	Cysteine-rich secretory protein family	29	121	2.4e-07	2024-09-09	IPR014044	CAP domain
Fxa2Cg201381.1	824b644640b5e20b255e4a46e56b231b	121	MobiDBLite	mobidb-lite	consensus disorder prediction	10	26	-	2024-09-09	-	-
Fxa4Dg100662.1	5437d9372af1148b46c3f12ed592b2db	189	Phobius	NON_CYTOPLASMIC_DOMAIN	Region of a membrane-bound protein predicted to be outside the membrane, in the extracellular region.	20	189	-	2024-09-09	-	-
Fxa4Dg100662.1	5437d9372af1148b46c3f12ed592b2db	189	Pfam	PF00188	Cysteine-rich secretory protein family	57	177	1.9e-15	2024-09-09	IPR014044	CAP domain
Fxa4Dg100662.1	5437d9372af1148b46c3f12ed592b2db	189	Phobius	SIGNAL_PEPTIDE_C_REGION	C-terminal region of a signal peptide.	15	19	-	2024-09-09	-	-
Fxa4Dg100662.1	5437d9372af1148b46c3f12ed592b2db	189	Phobius	SIGNAL_PEPTIDE_H_REGION	Hydrophobic region of a signal peptide.	3	14	-	2024-09-09	-	-
Fxa4Dg100662.1	5437d9372af1148b46c3f12ed592b2db	189	Phobius	SIGNAL_PEPTIDE	Signal peptide region	1	19	-	2024-09-09	-	-
Fxa4Dg100662.1	5437d9372af1148b46c3f12ed592b2db	189	Phobius	SIGNAL_PEPTIDE_N_REGION	N-terminal region of a signal peptide.	1	2	-	2024-09-09	-	-
Fxa3Ag100935.1	f573fbe6a4159233ca88dfa4d51dfb75	158	Phobius	SIGNAL_PEPTIDE	Signal peptide region	1	25	-	2024-09-09	-	-
Fxa3Ag100935.1	f573fbe6a4159233ca88dfa4d51dfb75	158	Phobius	NON_CYTOPLASMIC_DOMAIN	Region of a membrane-bound protein predicted to be outside the membrane, in the extracellular region.	26	158	-	2024-09-09	-	-
Fxa3Ag100935.1	f573fbe6a4159233ca88dfa4d51dfb75	158	Phobius	SIGNAL_PEPTIDE_C_REGION	C-terminal region of a signal peptide.	21	25	-	2024-09-09	-	-
Fxa3Ag100935.1	f573fbe6a4159233ca88dfa4d51dfb75	158	Phobius	SIGNAL_PEPTIDE_N_REGION	N-terminal region of a signal peptide.	1	8	-	2024-09-09	-	-
Fxa3Ag100935.1	f573fbe6a4159233ca88dfa4d51dfb75	158	Phobius	SIGNAL_PEPTIDE_H_REGION	Hydrophobic region of a signal peptide.	9	20	-	2024-09-09	-	-
Fxa3Ag100935.1	f573fbe6a4159233ca88dfa4d51dfb75	158	Pfam	PF00188	Cysteine-rich secretory protein family	33	148	4e-16	2024-09-09	IPR014044	CAP domain
Fxa4Dg100661.1	f2bffcedec126e6ef590c42a9b35cb65	171	Phobius	SIGNAL_PEPTIDE	Signal peptide region	1	23	-	2024-09-09	-	-
Fxa4Dg100661.1	f2bffcedec126e6ef590c42a9b35cb65	171	Phobius	SIGNAL_PEPTIDE_C_REGION	C-terminal region of a signal peptide.	16	23	-	2024-09-09	-	-
Fxa4Dg100661.1	f2bffcedec126e6ef590c42a9b35cb65	171	Pfam	PF00188	Cysteine-rich secretory protein family	43	159	5.4e-17	2024-09-09	IPR014044	CAP domain
Fxa4Dg100661.1	f2bffcedec126e6ef590c42a9b35cb65	171	Phobius	SIGNAL_PEPTIDE_H_REGION	Hydrophobic region of a signal peptide.	4	15	-	2024-09-09	-	-
Fxa4Dg100661.1	f2bffcedec126e6ef590c42a9b35cb65	171	Phobius	SIGNAL_PEPTIDE_N_REGION	N-terminal region of a signal peptide.	1	3	-	2024-09-09	-	-
Fxa4Dg100661.1	f2bffcedec126e6ef590c42a9b35cb65	171	Phobius	NON_CYTOPLASMIC_DOMAIN	Region of a membrane-bound protein predicted to be outside the membrane, in the extracellular region.	24	171	-	2024-09-09	-	-
Fxa1Ag101329.1	11f9db0cb721717b7aa90518916eeb76	541	Phobius	SIGNAL_PEPTIDE_N_REGION	N-terminal region of a signal peptide.	1	7	-	2024-09-09	-	-
Fxa1Ag101329.1	11f9db0cb721717b7aa90518916eeb76	541	Phobius	NON_CYTOPLASMIC_DOMAIN	Region of a membrane-bound protein predicted to be outside the membrane, in the extracellular region.	27	541	-	2024-09-09	-	-
Fxa1Ag101329.1	11f9db0cb721717b7aa90518916eeb76	541	Phobius	SIGNAL_PEPTIDE_C_REGION	C-terminal region of a signal peptide.	22	26	-	2024-09-09	-	-
Fxa1Ag101329.1	11f9db0cb721717b7aa90518916eeb76	541	Phobius	SIGNAL_PEPTIDE	Signal peptide region	1	26	-	2024-09-09	-	-
Fxa1Ag101329.1	11f9db0cb721717b7aa90518916eeb76	541	Pfam	PF00188	Cysteine-rich secretory protein family	407	528	7.9e-13	2024-09-09	IPR014044	CAP domain
Fxa1Ag101329.1	11f9db0cb721717b7aa90518916eeb76	541	Pfam	PF00188	Cysteine-rich secretory protein family	205	326	1.6e-11	2024-09-09	IPR014044	CAP domain
Fxa1Ag101329.1	11f9db0cb721717b7aa90518916eeb76	541	Pfam	PF00188	Cysteine-rich secretory protein family	42	160	1e-08	2024-09-09	IPR014044	CAP domain
Fxa1Ag101329.1	11f9db0cb721717b7aa90518916eeb76	541	Phobius	SIGNAL_PEPTIDE_H_REGION	Hydrophobic region of a signal peptide.	8	21	-	2024-09-09	-	-
Fxa3Cg100829.1	e1071b79527734674a5086f8d9c6ac17	150	Phobius	SIGNAL_PEPTIDE	Signal peptide region	1	25	-	2024-09-09	-	-
Fxa3Cg100829.1	e1071b79527734674a5086f8d9c6ac17	150	Phobius	NON_CYTOPLASMIC_DOMAIN	Region of a membrane-bound protein predicted to be outside the membrane, in the extracellular region.	26	150	-	2024-09-09	-	-
Fxa3Cg100829.1	e1071b79527734674a5086f8d9c6ac17	150	Phobius	SIGNAL_PEPTIDE_C_REGION	C-terminal region of a signal peptide.	21	25	-	2024-09-09	-	-
Fxa3Cg100829.1	e1071b79527734674a5086f8d9c6ac17	150	Phobius	SIGNAL_PEPTIDE_N_REGION	N-terminal region of a signal peptide.	1	8	-	2024-09-09	-	-
Fxa3Cg100829.1	e1071b79527734674a5086f8d9c6ac17	150	Phobius	SIGNAL_PEPTIDE_H_REGION	Hydrophobic region of a signal peptide.	9	20	-	2024-09-09	-	-
Fxa3Cg100829.1	e1071b79527734674a5086f8d9c6ac17	150	Pfam	PF00188	Cysteine-rich secretory protein family	33	140	3.9e-08	2024-09-09	IPR014044	CAP domain
Fxa2Ag100671.1	4577e55f5a2e5fd2cd027bc1861de9a3	92	Pfam	PF00188	Cysteine-rich secretory protein family	16	80	5.2e-09	2024-09-09	IPR014044	CAP domain
Fxa2Ag100257.1	9f5ad1661924e3e169402a4194b73444	317	Phobius	SIGNAL_PEPTIDE	Signal peptide region	1	25	-	2024-09-09	-	-
Fxa2Ag100257.1	9f5ad1661924e3e169402a4194b73444	317	Phobius	SIGNAL_PEPTIDE_C_REGION	C-terminal region of a signal peptide.	21	25	-	2024-09-09	-	-
Fxa2Ag100257.1	9f5ad1661924e3e169402a4194b73444	317	Pfam	PF00188	Cysteine-rich secretory protein family	33	149	4.2e-12	2024-09-09	IPR014044	CAP domain
Fxa2Ag100257.1	9f5ad1661924e3e169402a4194b73444	317	Pfam	PF00188	Cysteine-rich secretory protein family	184	263	0.00072	2024-09-09	IPR014044	CAP domain
Fxa2Ag100257.1	9f5ad1661924e3e169402a4194b73444	317	Phobius	SIGNAL_PEPTIDE_N_REGION	N-terminal region of a signal peptide.	1	8	-	2024-09-09	-	-
Fxa2Ag100257.1	9f5ad1661924e3e169402a4194b73444	317	Phobius	SIGNAL_PEPTIDE_H_REGION	Hydrophobic region of a signal peptide.	9	20	-	2024-09-09	-	-
Fxa2Ag100257.1	9f5ad1661924e3e169402a4194b73444	317	Phobius	NON_CYTOPLASMIC_DOMAIN	Region of a membrane-bound protein predicted to be outside the membrane, in the extracellular region.	26	317	-	2024-09-09	-	-
Fxa3Ag101086.1	bfccfc9b08fc4eecc4535973c7b44c64	135	Pfam	PF00188	Cysteine-rich secretory protein family	8	123	5.6e-18	2024-09-09	IPR014044	CAP domain
Fxa3Dg200778.1	d7826b07d9535e1cb8249fb0417b4c64	89	Phobius	SIGNAL_PEPTIDE	Signal peptide region	1	25	-	2024-09-09	-	-
Fxa3Dg200778.1	d7826b07d9535e1cb8249fb0417b4c64	89	Pfam	PF00188	Cysteine-rich secretory protein family	33	85	2.4e-05	2024-09-09	IPR014044	CAP domain
Fxa3Dg200778.1	d7826b07d9535e1cb8249fb0417b4c64	89	Phobius	NON_CYTOPLASMIC_DOMAIN	Region of a membrane-bound protein predicted to be outside the membrane, in the extracellular region.	26	89	-	2024-09-09	-	-
Fxa3Dg200778.1	d7826b07d9535e1cb8249fb0417b4c64	89	Phobius	SIGNAL_PEPTIDE_C_REGION	C-terminal region of a signal peptide.	21	25	-	2024-09-09	-	-
Fxa3Dg200778.1	d7826b07d9535e1cb8249fb0417b4c64	89	Phobius	SIGNAL_PEPTIDE_N_REGION	N-terminal region of a signal peptide.	1	8	-	2024-09-09	-	-
Fxa3Dg200778.1	d7826b07d9535e1cb8249fb0417b4c64	89	Phobius	SIGNAL_PEPTIDE_H_REGION	Hydrophobic region of a signal peptide.	9	20	-	2024-09-09	-	-
Fxa2Bg200181.1	6da46f7595619aba2edd09174f53a2c0	206	Pfam	PF00188	Cysteine-rich secretory protein family	57	137	8.9e-05	2024-09-09	IPR014044	CAP domain
Fxa2Bg200181.1	6da46f7595619aba2edd09174f53a2c0	206	Phobius	SIGNAL_PEPTIDE	Signal peptide region	1	39	-	2024-09-09	-	-
Fxa2Bg200181.1	6da46f7595619aba2edd09174f53a2c0	206	Phobius	SIGNAL_PEPTIDE_N_REGION	N-terminal region of a signal peptide.	1	19	-	2024-09-09	-	-
Fxa2Bg200181.1	6da46f7595619aba2edd09174f53a2c0	206	Phobius	SIGNAL_PEPTIDE_C_REGION	C-terminal region of a signal peptide.	32	39	-	2024-09-09	-	-
Fxa2Bg200181.1	6da46f7595619aba2edd09174f53a2c0	206	Phobius	SIGNAL_PEPTIDE_H_REGION	Hydrophobic region of a signal peptide.	20	31	-	2024-09-09	-	-
Fxa2Bg200181.1	6da46f7595619aba2edd09174f53a2c0	206	Phobius	NON_CYTOPLASMIC_DOMAIN	Region of a membrane-bound protein predicted to be outside the membrane, in the extracellular region.	40	206	-	2024-09-09	-	-
Fxa4Ag100903.1	d83f6d98686dde13355ba895ff053037	189	Phobius	NON_CYTOPLASMIC_DOMAIN	Region of a membrane-bound protein predicted to be outside the membrane, in the extracellular region.	20	189	-	2024-09-09	-	-
Fxa4Ag100903.1	d83f6d98686dde13355ba895ff053037	189	Phobius	SIGNAL_PEPTIDE_C_REGION	C-terminal region of a signal peptide.	15	19	-	2024-09-09	-	-
Fxa4Ag100903.1	d83f6d98686dde13355ba895ff053037	189	Phobius	SIGNAL_PEPTIDE_H_REGION	Hydrophobic region of a signal peptide.	3	14	-	2024-09-09	-	-
Fxa4Ag100903.1	d83f6d98686dde13355ba895ff053037	189	Pfam	PF00188	Cysteine-rich secretory protein family	57	177	2e-15	2024-09-09	IPR014044	CAP domain
Fxa4Ag100903.1	d83f6d98686dde13355ba895ff053037	189	Phobius	SIGNAL_PEPTIDE	Signal peptide region	1	19	-	2024-09-09	-	-
Fxa4Ag100903.1	d83f6d98686dde13355ba895ff053037	189	Phobius	SIGNAL_PEPTIDE_N_REGION	N-terminal region of a signal peptide.	1	2	-	2024-09-09	-	-
Fxa4Ag100904.1	7e238d294b59a1849cef1171174e7d34	171	Phobius	SIGNAL_PEPTIDE	Signal peptide region	1	23	-	2024-09-09	-	-
Fxa4Ag100904.1	7e238d294b59a1849cef1171174e7d34	171	Phobius	SIGNAL_PEPTIDE_C_REGION	C-terminal region of a signal peptide.	16	23	-	2024-09-09	-	-
Fxa4Ag100904.1	7e238d294b59a1849cef1171174e7d34	171	Pfam	PF00188	Cysteine-rich secretory protein family	43	159	2.1e-16	2024-09-09	IPR014044	CAP domain
Fxa4Ag100904.1	7e238d294b59a1849cef1171174e7d34	171	Phobius	SIGNAL_PEPTIDE_H_REGION	Hydrophobic region of a signal peptide.	4	15	-	2024-09-09	-	-
Fxa4Ag100904.1	7e238d294b59a1849cef1171174e7d34	171	Phobius	SIGNAL_PEPTIDE_N_REGION	N-terminal region of a signal peptide.	1	3	-	2024-09-09	-	-
Fxa4Ag100904.1	7e238d294b59a1849cef1171174e7d34	171	Phobius	NON_CYTOPLASMIC_DOMAIN	Region of a membrane-bound protein predicted to be outside the membrane, in the extracellular region.	24	171	-	2024-09-09	-	-
Fxa2Cg201390.1	2423a016dbd2f11a06b0d0d157904a6e	159	Phobius	SIGNAL_PEPTIDE	Signal peptide region	1	20	-	2024-09-09	-	-
Fxa2Cg201390.1	2423a016dbd2f11a06b0d0d157904a6e	159	Pfam	PF00188	Cysteine-rich secretory protein family	32	147	1.8e-16	2024-09-09	IPR014044	CAP domain
Fxa2Cg201390.1	2423a016dbd2f11a06b0d0d157904a6e	159	Phobius	NON_CYTOPLASMIC_DOMAIN	Region of a membrane-bound protein predicted to be outside the membrane, in the extracellular region.	21	159	-	2024-09-09	-	-
Fxa2Cg201390.1	2423a016dbd2f11a06b0d0d157904a6e	159	Phobius	SIGNAL_PEPTIDE_H_REGION	Hydrophobic region of a signal peptide.	4	15	-	2024-09-09	-	-
Fxa2Cg201390.1	2423a016dbd2f11a06b0d0d157904a6e	159	Phobius	SIGNAL_PEPTIDE_N_REGION	N-terminal region of a signal peptide.	1	3	-	2024-09-09	-	-
Fxa2Cg201390.1	2423a016dbd2f11a06b0d0d157904a6e	159	Phobius	SIGNAL_PEPTIDE_C_REGION	C-terminal region of a signal peptide.	16	20	-	2024-09-09	-	-
Fxa2Bg201535.1	b7d8769ba467d82d2449487c9c128bb4	297	Phobius	SIGNAL_PEPTIDE_H_REGION	Hydrophobic region of a signal peptide.	22	32	-	2024-09-09	-	-
Fxa2Bg201535.1	b7d8769ba467d82d2449487c9c128bb4	297	Pfam	PF00188	Cysteine-rich secretory protein family	169	285	2.1e-18	2024-09-09	IPR014044	CAP domain
Fxa2Bg201535.1	b7d8769ba467d82d2449487c9c128bb4	297	Phobius	SIGNAL_PEPTIDE	Signal peptide region	1	39	-	2024-09-09	-	-
Fxa2Bg201535.1	b7d8769ba467d82d2449487c9c128bb4	297	Phobius	SIGNAL_PEPTIDE_C_REGION	C-terminal region of a signal peptide.	33	39	-	2024-09-09	-	-
Fxa2Bg201535.1	b7d8769ba467d82d2449487c9c128bb4	297	Phobius	NON_CYTOPLASMIC_DOMAIN	Region of a membrane-bound protein predicted to be outside the membrane, in the extracellular region.	40	297	-	2024-09-09	-	-
Fxa2Bg201535.1	b7d8769ba467d82d2449487c9c128bb4	297	MobiDBLite	mobidb-lite	consensus disorder prediction	39	66	-	2024-09-09	-	-
Fxa2Bg201535.1	b7d8769ba467d82d2449487c9c128bb4	297	MobiDBLite	mobidb-lite	consensus disorder prediction	39	104	-	2024-09-09	-	-
Fxa2Bg201535.1	b7d8769ba467d82d2449487c9c128bb4	297	MobiDBLite	mobidb-lite	consensus disorder prediction	75	104	-	2024-09-09	-	-
Fxa2Bg201535.1	b7d8769ba467d82d2449487c9c128bb4	297	Phobius	SIGNAL_PEPTIDE_N_REGION	N-terminal region of a signal peptide.	1	21	-	2024-09-09	-	-
Fxa1Bg201230.1	62c31378bce0b4fb4b422982b0aadc9d	172	Phobius	SIGNAL_PEPTIDE_N_REGION	N-terminal region of a signal peptide.	1	7	-	2024-09-09	-	-
Fxa1Bg201230.1	62c31378bce0b4fb4b422982b0aadc9d	172	Phobius	SIGNAL_PEPTIDE_C_REGION	C-terminal region of a signal peptide.	21	32	-	2024-09-09	-	-
Fxa1Bg201230.1	62c31378bce0b4fb4b422982b0aadc9d	172	Phobius	SIGNAL_PEPTIDE_H_REGION	Hydrophobic region of a signal peptide.	8	20	-	2024-09-09	-	-
Fxa1Bg201230.1	62c31378bce0b4fb4b422982b0aadc9d	172	Phobius	SIGNAL_PEPTIDE	Signal peptide region	1	32	-	2024-09-09	-	-
Fxa1Bg201230.1	62c31378bce0b4fb4b422982b0aadc9d	172	Pfam	PF00188	Cysteine-rich secretory protein family	38	158	2.8e-13	2024-09-09	IPR014044	CAP domain
Fxa1Bg201230.1	62c31378bce0b4fb4b422982b0aadc9d	172	Phobius	NON_CYTOPLASMIC_DOMAIN	Region of a membrane-bound protein predicted to be outside the membrane, in the extracellular region.	33	172	-	2024-09-09	-	-
Fxa2Ag100256.1	936ab0317bb64042749da5ed7d084123	417	Phobius	SIGNAL_PEPTIDE_N_REGION	N-terminal region of a signal peptide.	1	7	-	2024-09-09	-	-
Fxa2Ag100256.1	936ab0317bb64042749da5ed7d084123	417	Phobius	CYTOPLASMIC_DOMAIN	Region of a membrane-bound protein predicted to be outside the membrane, in the cytoplasm.	175	417	-	2024-09-09	-	-
Fxa2Ag100256.1	936ab0317bb64042749da5ed7d084123	417	Phobius	SIGNAL_PEPTIDE	Signal peptide region	1	24	-	2024-09-09	-	-
Fxa2Ag100256.1	936ab0317bb64042749da5ed7d084123	417	Phobius	SIGNAL_PEPTIDE_H_REGION	Hydrophobic region of a signal peptide.	8	19	-	2024-09-09	-	-
Fxa2Ag100256.1	936ab0317bb64042749da5ed7d084123	417	Pfam	PF00188	Cysteine-rich secretory protein family	288	405	3.1e-14	2024-09-09	IPR014044	CAP domain
Fxa2Ag100256.1	936ab0317bb64042749da5ed7d084123	417	Pfam	PF00188	Cysteine-rich secretory protein family	187	218	0.012	2024-09-09	IPR014044	CAP domain
Fxa2Ag100256.1	936ab0317bb64042749da5ed7d084123	417	Pfam	PF00188	Cysteine-rich secretory protein family	221	270	0.0054	2024-09-09	IPR014044	CAP domain
Fxa2Ag100256.1	936ab0317bb64042749da5ed7d084123	417	Pfam	PF00188	Cysteine-rich secretory protein family	32	148	8.6e-19	2024-09-09	IPR014044	CAP domain
Fxa2Ag100256.1	936ab0317bb64042749da5ed7d084123	417	Phobius	SIGNAL_PEPTIDE_C_REGION	C-terminal region of a signal peptide.	20	24	-	2024-09-09	-	-
Fxa2Ag100256.1	936ab0317bb64042749da5ed7d084123	417	Phobius	NON_CYTOPLASMIC_DOMAIN	Region of a membrane-bound protein predicted to be outside the membrane, in the extracellular region.	25	153	-	2024-09-09	-	-
Fxa2Ag100256.1	936ab0317bb64042749da5ed7d084123	417	Phobius	TRANSMEMBRANE	Region of a membrane-bound protein predicted to be embedded in the membrane.	154	174	-	2024-09-09	-	-
Fxa2Dg201486.1	5d331890ee17b5f58f433e5c41ed2247	273	MobiDBLite	mobidb-lite	consensus disorder prediction	26	69	-	2024-09-09	-	-
Fxa2Dg201486.1	5d331890ee17b5f58f433e5c41ed2247	273	Phobius	SIGNAL_PEPTIDE_N_REGION	N-terminal region of a signal peptide.	1	6	-	2024-09-09	-	-
Fxa2Dg201486.1	5d331890ee17b5f58f433e5c41ed2247	273	Pfam	PF00188	Cysteine-rich secretory protein family	145	261	1.7e-18	2024-09-09	IPR014044	CAP domain
Fxa2Dg201486.1	5d331890ee17b5f58f433e5c41ed2247	273	Phobius	NON_CYTOPLASMIC_DOMAIN	Region of a membrane-bound protein predicted to be outside the membrane, in the extracellular region.	25	273	-	2024-09-09	-	-
Fxa2Dg201486.1	5d331890ee17b5f58f433e5c41ed2247	273	Phobius	SIGNAL_PEPTIDE	Signal peptide region	1	24	-	2024-09-09	-	-
Fxa2Dg201486.1	5d331890ee17b5f58f433e5c41ed2247	273	Phobius	SIGNAL_PEPTIDE_C_REGION	C-terminal region of a signal peptide.	18	24	-	2024-09-09	-	-
Fxa2Dg201486.1	5d331890ee17b5f58f433e5c41ed2247	273	Phobius	SIGNAL_PEPTIDE_H_REGION	Hydrophobic region of a signal peptide.	7	17	-	2024-09-09	-	-
Fxa2Dg200228.1	7cd0eff50f6bf60e8ddfd3068f270c78	165	Phobius	SIGNAL_PEPTIDE	Signal peptide region	1	28	-	2024-09-09	-	-
Fxa2Dg200228.1	7cd0eff50f6bf60e8ddfd3068f270c78	165	Phobius	SIGNAL_PEPTIDE_C_REGION	C-terminal region of a signal peptide.	21	28	-	2024-09-09	-	-
Fxa2Dg200228.1	7cd0eff50f6bf60e8ddfd3068f270c78	165	Phobius	SIGNAL_PEPTIDE_N_REGION	N-terminal region of a signal peptide.	1	8	-	2024-09-09	-	-
Fxa2Dg200228.1	7cd0eff50f6bf60e8ddfd3068f270c78	165	Phobius	NON_CYTOPLASMIC_DOMAIN	Region of a membrane-bound protein predicted to be outside the membrane, in the extracellular region.	29	165	-	2024-09-09	-	-
Fxa2Dg200228.1	7cd0eff50f6bf60e8ddfd3068f270c78	165	Phobius	SIGNAL_PEPTIDE_H_REGION	Hydrophobic region of a signal peptide.	9	20	-	2024-09-09	-	-
Fxa2Dg200228.1	7cd0eff50f6bf60e8ddfd3068f270c78	165	Pfam	PF00188	Cysteine-rich secretory protein family	36	154	2.6e-20	2024-09-09	IPR014044	CAP domain
Fxa2Ag100258.1	8efd8e6761cdd52051d43f0d8a37e6f4	130	Pfam	PF00188	Cysteine-rich secretory protein family	6	118	3.3e-08	2024-09-09	IPR014044	CAP domain
Fxa1Cg101298.1	92edcb59581661f1d3e29187dfe06fad	157	Phobius	SIGNAL_PEPTIDE	Signal peptide region	1	17	-	2024-09-09	-	-
Fxa1Cg101298.1	92edcb59581661f1d3e29187dfe06fad	157	Phobius	SIGNAL_PEPTIDE_C_REGION	C-terminal region of a signal peptide.	12	17	-	2024-09-09	-	-
Fxa1Cg101298.1	92edcb59581661f1d3e29187dfe06fad	157	Phobius	NON_CYTOPLASMIC_DOMAIN	Region of a membrane-bound protein predicted to be outside the membrane, in the extracellular region.	18	157	-	2024-09-09	-	-
Fxa1Cg101298.1	92edcb59581661f1d3e29187dfe06fad	157	Pfam	PF00188	Cysteine-rich secretory protein family	23	144	1e-11	2024-09-09	IPR014044	CAP domain
Fxa1Cg101298.1	92edcb59581661f1d3e29187dfe06fad	157	Phobius	SIGNAL_PEPTIDE_N_REGION	N-terminal region of a signal peptide.	1	2	-	2024-09-09	-	-
Fxa1Cg101298.1	92edcb59581661f1d3e29187dfe06fad	157	Phobius	SIGNAL_PEPTIDE_H_REGION	Hydrophobic region of a signal peptide.	3	11	-	2024-09-09	-	-
Fxa2Bg200185.1	602a371ea750a1601530986d7a93ae4d	98	Phobius	SIGNAL_PEPTIDE_N_REGION	N-terminal region of a signal peptide.	1	7	-	2024-09-09	-	-
Fxa2Bg200185.1	602a371ea750a1601530986d7a93ae4d	98	Phobius	NON_CYTOPLASMIC_DOMAIN	Region of a membrane-bound protein predicted to be outside the membrane, in the extracellular region.	25	98	-	2024-09-09	-	-
Fxa2Bg200185.1	602a371ea750a1601530986d7a93ae4d	98	Phobius	SIGNAL_PEPTIDE_C_REGION	C-terminal region of a signal peptide.	20	24	-	2024-09-09	-	-
Fxa2Bg200185.1	602a371ea750a1601530986d7a93ae4d	98	Phobius	SIGNAL_PEPTIDE_H_REGION	Hydrophobic region of a signal peptide.	8	19	-	2024-09-09	-	-
Fxa2Bg200185.1	602a371ea750a1601530986d7a93ae4d	98	Phobius	SIGNAL_PEPTIDE	Signal peptide region	1	24	-	2024-09-09	-	-
Fxa2Ag100194.1	7950d0922ec891a18b647bc2867915e8	119	Phobius	TRANSMEMBRANE	Region of a membrane-bound protein predicted to be embedded in the membrane.	20	40	-	2024-09-09	-	-
Fxa2Ag100194.1	7950d0922ec891a18b647bc2867915e8	119	Phobius	CYTOPLASMIC_DOMAIN	Region of a membrane-bound protein predicted to be outside the membrane, in the cytoplasm.	1	19	-	2024-09-09	-	-
Fxa2Ag100194.1	7950d0922ec891a18b647bc2867915e8	119	Pfam	PF00188	Cysteine-rich secretory protein family	53	110	0.13	2024-09-09	IPR014044	CAP domain
Fxa2Ag100194.1	7950d0922ec891a18b647bc2867915e8	119	Phobius	NON_CYTOPLASMIC_DOMAIN	Region of a membrane-bound protein predicted to be outside the membrane, in the extracellular region.	41	119	-	2024-09-09	-	-
Fxa2Bg200179.1	e5dbbd1ce5a067e5d8a023c7516d4b37	91	Pfam	PF00188	Cysteine-rich secretory protein family	12	79	3.6e-09	2024-09-09	IPR014044	CAP domain
Fxa2Dg200227.1	f7c6a0868af7ad46ecf56a5b921ba1e6	139	Pfam	PF00188	Cysteine-rich secretory protein family	24	67	0.15	2024-09-09	IPR014044	CAP domain
Fxa3Bg200973.1	bfeaa3ebc768d3f4cefd223d8205c94c	215	Phobius	TRANSMEMBRANE	Region of a membrane-bound protein predicted to be embedded in the membrane.	6	26	-	2024-09-09	-	-
Fxa3Bg200973.1	bfeaa3ebc768d3f4cefd223d8205c94c	215	MobiDBLite	mobidb-lite	consensus disorder prediction	52	72	-	2024-09-09	-	-
Fxa3Bg200973.1	bfeaa3ebc768d3f4cefd223d8205c94c	215	Pfam	PF00188	Cysteine-rich secretory protein family	88	203	6.9e-16	2024-09-09	IPR014044	CAP domain
Fxa3Bg200973.1	bfeaa3ebc768d3f4cefd223d8205c94c	215	Phobius	CYTOPLASMIC_DOMAIN	Region of a membrane-bound protein predicted to be outside the membrane, in the cytoplasm.	27	215	-	2024-09-09	-	-
Fxa3Bg200973.1	bfeaa3ebc768d3f4cefd223d8205c94c	215	MobiDBLite	mobidb-lite	consensus disorder prediction	45	72	-	2024-09-09	-	-
Fxa3Bg200973.1	bfeaa3ebc768d3f4cefd223d8205c94c	215	Phobius	NON_CYTOPLASMIC_DOMAIN	Region of a membrane-bound protein predicted to be outside the membrane, in the extracellular region.	1	5	-	2024-09-09	-	-
Fxa2Cg201453.1	db6ed61f9a428c459f5c98d2676256be	657	Phobius	TRANSMEMBRANE	Region of a membrane-bound protein predicted to be embedded in the membrane.	48	66	-	2024-09-09	-	-
Fxa2Cg201453.1	db6ed61f9a428c459f5c98d2676256be	657	Phobius	NON_CYTOPLASMIC_DOMAIN	Region of a membrane-bound protein predicted to be outside the membrane, in the extracellular region.	67	503	-	2024-09-09	-	-
Fxa2Cg201453.1	db6ed61f9a428c459f5c98d2676256be	657	Pfam	PF00188	Cysteine-rich secretory protein family	75	186	7.4e-17	2024-09-09	IPR014044	CAP domain
Fxa2Cg201453.1	db6ed61f9a428c459f5c98d2676256be	657	Pfam	PF00188	Cysteine-rich secretory protein family	382	498	3.5e-13	2024-09-09	IPR014044	CAP domain
Fxa2Cg201453.1	db6ed61f9a428c459f5c98d2676256be	657	Pfam	PF00188	Cysteine-rich secretory protein family	537	644	2.5e-13	2024-09-09	IPR014044	CAP domain
Fxa2Cg201453.1	db6ed61f9a428c459f5c98d2676256be	657	Phobius	CYTOPLASMIC_DOMAIN	Region of a membrane-bound protein predicted to be outside the membrane, in the cytoplasm.	1	47	-	2024-09-09	-	-
Fxa2Cg201453.1	db6ed61f9a428c459f5c98d2676256be	657	Phobius	TRANSMEMBRANE	Region of a membrane-bound protein predicted to be embedded in the membrane.	504	524	-	2024-09-09	-	-
Fxa2Cg201453.1	db6ed61f9a428c459f5c98d2676256be	657	Phobius	CYTOPLASMIC_DOMAIN	Region of a membrane-bound protein predicted to be outside the membrane, in the cytoplasm.	525	657	-	2024-09-09	-	-
Fxa4Bg100831.1	6593a604bedd56ccbce914768c48429a	171	Phobius	SIGNAL_PEPTIDE	Signal peptide region	1	23	-	2024-09-09	-	-
Fxa4Bg100831.1	6593a604bedd56ccbce914768c48429a	171	Phobius	SIGNAL_PEPTIDE_C_REGION	C-terminal region of a signal peptide.	16	23	-	2024-09-09	-	-
Fxa4Bg100831.1	6593a604bedd56ccbce914768c48429a	171	Phobius	SIGNAL_PEPTIDE_N_REGION	N-terminal region of a signal peptide.	1	3	-	2024-09-09	-	-
Fxa4Bg100831.1	6593a604bedd56ccbce914768c48429a	171	Phobius	SIGNAL_PEPTIDE_H_REGION	Hydrophobic region of a signal peptide.	4	15	-	2024-09-09	-	-
Fxa4Bg100831.1	6593a604bedd56ccbce914768c48429a	171	Phobius	NON_CYTOPLASMIC_DOMAIN	Region of a membrane-bound protein predicted to be outside the membrane, in the extracellular region.	24	171	-	2024-09-09	-	-
Fxa4Bg100831.1	6593a604bedd56ccbce914768c48429a	171	Pfam	PF00188	Cysteine-rich secretory protein family	43	159	2.2e-17	2024-09-09	IPR014044	CAP domain
Fxa2Bg200180.1	0696e61c70c9c0021495cf9c1831ab68	165	Phobius	SIGNAL_PEPTIDE	Signal peptide region	1	28	-	2024-09-09	-	-
Fxa2Bg200180.1	0696e61c70c9c0021495cf9c1831ab68	165	Phobius	SIGNAL_PEPTIDE_C_REGION	C-terminal region of a signal peptide.	21	28	-	2024-09-09	-	-
Fxa2Bg200180.1	0696e61c70c9c0021495cf9c1831ab68	165	Phobius	NON_CYTOPLASMIC_DOMAIN	Region of a membrane-bound protein predicted to be outside the membrane, in the extracellular region.	29	165	-	2024-09-09	-	-
Fxa2Bg200180.1	0696e61c70c9c0021495cf9c1831ab68	165	Phobius	SIGNAL_PEPTIDE_N_REGION	N-terminal region of a signal peptide.	1	8	-	2024-09-09	-	-
Fxa2Bg200180.1	0696e61c70c9c0021495cf9c1831ab68	165	Phobius	SIGNAL_PEPTIDE_H_REGION	Hydrophobic region of a signal peptide.	9	20	-	2024-09-09	-	-
Fxa2Bg200180.1	0696e61c70c9c0021495cf9c1831ab68	165	Pfam	PF00188	Cysteine-rich secretory protein family	36	154	2.2e-20	2024-09-09	IPR014044	CAP domain
Fxa2Bg200182.1	0696e61c70c9c0021495cf9c1831ab68	165	Phobius	SIGNAL_PEPTIDE	Signal peptide region	1	28	-	2024-09-09	-	-
Fxa2Bg200182.1	0696e61c70c9c0021495cf9c1831ab68	165	Phobius	SIGNAL_PEPTIDE_C_REGION	C-terminal region of a signal peptide.	21	28	-	2024-09-09	-	-
Fxa2Bg200182.1	0696e61c70c9c0021495cf9c1831ab68	165	Phobius	NON_CYTOPLASMIC_DOMAIN	Region of a membrane-bound protein predicted to be outside the membrane, in the extracellular region.	29	165	-	2024-09-09	-	-
Fxa2Bg200182.1	0696e61c70c9c0021495cf9c1831ab68	165	Phobius	SIGNAL_PEPTIDE_N_REGION	N-terminal region of a signal peptide.	1	8	-	2024-09-09	-	-
Fxa2Bg200182.1	0696e61c70c9c0021495cf9c1831ab68	165	Phobius	SIGNAL_PEPTIDE_H_REGION	Hydrophobic region of a signal peptide.	9	20	-	2024-09-09	-	-
Fxa2Bg200182.1	0696e61c70c9c0021495cf9c1831ab68	165	Pfam	PF00188	Cysteine-rich secretory protein family	36	154	2.2e-20	2024-09-09	IPR014044	CAP domain
Fxa1Dg201184.1	70be174a70d80b0ff4294759871ac4ca	139	Pfam	PF00188	Cysteine-rich secretory protein family	5	125	1.5e-13	2024-09-09	IPR014044	CAP domain
Fxa2Bg200574.1	a135e5640aa66b5cd3e05967b8c72184	164	Phobius	NON_CYTOPLASMIC_DOMAIN	Region of a membrane-bound protein predicted to be outside the membrane, in the extracellular region.	27	164	-	2024-09-09	-	-
Fxa2Bg200574.1	a135e5640aa66b5cd3e05967b8c72184	164	Phobius	SIGNAL_PEPTIDE_C_REGION	C-terminal region of a signal peptide.	18	26	-	2024-09-09	-	-
Fxa2Bg200574.1	a135e5640aa66b5cd3e05967b8c72184	164	Pfam	PF00188	Cysteine-rich secretory protein family	35	152	1.3e-18	2024-09-09	IPR014044	CAP domain
Fxa2Bg200574.1	a135e5640aa66b5cd3e05967b8c72184	164	Phobius	SIGNAL_PEPTIDE	Signal peptide region	1	26	-	2024-09-09	-	-
Fxa2Bg200574.1	a135e5640aa66b5cd3e05967b8c72184	164	Phobius	SIGNAL_PEPTIDE_H_REGION	Hydrophobic region of a signal peptide.	6	17	-	2024-09-09	-	-
Fxa2Bg200574.1	a135e5640aa66b5cd3e05967b8c72184	164	Phobius	SIGNAL_PEPTIDE_N_REGION	N-terminal region of a signal peptide.	1	5	-	2024-09-09	-	-
Fxa1Cg101299.1	f3eade4efe2b24c415c31d3d11fc9eab	196	Pfam	PF00188	Cysteine-rich secretory protein family	17	137	2.5e-11	2024-09-09	IPR014044	CAP domain
Fxa1Cg101299.1	f3eade4efe2b24c415c31d3d11fc9eab	196	Pfam	PF00188	Cysteine-rich secretory protein family	147	184	0.00054	2024-09-09	IPR014044	CAP domain
Fxa2Dg200222.1	5dc06ad04742036ecb0b563ed5b59957	1080	Phobius	NON_CYTOPLASMIC_DOMAIN	Region of a membrane-bound protein predicted to be outside the membrane, in the extracellular region.	672	1080	-	2024-09-09	-	-
Fxa2Dg200222.1	5dc06ad04742036ecb0b563ed5b59957	1080	Phobius	SIGNAL_PEPTIDE_N_REGION	N-terminal region of a signal peptide.	1	6	-	2024-09-09	-	-
Fxa2Dg200222.1	5dc06ad04742036ecb0b563ed5b59957	1080	Phobius	SIGNAL_PEPTIDE_C_REGION	C-terminal region of a signal peptide.	19	26	-	2024-09-09	-	-
Fxa2Dg200222.1	5dc06ad04742036ecb0b563ed5b59957	1080	Phobius	NON_CYTOPLASMIC_DOMAIN	Region of a membrane-bound protein predicted to be outside the membrane, in the extracellular region.	27	200	-	2024-09-09	-	-
Fxa2Dg200222.1	5dc06ad04742036ecb0b563ed5b59957	1080	Phobius	CYTOPLASMIC_DOMAIN	Region of a membrane-bound protein predicted to be outside the membrane, in the cytoplasm.	222	652	-	2024-09-09	-	-
Fxa2Dg200222.1	5dc06ad04742036ecb0b563ed5b59957	1080	Phobius	TRANSMEMBRANE	Region of a membrane-bound protein predicted to be embedded in the membrane.	653	671	-	2024-09-09	-	-
Fxa2Dg200222.1	5dc06ad04742036ecb0b563ed5b59957	1080	Pfam	PF00188	Cysteine-rich secretory protein family	368	449	0.0034	2024-09-09	IPR014044	CAP domain
Fxa2Dg200222.1	5dc06ad04742036ecb0b563ed5b59957	1080	Pfam	PF00188	Cysteine-rich secretory protein family	228	343	5.5e-17	2024-09-09	IPR014044	CAP domain
Fxa2Dg200222.1	5dc06ad04742036ecb0b563ed5b59957	1080	Pfam	PF00188	Cysteine-rich secretory protein family	481	598	7.7e-16	2024-09-09	IPR014044	CAP domain
Fxa2Dg200222.1	5dc06ad04742036ecb0b563ed5b59957	1080	Pfam	PF00188	Cysteine-rich secretory protein family	684	801	2.6e-13	2024-09-09	IPR014044	CAP domain
Fxa2Dg200222.1	5dc06ad04742036ecb0b563ed5b59957	1080	Pfam	PF00188	Cysteine-rich secretory protein family	949	1068	4.2e-11	2024-09-09	IPR014044	CAP domain
Fxa2Dg200222.1	5dc06ad04742036ecb0b563ed5b59957	1080	Pfam	PF00188	Cysteine-rich secretory protein family	44	160	2.3e-15	2024-09-09	IPR014044	CAP domain
Fxa2Dg200222.1	5dc06ad04742036ecb0b563ed5b59957	1080	Pfam	PF00188	Cysteine-rich secretory protein family	838	927	2.2e-05	2024-09-09	IPR014044	CAP domain
Fxa2Dg200222.1	5dc06ad04742036ecb0b563ed5b59957	1080	Phobius	TRANSMEMBRANE	Region of a membrane-bound protein predicted to be embedded in the membrane.	201	221	-	2024-09-09	-	-
Fxa2Dg200222.1	5dc06ad04742036ecb0b563ed5b59957	1080	Phobius	SIGNAL_PEPTIDE	Signal peptide region	1	26	-	2024-09-09	-	-
Fxa2Dg200222.1	5dc06ad04742036ecb0b563ed5b59957	1080	Phobius	SIGNAL_PEPTIDE_H_REGION	Hydrophobic region of a signal peptide.	7	18	-	2024-09-09	-	-
Fxa2Dg200230.1	5ce0559b8c3a5cc29619cfdf1550e8c8	159	Phobius	NON_CYTOPLASMIC_DOMAIN	Region of a membrane-bound protein predicted to be outside the membrane, in the extracellular region.	22	159	-	2024-09-09	-	-
Fxa2Dg200230.1	5ce0559b8c3a5cc29619cfdf1550e8c8	159	Pfam	PF00188	Cysteine-rich secretory protein family	29	147	1.5e-13	2024-09-09	IPR014044	CAP domain
Fxa2Dg200230.1	5ce0559b8c3a5cc29619cfdf1550e8c8	159	Phobius	SIGNAL_PEPTIDE_N_REGION	N-terminal region of a signal peptide.	1	1	-	2024-09-09	-	-
Fxa2Dg200230.1	5ce0559b8c3a5cc29619cfdf1550e8c8	159	Phobius	SIGNAL_PEPTIDE_C_REGION	C-terminal region of a signal peptide.	14	21	-	2024-09-09	-	-
Fxa2Dg200230.1	5ce0559b8c3a5cc29619cfdf1550e8c8	159	Phobius	SIGNAL_PEPTIDE_H_REGION	Hydrophobic region of a signal peptide.	2	13	-	2024-09-09	-	-
Fxa2Dg200230.1	5ce0559b8c3a5cc29619cfdf1550e8c8	159	Phobius	SIGNAL_PEPTIDE	Signal peptide region	1	21	-	2024-09-09	-	-
Fxa2Ag100259.1	fa7759e1b2a538ee563382c0a3f7c888	132	Pfam	PF00188	Cysteine-rich secretory protein family	24	120	1.3e-07	2024-09-09	IPR014044	CAP domain
Fxa2Cg201447.1	45e9217daec829757a757319d4d62aaa	580	Phobius	TRANSMEMBRANE	Region of a membrane-bound protein predicted to be embedded in the membrane.	216	236	-	2024-09-09	-	-
Fxa2Cg201447.1	45e9217daec829757a757319d4d62aaa	580	Phobius	NON_CYTOPLASMIC_DOMAIN	Region of a membrane-bound protein predicted to be outside the membrane, in the extracellular region.	27	215	-	2024-09-09	-	-
Fxa2Cg201447.1	45e9217daec829757a757319d4d62aaa	580	Phobius	CYTOPLASMIC_DOMAIN	Region of a membrane-bound protein predicted to be outside the membrane, in the cytoplasm.	237	521	-	2024-09-09	-	-
Fxa2Cg201447.1	45e9217daec829757a757319d4d62aaa	580	Phobius	SIGNAL_PEPTIDE_C_REGION	C-terminal region of a signal peptide.	19	26	-	2024-09-09	-	-
Fxa2Cg201447.1	45e9217daec829757a757319d4d62aaa	580	Phobius	SIGNAL_PEPTIDE_N_REGION	N-terminal region of a signal peptide.	1	6	-	2024-09-09	-	-
Fxa2Cg201447.1	45e9217daec829757a757319d4d62aaa	580	Phobius	NON_CYTOPLASMIC_DOMAIN	Region of a membrane-bound protein predicted to be outside the membrane, in the extracellular region.	543	580	-	2024-09-09	-	-
Fxa2Cg201447.1	45e9217daec829757a757319d4d62aaa	580	Phobius	SIGNAL_PEPTIDE	Signal peptide region	1	26	-	2024-09-09	-	-
Fxa2Cg201447.1	45e9217daec829757a757319d4d62aaa	580	Pfam	PF00188	Cysteine-rich secretory protein family	44	160	1.4e-16	2024-09-09	IPR014044	CAP domain
Fxa2Cg201447.1	45e9217daec829757a757319d4d62aaa	580	Pfam	PF00188	Cysteine-rich secretory protein family	243	354	8.5e-17	2024-09-09	IPR014044	CAP domain
Fxa2Cg201447.1	45e9217daec829757a757319d4d62aaa	580	Phobius	SIGNAL_PEPTIDE_H_REGION	Hydrophobic region of a signal peptide.	7	18	-	2024-09-09	-	-
Fxa2Cg201447.1	45e9217daec829757a757319d4d62aaa	580	Phobius	TRANSMEMBRANE	Region of a membrane-bound protein predicted to be embedded in the membrane.	522	542	-	2024-09-09	-	-
Fxa2Ag101720.1	95c6c97858bfa17330f40cbae4df8908	226	Phobius	SIGNAL_PEPTIDE_H_REGION	Hydrophobic region of a signal peptide.	3	10	-	2024-09-09	-	-
Fxa2Ag101720.1	95c6c97858bfa17330f40cbae4df8908	226	MobiDBLite	mobidb-lite	consensus disorder prediction	14	84	-	2024-09-09	-	-
Fxa2Ag101720.1	95c6c97858bfa17330f40cbae4df8908	226	Pfam	PF00188	Cysteine-rich secretory protein family	103	219	1e-18	2024-09-09	IPR014044	CAP domain
Fxa2Ag101720.1	95c6c97858bfa17330f40cbae4df8908	226	Phobius	SIGNAL_PEPTIDE_C_REGION	C-terminal region of a signal peptide.	11	15	-	2024-09-09	-	-
Fxa2Ag101720.1	95c6c97858bfa17330f40cbae4df8908	226	Phobius	SIGNAL_PEPTIDE_N_REGION	N-terminal region of a signal peptide.	1	2	-	2024-09-09	-	-
Fxa2Ag101720.1	95c6c97858bfa17330f40cbae4df8908	226	MobiDBLite	mobidb-lite	consensus disorder prediction	23	45	-	2024-09-09	-	-
Fxa2Ag101720.1	95c6c97858bfa17330f40cbae4df8908	226	Phobius	SIGNAL_PEPTIDE	Signal peptide region	1	15	-	2024-09-09	-	-
Fxa2Ag101720.1	95c6c97858bfa17330f40cbae4df8908	226	Phobius	NON_CYTOPLASMIC_DOMAIN	Region of a membrane-bound protein predicted to be outside the membrane, in the extracellular region.	16	226	-	2024-09-09	-	-
Fxa2Ag101720.1	95c6c97858bfa17330f40cbae4df8908	226	MobiDBLite	mobidb-lite	consensus disorder prediction	54	84	-	2024-09-09	-	-
Fxa2Dg200224.1	85e171dd01182bddf5862e39e03ee7c3	136	Pfam	PF00188	Cysteine-rich secretory protein family	16	119	2.9e-09	2024-09-09	IPR014044	CAP domain

## Sheet: PR2
Protein	Run	Length	Prediction	Identifier	Description	Start	End	E-value	Date	InterPro ID	Description
Fxa1Bg200720.1	83704460ea5276d96dea185f1b27229e	331	Phobius	SIGNAL_PEPTIDE	Signal peptide region	1	26	-	29-08-2024	-	-
Fxa1Bg200720.1	83704460ea5276d96dea185f1b27229e	331	Phobius	SIGNAL_PEPTIDE_H_REGION	Hydrophobic region of a signal peptide.	3	14	-	29-08-2024	-	-
Fxa1Bg200720.1	83704460ea5276d96dea185f1b27229e	331	Phobius	NON_CYTOPLASMIC_DOMAIN	Region of a membrane-bound protein predicted to be outside the membrane, in the extracellular region.	27	331	-	29-08-2024	-	-
Fxa1Bg200720.1	83704460ea5276d96dea185f1b27229e	331	Pfam	PF00332	Glycosyl hydrolases family 17	53	291	1.3e-38	29-08-2024	IPR000490	Glycoside hydrolase family 17
Fxa1Bg200720.1	83704460ea5276d96dea185f1b27229e	331	Phobius	SIGNAL_PEPTIDE_N_REGION	N-terminal region of a signal peptide.	1	2	-	29-08-2024	-	-
Fxa1Bg200720.1	83704460ea5276d96dea185f1b27229e	331	Phobius	SIGNAL_PEPTIDE_C_REGION	C-terminal region of a signal peptide.	15	26	-	29-08-2024	-	-
Fxa6Dg103105.1	fc858294c41b58fab45605646a87c12f	540	Phobius	SIGNAL_PEPTIDE_H_REGION	Hydrophobic region of a signal peptide.	20	30	-	29-08-2024	-	-
Fxa6Dg103105.1	fc858294c41b58fab45605646a87c12f	540	Phobius	SIGNAL_PEPTIDE_C_REGION	C-terminal region of a signal peptide.	31	35	-	29-08-2024	-	-
Fxa6Dg103105.1	fc858294c41b58fab45605646a87c12f	540	Pfam	PF00332	Glycosyl hydrolases family 17	37	342	6.3e-100	29-08-2024	IPR000490	Glycoside hydrolase family 17
Fxa6Dg103105.1	fc858294c41b58fab45605646a87c12f	540	Pfam	PF00332	Glycosyl hydrolases family 17	344	539	1.3e-62	29-08-2024	IPR000490	Glycoside hydrolase family 17
Fxa6Dg103105.1	fc858294c41b58fab45605646a87c12f	540	Phobius	SIGNAL_PEPTIDE_N_REGION	N-terminal region of a signal peptide.	1	19	-	29-08-2024	-	-
Fxa6Dg103105.1	fc858294c41b58fab45605646a87c12f	540	Phobius	NON_CYTOPLASMIC_DOMAIN	Region of a membrane-bound protein predicted to be outside the membrane, in the extracellular region.	36	540	-	29-08-2024	-	-
Fxa6Dg103105.1	fc858294c41b58fab45605646a87c12f	540	Phobius	SIGNAL_PEPTIDE	Signal peptide region	1	35	-	29-08-2024	-	-
Fxa1Ag102107.1	7e30c71768659cbf6e43e32b9c7a6cb4	479	Phobius	CYTOPLASMIC_DOMAIN	Region of a membrane-bound protein predicted to be outside the membrane, in the cytoplasm.	479	479	-	29-08-2024	-	-
Fxa1Ag102107.1	7e30c71768659cbf6e43e32b9c7a6cb4	479	Phobius	SIGNAL_PEPTIDE	Signal peptide region	1	23	-	29-08-2024	-	-
Fxa1Ag102107.1	7e30c71768659cbf6e43e32b9c7a6cb4	479	Pfam	PF00332	Glycosyl hydrolases family 17	25	344	1.2e-61	29-08-2024	IPR000490	Glycoside hydrolase family 17
Fxa1Ag102107.1	7e30c71768659cbf6e43e32b9c7a6cb4	479	Phobius	SIGNAL_PEPTIDE_N_REGION	N-terminal region of a signal peptide.	1	3	-	29-08-2024	-	-
Fxa1Ag102107.1	7e30c71768659cbf6e43e32b9c7a6cb4	479	Phobius	SIGNAL_PEPTIDE_H_REGION	Hydrophobic region of a signal peptide.	4	15	-	29-08-2024	-	-
Fxa1Ag102107.1	7e30c71768659cbf6e43e32b9c7a6cb4	479	Phobius	TRANSMEMBRANE	Region of a membrane-bound protein predicted to be embedded in the membrane.	460	478	-	29-08-2024	-	-
Fxa1Ag102107.1	7e30c71768659cbf6e43e32b9c7a6cb4	479	Pfam	PF07983	X8 domain	366	436	1.6e-10	29-08-2024	IPR012946	X8 domain
Fxa1Ag102107.1	7e30c71768659cbf6e43e32b9c7a6cb4	479	Phobius	SIGNAL_PEPTIDE_C_REGION	C-terminal region of a signal peptide.	16	23	-	29-08-2024	-	-
Fxa1Ag102107.1	7e30c71768659cbf6e43e32b9c7a6cb4	479	Phobius	NON_CYTOPLASMIC_DOMAIN	Region of a membrane-bound protein predicted to be outside the membrane, in the extracellular region.	24	459	-	29-08-2024	-	-
Fxa1Dg200668.1	0c691b01bc62e09e8c91ceeee745bc9d	360	Phobius	SIGNAL_PEPTIDE	Signal peptide region	1	26	-	29-08-2024	-	-
Fxa1Dg200668.1	0c691b01bc62e09e8c91ceeee745bc9d	360	Phobius	NON_CYTOPLASMIC_DOMAIN	Region of a membrane-bound protein predicted to be outside the membrane, in the extracellular region.	27	360	-	29-08-2024	-	-
Fxa1Dg200668.1	0c691b01bc62e09e8c91ceeee745bc9d	360	Phobius	SIGNAL_PEPTIDE_H_REGION	Hydrophobic region of a signal peptide.	3	14	-	29-08-2024	-	-
Fxa1Dg200668.1	0c691b01bc62e09e8c91ceeee745bc9d	360	Pfam	PF00332	Glycosyl hydrolases family 17	29	322	1.8e-74	29-08-2024	IPR000490	Glycoside hydrolase family 17
Fxa1Dg200668.1	0c691b01bc62e09e8c91ceeee745bc9d	360	Phobius	SIGNAL_PEPTIDE_N_REGION	N-terminal region of a signal peptide.	1	2	-	29-08-2024	-	-
Fxa1Dg200668.1	0c691b01bc62e09e8c91ceeee745bc9d	360	Phobius	SIGNAL_PEPTIDE_C_REGION	C-terminal region of a signal peptide.	15	26	-	29-08-2024	-	-
Fxa3Cg103300.1	a3625e0d8399ee29a923d9533d6ae7ae	505	Pfam	PF07983	X8 domain	388	455	1.3e-11	29-08-2024	IPR012946	X8 domain
Fxa3Cg103300.1	a3625e0d8399ee29a923d9533d6ae7ae	505	Phobius	CYTOPLASMIC_DOMAIN	Region of a membrane-bound protein predicted to be outside the membrane, in the cytoplasm.	502	505	-	29-08-2024	-	-
Fxa3Cg103300.1	a3625e0d8399ee29a923d9533d6ae7ae	505	Phobius	TRANSMEMBRANE	Region of a membrane-bound protein predicted to be embedded in the membrane.	481	501	-	29-08-2024	-	-
Fxa3Cg103300.1	a3625e0d8399ee29a923d9533d6ae7ae	505	Phobius	NON_CYTOPLASMIC_DOMAIN	Region of a membrane-bound protein predicted to be outside the membrane, in the extracellular region.	1	480	-	29-08-2024	-	-
Fxa3Cg103300.1	a3625e0d8399ee29a923d9533d6ae7ae	505	Pfam	PF00332	Glycosyl hydrolases family 17	132	368	3.1e-41	29-08-2024	IPR000490	Glycoside hydrolase family 17
Fxa3Cg103300.1	a3625e0d8399ee29a923d9533d6ae7ae	505	Pfam	PF00332	Glycosyl hydrolases family 17	8	88	1.8e-11	29-08-2024	IPR000490	Glycoside hydrolase family 17
Fxa3Dg202938.1	33791ee82270eae106479c6acd15d8f7	523	Pfam	PF00332	Glycosyl hydrolases family 17	24	337	1.6e-75	29-08-2024	IPR000490	Glycoside hydrolase family 17
Fxa3Dg202938.1	33791ee82270eae106479c6acd15d8f7	523	Phobius	SIGNAL_PEPTIDE_C_REGION	C-terminal region of a signal peptide.	21	25	-	29-08-2024	-	-
Fxa3Dg202938.1	33791ee82270eae106479c6acd15d8f7	523	Phobius	SIGNAL_PEPTIDE	Signal peptide region	1	25	-	29-08-2024	-	-
Fxa3Dg202938.1	33791ee82270eae106479c6acd15d8f7	523	Phobius	NON_CYTOPLASMIC_DOMAIN	Region of a membrane-bound protein predicted to be outside the membrane, in the extracellular region.	26	523	-	29-08-2024	-	-
Fxa3Dg202938.1	33791ee82270eae106479c6acd15d8f7	523	Phobius	SIGNAL_PEPTIDE_H_REGION	Hydrophobic region of a signal peptide.	6	20	-	29-08-2024	-	-
Fxa3Dg202938.1	33791ee82270eae106479c6acd15d8f7	523	Phobius	SIGNAL_PEPTIDE_N_REGION	N-terminal region of a signal peptide.	1	5	-	29-08-2024	-	-
Fxa3Dg202938.1	33791ee82270eae106479c6acd15d8f7	523	Pfam	PF07983	X8 domain	379	449	8.1e-20	29-08-2024	IPR012946	X8 domain
Fxa1Bg200265.2	ef8322ee3f50ff2d6adb7858739c005b	246	Phobius	CYTOPLASMIC_DOMAIN	Region of a membrane-bound protein predicted to be outside the membrane, in the cytoplasm.	237	246	-	29-08-2024	-	-
Fxa1Bg200265.2	ef8322ee3f50ff2d6adb7858739c005b	246	Phobius	NON_CYTOPLASMIC_DOMAIN	Region of a membrane-bound protein predicted to be outside the membrane, in the extracellular region.	1	216	-	29-08-2024	-	-
Fxa1Bg200265.2	ef8322ee3f50ff2d6adb7858739c005b	246	Phobius	TRANSMEMBRANE	Region of a membrane-bound protein predicted to be embedded in the membrane.	217	236	-	29-08-2024	-	-
Fxa1Bg200265.2	ef8322ee3f50ff2d6adb7858739c005b	246	Pfam	PF00332	Glycosyl hydrolases family 17	18	216	3.1e-40	29-08-2024	IPR000490	Glycoside hydrolase family 17
Fxa2Dg202617.1	8ec5659c02c7815eb8655041300a88b8	482	Phobius	TRANSMEMBRANE	Region of a membrane-bound protein predicted to be embedded in the membrane.	465	481	-	29-08-2024	-	-
Fxa2Dg202617.1	8ec5659c02c7815eb8655041300a88b8	482	Phobius	SIGNAL_PEPTIDE	Signal peptide region	1	23	-	29-08-2024	-	-
Fxa2Dg202617.1	8ec5659c02c7815eb8655041300a88b8	482	Phobius	SIGNAL_PEPTIDE_N_REGION	N-terminal region of a signal peptide.	1	6	-	29-08-2024	-	-
Fxa2Dg202617.1	8ec5659c02c7815eb8655041300a88b8	482	Phobius	SIGNAL_PEPTIDE_C_REGION	C-terminal region of a signal peptide.	19	23	-	29-08-2024	-	-
Fxa2Dg202617.1	8ec5659c02c7815eb8655041300a88b8	482	Pfam	PF07983	X8 domain	361	430	8.5e-10	29-08-2024	IPR012946	X8 domain
Fxa2Dg202617.1	8ec5659c02c7815eb8655041300a88b8	482	Phobius	CYTOPLASMIC_DOMAIN	Region of a membrane-bound protein predicted to be outside the membrane, in the cytoplasm.	482	482	-	29-08-2024	-	-
Fxa2Dg202617.1	8ec5659c02c7815eb8655041300a88b8	482	Pfam	PF00332	Glycosyl hydrolases family 17	24	342	3.5e-63	29-08-2024	IPR000490	Glycoside hydrolase family 17
Fxa2Dg202617.1	8ec5659c02c7815eb8655041300a88b8	482	Phobius	NON_CYTOPLASMIC_DOMAIN	Region of a membrane-bound protein predicted to be outside the membrane, in the extracellular region.	24	464	-	29-08-2024	-	-
Fxa2Dg202617.1	8ec5659c02c7815eb8655041300a88b8	482	Phobius	SIGNAL_PEPTIDE_H_REGION	Hydrophobic region of a signal peptide.	7	18	-	29-08-2024	-	-
Fxa3Ag102739.1	630948836e3920658f10ff27cbbeedf6	346	Phobius	SIGNAL_PEPTIDE_N_REGION	N-terminal region of a signal peptide.	1	15	-	29-08-2024	-	-
Fxa3Ag102739.1	630948836e3920658f10ff27cbbeedf6	346	Phobius	SIGNAL_PEPTIDE_C_REGION	C-terminal region of a signal peptide.	28	34	-	29-08-2024	-	-
Fxa3Ag102739.1	630948836e3920658f10ff27cbbeedf6	346	Phobius	NON_CYTOPLASMIC_DOMAIN	Region of a membrane-bound protein predicted to be outside the membrane, in the extracellular region.	35	346	-	29-08-2024	-	-
Fxa3Ag102739.1	630948836e3920658f10ff27cbbeedf6	346	Phobius	SIGNAL_PEPTIDE	Signal peptide region	1	34	-	29-08-2024	-	-
Fxa3Ag102739.1	630948836e3920658f10ff27cbbeedf6	346	Pfam	PF00332	Glycosyl hydrolases family 17	36	345	1.1e-106	29-08-2024	IPR000490	Glycoside hydrolase family 17
Fxa3Ag102739.1	630948836e3920658f10ff27cbbeedf6	346	Phobius	SIGNAL_PEPTIDE_H_REGION	Hydrophobic region of a signal peptide.	16	27	-	29-08-2024	-	-
Fxa3Cg102355.1	c6e87f811d564ff0eefd080ee63ec824	346	Phobius	SIGNAL_PEPTIDE_N_REGION	N-terminal region of a signal peptide.	1	15	-	29-08-2024	-	-
Fxa3Cg102355.1	c6e87f811d564ff0eefd080ee63ec824	346	Phobius	SIGNAL_PEPTIDE_C_REGION	C-terminal region of a signal peptide.	28	34	-	29-08-2024	-	-
Fxa3Cg102355.1	c6e87f811d564ff0eefd080ee63ec824	346	Phobius	NON_CYTOPLASMIC_DOMAIN	Region of a membrane-bound protein predicted to be outside the membrane, in the extracellular region.	35	346	-	29-08-2024	-	-
Fxa3Cg102355.1	c6e87f811d564ff0eefd080ee63ec824	346	Phobius	SIGNAL_PEPTIDE	Signal peptide region	1	34	-	29-08-2024	-	-
Fxa3Cg102355.1	c6e87f811d564ff0eefd080ee63ec824	346	Phobius	SIGNAL_PEPTIDE_H_REGION	Hydrophobic region of a signal peptide.	16	27	-	29-08-2024	-	-
Fxa3Cg102355.1	c6e87f811d564ff0eefd080ee63ec824	346	Pfam	PF00332	Glycosyl hydrolases family 17	36	345	1.7e-106	29-08-2024	IPR000490	Glycoside hydrolase family 17
Fxa1Ag100758.1	03417c7203f0822ff7ced5e564fed58b	130	Pfam	PF00332	Glycosyl hydrolases family 17	7	120	6.9e-25	29-08-2024	IPR000490	Glycoside hydrolase family 17
Fxa5Cg200783.1	b3f866cbfe2608472dfb335f52282cdb	572	MobiDBLite	mobidb-lite	consensus disorder prediction	476	499	-	29-08-2024	-	-
Fxa5Cg200783.1	b3f866cbfe2608472dfb335f52282cdb	572	Phobius	NON_CYTOPLASMIC_DOMAIN	Region of a membrane-bound protein predicted to be outside the membrane, in the extracellular region.	143	572	-	29-08-2024	-	-
Fxa5Cg200783.1	b3f866cbfe2608472dfb335f52282cdb	572	Pfam	PF00332	Glycosyl hydrolases family 17	149	467	2.7e-81	29-08-2024	IPR000490	Glycoside hydrolase family 17
Fxa5Cg200783.1	b3f866cbfe2608472dfb335f52282cdb	572	Phobius	CYTOPLASMIC_DOMAIN	Region of a membrane-bound protein predicted to be outside the membrane, in the cytoplasm.	1	123	-	29-08-2024	-	-
Fxa5Cg200783.1	b3f866cbfe2608472dfb335f52282cdb	572	Phobius	TRANSMEMBRANE	Region of a membrane-bound protein predicted to be embedded in the membrane.	124	142	-	29-08-2024	-	-
Fxa3Ag104259.1	bd80ca95384119839975f4fd31a686f7	773	Pfam	PF07983	X8 domain	664	734	8.7e-17	29-08-2024	IPR012946	X8 domain
Fxa3Ag104259.1	bd80ca95384119839975f4fd31a686f7	773	Pfam	PF00332	Glycosyl hydrolases family 17	330	649	9.5e-68	29-08-2024	IPR000490	Glycoside hydrolase family 17
Fxa3Ag104259.1	bd80ca95384119839975f4fd31a686f7	773	Pfam	PF00076	RNA recognition motif	41	110	6e-14	29-08-2024	IPR000504	RNA recognition motif domain
Fxa3Ag104259.1	bd80ca95384119839975f4fd31a686f7	773	Phobius	TRANSMEMBRANE	Region of a membrane-bound protein predicted to be embedded in the membrane.	296	322	-	29-08-2024	-	-
Fxa3Ag104259.1	bd80ca95384119839975f4fd31a686f7	773	MobiDBLite	mobidb-lite	consensus disorder prediction	117	247	-	29-08-2024	-	-
Fxa3Ag104259.1	bd80ca95384119839975f4fd31a686f7	773	MobiDBLite	mobidb-lite	consensus disorder prediction	200	238	-	29-08-2024	-	-
Fxa3Ag104259.1	bd80ca95384119839975f4fd31a686f7	773	MobiDBLite	mobidb-lite	consensus disorder prediction	117	146	-	29-08-2024	-	-
Fxa3Ag104259.1	bd80ca95384119839975f4fd31a686f7	773	MobiDBLite	mobidb-lite	consensus disorder prediction	1	40	-	29-08-2024	-	-
Fxa3Ag104259.1	bd80ca95384119839975f4fd31a686f7	773	MobiDBLite	mobidb-lite	consensus disorder prediction	165	198	-	29-08-2024	-	-
Fxa3Ag104259.1	bd80ca95384119839975f4fd31a686f7	773	Phobius	NON_CYTOPLASMIC_DOMAIN	Region of a membrane-bound protein predicted to be outside the membrane, in the extracellular region.	323	773	-	29-08-2024	-	-
Fxa3Ag104259.1	bd80ca95384119839975f4fd31a686f7	773	Phobius	CYTOPLASMIC_DOMAIN	Region of a membrane-bound protein predicted to be outside the membrane, in the cytoplasm.	1	295	-	29-08-2024	-	-
Fxa3Dg200451.1	f772612969acd1ca02a98bf00e05ea1e	410	Phobius	SIGNAL_PEPTIDE	Signal peptide region	1	28	-	29-08-2024	-	-
Fxa3Dg200451.1	f772612969acd1ca02a98bf00e05ea1e	410	Pfam	PF00332	Glycosyl hydrolases family 17	29	346	6e-77	29-08-2024	IPR000490	Glycoside hydrolase family 17
Fxa3Dg200451.1	f772612969acd1ca02a98bf00e05ea1e	410	Phobius	SIGNAL_PEPTIDE_C_REGION	C-terminal region of a signal peptide.	24	28	-	29-08-2024	-	-
Fxa3Dg200451.1	f772612969acd1ca02a98bf00e05ea1e	410	Phobius	NON_CYTOPLASMIC_DOMAIN	Region of a membrane-bound protein predicted to be outside the membrane, in the extracellular region.	29	410	-	29-08-2024	-	-
Fxa3Dg200451.1	f772612969acd1ca02a98bf00e05ea1e	410	Phobius	SIGNAL_PEPTIDE_N_REGION	N-terminal region of a signal peptide.	1	11	-	29-08-2024	-	-
Fxa3Dg200451.1	f772612969acd1ca02a98bf00e05ea1e	410	Phobius	SIGNAL_PEPTIDE_H_REGION	Hydrophobic region of a signal peptide.	12	23	-	29-08-2024	-	-
Fxa2Ag101879.1	dc83e98453102c828752f81da2d8b6cd	453	Phobius	SIGNAL_PEPTIDE_H_REGION	Hydrophobic region of a signal peptide.	3	15	-	29-08-2024	-	-
Fxa2Ag101879.1	dc83e98453102c828752f81da2d8b6cd	453	Phobius	SIGNAL_PEPTIDE_N_REGION	N-terminal region of a signal peptide.	1	2	-	29-08-2024	-	-
Fxa2Ag101879.1	dc83e98453102c828752f81da2d8b6cd	453	Phobius	SIGNAL_PEPTIDE	Signal peptide region	1	20	-	29-08-2024	-	-
Fxa2Ag101879.1	dc83e98453102c828752f81da2d8b6cd	453	Pfam	PF00332	Glycosyl hydrolases family 17	26	347	6.4e-94	29-08-2024	IPR000490	Glycoside hydrolase family 17
Fxa2Ag101879.1	dc83e98453102c828752f81da2d8b6cd	453	Phobius	SIGNAL_PEPTIDE_C_REGION	C-terminal region of a signal peptide.	16	20	-	29-08-2024	-	-
Fxa2Ag101879.1	dc83e98453102c828752f81da2d8b6cd	453	Phobius	NON_CYTOPLASMIC_DOMAIN	Region of a membrane-bound protein predicted to be outside the membrane, in the extracellular region.	21	453	-	29-08-2024	-	-
Fxa2Ag101879.1	dc83e98453102c828752f81da2d8b6cd	453	Pfam	PF07983	X8 domain	374	444	1.3e-16	29-08-2024	IPR012946	X8 domain
Fxa1Bg201989.1	fad5bc7952b4744923f7e3d659151aef	479	Pfam	PF07983	X8 domain	366	436	1.6e-10	29-08-2024	IPR012946	X8 domain
Fxa1Bg201989.1	fad5bc7952b4744923f7e3d659151aef	479	Phobius	CYTOPLASMIC_DOMAIN	Region of a membrane-bound protein predicted to be outside the membrane, in the cytoplasm.	479	479	-	29-08-2024	-	-
Fxa1Bg201989.1	fad5bc7952b4744923f7e3d659151aef	479	Phobius	SIGNAL_PEPTIDE	Signal peptide region	1	23	-	29-08-2024	-	-
Fxa1Bg201989.1	fad5bc7952b4744923f7e3d659151aef	479	Phobius	SIGNAL_PEPTIDE_H_REGION	Hydrophobic region of a signal peptide.	4	15	-	29-08-2024	-	-
Fxa1Bg201989.1	fad5bc7952b4744923f7e3d659151aef	479	Phobius	SIGNAL_PEPTIDE_N_REGION	N-terminal region of a signal peptide.	1	3	-	29-08-2024	-	-
Fxa1Bg201989.1	fad5bc7952b4744923f7e3d659151aef	479	Phobius	TRANSMEMBRANE	Region of a membrane-bound protein predicted to be embedded in the membrane.	460	478	-	29-08-2024	-	-
Fxa1Bg201989.1	fad5bc7952b4744923f7e3d659151aef	479	Pfam	PF00332	Glycosyl hydrolases family 17	25	344	5e-62	29-08-2024	IPR000490	Glycoside hydrolase family 17
Fxa1Bg201989.1	fad5bc7952b4744923f7e3d659151aef	479	Phobius	SIGNAL_PEPTIDE_C_REGION	C-terminal region of a signal peptide.	16	23	-	29-08-2024	-	-
Fxa1Bg201989.1	fad5bc7952b4744923f7e3d659151aef	479	Phobius	NON_CYTOPLASMIC_DOMAIN	Region of a membrane-bound protein predicted to be outside the membrane, in the extracellular region.	24	459	-	29-08-2024	-	-
Fxa4Ag101943.1	9a72c2585b866b5fc7e6bd4af34acb3a	371	Phobius	SIGNAL_PEPTIDE_N_REGION	N-terminal region of a signal peptide.	1	15	-	29-08-2024	-	-
Fxa4Ag101943.1	9a72c2585b866b5fc7e6bd4af34acb3a	371	Phobius	NON_CYTOPLASMIC_DOMAIN	Region of a membrane-bound protein predicted to be outside the membrane, in the extracellular region.	33	371	-	29-08-2024	-	-
Fxa4Ag101943.1	9a72c2585b866b5fc7e6bd4af34acb3a	371	Phobius	SIGNAL_PEPTIDE_C_REGION	C-terminal region of a signal peptide.	28	32	-	29-08-2024	-	-
Fxa4Ag101943.1	9a72c2585b866b5fc7e6bd4af34acb3a	371	Pfam	PF00332	Glycosyl hydrolases family 17	34	345	6.5e-109	29-08-2024	IPR000490	Glycoside hydrolase family 17
Fxa4Ag101943.1	9a72c2585b866b5fc7e6bd4af34acb3a	371	Phobius	SIGNAL_PEPTIDE	Signal peptide region	1	32	-	29-08-2024	-	-
Fxa4Ag101943.1	9a72c2585b866b5fc7e6bd4af34acb3a	371	Phobius	SIGNAL_PEPTIDE_H_REGION	Hydrophobic region of a signal peptide.	16	27	-	29-08-2024	-	-
Fxa6Cg103192.1	0352ac27a431c5678145512bd49643db	349	Phobius	SIGNAL_PEPTIDE_H_REGION	Hydrophobic region of a signal peptide.	20	30	-	29-08-2024	-	-
Fxa6Cg103192.1	0352ac27a431c5678145512bd49643db	349	Phobius	NON_CYTOPLASMIC_DOMAIN	Region of a membrane-bound protein predicted to be outside the membrane, in the extracellular region.	36	349	-	29-08-2024	-	-
Fxa6Cg103192.1	0352ac27a431c5678145512bd49643db	349	Phobius	SIGNAL_PEPTIDE_C_REGION	C-terminal region of a signal peptide.	31	35	-	29-08-2024	-	-
Fxa6Cg103192.1	0352ac27a431c5678145512bd49643db	349	Pfam	PF00332	Glycosyl hydrolases family 17	37	348	1.9e-102	29-08-2024	IPR000490	Glycoside hydrolase family 17
Fxa6Cg103192.1	0352ac27a431c5678145512bd49643db	349	Phobius	SIGNAL_PEPTIDE_N_REGION	N-terminal region of a signal peptide.	1	19	-	29-08-2024	-	-
Fxa6Cg103192.1	0352ac27a431c5678145512bd49643db	349	Phobius	SIGNAL_PEPTIDE	Signal peptide region	1	35	-	29-08-2024	-	-
Fxa3Dg203634.1	e29e4af4eca6e922a0a313e21ed1fc86	796	Phobius	CYTOPLASMIC_DOMAIN	Region of a membrane-bound protein predicted to be outside the membrane, in the cytoplasm.	1	293	-	29-08-2024	-	-
Fxa3Dg203634.1	e29e4af4eca6e922a0a313e21ed1fc86	796	Pfam	PF07983	X8 domain	662	732	9.1e-17	29-08-2024	IPR012946	X8 domain
Fxa3Dg203634.1	e29e4af4eca6e922a0a313e21ed1fc86	796	Pfam	PF00076	RNA recognition motif	41	110	6.2e-14	29-08-2024	IPR000504	RNA recognition motif domain
Fxa3Dg203634.1	e29e4af4eca6e922a0a313e21ed1fc86	796	Phobius	NON_CYTOPLASMIC_DOMAIN	Region of a membrane-bound protein predicted to be outside the membrane, in the extracellular region.	321	796	-	29-08-2024	-	-
Fxa3Dg203634.1	e29e4af4eca6e922a0a313e21ed1fc86	796	Phobius	TRANSMEMBRANE	Region of a membrane-bound protein predicted to be embedded in the membrane.	294	320	-	29-08-2024	-	-
Fxa3Dg203634.1	e29e4af4eca6e922a0a313e21ed1fc86	796	MobiDBLite	mobidb-lite	consensus disorder prediction	117	249	-	29-08-2024	-	-
Fxa3Dg203634.1	e29e4af4eca6e922a0a313e21ed1fc86	796	MobiDBLite	mobidb-lite	consensus disorder prediction	200	238	-	29-08-2024	-	-
Fxa3Dg203634.1	e29e4af4eca6e922a0a313e21ed1fc86	796	MobiDBLite	mobidb-lite	consensus disorder prediction	117	146	-	29-08-2024	-	-
Fxa3Dg203634.1	e29e4af4eca6e922a0a313e21ed1fc86	796	MobiDBLite	mobidb-lite	consensus disorder prediction	1	40	-	29-08-2024	-	-
Fxa3Dg203634.1	e29e4af4eca6e922a0a313e21ed1fc86	796	Pfam	PF00332	Glycosyl hydrolases family 17	328	647	9.6e-69	29-08-2024	IPR000490	Glycoside hydrolase family 17
Fxa4Dg102641.1	f80335e25615ecb6f3c8cbf0d0e59b4f	506	Pfam	PF00332	Glycosyl hydrolases family 17	30	350	2.9e-74	29-08-2024	IPR000490	Glycoside hydrolase family 17
Fxa4Dg102641.1	f80335e25615ecb6f3c8cbf0d0e59b4f	506	Pfam	PF07983	X8 domain	367	438	4.3e-17	29-08-2024	IPR012946	X8 domain
Fxa4Dg102641.1	f80335e25615ecb6f3c8cbf0d0e59b4f	506	Phobius	NON_CYTOPLASMIC_DOMAIN	Region of a membrane-bound protein predicted to be outside the membrane, in the extracellular region.	25	481	-	29-08-2024	-	-
Fxa4Dg102641.1	f80335e25615ecb6f3c8cbf0d0e59b4f	506	Phobius	SIGNAL_PEPTIDE	Signal peptide region	1	24	-	29-08-2024	-	-
Fxa4Dg102641.1	f80335e25615ecb6f3c8cbf0d0e59b4f	506	Phobius	SIGNAL_PEPTIDE_N_REGION	N-terminal region of a signal peptide.	1	8	-	29-08-2024	-	-
Fxa4Dg102641.1	f80335e25615ecb6f3c8cbf0d0e59b4f	506	Phobius	TRANSMEMBRANE	Region of a membrane-bound protein predicted to be embedded in the membrane.	482	505	-	29-08-2024	-	-
Fxa4Dg102641.1	f80335e25615ecb6f3c8cbf0d0e59b4f	506	Phobius	SIGNAL_PEPTIDE_H_REGION	Hydrophobic region of a signal peptide.	9	19	-	29-08-2024	-	-
Fxa4Dg102641.1	f80335e25615ecb6f3c8cbf0d0e59b4f	506	Phobius	CYTOPLASMIC_DOMAIN	Region of a membrane-bound protein predicted to be outside the membrane, in the cytoplasm.	506	506	-	29-08-2024	-	-
Fxa4Dg102641.1	f80335e25615ecb6f3c8cbf0d0e59b4f	506	Phobius	SIGNAL_PEPTIDE_C_REGION	C-terminal region of a signal peptide.	20	24	-	29-08-2024	-	-
Fxa7Ag202338.1	d1c6de905ccdcd9914b2a170d4b6078b	204	Phobius	TRANSMEMBRANE	Region of a membrane-bound protein predicted to be embedded in the membrane.	175	195	-	29-08-2024	-	-
Fxa7Ag202338.1	d1c6de905ccdcd9914b2a170d4b6078b	204	Phobius	NON_CYTOPLASMIC_DOMAIN	Region of a membrane-bound protein predicted to be outside the membrane, in the extracellular region.	147	174	-	29-08-2024	-	-
Fxa7Ag202338.1	d1c6de905ccdcd9914b2a170d4b6078b	204	Phobius	TRANSMEMBRANE	Region of a membrane-bound protein predicted to be embedded in the membrane.	128	146	-	29-08-2024	-	-
Fxa7Ag202338.1	d1c6de905ccdcd9914b2a170d4b6078b	204	Phobius	CYTOPLASMIC_DOMAIN	Region of a membrane-bound protein predicted to be outside the membrane, in the cytoplasm.	196	204	-	29-08-2024	-	-
Fxa7Ag202338.1	d1c6de905ccdcd9914b2a170d4b6078b	204	Pfam	PF00332	Glycosyl hydrolases family 17	27	154	8.6e-09	29-08-2024	IPR000490	Glycoside hydrolase family 17
Fxa7Ag202338.1	d1c6de905ccdcd9914b2a170d4b6078b	204	Phobius	CYTOPLASMIC_DOMAIN	Region of a membrane-bound protein predicted to be outside the membrane, in the cytoplasm.	1	127	-	29-08-2024	-	-
unannotated:chr6A_25208188-25208375_frame6	1f72f8c6a5e9f27dbc813e92fa4d3c29	63	Pfam	PF00332	Glycosyl hydrolases family 17	4	61	1.1e-11	29-08-2024	IPR000490	Glycoside hydrolase family 17
Fxa1Cg100834.1	55503ec1e501aef99d9db79415fd80da	500	Phobius	SIGNAL_PEPTIDE_N_REGION	N-terminal region of a signal peptide.	1	7	-	29-08-2024	-	-
Fxa1Cg100834.1	55503ec1e501aef99d9db79415fd80da	500	Phobius	SIGNAL_PEPTIDE_H_REGION	Hydrophobic region of a signal peptide.	8	19	-	29-08-2024	-	-
Fxa1Cg100834.1	55503ec1e501aef99d9db79415fd80da	500	Phobius	SIGNAL_PEPTIDE	Signal peptide region	1	24	-	29-08-2024	-	-
Fxa1Cg100834.1	55503ec1e501aef99d9db79415fd80da	500	Phobius	SIGNAL_PEPTIDE_C_REGION	C-terminal region of a signal peptide.	20	24	-	29-08-2024	-	-
Fxa1Cg100834.1	55503ec1e501aef99d9db79415fd80da	500	Pfam	PF07983	X8 domain	363	432	7.5e-11	29-08-2024	IPR012946	X8 domain
Fxa1Cg100834.1	55503ec1e501aef99d9db79415fd80da	500	Phobius	NON_CYTOPLASMIC_DOMAIN	Region of a membrane-bound protein predicted to be outside the membrane, in the extracellular region.	25	500	-	29-08-2024	-	-
Fxa1Cg100834.1	55503ec1e501aef99d9db79415fd80da	500	Pfam	PF00332	Glycosyl hydrolases family 17	27	344	9.9e-57	29-08-2024	IPR000490	Glycoside hydrolase family 17
Fxa6Dg103492.1	2387136e6e1558817cdafa02d15681e9	471	Phobius	SIGNAL_PEPTIDE_H_REGION	Hydrophobic region of a signal peptide.	6	17	-	29-08-2024	-	-
Fxa6Dg103492.1	2387136e6e1558817cdafa02d15681e9	471	Pfam	PF00332	Glycosyl hydrolases family 17	25	344	8.1e-84	29-08-2024	IPR000490	Glycoside hydrolase family 17
Fxa6Dg103492.1	2387136e6e1558817cdafa02d15681e9	471	Pfam	PF07983	X8 domain	383	454	5.4e-20	29-08-2024	IPR012946	X8 domain
Fxa6Dg103492.1	2387136e6e1558817cdafa02d15681e9	471	Phobius	SIGNAL_PEPTIDE_C_REGION	C-terminal region of a signal peptide.	18	22	-	29-08-2024	-	-
Fxa6Dg103492.1	2387136e6e1558817cdafa02d15681e9	471	Phobius	NON_CYTOPLASMIC_DOMAIN	Region of a membrane-bound protein predicted to be outside the membrane, in the extracellular region.	23	471	-	29-08-2024	-	-
Fxa6Dg103492.1	2387136e6e1558817cdafa02d15681e9	471	Phobius	SIGNAL_PEPTIDE_N_REGION	N-terminal region of a signal peptide.	1	5	-	29-08-2024	-	-
Fxa6Dg103492.1	2387136e6e1558817cdafa02d15681e9	471	Phobius	SIGNAL_PEPTIDE	Signal peptide region	1	22	-	29-08-2024	-	-
Fxa2Dg203463.1	2a67834225470b1cab8dc60207587181	487	Pfam	PF07983	X8 domain	392	462	5.3e-17	29-08-2024	IPR012946	X8 domain
Fxa2Dg203463.1	2a67834225470b1cab8dc60207587181	487	Phobius	SIGNAL_PEPTIDE_C_REGION	C-terminal region of a signal peptide.	15	22	-	29-08-2024	-	-
Fxa2Dg203463.1	2a67834225470b1cab8dc60207587181	487	MobiDBLite	mobidb-lite	consensus disorder prediction	348	384	-	29-08-2024	-	-
Fxa2Dg203463.1	2a67834225470b1cab8dc60207587181	487	Pfam	PF00332	Glycosyl hydrolases family 17	26	343	1e-76	29-08-2024	IPR000490	Glycoside hydrolase family 17
Fxa2Dg203463.1	2a67834225470b1cab8dc60207587181	487	Phobius	SIGNAL_PEPTIDE_N_REGION	N-terminal region of a signal peptide.	1	2	-	29-08-2024	-	-
Fxa2Dg203463.1	2a67834225470b1cab8dc60207587181	487	MobiDBLite	mobidb-lite	consensus disorder prediction	358	382	-	29-08-2024	-	-
Fxa2Dg203463.1	2a67834225470b1cab8dc60207587181	487	Phobius	SIGNAL_PEPTIDE_H_REGION	Hydrophobic region of a signal peptide.	3	14	-	29-08-2024	-	-
Fxa2Dg203463.1	2a67834225470b1cab8dc60207587181	487	Phobius	NON_CYTOPLASMIC_DOMAIN	Region of a membrane-bound protein predicted to be outside the membrane, in the extracellular region.	23	487	-	29-08-2024	-	-
Fxa2Dg203463.1	2a67834225470b1cab8dc60207587181	487	Phobius	SIGNAL_PEPTIDE	Signal peptide region	1	22	-	29-08-2024	-	-
Fxa1Ag100274.2	5c933f4764e639de89075466e2163009	375	Pfam	PF00332	Glycosyl hydrolases family 17	18	337	1e-74	29-08-2024	IPR000490	Glycoside hydrolase family 17
Fxa3Cg103016.1	0d6157638bbba5f368ba2ea9fa41c7a0	527	Phobius	SIGNAL_PEPTIDE_C_REGION	C-terminal region of a signal peptide.	21	25	-	29-08-2024	-	-
Fxa3Cg103016.1	0d6157638bbba5f368ba2ea9fa41c7a0	527	Phobius	NON_CYTOPLASMIC_DOMAIN	Region of a membrane-bound protein predicted to be outside the membrane, in the extracellular region.	26	527	-	29-08-2024	-	-
Fxa3Cg103016.1	0d6157638bbba5f368ba2ea9fa41c7a0	527	Pfam	PF07983	X8 domain	382	452	1.6e-19	29-08-2024	IPR012946	X8 domain
Fxa3Cg103016.1	0d6157638bbba5f368ba2ea9fa41c7a0	527	Phobius	SIGNAL_PEPTIDE	Signal peptide region	1	25	-	29-08-2024	-	-
Fxa3Cg103016.1	0d6157638bbba5f368ba2ea9fa41c7a0	527	MobiDBLite	mobidb-lite	consensus disorder prediction	346	369	-	29-08-2024	-	-
Fxa3Cg103016.1	0d6157638bbba5f368ba2ea9fa41c7a0	527	Phobius	SIGNAL_PEPTIDE_H_REGION	Hydrophobic region of a signal peptide.	6	20	-	29-08-2024	-	-
Fxa3Cg103016.1	0d6157638bbba5f368ba2ea9fa41c7a0	527	Phobius	SIGNAL_PEPTIDE_N_REGION	N-terminal region of a signal peptide.	1	5	-	29-08-2024	-	-
Fxa3Cg103016.1	0d6157638bbba5f368ba2ea9fa41c7a0	527	Pfam	PF00332	Glycosyl hydrolases family 17	24	337	6.9e-75	29-08-2024	IPR000490	Glycoside hydrolase family 17
Fxa7Dg102048.1	02d83cd2317eb476dca495d8a9f910d8	186	MobiDBLite	mobidb-lite	consensus disorder prediction	1	39	-	29-08-2024	-	-
Fxa7Dg102048.1	02d83cd2317eb476dca495d8a9f910d8	186	MobiDBLite	mobidb-lite	consensus disorder prediction	171	186	-	29-08-2024	-	-
Fxa7Dg102048.1	02d83cd2317eb476dca495d8a9f910d8	186	MobiDBLite	mobidb-lite	consensus disorder prediction	145	186	-	29-08-2024	-	-
Fxa7Dg102048.1	02d83cd2317eb476dca495d8a9f910d8	186	MobiDBLite	mobidb-lite	consensus disorder prediction	1	16	-	29-08-2024	-	-
Fxa7Dg102048.1	02d83cd2317eb476dca495d8a9f910d8	186	MobiDBLite	mobidb-lite	consensus disorder prediction	145	162	-	29-08-2024	-	-
Fxa7Dg102048.1	02d83cd2317eb476dca495d8a9f910d8	186	MobiDBLite	mobidb-lite	consensus disorder prediction	17	38	-	29-08-2024	-	-
Fxa1Dg201455.1	4742d02eabef8e7daa826b715e212c8c	399	MobiDBLite	mobidb-lite	consensus disorder prediction	203	273	-	29-08-2024	-	-
Fxa1Dg201455.1	4742d02eabef8e7daa826b715e212c8c	399	Pfam	PF00332	Glycosyl hydrolases family 17	33	162	3.9e-07	29-08-2024	IPR000490	Glycoside hydrolase family 17
Fxa1Dg201455.1	4742d02eabef8e7daa826b715e212c8c	399	Phobius	SIGNAL_PEPTIDE_H_REGION	Hydrophobic region of a signal peptide.	5	17	-	29-08-2024	-	-
Fxa1Dg201455.1	4742d02eabef8e7daa826b715e212c8c	399	Phobius	NON_CYTOPLASMIC_DOMAIN	Region of a membrane-bound protein predicted to be outside the membrane, in the extracellular region.	26	399	-	29-08-2024	-	-
Fxa1Dg201455.1	4742d02eabef8e7daa826b715e212c8c	399	Pfam	PF07983	X8 domain	312	384	6.7e-20	29-08-2024	IPR012946	X8 domain
Fxa1Dg201455.1	4742d02eabef8e7daa826b715e212c8c	399	Phobius	SIGNAL_PEPTIDE	Signal peptide region	1	25	-	29-08-2024	-	-
Fxa1Dg201455.1	4742d02eabef8e7daa826b715e212c8c	399	Phobius	SIGNAL_PEPTIDE_N_REGION	N-terminal region of a signal peptide.	1	4	-	29-08-2024	-	-
Fxa1Dg201455.1	4742d02eabef8e7daa826b715e212c8c	399	Phobius	SIGNAL_PEPTIDE_C_REGION	C-terminal region of a signal peptide.	18	25	-	29-08-2024	-	-
Fxa1Dg201455.1	4742d02eabef8e7daa826b715e212c8c	399	MobiDBLite	mobidb-lite	consensus disorder prediction	225	257	-	29-08-2024	-	-
Fxa3Ag100021.1	060f0cfa988442874c83333f20bff68a	499	Phobius	CYTOPLASMIC_DOMAIN	Region of a membrane-bound protein predicted to be outside the membrane, in the cytoplasm.	499	499	-	29-08-2024	-	-
Fxa3Ag100021.1	060f0cfa988442874c83333f20bff68a	499	Phobius	SIGNAL_PEPTIDE_N_REGION	N-terminal region of a signal peptide.	1	22	-	29-08-2024	-	-
Fxa3Ag100021.1	060f0cfa988442874c83333f20bff68a	499	Phobius	NON_CYTOPLASMIC_DOMAIN	Region of a membrane-bound protein predicted to be outside the membrane, in the extracellular region.	41	481	-	29-08-2024	-	-
Fxa3Ag100021.1	060f0cfa988442874c83333f20bff68a	499	Phobius	SIGNAL_PEPTIDE	Signal peptide region	1	40	-	29-08-2024	-	-
Fxa3Ag100021.1	060f0cfa988442874c83333f20bff68a	499	Pfam	PF07983	X8 domain	381	449	4.2e-13	29-08-2024	IPR012946	X8 domain
Fxa3Ag100021.1	060f0cfa988442874c83333f20bff68a	499	Phobius	TRANSMEMBRANE	Region of a membrane-bound protein predicted to be embedded in the membrane.	482	498	-	29-08-2024	-	-
Fxa3Ag100021.1	060f0cfa988442874c83333f20bff68a	499	Pfam	PF00332	Glycosyl hydrolases family 17	42	360	7.5e-58	29-08-2024	IPR000490	Glycoside hydrolase family 17
Fxa3Ag100021.1	060f0cfa988442874c83333f20bff68a	499	Phobius	SIGNAL_PEPTIDE_H_REGION	Hydrophobic region of a signal peptide.	23	34	-	29-08-2024	-	-
Fxa3Ag100021.1	060f0cfa988442874c83333f20bff68a	499	Phobius	SIGNAL_PEPTIDE_C_REGION	C-terminal region of a signal peptide.	35	40	-	29-08-2024	-	-
Fxa4Cg202511.1	ed84cb64284827ff273b22eae6921741	425	Phobius	SIGNAL_PEPTIDE_C_REGION	C-terminal region of a signal peptide.	19	26	-	29-08-2024	-	-
Fxa4Cg202511.1	ed84cb64284827ff273b22eae6921741	425	Phobius	SIGNAL_PEPTIDE_N_REGION	N-terminal region of a signal peptide.	1	6	-	29-08-2024	-	-
Fxa4Cg202511.1	ed84cb64284827ff273b22eae6921741	425	Phobius	NON_CYTOPLASMIC_DOMAIN	Region of a membrane-bound protein predicted to be outside the membrane, in the extracellular region.	27	425	-	29-08-2024	-	-
Fxa4Cg202511.1	ed84cb64284827ff273b22eae6921741	425	Phobius	SIGNAL_PEPTIDE	Signal peptide region	1	26	-	29-08-2024	-	-
Fxa4Cg202511.1	ed84cb64284827ff273b22eae6921741	425	Phobius	SIGNAL_PEPTIDE_H_REGION	Hydrophobic region of a signal peptide.	7	18	-	29-08-2024	-	-
Fxa4Cg202511.1	ed84cb64284827ff273b22eae6921741	425	MobiDBLite	mobidb-lite	consensus disorder prediction	349	406	-	29-08-2024	-	-
Fxa4Cg202511.1	ed84cb64284827ff273b22eae6921741	425	MobiDBLite	mobidb-lite	consensus disorder prediction	364	406	-	29-08-2024	-	-
Fxa4Cg202511.1	ed84cb64284827ff273b22eae6921741	425	Pfam	PF00332	Glycosyl hydrolases family 17	27	341	1.9e-75	29-08-2024	IPR000490	Glycoside hydrolase family 17
Fxa7Dg101925.1	c5239c0f4cd9b3df63fd7ad9435ac411	498	Phobius	SIGNAL_PEPTIDE_H_REGION	Hydrophobic region of a signal peptide.	28	38	-	29-08-2024	-	-
Fxa7Dg101925.1	c5239c0f4cd9b3df63fd7ad9435ac411	498	Phobius	SIGNAL_PEPTIDE_C_REGION	C-terminal region of a signal peptide.	39	43	-	29-08-2024	-	-
Fxa7Dg101925.1	c5239c0f4cd9b3df63fd7ad9435ac411	498	MobiDBLite	mobidb-lite	consensus disorder prediction	377	403	-	29-08-2024	-	-
Fxa7Dg101925.1	c5239c0f4cd9b3df63fd7ad9435ac411	498	Phobius	NON_CYTOPLASMIC_DOMAIN	Region of a membrane-bound protein predicted to be outside the membrane, in the extracellular region.	44	498	-	29-08-2024	-	-
Fxa7Dg101925.1	c5239c0f4cd9b3df63fd7ad9435ac411	498	Pfam	PF00332	Glycosyl hydrolases family 17	44	353	3.7e-71	29-08-2024	IPR000490	Glycoside hydrolase family 17
Fxa7Dg101925.1	c5239c0f4cd9b3df63fd7ad9435ac411	498	Phobius	SIGNAL_PEPTIDE_N_REGION	N-terminal region of a signal peptide.	1	27	-	29-08-2024	-	-
Fxa7Dg101925.1	c5239c0f4cd9b3df63fd7ad9435ac411	498	Phobius	SIGNAL_PEPTIDE	Signal peptide region	1	43	-	29-08-2024	-	-
Fxa7Dg101925.1	c5239c0f4cd9b3df63fd7ad9435ac411	498	Pfam	PF07983	X8 domain	413	482	7.8e-17	29-08-2024	IPR012946	X8 domain
Fxa7Bg202988.1	d0293bd86323e1481775c386051b64f7	758	Pfam	PF00332	Glycosyl hydrolases family 17	329	643	6.8e-75	29-08-2024	IPR000490	Glycoside hydrolase family 17
Fxa7Bg202988.1	d0293bd86323e1481775c386051b64f7	758	Pfam	PF00112	Papain family cysteine protease	116	320	4e-52	29-08-2024	IPR000668	Peptidase C1A, papain C-terminal
Fxa7Bg202988.1	d0293bd86323e1481775c386051b64f7	758	Pfam	PF07983	X8 domain	675	744	6e-15	29-08-2024	IPR012946	X8 domain
Fxa1Cg101560.1	740e317df13e529d0686a05688759e6b	399	Phobius	SIGNAL_PEPTIDE_H_REGION	Hydrophobic region of a signal peptide.	5	17	-	29-08-2024	-	-
Fxa1Cg101560.1	740e317df13e529d0686a05688759e6b	399	Pfam	PF00332	Glycosyl hydrolases family 17	34	162	8.8e-07	29-08-2024	IPR000490	Glycoside hydrolase family 17
Fxa1Cg101560.1	740e317df13e529d0686a05688759e6b	399	Phobius	NON_CYTOPLASMIC_DOMAIN	Region of a membrane-bound protein predicted to be outside the membrane, in the extracellular region.	26	399	-	29-08-2024	-	-
Fxa1Cg101560.1	740e317df13e529d0686a05688759e6b	399	MobiDBLite	mobidb-lite	consensus disorder prediction	203	274	-	29-08-2024	-	-
Fxa1Cg101560.1	740e317df13e529d0686a05688759e6b	399	Pfam	PF07983	X8 domain	312	384	6.7e-20	29-08-2024	IPR012946	X8 domain
Fxa1Cg101560.1	740e317df13e529d0686a05688759e6b	399	Phobius	SIGNAL_PEPTIDE	Signal peptide region	1	25	-	29-08-2024	-	-
Fxa1Cg101560.1	740e317df13e529d0686a05688759e6b	399	Phobius	SIGNAL_PEPTIDE_N_REGION	N-terminal region of a signal peptide.	1	4	-	29-08-2024	-	-
Fxa1Cg101560.1	740e317df13e529d0686a05688759e6b	399	Phobius	SIGNAL_PEPTIDE_C_REGION	C-terminal region of a signal peptide.	18	25	-	29-08-2024	-	-
Fxa1Cg101560.1	740e317df13e529d0686a05688759e6b	399	MobiDBLite	mobidb-lite	consensus disorder prediction	225	257	-	29-08-2024	-	-
Fxa2Ag103885.1	6f7f5b0a387ebf312682df104a0a3093	488	Phobius	NON_CYTOPLASMIC_DOMAIN	Region of a membrane-bound protein predicted to be outside the membrane, in the extracellular region.	23	488	-	29-08-2024	-	-
Fxa2Ag103885.1	6f7f5b0a387ebf312682df104a0a3093	488	Phobius	SIGNAL_PEPTIDE_C_REGION	C-terminal region of a signal peptide.	15	22	-	29-08-2024	-	-
Fxa2Ag103885.1	6f7f5b0a387ebf312682df104a0a3093	488	MobiDBLite	mobidb-lite	consensus disorder prediction	348	384	-	29-08-2024	-	-
Fxa2Ag103885.1	6f7f5b0a387ebf312682df104a0a3093	488	Pfam	PF07983	X8 domain	392	462	5.3e-17	29-08-2024	IPR012946	X8 domain
Fxa2Ag103885.1	6f7f5b0a387ebf312682df104a0a3093	488	Pfam	PF00332	Glycosyl hydrolases family 17	26	343	8.5e-77	29-08-2024	IPR000490	Glycoside hydrolase family 17
Fxa2Ag103885.1	6f7f5b0a387ebf312682df104a0a3093	488	Phobius	SIGNAL_PEPTIDE_N_REGION	N-terminal region of a signal peptide.	1	2	-	29-08-2024	-	-
Fxa2Ag103885.1	6f7f5b0a387ebf312682df104a0a3093	488	MobiDBLite	mobidb-lite	consensus disorder prediction	358	382	-	29-08-2024	-	-
Fxa2Ag103885.1	6f7f5b0a387ebf312682df104a0a3093	488	Phobius	SIGNAL_PEPTIDE_H_REGION	Hydrophobic region of a signal peptide.	3	14	-	29-08-2024	-	-
Fxa2Ag103885.1	6f7f5b0a387ebf312682df104a0a3093	488	Phobius	SIGNAL_PEPTIDE	Signal peptide region	1	22	-	29-08-2024	-	-
Fxa3Cg103766.1	638729bfdb3b80854e13997165c43a06	798	Pfam	PF00332	Glycosyl hydrolases family 17	330	649	6.8e-69	29-08-2024	IPR000490	Glycoside hydrolase family 17
Fxa3Cg103766.1	638729bfdb3b80854e13997165c43a06	798	Pfam	PF00076	RNA recognition motif	41	110	6.2e-14	29-08-2024	IPR000504	RNA recognition motif domain
Fxa3Cg103766.1	638729bfdb3b80854e13997165c43a06	798	Phobius	NON_CYTOPLASMIC_DOMAIN	Region of a membrane-bound protein predicted to be outside the membrane, in the extracellular region.	323	798	-	29-08-2024	-	-
Fxa3Cg103766.1	638729bfdb3b80854e13997165c43a06	798	MobiDBLite	mobidb-lite	consensus disorder prediction	165	185	-	29-08-2024	-	-
Fxa3Cg103766.1	638729bfdb3b80854e13997165c43a06	798	Phobius	TRANSMEMBRANE	Region of a membrane-bound protein predicted to be embedded in the membrane.	296	322	-	29-08-2024	-	-
Fxa3Cg103766.1	638729bfdb3b80854e13997165c43a06	798	MobiDBLite	mobidb-lite	consensus disorder prediction	193	238	-	29-08-2024	-	-
Fxa3Cg103766.1	638729bfdb3b80854e13997165c43a06	798	MobiDBLite	mobidb-lite	consensus disorder prediction	117	249	-	29-08-2024	-	-
Fxa3Cg103766.1	638729bfdb3b80854e13997165c43a06	798	MobiDBLite	mobidb-lite	consensus disorder prediction	117	146	-	29-08-2024	-	-
Fxa3Cg103766.1	638729bfdb3b80854e13997165c43a06	798	MobiDBLite	mobidb-lite	consensus disorder prediction	1	40	-	29-08-2024	-	-
Fxa3Cg103766.1	638729bfdb3b80854e13997165c43a06	798	Pfam	PF07983	X8 domain	664	734	5.2e-17	29-08-2024	IPR012946	X8 domain
Fxa3Cg103766.1	638729bfdb3b80854e13997165c43a06	798	Phobius	CYTOPLASMIC_DOMAIN	Region of a membrane-bound protein predicted to be outside the membrane, in the cytoplasm.	1	295	-	29-08-2024	-	-
Fxa4Cg200004.1	884524d6533701313799080efad1b836	531	Phobius	CYTOPLASMIC_DOMAIN	Region of a membrane-bound protein predicted to be outside the membrane, in the cytoplasm.	39	49	-	29-08-2024	-	-
Fxa4Cg200004.1	884524d6533701313799080efad1b836	531	Pfam	PF07983	X8 domain	409	478	5.3e-11	29-08-2024	IPR012946	X8 domain
Fxa4Cg200004.1	884524d6533701313799080efad1b836	531	Phobius	TRANSMEMBRANE	Region of a membrane-bound protein predicted to be embedded in the membrane.	20	38	-	29-08-2024	-	-
Fxa4Cg200004.1	884524d6533701313799080efad1b836	531	Phobius	TRANSMEMBRANE	Region of a membrane-bound protein predicted to be embedded in the membrane.	50	74	-	29-08-2024	-	-
Fxa4Cg200004.1	884524d6533701313799080efad1b836	531	Phobius	NON_CYTOPLASMIC_DOMAIN	Region of a membrane-bound protein predicted to be outside the membrane, in the extracellular region.	75	531	-	29-08-2024	-	-
Fxa4Cg200004.1	884524d6533701313799080efad1b836	531	Pfam	PF00332	Glycosyl hydrolases family 17	70	388	4.3e-63	29-08-2024	IPR000490	Glycoside hydrolase family 17
Fxa4Cg200004.1	884524d6533701313799080efad1b836	531	Phobius	NON_CYTOPLASMIC_DOMAIN	Region of a membrane-bound protein predicted to be outside the membrane, in the extracellular region.	1	19	-	29-08-2024	-	-
Fxa3Cg102100.1	f39dccecd88fcf438d47a6443439a727	408	Phobius	NON_CYTOPLASMIC_DOMAIN	Region of a membrane-bound protein predicted to be outside the membrane, in the extracellular region.	23	408	-	29-08-2024	-	-
Fxa3Cg102100.1	f39dccecd88fcf438d47a6443439a727	408	Phobius	SIGNAL_PEPTIDE_H_REGION	Hydrophobic region of a signal peptide.	7	17	-	29-08-2024	-	-
Fxa3Cg102100.1	f39dccecd88fcf438d47a6443439a727	408	Pfam	PF00332	Glycosyl hydrolases family 17	33	348	1.1e-85	29-08-2024	IPR000490	Glycoside hydrolase family 17
Fxa3Cg102100.1	f39dccecd88fcf438d47a6443439a727	408	Phobius	SIGNAL_PEPTIDE_N_REGION	N-terminal region of a signal peptide.	1	6	-	29-08-2024	-	-
Fxa3Cg102100.1	f39dccecd88fcf438d47a6443439a727	408	Phobius	SIGNAL_PEPTIDE_C_REGION	C-terminal region of a signal peptide.	18	22	-	29-08-2024	-	-
Fxa3Cg102100.1	f39dccecd88fcf438d47a6443439a727	408	Phobius	SIGNAL_PEPTIDE	Signal peptide region	1	22	-	29-08-2024	-	-
Fxa5Ag200561.1	c4cf8f8241d23268731f5d2f83d8e13a	661	MobiDBLite	mobidb-lite	consensus disorder prediction	541	567	-	29-08-2024	-	-
Fxa5Ag200561.1	c4cf8f8241d23268731f5d2f83d8e13a	661	Pfam	PF00332	Glycosyl hydrolases family 17	104	374	2.7e-76	29-08-2024	IPR000490	Glycoside hydrolase family 17
Fxa5Ag200561.1	c4cf8f8241d23268731f5d2f83d8e13a	661	Pfam	PF03398	Regulator of Vps4 activity in the MVB pathway	401	530	3.1e-15	29-08-2024	IPR005061	Vacuolar protein sorting-associated protein Ist1
Fxa7Bg200341.1	1d8e8d42aa8a6e6e69224043cfc4158b	338	Phobius	NON_CYTOPLASMIC_DOMAIN	Region of a membrane-bound protein predicted to be outside the membrane, in the extracellular region.	27	338	-	29-08-2024	-	-
Fxa7Bg200341.1	1d8e8d42aa8a6e6e69224043cfc4158b	338	Phobius	SIGNAL_PEPTIDE	Signal peptide region	1	26	-	29-08-2024	-	-
Fxa7Bg200341.1	1d8e8d42aa8a6e6e69224043cfc4158b	338	Phobius	SIGNAL_PEPTIDE_H_REGION	Hydrophobic region of a signal peptide.	3	14	-	29-08-2024	-	-
Fxa7Bg200341.1	1d8e8d42aa8a6e6e69224043cfc4158b	338	Pfam	PF00332	Glycosyl hydrolases family 17	29	336	1.6e-85	29-08-2024	IPR000490	Glycoside hydrolase family 17
Fxa7Bg200341.1	1d8e8d42aa8a6e6e69224043cfc4158b	338	Phobius	SIGNAL_PEPTIDE_N_REGION	N-terminal region of a signal peptide.	1	2	-	29-08-2024	-	-
Fxa7Bg200341.1	1d8e8d42aa8a6e6e69224043cfc4158b	338	Phobius	SIGNAL_PEPTIDE_C_REGION	C-terminal region of a signal peptide.	15	26	-	29-08-2024	-	-
Fxa1Bg200470.1	8d864de722f1f8430ed8d6b680224d8b	521	Phobius	NON_CYTOPLASMIC_DOMAIN	Region of a membrane-bound protein predicted to be outside the membrane, in the extracellular region.	32	521	-	29-08-2024	-	-
Fxa1Bg200470.1	8d864de722f1f8430ed8d6b680224d8b	521	Pfam	PF07983	X8 domain	373	441	1.3e-11	29-08-2024	IPR012946	X8 domain
Fxa1Bg200470.1	8d864de722f1f8430ed8d6b680224d8b	521	Phobius	SIGNAL_PEPTIDE_H_REGION	Hydrophobic region of a signal peptide.	12	23	-	29-08-2024	-	-
Fxa1Bg200470.1	8d864de722f1f8430ed8d6b680224d8b	521	Pfam	PF00332	Glycosyl hydrolases family 17	31	350	3.7e-56	29-08-2024	IPR000490	Glycoside hydrolase family 17
Fxa1Bg200470.1	8d864de722f1f8430ed8d6b680224d8b	521	Phobius	SIGNAL_PEPTIDE	Signal peptide region	1	31	-	29-08-2024	-	-
Fxa1Bg200470.1	8d864de722f1f8430ed8d6b680224d8b	521	Phobius	SIGNAL_PEPTIDE_C_REGION	C-terminal region of a signal peptide.	24	31	-	29-08-2024	-	-
Fxa1Bg200470.1	8d864de722f1f8430ed8d6b680224d8b	521	Phobius	SIGNAL_PEPTIDE_N_REGION	N-terminal region of a signal peptide.	1	11	-	29-08-2024	-	-
Fxa3Ag103398.1	d6122e936b708b7e97e96057a2b55b49	535	Pfam	PF00332	Glycosyl hydrolases family 17	48	361	8.1e-76	29-08-2024	IPR000490	Glycoside hydrolase family 17
Fxa3Ag103398.1	d6122e936b708b7e97e96057a2b55b49	535	Phobius	CYTOPLASMIC_DOMAIN	Region of a membrane-bound protein predicted to be outside the membrane, in the cytoplasm.	1	29	-	29-08-2024	-	-
Fxa3Ag103398.1	d6122e936b708b7e97e96057a2b55b49	535	Phobius	NON_CYTOPLASMIC_DOMAIN	Region of a membrane-bound protein predicted to be outside the membrane, in the extracellular region.	53	535	-	29-08-2024	-	-
Fxa3Ag103398.1	d6122e936b708b7e97e96057a2b55b49	535	Pfam	PF07983	X8 domain	404	474	9.5e-20	29-08-2024	IPR012946	X8 domain
Fxa3Ag103398.1	d6122e936b708b7e97e96057a2b55b49	535	Phobius	TRANSMEMBRANE	Region of a membrane-bound protein predicted to be embedded in the membrane.	30	52	-	29-08-2024	-	-
Fxa3Ag103398.1	d6122e936b708b7e97e96057a2b55b49	535	MobiDBLite	mobidb-lite	consensus disorder prediction	363	390	-	29-08-2024	-	-
Fxa5Dg200825.1	1f9fbbc6d8623588cf083618b5d7664a	414	Phobius	NON_CYTOPLASMIC_DOMAIN	Region of a membrane-bound protein predicted to be outside the membrane, in the extracellular region.	29	414	-	29-08-2024	-	-
Fxa5Dg200825.1	1f9fbbc6d8623588cf083618b5d7664a	414	Phobius	SIGNAL_PEPTIDE	Signal peptide region	1	28	-	29-08-2024	-	-
Fxa5Dg200825.1	1f9fbbc6d8623588cf083618b5d7664a	414	Phobius	SIGNAL_PEPTIDE_C_REGION	C-terminal region of a signal peptide.	22	28	-	29-08-2024	-	-
Fxa5Dg200825.1	1f9fbbc6d8623588cf083618b5d7664a	414	MobiDBLite	mobidb-lite	consensus disorder prediction	354	390	-	29-08-2024	-	-
Fxa5Dg200825.1	1f9fbbc6d8623588cf083618b5d7664a	414	Phobius	SIGNAL_PEPTIDE_H_REGION	Hydrophobic region of a signal peptide.	10	21	-	29-08-2024	-	-
Fxa5Dg200825.1	1f9fbbc6d8623588cf083618b5d7664a	414	Pfam	PF00332	Glycosyl hydrolases family 17	29	347	3e-82	29-08-2024	IPR000490	Glycoside hydrolase family 17
Fxa5Dg200825.1	1f9fbbc6d8623588cf083618b5d7664a	414	Phobius	SIGNAL_PEPTIDE_N_REGION	N-terminal region of a signal peptide.	1	9	-	29-08-2024	-	-
Fxa1Ag100760.1	ab1d7f63e1532a00a07ee9928c924d54	619	Phobius	SIGNAL_PEPTIDE	Signal peptide region	1	26	-	29-08-2024	-	-
Fxa1Ag100760.1	ab1d7f63e1532a00a07ee9928c924d54	619	Phobius	SIGNAL_PEPTIDE_H_REGION	Hydrophobic region of a signal peptide.	3	14	-	29-08-2024	-	-
Fxa1Ag100760.1	ab1d7f63e1532a00a07ee9928c924d54	619	Phobius	NON_CYTOPLASMIC_DOMAIN	Region of a membrane-bound protein predicted to be outside the membrane, in the extracellular region.	27	619	-	29-08-2024	-	-
Fxa1Ag100760.1	ab1d7f63e1532a00a07ee9928c924d54	619	Pfam	PF00332	Glycosyl hydrolases family 17	29	333	1.7e-84	29-08-2024	IPR000490	Glycoside hydrolase family 17
Fxa1Ag100760.1	ab1d7f63e1532a00a07ee9928c924d54	619	Pfam	PF00332	Glycosyl hydrolases family 17	358	493	1.2e-14	29-08-2024	IPR000490	Glycoside hydrolase family 17
Fxa1Ag100760.1	ab1d7f63e1532a00a07ee9928c924d54	619	Phobius	SIGNAL_PEPTIDE_N_REGION	N-terminal region of a signal peptide.	1	2	-	29-08-2024	-	-
Fxa1Ag100760.1	ab1d7f63e1532a00a07ee9928c924d54	619	Phobius	SIGNAL_PEPTIDE_C_REGION	C-terminal region of a signal peptide.	15	26	-	29-08-2024	-	-
Fxa2Bg200710.1	e93edd5d738877e1ef77bb119ebb1500	515	Pfam	PF07983	X8 domain	380	452	3.5e-16	29-08-2024	IPR012946	X8 domain
Fxa2Bg200710.1	e93edd5d738877e1ef77bb119ebb1500	515	MobiDBLite	mobidb-lite	consensus disorder prediction	355	382	-	29-08-2024	-	-
Fxa2Bg200710.1	e93edd5d738877e1ef77bb119ebb1500	515	Pfam	PF00332	Glycosyl hydrolases family 17	38	354	7.1e-76	29-08-2024	IPR000490	Glycoside hydrolase family 17
Fxa3Ag102226.1	5fc77a15846fef5d1024d9b7cb4ab831	473	Pfam	PF07983	X8 domain	375	446	7.8e-20	29-08-2024	IPR012946	X8 domain
Fxa3Ag102226.1	5fc77a15846fef5d1024d9b7cb4ab831	473	Phobius	NON_CYTOPLASMIC_DOMAIN	Region of a membrane-bound protein predicted to be outside the membrane, in the extracellular region.	23	473	-	29-08-2024	-	-
Fxa3Ag102226.1	5fc77a15846fef5d1024d9b7cb4ab831	473	Pfam	PF00332	Glycosyl hydrolases family 17	28	345	4.4e-90	29-08-2024	IPR000490	Glycoside hydrolase family 17
Fxa3Ag102226.1	5fc77a15846fef5d1024d9b7cb4ab831	473	Phobius	SIGNAL_PEPTIDE_H_REGION	Hydrophobic region of a signal peptide.	6	17	-	29-08-2024	-	-
Fxa3Ag102226.1	5fc77a15846fef5d1024d9b7cb4ab831	473	Phobius	SIGNAL_PEPTIDE_C_REGION	C-terminal region of a signal peptide.	18	22	-	29-08-2024	-	-
Fxa3Ag102226.1	5fc77a15846fef5d1024d9b7cb4ab831	473	Phobius	SIGNAL_PEPTIDE_N_REGION	N-terminal region of a signal peptide.	1	5	-	29-08-2024	-	-
Fxa3Ag102226.1	5fc77a15846fef5d1024d9b7cb4ab831	473	Phobius	SIGNAL_PEPTIDE	Signal peptide region	1	22	-	29-08-2024	-	-
Fxa3Cg100463.1	fb3fa235195e7c59dd27845d3e0d5c0c	407	Phobius	SIGNAL_PEPTIDE	Signal peptide region	1	28	-	29-08-2024	-	-
Fxa3Cg100463.1	fb3fa235195e7c59dd27845d3e0d5c0c	407	Phobius	NON_CYTOPLASMIC_DOMAIN	Region of a membrane-bound protein predicted to be outside the membrane, in the extracellular region.	29	383	-	29-08-2024	-	-
Fxa3Cg100463.1	fb3fa235195e7c59dd27845d3e0d5c0c	407	Phobius	SIGNAL_PEPTIDE_H_REGION	Hydrophobic region of a signal peptide.	12	23	-	29-08-2024	-	-
Fxa3Cg100463.1	fb3fa235195e7c59dd27845d3e0d5c0c	407	Phobius	TRANSMEMBRANE	Region of a membrane-bound protein predicted to be embedded in the membrane.	384	403	-	29-08-2024	-	-
Fxa3Cg100463.1	fb3fa235195e7c59dd27845d3e0d5c0c	407	Pfam	PF00332	Glycosyl hydrolases family 17	29	346	2.7e-76	29-08-2024	IPR000490	Glycoside hydrolase family 17
Fxa3Cg100463.1	fb3fa235195e7c59dd27845d3e0d5c0c	407	Phobius	SIGNAL_PEPTIDE_C_REGION	C-terminal region of a signal peptide.	24	28	-	29-08-2024	-	-
Fxa3Cg100463.1	fb3fa235195e7c59dd27845d3e0d5c0c	407	Phobius	SIGNAL_PEPTIDE_N_REGION	N-terminal region of a signal peptide.	1	11	-	29-08-2024	-	-
Fxa3Cg100463.1	fb3fa235195e7c59dd27845d3e0d5c0c	407	Phobius	CYTOPLASMIC_DOMAIN	Region of a membrane-bound protein predicted to be outside the membrane, in the cytoplasm.	404	407	-	29-08-2024	-	-
Fxa2Bg201692.1	806159bc56c8626313b77196a8e151a7	453	Phobius	SIGNAL_PEPTIDE_H_REGION	Hydrophobic region of a signal peptide.	3	15	-	29-08-2024	-	-
Fxa2Bg201692.1	806159bc56c8626313b77196a8e151a7	453	Phobius	SIGNAL_PEPTIDE_N_REGION	N-terminal region of a signal peptide.	1	2	-	29-08-2024	-	-
Fxa2Bg201692.1	806159bc56c8626313b77196a8e151a7	453	Pfam	PF07983	X8 domain	374	444	6.8e-16	29-08-2024	IPR012946	X8 domain
Fxa2Bg201692.1	806159bc56c8626313b77196a8e151a7	453	Phobius	SIGNAL_PEPTIDE	Signal peptide region	1	20	-	29-08-2024	-	-
Fxa2Bg201692.1	806159bc56c8626313b77196a8e151a7	453	Pfam	PF00332	Glycosyl hydrolases family 17	26	347	7.9e-95	29-08-2024	IPR000490	Glycoside hydrolase family 17
Fxa2Bg201692.1	806159bc56c8626313b77196a8e151a7	453	Phobius	SIGNAL_PEPTIDE_C_REGION	C-terminal region of a signal peptide.	16	20	-	29-08-2024	-	-
Fxa2Bg201692.1	806159bc56c8626313b77196a8e151a7	453	Phobius	NON_CYTOPLASMIC_DOMAIN	Region of a membrane-bound protein predicted to be outside the membrane, in the extracellular region.	21	453	-	29-08-2024	-	-
Fxa4Dg102676.1	51d427d35364439b98c3803614d405c4	138	Pfam	PF00332	Glycosyl hydrolases family 17	1	137	8.9e-34	29-08-2024	IPR000490	Glycoside hydrolase family 17
Fxa3Dg200018.1	fef6efef6d1ab8f42ae4de1e51d9e2c7	500	Phobius	SIGNAL_PEPTIDE_N_REGION	N-terminal region of a signal peptide.	1	23	-	29-08-2024	-	-
Fxa3Dg200018.1	fef6efef6d1ab8f42ae4de1e51d9e2c7	500	Phobius	NON_CYTOPLASMIC_DOMAIN	Region of a membrane-bound protein predicted to be outside the membrane, in the extracellular region.	42	500	-	29-08-2024	-	-
Fxa3Dg200018.1	fef6efef6d1ab8f42ae4de1e51d9e2c7	500	Pfam	PF07983	X8 domain	382	450	4.2e-13	29-08-2024	IPR012946	X8 domain
Fxa3Dg200018.1	fef6efef6d1ab8f42ae4de1e51d9e2c7	500	Phobius	SIGNAL_PEPTIDE_H_REGION	Hydrophobic region of a signal peptide.	24	35	-	29-08-2024	-	-
Fxa3Dg200018.1	fef6efef6d1ab8f42ae4de1e51d9e2c7	500	Phobius	SIGNAL_PEPTIDE_C_REGION	C-terminal region of a signal peptide.	36	41	-	29-08-2024	-	-
Fxa3Dg200018.1	fef6efef6d1ab8f42ae4de1e51d9e2c7	500	Phobius	SIGNAL_PEPTIDE	Signal peptide region	1	41	-	29-08-2024	-	-
Fxa3Dg200018.1	fef6efef6d1ab8f42ae4de1e51d9e2c7	500	Pfam	PF00332	Glycosyl hydrolases family 17	43	361	2.4e-58	29-08-2024	IPR000490	Glycoside hydrolase family 17
Fxa1Ag102683.1	8cd2e2be0d8594518bf8181bcdcf3c43	504	Pfam	PF07983	X8 domain	369	439	5.9e-15	29-08-2024	IPR012946	X8 domain
Fxa1Ag102683.1	8cd2e2be0d8594518bf8181bcdcf3c43	504	Phobius	NON_CYTOPLASMIC_DOMAIN	Region of a membrane-bound protein predicted to be outside the membrane, in the extracellular region.	27	504	-	29-08-2024	-	-
Fxa1Ag102683.1	8cd2e2be0d8594518bf8181bcdcf3c43	504	Phobius	SIGNAL_PEPTIDE_H_REGION	Hydrophobic region of a signal peptide.	11	21	-	29-08-2024	-	-
Fxa1Ag102683.1	8cd2e2be0d8594518bf8181bcdcf3c43	504	Pfam	PF00332	Glycosyl hydrolases family 17	32	351	4.1e-76	29-08-2024	IPR000490	Glycoside hydrolase family 17
Fxa1Ag102683.1	8cd2e2be0d8594518bf8181bcdcf3c43	504	Phobius	SIGNAL_PEPTIDE	Signal peptide region	1	26	-	29-08-2024	-	-
Fxa1Ag102683.1	8cd2e2be0d8594518bf8181bcdcf3c43	504	Phobius	SIGNAL_PEPTIDE_C_REGION	C-terminal region of a signal peptide.	22	26	-	29-08-2024	-	-
Fxa1Ag102683.1	8cd2e2be0d8594518bf8181bcdcf3c43	504	Phobius	SIGNAL_PEPTIDE_N_REGION	N-terminal region of a signal peptide.	1	10	-	29-08-2024	-	-
Fxa2Cg202662.1	62f5e3bcc2dda26b28aff7c887780da7	302	Phobius	NON_CYTOPLASMIC_DOMAIN	Region of a membrane-bound protein predicted to be outside the membrane, in the extracellular region.	21	302	-	29-08-2024	-	-
Fxa2Cg202662.1	62f5e3bcc2dda26b28aff7c887780da7	302	Phobius	SIGNAL_PEPTIDE	Signal peptide region	1	20	-	29-08-2024	-	-
Fxa2Cg202662.1	62f5e3bcc2dda26b28aff7c887780da7	302	Pfam	PF00332	Glycosyl hydrolases family 17	26	212	4e-40	29-08-2024	IPR000490	Glycoside hydrolase family 17
Fxa2Cg202662.1	62f5e3bcc2dda26b28aff7c887780da7	302	Phobius	SIGNAL_PEPTIDE_H_REGION	Hydrophobic region of a signal peptide.	3	15	-	29-08-2024	-	-
Fxa2Cg202662.1	62f5e3bcc2dda26b28aff7c887780da7	302	Phobius	SIGNAL_PEPTIDE_C_REGION	C-terminal region of a signal peptide.	16	20	-	29-08-2024	-	-
Fxa2Cg202662.1	62f5e3bcc2dda26b28aff7c887780da7	302	Phobius	SIGNAL_PEPTIDE_N_REGION	N-terminal region of a signal peptide.	1	2	-	29-08-2024	-	-
Fxa6Cg102087.1	0bb70960f39e9943fa0c9ca2f3910ce3	165	Phobius	SIGNAL_PEPTIDE	Signal peptide region	1	33	-	29-08-2024	-	-
Fxa6Cg102087.1	0bb70960f39e9943fa0c9ca2f3910ce3	165	Phobius	SIGNAL_PEPTIDE_C_REGION	C-terminal region of a signal peptide.	29	33	-	29-08-2024	-	-
Fxa6Cg102087.1	0bb70960f39e9943fa0c9ca2f3910ce3	165	Phobius	SIGNAL_PEPTIDE_H_REGION	Hydrophobic region of a signal peptide.	17	28	-	29-08-2024	-	-
Fxa6Cg102087.1	0bb70960f39e9943fa0c9ca2f3910ce3	165	Phobius	SIGNAL_PEPTIDE_N_REGION	N-terminal region of a signal peptide.	1	16	-	29-08-2024	-	-
Fxa6Cg102087.1	0bb70960f39e9943fa0c9ca2f3910ce3	165	Pfam	PF00332	Glycosyl hydrolases family 17	35	158	1.6e-33	29-08-2024	IPR000490	Glycoside hydrolase family 17
Fxa6Cg102087.1	0bb70960f39e9943fa0c9ca2f3910ce3	165	Phobius	NON_CYTOPLASMIC_DOMAIN	Region of a membrane-bound protein predicted to be outside the membrane, in the extracellular region.	34	165	-	29-08-2024	-	-
Fxa1Cg102103.1	f65edd55dfba0014062bee4811c66c41	494	Phobius	SIGNAL_PEPTIDE	Signal peptide region	1	23	-	29-08-2024	-	-
Fxa1Cg102103.1	f65edd55dfba0014062bee4811c66c41	494	Phobius	CYTOPLASMIC_DOMAIN	Region of a membrane-bound protein predicted to be outside the membrane, in the cytoplasm.	483	494	-	29-08-2024	-	-
Fxa1Cg102103.1	f65edd55dfba0014062bee4811c66c41	494	Phobius	SIGNAL_PEPTIDE_H_REGION	Hydrophobic region of a signal peptide.	4	15	-	29-08-2024	-	-
Fxa1Cg102103.1	f65edd55dfba0014062bee4811c66c41	494	Phobius	SIGNAL_PEPTIDE_N_REGION	N-terminal region of a signal peptide.	1	3	-	29-08-2024	-	-
Fxa1Cg102103.1	f65edd55dfba0014062bee4811c66c41	494	Pfam	PF07983	X8 domain	366	436	1.6e-10	29-08-2024	IPR012946	X8 domain
Fxa1Cg102103.1	f65edd55dfba0014062bee4811c66c41	494	Pfam	PF00332	Glycosyl hydrolases family 17	25	344	5.4e-61	29-08-2024	IPR000490	Glycoside hydrolase family 17
Fxa1Cg102103.1	f65edd55dfba0014062bee4811c66c41	494	Phobius	SIGNAL_PEPTIDE_C_REGION	C-terminal region of a signal peptide.	16	23	-	29-08-2024	-	-
Fxa1Cg102103.1	f65edd55dfba0014062bee4811c66c41	494	Phobius	TRANSMEMBRANE	Region of a membrane-bound protein predicted to be embedded in the membrane.	460	482	-	29-08-2024	-	-
Fxa1Cg102103.1	f65edd55dfba0014062bee4811c66c41	494	Phobius	NON_CYTOPLASMIC_DOMAIN	Region of a membrane-bound protein predicted to be outside the membrane, in the extracellular region.	24	459	-	29-08-2024	-	-
Fxa1Dg202924.1	815c25cdca635f870e24d94551dc5f3a	533	Pfam	PF00332	Glycosyl hydrolases family 17	32	351	1.2e-75	29-08-2024	IPR000490	Glycoside hydrolase family 17
Fxa1Dg202924.1	815c25cdca635f870e24d94551dc5f3a	533	Phobius	SIGNAL_PEPTIDE_H_REGION	Hydrophobic region of a signal peptide.	11	21	-	29-08-2024	-	-
Fxa1Dg202924.1	815c25cdca635f870e24d94551dc5f3a	533	Phobius	SIGNAL_PEPTIDE_C_REGION	C-terminal region of a signal peptide.	22	26	-	29-08-2024	-	-
Fxa1Dg202924.1	815c25cdca635f870e24d94551dc5f3a	533	Phobius	SIGNAL_PEPTIDE	Signal peptide region	1	26	-	29-08-2024	-	-
Fxa1Dg202924.1	815c25cdca635f870e24d94551dc5f3a	533	Phobius	NON_CYTOPLASMIC_DOMAIN	Region of a membrane-bound protein predicted to be outside the membrane, in the extracellular region.	27	533	-	29-08-2024	-	-
Fxa1Dg202924.1	815c25cdca635f870e24d94551dc5f3a	533	Phobius	SIGNAL_PEPTIDE_N_REGION	N-terminal region of a signal peptide.	1	10	-	29-08-2024	-	-
Fxa1Dg202924.1	815c25cdca635f870e24d94551dc5f3a	533	Pfam	PF07983	X8 domain	369	439	6.4e-15	29-08-2024	IPR012946	X8 domain
Fxa3Bg200023.1	e9c3a3d7c2c7aeedaa0c065c66851f91	502	Phobius	SIGNAL_PEPTIDE_N_REGION	N-terminal region of a signal peptide.	1	23	-	29-08-2024	-	-
Fxa3Bg200023.1	e9c3a3d7c2c7aeedaa0c065c66851f91	502	Pfam	PF00332	Glycosyl hydrolases family 17	43	361	7e-57	29-08-2024	IPR000490	Glycoside hydrolase family 17
Fxa3Bg200023.1	e9c3a3d7c2c7aeedaa0c065c66851f91	502	Pfam	PF07983	X8 domain	382	450	5.3e-12	29-08-2024	IPR012946	X8 domain
Fxa3Bg200023.1	e9c3a3d7c2c7aeedaa0c065c66851f91	502	Phobius	SIGNAL_PEPTIDE_H_REGION	Hydrophobic region of a signal peptide.	24	35	-	29-08-2024	-	-
Fxa3Bg200023.1	e9c3a3d7c2c7aeedaa0c065c66851f91	502	Phobius	SIGNAL_PEPTIDE_C_REGION	C-terminal region of a signal peptide.	36	41	-	29-08-2024	-	-
Fxa3Bg200023.1	e9c3a3d7c2c7aeedaa0c065c66851f91	502	Phobius	SIGNAL_PEPTIDE	Signal peptide region	1	41	-	29-08-2024	-	-
Fxa3Bg200023.1	e9c3a3d7c2c7aeedaa0c065c66851f91	502	Phobius	CYTOPLASMIC_DOMAIN	Region of a membrane-bound protein predicted to be outside the membrane, in the cytoplasm.	502	502	-	29-08-2024	-	-
Fxa3Bg200023.1	e9c3a3d7c2c7aeedaa0c065c66851f91	502	Phobius	NON_CYTOPLASMIC_DOMAIN	Region of a membrane-bound protein predicted to be outside the membrane, in the extracellular region.	42	482	-	29-08-2024	-	-
Fxa3Bg200023.1	e9c3a3d7c2c7aeedaa0c065c66851f91	502	Phobius	TRANSMEMBRANE	Region of a membrane-bound protein predicted to be embedded in the membrane.	483	501	-	29-08-2024	-	-
Fxa2Cg201815.1	4a6a3be44d267796678b81c3fc513c2c	523	Phobius	SIGNAL_PEPTIDE	Signal peptide region	1	28	-	29-08-2024	-	-
Fxa2Cg201815.1	4a6a3be44d267796678b81c3fc513c2c	523	Phobius	SIGNAL_PEPTIDE_C_REGION	C-terminal region of a signal peptide.	22	28	-	29-08-2024	-	-
Fxa2Cg201815.1	4a6a3be44d267796678b81c3fc513c2c	523	Phobius	SIGNAL_PEPTIDE_H_REGION	Hydrophobic region of a signal peptide.	10	21	-	29-08-2024	-	-
Fxa2Cg201815.1	4a6a3be44d267796678b81c3fc513c2c	523	Pfam	PF00332	Glycosyl hydrolases family 17	30	362	4.4e-67	29-08-2024	IPR000490	Glycoside hydrolase family 17
Fxa2Cg201815.1	4a6a3be44d267796678b81c3fc513c2c	523	Phobius	NON_CYTOPLASMIC_DOMAIN	Region of a membrane-bound protein predicted to be outside the membrane, in the extracellular region.	29	523	-	29-08-2024	-	-
Fxa2Cg201815.1	4a6a3be44d267796678b81c3fc513c2c	523	MobiDBLite	mobidb-lite	consensus disorder prediction	363	390	-	29-08-2024	-	-
Fxa2Cg201815.1	4a6a3be44d267796678b81c3fc513c2c	523	Pfam	PF07983	X8 domain	388	460	1.2e-16	29-08-2024	IPR012946	X8 domain
Fxa2Cg201815.1	4a6a3be44d267796678b81c3fc513c2c	523	Phobius	SIGNAL_PEPTIDE_N_REGION	N-terminal region of a signal peptide.	1	9	-	29-08-2024	-	-
Fxa6Cg102532.1	fc7117bd3c967430f809164f53da2bf5	410	Phobius	NON_CYTOPLASMIC_DOMAIN	Region of a membrane-bound protein predicted to be outside the membrane, in the extracellular region.	46	410	-	29-08-2024	-	-
Fxa6Cg102532.1	fc7117bd3c967430f809164f53da2bf5	410	Phobius	SIGNAL_PEPTIDE_N_REGION	N-terminal region of a signal peptide.	1	15	-	29-08-2024	-	-
Fxa6Cg102532.1	fc7117bd3c967430f809164f53da2bf5	410	Phobius	SIGNAL_PEPTIDE_C_REGION	C-terminal region of a signal peptide.	28	45	-	29-08-2024	-	-
Fxa6Cg102532.1	fc7117bd3c967430f809164f53da2bf5	410	Pfam	PF00332	Glycosyl hydrolases family 17	45	363	6.8e-79	29-08-2024	IPR000490	Glycoside hydrolase family 17
Fxa6Cg102532.1	fc7117bd3c967430f809164f53da2bf5	410	Phobius	SIGNAL_PEPTIDE	Signal peptide region	1	45	-	29-08-2024	-	-
Fxa6Cg102532.1	fc7117bd3c967430f809164f53da2bf5	410	Phobius	SIGNAL_PEPTIDE_H_REGION	Hydrophobic region of a signal peptide.	16	27	-	29-08-2024	-	-
Fxa7Ag202220.1	4869ee4256c532698a7cfa5e3c816588	498	Phobius	SIGNAL_PEPTIDE_H_REGION	Hydrophobic region of a signal peptide.	28	38	-	29-08-2024	-	-
Fxa7Ag202220.1	4869ee4256c532698a7cfa5e3c816588	498	Phobius	SIGNAL_PEPTIDE_C_REGION	C-terminal region of a signal peptide.	39	43	-	29-08-2024	-	-
Fxa7Ag202220.1	4869ee4256c532698a7cfa5e3c816588	498	Pfam	PF07983	X8 domain	413	482	5.6e-17	29-08-2024	IPR012946	X8 domain
Fxa7Ag202220.1	4869ee4256c532698a7cfa5e3c816588	498	Phobius	NON_CYTOPLASMIC_DOMAIN	Region of a membrane-bound protein predicted to be outside the membrane, in the extracellular region.	44	498	-	29-08-2024	-	-
Fxa7Ag202220.1	4869ee4256c532698a7cfa5e3c816588	498	Pfam	PF00332	Glycosyl hydrolases family 17	44	353	3.7e-71	29-08-2024	IPR000490	Glycoside hydrolase family 17
Fxa7Ag202220.1	4869ee4256c532698a7cfa5e3c816588	498	Phobius	SIGNAL_PEPTIDE_N_REGION	N-terminal region of a signal peptide.	1	27	-	29-08-2024	-	-
Fxa7Ag202220.1	4869ee4256c532698a7cfa5e3c816588	498	Phobius	SIGNAL_PEPTIDE	Signal peptide region	1	43	-	29-08-2024	-	-
Fxa3Ag100164.1	8362d41a9673d8ed76a221a9b6c9bd83	535	Phobius	NON_CYTOPLASMIC_DOMAIN	Region of a membrane-bound protein predicted to be outside the membrane, in the extracellular region.	31	512	-	29-08-2024	-	-
Fxa3Ag100164.1	8362d41a9673d8ed76a221a9b6c9bd83	535	Phobius	SIGNAL_PEPTIDE_N_REGION	N-terminal region of a signal peptide.	1	12	-	29-08-2024	-	-
Fxa3Ag100164.1	8362d41a9673d8ed76a221a9b6c9bd83	535	Phobius	CYTOPLASMIC_DOMAIN	Region of a membrane-bound protein predicted to be outside the membrane, in the cytoplasm.	533	535	-	29-08-2024	-	-
Fxa3Ag100164.1	8362d41a9673d8ed76a221a9b6c9bd83	535	Phobius	SIGNAL_PEPTIDE	Signal peptide region	1	30	-	29-08-2024	-	-
Fxa3Ag100164.1	8362d41a9673d8ed76a221a9b6c9bd83	535	Phobius	TRANSMEMBRANE	Region of a membrane-bound protein predicted to be embedded in the membrane.	513	532	-	29-08-2024	-	-
Fxa3Ag100164.1	8362d41a9673d8ed76a221a9b6c9bd83	535	Pfam	PF07983	X8 domain	391	462	1.7e-19	29-08-2024	IPR012946	X8 domain
Fxa3Ag100164.1	8362d41a9673d8ed76a221a9b6c9bd83	535	Phobius	SIGNAL_PEPTIDE_H_REGION	Hydrophobic region of a signal peptide.	13	24	-	29-08-2024	-	-
Fxa3Ag100164.1	8362d41a9673d8ed76a221a9b6c9bd83	535	Pfam	PF00332	Glycosyl hydrolases family 17	54	373	5.7e-66	29-08-2024	IPR000490	Glycoside hydrolase family 17
Fxa3Ag100164.1	8362d41a9673d8ed76a221a9b6c9bd83	535	Phobius	SIGNAL_PEPTIDE_C_REGION	C-terminal region of a signal peptide.	25	30	-	29-08-2024	-	-
Fxa4Dg102293.1	4ce7756cb651c765d7a63618c4d67fe4	410	MobiDBLite	mobidb-lite	consensus disorder prediction	331	410	-	29-08-2024	-	-
Fxa4Dg102293.1	4ce7756cb651c765d7a63618c4d67fe4	410	MobiDBLite	mobidb-lite	consensus disorder prediction	393	410	-	29-08-2024	-	-
Fxa4Dg102293.1	4ce7756cb651c765d7a63618c4d67fe4	410	Pfam	PF00332	Glycosyl hydrolases family 17	10	323	3e-75	29-08-2024	IPR000490	Glycoside hydrolase family 17
Fxa4Dg102293.1	4ce7756cb651c765d7a63618c4d67fe4	410	MobiDBLite	mobidb-lite	consensus disorder prediction	343	370	-	29-08-2024	-	-
Fxa2Ag101877.1	65cc79ceb87f37fe3f52c7857e343dd0	457	Phobius	SIGNAL_PEPTIDE	Signal peptide region	1	20	-	29-08-2024	-	-
Fxa2Ag101877.1	65cc79ceb87f37fe3f52c7857e343dd0	457	Phobius	NON_CYTOPLASMIC_DOMAIN	Region of a membrane-bound protein predicted to be outside the membrane, in the extracellular region.	21	457	-	29-08-2024	-	-
Fxa2Ag101877.1	65cc79ceb87f37fe3f52c7857e343dd0	457	Phobius	SIGNAL_PEPTIDE_H_REGION	Hydrophobic region of a signal peptide.	3	15	-	29-08-2024	-	-
Fxa2Ag101877.1	65cc79ceb87f37fe3f52c7857e343dd0	457	Phobius	SIGNAL_PEPTIDE_C_REGION	C-terminal region of a signal peptide.	16	20	-	29-08-2024	-	-
Fxa2Ag101877.1	65cc79ceb87f37fe3f52c7857e343dd0	457	Pfam	PF00332	Glycosyl hydrolases family 17	26	342	1.6e-79	29-08-2024	IPR000490	Glycoside hydrolase family 17
Fxa2Ag101877.1	65cc79ceb87f37fe3f52c7857e343dd0	457	Phobius	SIGNAL_PEPTIDE_N_REGION	N-terminal region of a signal peptide.	1	2	-	29-08-2024	-	-
Fxa4Cg202506.1	b771c164a61686847c3a6cb3be48f908	454	Pfam	PF00332	Glycosyl hydrolases family 17	10	323	1.7e-76	29-08-2024	IPR000490	Glycoside hydrolase family 17
Fxa4Cg202506.1	b771c164a61686847c3a6cb3be48f908	454	MobiDBLite	mobidb-lite	consensus disorder prediction	325	342	-	29-08-2024	-	-
Fxa4Cg202506.1	b771c164a61686847c3a6cb3be48f908	454	MobiDBLite	mobidb-lite	consensus disorder prediction	375	390	-	29-08-2024	-	-
Fxa4Cg202506.1	b771c164a61686847c3a6cb3be48f908	454	MobiDBLite	mobidb-lite	consensus disorder prediction	325	400	-	29-08-2024	-	-
Fxa4Cg202506.1	b771c164a61686847c3a6cb3be48f908	454	Phobius	CYTOPLASMIC_DOMAIN	Region of a membrane-bound protein predicted to be outside the membrane, in the cytoplasm.	441	454	-	29-08-2024	-	-
Fxa4Cg202506.1	b771c164a61686847c3a6cb3be48f908	454	Phobius	TRANSMEMBRANE	Region of a membrane-bound protein predicted to be embedded in the membrane.	420	440	-	29-08-2024	-	-
Fxa4Cg202506.1	b771c164a61686847c3a6cb3be48f908	454	Phobius	NON_CYTOPLASMIC_DOMAIN	Region of a membrane-bound protein predicted to be outside the membrane, in the extracellular region.	1	419	-	29-08-2024	-	-
Fxa1Dg200499.1	a1ae0420f46fb2b04e41b194a531b717	498	Pfam	PF07983	X8 domain	365	436	5.1e-18	29-08-2024	IPR012946	X8 domain
Fxa1Dg200499.1	a1ae0420f46fb2b04e41b194a531b717	498	Phobius	CYTOPLASMIC_DOMAIN	Region of a membrane-bound protein predicted to be outside the membrane, in the cytoplasm.	497	498	-	29-08-2024	-	-
Fxa1Dg200499.1	a1ae0420f46fb2b04e41b194a531b717	498	Phobius	SIGNAL_PEPTIDE	Signal peptide region	1	23	-	29-08-2024	-	-
Fxa1Dg200499.1	a1ae0420f46fb2b04e41b194a531b717	498	Phobius	SIGNAL_PEPTIDE_N_REGION	N-terminal region of a signal peptide.	1	6	-	29-08-2024	-	-
Fxa1Dg200499.1	a1ae0420f46fb2b04e41b194a531b717	498	Phobius	SIGNAL_PEPTIDE_C_REGION	C-terminal region of a signal peptide.	19	23	-	29-08-2024	-	-
Fxa1Dg200499.1	a1ae0420f46fb2b04e41b194a531b717	498	Phobius	NON_CYTOPLASMIC_DOMAIN	Region of a membrane-bound protein predicted to be outside the membrane, in the extracellular region.	24	478	-	29-08-2024	-	-
Fxa1Dg200499.1	a1ae0420f46fb2b04e41b194a531b717	498	Phobius	SIGNAL_PEPTIDE_H_REGION	Hydrophobic region of a signal peptide.	7	18	-	29-08-2024	-	-
Fxa1Dg200499.1	a1ae0420f46fb2b04e41b194a531b717	498	Phobius	TRANSMEMBRANE	Region of a membrane-bound protein predicted to be embedded in the membrane.	479	496	-	29-08-2024	-	-
Fxa1Dg200499.1	a1ae0420f46fb2b04e41b194a531b717	498	Pfam	PF00332	Glycosyl hydrolases family 17	26	344	9.3e-90	29-08-2024	IPR000490	Glycoside hydrolase family 17
Fxa3Dg203164.1	d921fc6a24eba916eb25d36ec52ca6db	500	Phobius	SIGNAL_PEPTIDE_H_REGION	Hydrophobic region of a signal peptide.	4	14	-	29-08-2024	-	-
Fxa3Dg203164.1	d921fc6a24eba916eb25d36ec52ca6db	500	Phobius	NON_CYTOPLASMIC_DOMAIN	Region of a membrane-bound protein predicted to be outside the membrane, in the extracellular region.	22	475	-	29-08-2024	-	-
Fxa3Dg203164.1	d921fc6a24eba916eb25d36ec52ca6db	500	Phobius	SIGNAL_PEPTIDE_N_REGION	N-terminal region of a signal peptide.	1	3	-	29-08-2024	-	-
Fxa3Dg203164.1	d921fc6a24eba916eb25d36ec52ca6db	500	Pfam	PF00332	Glycosyl hydrolases family 17	22	363	2.1e-56	29-08-2024	IPR000490	Glycoside hydrolase family 17
Fxa3Dg203164.1	d921fc6a24eba916eb25d36ec52ca6db	500	Pfam	PF07983	X8 domain	383	450	1e-11	29-08-2024	IPR012946	X8 domain
Fxa3Dg203164.1	d921fc6a24eba916eb25d36ec52ca6db	500	Phobius	CYTOPLASMIC_DOMAIN	Region of a membrane-bound protein predicted to be outside the membrane, in the cytoplasm.	497	500	-	29-08-2024	-	-
Fxa3Dg203164.1	d921fc6a24eba916eb25d36ec52ca6db	500	Phobius	TRANSMEMBRANE	Region of a membrane-bound protein predicted to be embedded in the membrane.	476	496	-	29-08-2024	-	-
Fxa3Dg203164.1	d921fc6a24eba916eb25d36ec52ca6db	500	Phobius	SIGNAL_PEPTIDE	Signal peptide region	1	21	-	29-08-2024	-	-
Fxa3Dg203164.1	d921fc6a24eba916eb25d36ec52ca6db	500	Phobius	SIGNAL_PEPTIDE_C_REGION	C-terminal region of a signal peptide.	15	21	-	29-08-2024	-	-
Fxa5Dg201936.1	6ce0693dfa003dafe9e74834e63c39d3	139	Pfam	PF00332	Glycosyl hydrolases family 17	36	102	9e-12	29-08-2024	IPR000490	Glycoside hydrolase family 17
Fxa4Ag103269.1	a548e2d29b4181c7fbfd207721098f86	349	Phobius	TRANSMEMBRANE	Region of a membrane-bound protein predicted to be embedded in the membrane.	12	29	-	29-08-2024	-	-
Fxa4Ag103269.1	a548e2d29b4181c7fbfd207721098f86	349	Phobius	NON_CYTOPLASMIC_DOMAIN	Region of a membrane-bound protein predicted to be outside the membrane, in the extracellular region.	30	349	-	29-08-2024	-	-
Fxa4Ag103269.1	a548e2d29b4181c7fbfd207721098f86	349	Phobius	CYTOPLASMIC_DOMAIN	Region of a membrane-bound protein predicted to be outside the membrane, in the cytoplasm.	1	11	-	29-08-2024	-	-
Fxa4Ag103269.1	a548e2d29b4181c7fbfd207721098f86	349	Pfam	PF00332	Glycosyl hydrolases family 17	36	348	5.3e-79	29-08-2024	IPR000490	Glycoside hydrolase family 17
Fxa6Bg103698.1	eb5bb486e380e63f30c158e8ec565693	475	Phobius	SIGNAL_PEPTIDE_N_REGION	N-terminal region of a signal peptide.	1	7	-	29-08-2024	-	-
Fxa6Bg103698.1	eb5bb486e380e63f30c158e8ec565693	475	Pfam	PF00332	Glycosyl hydrolases family 17	25	344	8.3e-84	29-08-2024	IPR000490	Glycoside hydrolase family 17
Fxa6Bg103698.1	eb5bb486e380e63f30c158e8ec565693	475	Phobius	SIGNAL_PEPTIDE_H_REGION	Hydrophobic region of a signal peptide.	8	17	-	29-08-2024	-	-
Fxa6Bg103698.1	eb5bb486e380e63f30c158e8ec565693	475	Phobius	NON_CYTOPLASMIC_DOMAIN	Region of a membrane-bound protein predicted to be outside the membrane, in the extracellular region.	23	475	-	29-08-2024	-	-
Fxa6Bg103698.1	eb5bb486e380e63f30c158e8ec565693	475	Phobius	SIGNAL_PEPTIDE_C_REGION	C-terminal region of a signal peptide.	18	22	-	29-08-2024	-	-
Fxa6Bg103698.1	eb5bb486e380e63f30c158e8ec565693	475	Phobius	SIGNAL_PEPTIDE	Signal peptide region	1	22	-	29-08-2024	-	-
Fxa6Bg103698.1	eb5bb486e380e63f30c158e8ec565693	475	Pfam	PF07983	X8 domain	387	458	5.7e-20	29-08-2024	IPR012946	X8 domain
Fxa3Bg203832.1	76a61719d2acd1dde41d61cbfcc61e97	798	Pfam	PF00332	Glycosyl hydrolases family 17	330	649	5.6e-69	29-08-2024	IPR000490	Glycoside hydrolase family 17
Fxa3Bg203832.1	76a61719d2acd1dde41d61cbfcc61e97	798	MobiDBLite	mobidb-lite	consensus disorder prediction	1	42	-	29-08-2024	-	-
Fxa3Bg203832.1	76a61719d2acd1dde41d61cbfcc61e97	798	Phobius	NON_CYTOPLASMIC_DOMAIN	Region of a membrane-bound protein predicted to be outside the membrane, in the extracellular region.	323	798	-	29-08-2024	-	-
Fxa3Bg203832.1	76a61719d2acd1dde41d61cbfcc61e97	798	MobiDBLite	mobidb-lite	consensus disorder prediction	165	185	-	29-08-2024	-	-
Fxa3Bg203832.1	76a61719d2acd1dde41d61cbfcc61e97	798	MobiDBLite	mobidb-lite	consensus disorder prediction	27	42	-	29-08-2024	-	-
Fxa3Bg203832.1	76a61719d2acd1dde41d61cbfcc61e97	798	MobiDBLite	mobidb-lite	consensus disorder prediction	117	248	-	29-08-2024	-	-
Fxa3Bg203832.1	76a61719d2acd1dde41d61cbfcc61e97	798	Phobius	TRANSMEMBRANE	Region of a membrane-bound protein predicted to be embedded in the membrane.	296	322	-	29-08-2024	-	-
Fxa3Bg203832.1	76a61719d2acd1dde41d61cbfcc61e97	798	MobiDBLite	mobidb-lite	consensus disorder prediction	117	146	-	29-08-2024	-	-
Fxa3Bg203832.1	76a61719d2acd1dde41d61cbfcc61e97	798	Pfam	PF07983	X8 domain	664	734	2.3e-16	29-08-2024	IPR012946	X8 domain
Fxa3Bg203832.1	76a61719d2acd1dde41d61cbfcc61e97	798	Pfam	PF00076	RNA recognition motif	41	110	1.3e-14	29-08-2024	IPR000504	RNA recognition motif domain
Fxa3Bg203832.1	76a61719d2acd1dde41d61cbfcc61e97	798	Phobius	CYTOPLASMIC_DOMAIN	Region of a membrane-bound protein predicted to be outside the membrane, in the cytoplasm.	1	295	-	29-08-2024	-	-
Fxa3Bg203832.1	76a61719d2acd1dde41d61cbfcc61e97	798	MobiDBLite	mobidb-lite	consensus disorder prediction	206	235	-	29-08-2024	-	-
Fxa4Bg101880.1	32dd0406482b4778c31241da89abffc2	370	Phobius	NON_CYTOPLASMIC_DOMAIN	Region of a membrane-bound protein predicted to be outside the membrane, in the extracellular region.	33	370	-	29-08-2024	-	-
Fxa4Bg101880.1	32dd0406482b4778c31241da89abffc2	370	Phobius	SIGNAL_PEPTIDE_C_REGION	C-terminal region of a signal peptide.	26	32	-	29-08-2024	-	-
Fxa4Bg101880.1	32dd0406482b4778c31241da89abffc2	370	Pfam	PF00332	Glycosyl hydrolases family 17	34	347	7e-109	29-08-2024	IPR000490	Glycoside hydrolase family 17
Fxa4Bg101880.1	32dd0406482b4778c31241da89abffc2	370	Phobius	SIGNAL_PEPTIDE_H_REGION	Hydrophobic region of a signal peptide.	14	25	-	29-08-2024	-	-
Fxa4Bg101880.1	32dd0406482b4778c31241da89abffc2	370	Phobius	SIGNAL_PEPTIDE	Signal peptide region	1	32	-	29-08-2024	-	-
Fxa4Bg101880.1	32dd0406482b4778c31241da89abffc2	370	Phobius	SIGNAL_PEPTIDE_N_REGION	N-terminal region of a signal peptide.	1	13	-	29-08-2024	-	-
Fxa6Cg103193.1	a0dbda9e2626629671a94dd8cbb7657c	103	Pfam	PF00332	Glycosyl hydrolases family 17	59	102	0.00018	29-08-2024	IPR000490	Glycoside hydrolase family 17
Fxa3Bg203085.1	6d466c93dbe418a0c34f480e95411b2d	734	MobiDBLite	mobidb-lite	consensus disorder prediction	15	29	-	29-08-2024	-	-
Fxa3Bg203085.1	6d466c93dbe418a0c34f480e95411b2d	734	Pfam	PF00332	Glycosyl hydrolases family 17	454	543	1.2e-23	29-08-2024	IPR000490	Glycoside hydrolase family 17
Fxa3Bg203085.1	6d466c93dbe418a0c34f480e95411b2d	734	Pfam	PF00332	Glycosyl hydrolases family 17	123	335	1.7e-31	29-08-2024	IPR000490	Glycoside hydrolase family 17
Fxa3Bg203085.1	6d466c93dbe418a0c34f480e95411b2d	734	Pfam	PF07983	X8 domain	590	660	5.3e-19	29-08-2024	IPR012946	X8 domain
Fxa3Bg203085.1	6d466c93dbe418a0c34f480e95411b2d	734	MobiDBLite	mobidb-lite	consensus disorder prediction	1	42	-	29-08-2024	-	-
Fxa3Bg203085.1	6d466c93dbe418a0c34f480e95411b2d	734	MobiDBLite	mobidb-lite	consensus disorder prediction	551	580	-	29-08-2024	-	-
Fxa1Ag100568.1	b5f40794a11ebb3f7a533cbd7d643004	498	Phobius	CYTOPLASMIC_DOMAIN	Region of a membrane-bound protein predicted to be outside the membrane, in the cytoplasm.	497	498	-	29-08-2024	-	-
Fxa1Ag100568.1	b5f40794a11ebb3f7a533cbd7d643004	498	Phobius	SIGNAL_PEPTIDE	Signal peptide region	1	23	-	29-08-2024	-	-
Fxa1Ag100568.1	b5f40794a11ebb3f7a533cbd7d643004	498	Phobius	SIGNAL_PEPTIDE_N_REGION	N-terminal region of a signal peptide.	1	6	-	29-08-2024	-	-
Fxa1Ag100568.1	b5f40794a11ebb3f7a533cbd7d643004	498	Phobius	SIGNAL_PEPTIDE_C_REGION	C-terminal region of a signal peptide.	19	23	-	29-08-2024	-	-
Fxa1Ag100568.1	b5f40794a11ebb3f7a533cbd7d643004	498	Phobius	NON_CYTOPLASMIC_DOMAIN	Region of a membrane-bound protein predicted to be outside the membrane, in the extracellular region.	24	478	-	29-08-2024	-	-
Fxa1Ag100568.1	b5f40794a11ebb3f7a533cbd7d643004	498	Pfam	PF07983	X8 domain	365	436	2.6e-17	29-08-2024	IPR012946	X8 domain
Fxa1Ag100568.1	b5f40794a11ebb3f7a533cbd7d643004	498	Phobius	TRANSMEMBRANE	Region of a membrane-bound protein predicted to be embedded in the membrane.	479	496	-	29-08-2024	-	-
Fxa1Ag100568.1	b5f40794a11ebb3f7a533cbd7d643004	498	Phobius	SIGNAL_PEPTIDE_H_REGION	Hydrophobic region of a signal peptide.	7	18	-	29-08-2024	-	-
Fxa1Ag100568.1	b5f40794a11ebb3f7a533cbd7d643004	498	Pfam	PF00332	Glycosyl hydrolases family 17	26	344	1.8e-89	29-08-2024	IPR000490	Glycoside hydrolase family 17
Fxa3Bg202178.1	d2a475855122cac0bb24dfe7df52b0cd	454	Pfam	PF00332	Glycosyl hydrolases family 17	45	360	2e-83	29-08-2024	IPR000490	Glycoside hydrolase family 17
Fxa1Dg202811.1	71f3533eb03d30f3e863b23e5aa11fa5	571	Phobius	TRANSMEMBRANE	Region of a membrane-bound protein predicted to be embedded in the membrane.	550	570	-	29-08-2024	-	-
Fxa1Dg202811.1	71f3533eb03d30f3e863b23e5aa11fa5	571	Phobius	TRANSMEMBRANE	Region of a membrane-bound protein predicted to be embedded in the membrane.	90	109	-	29-08-2024	-	-
Fxa1Dg202811.1	71f3533eb03d30f3e863b23e5aa11fa5	571	Pfam	PF07983	X8 domain	457	527	2.7e-12	29-08-2024	IPR012946	X8 domain
Fxa1Dg202811.1	71f3533eb03d30f3e863b23e5aa11fa5	571	Phobius	NON_CYTOPLASMIC_DOMAIN	Region of a membrane-bound protein predicted to be outside the membrane, in the extracellular region.	34	60	-	29-08-2024	-	-
Fxa1Dg202811.1	71f3533eb03d30f3e863b23e5aa11fa5	571	Phobius	CYTOPLASMIC_DOMAIN	Region of a membrane-bound protein predicted to be outside the membrane, in the cytoplasm.	1	11	-	29-08-2024	-	-
Fxa1Dg202811.1	71f3533eb03d30f3e863b23e5aa11fa5	571	Phobius	CYTOPLASMIC_DOMAIN	Region of a membrane-bound protein predicted to be outside the membrane, in the cytoplasm.	571	571	-	29-08-2024	-	-
Fxa1Dg202811.1	71f3533eb03d30f3e863b23e5aa11fa5	571	Pfam	PF00332	Glycosyl hydrolases family 17	114	435	1.8e-61	29-08-2024	IPR000490	Glycoside hydrolase family 17
Fxa1Dg202811.1	71f3533eb03d30f3e863b23e5aa11fa5	571	Phobius	TRANSMEMBRANE	Region of a membrane-bound protein predicted to be embedded in the membrane.	61	78	-	29-08-2024	-	-
Fxa1Dg202811.1	71f3533eb03d30f3e863b23e5aa11fa5	571	Phobius	TRANSMEMBRANE	Region of a membrane-bound protein predicted to be embedded in the membrane.	12	33	-	29-08-2024	-	-
Fxa1Dg202811.1	71f3533eb03d30f3e863b23e5aa11fa5	571	Phobius	NON_CYTOPLASMIC_DOMAIN	Region of a membrane-bound protein predicted to be outside the membrane, in the extracellular region.	110	549	-	29-08-2024	-	-
Fxa1Dg202811.1	71f3533eb03d30f3e863b23e5aa11fa5	571	Phobius	CYTOPLASMIC_DOMAIN	Region of a membrane-bound protein predicted to be outside the membrane, in the cytoplasm.	79	89	-	29-08-2024	-	-
Fxa2Ag100846.1	4850ac3330e8e619f32f5223910e179d	513	Pfam	PF07983	X8 domain	378	450	7.2e-17	29-08-2024	IPR012946	X8 domain
Fxa2Ag100846.1	4850ac3330e8e619f32f5223910e179d	513	MobiDBLite	mobidb-lite	consensus disorder prediction	353	375	-	29-08-2024	-	-
Fxa2Ag100846.1	4850ac3330e8e619f32f5223910e179d	513	Pfam	PF00332	Glycosyl hydrolases family 17	36	352	5.5e-76	29-08-2024	IPR000490	Glycoside hydrolase family 17
Fxa2Cg201049.1	989911ebd681d7575abd5bd7da72c237	486	Phobius	NON_CYTOPLASMIC_DOMAIN	Region of a membrane-bound protein predicted to be outside the membrane, in the extracellular region.	33	466	-	29-08-2024	-	-
Fxa2Cg201049.1	989911ebd681d7575abd5bd7da72c237	486	Phobius	CYTOPLASMIC_DOMAIN	Region of a membrane-bound protein predicted to be outside the membrane, in the cytoplasm.	1	11	-	29-08-2024	-	-
Fxa2Cg201049.1	989911ebd681d7575abd5bd7da72c237	486	Pfam	PF00332	Glycosyl hydrolases family 17	28	346	2.9e-62	29-08-2024	IPR000490	Glycoside hydrolase family 17
Fxa2Cg201049.1	989911ebd681d7575abd5bd7da72c237	486	Pfam	PF07983	X8 domain	365	434	8.6e-10	29-08-2024	IPR012946	X8 domain
Fxa2Cg201049.1	989911ebd681d7575abd5bd7da72c237	486	Phobius	TRANSMEMBRANE	Region of a membrane-bound protein predicted to be embedded in the membrane.	12	32	-	29-08-2024	-	-
Fxa2Cg201049.1	989911ebd681d7575abd5bd7da72c237	486	Phobius	CYTOPLASMIC_DOMAIN	Region of a membrane-bound protein predicted to be outside the membrane, in the cytoplasm.	486	486	-	29-08-2024	-	-
Fxa2Cg201049.1	989911ebd681d7575abd5bd7da72c237	486	Phobius	TRANSMEMBRANE	Region of a membrane-bound protein predicted to be embedded in the membrane.	467	485	-	29-08-2024	-	-
Fxa4Dg100004.1	5aedb50990f0d1135252e943d4ab11be	506	Phobius	TRANSMEMBRANE	Region of a membrane-bound protein predicted to be embedded in the membrane.	21	49	-	29-08-2024	-	-
Fxa4Dg100004.1	5aedb50990f0d1135252e943d4ab11be	506	Pfam	PF00332	Glycosyl hydrolases family 17	45	363	3e-63	29-08-2024	IPR000490	Glycoside hydrolase family 17
Fxa4Dg100004.1	5aedb50990f0d1135252e943d4ab11be	506	Phobius	CYTOPLASMIC_DOMAIN	Region of a membrane-bound protein predicted to be outside the membrane, in the cytoplasm.	1	20	-	29-08-2024	-	-
Fxa4Dg100004.1	5aedb50990f0d1135252e943d4ab11be	506	Phobius	NON_CYTOPLASMIC_DOMAIN	Region of a membrane-bound protein predicted to be outside the membrane, in the extracellular region.	50	506	-	29-08-2024	-	-
Fxa4Dg100004.1	5aedb50990f0d1135252e943d4ab11be	506	Pfam	PF07983	X8 domain	384	453	4.9e-11	29-08-2024	IPR012946	X8 domain
Fxa1Cg103023.1	c1720b6f486df0451a9d2abe2f820c52	599	Phobius	SIGNAL_PEPTIDE_C_REGION	C-terminal region of a signal peptide.	22	28	-	29-08-2024	-	-
Fxa1Cg103023.1	c1720b6f486df0451a9d2abe2f820c52	599	Phobius	SIGNAL_PEPTIDE	Signal peptide region	1	28	-	29-08-2024	-	-
Fxa1Cg103023.1	c1720b6f486df0451a9d2abe2f820c52	599	Pfam	PF07983	X8 domain	372	442	2.9e-12	29-08-2024	IPR012946	X8 domain
Fxa1Cg103023.1	c1720b6f486df0451a9d2abe2f820c52	599	Pfam	PF00332	Glycosyl hydrolases family 17	29	350	2.1e-61	29-08-2024	IPR000490	Glycoside hydrolase family 17
Fxa1Cg103023.1	c1720b6f486df0451a9d2abe2f820c52	599	Phobius	SIGNAL_PEPTIDE_H_REGION	Hydrophobic region of a signal peptide.	10	21	-	29-08-2024	-	-
Fxa1Cg103023.1	c1720b6f486df0451a9d2abe2f820c52	599	Phobius	SIGNAL_PEPTIDE_N_REGION	N-terminal region of a signal peptide.	1	9	-	29-08-2024	-	-
Fxa1Cg103023.1	c1720b6f486df0451a9d2abe2f820c52	599	Phobius	NON_CYTOPLASMIC_DOMAIN	Region of a membrane-bound protein predicted to be outside the membrane, in the extracellular region.	29	599	-	29-08-2024	-	-
Fxa3Bg200481.1	a89c715e22aeb067a580af37df64b800	407	Phobius	SIGNAL_PEPTIDE	Signal peptide region	1	28	-	29-08-2024	-	-
Fxa3Bg200481.1	a89c715e22aeb067a580af37df64b800	407	Phobius	NON_CYTOPLASMIC_DOMAIN	Region of a membrane-bound protein predicted to be outside the membrane, in the extracellular region.	29	383	-	29-08-2024	-	-
Fxa3Bg200481.1	a89c715e22aeb067a580af37df64b800	407	Pfam	PF00332	Glycosyl hydrolases family 17	29	346	1e-76	29-08-2024	IPR000490	Glycoside hydrolase family 17
Fxa3Bg200481.1	a89c715e22aeb067a580af37df64b800	407	Phobius	SIGNAL_PEPTIDE_H_REGION	Hydrophobic region of a signal peptide.	12	23	-	29-08-2024	-	-
Fxa3Bg200481.1	a89c715e22aeb067a580af37df64b800	407	Phobius	TRANSMEMBRANE	Region of a membrane-bound protein predicted to be embedded in the membrane.	384	403	-	29-08-2024	-	-
Fxa3Bg200481.1	a89c715e22aeb067a580af37df64b800	407	Phobius	SIGNAL_PEPTIDE_C_REGION	C-terminal region of a signal peptide.	24	28	-	29-08-2024	-	-
Fxa3Bg200481.1	a89c715e22aeb067a580af37df64b800	407	Phobius	SIGNAL_PEPTIDE_N_REGION	N-terminal region of a signal peptide.	1	11	-	29-08-2024	-	-
Fxa3Bg200481.1	a89c715e22aeb067a580af37df64b800	407	Phobius	CYTOPLASMIC_DOMAIN	Region of a membrane-bound protein predicted to be outside the membrane, in the cytoplasm.	404	407	-	29-08-2024	-	-
Fxa1Bg200546.1	b12c39cad7fcb865d048c6d0fe546da2	627	Phobius	SIGNAL_PEPTIDE_H_REGION	Hydrophobic region of a signal peptide.	12	22	-	29-08-2024	-	-
Fxa1Bg200546.1	b12c39cad7fcb865d048c6d0fe546da2	627	Phobius	SIGNAL_PEPTIDE_C_REGION	C-terminal region of a signal peptide.	23	27	-	29-08-2024	-	-
Fxa1Bg200546.1	b12c39cad7fcb865d048c6d0fe546da2	627	Pfam	PF07983	X8 domain	369	440	7.1e-18	29-08-2024	IPR012946	X8 domain
Fxa1Bg200546.1	b12c39cad7fcb865d048c6d0fe546da2	627	Pfam	PF00332	Glycosyl hydrolases family 17	30	348	8.1e-87	29-08-2024	IPR000490	Glycoside hydrolase family 17
Fxa1Bg200546.1	b12c39cad7fcb865d048c6d0fe546da2	627	Phobius	NON_CYTOPLASMIC_DOMAIN	Region of a membrane-bound protein predicted to be outside the membrane, in the extracellular region.	28	627	-	29-08-2024	-	-
Fxa1Bg200546.1	b12c39cad7fcb865d048c6d0fe546da2	627	Phobius	SIGNAL_PEPTIDE_N_REGION	N-terminal region of a signal peptide.	1	11	-	29-08-2024	-	-
Fxa1Bg200546.1	b12c39cad7fcb865d048c6d0fe546da2	627	Phobius	SIGNAL_PEPTIDE	Signal peptide region	1	27	-	29-08-2024	-	-
Fxa1Cg100730.1	955c74dd571a4dd4743131eaf0d2ad88	414	Pfam	PF00332	Glycosyl hydrolases family 17	43	347	4.4e-85	29-08-2024	IPR000490	Glycoside hydrolase family 17
Fxa3Cg100156.1	792fa734ad6697e4218092765dd8063b	535	Phobius	NON_CYTOPLASMIC_DOMAIN	Region of a membrane-bound protein predicted to be outside the membrane, in the extracellular region.	31	512	-	29-08-2024	-	-
Fxa3Cg100156.1	792fa734ad6697e4218092765dd8063b	535	Phobius	SIGNAL_PEPTIDE_N_REGION	N-terminal region of a signal peptide.	1	12	-	29-08-2024	-	-
Fxa3Cg100156.1	792fa734ad6697e4218092765dd8063b	535	Phobius	CYTOPLASMIC_DOMAIN	Region of a membrane-bound protein predicted to be outside the membrane, in the cytoplasm.	533	535	-	29-08-2024	-	-
Fxa3Cg100156.1	792fa734ad6697e4218092765dd8063b	535	Phobius	SIGNAL_PEPTIDE	Signal peptide region	1	30	-	29-08-2024	-	-
Fxa3Cg100156.1	792fa734ad6697e4218092765dd8063b	535	Phobius	TRANSMEMBRANE	Region of a membrane-bound protein predicted to be embedded in the membrane.	513	532	-	29-08-2024	-	-
Fxa3Cg100156.1	792fa734ad6697e4218092765dd8063b	535	Pfam	PF07983	X8 domain	391	462	1.7e-19	29-08-2024	IPR012946	X8 domain
Fxa3Cg100156.1	792fa734ad6697e4218092765dd8063b	535	Pfam	PF00332	Glycosyl hydrolases family 17	54	373	3.4e-66	29-08-2024	IPR000490	Glycoside hydrolase family 17
Fxa3Cg100156.1	792fa734ad6697e4218092765dd8063b	535	Phobius	SIGNAL_PEPTIDE_H_REGION	Hydrophobic region of a signal peptide.	13	24	-	29-08-2024	-	-
Fxa3Cg100156.1	792fa734ad6697e4218092765dd8063b	535	Phobius	SIGNAL_PEPTIDE_C_REGION	C-terminal region of a signal peptide.	25	30	-	29-08-2024	-	-
Fxa3Ag100509.1	206059edd64679e5452efdd6b98a17ec	403	Phobius	SIGNAL_PEPTIDE	Signal peptide region	1	28	-	29-08-2024	-	-
Fxa3Ag100509.1	206059edd64679e5452efdd6b98a17ec	403	Phobius	SIGNAL_PEPTIDE_H_REGION	Hydrophobic region of a signal peptide.	12	23	-	29-08-2024	-	-
Fxa3Ag100509.1	206059edd64679e5452efdd6b98a17ec	403	Pfam	PF00332	Glycosyl hydrolases family 17	29	346	4e-77	29-08-2024	IPR000490	Glycoside hydrolase family 17
Fxa3Ag100509.1	206059edd64679e5452efdd6b98a17ec	403	Phobius	NON_CYTOPLASMIC_DOMAIN	Region of a membrane-bound protein predicted to be outside the membrane, in the extracellular region.	29	379	-	29-08-2024	-	-
Fxa3Ag100509.1	206059edd64679e5452efdd6b98a17ec	403	Phobius	TRANSMEMBRANE	Region of a membrane-bound protein predicted to be embedded in the membrane.	380	399	-	29-08-2024	-	-
Fxa3Ag100509.1	206059edd64679e5452efdd6b98a17ec	403	Phobius	SIGNAL_PEPTIDE_C_REGION	C-terminal region of a signal peptide.	24	28	-	29-08-2024	-	-
Fxa3Ag100509.1	206059edd64679e5452efdd6b98a17ec	403	Phobius	SIGNAL_PEPTIDE_N_REGION	N-terminal region of a signal peptide.	1	11	-	29-08-2024	-	-
Fxa3Ag100509.1	206059edd64679e5452efdd6b98a17ec	403	Phobius	CYTOPLASMIC_DOMAIN	Region of a membrane-bound protein predicted to be outside the membrane, in the cytoplasm.	400	403	-	29-08-2024	-	-
Fxa3Bg200167.1	1568b862f9d741df78a2fc41ba9ab8c1	534	Phobius	TRANSMEMBRANE	Region of a membrane-bound protein predicted to be embedded in the membrane.	512	531	-	29-08-2024	-	-
Fxa3Bg200167.1	1568b862f9d741df78a2fc41ba9ab8c1	534	Phobius	SIGNAL_PEPTIDE_N_REGION	N-terminal region of a signal peptide.	1	12	-	29-08-2024	-	-
Fxa3Bg200167.1	1568b862f9d741df78a2fc41ba9ab8c1	534	Phobius	SIGNAL_PEPTIDE_C_REGION	C-terminal region of a signal peptide.	25	32	-	29-08-2024	-	-
Fxa3Bg200167.1	1568b862f9d741df78a2fc41ba9ab8c1	534	Phobius	NON_CYTOPLASMIC_DOMAIN	Region of a membrane-bound protein predicted to be outside the membrane, in the extracellular region.	33	511	-	29-08-2024	-	-
Fxa3Bg200167.1	1568b862f9d741df78a2fc41ba9ab8c1	534	Phobius	CYTOPLASMIC_DOMAIN	Region of a membrane-bound protein predicted to be outside the membrane, in the cytoplasm.	532	534	-	29-08-2024	-	-
Fxa3Bg200167.1	1568b862f9d741df78a2fc41ba9ab8c1	534	Pfam	PF07983	X8 domain	390	461	7.8e-19	29-08-2024	IPR012946	X8 domain
Fxa3Bg200167.1	1568b862f9d741df78a2fc41ba9ab8c1	534	Phobius	SIGNAL_PEPTIDE_H_REGION	Hydrophobic region of a signal peptide.	13	24	-	29-08-2024	-	-
Fxa3Bg200167.1	1568b862f9d741df78a2fc41ba9ab8c1	534	Phobius	SIGNAL_PEPTIDE	Signal peptide region	1	32	-	29-08-2024	-	-
Fxa3Bg200167.1	1568b862f9d741df78a2fc41ba9ab8c1	534	Pfam	PF00332	Glycosyl hydrolases family 17	53	372	4.7e-67	29-08-2024	IPR000490	Glycoside hydrolase family 17
Fxa2Bg201691.1	7759d41e5e123320232bf19e03405e2c	272	Phobius	SIGNAL_PEPTIDE	Signal peptide region	1	20	-	29-08-2024	-	-
Fxa2Bg201691.1	7759d41e5e123320232bf19e03405e2c	272	Phobius	SIGNAL_PEPTIDE_H_REGION	Hydrophobic region of a signal peptide.	3	15	-	29-08-2024	-	-
Fxa2Bg201691.1	7759d41e5e123320232bf19e03405e2c	272	Pfam	PF00332	Glycosyl hydrolases family 17	26	272	3.2e-61	29-08-2024	IPR000490	Glycoside hydrolase family 17
Fxa2Bg201691.1	7759d41e5e123320232bf19e03405e2c	272	Phobius	SIGNAL_PEPTIDE_C_REGION	C-terminal region of a signal peptide.	16	20	-	29-08-2024	-	-
Fxa2Bg201691.1	7759d41e5e123320232bf19e03405e2c	272	Phobius	NON_CYTOPLASMIC_DOMAIN	Region of a membrane-bound protein predicted to be outside the membrane, in the extracellular region.	21	272	-	29-08-2024	-	-
Fxa2Bg201691.1	7759d41e5e123320232bf19e03405e2c	272	Phobius	SIGNAL_PEPTIDE_N_REGION	N-terminal region of a signal peptide.	1	2	-	29-08-2024	-	-
Fxa4Bg103097.1	6758f9a984672c83ccc074672bd556cd	349	Phobius	SIGNAL_PEPTIDE_H_REGION	Hydrophobic region of a signal peptide.	13	23	-	29-08-2024	-	-
Fxa4Bg103097.1	6758f9a984672c83ccc074672bd556cd	349	Phobius	SIGNAL_PEPTIDE_N_REGION	N-terminal region of a signal peptide.	1	12	-	29-08-2024	-	-
Fxa4Bg103097.1	6758f9a984672c83ccc074672bd556cd	349	Phobius	SIGNAL_PEPTIDE	Signal peptide region	1	31	-	29-08-2024	-	-
Fxa4Bg103097.1	6758f9a984672c83ccc074672bd556cd	349	Pfam	PF00332	Glycosyl hydrolases family 17	36	348	2.1e-79	29-08-2024	IPR000490	Glycoside hydrolase family 17
Fxa4Bg103097.1	6758f9a984672c83ccc074672bd556cd	349	Phobius	NON_CYTOPLASMIC_DOMAIN	Region of a membrane-bound protein predicted to be outside the membrane, in the extracellular region.	32	349	-	29-08-2024	-	-
Fxa4Bg103097.1	6758f9a984672c83ccc074672bd556cd	349	Phobius	SIGNAL_PEPTIDE_C_REGION	C-terminal region of a signal peptide.	24	31	-	29-08-2024	-	-
Fxa2Ag103028.1	49294076b976ee80f03db3945665b6b7	484	Phobius	NON_CYTOPLASMIC_DOMAIN	Region of a membrane-bound protein predicted to be outside the membrane, in the extracellular region.	26	462	-	29-08-2024	-	-
Fxa2Ag103028.1	49294076b976ee80f03db3945665b6b7	484	Phobius	SIGNAL_PEPTIDE_C_REGION	C-terminal region of a signal peptide.	21	25	-	29-08-2024	-	-
Fxa2Ag103028.1	49294076b976ee80f03db3945665b6b7	484	Phobius	TRANSMEMBRANE	Region of a membrane-bound protein predicted to be embedded in the membrane.	463	483	-	29-08-2024	-	-
Fxa2Ag103028.1	49294076b976ee80f03db3945665b6b7	484	Phobius	SIGNAL_PEPTIDE_N_REGION	N-terminal region of a signal peptide.	1	8	-	29-08-2024	-	-
Fxa2Ag103028.1	49294076b976ee80f03db3945665b6b7	484	Pfam	PF07983	X8 domain	363	432	8.6e-10	29-08-2024	IPR012946	X8 domain
Fxa2Ag103028.1	49294076b976ee80f03db3945665b6b7	484	Phobius	SIGNAL_PEPTIDE	Signal peptide region	1	25	-	29-08-2024	-	-
Fxa2Ag103028.1	49294076b976ee80f03db3945665b6b7	484	Phobius	CYTOPLASMIC_DOMAIN	Region of a membrane-bound protein predicted to be outside the membrane, in the cytoplasm.	484	484	-	29-08-2024	-	-
Fxa2Ag103028.1	49294076b976ee80f03db3945665b6b7	484	Pfam	PF00332	Glycosyl hydrolases family 17	26	344	2.2e-61	29-08-2024	IPR000490	Glycoside hydrolase family 17
Fxa2Ag103028.1	49294076b976ee80f03db3945665b6b7	484	Phobius	SIGNAL_PEPTIDE_H_REGION	Hydrophobic region of a signal peptide.	9	20	-	29-08-2024	-	-
Fxa3Bg202427.1	f61b00b05d5a012605a65f1b7b9e69ff	346	Phobius	SIGNAL_PEPTIDE_N_REGION	N-terminal region of a signal peptide.	1	15	-	29-08-2024	-	-
Fxa3Bg202427.1	f61b00b05d5a012605a65f1b7b9e69ff	346	Phobius	SIGNAL_PEPTIDE_C_REGION	C-terminal region of a signal peptide.	28	34	-	29-08-2024	-	-
Fxa3Bg202427.1	f61b00b05d5a012605a65f1b7b9e69ff	346	Pfam	PF00332	Glycosyl hydrolases family 17	36	345	3.4e-106	29-08-2024	IPR000490	Glycoside hydrolase family 17
Fxa3Bg202427.1	f61b00b05d5a012605a65f1b7b9e69ff	346	Phobius	SIGNAL_PEPTIDE	Signal peptide region	1	34	-	29-08-2024	-	-
Fxa3Bg202427.1	f61b00b05d5a012605a65f1b7b9e69ff	346	Phobius	NON_CYTOPLASMIC_DOMAIN	Region of a membrane-bound protein predicted to be outside the membrane, in the extracellular region.	35	346	-	29-08-2024	-	-
Fxa3Bg202427.1	f61b00b05d5a012605a65f1b7b9e69ff	346	Phobius	SIGNAL_PEPTIDE_H_REGION	Hydrophobic region of a signal peptide.	16	27	-	29-08-2024	-	-
Fxa4Ag100007.1	7e3180c0d34567422f6f7009d73fc220	506	Phobius	NON_CYTOPLASMIC_DOMAIN	Region of a membrane-bound protein predicted to be outside the membrane, in the extracellular region.	506	506	-	29-08-2024	-	-
Fxa4Ag100007.1	7e3180c0d34567422f6f7009d73fc220	506	Phobius	CYTOPLASMIC_DOMAIN	Region of a membrane-bound protein predicted to be outside the membrane, in the cytoplasm.	48	486	-	29-08-2024	-	-
Fxa4Ag100007.1	7e3180c0d34567422f6f7009d73fc220	506	Phobius	TRANSMEMBRANE	Region of a membrane-bound protein predicted to be embedded in the membrane.	25	47	-	29-08-2024	-	-
Fxa4Ag100007.1	7e3180c0d34567422f6f7009d73fc220	506	Pfam	PF00332	Glycosyl hydrolases family 17	45	363	1.1e-62	29-08-2024	IPR000490	Glycoside hydrolase family 17
Fxa4Ag100007.1	7e3180c0d34567422f6f7009d73fc220	506	Pfam	PF07983	X8 domain	384	453	7e-11	29-08-2024	IPR012946	X8 domain
Fxa4Ag100007.1	7e3180c0d34567422f6f7009d73fc220	506	Phobius	NON_CYTOPLASMIC_DOMAIN	Region of a membrane-bound protein predicted to be outside the membrane, in the extracellular region.	1	24	-	29-08-2024	-	-
Fxa4Ag100007.1	7e3180c0d34567422f6f7009d73fc220	506	Phobius	TRANSMEMBRANE	Region of a membrane-bound protein predicted to be embedded in the membrane.	487	505	-	29-08-2024	-	-
AAA34103_PR2_N.tabacum	a91a5ed5f32001941a172a1b65313ee0	343	Phobius	NON_CYTOPLASMIC_DOMAIN	Region of a membrane-bound protein predicted to be outside the membrane, in the extracellular region.	30	343	-	29-08-2024	-	-
AAA34103_PR2_N.tabacum	a91a5ed5f32001941a172a1b65313ee0	343	Phobius	SIGNAL_PEPTIDE_N_REGION	N-terminal region of a signal peptide.	1	9	-	29-08-2024	-	-
AAA34103_PR2_N.tabacum	a91a5ed5f32001941a172a1b65313ee0	343	Pfam	PF00332	Glycosyl hydrolases family 17	32	342	5.5e-119	29-08-2024	IPR000490	Glycoside hydrolase family 17
AAA34103_PR2_N.tabacum	a91a5ed5f32001941a172a1b65313ee0	343	Phobius	SIGNAL_PEPTIDE	Signal peptide region	1	29	-	29-08-2024	-	-
AAA34103_PR2_N.tabacum	a91a5ed5f32001941a172a1b65313ee0	343	Phobius	SIGNAL_PEPTIDE_C_REGION	C-terminal region of a signal peptide.	22	29	-	29-08-2024	-	-
AAA34103_PR2_N.tabacum	a91a5ed5f32001941a172a1b65313ee0	343	Phobius	SIGNAL_PEPTIDE_H_REGION	Hydrophobic region of a signal peptide.	10	21	-	29-08-2024	-	-
Fxa4Dg102296.1	58f3fc23e0ae8398755a03afa01514b5	469	Phobius	NON_CYTOPLASMIC_DOMAIN	Region of a membrane-bound protein predicted to be outside the membrane, in the extracellular region.	467	469	-	29-08-2024	-	-
Fxa4Dg102296.1	58f3fc23e0ae8398755a03afa01514b5	469	MobiDBLite	mobidb-lite	consensus disorder prediction	390	420	-	29-08-2024	-	-
Fxa4Dg102296.1	58f3fc23e0ae8398755a03afa01514b5	469	Phobius	CYTOPLASMIC_DOMAIN	Region of a membrane-bound protein predicted to be outside the membrane, in the cytoplasm.	1	445	-	29-08-2024	-	-
Fxa4Dg102296.1	58f3fc23e0ae8398755a03afa01514b5	469	Phobius	TRANSMEMBRANE	Region of a membrane-bound protein predicted to be embedded in the membrane.	446	466	-	29-08-2024	-	-
Fxa4Dg102296.1	58f3fc23e0ae8398755a03afa01514b5	469	Pfam	PF00332	Glycosyl hydrolases family 17	60	367	9.5e-67	29-08-2024	IPR000490	Glycoside hydrolase family 17
Fxa4Dg102296.1	58f3fc23e0ae8398755a03afa01514b5	469	MobiDBLite	mobidb-lite	consensus disorder prediction	375	420	-	29-08-2024	-	-
unannotated:chr7B_12020522-12020781_frame6	2cc4c4bc6ce01cb8308fa3d83ad3cba6	87	Pfam	PF00332	Glycosyl hydrolases family 17	1	86	2e-08	29-08-2024	IPR000490	Glycoside hydrolase family 17
Fxa3Ag102742.1	d614b2ac0a9526bd6a24609f4242d6ae	237	Pfam	PF00332	Glycosyl hydrolases family 17	1	236	1.1e-63	29-08-2024	IPR000490	Glycoside hydrolase family 17
Fxa3Ag103689.1	f5383f0d11d3c220bd786bb435200c42	482	Phobius	SIGNAL_PEPTIDE_H_REGION	Hydrophobic region of a signal peptide.	4	14	-	29-08-2024	-	-
Fxa3Ag103689.1	f5383f0d11d3c220bd786bb435200c42	482	Phobius	SIGNAL_PEPTIDE_N_REGION	N-terminal region of a signal peptide.	1	3	-	29-08-2024	-	-
Fxa3Ag103689.1	f5383f0d11d3c220bd786bb435200c42	482	Pfam	PF07983	X8 domain	365	432	2.3e-12	29-08-2024	IPR012946	X8 domain
Fxa3Ag103689.1	f5383f0d11d3c220bd786bb435200c42	482	Phobius	CYTOPLASMIC_DOMAIN	Region of a membrane-bound protein predicted to be outside the membrane, in the cytoplasm.	479	482	-	29-08-2024	-	-
Fxa3Ag103689.1	f5383f0d11d3c220bd786bb435200c42	482	Pfam	PF00332	Glycosyl hydrolases family 17	22	345	1.5e-61	29-08-2024	IPR000490	Glycoside hydrolase family 17
Fxa3Ag103689.1	f5383f0d11d3c220bd786bb435200c42	482	Phobius	SIGNAL_PEPTIDE	Signal peptide region	1	21	-	29-08-2024	-	-
Fxa3Ag103689.1	f5383f0d11d3c220bd786bb435200c42	482	Phobius	TRANSMEMBRANE	Region of a membrane-bound protein predicted to be embedded in the membrane.	458	478	-	29-08-2024	-	-
Fxa3Ag103689.1	f5383f0d11d3c220bd786bb435200c42	482	Phobius	SIGNAL_PEPTIDE_C_REGION	C-terminal region of a signal peptide.	15	21	-	29-08-2024	-	-
Fxa3Ag103689.1	f5383f0d11d3c220bd786bb435200c42	482	Phobius	NON_CYTOPLASMIC_DOMAIN	Region of a membrane-bound protein predicted to be outside the membrane, in the extracellular region.	22	457	-	29-08-2024	-	-
Fxa1Ag102106.1	2fcf67b85a8e0c711c1a7739ab188f39	467	Phobius	NON_CYTOPLASMIC_DOMAIN	Region of a membrane-bound protein predicted to be outside the membrane, in the extracellular region.	26	467	-	29-08-2024	-	-
Fxa1Ag102106.1	2fcf67b85a8e0c711c1a7739ab188f39	467	Phobius	SIGNAL_PEPTIDE_N_REGION	N-terminal region of a signal peptide.	1	3	-	29-08-2024	-	-
Fxa1Ag102106.1	2fcf67b85a8e0c711c1a7739ab188f39	467	Phobius	SIGNAL_PEPTIDE	Signal peptide region	1	25	-	29-08-2024	-	-
Fxa1Ag102106.1	2fcf67b85a8e0c711c1a7739ab188f39	467	Pfam	PF00332	Glycosyl hydrolases family 17	26	333	9.6e-58	29-08-2024	IPR000490	Glycoside hydrolase family 17
Fxa1Ag102106.1	2fcf67b85a8e0c711c1a7739ab188f39	467	Phobius	SIGNAL_PEPTIDE_C_REGION	C-terminal region of a signal peptide.	18	25	-	29-08-2024	-	-
Fxa1Ag102106.1	2fcf67b85a8e0c711c1a7739ab188f39	467	Phobius	SIGNAL_PEPTIDE_H_REGION	Hydrophobic region of a signal peptide.	4	17	-	29-08-2024	-	-
Fxa1Ag102106.1	2fcf67b85a8e0c711c1a7739ab188f39	467	Pfam	PF07983	X8 domain	365	422	8.7e-05	29-08-2024	IPR012946	X8 domain
Fxa6Cg103590.1	52019158f5615dab02c641f7e3a64dba	467	Phobius	NON_CYTOPLASMIC_DOMAIN	Region of a membrane-bound protein predicted to be outside the membrane, in the extracellular region.	23	467	-	29-08-2024	-	-
Fxa6Cg103590.1	52019158f5615dab02c641f7e3a64dba	467	Pfam	PF00332	Glycosyl hydrolases family 17	25	344	1.8e-84	29-08-2024	IPR000490	Glycoside hydrolase family 17
Fxa6Cg103590.1	52019158f5615dab02c641f7e3a64dba	467	Pfam	PF07983	X8 domain	387	458	5.6e-20	29-08-2024	IPR012946	X8 domain
Fxa6Cg103590.1	52019158f5615dab02c641f7e3a64dba	467	Phobius	SIGNAL_PEPTIDE_H_REGION	Hydrophobic region of a signal peptide.	6	17	-	29-08-2024	-	-
Fxa6Cg103590.1	52019158f5615dab02c641f7e3a64dba	467	Phobius	SIGNAL_PEPTIDE_C_REGION	C-terminal region of a signal peptide.	18	22	-	29-08-2024	-	-
Fxa6Cg103590.1	52019158f5615dab02c641f7e3a64dba	467	Phobius	SIGNAL_PEPTIDE_N_REGION	N-terminal region of a signal peptide.	1	5	-	29-08-2024	-	-
Fxa6Cg103590.1	52019158f5615dab02c641f7e3a64dba	467	Phobius	SIGNAL_PEPTIDE	Signal peptide region	1	22	-	29-08-2024	-	-
Fxa1Cg100525.1	7cd6c39d7c928ac7514386b19ddc618c	596	Phobius	SIGNAL_PEPTIDE	Signal peptide region	1	23	-	29-08-2024	-	-
Fxa1Cg100525.1	7cd6c39d7c928ac7514386b19ddc618c	596	Pfam	PF00332	Glycosyl hydrolases family 17	26	344	1.1e-88	29-08-2024	IPR000490	Glycoside hydrolase family 17
Fxa1Cg100525.1	7cd6c39d7c928ac7514386b19ddc618c	596	Phobius	SIGNAL_PEPTIDE_N_REGION	N-terminal region of a signal peptide.	1	6	-	29-08-2024	-	-
Fxa1Cg100525.1	7cd6c39d7c928ac7514386b19ddc618c	596	Phobius	SIGNAL_PEPTIDE_C_REGION	C-terminal region of a signal peptide.	19	23	-	29-08-2024	-	-
Fxa1Cg100525.1	7cd6c39d7c928ac7514386b19ddc618c	596	Phobius	NON_CYTOPLASMIC_DOMAIN	Region of a membrane-bound protein predicted to be outside the membrane, in the extracellular region.	24	596	-	29-08-2024	-	-
Fxa1Cg100525.1	7cd6c39d7c928ac7514386b19ddc618c	596	Pfam	PF07983	X8 domain	365	436	6.6e-18	29-08-2024	IPR012946	X8 domain
Fxa1Cg100525.1	7cd6c39d7c928ac7514386b19ddc618c	596	Phobius	SIGNAL_PEPTIDE_H_REGION	Hydrophobic region of a signal peptide.	7	18	-	29-08-2024	-	-
Fxa7Ag202223.1	1c0f1ed865992c029cc911db9da30461	1010	Pfam	PF07983	X8 domain	363	432	8.2e-17	29-08-2024	IPR012946	X8 domain
Fxa7Ag202223.1	1c0f1ed865992c029cc911db9da30461	1010	Pfam	PF07983	X8 domain	804	873	2.6e-09	29-08-2024	IPR012946	X8 domain
Fxa7Ag202223.1	1c0f1ed865992c029cc911db9da30461	1010	Pfam	PF07983	X8 domain	461	530	1.9e-11	29-08-2024	IPR012946	X8 domain
Fxa7Ag202223.1	1c0f1ed865992c029cc911db9da30461	1010	Pfam	PF07983	X8 domain	926	994	2.1e-17	29-08-2024	IPR012946	X8 domain
Fxa7Ag202223.1	1c0f1ed865992c029cc911db9da30461	1010	Pfam	PF07983	X8 domain	681	750	1.2e-10	29-08-2024	IPR012946	X8 domain
Fxa7Ag202223.1	1c0f1ed865992c029cc911db9da30461	1010	Pfam	PF07983	X8 domain	570	640	2.5e-14	29-08-2024	IPR012946	X8 domain
Fxa7Ag202223.1	1c0f1ed865992c029cc911db9da30461	1010	Phobius	NON_CYTOPLASMIC_DOMAIN	Region of a membrane-bound protein predicted to be outside the membrane, in the extracellular region.	21	1010	-	29-08-2024	-	-
Fxa7Ag202223.1	1c0f1ed865992c029cc911db9da30461	1010	Pfam	PF00332	Glycosyl hydrolases family 17	21	329	5.5e-75	29-08-2024	IPR000490	Glycoside hydrolase family 17
Fxa7Ag202223.1	1c0f1ed865992c029cc911db9da30461	1010	Phobius	SIGNAL_PEPTIDE	Signal peptide region	1	20	-	29-08-2024	-	-
Fxa7Ag202223.1	1c0f1ed865992c029cc911db9da30461	1010	Phobius	SIGNAL_PEPTIDE_N_REGION	N-terminal region of a signal peptide.	1	4	-	29-08-2024	-	-
Fxa7Ag202223.1	1c0f1ed865992c029cc911db9da30461	1010	Phobius	SIGNAL_PEPTIDE_H_REGION	Hydrophobic region of a signal peptide.	5	15	-	29-08-2024	-	-
Fxa7Ag202223.1	1c0f1ed865992c029cc911db9da30461	1010	MobiDBLite	mobidb-lite	consensus disorder prediction	537	566	-	29-08-2024	-	-
Fxa7Ag202223.1	1c0f1ed865992c029cc911db9da30461	1010	Phobius	SIGNAL_PEPTIDE_C_REGION	C-terminal region of a signal peptide.	16	20	-	29-08-2024	-	-
Fxa7Ag202223.1	1c0f1ed865992c029cc911db9da30461	1010	MobiDBLite	mobidb-lite	consensus disorder prediction	655	680	-	29-08-2024	-	-
Fxa3Ag101050.1	75422c94412602f0c36476d0386a9a71	174	Pfam	PF00332	Glycosyl hydrolases family 17	28	170	2.5e-31	29-08-2024	IPR000490	Glycoside hydrolase family 17
Fxa5Dg202181.1	e36abc881ff1c22ebdb459269b19b3c5	470	Pfam	PF07983	X8 domain	383	453	6.5e-17	29-08-2024	IPR012946	X8 domain
Fxa5Dg202181.1	e36abc881ff1c22ebdb459269b19b3c5	470	Phobius	SIGNAL_PEPTIDE_N_REGION	N-terminal region of a signal peptide.	1	3	-	29-08-2024	-	-
Fxa5Dg202181.1	e36abc881ff1c22ebdb459269b19b3c5	470	Phobius	SIGNAL_PEPTIDE_H_REGION	Hydrophobic region of a signal peptide.	4	15	-	29-08-2024	-	-
Fxa5Dg202181.1	e36abc881ff1c22ebdb459269b19b3c5	470	Phobius	NON_CYTOPLASMIC_DOMAIN	Region of a membrane-bound protein predicted to be outside the membrane, in the extracellular region.	25	470	-	29-08-2024	-	-
Fxa5Dg202181.1	e36abc881ff1c22ebdb459269b19b3c5	470	Pfam	PF00332	Glycosyl hydrolases family 17	26	351	7.1e-79	29-08-2024	IPR000490	Glycoside hydrolase family 17
Fxa5Dg202181.1	e36abc881ff1c22ebdb459269b19b3c5	470	Phobius	SIGNAL_PEPTIDE	Signal peptide region	1	24	-	29-08-2024	-	-
Fxa5Dg202181.1	e36abc881ff1c22ebdb459269b19b3c5	470	Phobius	SIGNAL_PEPTIDE_C_REGION	C-terminal region of a signal peptide.	16	24	-	29-08-2024	-	-
Fxa3Dg202068.1	0028bf2fd3076d07b87dd4e40718b6cd	385	Pfam	PF00332	Glycosyl hydrolases family 17	33	348	3.4e-84	29-08-2024	IPR000490	Glycoside hydrolase family 17
Fxa3Dg202068.1	0028bf2fd3076d07b87dd4e40718b6cd	385	Phobius	SIGNAL_PEPTIDE_N_REGION	N-terminal region of a signal peptide.	1	6	-	29-08-2024	-	-
Fxa3Dg202068.1	0028bf2fd3076d07b87dd4e40718b6cd	385	Phobius	TRANSMEMBRANE	Region of a membrane-bound protein predicted to be embedded in the membrane.	366	384	-	29-08-2024	-	-
Fxa3Dg202068.1	0028bf2fd3076d07b87dd4e40718b6cd	385	Phobius	SIGNAL_PEPTIDE_H_REGION	Hydrophobic region of a signal peptide.	7	17	-	29-08-2024	-	-
Fxa3Dg202068.1	0028bf2fd3076d07b87dd4e40718b6cd	385	Phobius	SIGNAL_PEPTIDE_C_REGION	C-terminal region of a signal peptide.	18	22	-	29-08-2024	-	-
Fxa3Dg202068.1	0028bf2fd3076d07b87dd4e40718b6cd	385	Phobius	CYTOPLASMIC_DOMAIN	Region of a membrane-bound protein predicted to be outside the membrane, in the cytoplasm.	385	385	-	29-08-2024	-	-
Fxa3Dg202068.1	0028bf2fd3076d07b87dd4e40718b6cd	385	Phobius	SIGNAL_PEPTIDE	Signal peptide region	1	22	-	29-08-2024	-	-
Fxa3Dg202068.1	0028bf2fd3076d07b87dd4e40718b6cd	385	Phobius	NON_CYTOPLASMIC_DOMAIN	Region of a membrane-bound protein predicted to be outside the membrane, in the extracellular region.	23	365	-	29-08-2024	-	-
Fxa4Ag101382.1	ed5aa48373230fa3c972e47d1cc8e816	83	Phobius	CYTOPLASMIC_DOMAIN	Region of a membrane-bound protein predicted to be outside the membrane, in the cytoplasm.	75	83	-	29-08-2024	-	-
Fxa4Ag101382.1	ed5aa48373230fa3c972e47d1cc8e816	83	Phobius	CYTOPLASMIC_DOMAIN	Region of a membrane-bound protein predicted to be outside the membrane, in the cytoplasm.	1	11	-	29-08-2024	-	-
Fxa4Ag101382.1	ed5aa48373230fa3c972e47d1cc8e816	83	Phobius	NON_CYTOPLASMIC_DOMAIN	Region of a membrane-bound protein predicted to be outside the membrane, in the extracellular region.	35	53	-	29-08-2024	-	-
Fxa4Ag101382.1	ed5aa48373230fa3c972e47d1cc8e816	83	Phobius	TRANSMEMBRANE	Region of a membrane-bound protein predicted to be embedded in the membrane.	54	74	-	29-08-2024	-	-
Fxa4Ag101382.1	ed5aa48373230fa3c972e47d1cc8e816	83	Phobius	TRANSMEMBRANE	Region of a membrane-bound protein predicted to be embedded in the membrane.	12	34	-	29-08-2024	-	-
Fxa1Dg200248.1	10baea21b41f6c910ae77ade6f784363	415	Phobius	SIGNAL_PEPTIDE	Signal peptide region	1	24	-	29-08-2024	-	-
Fxa1Dg200248.1	10baea21b41f6c910ae77ade6f784363	415	Phobius	SIGNAL_PEPTIDE_H_REGION	Hydrophobic region of a signal peptide.	6	17	-	29-08-2024	-	-
Fxa1Dg200248.1	10baea21b41f6c910ae77ade6f784363	415	Phobius	SIGNAL_PEPTIDE_C_REGION	C-terminal region of a signal peptide.	18	24	-	29-08-2024	-	-
Fxa1Dg200248.1	10baea21b41f6c910ae77ade6f784363	415	Phobius	SIGNAL_PEPTIDE_N_REGION	N-terminal region of a signal peptide.	1	5	-	29-08-2024	-	-
Fxa1Dg200248.1	10baea21b41f6c910ae77ade6f784363	415	Phobius	NON_CYTOPLASMIC_DOMAIN	Region of a membrane-bound protein predicted to be outside the membrane, in the extracellular region.	25	415	-	29-08-2024	-	-
Fxa1Dg200248.1	10baea21b41f6c910ae77ade6f784363	415	Pfam	PF00332	Glycosyl hydrolases family 17	30	349	6.2e-75	29-08-2024	IPR000490	Glycoside hydrolase family 17
Fxa4Bg100005.1	10fe1009263d0627e4e3c726a9766aa4	506	Phobius	NON_CYTOPLASMIC_DOMAIN	Region of a membrane-bound protein predicted to be outside the membrane, in the extracellular region.	506	506	-	29-08-2024	-	-
Fxa4Bg100005.1	10fe1009263d0627e4e3c726a9766aa4	506	Phobius	CYTOPLASMIC_DOMAIN	Region of a membrane-bound protein predicted to be outside the membrane, in the cytoplasm.	48	486	-	29-08-2024	-	-
Fxa4Bg100005.1	10fe1009263d0627e4e3c726a9766aa4	506	Phobius	TRANSMEMBRANE	Region of a membrane-bound protein predicted to be embedded in the membrane.	25	47	-	29-08-2024	-	-
Fxa4Bg100005.1	10fe1009263d0627e4e3c726a9766aa4	506	Pfam	PF07983	X8 domain	384	453	7e-11	29-08-2024	IPR012946	X8 domain
Fxa4Bg100005.1	10fe1009263d0627e4e3c726a9766aa4	506	Pfam	PF00332	Glycosyl hydrolases family 17	45	363	1.1e-62	29-08-2024	IPR000490	Glycoside hydrolase family 17
Fxa4Bg100005.1	10fe1009263d0627e4e3c726a9766aa4	506	Phobius	NON_CYTOPLASMIC_DOMAIN	Region of a membrane-bound protein predicted to be outside the membrane, in the extracellular region.	1	24	-	29-08-2024	-	-
Fxa4Bg100005.1	10fe1009263d0627e4e3c726a9766aa4	506	Phobius	TRANSMEMBRANE	Region of a membrane-bound protein predicted to be embedded in the membrane.	487	505	-	29-08-2024	-	-
Fxa5Ag202332.1	a472f132ffe66bdcf7526ce945d33fe8	469	Phobius	SIGNAL_PEPTIDE_C_REGION	C-terminal region of a signal peptide.	15	23	-	29-08-2024	-	-
Fxa5Ag202332.1	a472f132ffe66bdcf7526ce945d33fe8	469	Phobius	SIGNAL_PEPTIDE	Signal peptide region	1	23	-	29-08-2024	-	-
Fxa5Ag202332.1	a472f132ffe66bdcf7526ce945d33fe8	469	Pfam	PF07983	X8 domain	382	452	1.1e-16	29-08-2024	IPR012946	X8 domain
Fxa5Ag202332.1	a472f132ffe66bdcf7526ce945d33fe8	469	Pfam	PF00332	Glycosyl hydrolases family 17	25	350	2.6e-78	29-08-2024	IPR000490	Glycoside hydrolase family 17
Fxa5Ag202332.1	a472f132ffe66bdcf7526ce945d33fe8	469	Phobius	SIGNAL_PEPTIDE_N_REGION	N-terminal region of a signal peptide.	1	2	-	29-08-2024	-	-
Fxa5Ag202332.1	a472f132ffe66bdcf7526ce945d33fe8	469	Phobius	SIGNAL_PEPTIDE_H_REGION	Hydrophobic region of a signal peptide.	3	14	-	29-08-2024	-	-
Fxa5Ag202332.1	a472f132ffe66bdcf7526ce945d33fe8	469	Phobius	NON_CYTOPLASMIC_DOMAIN	Region of a membrane-bound protein predicted to be outside the membrane, in the extracellular region.	24	469	-	29-08-2024	-	-
Fxa1Dg200754.1	08237a3a809806c4464772b0ad6800bd	500	Phobius	NON_CYTOPLASMIC_DOMAIN	Region of a membrane-bound protein predicted to be outside the membrane, in the extracellular region.	22	480	-	29-08-2024	-	-
Fxa1Dg200754.1	08237a3a809806c4464772b0ad6800bd	500	Pfam	PF00332	Glycosyl hydrolases family 17	27	344	4.7e-57	29-08-2024	IPR000490	Glycoside hydrolase family 17
Fxa1Dg200754.1	08237a3a809806c4464772b0ad6800bd	500	Phobius	SIGNAL_PEPTIDE_H_REGION	Hydrophobic region of a signal peptide.	6	13	-	29-08-2024	-	-
Fxa1Dg200754.1	08237a3a809806c4464772b0ad6800bd	500	Phobius	CYTOPLASMIC_DOMAIN	Region of a membrane-bound protein predicted to be outside the membrane, in the cytoplasm.	500	500	-	29-08-2024	-	-
Fxa1Dg200754.1	08237a3a809806c4464772b0ad6800bd	500	Phobius	SIGNAL_PEPTIDE_C_REGION	C-terminal region of a signal peptide.	14	21	-	29-08-2024	-	-
Fxa1Dg200754.1	08237a3a809806c4464772b0ad6800bd	500	Phobius	SIGNAL_PEPTIDE	Signal peptide region	1	21	-	29-08-2024	-	-
Fxa1Dg200754.1	08237a3a809806c4464772b0ad6800bd	500	Pfam	PF07983	X8 domain	363	432	5.5e-11	29-08-2024	IPR012946	X8 domain
Fxa1Dg200754.1	08237a3a809806c4464772b0ad6800bd	500	Phobius	SIGNAL_PEPTIDE_N_REGION	N-terminal region of a signal peptide.	1	5	-	29-08-2024	-	-
Fxa1Dg200754.1	08237a3a809806c4464772b0ad6800bd	500	Phobius	TRANSMEMBRANE	Region of a membrane-bound protein predicted to be embedded in the membrane.	481	499	-	29-08-2024	-	-
Fxa3Dg200136.2	1fdeb6b251cd22270a72f7096b59c715	534	Phobius	TRANSMEMBRANE	Region of a membrane-bound protein predicted to be embedded in the membrane.	512	531	-	29-08-2024	-	-
Fxa3Dg200136.2	1fdeb6b251cd22270a72f7096b59c715	534	Phobius	SIGNAL_PEPTIDE_N_REGION	N-terminal region of a signal peptide.	1	12	-	29-08-2024	-	-
Fxa3Dg200136.2	1fdeb6b251cd22270a72f7096b59c715	534	Pfam	PF07983	X8 domain	390	461	1.7e-19	29-08-2024	IPR012946	X8 domain
Fxa3Dg200136.2	1fdeb6b251cd22270a72f7096b59c715	534	Phobius	SIGNAL_PEPTIDE_C_REGION	C-terminal region of a signal peptide.	25	32	-	29-08-2024	-	-
Fxa3Dg200136.2	1fdeb6b251cd22270a72f7096b59c715	534	Phobius	NON_CYTOPLASMIC_DOMAIN	Region of a membrane-bound protein predicted to be outside the membrane, in the extracellular region.	33	511	-	29-08-2024	-	-
Fxa3Dg200136.2	1fdeb6b251cd22270a72f7096b59c715	534	Pfam	PF00332	Glycosyl hydrolases family 17	53	372	7.3e-67	29-08-2024	IPR000490	Glycoside hydrolase family 17
Fxa3Dg200136.2	1fdeb6b251cd22270a72f7096b59c715	534	Phobius	CYTOPLASMIC_DOMAIN	Region of a membrane-bound protein predicted to be outside the membrane, in the cytoplasm.	532	534	-	29-08-2024	-	-
Fxa3Dg200136.2	1fdeb6b251cd22270a72f7096b59c715	534	Phobius	SIGNAL_PEPTIDE	Signal peptide region	1	32	-	29-08-2024	-	-
Fxa3Dg200136.2	1fdeb6b251cd22270a72f7096b59c715	534	Phobius	SIGNAL_PEPTIDE_H_REGION	Hydrophobic region of a signal peptide.	13	24	-	29-08-2024	-	-
Fxa1Bg201472.1	dceb7de7c835aefc5d1e84d03ec0865b	398	Phobius	NON_CYTOPLASMIC_DOMAIN	Region of a membrane-bound protein predicted to be outside the membrane, in the extracellular region.	26	398	-	29-08-2024	-	-
Fxa1Bg201472.1	dceb7de7c835aefc5d1e84d03ec0865b	398	Phobius	SIGNAL_PEPTIDE_H_REGION	Hydrophobic region of a signal peptide.	5	17	-	29-08-2024	-	-
Fxa1Bg201472.1	dceb7de7c835aefc5d1e84d03ec0865b	398	MobiDBLite	mobidb-lite	consensus disorder prediction	203	274	-	29-08-2024	-	-
Fxa1Bg201472.1	dceb7de7c835aefc5d1e84d03ec0865b	398	Phobius	SIGNAL_PEPTIDE	Signal peptide region	1	25	-	29-08-2024	-	-
Fxa1Bg201472.1	dceb7de7c835aefc5d1e84d03ec0865b	398	Pfam	PF07983	X8 domain	311	383	6.6e-20	29-08-2024	IPR012946	X8 domain
Fxa1Bg201472.1	dceb7de7c835aefc5d1e84d03ec0865b	398	Phobius	SIGNAL_PEPTIDE_N_REGION	N-terminal region of a signal peptide.	1	4	-	29-08-2024	-	-
Fxa1Bg201472.1	dceb7de7c835aefc5d1e84d03ec0865b	398	Pfam	PF00332	Glycosyl hydrolases family 17	33	162	3.3e-07	29-08-2024	IPR000490	Glycoside hydrolase family 17
Fxa1Bg201472.1	dceb7de7c835aefc5d1e84d03ec0865b	398	Phobius	SIGNAL_PEPTIDE_C_REGION	C-terminal region of a signal peptide.	18	25	-	29-08-2024	-	-
Fxa1Bg201472.1	dceb7de7c835aefc5d1e84d03ec0865b	398	MobiDBLite	mobidb-lite	consensus disorder prediction	225	256	-	29-08-2024	-	-
Fxa3Ag102387.1	826e9378d9a124633700ce8124f92183	381	Pfam	PF00332	Glycosyl hydrolases family 17	29	344	2.1e-84	29-08-2024	IPR000490	Glycoside hydrolase family 17
Fxa3Ag102387.1	826e9378d9a124633700ce8124f92183	381	Phobius	NON_CYTOPLASMIC_DOMAIN	Region of a membrane-bound protein predicted to be outside the membrane, in the extracellular region.	1	361	-	29-08-2024	-	-
Fxa3Ag102387.1	826e9378d9a124633700ce8124f92183	381	Phobius	TRANSMEMBRANE	Region of a membrane-bound protein predicted to be embedded in the membrane.	362	380	-	29-08-2024	-	-
Fxa3Ag102387.1	826e9378d9a124633700ce8124f92183	381	Phobius	CYTOPLASMIC_DOMAIN	Region of a membrane-bound protein predicted to be outside the membrane, in the cytoplasm.	381	381	-	29-08-2024	-	-
Fxa4Bg103064.3	ca6f6733a472918a0cc491e1fb4c85c6	500	Pfam	PF07983	X8 domain	361	432	4.2e-17	29-08-2024	IPR012946	X8 domain
Fxa4Bg103064.3	ca6f6733a472918a0cc491e1fb4c85c6	500	Phobius	SIGNAL_PEPTIDE_H_REGION	Hydrophobic region of a signal peptide.	4	15	-	29-08-2024	-	-
Fxa4Bg103064.3	ca6f6733a472918a0cc491e1fb4c85c6	500	Phobius	SIGNAL_PEPTIDE_N_REGION	N-terminal region of a signal peptide.	1	3	-	29-08-2024	-	-
Fxa4Bg103064.3	ca6f6733a472918a0cc491e1fb4c85c6	500	Phobius	TRANSMEMBRANE	Region of a membrane-bound protein predicted to be embedded in the membrane.	476	499	-	29-08-2024	-	-
Fxa4Bg103064.3	ca6f6733a472918a0cc491e1fb4c85c6	500	Phobius	SIGNAL_PEPTIDE	Signal peptide region	1	20	-	29-08-2024	-	-
Fxa4Bg103064.3	ca6f6733a472918a0cc491e1fb4c85c6	500	Phobius	CYTOPLASMIC_DOMAIN	Region of a membrane-bound protein predicted to be outside the membrane, in the cytoplasm.	500	500	-	29-08-2024	-	-
Fxa4Bg103064.3	ca6f6733a472918a0cc491e1fb4c85c6	500	Phobius	SIGNAL_PEPTIDE_C_REGION	C-terminal region of a signal peptide.	16	20	-	29-08-2024	-	-
Fxa4Bg103064.3	ca6f6733a472918a0cc491e1fb4c85c6	500	Pfam	PF00332	Glycosyl hydrolases family 17	24	344	8.7e-75	29-08-2024	IPR000490	Glycoside hydrolase family 17
Fxa4Bg103064.3	ca6f6733a472918a0cc491e1fb4c85c6	500	Phobius	NON_CYTOPLASMIC_DOMAIN	Region of a membrane-bound protein predicted to be outside the membrane, in the extracellular region.	21	475	-	29-08-2024	-	-
Fxa2Cg202663.1	7a9434f7ea86e84d868a3ca3d45cf424	463	Pfam	PF07983	X8 domain	374	444	8.2e-16	29-08-2024	IPR012946	X8 domain
Fxa2Cg202663.1	7a9434f7ea86e84d868a3ca3d45cf424	463	Phobius	SIGNAL_PEPTIDE_H_REGION	Hydrophobic region of a signal peptide.	3	15	-	29-08-2024	-	-
Fxa2Cg202663.1	7a9434f7ea86e84d868a3ca3d45cf424	463	Phobius	SIGNAL_PEPTIDE_N_REGION	N-terminal region of a signal peptide.	1	2	-	29-08-2024	-	-
Fxa2Cg202663.1	7a9434f7ea86e84d868a3ca3d45cf424	463	Phobius	SIGNAL_PEPTIDE	Signal peptide region	1	20	-	29-08-2024	-	-
Fxa2Cg202663.1	7a9434f7ea86e84d868a3ca3d45cf424	463	Phobius	NON_CYTOPLASMIC_DOMAIN	Region of a membrane-bound protein predicted to be outside the membrane, in the extracellular region.	21	463	-	29-08-2024	-	-
Fxa2Cg202663.1	7a9434f7ea86e84d868a3ca3d45cf424	463	Phobius	SIGNAL_PEPTIDE_C_REGION	C-terminal region of a signal peptide.	16	20	-	29-08-2024	-	-
Fxa2Cg202663.1	7a9434f7ea86e84d868a3ca3d45cf424	463	Pfam	PF00332	Glycosyl hydrolases family 17	26	347	4.9e-93	29-08-2024	IPR000490	Glycoside hydrolase family 17
Fxa1Cg102102.1	df9b0bbac2173b0f3801c034a6402ebf	158	Pfam	PF00332	Glycosyl hydrolases family 17	17	152	7.6e-22	29-08-2024	IPR000490	Glycoside hydrolase family 17
Fxa1Ag100759.1	6ca422c94ad19ca4bebecfa43c9d99e6	97	Pfam	PF00332	Glycosyl hydrolases family 17	1	87	2.2e-07	29-08-2024	IPR000490	Glycoside hydrolase family 17
Fxa6Ag103580.1	1d11f5bde324ad1f0f6b619bcadcf29c	324	Pfam	PF00332	Glycosyl hydrolases family 17	11	318	1.1e-102	29-08-2024	IPR000490	Glycoside hydrolase family 17
Fxa1Cg100237.3	70e2d859ba7bd73ae34ec6ee064d4839	375	Pfam	PF00332	Glycosyl hydrolases family 17	18	337	9.5e-76	29-08-2024	IPR000490	Glycoside hydrolase family 17
Fxa1Cg100445.1	0684f43448600360833696b31f752178	518	Pfam	PF07983	X8 domain	373	441	1.3e-11	29-08-2024	IPR012946	X8 domain
Fxa1Cg100445.1	0684f43448600360833696b31f752178	518	Phobius	SIGNAL_PEPTIDE_H_REGION	Hydrophobic region of a signal peptide.	12	23	-	29-08-2024	-	-
Fxa1Cg100445.1	0684f43448600360833696b31f752178	518	Phobius	NON_CYTOPLASMIC_DOMAIN	Region of a membrane-bound protein predicted to be outside the membrane, in the extracellular region.	32	518	-	29-08-2024	-	-
Fxa1Cg100445.1	0684f43448600360833696b31f752178	518	Phobius	SIGNAL_PEPTIDE	Signal peptide region	1	31	-	29-08-2024	-	-
Fxa1Cg100445.1	0684f43448600360833696b31f752178	518	Pfam	PF00332	Glycosyl hydrolases family 17	31	350	8.7e-55	29-08-2024	IPR000490	Glycoside hydrolase family 17
Fxa1Cg100445.1	0684f43448600360833696b31f752178	518	Phobius	SIGNAL_PEPTIDE_N_REGION	N-terminal region of a signal peptide.	1	11	-	29-08-2024	-	-
Fxa1Cg100445.1	0684f43448600360833696b31f752178	518	Phobius	SIGNAL_PEPTIDE_C_REGION	C-terminal region of a signal peptide.	24	31	-	29-08-2024	-	-
Fxa2Bg202849.1	a2bea11644f291a2e1d67f6258276af4	482	Phobius	TRANSMEMBRANE	Region of a membrane-bound protein predicted to be embedded in the membrane.	465	481	-	29-08-2024	-	-
Fxa2Bg202849.1	a2bea11644f291a2e1d67f6258276af4	482	Pfam	PF00332	Glycosyl hydrolases family 17	24	342	2.1e-62	29-08-2024	IPR000490	Glycoside hydrolase family 17
Fxa2Bg202849.1	a2bea11644f291a2e1d67f6258276af4	482	Phobius	SIGNAL_PEPTIDE	Signal peptide region	1	23	-	29-08-2024	-	-
Fxa2Bg202849.1	a2bea11644f291a2e1d67f6258276af4	482	Phobius	SIGNAL_PEPTIDE_N_REGION	N-terminal region of a signal peptide.	1	6	-	29-08-2024	-	-
Fxa2Bg202849.1	a2bea11644f291a2e1d67f6258276af4	482	Phobius	SIGNAL_PEPTIDE_C_REGION	C-terminal region of a signal peptide.	19	23	-	29-08-2024	-	-
Fxa2Bg202849.1	a2bea11644f291a2e1d67f6258276af4	482	Pfam	PF07983	X8 domain	361	430	8.5e-10	29-08-2024	IPR012946	X8 domain
Fxa2Bg202849.1	a2bea11644f291a2e1d67f6258276af4	482	Phobius	CYTOPLASMIC_DOMAIN	Region of a membrane-bound protein predicted to be outside the membrane, in the cytoplasm.	482	482	-	29-08-2024	-	-
Fxa2Bg202849.1	a2bea11644f291a2e1d67f6258276af4	482	Phobius	SIGNAL_PEPTIDE_H_REGION	Hydrophobic region of a signal peptide.	7	18	-	29-08-2024	-	-
Fxa2Bg202849.1	a2bea11644f291a2e1d67f6258276af4	482	Phobius	NON_CYTOPLASMIC_DOMAIN	Region of a membrane-bound protein predicted to be outside the membrane, in the extracellular region.	24	464	-	29-08-2024	-	-
Fxa5Bg100862.1	915537327135d6434bef7cb683867926	493	Pfam	PF00332	Glycosyl hydrolases family 17	102	420	5.1e-82	29-08-2024	IPR000490	Glycoside hydrolase family 17
Fxa5Bg100862.1	915537327135d6434bef7cb683867926	493	Phobius	CYTOPLASMIC_DOMAIN	Region of a membrane-bound protein predicted to be outside the membrane, in the cytoplasm.	493	493	-	29-08-2024	-	-
Fxa5Bg100862.1	915537327135d6434bef7cb683867926	493	Phobius	TRANSMEMBRANE	Region of a membrane-bound protein predicted to be embedded in the membrane.	48	67	-	29-08-2024	-	-
Fxa5Bg100862.1	915537327135d6434bef7cb683867926	493	Phobius	TRANSMEMBRANE	Region of a membrane-bound protein predicted to be embedded in the membrane.	474	492	-	29-08-2024	-	-
Fxa5Bg100862.1	915537327135d6434bef7cb683867926	493	Phobius	NON_CYTOPLASMIC_DOMAIN	Region of a membrane-bound protein predicted to be outside the membrane, in the extracellular region.	97	473	-	29-08-2024	-	-
Fxa5Bg100862.1	915537327135d6434bef7cb683867926	493	Phobius	NON_CYTOPLASMIC_DOMAIN	Region of a membrane-bound protein predicted to be outside the membrane, in the extracellular region.	1	47	-	29-08-2024	-	-
Fxa5Bg100862.1	915537327135d6434bef7cb683867926	493	Phobius	CYTOPLASMIC_DOMAIN	Region of a membrane-bound protein predicted to be outside the membrane, in the cytoplasm.	68	78	-	29-08-2024	-	-
Fxa5Bg100862.1	915537327135d6434bef7cb683867926	493	Phobius	TRANSMEMBRANE	Region of a membrane-bound protein predicted to be embedded in the membrane.	79	96	-	29-08-2024	-	-
Fxa5Bg100862.1	915537327135d6434bef7cb683867926	493	MobiDBLite	mobidb-lite	consensus disorder prediction	429	451	-	29-08-2024	-	-
Fxa1Ag101594.1	4455cd6015fe4a49c8fc223cca612727	399	Phobius	SIGNAL_PEPTIDE_H_REGION	Hydrophobic region of a signal peptide.	5	17	-	29-08-2024	-	-
Fxa1Ag101594.1	4455cd6015fe4a49c8fc223cca612727	399	MobiDBLite	mobidb-lite	consensus disorder prediction	202	275	-	29-08-2024	-	-
Fxa1Ag101594.1	4455cd6015fe4a49c8fc223cca612727	399	Phobius	NON_CYTOPLASMIC_DOMAIN	Region of a membrane-bound protein predicted to be outside the membrane, in the extracellular region.	26	399	-	29-08-2024	-	-
Fxa1Ag101594.1	4455cd6015fe4a49c8fc223cca612727	399	Pfam	PF07983	X8 domain	312	384	6.7e-20	29-08-2024	IPR012946	X8 domain
Fxa1Ag101594.1	4455cd6015fe4a49c8fc223cca612727	399	Phobius	SIGNAL_PEPTIDE	Signal peptide region	1	25	-	29-08-2024	-	-
Fxa1Ag101594.1	4455cd6015fe4a49c8fc223cca612727	399	Phobius	SIGNAL_PEPTIDE_N_REGION	N-terminal region of a signal peptide.	1	4	-	29-08-2024	-	-
Fxa1Ag101594.1	4455cd6015fe4a49c8fc223cca612727	399	Pfam	PF00332	Glycosyl hydrolases family 17	32	169	2e-07	29-08-2024	IPR000490	Glycoside hydrolase family 17
Fxa1Ag101594.1	4455cd6015fe4a49c8fc223cca612727	399	Phobius	SIGNAL_PEPTIDE_C_REGION	C-terminal region of a signal peptide.	18	25	-	29-08-2024	-	-
Fxa1Ag101594.1	4455cd6015fe4a49c8fc223cca612727	399	MobiDBLite	mobidb-lite	consensus disorder prediction	225	257	-	29-08-2024	-	-
Fxa3Cg100022.1	7f3b8178b4c31ad4b7d93fe73e2bd891	502	Phobius	SIGNAL_PEPTIDE_N_REGION	N-terminal region of a signal peptide.	1	23	-	29-08-2024	-	-
Fxa3Cg100022.1	7f3b8178b4c31ad4b7d93fe73e2bd891	502	Phobius	SIGNAL_PEPTIDE_H_REGION	Hydrophobic region of a signal peptide.	24	35	-	29-08-2024	-	-
Fxa3Cg100022.1	7f3b8178b4c31ad4b7d93fe73e2bd891	502	Pfam	PF00332	Glycosyl hydrolases family 17	43	361	7e-57	29-08-2024	IPR000490	Glycoside hydrolase family 17
Fxa3Cg100022.1	7f3b8178b4c31ad4b7d93fe73e2bd891	502	Phobius	SIGNAL_PEPTIDE_C_REGION	C-terminal region of a signal peptide.	36	41	-	29-08-2024	-	-
Fxa3Cg100022.1	7f3b8178b4c31ad4b7d93fe73e2bd891	502	Phobius	SIGNAL_PEPTIDE	Signal peptide region	1	41	-	29-08-2024	-	-
Fxa3Cg100022.1	7f3b8178b4c31ad4b7d93fe73e2bd891	502	Pfam	PF07983	X8 domain	382	450	3.5e-12	29-08-2024	IPR012946	X8 domain
Fxa3Cg100022.1	7f3b8178b4c31ad4b7d93fe73e2bd891	502	Phobius	CYTOPLASMIC_DOMAIN	Region of a membrane-bound protein predicted to be outside the membrane, in the cytoplasm.	502	502	-	29-08-2024	-	-
Fxa3Cg100022.1	7f3b8178b4c31ad4b7d93fe73e2bd891	502	Phobius	NON_CYTOPLASMIC_DOMAIN	Region of a membrane-bound protein predicted to be outside the membrane, in the extracellular region.	42	482	-	29-08-2024	-	-
Fxa3Cg100022.1	7f3b8178b4c31ad4b7d93fe73e2bd891	502	Phobius	TRANSMEMBRANE	Region of a membrane-bound protein predicted to be embedded in the membrane.	483	501	-	29-08-2024	-	-
Fxa5Bg100535.1	4e4176770536d6d14ea9a1f347426106	362	Phobius	SIGNAL_PEPTIDE_H_REGION	Hydrophobic region of a signal peptide.	2	9	-	29-08-2024	-	-
Fxa5Bg100535.1	4e4176770536d6d14ea9a1f347426106	362	Phobius	SIGNAL_PEPTIDE_N_REGION	N-terminal region of a signal peptide.	1	1	-	29-08-2024	-	-
Fxa5Bg100535.1	4e4176770536d6d14ea9a1f347426106	362	Phobius	SIGNAL_PEPTIDE_C_REGION	C-terminal region of a signal peptide.	10	14	-	29-08-2024	-	-
Fxa5Bg100535.1	4e4176770536d6d14ea9a1f347426106	362	Pfam	PF00332	Glycosyl hydrolases family 17	48	361	6.8e-102	29-08-2024	IPR000490	Glycoside hydrolase family 17
Fxa5Bg100535.1	4e4176770536d6d14ea9a1f347426106	362	Phobius	NON_CYTOPLASMIC_DOMAIN	Region of a membrane-bound protein predicted to be outside the membrane, in the extracellular region.	15	362	-	29-08-2024	-	-
Fxa5Bg100535.1	4e4176770536d6d14ea9a1f347426106	362	Phobius	SIGNAL_PEPTIDE	Signal peptide region	1	14	-	29-08-2024	-	-
Fxa1Bg200823.1	e2910ab63bc0ff2a713df3983b6df4f1	500	Phobius	SIGNAL_PEPTIDE_N_REGION	N-terminal region of a signal peptide.	1	7	-	29-08-2024	-	-
Fxa1Bg200823.1	e2910ab63bc0ff2a713df3983b6df4f1	500	Pfam	PF00332	Glycosyl hydrolases family 17	27	344	4.9e-56	29-08-2024	IPR000490	Glycoside hydrolase family 17
Fxa1Bg200823.1	e2910ab63bc0ff2a713df3983b6df4f1	500	Phobius	NON_CYTOPLASMIC_DOMAIN	Region of a membrane-bound protein predicted to be outside the membrane, in the extracellular region.	25	480	-	29-08-2024	-	-
Fxa1Bg200823.1	e2910ab63bc0ff2a713df3983b6df4f1	500	Phobius	SIGNAL_PEPTIDE	Signal peptide region	1	24	-	29-08-2024	-	-
Fxa1Bg200823.1	e2910ab63bc0ff2a713df3983b6df4f1	500	Phobius	SIGNAL_PEPTIDE_H_REGION	Hydrophobic region of a signal peptide.	8	19	-	29-08-2024	-	-
Fxa1Bg200823.1	e2910ab63bc0ff2a713df3983b6df4f1	500	Pfam	PF07983	X8 domain	363	432	5.5e-11	29-08-2024	IPR012946	X8 domain
Fxa1Bg200823.1	e2910ab63bc0ff2a713df3983b6df4f1	500	Phobius	CYTOPLASMIC_DOMAIN	Region of a membrane-bound protein predicted to be outside the membrane, in the cytoplasm.	500	500	-	29-08-2024	-	-
Fxa1Bg200823.1	e2910ab63bc0ff2a713df3983b6df4f1	500	Phobius	SIGNAL_PEPTIDE_C_REGION	C-terminal region of a signal peptide.	20	24	-	29-08-2024	-	-
Fxa1Bg200823.1	e2910ab63bc0ff2a713df3983b6df4f1	500	Phobius	TRANSMEMBRANE	Region of a membrane-bound protein predicted to be embedded in the membrane.	481	499	-	29-08-2024	-	-
Fxa6Ag103581.1	098496078c863d061907df532b553308	95	Pfam	PF00332	Glycosyl hydrolases family 17	11	94	4e-14	29-08-2024	IPR000490	Glycoside hydrolase family 17
Fxa4Cg202881.1	fa93c7b461ea49946d4566c38e802302	349	Phobius	SIGNAL_PEPTIDE_H_REGION	Hydrophobic region of a signal peptide.	13	23	-	29-08-2024	-	-
Fxa4Cg202881.1	fa93c7b461ea49946d4566c38e802302	349	Phobius	SIGNAL_PEPTIDE_N_REGION	N-terminal region of a signal peptide.	1	12	-	29-08-2024	-	-
Fxa4Cg202881.1	fa93c7b461ea49946d4566c38e802302	349	Phobius	SIGNAL_PEPTIDE	Signal peptide region	1	31	-	29-08-2024	-	-
Fxa4Cg202881.1	fa93c7b461ea49946d4566c38e802302	349	Phobius	SIGNAL_PEPTIDE_C_REGION	C-terminal region of a signal peptide.	24	31	-	29-08-2024	-	-
Fxa4Cg202881.1	fa93c7b461ea49946d4566c38e802302	349	Phobius	NON_CYTOPLASMIC_DOMAIN	Region of a membrane-bound protein predicted to be outside the membrane, in the extracellular region.	32	349	-	29-08-2024	-	-
Fxa4Cg202881.1	fa93c7b461ea49946d4566c38e802302	349	Pfam	PF00332	Glycosyl hydrolases family 17	36	348	2.9e-78	29-08-2024	IPR000490	Glycoside hydrolase family 17
unannotated:chr3A_19158925-19159154_frame3	6e2ba0303ad7b19c5a89d747cedc84b0	76	Pfam	PF00332	Glycosyl hydrolases family 17	30	76	2e-11	29-08-2024	IPR000490	Glycoside hydrolase family 17
Fxa4Ag103230.1	07878c467ca68cba60a829f5560e5715	506	Phobius	SIGNAL_PEPTIDE_N_REGION	N-terminal region of a signal peptide.	1	7	-	29-08-2024	-	-
Fxa4Ag103230.1	07878c467ca68cba60a829f5560e5715	506	Pfam	PF00332	Glycosyl hydrolases family 17	30	350	1.2e-73	29-08-2024	IPR000490	Glycoside hydrolase family 17
Fxa4Ag103230.1	07878c467ca68cba60a829f5560e5715	506	Phobius	SIGNAL_PEPTIDE	Signal peptide region	1	24	-	29-08-2024	-	-
Fxa4Ag103230.1	07878c467ca68cba60a829f5560e5715	506	Phobius	NON_CYTOPLASMIC_DOMAIN	Region of a membrane-bound protein predicted to be outside the membrane, in the extracellular region.	25	481	-	29-08-2024	-	-
Fxa4Ag103230.1	07878c467ca68cba60a829f5560e5715	506	Phobius	SIGNAL_PEPTIDE_H_REGION	Hydrophobic region of a signal peptide.	8	19	-	29-08-2024	-	-
Fxa4Ag103230.1	07878c467ca68cba60a829f5560e5715	506	Phobius	TRANSMEMBRANE	Region of a membrane-bound protein predicted to be embedded in the membrane.	482	505	-	29-08-2024	-	-
Fxa4Ag103230.1	07878c467ca68cba60a829f5560e5715	506	Phobius	CYTOPLASMIC_DOMAIN	Region of a membrane-bound protein predicted to be outside the membrane, in the cytoplasm.	506	506	-	29-08-2024	-	-
Fxa4Ag103230.1	07878c467ca68cba60a829f5560e5715	506	Phobius	SIGNAL_PEPTIDE_C_REGION	C-terminal region of a signal peptide.	20	24	-	29-08-2024	-	-
Fxa4Ag103230.1	07878c467ca68cba60a829f5560e5715	506	Pfam	PF07983	X8 domain	367	438	1.3e-16	29-08-2024	IPR012946	X8 domain
Fxa7Bg202124.1	3353be95b6ee32d8feee6a8f6cb1c40e	488	Phobius	SIGNAL_PEPTIDE_H_REGION	Hydrophobic region of a signal peptide.	28	38	-	29-08-2024	-	-
Fxa7Bg202124.1	3353be95b6ee32d8feee6a8f6cb1c40e	488	Phobius	SIGNAL_PEPTIDE_C_REGION	C-terminal region of a signal peptide.	39	43	-	29-08-2024	-	-
Fxa7Bg202124.1	3353be95b6ee32d8feee6a8f6cb1c40e	488	Pfam	PF00332	Glycosyl hydrolases family 17	44	353	3.2e-72	29-08-2024	IPR000490	Glycoside hydrolase family 17
Fxa7Bg202124.1	3353be95b6ee32d8feee6a8f6cb1c40e	488	Phobius	NON_CYTOPLASMIC_DOMAIN	Region of a membrane-bound protein predicted to be outside the membrane, in the extracellular region.	44	488	-	29-08-2024	-	-
Fxa7Bg202124.1	3353be95b6ee32d8feee6a8f6cb1c40e	488	Phobius	SIGNAL_PEPTIDE_N_REGION	N-terminal region of a signal peptide.	1	27	-	29-08-2024	-	-
Fxa7Bg202124.1	3353be95b6ee32d8feee6a8f6cb1c40e	488	Phobius	SIGNAL_PEPTIDE	Signal peptide region	1	43	-	29-08-2024	-	-
Fxa7Bg202124.1	3353be95b6ee32d8feee6a8f6cb1c40e	488	Pfam	PF07983	X8 domain	403	472	5.4e-17	29-08-2024	IPR012946	X8 domain
Fxa4Ag101282.1	4ff0894fb38d60218bb1095ea229f0b8	380	Pfam	PF00332	Glycosyl hydrolases family 17	24	353	5.1e-97	29-08-2024	IPR000490	Glycoside hydrolase family 17
Fxa4Ag101282.1	4ff0894fb38d60218bb1095ea229f0b8	380	Phobius	SIGNAL_PEPTIDE_N_REGION	N-terminal region of a signal peptide.	1	3	-	29-08-2024	-	-
Fxa4Ag101282.1	4ff0894fb38d60218bb1095ea229f0b8	380	Phobius	SIGNAL_PEPTIDE_H_REGION	Hydrophobic region of a signal peptide.	4	15	-	29-08-2024	-	-
Fxa4Ag101282.1	4ff0894fb38d60218bb1095ea229f0b8	380	Phobius	NON_CYTOPLASMIC_DOMAIN	Region of a membrane-bound protein predicted to be outside the membrane, in the extracellular region.	23	380	-	29-08-2024	-	-
Fxa4Ag101282.1	4ff0894fb38d60218bb1095ea229f0b8	380	Phobius	SIGNAL_PEPTIDE_C_REGION	C-terminal region of a signal peptide.	16	22	-	29-08-2024	-	-
Fxa4Ag101282.1	4ff0894fb38d60218bb1095ea229f0b8	380	Phobius	SIGNAL_PEPTIDE	Signal peptide region	1	22	-	29-08-2024	-	-
Fxa6Dg102489.1	a50ecfb94742bdb47cd1575861912b97	410	Phobius	CYTOPLASMIC_DOMAIN	Region of a membrane-bound protein predicted to be outside the membrane, in the cytoplasm.	408	410	-	29-08-2024	-	-
Fxa6Dg102489.1	a50ecfb94742bdb47cd1575861912b97	410	Phobius	TRANSMEMBRANE	Region of a membrane-bound protein predicted to be embedded in the membrane.	387	407	-	29-08-2024	-	-
Fxa6Dg102489.1	a50ecfb94742bdb47cd1575861912b97	410	Phobius	SIGNAL_PEPTIDE	Signal peptide region	1	34	-	29-08-2024	-	-
Fxa6Dg102489.1	a50ecfb94742bdb47cd1575861912b97	410	Phobius	SIGNAL_PEPTIDE_C_REGION	C-terminal region of a signal peptide.	27	34	-	29-08-2024	-	-
Fxa6Dg102489.1	a50ecfb94742bdb47cd1575861912b97	410	Pfam	PF00332	Glycosyl hydrolases family 17	45	363	9.2e-80	29-08-2024	IPR000490	Glycoside hydrolase family 17
Fxa6Dg102489.1	a50ecfb94742bdb47cd1575861912b97	410	Phobius	SIGNAL_PEPTIDE_N_REGION	N-terminal region of a signal peptide.	1	14	-	29-08-2024	-	-
Fxa6Dg102489.1	a50ecfb94742bdb47cd1575861912b97	410	Phobius	NON_CYTOPLASMIC_DOMAIN	Region of a membrane-bound protein predicted to be outside the membrane, in the extracellular region.	35	386	-	29-08-2024	-	-
Fxa6Dg102489.1	a50ecfb94742bdb47cd1575861912b97	410	Phobius	SIGNAL_PEPTIDE_H_REGION	Hydrophobic region of a signal peptide.	15	26	-	29-08-2024	-	-
Fxa4Cg201108.1	83da60cc58caa93f34d8bc8787a56c62	380	Phobius	SIGNAL_PEPTIDE_N_REGION	N-terminal region of a signal peptide.	1	3	-	29-08-2024	-	-
Fxa4Cg201108.1	83da60cc58caa93f34d8bc8787a56c62	380	Phobius	SIGNAL_PEPTIDE_H_REGION	Hydrophobic region of a signal peptide.	4	15	-	29-08-2024	-	-
Fxa4Cg201108.1	83da60cc58caa93f34d8bc8787a56c62	380	Phobius	NON_CYTOPLASMIC_DOMAIN	Region of a membrane-bound protein predicted to be outside the membrane, in the extracellular region.	23	380	-	29-08-2024	-	-
Fxa4Cg201108.1	83da60cc58caa93f34d8bc8787a56c62	380	Phobius	SIGNAL_PEPTIDE_C_REGION	C-terminal region of a signal peptide.	16	22	-	29-08-2024	-	-
Fxa4Cg201108.1	83da60cc58caa93f34d8bc8787a56c62	380	Phobius	SIGNAL_PEPTIDE	Signal peptide region	1	22	-	29-08-2024	-	-
Fxa4Cg201108.1	83da60cc58caa93f34d8bc8787a56c62	380	Pfam	PF00332	Glycosyl hydrolases family 17	24	353	2.5e-97	29-08-2024	IPR000490	Glycoside hydrolase family 17
Fxa7Cg102079.1	41d94a853de16ef63416c1429e7e85f1	477	MobiDBLite	mobidb-lite	consensus disorder prediction	341	381	-	29-08-2024	-	-
Fxa7Cg102079.1	41d94a853de16ef63416c1429e7e85f1	477	Phobius	SIGNAL_PEPTIDE_N_REGION	N-terminal region of a signal peptide.	1	6	-	29-08-2024	-	-
Fxa7Cg102079.1	41d94a853de16ef63416c1429e7e85f1	477	Pfam	PF07983	X8 domain	392	461	2.3e-17	29-08-2024	IPR012946	X8 domain
Fxa7Cg102079.1	41d94a853de16ef63416c1429e7e85f1	477	Phobius	SIGNAL_PEPTIDE_H_REGION	Hydrophobic region of a signal peptide.	7	17	-	29-08-2024	-	-
Fxa7Cg102079.1	41d94a853de16ef63416c1429e7e85f1	477	Phobius	SIGNAL_PEPTIDE_C_REGION	C-terminal region of a signal peptide.	18	22	-	29-08-2024	-	-
Fxa7Cg102079.1	41d94a853de16ef63416c1429e7e85f1	477	Phobius	SIGNAL_PEPTIDE	Signal peptide region	1	22	-	29-08-2024	-	-
Fxa7Cg102079.1	41d94a853de16ef63416c1429e7e85f1	477	Phobius	NON_CYTOPLASMIC_DOMAIN	Region of a membrane-bound protein predicted to be outside the membrane, in the extracellular region.	23	477	-	29-08-2024	-	-
Fxa7Cg102079.1	41d94a853de16ef63416c1429e7e85f1	477	Pfam	PF00332	Glycosyl hydrolases family 17	23	332	2.4e-71	29-08-2024	IPR000490	Glycoside hydrolase family 17
Fxa6Cg102089.1	5349042f7ebaa244a956adf5b95b49bc	362	Phobius	SIGNAL_PEPTIDE_H_REGION	Hydrophobic region of a signal peptide.	2	9	-	29-08-2024	-	-
Fxa6Cg102089.1	5349042f7ebaa244a956adf5b95b49bc	362	Phobius	SIGNAL_PEPTIDE_N_REGION	N-terminal region of a signal peptide.	1	1	-	29-08-2024	-	-
Fxa6Cg102089.1	5349042f7ebaa244a956adf5b95b49bc	362	Phobius	SIGNAL_PEPTIDE_C_REGION	C-terminal region of a signal peptide.	10	14	-	29-08-2024	-	-
Fxa6Cg102089.1	5349042f7ebaa244a956adf5b95b49bc	362	Pfam	PF00332	Glycosyl hydrolases family 17	48	361	4e-101	29-08-2024	IPR000490	Glycoside hydrolase family 17
Fxa6Cg102089.1	5349042f7ebaa244a956adf5b95b49bc	362	Phobius	NON_CYTOPLASMIC_DOMAIN	Region of a membrane-bound protein predicted to be outside the membrane, in the extracellular region.	15	362	-	29-08-2024	-	-
Fxa6Cg102089.1	5349042f7ebaa244a956adf5b95b49bc	362	Phobius	SIGNAL_PEPTIDE	Signal peptide region	1	14	-	29-08-2024	-	-
Fxa6Bg102633.1	31bcba34ddb58746958dd6152065d39d	410	Phobius	TRANSMEMBRANE	Region of a membrane-bound protein predicted to be embedded in the membrane.	387	407	-	29-08-2024	-	-
Fxa6Bg102633.1	31bcba34ddb58746958dd6152065d39d	410	Phobius	CYTOPLASMIC_DOMAIN	Region of a membrane-bound protein predicted to be outside the membrane, in the cytoplasm.	408	410	-	29-08-2024	-	-
Fxa6Bg102633.1	31bcba34ddb58746958dd6152065d39d	410	Phobius	NON_CYTOPLASMIC_DOMAIN	Region of a membrane-bound protein predicted to be outside the membrane, in the extracellular region.	33	386	-	29-08-2024	-	-
Fxa6Bg102633.1	31bcba34ddb58746958dd6152065d39d	410	Phobius	SIGNAL_PEPTIDE_H_REGION	Hydrophobic region of a signal peptide.	16	27	-	29-08-2024	-	-
Fxa6Bg102633.1	31bcba34ddb58746958dd6152065d39d	410	Phobius	SIGNAL_PEPTIDE_N_REGION	N-terminal region of a signal peptide.	1	15	-	29-08-2024	-	-
Fxa6Bg102633.1	31bcba34ddb58746958dd6152065d39d	410	Phobius	SIGNAL_PEPTIDE_C_REGION	C-terminal region of a signal peptide.	28	32	-	29-08-2024	-	-
Fxa6Bg102633.1	31bcba34ddb58746958dd6152065d39d	410	Pfam	PF00332	Glycosyl hydrolases family 17	45	361	3.6e-79	29-08-2024	IPR000490	Glycoside hydrolase family 17
Fxa6Bg102633.1	31bcba34ddb58746958dd6152065d39d	410	Phobius	SIGNAL_PEPTIDE	Signal peptide region	1	32	-	29-08-2024	-	-
Fxa3Dg200576.1	a0f7d45f8b6eb8a1ef64b7cf27b9c9a5	188	MobiDBLite	mobidb-lite	consensus disorder prediction	1	39	-	29-08-2024	-	-
Fxa3Dg200576.1	a0f7d45f8b6eb8a1ef64b7cf27b9c9a5	188	MobiDBLite	mobidb-lite	consensus disorder prediction	133	188	-	29-08-2024	-	-
Fxa3Dg200576.1	a0f7d45f8b6eb8a1ef64b7cf27b9c9a5	188	MobiDBLite	mobidb-lite	consensus disorder prediction	173	188	-	29-08-2024	-	-
Fxa3Dg200576.1	a0f7d45f8b6eb8a1ef64b7cf27b9c9a5	188	MobiDBLite	mobidb-lite	consensus disorder prediction	1	16	-	29-08-2024	-	-
Fxa3Dg200576.1	a0f7d45f8b6eb8a1ef64b7cf27b9c9a5	188	MobiDBLite	mobidb-lite	consensus disorder prediction	17	38	-	29-08-2024	-	-
Fxa3Dg200576.1	a0f7d45f8b6eb8a1ef64b7cf27b9c9a5	188	MobiDBLite	mobidb-lite	consensus disorder prediction	133	161	-	29-08-2024	-	-
Fxa3Dg200575.1	e33f9870733c086fb639424ae270f88f	174	Pfam	PF00332	Glycosyl hydrolases family 17	44	165	3.2e-08	29-08-2024	IPR000490	Glycoside hydrolase family 17
Fxa1Ag100877.1	a7a43cb1d11866fd21a873169754a7a8	500	Phobius	NON_CYTOPLASMIC_DOMAIN	Region of a membrane-bound protein predicted to be outside the membrane, in the extracellular region.	22	480	-	29-08-2024	-	-
Fxa1Ag100877.1	a7a43cb1d11866fd21a873169754a7a8	500	Phobius	SIGNAL_PEPTIDE_H_REGION	Hydrophobic region of a signal peptide.	6	13	-	29-08-2024	-	-
Fxa1Ag100877.1	a7a43cb1d11866fd21a873169754a7a8	500	Phobius	CYTOPLASMIC_DOMAIN	Region of a membrane-bound protein predicted to be outside the membrane, in the cytoplasm.	500	500	-	29-08-2024	-	-
Fxa1Ag100877.1	a7a43cb1d11866fd21a873169754a7a8	500	Phobius	SIGNAL_PEPTIDE_C_REGION	C-terminal region of a signal peptide.	14	21	-	29-08-2024	-	-
Fxa1Ag100877.1	a7a43cb1d11866fd21a873169754a7a8	500	Phobius	SIGNAL_PEPTIDE	Signal peptide region	1	21	-	29-08-2024	-	-
Fxa1Ag100877.1	a7a43cb1d11866fd21a873169754a7a8	500	Pfam	PF07983	X8 domain	363	432	5.5e-11	29-08-2024	IPR012946	X8 domain
Fxa1Ag100877.1	a7a43cb1d11866fd21a873169754a7a8	500	Pfam	PF00332	Glycosyl hydrolases family 17	27	344	2.2e-56	29-08-2024	IPR000490	Glycoside hydrolase family 17
Fxa1Ag100877.1	a7a43cb1d11866fd21a873169754a7a8	500	Phobius	TRANSMEMBRANE	Region of a membrane-bound protein predicted to be embedded in the membrane.	481	499	-	29-08-2024	-	-
Fxa1Ag100877.1	a7a43cb1d11866fd21a873169754a7a8	500	Phobius	SIGNAL_PEPTIDE_N_REGION	N-terminal region of a signal peptide.	1	5	-	29-08-2024	-	-
Fxa1Cg100729.1	d0861614d1aeb61a405c236323364e3d	318	Phobius	SIGNAL_PEPTIDE_C_REGION	C-terminal region of a signal peptide.	18	26	-	29-08-2024	-	-
Fxa1Cg100729.1	d0861614d1aeb61a405c236323364e3d	318	Pfam	PF00332	Glycosyl hydrolases family 17	35	317	3.9e-48	29-08-2024	IPR000490	Glycoside hydrolase family 17
Fxa1Cg100729.1	d0861614d1aeb61a405c236323364e3d	318	Phobius	SIGNAL_PEPTIDE	Signal peptide region	1	26	-	29-08-2024	-	-
Fxa1Cg100729.1	d0861614d1aeb61a405c236323364e3d	318	Phobius	SIGNAL_PEPTIDE_H_REGION	Hydrophobic region of a signal peptide.	6	17	-	29-08-2024	-	-
Fxa1Cg100729.1	d0861614d1aeb61a405c236323364e3d	318	Phobius	NON_CYTOPLASMIC_DOMAIN	Region of a membrane-bound protein predicted to be outside the membrane, in the extracellular region.	27	318	-	29-08-2024	-	-
Fxa1Cg100729.1	d0861614d1aeb61a405c236323364e3d	318	Phobius	SIGNAL_PEPTIDE_N_REGION	N-terminal region of a signal peptide.	1	5	-	29-08-2024	-	-
Fxa4Cg202845.1	8aab66fa52e0efd79d0acac06c08f14c	505	Pfam	PF07983	X8 domain	366	437	4.2e-17	29-08-2024	IPR012946	X8 domain
Fxa4Cg202845.1	8aab66fa52e0efd79d0acac06c08f14c	505	Phobius	CYTOPLASMIC_DOMAIN	Region of a membrane-bound protein predicted to be outside the membrane, in the cytoplasm.	505	505	-	29-08-2024	-	-
Fxa4Cg202845.1	8aab66fa52e0efd79d0acac06c08f14c	505	Phobius	SIGNAL_PEPTIDE	Signal peptide region	1	23	-	29-08-2024	-	-
Fxa4Cg202845.1	8aab66fa52e0efd79d0acac06c08f14c	505	Phobius	SIGNAL_PEPTIDE_C_REGION	C-terminal region of a signal peptide.	19	23	-	29-08-2024	-	-
Fxa4Cg202845.1	8aab66fa52e0efd79d0acac06c08f14c	505	Pfam	PF00332	Glycosyl hydrolases family 17	29	349	6.3e-74	29-08-2024	IPR000490	Glycoside hydrolase family 17
Fxa4Cg202845.1	8aab66fa52e0efd79d0acac06c08f14c	505	Phobius	SIGNAL_PEPTIDE_N_REGION	N-terminal region of a signal peptide.	1	8	-	29-08-2024	-	-
Fxa4Cg202845.1	8aab66fa52e0efd79d0acac06c08f14c	505	Phobius	SIGNAL_PEPTIDE_H_REGION	Hydrophobic region of a signal peptide.	9	18	-	29-08-2024	-	-
Fxa4Cg202845.1	8aab66fa52e0efd79d0acac06c08f14c	505	Phobius	NON_CYTOPLASMIC_DOMAIN	Region of a membrane-bound protein predicted to be outside the membrane, in the extracellular region.	24	480	-	29-08-2024	-	-
Fxa4Cg202845.1	8aab66fa52e0efd79d0acac06c08f14c	505	Phobius	TRANSMEMBRANE	Region of a membrane-bound protein predicted to be embedded in the membrane.	481	504	-	29-08-2024	-	-
Fxa3Bg202022.1	2e0eee37c93eab84228d5e65949896be	471	Phobius	SIGNAL_PEPTIDE	Signal peptide region	1	23	-	29-08-2024	-	-
Fxa3Bg202022.1	2e0eee37c93eab84228d5e65949896be	471	Phobius	NON_CYTOPLASMIC_DOMAIN	Region of a membrane-bound protein predicted to be outside the membrane, in the extracellular region.	24	471	-	29-08-2024	-	-
Fxa3Bg202022.1	2e0eee37c93eab84228d5e65949896be	471	Phobius	SIGNAL_PEPTIDE_H_REGION	Hydrophobic region of a signal peptide.	4	15	-	29-08-2024	-	-
Fxa3Bg202022.1	2e0eee37c93eab84228d5e65949896be	471	Phobius	SIGNAL_PEPTIDE_N_REGION	N-terminal region of a signal peptide.	1	3	-	29-08-2024	-	-
Fxa3Bg202022.1	2e0eee37c93eab84228d5e65949896be	471	Pfam	PF07983	X8 domain	376	447	6.5e-20	29-08-2024	IPR012946	X8 domain
Fxa3Bg202022.1	2e0eee37c93eab84228d5e65949896be	471	Pfam	PF00332	Glycosyl hydrolases family 17	29	346	7.2e-91	29-08-2024	IPR000490	Glycoside hydrolase family 17
Fxa3Bg202022.1	2e0eee37c93eab84228d5e65949896be	471	Phobius	SIGNAL_PEPTIDE_C_REGION	C-terminal region of a signal peptide.	16	23	-	29-08-2024	-	-
Fxa1Bg201988.1	e62f76098d2fe339ac0201c503d10807	477	Pfam	PF00332	Glycosyl hydrolases family 17	26	344	4.5e-62	29-08-2024	IPR000490	Glycoside hydrolase family 17
Fxa1Bg201988.1	e62f76098d2fe339ac0201c503d10807	477	Phobius	SIGNAL_PEPTIDE_N_REGION	N-terminal region of a signal peptide.	1	3	-	29-08-2024	-	-
Fxa1Bg201988.1	e62f76098d2fe339ac0201c503d10807	477	Pfam	PF07983	X8 domain	366	435	1.5e-10	29-08-2024	IPR012946	X8 domain
Fxa1Bg201988.1	e62f76098d2fe339ac0201c503d10807	477	Phobius	SIGNAL_PEPTIDE	Signal peptide region	1	25	-	29-08-2024	-	-
Fxa1Bg201988.1	e62f76098d2fe339ac0201c503d10807	477	Phobius	SIGNAL_PEPTIDE_C_REGION	C-terminal region of a signal peptide.	18	25	-	29-08-2024	-	-
Fxa1Bg201988.1	e62f76098d2fe339ac0201c503d10807	477	Phobius	SIGNAL_PEPTIDE_H_REGION	Hydrophobic region of a signal peptide.	4	17	-	29-08-2024	-	-
Fxa1Bg201988.1	e62f76098d2fe339ac0201c503d10807	477	Phobius	NON_CYTOPLASMIC_DOMAIN	Region of a membrane-bound protein predicted to be outside the membrane, in the extracellular region.	26	477	-	29-08-2024	-	-
Fxa7Bg202127.1	c30059fda9b894e84b46a1e833560d03	445	Pfam	PF07983	X8 domain	360	429	2.7e-17	29-08-2024	IPR012946	X8 domain
Fxa7Bg202127.1	c30059fda9b894e84b46a1e833560d03	445	Pfam	PF00332	Glycosyl hydrolases family 17	21	328	8.3e-76	29-08-2024	IPR000490	Glycoside hydrolase family 17
Fxa7Bg202127.1	c30059fda9b894e84b46a1e833560d03	445	Phobius	NON_CYTOPLASMIC_DOMAIN	Region of a membrane-bound protein predicted to be outside the membrane, in the extracellular region.	21	445	-	29-08-2024	-	-
Fxa7Bg202127.1	c30059fda9b894e84b46a1e833560d03	445	Phobius	SIGNAL_PEPTIDE	Signal peptide region	1	20	-	29-08-2024	-	-
Fxa7Bg202127.1	c30059fda9b894e84b46a1e833560d03	445	Phobius	SIGNAL_PEPTIDE_N_REGION	N-terminal region of a signal peptide.	1	4	-	29-08-2024	-	-
Fxa7Bg202127.1	c30059fda9b894e84b46a1e833560d03	445	Phobius	SIGNAL_PEPTIDE_H_REGION	Hydrophobic region of a signal peptide.	5	15	-	29-08-2024	-	-
Fxa7Bg202127.1	c30059fda9b894e84b46a1e833560d03	445	Phobius	SIGNAL_PEPTIDE_C_REGION	C-terminal region of a signal peptide.	16	20	-	29-08-2024	-	-
Fxa3Bg203365.1	0e4afa04aefed33049059c392d4330ee	482	Phobius	SIGNAL_PEPTIDE_H_REGION	Hydrophobic region of a signal peptide.	4	14	-	29-08-2024	-	-
Fxa3Bg203365.1	0e4afa04aefed33049059c392d4330ee	482	Phobius	SIGNAL_PEPTIDE_N_REGION	N-terminal region of a signal peptide.	1	3	-	29-08-2024	-	-
Fxa3Bg203365.1	0e4afa04aefed33049059c392d4330ee	482	Phobius	CYTOPLASMIC_DOMAIN	Region of a membrane-bound protein predicted to be outside the membrane, in the cytoplasm.	479	482	-	29-08-2024	-	-
Fxa3Bg203365.1	0e4afa04aefed33049059c392d4330ee	482	Pfam	PF00332	Glycosyl hydrolases family 17	22	345	6e-63	29-08-2024	IPR000490	Glycoside hydrolase family 17
Fxa3Bg203365.1	0e4afa04aefed33049059c392d4330ee	482	Phobius	SIGNAL_PEPTIDE	Signal peptide region	1	21	-	29-08-2024	-	-
Fxa3Bg203365.1	0e4afa04aefed33049059c392d4330ee	482	Pfam	PF07983	X8 domain	365	432	2e-11	29-08-2024	IPR012946	X8 domain
Fxa3Bg203365.1	0e4afa04aefed33049059c392d4330ee	482	Phobius	TRANSMEMBRANE	Region of a membrane-bound protein predicted to be embedded in the membrane.	458	478	-	29-08-2024	-	-
Fxa3Bg203365.1	0e4afa04aefed33049059c392d4330ee	482	Phobius	NON_CYTOPLASMIC_DOMAIN	Region of a membrane-bound protein predicted to be outside the membrane, in the extracellular region.	22	457	-	29-08-2024	-	-
Fxa3Bg203365.1	0e4afa04aefed33049059c392d4330ee	482	Phobius	SIGNAL_PEPTIDE_C_REGION	C-terminal region of a signal peptide.	15	21	-	29-08-2024	-	-
Fxa4Ag101383.1	a2c1a553f9681efc62ae7d7a89fc0b8f	161	MobiDBLite	mobidb-lite	consensus disorder prediction	146	161	-	29-08-2024	-	-
Fxa4Ag101383.1	a2c1a553f9681efc62ae7d7a89fc0b8f	161	Phobius	CYTOPLASMIC_DOMAIN	Region of a membrane-bound protein predicted to be outside the membrane, in the cytoplasm.	26	161	-	29-08-2024	-	-
Fxa4Ag101383.1	a2c1a553f9681efc62ae7d7a89fc0b8f	161	Phobius	NON_CYTOPLASMIC_DOMAIN	Region of a membrane-bound protein predicted to be outside the membrane, in the extracellular region.	1	5	-	29-08-2024	-	-
Fxa4Ag101383.1	a2c1a553f9681efc62ae7d7a89fc0b8f	161	Phobius	TRANSMEMBRANE	Region of a membrane-bound protein predicted to be embedded in the membrane.	6	25	-	29-08-2024	-	-
Fxa4Ag101383.1	a2c1a553f9681efc62ae7d7a89fc0b8f	161	MobiDBLite	mobidb-lite	consensus disorder prediction	133	161	-	29-08-2024	-	-
Fxa4Ag102844.1	2043e349531962ff01cecca2ea69e8f2	486	Pfam	PF00332	Glycosyl hydrolases family 17	32	346	4.5e-76	29-08-2024	IPR000490	Glycoside hydrolase family 17
Fxa4Ag102844.1	2043e349531962ff01cecca2ea69e8f2	486	MobiDBLite	mobidb-lite	consensus disorder prediction	353	440	-	29-08-2024	-	-
Fxa4Ag102844.1	2043e349531962ff01cecca2ea69e8f2	486	MobiDBLite	mobidb-lite	consensus disorder prediction	413	427	-	29-08-2024	-	-
Fxa4Ag102844.1	2043e349531962ff01cecca2ea69e8f2	486	Phobius	SIGNAL_PEPTIDE_N_REGION	N-terminal region of a signal peptide.	1	8	-	29-08-2024	-	-
Fxa4Ag102844.1	2043e349531962ff01cecca2ea69e8f2	486	MobiDBLite	mobidb-lite	consensus disorder prediction	373	405	-	29-08-2024	-	-
Fxa4Ag102844.1	2043e349531962ff01cecca2ea69e8f2	486	Phobius	SIGNAL_PEPTIDE	Signal peptide region	1	31	-	29-08-2024	-	-
Fxa4Ag102844.1	2043e349531962ff01cecca2ea69e8f2	486	Phobius	CYTOPLASMIC_DOMAIN	Region of a membrane-bound protein predicted to be outside the membrane, in the cytoplasm.	483	486	-	29-08-2024	-	-
Fxa4Ag102844.1	2043e349531962ff01cecca2ea69e8f2	486	Phobius	NON_CYTOPLASMIC_DOMAIN	Region of a membrane-bound protein predicted to be outside the membrane, in the extracellular region.	32	461	-	29-08-2024	-	-
Fxa4Ag102844.1	2043e349531962ff01cecca2ea69e8f2	486	Phobius	SIGNAL_PEPTIDE_H_REGION	Hydrophobic region of a signal peptide.	9	20	-	29-08-2024	-	-
Fxa4Ag102844.1	2043e349531962ff01cecca2ea69e8f2	486	Phobius	SIGNAL_PEPTIDE_C_REGION	C-terminal region of a signal peptide.	21	31	-	29-08-2024	-	-
Fxa4Ag102844.1	2043e349531962ff01cecca2ea69e8f2	486	Phobius	TRANSMEMBRANE	Region of a membrane-bound protein predicted to be embedded in the membrane.	462	482	-	29-08-2024	-	-
Fxa4Bg102742.1	dac33ef1b24de7903aedfb53a02ae7cd	463	Phobius	SIGNAL_PEPTIDE	Signal peptide region	1	28	-	29-08-2024	-	-
Fxa4Bg102742.1	dac33ef1b24de7903aedfb53a02ae7cd	463	Phobius	TRANSMEMBRANE	Region of a membrane-bound protein predicted to be embedded in the membrane.	429	449	-	29-08-2024	-	-
Fxa4Bg102742.1	dac33ef1b24de7903aedfb53a02ae7cd	463	MobiDBLite	mobidb-lite	consensus disorder prediction	351	410	-	29-08-2024	-	-
Fxa4Bg102742.1	dac33ef1b24de7903aedfb53a02ae7cd	463	MobiDBLite	mobidb-lite	consensus disorder prediction	372	391	-	29-08-2024	-	-
Fxa4Bg102742.1	dac33ef1b24de7903aedfb53a02ae7cd	463	Phobius	NON_CYTOPLASMIC_DOMAIN	Region of a membrane-bound protein predicted to be outside the membrane, in the extracellular region.	29	428	-	29-08-2024	-	-
Fxa4Bg102742.1	dac33ef1b24de7903aedfb53a02ae7cd	463	Phobius	SIGNAL_PEPTIDE_N_REGION	N-terminal region of a signal peptide.	1	9	-	29-08-2024	-	-
Fxa4Bg102742.1	dac33ef1b24de7903aedfb53a02ae7cd	463	Pfam	PF00332	Glycosyl hydrolases family 17	30	343	1.4e-74	29-08-2024	IPR000490	Glycoside hydrolase family 17
Fxa4Bg102742.1	dac33ef1b24de7903aedfb53a02ae7cd	463	Phobius	SIGNAL_PEPTIDE_C_REGION	C-terminal region of a signal peptide.	24	28	-	29-08-2024	-	-
Fxa4Bg102742.1	dac33ef1b24de7903aedfb53a02ae7cd	463	MobiDBLite	mobidb-lite	consensus disorder prediction	392	407	-	29-08-2024	-	-
Fxa4Bg102742.1	dac33ef1b24de7903aedfb53a02ae7cd	463	Phobius	CYTOPLASMIC_DOMAIN	Region of a membrane-bound protein predicted to be outside the membrane, in the cytoplasm.	450	463	-	29-08-2024	-	-
Fxa4Bg102742.1	dac33ef1b24de7903aedfb53a02ae7cd	463	Phobius	SIGNAL_PEPTIDE_H_REGION	Hydrophobic region of a signal peptide.	10	23	-	29-08-2024	-	-
Fxa1Bg202889.1	decdc8ef24528ac00dd0ce2ca7f8173e	286	Phobius	NON_CYTOPLASMIC_DOMAIN	Region of a membrane-bound protein predicted to be outside the membrane, in the extracellular region.	29	286	-	29-08-2024	-	-
Fxa1Bg202889.1	decdc8ef24528ac00dd0ce2ca7f8173e	286	Phobius	SIGNAL_PEPTIDE_C_REGION	C-terminal region of a signal peptide.	22	28	-	29-08-2024	-	-
Fxa1Bg202889.1	decdc8ef24528ac00dd0ce2ca7f8173e	286	Phobius	SIGNAL_PEPTIDE	Signal peptide region	1	28	-	29-08-2024	-	-
Fxa1Bg202889.1	decdc8ef24528ac00dd0ce2ca7f8173e	286	Phobius	SIGNAL_PEPTIDE_N_REGION	N-terminal region of a signal peptide.	1	9	-	29-08-2024	-	-
Fxa1Bg202889.1	decdc8ef24528ac00dd0ce2ca7f8173e	286	Pfam	PF00332	Glycosyl hydrolases family 17	29	280	4.8e-44	29-08-2024	IPR000490	Glycoside hydrolase family 17
Fxa1Bg202889.1	decdc8ef24528ac00dd0ce2ca7f8173e	286	Phobius	SIGNAL_PEPTIDE_H_REGION	Hydrophobic region of a signal peptide.	10	21	-	29-08-2024	-	-
Fxa4Ag102847.1	5ab98e15926bf0b500d901606f17097e	486	Phobius	SIGNAL_PEPTIDE_N_REGION	N-terminal region of a signal peptide.	1	6	-	29-08-2024	-	-
Fxa4Ag102847.1	5ab98e15926bf0b500d901606f17097e	486	MobiDBLite	mobidb-lite	consensus disorder prediction	364	398	-	29-08-2024	-	-
Fxa4Ag102847.1	5ab98e15926bf0b500d901606f17097e	486	MobiDBLite	mobidb-lite	consensus disorder prediction	349	398	-	29-08-2024	-	-
Fxa4Ag102847.1	5ab98e15926bf0b500d901606f17097e	486	Phobius	SIGNAL_PEPTIDE	Signal peptide region	1	25	-	29-08-2024	-	-
Fxa4Ag102847.1	5ab98e15926bf0b500d901606f17097e	486	Phobius	NON_CYTOPLASMIC_DOMAIN	Region of a membrane-bound protein predicted to be outside the membrane, in the extracellular region.	26	486	-	29-08-2024	-	-
Fxa4Ag102847.1	5ab98e15926bf0b500d901606f17097e	486	Pfam	PF00332	Glycosyl hydrolases family 17	26	341	3.6e-75	29-08-2024	IPR000490	Glycoside hydrolase family 17
Fxa4Ag102847.1	5ab98e15926bf0b500d901606f17097e	486	Phobius	SIGNAL_PEPTIDE_H_REGION	Hydrophobic region of a signal peptide.	7	18	-	29-08-2024	-	-
Fxa4Ag102847.1	5ab98e15926bf0b500d901606f17097e	486	Phobius	SIGNAL_PEPTIDE_C_REGION	C-terminal region of a signal peptide.	19	25	-	29-08-2024	-	-
Fxa7Ag203153.1	7826f4bc0652959db566aaed15bf50b1	669	MobiDBLite	mobidb-lite	consensus disorder prediction	559	584	-	29-08-2024	-	-
Fxa7Ag203153.1	7826f4bc0652959db566aaed15bf50b1	669	MobiDBLite	mobidb-lite	consensus disorder prediction	559	579	-	29-08-2024	-	-
Fxa7Ag203153.1	7826f4bc0652959db566aaed15bf50b1	669	Pfam	PF00332	Glycosyl hydrolases family 17	240	554	1.9e-78	29-08-2024	IPR000490	Glycoside hydrolase family 17
Fxa7Ag203153.1	7826f4bc0652959db566aaed15bf50b1	669	Pfam	PF00112	Papain family cysteine protease	35	218	6.3e-47	29-08-2024	IPR000668	Peptidase C1A, papain C-terminal
Fxa7Ag203153.1	7826f4bc0652959db566aaed15bf50b1	669	Pfam	PF07983	X8 domain	586	655	5.1e-15	29-08-2024	IPR012946	X8 domain
Fxa6Ag104039.1	9b2730d2fa4c125f37f0835ad7b1a989	481	Pfam	PF00332	Glycosyl hydrolases family 17	25	344	4.6e-84	29-08-2024	IPR000490	Glycoside hydrolase family 17
Fxa6Ag104039.1	9b2730d2fa4c125f37f0835ad7b1a989	481	Phobius	SIGNAL_PEPTIDE_H_REGION	Hydrophobic region of a signal peptide.	6	17	-	29-08-2024	-	-
Fxa6Ag104039.1	9b2730d2fa4c125f37f0835ad7b1a989	481	Pfam	PF07983	X8 domain	383	454	4.2e-20	29-08-2024	IPR012946	X8 domain
Fxa6Ag104039.1	9b2730d2fa4c125f37f0835ad7b1a989	481	Phobius	NON_CYTOPLASMIC_DOMAIN	Region of a membrane-bound protein predicted to be outside the membrane, in the extracellular region.	23	481	-	29-08-2024	-	-
Fxa6Ag104039.1	9b2730d2fa4c125f37f0835ad7b1a989	481	Phobius	SIGNAL_PEPTIDE_C_REGION	C-terminal region of a signal peptide.	18	22	-	29-08-2024	-	-
Fxa6Ag104039.1	9b2730d2fa4c125f37f0835ad7b1a989	481	Phobius	SIGNAL_PEPTIDE_N_REGION	N-terminal region of a signal peptide.	1	5	-	29-08-2024	-	-
Fxa6Ag104039.1	9b2730d2fa4c125f37f0835ad7b1a989	481	Phobius	SIGNAL_PEPTIDE	Signal peptide region	1	22	-	29-08-2024	-	-
Fxa2Ag103024.1	4096900a6d0c42357babf4778019a038	482	Phobius	NON_CYTOPLASMIC_DOMAIN	Region of a membrane-bound protein predicted to be outside the membrane, in the extracellular region.	24	460	-	29-08-2024	-	-
Fxa2Ag103024.1	4096900a6d0c42357babf4778019a038	482	Phobius	SIGNAL_PEPTIDE	Signal peptide region	1	23	-	29-08-2024	-	-
Fxa2Ag103024.1	4096900a6d0c42357babf4778019a038	482	Phobius	SIGNAL_PEPTIDE_N_REGION	N-terminal region of a signal peptide.	1	6	-	29-08-2024	-	-
Fxa2Ag103024.1	4096900a6d0c42357babf4778019a038	482	Pfam	PF00332	Glycosyl hydrolases family 17	24	342	5.4e-62	29-08-2024	IPR000490	Glycoside hydrolase family 17
Fxa2Ag103024.1	4096900a6d0c42357babf4778019a038	482	Phobius	SIGNAL_PEPTIDE_C_REGION	C-terminal region of a signal peptide.	19	23	-	29-08-2024	-	-
Fxa2Ag103024.1	4096900a6d0c42357babf4778019a038	482	Phobius	TRANSMEMBRANE	Region of a membrane-bound protein predicted to be embedded in the membrane.	461	481	-	29-08-2024	-	-
Fxa2Ag103024.1	4096900a6d0c42357babf4778019a038	482	Pfam	PF07983	X8 domain	361	430	9e-09	29-08-2024	IPR012946	X8 domain
Fxa2Ag103024.1	4096900a6d0c42357babf4778019a038	482	Phobius	CYTOPLASMIC_DOMAIN	Region of a membrane-bound protein predicted to be outside the membrane, in the cytoplasm.	482	482	-	29-08-2024	-	-
Fxa2Ag103024.1	4096900a6d0c42357babf4778019a038	482	Phobius	SIGNAL_PEPTIDE_H_REGION	Hydrophobic region of a signal peptide.	7	18	-	29-08-2024	-	-
Fxa1Ag100477.1	085f0a5b93da0ae365ff9b5bc3763bc3	650	Phobius	NON_CYTOPLASMIC_DOMAIN	Region of a membrane-bound protein predicted to be outside the membrane, in the extracellular region.	32	650	-	29-08-2024	-	-
Fxa1Ag100477.1	085f0a5b93da0ae365ff9b5bc3763bc3	650	Phobius	SIGNAL_PEPTIDE_H_REGION	Hydrophobic region of a signal peptide.	12	23	-	29-08-2024	-	-
Fxa1Ag100477.1	085f0a5b93da0ae365ff9b5bc3763bc3	650	Pfam	PF07983	X8 domain	373	441	6.8e-12	29-08-2024	IPR012946	X8 domain
Fxa1Ag100477.1	085f0a5b93da0ae365ff9b5bc3763bc3	650	Phobius	SIGNAL_PEPTIDE	Signal peptide region	1	31	-	29-08-2024	-	-
Fxa1Ag100477.1	085f0a5b93da0ae365ff9b5bc3763bc3	650	Phobius	SIGNAL_PEPTIDE_C_REGION	C-terminal region of a signal peptide.	24	31	-	29-08-2024	-	-
Fxa1Ag100477.1	085f0a5b93da0ae365ff9b5bc3763bc3	650	Phobius	SIGNAL_PEPTIDE_N_REGION	N-terminal region of a signal peptide.	1	11	-	29-08-2024	-	-
Fxa1Ag100477.1	085f0a5b93da0ae365ff9b5bc3763bc3	650	Pfam	PF00332	Glycosyl hydrolases family 17	31	350	1.3e-55	29-08-2024	IPR000490	Glycoside hydrolase family 17
Fxa6Ag102875.1	1c82a8eb99a933f676fadee38f824f8f	410	Phobius	NON_CYTOPLASMIC_DOMAIN	Region of a membrane-bound protein predicted to be outside the membrane, in the extracellular region.	33	386	-	29-08-2024	-	-
Fxa6Ag102875.1	1c82a8eb99a933f676fadee38f824f8f	410	Phobius	CYTOPLASMIC_DOMAIN	Region of a membrane-bound protein predicted to be outside the membrane, in the cytoplasm.	408	410	-	29-08-2024	-	-
Fxa6Ag102875.1	1c82a8eb99a933f676fadee38f824f8f	410	Phobius	TRANSMEMBRANE	Region of a membrane-bound protein predicted to be embedded in the membrane.	387	407	-	29-08-2024	-	-
Fxa6Ag102875.1	1c82a8eb99a933f676fadee38f824f8f	410	Phobius	SIGNAL_PEPTIDE_H_REGION	Hydrophobic region of a signal peptide.	16	27	-	29-08-2024	-	-
Fxa6Ag102875.1	1c82a8eb99a933f676fadee38f824f8f	410	Phobius	SIGNAL_PEPTIDE_N_REGION	N-terminal region of a signal peptide.	1	15	-	29-08-2024	-	-
Fxa6Ag102875.1	1c82a8eb99a933f676fadee38f824f8f	410	Pfam	PF00332	Glycosyl hydrolases family 17	45	363	5.5e-79	29-08-2024	IPR000490	Glycoside hydrolase family 17
Fxa6Ag102875.1	1c82a8eb99a933f676fadee38f824f8f	410	Phobius	SIGNAL_PEPTIDE_C_REGION	C-terminal region of a signal peptide.	28	32	-	29-08-2024	-	-
Fxa6Ag102875.1	1c82a8eb99a933f676fadee38f824f8f	410	Phobius	SIGNAL_PEPTIDE	Signal peptide region	1	32	-	29-08-2024	-	-
Fxa5Bg102256.1	38f4aa5cfbcd0779ef9eb5e61b3917d6	468	Pfam	PF07983	X8 domain	388	434	4.2e-09	29-08-2024	IPR012946	X8 domain
Fxa5Bg102256.1	38f4aa5cfbcd0779ef9eb5e61b3917d6	468	Phobius	SIGNAL_PEPTIDE_N_REGION	N-terminal region of a signal peptide.	1	3	-	29-08-2024	-	-
Fxa5Bg102256.1	38f4aa5cfbcd0779ef9eb5e61b3917d6	468	Phobius	SIGNAL_PEPTIDE_H_REGION	Hydrophobic region of a signal peptide.	4	15	-	29-08-2024	-	-
Fxa5Bg102256.1	38f4aa5cfbcd0779ef9eb5e61b3917d6	468	Phobius	SIGNAL_PEPTIDE	Signal peptide region	1	24	-	29-08-2024	-	-
Fxa5Bg102256.1	38f4aa5cfbcd0779ef9eb5e61b3917d6	468	Phobius	SIGNAL_PEPTIDE_C_REGION	C-terminal region of a signal peptide.	16	24	-	29-08-2024	-	-
Fxa5Bg102256.1	38f4aa5cfbcd0779ef9eb5e61b3917d6	468	Pfam	PF00332	Glycosyl hydrolases family 17	26	370	2.5e-72	29-08-2024	IPR000490	Glycoside hydrolase family 17
Fxa5Bg102256.1	38f4aa5cfbcd0779ef9eb5e61b3917d6	468	Phobius	NON_CYTOPLASMIC_DOMAIN	Region of a membrane-bound protein predicted to be outside the membrane, in the extracellular region.	25	468	-	29-08-2024	-	-
Fxa6Dg102069.1	671b70875417b22d8d76ae78c0e4cafc	362	Phobius	SIGNAL_PEPTIDE_H_REGION	Hydrophobic region of a signal peptide.	2	9	-	29-08-2024	-	-
Fxa6Dg102069.1	671b70875417b22d8d76ae78c0e4cafc	362	Phobius	SIGNAL_PEPTIDE_N_REGION	N-terminal region of a signal peptide.	1	1	-	29-08-2024	-	-
Fxa6Dg102069.1	671b70875417b22d8d76ae78c0e4cafc	362	Pfam	PF00332	Glycosyl hydrolases family 17	48	361	2e-100	29-08-2024	IPR000490	Glycoside hydrolase family 17
Fxa6Dg102069.1	671b70875417b22d8d76ae78c0e4cafc	362	Phobius	SIGNAL_PEPTIDE_C_REGION	C-terminal region of a signal peptide.	10	14	-	29-08-2024	-	-
Fxa6Dg102069.1	671b70875417b22d8d76ae78c0e4cafc	362	Phobius	NON_CYTOPLASMIC_DOMAIN	Region of a membrane-bound protein predicted to be outside the membrane, in the extracellular region.	15	362	-	29-08-2024	-	-
Fxa6Dg102069.1	671b70875417b22d8d76ae78c0e4cafc	362	Phobius	SIGNAL_PEPTIDE	Signal peptide region	1	14	-	29-08-2024	-	-
Fxa4Ag102889.1	a36e94a1a2bc4cc1ab958a9819a38ddb	347	Phobius	SIGNAL_PEPTIDE_N_REGION	N-terminal region of a signal peptide.	1	15	-	29-08-2024	-	-
Fxa4Ag102889.1	a36e94a1a2bc4cc1ab958a9819a38ddb	347	Phobius	SIGNAL_PEPTIDE_C_REGION	C-terminal region of a signal peptide.	28	34	-	29-08-2024	-	-
Fxa4Ag102889.1	a36e94a1a2bc4cc1ab958a9819a38ddb	347	Pfam	PF00332	Glycosyl hydrolases family 17	36	346	4.6e-102	29-08-2024	IPR000490	Glycoside hydrolase family 17
Fxa4Ag102889.1	a36e94a1a2bc4cc1ab958a9819a38ddb	347	Phobius	SIGNAL_PEPTIDE	Signal peptide region	1	34	-	29-08-2024	-	-
Fxa4Ag102889.1	a36e94a1a2bc4cc1ab958a9819a38ddb	347	Phobius	NON_CYTOPLASMIC_DOMAIN	Region of a membrane-bound protein predicted to be outside the membrane, in the extracellular region.	35	347	-	29-08-2024	-	-
Fxa4Ag102889.1	a36e94a1a2bc4cc1ab958a9819a38ddb	347	Phobius	SIGNAL_PEPTIDE_H_REGION	Hydrophobic region of a signal peptide.	16	27	-	29-08-2024	-	-
Fxa5Cg202128.1	d427576f614566f75bfb5279c023c70c	270	Pfam	PF07983	X8 domain	183	253	4.6e-15	29-08-2024	IPR012946	X8 domain
Fxa5Cg202128.1	d427576f614566f75bfb5279c023c70c	270	Pfam	PF00332	Glycosyl hydrolases family 17	15	151	2.2e-31	29-08-2024	IPR000490	Glycoside hydrolase family 17
Fxa1Ag102194.1	6167e7cfabe9c336bba719f4079a106e	188	Phobius	NON_CYTOPLASMIC_DOMAIN	Region of a membrane-bound protein predicted to be outside the membrane, in the extracellular region.	1	165	-	29-08-2024	-	-
Fxa1Ag102194.1	6167e7cfabe9c336bba719f4079a106e	188	Phobius	CYTOPLASMIC_DOMAIN	Region of a membrane-bound protein predicted to be outside the membrane, in the cytoplasm.	187	188	-	29-08-2024	-	-
Fxa1Ag102194.1	6167e7cfabe9c336bba719f4079a106e	188	Phobius	TRANSMEMBRANE	Region of a membrane-bound protein predicted to be embedded in the membrane.	166	186	-	29-08-2024	-	-
Fxa1Ag102194.1	6167e7cfabe9c336bba719f4079a106e	188	Pfam	PF00332	Glycosyl hydrolases family 17	12	130	4.2e-25	29-08-2024	IPR000490	Glycoside hydrolase family 17
Fxa1Dg202626.1	bb065664313037e31a4c033fb656171e	576	Pfam	PF00332	Glycosyl hydrolases family 17	119	440	1.9e-61	29-08-2024	IPR000490	Glycoside hydrolase family 17
Fxa1Dg202626.1	bb065664313037e31a4c033fb656171e	576	Phobius	NON_CYTOPLASMIC_DOMAIN	Region of a membrane-bound protein predicted to be outside the membrane, in the extracellular region.	1	11	-	29-08-2024	-	-
Fxa1Dg202626.1	bb065664313037e31a4c033fb656171e	576	Phobius	NON_CYTOPLASMIC_DOMAIN	Region of a membrane-bound protein predicted to be outside the membrane, in the extracellular region.	115	554	-	29-08-2024	-	-
Fxa1Dg202626.1	bb065664313037e31a4c033fb656171e	576	Pfam	PF07983	X8 domain	462	532	2.7e-12	29-08-2024	IPR012946	X8 domain
Fxa1Dg202626.1	bb065664313037e31a4c033fb656171e	576	Phobius	TRANSMEMBRANE	Region of a membrane-bound protein predicted to be embedded in the membrane.	555	575	-	29-08-2024	-	-
Fxa1Dg202626.1	bb065664313037e31a4c033fb656171e	576	Phobius	TRANSMEMBRANE	Region of a membrane-bound protein predicted to be embedded in the membrane.	95	114	-	29-08-2024	-	-
Fxa1Dg202626.1	bb065664313037e31a4c033fb656171e	576	Phobius	CYTOPLASMIC_DOMAIN	Region of a membrane-bound protein predicted to be outside the membrane, in the cytoplasm.	39	94	-	29-08-2024	-	-
Fxa1Dg202626.1	bb065664313037e31a4c033fb656171e	576	Phobius	TRANSMEMBRANE	Region of a membrane-bound protein predicted to be embedded in the membrane.	12	38	-	29-08-2024	-	-
Fxa1Dg202626.1	bb065664313037e31a4c033fb656171e	576	Phobius	CYTOPLASMIC_DOMAIN	Region of a membrane-bound protein predicted to be outside the membrane, in the cytoplasm.	576	576	-	29-08-2024	-	-
Fxa1Bg202766.1	79cd1f96f20d9111befb0f40fa19cecb	504	Phobius	NON_CYTOPLASMIC_DOMAIN	Region of a membrane-bound protein predicted to be outside the membrane, in the extracellular region.	27	504	-	29-08-2024	-	-
Fxa1Bg202766.1	79cd1f96f20d9111befb0f40fa19cecb	504	Phobius	SIGNAL_PEPTIDE_H_REGION	Hydrophobic region of a signal peptide.	11	21	-	29-08-2024	-	-
Fxa1Bg202766.1	79cd1f96f20d9111befb0f40fa19cecb	504	Pfam	PF07983	X8 domain	369	439	1.6e-14	29-08-2024	IPR012946	X8 domain
Fxa1Bg202766.1	79cd1f96f20d9111befb0f40fa19cecb	504	Phobius	SIGNAL_PEPTIDE	Signal peptide region	1	26	-	29-08-2024	-	-
Fxa1Bg202766.1	79cd1f96f20d9111befb0f40fa19cecb	504	Phobius	SIGNAL_PEPTIDE_C_REGION	C-terminal region of a signal peptide.	22	26	-	29-08-2024	-	-
Fxa1Bg202766.1	79cd1f96f20d9111befb0f40fa19cecb	504	Pfam	PF00332	Glycosyl hydrolases family 17	32	351	7.6e-76	29-08-2024	IPR000490	Glycoside hydrolase family 17
Fxa1Bg202766.1	79cd1f96f20d9111befb0f40fa19cecb	504	Phobius	SIGNAL_PEPTIDE_N_REGION	N-terminal region of a signal peptide.	1	10	-	29-08-2024	-	-
Fxa7Cg102081.1	a41daae2449329c0079a213879755b79	315	Pfam	PF00332	Glycosyl hydrolases family 17	1	198	8.5e-50	29-08-2024	IPR000490	Glycoside hydrolase family 17
Fxa7Cg102081.1	a41daae2449329c0079a213879755b79	315	Pfam	PF07983	X8 domain	230	299	1.6e-17	29-08-2024	IPR012946	X8 domain
Fxa2Cg200158.1	2eab738ec107c0b5617056a3d3b0be5a	488	Phobius	NON_CYTOPLASMIC_DOMAIN	Region of a membrane-bound protein predicted to be outside the membrane, in the extracellular region.	23	488	-	29-08-2024	-	-
Fxa2Cg200158.1	2eab738ec107c0b5617056a3d3b0be5a	488	MobiDBLite	mobidb-lite	consensus disorder prediction	348	385	-	29-08-2024	-	-
Fxa2Cg200158.1	2eab738ec107c0b5617056a3d3b0be5a	488	Phobius	SIGNAL_PEPTIDE_C_REGION	C-terminal region of a signal peptide.	15	22	-	29-08-2024	-	-
Fxa2Cg200158.1	2eab738ec107c0b5617056a3d3b0be5a	488	Pfam	PF07983	X8 domain	392	462	5.3e-17	29-08-2024	IPR012946	X8 domain
Fxa2Cg200158.1	2eab738ec107c0b5617056a3d3b0be5a	488	Phobius	SIGNAL_PEPTIDE_N_REGION	N-terminal region of a signal peptide.	1	2	-	29-08-2024	-	-
Fxa2Cg200158.1	2eab738ec107c0b5617056a3d3b0be5a	488	MobiDBLite	mobidb-lite	consensus disorder prediction	358	382	-	29-08-2024	-	-
Fxa2Cg200158.1	2eab738ec107c0b5617056a3d3b0be5a	488	Phobius	SIGNAL_PEPTIDE_H_REGION	Hydrophobic region of a signal peptide.	3	14	-	29-08-2024	-	-
Fxa2Cg200158.1	2eab738ec107c0b5617056a3d3b0be5a	488	Phobius	SIGNAL_PEPTIDE	Signal peptide region	1	22	-	29-08-2024	-	-
Fxa2Cg200158.1	2eab738ec107c0b5617056a3d3b0be5a	488	Pfam	PF00332	Glycosyl hydrolases family 17	26	343	7.5e-76	29-08-2024	IPR000490	Glycoside hydrolase family 17
Fxa3Dg202624.1	73c79c77703bb354f9728f773837de2f	201	MobiDBLite	mobidb-lite	consensus disorder prediction	146	168	-	29-08-2024	-	-
Fxa3Bg202425.1	8b8ef46251bf72f316cf2ef01dad578f	322	Pfam	PF00332	Glycosyl hydrolases family 17	12	321	2.6e-106	29-08-2024	IPR000490	Glycoside hydrolase family 17
Fxa6Ag102400.1	fed444a0c5d9f428aa0a5131e71ff1e4	347	Phobius	SIGNAL_PEPTIDE_N_REGION	N-terminal region of a signal peptide.	1	17	-	29-08-2024	-	-
Fxa6Ag102400.1	fed444a0c5d9f428aa0a5131e71ff1e4	347	Phobius	SIGNAL_PEPTIDE	Signal peptide region	1	34	-	29-08-2024	-	-
Fxa6Ag102400.1	fed444a0c5d9f428aa0a5131e71ff1e4	347	Phobius	SIGNAL_PEPTIDE_C_REGION	C-terminal region of a signal peptide.	30	34	-	29-08-2024	-	-
Fxa6Ag102400.1	fed444a0c5d9f428aa0a5131e71ff1e4	347	Phobius	NON_CYTOPLASMIC_DOMAIN	Region of a membrane-bound protein predicted to be outside the membrane, in the extracellular region.	35	347	-	29-08-2024	-	-
Fxa6Ag102400.1	fed444a0c5d9f428aa0a5131e71ff1e4	347	Pfam	PF00332	Glycosyl hydrolases family 17	36	346	1.1e-103	29-08-2024	IPR000490	Glycoside hydrolase family 17
Fxa6Ag102400.1	fed444a0c5d9f428aa0a5131e71ff1e4	347	Phobius	SIGNAL_PEPTIDE_H_REGION	Hydrophobic region of a signal peptide.	18	29	-	29-08-2024	-	-

## Sheet: PR3
Protein	Run	Length	Prediction	Identifier	Description	Start	End	E-value	Date	InterPro ID	Description
Fxa4Ag100974.1	0ba3d894f3bb797cc473620026c4d9a4	275	Phobius	SIGNAL_PEPTIDE	Signal peptide region	1	28	-	2024-10-09	-	-
Fxa4Ag100974.1	0ba3d894f3bb797cc473620026c4d9a4	275	Pfam	PF00182	Chitinase class I	228	275	1.5e-06	2024-10-09	IPR000726	Glycoside hydrolase, family 19, catalytic
Fxa4Ag100974.1	0ba3d894f3bb797cc473620026c4d9a4	275	Pfam	PF00182	Chitinase class I	79	221	4.4e-35	2024-10-09	IPR000726	Glycoside hydrolase, family 19, catalytic
Fxa4Ag100974.1	0ba3d894f3bb797cc473620026c4d9a4	275	Phobius	SIGNAL_PEPTIDE_H_REGION	Hydrophobic region of a signal peptide.	11	22	-	2024-10-09	-	-
Fxa4Ag100974.1	0ba3d894f3bb797cc473620026c4d9a4	275	Phobius	SIGNAL_PEPTIDE_C_REGION	C-terminal region of a signal peptide.	23	28	-	2024-10-09	-	-
Fxa4Ag100974.1	0ba3d894f3bb797cc473620026c4d9a4	275	Pfam	PF00187	Chitin recognition protein	28	61	0.00047	2024-10-09	IPR001002	Chitin-binding, type 1
Fxa4Ag100974.1	0ba3d894f3bb797cc473620026c4d9a4	275	Phobius	NON_CYTOPLASMIC_DOMAIN	Region of a membrane-bound protein predicted to be outside the membrane, in the extracellular region.	29	275	-	2024-10-09	-	-
Fxa4Ag100974.1	0ba3d894f3bb797cc473620026c4d9a4	275	Phobius	SIGNAL_PEPTIDE_N_REGION	N-terminal region of a signal peptide.	1	10	-	2024-10-09	-	-
Fxa1Ag100972.1	a80f5b8abdebfc43126ba6af81fef1f0	1016	Phobius	NON_CYTOPLASMIC_DOMAIN	Region of a membrane-bound protein predicted to be outside the membrane, in the extracellular region.	1	391	-	2024-10-09	-	-
Fxa1Ag100972.1	a80f5b8abdebfc43126ba6af81fef1f0	1016	Phobius	CYTOPLASMIC_DOMAIN	Region of a membrane-bound protein predicted to be outside the membrane, in the cytoplasm.	412	686	-	2024-10-09	-	-
Fxa1Ag100972.1	a80f5b8abdebfc43126ba6af81fef1f0	1016	Pfam	PF00182	Chitinase class I	775	1006	8e-118	2024-10-09	IPR000726	Glycoside hydrolase, family 19, catalytic
Fxa1Ag100972.1	a80f5b8abdebfc43126ba6af81fef1f0	1016	Pfam	PF00182	Chitinase class I	1	221	1.2e-118	2024-10-09	IPR000726	Glycoside hydrolase, family 19, catalytic
Fxa1Ag100972.1	a80f5b8abdebfc43126ba6af81fef1f0	1016	Pfam	PF00182	Chitinase class I	238	395	2.4e-82	2024-10-09	IPR000726	Glycoside hydrolase, family 19, catalytic
Fxa1Ag100972.1	a80f5b8abdebfc43126ba6af81fef1f0	1016	Pfam	PF00182	Chitinase class I	471	694	4.2e-122	2024-10-09	IPR000726	Glycoside hydrolase, family 19, catalytic
Fxa1Ag100972.1	a80f5b8abdebfc43126ba6af81fef1f0	1016	Pfam	PF00187	Chitin recognition protein	711	748	7.1e-11	2024-10-09	IPR001002	Chitin-binding, type 1
Fxa1Ag100972.1	a80f5b8abdebfc43126ba6af81fef1f0	1016	Pfam	PF00187	Chitin recognition protein	413	450	6e-10	2024-10-09	IPR001002	Chitin-binding, type 1
Fxa1Ag100972.1	a80f5b8abdebfc43126ba6af81fef1f0	1016	Phobius	TRANSMEMBRANE	Region of a membrane-bound protein predicted to be embedded in the membrane.	392	411	-	2024-10-09	-	-
Fxa1Ag100972.1	a80f5b8abdebfc43126ba6af81fef1f0	1016	Phobius	TRANSMEMBRANE	Region of a membrane-bound protein predicted to be embedded in the membrane.	687	707	-	2024-10-09	-	-
Fxa1Ag100972.1	a80f5b8abdebfc43126ba6af81fef1f0	1016	Phobius	NON_CYTOPLASMIC_DOMAIN	Region of a membrane-bound protein predicted to be outside the membrane, in the extracellular region.	708	1016	-	2024-10-09	-	-
Fxa2Bg201460.1	1905399cc3d623edf43c3e49b0caa9bb	330	Phobius	SIGNAL_PEPTIDE_N_REGION	N-terminal region of a signal peptide.	1	3	-	2024-10-09	-	-
Fxa2Bg201460.1	1905399cc3d623edf43c3e49b0caa9bb	330	Phobius	SIGNAL_PEPTIDE_H_REGION	Hydrophobic region of a signal peptide.	4	15	-	2024-10-09	-	-
Fxa2Bg201460.1	1905399cc3d623edf43c3e49b0caa9bb	330	Phobius	SIGNAL_PEPTIDE_C_REGION	C-terminal region of a signal peptide.	16	22	-	2024-10-09	-	-
Fxa2Bg201460.1	1905399cc3d623edf43c3e49b0caa9bb	330	Phobius	NON_CYTOPLASMIC_DOMAIN	Region of a membrane-bound protein predicted to be outside the membrane, in the extracellular region.	23	330	-	2024-10-09	-	-
Fxa2Bg201460.1	1905399cc3d623edf43c3e49b0caa9bb	330	Pfam	PF00182	Chitinase class I	76	306	2.7e-124	2024-10-09	IPR000726	Glycoside hydrolase, family 19, catalytic
Fxa2Bg201460.1	1905399cc3d623edf43c3e49b0caa9bb	330	Pfam	PF00187	Chitin recognition protein	24	61	1.3e-09	2024-10-09	IPR001002	Chitin-binding, type 1
Fxa2Bg201460.1	1905399cc3d623edf43c3e49b0caa9bb	330	Phobius	SIGNAL_PEPTIDE	Signal peptide region	1	22	-	2024-10-09	-	-
P17514_PR3_N.tabacum	183cf3a077e257275bb07a23c3398111	253	Phobius	SIGNAL_PEPTIDE_H_REGION	Hydrophobic region of a signal peptide.	9	19	-	2024-10-09	-	-
P17514_PR3_N.tabacum	183cf3a077e257275bb07a23c3398111	253	Pfam	PF00182	Chitinase class I	30	244	1.2e-110	2024-10-09	IPR000726	Glycoside hydrolase, family 19, catalytic
P17514_PR3_N.tabacum	183cf3a077e257275bb07a23c3398111	253	Phobius	NON_CYTOPLASMIC_DOMAIN	Region of a membrane-bound protein predicted to be outside the membrane, in the extracellular region.	25	253	-	2024-10-09	-	-
P17514_PR3_N.tabacum	183cf3a077e257275bb07a23c3398111	253	Phobius	SIGNAL_PEPTIDE_C_REGION	C-terminal region of a signal peptide.	20	24	-	2024-10-09	-	-
P17514_PR3_N.tabacum	183cf3a077e257275bb07a23c3398111	253	Phobius	SIGNAL_PEPTIDE	Signal peptide region	1	24	-	2024-10-09	-	-
P17514_PR3_N.tabacum	183cf3a077e257275bb07a23c3398111	253	Phobius	SIGNAL_PEPTIDE_N_REGION	N-terminal region of a signal peptide.	1	8	-	2024-10-09	-	-
Fxa4Ag101928.1	7d1ca043b18caf042b283cd93f409c6c	323	Phobius	SIGNAL_PEPTIDE_N_REGION	N-terminal region of a signal peptide.	1	4	-	2024-10-09	-	-
Fxa4Ag101928.1	7d1ca043b18caf042b283cd93f409c6c	323	Pfam	PF00182	Chitinase class I	69	295	5.2e-57	2024-10-09	IPR000726	Glycoside hydrolase, family 19, catalytic
Fxa4Ag101928.1	7d1ca043b18caf042b283cd93f409c6c	323	Phobius	SIGNAL_PEPTIDE_C_REGION	C-terminal region of a signal peptide.	17	21	-	2024-10-09	-	-
Fxa4Ag101928.1	7d1ca043b18caf042b283cd93f409c6c	323	Phobius	SIGNAL_PEPTIDE_H_REGION	Hydrophobic region of a signal peptide.	5	16	-	2024-10-09	-	-
Fxa4Ag101928.1	7d1ca043b18caf042b283cd93f409c6c	323	Phobius	NON_CYTOPLASMIC_DOMAIN	Region of a membrane-bound protein predicted to be outside the membrane, in the extracellular region.	22	323	-	2024-10-09	-	-
Fxa4Ag101928.1	7d1ca043b18caf042b283cd93f409c6c	323	Phobius	SIGNAL_PEPTIDE	Signal peptide region	1	21	-	2024-10-09	-	-
Fxa1Dg202299.1	9738b38a3599c1c2200538c913fad5ec	278	Pfam	PF00182	Chitinase class I	40	272	9.3e-104	2024-10-09	IPR000726	Glycoside hydrolase, family 19, catalytic
Fxa1Dg202299.1	9738b38a3599c1c2200538c913fad5ec	278	Phobius	SIGNAL_PEPTIDE	Signal peptide region	1	34	-	2024-10-09	-	-
Fxa1Dg202299.1	9738b38a3599c1c2200538c913fad5ec	278	Phobius	SIGNAL_PEPTIDE_H_REGION	Hydrophobic region of a signal peptide.	6	25	-	2024-10-09	-	-
Fxa1Dg202299.1	9738b38a3599c1c2200538c913fad5ec	278	Phobius	NON_CYTOPLASMIC_DOMAIN	Region of a membrane-bound protein predicted to be outside the membrane, in the extracellular region.	35	278	-	2024-10-09	-	-
Fxa1Dg202299.1	9738b38a3599c1c2200538c913fad5ec	278	Phobius	SIGNAL_PEPTIDE_N_REGION	N-terminal region of a signal peptide.	1	5	-	2024-10-09	-	-
Fxa1Dg202299.1	9738b38a3599c1c2200538c913fad5ec	278	Phobius	SIGNAL_PEPTIDE_C_REGION	C-terminal region of a signal peptide.	26	34	-	2024-10-09	-	-
Fxa4Cg201637.1	a06d16b915c340a3a52fa20f640d10f2	371	Pfam	PF00182	Chitinase class I	120	346	2.5e-57	2024-10-09	IPR000726	Glycoside hydrolase, family 19, catalytic
Fxa4Ag100976.1	af391e392e1c75f2e8ecdcb05906a460	228	Phobius	SIGNAL_PEPTIDE	Signal peptide region	1	24	-	2024-10-09	-	-
Fxa4Ag100976.1	af391e392e1c75f2e8ecdcb05906a460	228	Phobius	SIGNAL_PEPTIDE_H_REGION	Hydrophobic region of a signal peptide.	6	17	-	2024-10-09	-	-
Fxa4Ag100976.1	af391e392e1c75f2e8ecdcb05906a460	228	Pfam	PF00182	Chitinase class I	31	174	1.1e-38	2024-10-09	IPR000726	Glycoside hydrolase, family 19, catalytic
Fxa4Ag100976.1	af391e392e1c75f2e8ecdcb05906a460	228	Pfam	PF00182	Chitinase class I	181	228	5e-05	2024-10-09	IPR000726	Glycoside hydrolase, family 19, catalytic
Fxa4Ag100976.1	af391e392e1c75f2e8ecdcb05906a460	228	Phobius	SIGNAL_PEPTIDE_C_REGION	C-terminal region of a signal peptide.	18	24	-	2024-10-09	-	-
Fxa4Ag100976.1	af391e392e1c75f2e8ecdcb05906a460	228	Phobius	SIGNAL_PEPTIDE_N_REGION	N-terminal region of a signal peptide.	1	5	-	2024-10-09	-	-
Fxa4Ag100976.1	af391e392e1c75f2e8ecdcb05906a460	228	Phobius	NON_CYTOPLASMIC_DOMAIN	Region of a membrane-bound protein predicted to be outside the membrane, in the extracellular region.	25	228	-	2024-10-09	-	-
Fxa6Dg102872.1	0a9582891b3e5b6ec73abeecafc6ab75	65	Phobius	NON_CYTOPLASMIC_DOMAIN	Region of a membrane-bound protein predicted to be outside the membrane, in the extracellular region.	57	65	-	2024-10-09	-	-
Fxa6Dg102872.1	0a9582891b3e5b6ec73abeecafc6ab75	65	Phobius	CYTOPLASMIC_DOMAIN	Region of a membrane-bound protein predicted to be outside the membrane, in the cytoplasm.	1	33	-	2024-10-09	-	-
Fxa6Dg102872.1	0a9582891b3e5b6ec73abeecafc6ab75	65	Phobius	TRANSMEMBRANE	Region of a membrane-bound protein predicted to be embedded in the membrane.	34	56	-	2024-10-09	-	-
Fxa4Dg101479.1	63f36167760139be66a72ab4847d5834	374	Pfam	PF00182	Chitinase class I	120	346	2.8e-56	2024-10-09	IPR000726	Glycoside hydrolase, family 19, catalytic
Fxa4Dg100808.1	4d7a9e3cd79ce6b8b7985f789ddbdb54	283	Phobius	SIGNAL_PEPTIDE_C_REGION	C-terminal region of a signal peptide.	31	35	-	2024-10-09	-	-
Fxa4Dg100808.1	4d7a9e3cd79ce6b8b7985f789ddbdb54	283	Phobius	SIGNAL_PEPTIDE	Signal peptide region	1	35	-	2024-10-09	-	-
Fxa4Dg100808.1	4d7a9e3cd79ce6b8b7985f789ddbdb54	283	Pfam	PF00182	Chitinase class I	236	283	3.9e-05	2024-10-09	IPR000726	Glycoside hydrolase, family 19, catalytic
Fxa4Dg100808.1	4d7a9e3cd79ce6b8b7985f789ddbdb54	283	Pfam	PF00182	Chitinase class I	85	230	6.1e-35	2024-10-09	IPR000726	Glycoside hydrolase, family 19, catalytic
Fxa4Dg100808.1	4d7a9e3cd79ce6b8b7985f789ddbdb54	283	Phobius	SIGNAL_PEPTIDE_N_REGION	N-terminal region of a signal peptide.	1	15	-	2024-10-09	-	-
Fxa4Dg100808.1	4d7a9e3cd79ce6b8b7985f789ddbdb54	283	Pfam	PF00187	Chitin recognition protein	35	68	9.4e-05	2024-10-09	IPR001002	Chitin-binding, type 1
Fxa4Dg100808.1	4d7a9e3cd79ce6b8b7985f789ddbdb54	283	Phobius	NON_CYTOPLASMIC_DOMAIN	Region of a membrane-bound protein predicted to be outside the membrane, in the extracellular region.	36	283	-	2024-10-09	-	-
Fxa4Dg100808.1	4d7a9e3cd79ce6b8b7985f789ddbdb54	283	Phobius	SIGNAL_PEPTIDE_H_REGION	Hydrophobic region of a signal peptide.	16	30	-	2024-10-09	-	-
Fxa4Cg200577.1	75e63c9b14cb5980cb7f0fbe9983f3db	245	Pfam	PF00182	Chitinase class I	31	191	1.1e-40	2024-10-09	IPR000726	Glycoside hydrolase, family 19, catalytic
Fxa4Cg200577.1	75e63c9b14cb5980cb7f0fbe9983f3db	245	Pfam	PF00182	Chitinase class I	198	245	5.7e-05	2024-10-09	IPR000726	Glycoside hydrolase, family 19, catalytic
Fxa4Cg200577.1	75e63c9b14cb5980cb7f0fbe9983f3db	245	Phobius	NON_CYTOPLASMIC_DOMAIN	Region of a membrane-bound protein predicted to be outside the membrane, in the extracellular region.	25	245	-	2024-10-09	-	-
Fxa4Cg200577.1	75e63c9b14cb5980cb7f0fbe9983f3db	245	Phobius	SIGNAL_PEPTIDE	Signal peptide region	1	24	-	2024-10-09	-	-
Fxa4Cg200577.1	75e63c9b14cb5980cb7f0fbe9983f3db	245	Phobius	SIGNAL_PEPTIDE_H_REGION	Hydrophobic region of a signal peptide.	6	17	-	2024-10-09	-	-
Fxa4Cg200577.1	75e63c9b14cb5980cb7f0fbe9983f3db	245	Phobius	SIGNAL_PEPTIDE_C_REGION	C-terminal region of a signal peptide.	18	24	-	2024-10-09	-	-
Fxa4Cg200577.1	75e63c9b14cb5980cb7f0fbe9983f3db	245	Phobius	SIGNAL_PEPTIDE_N_REGION	N-terminal region of a signal peptide.	1	5	-	2024-10-09	-	-
Fxa4Ag101145.1	3459e4db3867b3a38eea11b9793a45fb	323	Phobius	NON_CYTOPLASMIC_DOMAIN	Region of a membrane-bound protein predicted to be outside the membrane, in the extracellular region.	26	323	-	2024-10-09	-	-
Fxa4Ag101145.1	3459e4db3867b3a38eea11b9793a45fb	323	Phobius	SIGNAL_PEPTIDE	Signal peptide region	1	25	-	2024-10-09	-	-
Fxa4Ag101145.1	3459e4db3867b3a38eea11b9793a45fb	323	Phobius	SIGNAL_PEPTIDE_C_REGION	C-terminal region of a signal peptide.	18	25	-	2024-10-09	-	-
Fxa4Ag101145.1	3459e4db3867b3a38eea11b9793a45fb	323	Pfam	PF00182	Chitinase class I	73	299	3.6e-56	2024-10-09	IPR000726	Glycoside hydrolase, family 19, catalytic
Fxa4Ag101145.1	3459e4db3867b3a38eea11b9793a45fb	323	Phobius	SIGNAL_PEPTIDE_H_REGION	Hydrophobic region of a signal peptide.	6	17	-	2024-10-09	-	-
Fxa4Ag101145.1	3459e4db3867b3a38eea11b9793a45fb	323	Phobius	SIGNAL_PEPTIDE_N_REGION	N-terminal region of a signal peptide.	1	5	-	2024-10-09	-	-
Fxa1Ag100971.1	eee10bc6f4c939b953f59f10ec0aaef3	260	Phobius	SIGNAL_PEPTIDE_N_REGION	N-terminal region of a signal peptide.	1	3	-	2024-10-09	-	-
Fxa1Ag100971.1	eee10bc6f4c939b953f59f10ec0aaef3	260	Phobius	SIGNAL_PEPTIDE_H_REGION	Hydrophobic region of a signal peptide.	4	15	-	2024-10-09	-	-
Fxa1Ag100971.1	eee10bc6f4c939b953f59f10ec0aaef3	260	Pfam	PF00182	Chitinase class I	24	254	3.8e-127	2024-10-09	IPR000726	Glycoside hydrolase, family 19, catalytic
Fxa1Ag100971.1	eee10bc6f4c939b953f59f10ec0aaef3	260	Phobius	NON_CYTOPLASMIC_DOMAIN	Region of a membrane-bound protein predicted to be outside the membrane, in the extracellular region.	20	260	-	2024-10-09	-	-
Fxa1Ag100971.1	eee10bc6f4c939b953f59f10ec0aaef3	260	Phobius	SIGNAL_PEPTIDE	Signal peptide region	1	19	-	2024-10-09	-	-
Fxa1Ag100971.1	eee10bc6f4c939b953f59f10ec0aaef3	260	Phobius	SIGNAL_PEPTIDE_C_REGION	C-terminal region of a signal peptide.	16	19	-	2024-10-09	-	-
Fxa2Dg201423.1	56d13a4be7005dcd6423c56ce7a9a703	374	Phobius	CYTOPLASMIC_DOMAIN	Region of a membrane-bound protein predicted to be outside the membrane, in the cytoplasm.	1	6	-	2024-10-09	-	-
Fxa2Dg201423.1	56d13a4be7005dcd6423c56ce7a9a703	374	Phobius	TRANSMEMBRANE	Region of a membrane-bound protein predicted to be embedded in the membrane.	44	61	-	2024-10-09	-	-
Fxa2Dg201423.1	56d13a4be7005dcd6423c56ce7a9a703	374	Phobius	NON_CYTOPLASMIC_DOMAIN	Region of a membrane-bound protein predicted to be outside the membrane, in the extracellular region.	25	43	-	2024-10-09	-	-
Fxa2Dg201423.1	56d13a4be7005dcd6423c56ce7a9a703	374	Pfam	PF00187	Chitin recognition protein	68	105	1.2e-09	2024-10-09	IPR001002	Chitin-binding, type 1
Fxa2Dg201423.1	56d13a4be7005dcd6423c56ce7a9a703	374	Phobius	TRANSMEMBRANE	Region of a membrane-bound protein predicted to be embedded in the membrane.	7	24	-	2024-10-09	-	-
Fxa2Dg201423.1	56d13a4be7005dcd6423c56ce7a9a703	374	Pfam	PF00182	Chitinase class I	120	350	2e-125	2024-10-09	IPR000726	Glycoside hydrolase, family 19, catalytic
Fxa2Dg201423.1	56d13a4be7005dcd6423c56ce7a9a703	374	Phobius	CYTOPLASMIC_DOMAIN	Region of a membrane-bound protein predicted to be outside the membrane, in the cytoplasm.	62	374	-	2024-10-09	-	-
Fxa4Bg101867.1	2ba223b0343b2def8ff643e59aa1abb9	416	Pfam	PF00182	Chitinase class I	162	388	3.1e-57	2024-10-09	IPR000726	Glycoside hydrolase, family 19, catalytic
Fxa4Bg101163.1	934d8686fc5cfa145ebf476b4a526622	367	Phobius	NON_CYTOPLASMIC_DOMAIN	Region of a membrane-bound protein predicted to be outside the membrane, in the extracellular region.	72	367	-	2024-10-09	-	-
Fxa4Bg101163.1	934d8686fc5cfa145ebf476b4a526622	367	Pfam	PF00182	Chitinase class I	117	343	5.6e-56	2024-10-09	IPR000726	Glycoside hydrolase, family 19, catalytic
Fxa4Bg101163.1	934d8686fc5cfa145ebf476b4a526622	367	Phobius	CYTOPLASMIC_DOMAIN	Region of a membrane-bound protein predicted to be outside the membrane, in the cytoplasm.	1	49	-	2024-10-09	-	-
Fxa4Bg101163.1	934d8686fc5cfa145ebf476b4a526622	367	Phobius	TRANSMEMBRANE	Region of a membrane-bound protein predicted to be embedded in the membrane.	50	71	-	2024-10-09	-	-
Fxa4Cg200580.1	72a02ee0b23c0f8bd2c3ee3714f5b3e0	275	Phobius	SIGNAL_PEPTIDE	Signal peptide region	1	28	-	2024-10-09	-	-
Fxa4Cg200580.1	72a02ee0b23c0f8bd2c3ee3714f5b3e0	275	Pfam	PF00187	Chitin recognition protein	28	61	0.00025	2024-10-09	IPR001002	Chitin-binding, type 1
Fxa4Cg200580.1	72a02ee0b23c0f8bd2c3ee3714f5b3e0	275	Pfam	PF00182	Chitinase class I	228	275	1.5e-06	2024-10-09	IPR000726	Glycoside hydrolase, family 19, catalytic
Fxa4Cg200580.1	72a02ee0b23c0f8bd2c3ee3714f5b3e0	275	Pfam	PF00182	Chitinase class I	79	221	3.6e-35	2024-10-09	IPR000726	Glycoside hydrolase, family 19, catalytic
Fxa4Cg200580.1	72a02ee0b23c0f8bd2c3ee3714f5b3e0	275	Phobius	SIGNAL_PEPTIDE_H_REGION	Hydrophobic region of a signal peptide.	11	22	-	2024-10-09	-	-
Fxa4Cg200580.1	72a02ee0b23c0f8bd2c3ee3714f5b3e0	275	Phobius	SIGNAL_PEPTIDE_C_REGION	C-terminal region of a signal peptide.	23	28	-	2024-10-09	-	-
Fxa4Cg200580.1	72a02ee0b23c0f8bd2c3ee3714f5b3e0	275	Phobius	SIGNAL_PEPTIDE_N_REGION	N-terminal region of a signal peptide.	1	10	-	2024-10-09	-	-
Fxa4Cg200580.1	72a02ee0b23c0f8bd2c3ee3714f5b3e0	275	Phobius	NON_CYTOPLASMIC_DOMAIN	Region of a membrane-bound protein predicted to be outside the membrane, in the extracellular region.	29	275	-	2024-10-09	-	-
Fxa4Cg200892.1	a284c7defdff6cdb188cfaf9d9b29524	211	Phobius	NON_CYTOPLASMIC_DOMAIN	Region of a membrane-bound protein predicted to be outside the membrane, in the extracellular region.	36	211	-	2024-10-09	-	-
Fxa4Cg200892.1	a284c7defdff6cdb188cfaf9d9b29524	211	Pfam	PF00182	Chitinase class I	85	148	1.2e-07	2024-10-09	IPR000726	Glycoside hydrolase, family 19, catalytic
Fxa4Cg200892.1	a284c7defdff6cdb188cfaf9d9b29524	211	Phobius	SIGNAL_PEPTIDE_C_REGION	C-terminal region of a signal peptide.	31	35	-	2024-10-09	-	-
Fxa4Cg200892.1	a284c7defdff6cdb188cfaf9d9b29524	211	Phobius	SIGNAL_PEPTIDE	Signal peptide region	1	35	-	2024-10-09	-	-
Fxa4Cg200892.1	a284c7defdff6cdb188cfaf9d9b29524	211	Phobius	SIGNAL_PEPTIDE_N_REGION	N-terminal region of a signal peptide.	1	15	-	2024-10-09	-	-
Fxa4Cg200892.1	a284c7defdff6cdb188cfaf9d9b29524	211	Pfam	PF00187	Chitin recognition protein	35	68	6.1e-05	2024-10-09	IPR001002	Chitin-binding, type 1
Fxa4Cg200892.1	a284c7defdff6cdb188cfaf9d9b29524	211	Phobius	SIGNAL_PEPTIDE_H_REGION	Hydrophobic region of a signal peptide.	16	30	-	2024-10-09	-	-
Fxa1Dg200848.1	910e0611088ffb0c3555de092d403c0a	75	Pfam	PF00182	Chitinase class I	2	72	1.7e-34	2024-10-09	IPR000726	Glycoside hydrolase, family 19, catalytic
Fxa4Ag100980.1	43ae0d7144c0fac82a2459e6140dcbd7	283	Phobius	SIGNAL_PEPTIDE_C_REGION	C-terminal region of a signal peptide.	31	35	-	2024-10-09	-	-
Fxa4Ag100980.1	43ae0d7144c0fac82a2459e6140dcbd7	283	Phobius	SIGNAL_PEPTIDE	Signal peptide region	1	35	-	2024-10-09	-	-
Fxa4Ag100980.1	43ae0d7144c0fac82a2459e6140dcbd7	283	Phobius	SIGNAL_PEPTIDE_N_REGION	N-terminal region of a signal peptide.	1	15	-	2024-10-09	-	-
Fxa4Ag100980.1	43ae0d7144c0fac82a2459e6140dcbd7	283	Pfam	PF00182	Chitinase class I	85	230	9.7e-36	2024-10-09	IPR000726	Glycoside hydrolase, family 19, catalytic
Fxa4Ag100980.1	43ae0d7144c0fac82a2459e6140dcbd7	283	Pfam	PF00182	Chitinase class I	236	283	1.2e-05	2024-10-09	IPR000726	Glycoside hydrolase, family 19, catalytic
Fxa4Ag100980.1	43ae0d7144c0fac82a2459e6140dcbd7	283	Pfam	PF00187	Chitin recognition protein	35	68	9.4e-05	2024-10-09	IPR001002	Chitin-binding, type 1
Fxa4Ag100980.1	43ae0d7144c0fac82a2459e6140dcbd7	283	Phobius	NON_CYTOPLASMIC_DOMAIN	Region of a membrane-bound protein predicted to be outside the membrane, in the extracellular region.	36	283	-	2024-10-09	-	-
Fxa4Ag100980.1	43ae0d7144c0fac82a2459e6140dcbd7	283	Phobius	SIGNAL_PEPTIDE_H_REGION	Hydrophobic region of a signal peptide.	16	30	-	2024-10-09	-	-
Fxa1Cg100920.1	803132a1740c23a7a9145fcfcab9e6df	398	Pfam	PF00182	Chitinase class I	256	391	5.9e-68	2024-10-09	IPR000726	Glycoside hydrolase, family 19, catalytic
Fxa1Cg100920.1	803132a1740c23a7a9145fcfcab9e6df	398	Pfam	PF00182	Chitinase class I	24	252	1.7e-122	2024-10-09	IPR000726	Glycoside hydrolase, family 19, catalytic
Fxa1Cg100920.1	803132a1740c23a7a9145fcfcab9e6df	398	Phobius	NON_CYTOPLASMIC_DOMAIN	Region of a membrane-bound protein predicted to be outside the membrane, in the extracellular region.	20	398	-	2024-10-09	-	-
Fxa1Cg100920.1	803132a1740c23a7a9145fcfcab9e6df	398	Phobius	SIGNAL_PEPTIDE_H_REGION	Hydrophobic region of a signal peptide.	4	15	-	2024-10-09	-	-
Fxa1Cg100920.1	803132a1740c23a7a9145fcfcab9e6df	398	Phobius	SIGNAL_PEPTIDE_N_REGION	N-terminal region of a signal peptide.	1	3	-	2024-10-09	-	-
Fxa1Cg100920.1	803132a1740c23a7a9145fcfcab9e6df	398	Phobius	SIGNAL_PEPTIDE	Signal peptide region	1	19	-	2024-10-09	-	-
Fxa1Cg100920.1	803132a1740c23a7a9145fcfcab9e6df	398	Phobius	SIGNAL_PEPTIDE_C_REGION	C-terminal region of a signal peptide.	16	19	-	2024-10-09	-	-
Fxa2Ag101657.1	8158fd8b3cd83b5ebe4195cb713d04c5	347	Pfam	PF00182	Chitinase class I	93	323	2.7e-126	2024-10-09	IPR000726	Glycoside hydrolase, family 19, catalytic
Fxa2Ag101657.1	8158fd8b3cd83b5ebe4195cb713d04c5	347	Phobius	SIGNAL_PEPTIDE	Signal peptide region	1	39	-	2024-10-09	-	-
Fxa2Ag101657.1	8158fd8b3cd83b5ebe4195cb713d04c5	347	Phobius	SIGNAL_PEPTIDE_C_REGION	C-terminal region of a signal peptide.	33	39	-	2024-10-09	-	-
Fxa2Ag101657.1	8158fd8b3cd83b5ebe4195cb713d04c5	347	Phobius	SIGNAL_PEPTIDE_N_REGION	N-terminal region of a signal peptide.	1	20	-	2024-10-09	-	-
Fxa2Ag101657.1	8158fd8b3cd83b5ebe4195cb713d04c5	347	Phobius	SIGNAL_PEPTIDE_H_REGION	Hydrophobic region of a signal peptide.	21	32	-	2024-10-09	-	-
Fxa2Ag101657.1	8158fd8b3cd83b5ebe4195cb713d04c5	347	Pfam	PF00187	Chitin recognition protein	41	78	9.5e-10	2024-10-09	IPR001002	Chitin-binding, type 1
Fxa2Ag101657.1	8158fd8b3cd83b5ebe4195cb713d04c5	347	Phobius	NON_CYTOPLASMIC_DOMAIN	Region of a membrane-bound protein predicted to be outside the membrane, in the extracellular region.	40	347	-	2024-10-09	-	-
Fxa1Ag102473.1	ad297dd76ec8cc65e521d2f98e3640ab	274	Pfam	PF00182	Chitinase class I	36	268	2.9e-102	2024-10-09	IPR000726	Glycoside hydrolase, family 19, catalytic
Fxa1Ag102473.1	ad297dd76ec8cc65e521d2f98e3640ab	274	Phobius	SIGNAL_PEPTIDE_N_REGION	N-terminal region of a signal peptide.	1	9	-	2024-10-09	-	-
Fxa1Ag102473.1	ad297dd76ec8cc65e521d2f98e3640ab	274	Phobius	SIGNAL_PEPTIDE_H_REGION	Hydrophobic region of a signal peptide.	10	21	-	2024-10-09	-	-
Fxa1Ag102473.1	ad297dd76ec8cc65e521d2f98e3640ab	274	Phobius	NON_CYTOPLASMIC_DOMAIN	Region of a membrane-bound protein predicted to be outside the membrane, in the extracellular region.	31	274	-	2024-10-09	-	-
Fxa1Ag102473.1	ad297dd76ec8cc65e521d2f98e3640ab	274	Phobius	SIGNAL_PEPTIDE	Signal peptide region	1	30	-	2024-10-09	-	-
Fxa1Ag102473.1	ad297dd76ec8cc65e521d2f98e3640ab	274	Phobius	SIGNAL_PEPTIDE_C_REGION	C-terminal region of a signal peptide.	22	30	-	2024-10-09	-	-
Fxa1Bg202343.1	c8a25aaff2792668c83755be98254daf	194	Phobius	SIGNAL_PEPTIDE_N_REGION	N-terminal region of a signal peptide.	1	9	-	2024-10-09	-	-
Fxa1Bg202343.1	c8a25aaff2792668c83755be98254daf	194	Phobius	SIGNAL_PEPTIDE_H_REGION	Hydrophobic region of a signal peptide.	10	21	-	2024-10-09	-	-
Fxa1Bg202343.1	c8a25aaff2792668c83755be98254daf	194	Phobius	NON_CYTOPLASMIC_DOMAIN	Region of a membrane-bound protein predicted to be outside the membrane, in the extracellular region.	31	194	-	2024-10-09	-	-
Fxa1Bg202343.1	c8a25aaff2792668c83755be98254daf	194	Phobius	SIGNAL_PEPTIDE	Signal peptide region	1	30	-	2024-10-09	-	-
Fxa1Bg202343.1	c8a25aaff2792668c83755be98254daf	194	Phobius	SIGNAL_PEPTIDE_C_REGION	C-terminal region of a signal peptide.	22	30	-	2024-10-09	-	-
Fxa1Bg202343.1	c8a25aaff2792668c83755be98254daf	194	Pfam	PF00182	Chitinase class I	36	103	1.8e-20	2024-10-09	IPR000726	Glycoside hydrolase, family 19, catalytic
Fxa1Bg202343.1	c8a25aaff2792668c83755be98254daf	194	Pfam	PF00182	Chitinase class I	107	194	3.8e-34	2024-10-09	IPR000726	Glycoside hydrolase, family 19, catalytic
Fxa1Dg200849.1	0f19de57283f5f7b3e7354ff22fcda9d	628	Phobius	NON_CYTOPLASMIC_DOMAIN	Region of a membrane-bound protein predicted to be outside the membrane, in the extracellular region.	20	628	-	2024-10-09	-	-
Fxa1Dg200849.1	0f19de57283f5f7b3e7354ff22fcda9d	628	Phobius	SIGNAL_PEPTIDE	Signal peptide region	1	19	-	2024-10-09	-	-
Fxa1Dg200849.1	0f19de57283f5f7b3e7354ff22fcda9d	628	Pfam	PF00182	Chitinase class I	383	618	5e-120	2024-10-09	IPR000726	Glycoside hydrolase, family 19, catalytic
Fxa1Dg200849.1	0f19de57283f5f7b3e7354ff22fcda9d	628	Pfam	PF00182	Chitinase class I	79	302	8.5e-123	2024-10-09	IPR000726	Glycoside hydrolase, family 19, catalytic
Fxa1Dg200849.1	0f19de57283f5f7b3e7354ff22fcda9d	628	Pfam	PF00187	Chitin recognition protein	21	58	9.7e-11	2024-10-09	IPR001002	Chitin-binding, type 1
Fxa1Dg200849.1	0f19de57283f5f7b3e7354ff22fcda9d	628	Pfam	PF00187	Chitin recognition protein	319	356	2.1e-11	2024-10-09	IPR001002	Chitin-binding, type 1
Fxa1Dg200849.1	0f19de57283f5f7b3e7354ff22fcda9d	628	Phobius	SIGNAL_PEPTIDE_H_REGION	Hydrophobic region of a signal peptide.	5	15	-	2024-10-09	-	-
Fxa1Dg200849.1	0f19de57283f5f7b3e7354ff22fcda9d	628	Phobius	SIGNAL_PEPTIDE_N_REGION	N-terminal region of a signal peptide.	1	4	-	2024-10-09	-	-
Fxa1Dg200849.1	0f19de57283f5f7b3e7354ff22fcda9d	628	Phobius	SIGNAL_PEPTIDE_C_REGION	C-terminal region of a signal peptide.	16	19	-	2024-10-09	-	-
Fxa4Bg101053.1	59b30ed74a58d49aa13e77c05671555a	283	Phobius	SIGNAL_PEPTIDE_C_REGION	C-terminal region of a signal peptide.	31	35	-	2024-10-09	-	-
Fxa4Bg101053.1	59b30ed74a58d49aa13e77c05671555a	283	Pfam	PF00182	Chitinase class I	236	283	1.3e-05	2024-10-09	IPR000726	Glycoside hydrolase, family 19, catalytic
Fxa4Bg101053.1	59b30ed74a58d49aa13e77c05671555a	283	Pfam	PF00182	Chitinase class I	85	230	7.1e-36	2024-10-09	IPR000726	Glycoside hydrolase, family 19, catalytic
Fxa4Bg101053.1	59b30ed74a58d49aa13e77c05671555a	283	Phobius	SIGNAL_PEPTIDE	Signal peptide region	1	35	-	2024-10-09	-	-
Fxa4Bg101053.1	59b30ed74a58d49aa13e77c05671555a	283	Phobius	SIGNAL_PEPTIDE_N_REGION	N-terminal region of a signal peptide.	1	15	-	2024-10-09	-	-
Fxa4Bg101053.1	59b30ed74a58d49aa13e77c05671555a	283	Pfam	PF00187	Chitin recognition protein	35	68	9.4e-05	2024-10-09	IPR001002	Chitin-binding, type 1
Fxa4Bg101053.1	59b30ed74a58d49aa13e77c05671555a	283	Phobius	NON_CYTOPLASMIC_DOMAIN	Region of a membrane-bound protein predicted to be outside the membrane, in the extracellular region.	36	283	-	2024-10-09	-	-
Fxa4Bg101053.1	59b30ed74a58d49aa13e77c05671555a	283	Phobius	SIGNAL_PEPTIDE_H_REGION	Hydrophobic region of a signal peptide.	16	30	-	2024-10-09	-	-
Fxa5Cg202258.1	a06c0e1280babf40f84db2ab9bc59040	369	Pfam	PF00182	Chitinase class I	132	363	3.5e-102	2024-10-09	IPR000726	Glycoside hydrolase, family 19, catalytic
Fxa5Cg202258.1	a06c0e1280babf40f84db2ab9bc59040	369	Phobius	CYTOPLASMIC_DOMAIN	Region of a membrane-bound protein predicted to be outside the membrane, in the cytoplasm.	1	92	-	2024-10-09	-	-
Fxa5Cg202258.1	a06c0e1280babf40f84db2ab9bc59040	369	Phobius	NON_CYTOPLASMIC_DOMAIN	Region of a membrane-bound protein predicted to be outside the membrane, in the extracellular region.	117	369	-	2024-10-09	-	-
Fxa5Cg202258.1	a06c0e1280babf40f84db2ab9bc59040	369	Phobius	TRANSMEMBRANE	Region of a membrane-bound protein predicted to be embedded in the membrane.	93	116	-	2024-10-09	-	-
Fxa5Bg102410.1	39ca63958d8591d8537cc251bb84180a	369	Pfam	PF00182	Chitinase class I	132	363	2.2e-103	2024-10-09	IPR000726	Glycoside hydrolase, family 19, catalytic
Fxa5Bg102410.1	39ca63958d8591d8537cc251bb84180a	369	Phobius	CYTOPLASMIC_DOMAIN	Region of a membrane-bound protein predicted to be outside the membrane, in the cytoplasm.	1	92	-	2024-10-09	-	-
Fxa5Bg102410.1	39ca63958d8591d8537cc251bb84180a	369	Phobius	NON_CYTOPLASMIC_DOMAIN	Region of a membrane-bound protein predicted to be outside the membrane, in the extracellular region.	117	369	-	2024-10-09	-	-
Fxa5Bg102410.1	39ca63958d8591d8537cc251bb84180a	369	Phobius	TRANSMEMBRANE	Region of a membrane-bound protein predicted to be embedded in the membrane.	93	116	-	2024-10-09	-	-
Fxa4BgPR3_1	5a849b4adb5802a726c0c6aa7f68ef1e	89	Phobius	SIGNAL_PEPTIDE	Signal peptide region	1	25	-	2024-10-09	-	-
Fxa4BgPR3_1	5a849b4adb5802a726c0c6aa7f68ef1e	89	Phobius	SIGNAL_PEPTIDE_N_REGION	N-terminal region of a signal peptide.	1	1	-	2024-10-09	-	-
Fxa4BgPR3_1	5a849b4adb5802a726c0c6aa7f68ef1e	89	Phobius	NON_CYTOPLASMIC_DOMAIN	Region of a membrane-bound protein predicted to be outside the membrane, in the extracellular region.	26	89	-	2024-10-09	-	-
Fxa4BgPR3_1	5a849b4adb5802a726c0c6aa7f68ef1e	89	Phobius	SIGNAL_PEPTIDE_H_REGION	Hydrophobic region of a signal peptide.	2	13	-	2024-10-09	-	-
Fxa4BgPR3_1	5a849b4adb5802a726c0c6aa7f68ef1e	89	Phobius	SIGNAL_PEPTIDE_C_REGION	C-terminal region of a signal peptide.	14	25	-	2024-10-09	-	-
Fxa4BgPR3_1	5a849b4adb5802a726c0c6aa7f68ef1e	89	Pfam	PF00182	Chitinase class I	27	89	9.6e-09	2024-10-09	IPR000726	Glycoside hydrolase, family 19, catalytic
Fxa4Bg101048.1	e1ef5f8bcec59351b80adc25f0044847	141	Pfam	PF00182	Chitinase class I	94	141	4.5e-05	2024-10-09	IPR000726	Glycoside hydrolase, family 19, catalytic
Fxa4Bg101048.1	e1ef5f8bcec59351b80adc25f0044847	141	Pfam	PF00182	Chitinase class I	9	87	2.6e-24	2024-10-09	IPR000726	Glycoside hydrolase, family 19, catalytic
Fxa1Bg200909.1	aeb5644ff1f1b081fb87a625d3020d58	182	Pfam	PF00182	Chitinase class I	1	170	1.2e-75	2024-10-09	IPR000726	Glycoside hydrolase, family 19, catalytic
Fxa4Dg100834.1	225e85b45e269a1b8cdbd95f6391f10a	347	Phobius	SIGNAL_PEPTIDE	Signal peptide region	1	25	-	2024-10-09	-	-
Fxa4Dg100834.1	225e85b45e269a1b8cdbd95f6391f10a	347	Phobius	NON_CYTOPLASMIC_DOMAIN	Region of a membrane-bound protein predicted to be outside the membrane, in the extracellular region.	26	347	-	2024-10-09	-	-
Fxa4Dg100834.1	225e85b45e269a1b8cdbd95f6391f10a	347	Phobius	SIGNAL_PEPTIDE_C_REGION	C-terminal region of a signal peptide.	18	25	-	2024-10-09	-	-
Fxa4Dg100834.1	225e85b45e269a1b8cdbd95f6391f10a	347	Pfam	PF00182	Chitinase class I	73	133	0.0007	2024-10-09	IPR000726	Glycoside hydrolase, family 19, catalytic
Fxa4Dg100834.1	225e85b45e269a1b8cdbd95f6391f10a	347	Pfam	PF00182	Chitinase class I	150	323	1.3e-40	2024-10-09	IPR000726	Glycoside hydrolase, family 19, catalytic
Fxa4Dg100834.1	225e85b45e269a1b8cdbd95f6391f10a	347	Phobius	SIGNAL_PEPTIDE_H_REGION	Hydrophobic region of a signal peptide.	6	17	-	2024-10-09	-	-
Fxa4Dg100834.1	225e85b45e269a1b8cdbd95f6391f10a	347	Phobius	SIGNAL_PEPTIDE_N_REGION	N-terminal region of a signal peptide.	1	5	-	2024-10-09	-	-
Fxa5Ag202498.1	6863c67173ee67018723ba243b0efec5	323	Pfam	PF00182	Chitinase class I	84	317	2.7e-93	2024-10-09	IPR000726	Glycoside hydrolase, family 19, catalytic
Fxa1Cg100919.1	20e4397752dca00408027f69e90ce36b	260	Pfam	PF00182	Chitinase class I	24	254	2e-128	2024-10-09	IPR000726	Glycoside hydrolase, family 19, catalytic
Fxa1Cg100919.1	20e4397752dca00408027f69e90ce36b	260	Phobius	SIGNAL_PEPTIDE_H_REGION	Hydrophobic region of a signal peptide.	4	15	-	2024-10-09	-	-
Fxa1Cg100919.1	20e4397752dca00408027f69e90ce36b	260	Phobius	SIGNAL_PEPTIDE_N_REGION	N-terminal region of a signal peptide.	1	3	-	2024-10-09	-	-
Fxa1Cg100919.1	20e4397752dca00408027f69e90ce36b	260	Phobius	NON_CYTOPLASMIC_DOMAIN	Region of a membrane-bound protein predicted to be outside the membrane, in the extracellular region.	20	260	-	2024-10-09	-	-
Fxa1Cg100919.1	20e4397752dca00408027f69e90ce36b	260	Phobius	SIGNAL_PEPTIDE	Signal peptide region	1	19	-	2024-10-09	-	-
Fxa1Cg100919.1	20e4397752dca00408027f69e90ce36b	260	Phobius	SIGNAL_PEPTIDE_C_REGION	C-terminal region of a signal peptide.	16	19	-	2024-10-09	-	-
Fxa1Cg102516.1	36301b22ef93ebf560fc31136110fb6a	278	Pfam	PF00182	Chitinase class I	40	272	2.5e-103	2024-10-09	IPR000726	Glycoside hydrolase, family 19, catalytic
Fxa1Cg102516.1	36301b22ef93ebf560fc31136110fb6a	278	Phobius	SIGNAL_PEPTIDE	Signal peptide region	1	34	-	2024-10-09	-	-
Fxa1Cg102516.1	36301b22ef93ebf560fc31136110fb6a	278	Phobius	SIGNAL_PEPTIDE_H_REGION	Hydrophobic region of a signal peptide.	6	25	-	2024-10-09	-	-
Fxa1Cg102516.1	36301b22ef93ebf560fc31136110fb6a	278	Phobius	NON_CYTOPLASMIC_DOMAIN	Region of a membrane-bound protein predicted to be outside the membrane, in the extracellular region.	35	278	-	2024-10-09	-	-
Fxa1Cg102516.1	36301b22ef93ebf560fc31136110fb6a	278	Phobius	SIGNAL_PEPTIDE_N_REGION	N-terminal region of a signal peptide.	1	5	-	2024-10-09	-	-
Fxa1Cg102516.1	36301b22ef93ebf560fc31136110fb6a	278	Phobius	SIGNAL_PEPTIDE_C_REGION	C-terminal region of a signal peptide.	26	34	-	2024-10-09	-	-
Fxa5Dg202320.1	fd70cd2b994c586980488f597ebb856d	305	Phobius	SIGNAL_PEPTIDE_H_REGION	Hydrophobic region of a signal peptide.	41	52	-	2024-10-09	-	-
Fxa5Dg202320.1	fd70cd2b994c586980488f597ebb856d	305	Phobius	SIGNAL_PEPTIDE	Signal peptide region	1	61	-	2024-10-09	-	-
Fxa5Dg202320.1	fd70cd2b994c586980488f597ebb856d	305	Phobius	NON_CYTOPLASMIC_DOMAIN	Region of a membrane-bound protein predicted to be outside the membrane, in the extracellular region.	62	305	-	2024-10-09	-	-
Fxa5Dg202320.1	fd70cd2b994c586980488f597ebb856d	305	Pfam	PF00182	Chitinase class I	68	299	7.9e-104	2024-10-09	IPR000726	Glycoside hydrolase, family 19, catalytic
Fxa5Dg202320.1	fd70cd2b994c586980488f597ebb856d	305	Phobius	SIGNAL_PEPTIDE_N_REGION	N-terminal region of a signal peptide.	1	40	-	2024-10-09	-	-
Fxa5Dg202320.1	fd70cd2b994c586980488f597ebb856d	305	Phobius	SIGNAL_PEPTIDE_C_REGION	C-terminal region of a signal peptide.	53	61	-	2024-10-09	-	-

## Sheet: PR4
Protein	Run	Length	Prediction	Identifier	Description	Start	End	E-value	Date	InterPro ID	Description
Fxa6DgPR4_4	d501dbb1deb9444ae9b440b5223fe7ab	59	MobiDBLite	mobidb-lite	consensus disorder prediction	17	43	-	2024-10-09	-	-
Fxa3Ag102499.1	583e5e45630d47988c8dce7df6a293ea	129	Pfam	PF00967	Barwin family	9	127	2.4e-60	2024-10-09	IPR001153	Barwin domain
Fxa6Bg100238.1	bb3a38b1727bce629b952f79387bd453	199	Pfam	PF00967	Barwin family	79	197	3.4e-51	2024-10-09	IPR001153	Barwin domain
Fxa3DgPR4_1.2	74e31c00a687149db6ce7eeb17b2a3c2	61	Pfam	PF00967	Barwin family	1	60	3.4e-10	2024-10-09	IPR001153	Barwin domain
Fxa6AgPR4_2	a02ed8aebf23a0c20e2d6ae94d9810b8	24	Pfam	PF00967	Barwin family	1	23	0.00058	2024-10-09	IPR001153	Barwin domain
Fxa6Cg100242.1	a97d6171da62f35cba040880aea82532	170	Pfam	PF00967	Barwin family	50	168	5e-52	2024-10-09	IPR001153	Barwin domain
Fxa6Cg100242.1	a97d6171da62f35cba040880aea82532	170	Pfam	PF00967	Barwin family	5	39	3.8e-06	2024-10-09	IPR001153	Barwin domain
Fxa3DgPR4_1.1	6de0d22a0014000f02a6e3c3265b3b72	72	Pfam	PF00967	Barwin family	8	57	9e-08	2024-10-09	IPR001153	Barwin domain
Fxa3Bg200514.1	fcc24c57799cbe331878d7704e22052c	145	Phobius	NON_CYTOPLASMIC_DOMAIN	Region of a membrane-bound protein predicted to be outside the membrane, in the extracellular region.	24	145	-	2024-10-09	-	-
Fxa3Bg200514.1	fcc24c57799cbe331878d7704e22052c	145	Phobius	SIGNAL_PEPTIDE_H_REGION	Hydrophobic region of a signal peptide.	6	16	-	2024-10-09	-	-
Fxa3Bg200514.1	fcc24c57799cbe331878d7704e22052c	145	Phobius	SIGNAL_PEPTIDE	Signal peptide region	1	23	-	2024-10-09	-	-
Fxa3Bg200514.1	fcc24c57799cbe331878d7704e22052c	145	Pfam	PF00967	Barwin family	25	143	2.3e-60	2024-10-09	IPR001153	Barwin domain
Fxa3Bg200514.1	fcc24c57799cbe331878d7704e22052c	145	Phobius	SIGNAL_PEPTIDE_N_REGION	N-terminal region of a signal peptide.	1	5	-	2024-10-09	-	-
Fxa3Bg200514.1	fcc24c57799cbe331878d7704e22052c	145	Phobius	SIGNAL_PEPTIDE_C_REGION	C-terminal region of a signal peptide.	17	23	-	2024-10-09	-	-
Fxa6DgPR4_3	c48e376539d17c985ed7a94ca345c979	62	Pfam	PF00967	Barwin family	2	60	1.1e-18	2024-10-09	IPR001153	Barwin domain
Fxa3Ag100552.1	3b508cfaa8fe2ac9b46319e5ef483430	145	Phobius	NON_CYTOPLASMIC_DOMAIN	Region of a membrane-bound protein predicted to be outside the membrane, in the extracellular region.	24	145	-	2024-10-09	-	-
Fxa3Ag100552.1	3b508cfaa8fe2ac9b46319e5ef483430	145	Phobius	SIGNAL_PEPTIDE	Signal peptide region	1	23	-	2024-10-09	-	-
Fxa3Ag100552.1	3b508cfaa8fe2ac9b46319e5ef483430	145	Pfam	PF00967	Barwin family	25	143	8e-60	2024-10-09	IPR001153	Barwin domain
Fxa3Ag100552.1	3b508cfaa8fe2ac9b46319e5ef483430	145	Phobius	SIGNAL_PEPTIDE_C_REGION	C-terminal region of a signal peptide.	16	23	-	2024-10-09	-	-
Fxa3Ag100552.1	3b508cfaa8fe2ac9b46319e5ef483430	145	Phobius	SIGNAL_PEPTIDE_N_REGION	N-terminal region of a signal peptide.	1	3	-	2024-10-09	-	-
Fxa3Ag100552.1	3b508cfaa8fe2ac9b46319e5ef483430	145	Phobius	SIGNAL_PEPTIDE_H_REGION	Hydrophobic region of a signal peptide.	4	15	-	2024-10-09	-	-
CAA41437_PR4_N.tabacum	e1e4a3009e0baf21fe846196fe82626f	147	Phobius	SIGNAL_PEPTIDE_H_REGION	Hydrophobic region of a signal peptide.	9	19	-	2024-10-09	-	-
CAA41437_PR4_N.tabacum	e1e4a3009e0baf21fe846196fe82626f	147	Phobius	NON_CYTOPLASMIC_DOMAIN	Region of a membrane-bound protein predicted to be outside the membrane, in the extracellular region.	28	147	-	2024-10-09	-	-
CAA41437_PR4_N.tabacum	e1e4a3009e0baf21fe846196fe82626f	147	Pfam	PF00967	Barwin family	27	145	2.6e-62	2024-10-09	IPR001153	Barwin domain
CAA41437_PR4_N.tabacum	e1e4a3009e0baf21fe846196fe82626f	147	Phobius	SIGNAL_PEPTIDE_C_REGION	C-terminal region of a signal peptide.	20	27	-	2024-10-09	-	-
CAA41437_PR4_N.tabacum	e1e4a3009e0baf21fe846196fe82626f	147	Phobius	SIGNAL_PEPTIDE_N_REGION	N-terminal region of a signal peptide.	1	8	-	2024-10-09	-	-
CAA41437_PR4_N.tabacum	e1e4a3009e0baf21fe846196fe82626f	147	Phobius	SIGNAL_PEPTIDE	Signal peptide region	1	27	-	2024-10-09	-	-

## Sheet: PR5
Protein	Run	Length	Prediction	Identifier	Description	Start	End	E-value	Date	InterPro ID	Description
Fxa2Bg203676.1	d70ce10ffad07b255fdb0d8807408de1	196	Pfam	PF00314	Thaumatin family	7	192	2.4e-67	2024-10-09	IPR001938	Thaumatin family
Fxa7Ag202374.1	2c10e6f508f0091215178f63985e9286	1304	Pfam	PF07714	Protein tyrosine and serine/threonine kinase	973	1188	4.5e-42	2024-10-09	IPR001245	Serine-threonine/tyrosine-protein kinase, catalytic domain
Fxa7Ag202374.1	2c10e6f508f0091215178f63985e9286	1304	Pfam	PF07714	Protein tyrosine and serine/threonine kinase	316	585	1.1e-41	2024-10-09	IPR001245	Serine-threonine/tyrosine-protein kinase, catalytic domain
Fxa7Ag202374.1	2c10e6f508f0091215178f63985e9286	1304	Phobius	SIGNAL_PEPTIDE_H_REGION	Hydrophobic region of a signal peptide.	6	17	-	2024-10-09	-	-
Fxa7Ag202374.1	2c10e6f508f0091215178f63985e9286	1304	Phobius	NON_CYTOPLASMIC_DOMAIN	Region of a membrane-bound protein predicted to be outside the membrane, in the extracellular region.	938	1304	-	2024-10-09	-	-
Fxa7Ag202374.1	2c10e6f508f0091215178f63985e9286	1304	Phobius	TRANSMEMBRANE	Region of a membrane-bound protein predicted to be embedded in the membrane.	914	937	-	2024-10-09	-	-
Fxa7Ag202374.1	2c10e6f508f0091215178f63985e9286	1304	Phobius	NON_CYTOPLASMIC_DOMAIN	Region of a membrane-bound protein predicted to be outside the membrane, in the extracellular region.	23	257	-	2024-10-09	-	-
Fxa7Ag202374.1	2c10e6f508f0091215178f63985e9286	1304	Phobius	CYTOPLASMIC_DOMAIN	Region of a membrane-bound protein predicted to be outside the membrane, in the cytoplasm.	283	913	-	2024-10-09	-	-
Fxa7Ag202374.1	2c10e6f508f0091215178f63985e9286	1304	Phobius	SIGNAL_PEPTIDE_C_REGION	C-terminal region of a signal peptide.	18	22	-	2024-10-09	-	-
Fxa7Ag202374.1	2c10e6f508f0091215178f63985e9286	1304	Pfam	PF00314	Thaumatin family	671	887	1.3e-45	2024-10-09	IPR001938	Thaumatin family
Fxa7Ag202374.1	2c10e6f508f0091215178f63985e9286	1304	Pfam	PF00314	Thaumatin family	29	243	7.6e-65	2024-10-09	IPR001938	Thaumatin family
Fxa7Ag202374.1	2c10e6f508f0091215178f63985e9286	1304	Phobius	SIGNAL_PEPTIDE_N_REGION	N-terminal region of a signal peptide.	1	5	-	2024-10-09	-	-
Fxa7Ag202374.1	2c10e6f508f0091215178f63985e9286	1304	Phobius	TRANSMEMBRANE	Region of a membrane-bound protein predicted to be embedded in the membrane.	258	282	-	2024-10-09	-	-
Fxa7Ag202374.1	2c10e6f508f0091215178f63985e9286	1304	Phobius	SIGNAL_PEPTIDE	Signal peptide region	1	22	-	2024-10-09	-	-
Fxa7Dg102085.1	842424ab36ea6f3dd4af5ccc69d4dd1f	680	Pfam	PF00314	Thaumatin family	31	248	4.9e-46	2024-10-09	IPR001938	Thaumatin family
Fxa7Dg102085.1	842424ab36ea6f3dd4af5ccc69d4dd1f	680	Phobius	SIGNAL_PEPTIDE_H_REGION	Hydrophobic region of a signal peptide.	7	19	-	2024-10-09	-	-
Fxa7Dg102085.1	842424ab36ea6f3dd4af5ccc69d4dd1f	680	Phobius	SIGNAL_PEPTIDE_N_REGION	N-terminal region of a signal peptide.	1	6	-	2024-10-09	-	-
Fxa7Dg102085.1	842424ab36ea6f3dd4af5ccc69d4dd1f	680	Pfam	PF07714	Protein tyrosine and serine/threonine kinase	346	611	3.8e-43	2024-10-09	IPR001245	Serine-threonine/tyrosine-protein kinase, catalytic domain
Fxa7Dg102085.1	842424ab36ea6f3dd4af5ccc69d4dd1f	680	Phobius	SIGNAL_PEPTIDE	Signal peptide region	1	24	-	2024-10-09	-	-
Fxa7Dg102085.1	842424ab36ea6f3dd4af5ccc69d4dd1f	680	Phobius	TRANSMEMBRANE	Region of a membrane-bound protein predicted to be embedded in the membrane.	287	310	-	2024-10-09	-	-
Fxa7Dg102085.1	842424ab36ea6f3dd4af5ccc69d4dd1f	680	Phobius	CYTOPLASMIC_DOMAIN	Region of a membrane-bound protein predicted to be outside the membrane, in the cytoplasm.	311	680	-	2024-10-09	-	-
Fxa7Dg102085.1	842424ab36ea6f3dd4af5ccc69d4dd1f	680	Phobius	SIGNAL_PEPTIDE_C_REGION	C-terminal region of a signal peptide.	20	24	-	2024-10-09	-	-
Fxa7Dg102085.1	842424ab36ea6f3dd4af5ccc69d4dd1f	680	Phobius	NON_CYTOPLASMIC_DOMAIN	Region of a membrane-bound protein predicted to be outside the membrane, in the extracellular region.	25	286	-	2024-10-09	-	-
Fxa7Dg102085.1	842424ab36ea6f3dd4af5ccc69d4dd1f	680	MobiDBLite	mobidb-lite	consensus disorder prediction	257	278	-	2024-10-09	-	-
Fxa2Cg201342.1	7e9738a5fc49b6b36ffda721b5779980	709	Phobius	NON_CYTOPLASMIC_DOMAIN	Region of a membrane-bound protein predicted to be outside the membrane, in the extracellular region.	22	709	-	2024-10-09	-	-
Fxa2Cg201342.1	7e9738a5fc49b6b36ffda721b5779980	709	Phobius	SIGNAL_PEPTIDE_C_REGION	C-terminal region of a signal peptide.	17	21	-	2024-10-09	-	-
Fxa2Cg201342.1	7e9738a5fc49b6b36ffda721b5779980	709	MobiDBLite	mobidb-lite	consensus disorder prediction	410	482	-	2024-10-09	-	-
Fxa2Cg201342.1	7e9738a5fc49b6b36ffda721b5779980	709	MobiDBLite	mobidb-lite	consensus disorder prediction	410	444	-	2024-10-09	-	-
Fxa2Cg201342.1	7e9738a5fc49b6b36ffda721b5779980	709	Phobius	SIGNAL_PEPTIDE_N_REGION	N-terminal region of a signal peptide.	1	4	-	2024-10-09	-	-
Fxa2Cg201342.1	7e9738a5fc49b6b36ffda721b5779980	709	Pfam	PF00314	Thaumatin family	33	248	5e-77	2024-10-09	IPR001938	Thaumatin family
Fxa2Cg201342.1	7e9738a5fc49b6b36ffda721b5779980	709	Pfam	PF06991	Microfibril-associated/Pre-mRNA processing	468	689	3.6e-73	2024-10-09	IPR009730	Micro-fibrillar-associated protein 1, C-terminal
Fxa2Cg201342.1	7e9738a5fc49b6b36ffda721b5779980	709	Phobius	SIGNAL_PEPTIDE	Signal peptide region	1	21	-	2024-10-09	-	-
Fxa2Cg201342.1	7e9738a5fc49b6b36ffda721b5779980	709	Phobius	SIGNAL_PEPTIDE_H_REGION	Hydrophobic region of a signal peptide.	5	16	-	2024-10-09	-	-
Fxa2Cg201342.1	7e9738a5fc49b6b36ffda721b5779980	709	MobiDBLite	mobidb-lite	consensus disorder prediction	445	468	-	2024-10-09	-	-
Fxa1Ag101076.1	e0becbc46104ad05d30dc29c82f92f35	649	Phobius	NON_CYTOPLASMIC_DOMAIN	Region of a membrane-bound protein predicted to be outside the membrane, in the extracellular region.	370	629	-	2024-10-09	-	-
Fxa1Ag101076.1	e0becbc46104ad05d30dc29c82f92f35	649	Phobius	CYTOPLASMIC_DOMAIN	Region of a membrane-bound protein predicted to be outside the membrane, in the cytoplasm.	648	649	-	2024-10-09	-	-
Fxa1Ag101076.1	e0becbc46104ad05d30dc29c82f92f35	649	Phobius	TRANSMEMBRANE	Region of a membrane-bound protein predicted to be embedded in the membrane.	348	369	-	2024-10-09	-	-
Fxa1Ag101076.1	e0becbc46104ad05d30dc29c82f92f35	649	Phobius	SIGNAL_PEPTIDE_N_REGION	N-terminal region of a signal peptide.	1	8	-	2024-10-09	-	-
Fxa1Ag101076.1	e0becbc46104ad05d30dc29c82f92f35	649	Phobius	NON_CYTOPLASMIC_DOMAIN	Region of a membrane-bound protein predicted to be outside the membrane, in the extracellular region.	25	273	-	2024-10-09	-	-
Fxa1Ag101076.1	e0becbc46104ad05d30dc29c82f92f35	649	Phobius	SIGNAL_PEPTIDE	Signal peptide region	1	24	-	2024-10-09	-	-
Fxa1Ag101076.1	e0becbc46104ad05d30dc29c82f92f35	649	Phobius	SIGNAL_PEPTIDE_H_REGION	Hydrophobic region of a signal peptide.	9	19	-	2024-10-09	-	-
Fxa1Ag101076.1	e0becbc46104ad05d30dc29c82f92f35	649	Phobius	SIGNAL_PEPTIDE_C_REGION	C-terminal region of a signal peptide.	20	24	-	2024-10-09	-	-
Fxa1Ag101076.1	e0becbc46104ad05d30dc29c82f92f35	649	Phobius	CYTOPLASMIC_DOMAIN	Region of a membrane-bound protein predicted to be outside the membrane, in the cytoplasm.	293	347	-	2024-10-09	-	-
Fxa1Ag101076.1	e0becbc46104ad05d30dc29c82f92f35	649	Phobius	TRANSMEMBRANE	Region of a membrane-bound protein predicted to be embedded in the membrane.	630	647	-	2024-10-09	-	-
Fxa1Ag101076.1	e0becbc46104ad05d30dc29c82f92f35	649	Pfam	PF00314	Thaumatin family	370	581	2.3e-80	2024-10-09	IPR001938	Thaumatin family
Fxa1Ag101076.1	e0becbc46104ad05d30dc29c82f92f35	649	Pfam	PF00314	Thaumatin family	31	247	1e-80	2024-10-09	IPR001938	Thaumatin family
Fxa1Ag101076.1	e0becbc46104ad05d30dc29c82f92f35	649	Phobius	TRANSMEMBRANE	Region of a membrane-bound protein predicted to be embedded in the membrane.	274	292	-	2024-10-09	-	-
Fxa5Cg201365.1	805f057a3a8ae78cf8b35ca4275d3950	247	Phobius	SIGNAL_PEPTIDE_C_REGION	C-terminal region of a signal peptide.	15	23	-	2024-10-09	-	-
Fxa5Cg201365.1	805f057a3a8ae78cf8b35ca4275d3950	247	Phobius	SIGNAL_PEPTIDE_H_REGION	Hydrophobic region of a signal peptide.	4	14	-	2024-10-09	-	-
Fxa5Cg201365.1	805f057a3a8ae78cf8b35ca4275d3950	247	Phobius	NON_CYTOPLASMIC_DOMAIN	Region of a membrane-bound protein predicted to be outside the membrane, in the extracellular region.	24	247	-	2024-10-09	-	-
Fxa5Cg201365.1	805f057a3a8ae78cf8b35ca4275d3950	247	Phobius	SIGNAL_PEPTIDE	Signal peptide region	1	23	-	2024-10-09	-	-
Fxa5Cg201365.1	805f057a3a8ae78cf8b35ca4275d3950	247	Phobius	SIGNAL_PEPTIDE_N_REGION	N-terminal region of a signal peptide.	1	3	-	2024-10-09	-	-
Fxa5Cg201365.1	805f057a3a8ae78cf8b35ca4275d3950	247	Pfam	PF00314	Thaumatin family	30	242	8.1e-80	2024-10-09	IPR001938	Thaumatin family
Fxa2Ag100152.1	2691a51c706f6055300cd2a59e6816b9	154	Phobius	SIGNAL_PEPTIDE	Signal peptide region	1	20	-	2024-10-09	-	-
Fxa2Ag100152.1	2691a51c706f6055300cd2a59e6816b9	154	Pfam	PF00314	Thaumatin family	27	137	8.4e-41	2024-10-09	IPR001938	Thaumatin family
Fxa2Ag100152.1	2691a51c706f6055300cd2a59e6816b9	154	Phobius	SIGNAL_PEPTIDE_H_REGION	Hydrophobic region of a signal peptide.	4	15	-	2024-10-09	-	-
Fxa2Ag100152.1	2691a51c706f6055300cd2a59e6816b9	154	Phobius	SIGNAL_PEPTIDE_N_REGION	N-terminal region of a signal peptide.	1	3	-	2024-10-09	-	-
Fxa2Ag100152.1	2691a51c706f6055300cd2a59e6816b9	154	Phobius	SIGNAL_PEPTIDE_C_REGION	C-terminal region of a signal peptide.	16	20	-	2024-10-09	-	-
Fxa2Ag100152.1	2691a51c706f6055300cd2a59e6816b9	154	Phobius	NON_CYTOPLASMIC_DOMAIN	Region of a membrane-bound protein predicted to be outside the membrane, in the extracellular region.	21	154	-	2024-10-09	-	-
Fxa6Ag100506.1	748192a891a6e26af552d47505733e21	250	Phobius	SIGNAL_PEPTIDE	Signal peptide region	1	25	-	2024-10-09	-	-
Fxa6Ag100506.1	748192a891a6e26af552d47505733e21	250	Phobius	SIGNAL_PEPTIDE_C_REGION	C-terminal region of a signal peptide.	21	25	-	2024-10-09	-	-
Fxa6Ag100506.1	748192a891a6e26af552d47505733e21	250	Phobius	SIGNAL_PEPTIDE_H_REGION	Hydrophobic region of a signal peptide.	6	20	-	2024-10-09	-	-
Fxa6Ag100506.1	748192a891a6e26af552d47505733e21	250	Phobius	NON_CYTOPLASMIC_DOMAIN	Region of a membrane-bound protein predicted to be outside the membrane, in the extracellular region.	26	250	-	2024-10-09	-	-
Fxa6Ag100506.1	748192a891a6e26af552d47505733e21	250	Pfam	PF00314	Thaumatin family	32	250	1.4e-68	2024-10-09	IPR001938	Thaumatin family
Fxa6Ag100506.1	748192a891a6e26af552d47505733e21	250	Phobius	SIGNAL_PEPTIDE_N_REGION	N-terminal region of a signal peptide.	1	5	-	2024-10-09	-	-
Fxa7Cg102220.1	adcf5ef6648d5a32f2c6975ba1f93ac4	1376	Pfam	PF00314	Thaumatin family	30	237	3.5e-56	2024-10-09	IPR001938	Thaumatin family
Fxa7Cg102220.1	adcf5ef6648d5a32f2c6975ba1f93ac4	1376	Pfam	PF00314	Thaumatin family	747	962	1.7e-68	2024-10-09	IPR001938	Thaumatin family
Fxa7Cg102220.1	adcf5ef6648d5a32f2c6975ba1f93ac4	1376	Phobius	NON_CYTOPLASMIC_DOMAIN	Region of a membrane-bound protein predicted to be outside the membrane, in the extracellular region.	22	220	-	2024-10-09	-	-
Fxa7Cg102220.1	adcf5ef6648d5a32f2c6975ba1f93ac4	1376	Phobius	NON_CYTOPLASMIC_DOMAIN	Region of a membrane-bound protein predicted to be outside the membrane, in the extracellular region.	277	986	-	2024-10-09	-	-
Fxa7Cg102220.1	adcf5ef6648d5a32f2c6975ba1f93ac4	1376	Phobius	CYTOPLASMIC_DOMAIN	Region of a membrane-bound protein predicted to be outside the membrane, in the cytoplasm.	241	251	-	2024-10-09	-	-
Fxa7Cg102220.1	adcf5ef6648d5a32f2c6975ba1f93ac4	1376	Pfam	PF07714	Protein tyrosine and serine/threonine kinase	310	579	1.8e-41	2024-10-09	IPR001245	Serine-threonine/tyrosine-protein kinase, catalytic domain
Fxa7Cg102220.1	adcf5ef6648d5a32f2c6975ba1f93ac4	1376	Pfam	PF07714	Protein tyrosine and serine/threonine kinase	1046	1248	7e-42	2024-10-09	IPR001245	Serine-threonine/tyrosine-protein kinase, catalytic domain
Fxa7Cg102220.1	adcf5ef6648d5a32f2c6975ba1f93ac4	1376	Phobius	SIGNAL_PEPTIDE	Signal peptide region	1	21	-	2024-10-09	-	-
Fxa7Cg102220.1	adcf5ef6648d5a32f2c6975ba1f93ac4	1376	Phobius	SIGNAL_PEPTIDE_N_REGION	N-terminal region of a signal peptide.	1	5	-	2024-10-09	-	-
Fxa7Cg102220.1	adcf5ef6648d5a32f2c6975ba1f93ac4	1376	Phobius	TRANSMEMBRANE	Region of a membrane-bound protein predicted to be embedded in the membrane.	987	1010	-	2024-10-09	-	-
Fxa7Cg102220.1	adcf5ef6648d5a32f2c6975ba1f93ac4	1376	Phobius	TRANSMEMBRANE	Region of a membrane-bound protein predicted to be embedded in the membrane.	221	240	-	2024-10-09	-	-
Fxa7Cg102220.1	adcf5ef6648d5a32f2c6975ba1f93ac4	1376	Phobius	SIGNAL_PEPTIDE_H_REGION	Hydrophobic region of a signal peptide.	6	17	-	2024-10-09	-	-
Fxa7Cg102220.1	adcf5ef6648d5a32f2c6975ba1f93ac4	1376	Phobius	CYTOPLASMIC_DOMAIN	Region of a membrane-bound protein predicted to be outside the membrane, in the cytoplasm.	1011	1376	-	2024-10-09	-	-
Fxa7Cg102220.1	adcf5ef6648d5a32f2c6975ba1f93ac4	1376	Phobius	TRANSMEMBRANE	Region of a membrane-bound protein predicted to be embedded in the membrane.	252	276	-	2024-10-09	-	-
Fxa7Cg102220.1	adcf5ef6648d5a32f2c6975ba1f93ac4	1376	Phobius	SIGNAL_PEPTIDE_C_REGION	C-terminal region of a signal peptide.	18	21	-	2024-10-09	-	-
Fxa2Bg200107.1	8de451798a897b2508755f13aaf49ad5	338	Phobius	SIGNAL_PEPTIDE	Signal peptide region	1	23	-	2024-10-09	-	-
Fxa2Bg200107.1	8de451798a897b2508755f13aaf49ad5	338	Phobius	NON_CYTOPLASMIC_DOMAIN	Region of a membrane-bound protein predicted to be outside the membrane, in the extracellular region.	24	338	-	2024-10-09	-	-
Fxa2Bg200107.1	8de451798a897b2508755f13aaf49ad5	338	Phobius	SIGNAL_PEPTIDE_C_REGION	C-terminal region of a signal peptide.	16	23	-	2024-10-09	-	-
Fxa2Bg200107.1	8de451798a897b2508755f13aaf49ad5	338	Phobius	SIGNAL_PEPTIDE_N_REGION	N-terminal region of a signal peptide.	1	3	-	2024-10-09	-	-
Fxa2Bg200107.1	8de451798a897b2508755f13aaf49ad5	338	Phobius	SIGNAL_PEPTIDE_H_REGION	Hydrophobic region of a signal peptide.	4	15	-	2024-10-09	-	-
Fxa2Bg200107.1	8de451798a897b2508755f13aaf49ad5	338	Pfam	PF00314	Thaumatin family	30	239	4.4e-80	2024-10-09	IPR001938	Thaumatin family
Fxa6Dg100995.1	0efb3defad523aa006e0a08d4b22279f	244	Phobius	NON_CYTOPLASMIC_DOMAIN	Region of a membrane-bound protein predicted to be outside the membrane, in the extracellular region.	23	244	-	2024-10-09	-	-
Fxa6Dg100995.1	0efb3defad523aa006e0a08d4b22279f	244	Phobius	SIGNAL_PEPTIDE_C_REGION	C-terminal region of a signal peptide.	18	22	-	2024-10-09	-	-
Fxa6Dg100995.1	0efb3defad523aa006e0a08d4b22279f	244	Phobius	SIGNAL_PEPTIDE_H_REGION	Hydrophobic region of a signal peptide.	6	17	-	2024-10-09	-	-
Fxa6Dg100995.1	0efb3defad523aa006e0a08d4b22279f	244	Pfam	PF00314	Thaumatin family	29	242	1.6e-78	2024-10-09	IPR001938	Thaumatin family
Fxa6Dg100995.1	0efb3defad523aa006e0a08d4b22279f	244	Phobius	SIGNAL_PEPTIDE_N_REGION	N-terminal region of a signal peptide.	1	5	-	2024-10-09	-	-
Fxa6Dg100995.1	0efb3defad523aa006e0a08d4b22279f	244	Phobius	SIGNAL_PEPTIDE	Signal peptide region	1	22	-	2024-10-09	-	-
Fxa6Ag101738.1	8854ae07612dcefb7fffdd34e5f3bdb8	245	Phobius	SIGNAL_PEPTIDE	Signal peptide region	1	23	-	2024-10-09	-	-
Fxa6Ag101738.1	8854ae07612dcefb7fffdd34e5f3bdb8	245	Phobius	SIGNAL_PEPTIDE_N_REGION	N-terminal region of a signal peptide.	1	6	-	2024-10-09	-	-
Fxa6Ag101738.1	8854ae07612dcefb7fffdd34e5f3bdb8	245	Phobius	SIGNAL_PEPTIDE_C_REGION	C-terminal region of a signal peptide.	19	23	-	2024-10-09	-	-
Fxa6Ag101738.1	8854ae07612dcefb7fffdd34e5f3bdb8	245	Phobius	NON_CYTOPLASMIC_DOMAIN	Region of a membrane-bound protein predicted to be outside the membrane, in the extracellular region.	24	245	-	2024-10-09	-	-
Fxa6Ag101738.1	8854ae07612dcefb7fffdd34e5f3bdb8	245	Phobius	SIGNAL_PEPTIDE_H_REGION	Hydrophobic region of a signal peptide.	7	18	-	2024-10-09	-	-
Fxa6Ag101738.1	8854ae07612dcefb7fffdd34e5f3bdb8	245	Pfam	PF00314	Thaumatin family	30	245	4.4e-75	2024-10-09	IPR001938	Thaumatin family
Fxa2Dg200120.1	71b9ece3967d16172f1ae4e17a51071a	276	Phobius	SIGNAL_PEPTIDE_N_REGION	N-terminal region of a signal peptide.	1	4	-	2024-10-09	-	-
Fxa2Dg200120.1	71b9ece3967d16172f1ae4e17a51071a	276	Pfam	PF00314	Thaumatin family	33	248	2.9e-78	2024-10-09	IPR001938	Thaumatin family
Fxa2Dg200120.1	71b9ece3967d16172f1ae4e17a51071a	276	Phobius	SIGNAL_PEPTIDE_C_REGION	C-terminal region of a signal peptide.	17	21	-	2024-10-09	-	-
Fxa2Dg200120.1	71b9ece3967d16172f1ae4e17a51071a	276	Phobius	SIGNAL_PEPTIDE	Signal peptide region	1	21	-	2024-10-09	-	-
Fxa2Dg200120.1	71b9ece3967d16172f1ae4e17a51071a	276	Phobius	SIGNAL_PEPTIDE_H_REGION	Hydrophobic region of a signal peptide.	5	16	-	2024-10-09	-	-
Fxa2Dg200120.1	71b9ece3967d16172f1ae4e17a51071a	276	Phobius	NON_CYTOPLASMIC_DOMAIN	Region of a membrane-bound protein predicted to be outside the membrane, in the extracellular region.	22	276	-	2024-10-09	-	-
Fxa4Cg200300.1	a703ba5a998a4c250abcb2635285b083	241	Phobius	SIGNAL_PEPTIDE_N_REGION	N-terminal region of a signal peptide.	1	4	-	2024-10-09	-	-
Fxa4Cg200300.1	a703ba5a998a4c250abcb2635285b083	241	Phobius	SIGNAL_PEPTIDE_H_REGION	Hydrophobic region of a signal peptide.	5	15	-	2024-10-09	-	-
Fxa4Cg200300.1	a703ba5a998a4c250abcb2635285b083	241	Pfam	PF00314	Thaumatin family	26	241	8.4e-78	2024-10-09	IPR001938	Thaumatin family
Fxa4Cg200300.1	a703ba5a998a4c250abcb2635285b083	241	Phobius	NON_CYTOPLASMIC_DOMAIN	Region of a membrane-bound protein predicted to be outside the membrane, in the extracellular region.	20	241	-	2024-10-09	-	-
Fxa4Cg200300.1	a703ba5a998a4c250abcb2635285b083	241	Phobius	SIGNAL_PEPTIDE	Signal peptide region	1	19	-	2024-10-09	-	-
Fxa4Cg200300.1	a703ba5a998a4c250abcb2635285b083	241	Phobius	SIGNAL_PEPTIDE_C_REGION	C-terminal region of a signal peptide.	16	19	-	2024-10-09	-	-
Fxa5Bg100176.1	e1b48538f9987093ae7704947c761679	733	Phobius	TRANSMEMBRANE	Region of a membrane-bound protein predicted to be embedded in the membrane.	496	515	-	2024-10-09	-	-
Fxa5Bg100176.1	e1b48538f9987093ae7704947c761679	733	Phobius	SIGNAL_PEPTIDE_H_REGION	Hydrophobic region of a signal peptide.	4	14	-	2024-10-09	-	-
Fxa5Bg100176.1	e1b48538f9987093ae7704947c761679	733	Pfam	PF00314	Thaumatin family	521	715	7.8e-57	2024-10-09	IPR001938	Thaumatin family
Fxa5Bg100176.1	e1b48538f9987093ae7704947c761679	733	Pfam	PF00314	Thaumatin family	288	480	5.3e-54	2024-10-09	IPR001938	Thaumatin family
Fxa5Bg100176.1	e1b48538f9987093ae7704947c761679	733	Pfam	PF00314	Thaumatin family	78	267	4.8e-46	2024-10-09	IPR001938	Thaumatin family
Fxa5Bg100176.1	e1b48538f9987093ae7704947c761679	733	Phobius	CYTOPLASMIC_DOMAIN	Region of a membrane-bound protein predicted to be outside the membrane, in the cytoplasm.	70	495	-	2024-10-09	-	-
Fxa5Bg100176.1	e1b48538f9987093ae7704947c761679	733	Phobius	SIGNAL_PEPTIDE_N_REGION	N-terminal region of a signal peptide.	1	3	-	2024-10-09	-	-
Fxa5Bg100176.1	e1b48538f9987093ae7704947c761679	733	Phobius	SIGNAL_PEPTIDE_C_REGION	C-terminal region of a signal peptide.	15	19	-	2024-10-09	-	-
Fxa5Bg100176.1	e1b48538f9987093ae7704947c761679	733	Phobius	NON_CYTOPLASMIC_DOMAIN	Region of a membrane-bound protein predicted to be outside the membrane, in the extracellular region.	516	733	-	2024-10-09	-	-
Fxa5Bg100176.1	e1b48538f9987093ae7704947c761679	733	Phobius	SIGNAL_PEPTIDE	Signal peptide region	1	19	-	2024-10-09	-	-
Fxa5Bg100176.1	e1b48538f9987093ae7704947c761679	733	Phobius	TRANSMEMBRANE	Region of a membrane-bound protein predicted to be embedded in the membrane.	51	69	-	2024-10-09	-	-
Fxa5Bg100176.1	e1b48538f9987093ae7704947c761679	733	Phobius	NON_CYTOPLASMIC_DOMAIN	Region of a membrane-bound protein predicted to be outside the membrane, in the extracellular region.	20	50	-	2024-10-09	-	-
Fxa2AgPR5_1	8fa617f7cfbe7279ca56236a6eb5616e	73	Pfam	PF00314	Thaumatin family	2	72	1e-11	2024-10-09	IPR001938	Thaumatin family
Fxa7Bg202168.1	46216e6c367bbab7d8e30b296706dc22	290	Phobius	CYTOPLASMIC_DOMAIN	Region of a membrane-bound protein predicted to be outside the membrane, in the cytoplasm.	64	290	-	2024-10-09	-	-
Fxa7Bg202168.1	46216e6c367bbab7d8e30b296706dc22	290	Phobius	CYTOPLASMIC_DOMAIN	Region of a membrane-bound protein predicted to be outside the membrane, in the cytoplasm.	1	6	-	2024-10-09	-	-
Fxa7Bg202168.1	46216e6c367bbab7d8e30b296706dc22	290	Phobius	TRANSMEMBRANE	Region of a membrane-bound protein predicted to be embedded in the membrane.	46	63	-	2024-10-09	-	-
Fxa7Bg202168.1	46216e6c367bbab7d8e30b296706dc22	290	Phobius	NON_CYTOPLASMIC_DOMAIN	Region of a membrane-bound protein predicted to be outside the membrane, in the extracellular region.	27	45	-	2024-10-09	-	-
Fxa7Bg202168.1	46216e6c367bbab7d8e30b296706dc22	290	Pfam	PF00314	Thaumatin family	72	286	8.6e-74	2024-10-09	IPR001938	Thaumatin family
Fxa7Bg202168.1	46216e6c367bbab7d8e30b296706dc22	290	Phobius	TRANSMEMBRANE	Region of a membrane-bound protein predicted to be embedded in the membrane.	7	26	-	2024-10-09	-	-
Fxa2Bg203489.1	e276a95efcad57f2e8fe46525369e0c8	548	Phobius	SIGNAL_PEPTIDE	Signal peptide region	1	23	-	2024-10-09	-	-
Fxa2Bg203489.1	e276a95efcad57f2e8fe46525369e0c8	548	Pfam	PF00314	Thaumatin family	30	247	5.3e-82	2024-10-09	IPR001938	Thaumatin family
Fxa2Bg203489.1	e276a95efcad57f2e8fe46525369e0c8	548	Pfam	PF00314	Thaumatin family	311	452	6.5e-51	2024-10-09	IPR001938	Thaumatin family
Fxa2Bg203489.1	e276a95efcad57f2e8fe46525369e0c8	548	Phobius	SIGNAL_PEPTIDE_H_REGION	Hydrophobic region of a signal peptide.	4	15	-	2024-10-09	-	-
Fxa2Bg203489.1	e276a95efcad57f2e8fe46525369e0c8	548	Phobius	SIGNAL_PEPTIDE_N_REGION	N-terminal region of a signal peptide.	1	3	-	2024-10-09	-	-
Fxa2Bg203489.1	e276a95efcad57f2e8fe46525369e0c8	548	MobiDBLite	mobidb-lite	consensus disorder prediction	459	477	-	2024-10-09	-	-
Fxa2Bg203489.1	e276a95efcad57f2e8fe46525369e0c8	548	MobiDBLite	mobidb-lite	consensus disorder prediction	254	276	-	2024-10-09	-	-
Fxa2Bg203489.1	e276a95efcad57f2e8fe46525369e0c8	548	MobiDBLite	mobidb-lite	consensus disorder prediction	254	295	-	2024-10-09	-	-
Fxa2Bg203489.1	e276a95efcad57f2e8fe46525369e0c8	548	MobiDBLite	mobidb-lite	consensus disorder prediction	459	510	-	2024-10-09	-	-
Fxa2Bg203489.1	e276a95efcad57f2e8fe46525369e0c8	548	MobiDBLite	mobidb-lite	consensus disorder prediction	478	494	-	2024-10-09	-	-
Fxa2Bg203489.1	e276a95efcad57f2e8fe46525369e0c8	548	Phobius	SIGNAL_PEPTIDE_C_REGION	C-terminal region of a signal peptide.	16	23	-	2024-10-09	-	-
Fxa2Bg203489.1	e276a95efcad57f2e8fe46525369e0c8	548	Phobius	CYTOPLASMIC_DOMAIN	Region of a membrane-bound protein predicted to be outside the membrane, in the cytoplasm.	548	548	-	2024-10-09	-	-
Fxa2Bg203489.1	e276a95efcad57f2e8fe46525369e0c8	548	Phobius	TRANSMEMBRANE	Region of a membrane-bound protein predicted to be embedded in the membrane.	529	547	-	2024-10-09	-	-
Fxa2Bg203489.1	e276a95efcad57f2e8fe46525369e0c8	548	Phobius	NON_CYTOPLASMIC_DOMAIN	Region of a membrane-bound protein predicted to be outside the membrane, in the extracellular region.	24	528	-	2024-10-09	-	-
Fxa2Dg202476.1	f01fe27c8165a0bb14cc74ac778be482	388	Pfam	PF00314	Thaumatin family	37	242	4.8e-73	2024-10-09	IPR001938	Thaumatin family
Fxa2Dg202476.1	f01fe27c8165a0bb14cc74ac778be482	388	Phobius	SIGNAL_PEPTIDE_N_REGION	N-terminal region of a signal peptide.	1	6	-	2024-10-09	-	-
Fxa2Dg202476.1	f01fe27c8165a0bb14cc74ac778be482	388	Phobius	SIGNAL_PEPTIDE	Signal peptide region	1	29	-	2024-10-09	-	-
Fxa2Dg202476.1	f01fe27c8165a0bb14cc74ac778be482	388	Phobius	NON_CYTOPLASMIC_DOMAIN	Region of a membrane-bound protein predicted to be outside the membrane, in the extracellular region.	30	388	-	2024-10-09	-	-
Fxa2Dg202476.1	f01fe27c8165a0bb14cc74ac778be482	388	Phobius	SIGNAL_PEPTIDE_C_REGION	C-terminal region of a signal peptide.	21	29	-	2024-10-09	-	-
Fxa2Dg202476.1	f01fe27c8165a0bb14cc74ac778be482	388	Phobius	SIGNAL_PEPTIDE_H_REGION	Hydrophobic region of a signal peptide.	7	20	-	2024-10-09	-	-
Fxa2Dg202476.1	f01fe27c8165a0bb14cc74ac778be482	388	Pfam	PF03671	Ubiquitin fold modifier 1 protein	296	370	8.6e-38	2024-10-09	IPR005375	Ubiquitin-fold modifier 1
Fxa2Cg200121.1	4142737425d3369f4035045e7fb922a2	228	Phobius	SIGNAL_PEPTIDE_H_REGION	Hydrophobic region of a signal peptide.	10	22	-	2024-10-09	-	-
Fxa2Cg200121.1	4142737425d3369f4035045e7fb922a2	228	Phobius	SIGNAL_PEPTIDE_N_REGION	N-terminal region of a signal peptide.	1	9	-	2024-10-09	-	-
Fxa2Cg200121.1	4142737425d3369f4035045e7fb922a2	228	Phobius	SIGNAL_PEPTIDE_C_REGION	C-terminal region of a signal peptide.	23	30	-	2024-10-09	-	-
Fxa2Cg200121.1	4142737425d3369f4035045e7fb922a2	228	Phobius	NON_CYTOPLASMIC_DOMAIN	Region of a membrane-bound protein predicted to be outside the membrane, in the extracellular region.	31	228	-	2024-10-09	-	-
Fxa2Cg200121.1	4142737425d3369f4035045e7fb922a2	228	Pfam	PF00314	Thaumatin family	37	203	1.9e-55	2024-10-09	IPR001938	Thaumatin family
Fxa2Cg200121.1	4142737425d3369f4035045e7fb922a2	228	Phobius	SIGNAL_PEPTIDE	Signal peptide region	1	30	-	2024-10-09	-	-
Fxa4Ag100336.1	bdc70903f0d26b218fc0b52b31649fd8	244	Phobius	SIGNAL_PEPTIDE_N_REGION	N-terminal region of a signal peptide.	1	4	-	2024-10-09	-	-
Fxa4Ag100336.1	bdc70903f0d26b218fc0b52b31649fd8	244	Pfam	PF00314	Thaumatin family	29	244	1.3e-78	2024-10-09	IPR001938	Thaumatin family
Fxa4Ag100336.1	bdc70903f0d26b218fc0b52b31649fd8	244	Phobius	SIGNAL_PEPTIDE_H_REGION	Hydrophobic region of a signal peptide.	5	17	-	2024-10-09	-	-
Fxa4Ag100336.1	bdc70903f0d26b218fc0b52b31649fd8	244	Phobius	NON_CYTOPLASMIC_DOMAIN	Region of a membrane-bound protein predicted to be outside the membrane, in the extracellular region.	23	244	-	2024-10-09	-	-
Fxa4Ag100336.1	bdc70903f0d26b218fc0b52b31649fd8	244	Phobius	SIGNAL_PEPTIDE_C_REGION	C-terminal region of a signal peptide.	18	22	-	2024-10-09	-	-
Fxa4Ag100336.1	bdc70903f0d26b218fc0b52b31649fd8	244	Phobius	SIGNAL_PEPTIDE	Signal peptide region	1	22	-	2024-10-09	-	-
Fxa1Cg101019.1	690f2547542da48c384b49f6267a63dd	659	Pfam	PF00314	Thaumatin family	340	551	3.5e-80	2024-10-09	IPR001938	Thaumatin family
Fxa1Cg101019.1	690f2547542da48c384b49f6267a63dd	659	Pfam	PF00314	Thaumatin family	31	247	6.6e-79	2024-10-09	IPR001938	Thaumatin family
Fxa1Cg101019.1	690f2547542da48c384b49f6267a63dd	659	Phobius	SIGNAL_PEPTIDE_N_REGION	N-terminal region of a signal peptide.	1	8	-	2024-10-09	-	-
Fxa1Cg101019.1	690f2547542da48c384b49f6267a63dd	659	MobiDBLite	mobidb-lite	consensus disorder prediction	638	659	-	2024-10-09	-	-
Fxa1Cg101019.1	690f2547542da48c384b49f6267a63dd	659	Phobius	TRANSMEMBRANE	Region of a membrane-bound protein predicted to be embedded in the membrane.	600	621	-	2024-10-09	-	-
Fxa1Cg101019.1	690f2547542da48c384b49f6267a63dd	659	Phobius	TRANSMEMBRANE	Region of a membrane-bound protein predicted to be embedded in the membrane.	277	295	-	2024-10-09	-	-
Fxa1Cg101019.1	690f2547542da48c384b49f6267a63dd	659	Phobius	SIGNAL_PEPTIDE_H_REGION	Hydrophobic region of a signal peptide.	9	19	-	2024-10-09	-	-
Fxa1Cg101019.1	690f2547542da48c384b49f6267a63dd	659	Phobius	TRANSMEMBRANE	Region of a membrane-bound protein predicted to be embedded in the membrane.	316	339	-	2024-10-09	-	-
Fxa1Cg101019.1	690f2547542da48c384b49f6267a63dd	659	Phobius	CYTOPLASMIC_DOMAIN	Region of a membrane-bound protein predicted to be outside the membrane, in the cytoplasm.	622	659	-	2024-10-09	-	-
Fxa1Cg101019.1	690f2547542da48c384b49f6267a63dd	659	Phobius	NON_CYTOPLASMIC_DOMAIN	Region of a membrane-bound protein predicted to be outside the membrane, in the extracellular region.	340	599	-	2024-10-09	-	-
Fxa1Cg101019.1	690f2547542da48c384b49f6267a63dd	659	Phobius	SIGNAL_PEPTIDE	Signal peptide region	1	24	-	2024-10-09	-	-
Fxa1Cg101019.1	690f2547542da48c384b49f6267a63dd	659	Phobius	CYTOPLASMIC_DOMAIN	Region of a membrane-bound protein predicted to be outside the membrane, in the cytoplasm.	296	315	-	2024-10-09	-	-
Fxa1Cg101019.1	690f2547542da48c384b49f6267a63dd	659	Phobius	SIGNAL_PEPTIDE_C_REGION	C-terminal region of a signal peptide.	20	24	-	2024-10-09	-	-
Fxa1Cg101019.1	690f2547542da48c384b49f6267a63dd	659	MobiDBLite	mobidb-lite	consensus disorder prediction	645	659	-	2024-10-09	-	-
Fxa1Cg101019.1	690f2547542da48c384b49f6267a63dd	659	Phobius	NON_CYTOPLASMIC_DOMAIN	Region of a membrane-bound protein predicted to be outside the membrane, in the extracellular region.	25	276	-	2024-10-09	-	-
Fxa5Ag200169.1	9f8b8551ae104ce4fc3f29d7276e43b0	976	Phobius	SIGNAL_PEPTIDE_H_REGION	Hydrophobic region of a signal peptide.	6	16	-	2024-10-09	-	-
Fxa5Ag200169.1	9f8b8551ae104ce4fc3f29d7276e43b0	976	Pfam	PF00314	Thaumatin family	764	958	4.2e-57	2024-10-09	IPR001938	Thaumatin family
Fxa5Ag200169.1	9f8b8551ae104ce4fc3f29d7276e43b0	976	Pfam	PF00314	Thaumatin family	540	725	9.2e-53	2024-10-09	IPR001938	Thaumatin family
Fxa5Ag200169.1	9f8b8551ae104ce4fc3f29d7276e43b0	976	Pfam	PF00314	Thaumatin family	320	512	2.6e-52	2024-10-09	IPR001938	Thaumatin family
Fxa5Ag200169.1	9f8b8551ae104ce4fc3f29d7276e43b0	976	Pfam	PF00314	Thaumatin family	72	257	5.3e-52	2024-10-09	IPR001938	Thaumatin family
Fxa5Ag200169.1	9f8b8551ae104ce4fc3f29d7276e43b0	976	Phobius	SIGNAL_PEPTIDE_C_REGION	C-terminal region of a signal peptide.	17	21	-	2024-10-09	-	-
Fxa5Ag200169.1	9f8b8551ae104ce4fc3f29d7276e43b0	976	Phobius	TRANSMEMBRANE	Region of a membrane-bound protein predicted to be embedded in the membrane.	293	311	-	2024-10-09	-	-
Fxa5Ag200169.1	9f8b8551ae104ce4fc3f29d7276e43b0	976	Phobius	NON_CYTOPLASMIC_DOMAIN	Region of a membrane-bound protein predicted to be outside the membrane, in the extracellular region.	759	976	-	2024-10-09	-	-
Fxa5Ag200169.1	9f8b8551ae104ce4fc3f29d7276e43b0	976	Phobius	SIGNAL_PEPTIDE	Signal peptide region	1	21	-	2024-10-09	-	-
Fxa5Ag200169.1	9f8b8551ae104ce4fc3f29d7276e43b0	976	Phobius	CYTOPLASMIC_DOMAIN	Region of a membrane-bound protein predicted to be outside the membrane, in the cytoplasm.	312	738	-	2024-10-09	-	-
Fxa5Ag200169.1	9f8b8551ae104ce4fc3f29d7276e43b0	976	Phobius	TRANSMEMBRANE	Region of a membrane-bound protein predicted to be embedded in the membrane.	739	758	-	2024-10-09	-	-
Fxa5Ag200169.1	9f8b8551ae104ce4fc3f29d7276e43b0	976	Phobius	SIGNAL_PEPTIDE_N_REGION	N-terminal region of a signal peptide.	1	5	-	2024-10-09	-	-
Fxa5Ag200169.1	9f8b8551ae104ce4fc3f29d7276e43b0	976	Phobius	NON_CYTOPLASMIC_DOMAIN	Region of a membrane-bound protein predicted to be outside the membrane, in the extracellular region.	22	292	-	2024-10-09	-	-
Fxa6Dg101386.1	263faa308bc4fbd67af3ef9550eb693a	245	Phobius	SIGNAL_PEPTIDE	Signal peptide region	1	23	-	2024-10-09	-	-
Fxa6Dg101386.1	263faa308bc4fbd67af3ef9550eb693a	245	Phobius	SIGNAL_PEPTIDE_N_REGION	N-terminal region of a signal peptide.	1	6	-	2024-10-09	-	-
Fxa6Dg101386.1	263faa308bc4fbd67af3ef9550eb693a	245	Phobius	SIGNAL_PEPTIDE_C_REGION	C-terminal region of a signal peptide.	19	23	-	2024-10-09	-	-
Fxa6Dg101386.1	263faa308bc4fbd67af3ef9550eb693a	245	Phobius	NON_CYTOPLASMIC_DOMAIN	Region of a membrane-bound protein predicted to be outside the membrane, in the extracellular region.	24	245	-	2024-10-09	-	-
Fxa6Dg101386.1	263faa308bc4fbd67af3ef9550eb693a	245	Phobius	SIGNAL_PEPTIDE_H_REGION	Hydrophobic region of a signal peptide.	7	18	-	2024-10-09	-	-
Fxa6Dg101386.1	263faa308bc4fbd67af3ef9550eb693a	245	Pfam	PF00314	Thaumatin family	30	245	1.1e-73	2024-10-09	IPR001938	Thaumatin family
Fxa7Ag203258.1	995fe2f20bf4a0368abf9f0e3aca2953	332	Phobius	CYTOPLASMIC_DOMAIN	Region of a membrane-bound protein predicted to be outside the membrane, in the cytoplasm.	33	43	-	2024-10-09	-	-
Fxa7Ag203258.1	995fe2f20bf4a0368abf9f0e3aca2953	332	Phobius	CYTOPLASMIC_DOMAIN	Region of a membrane-bound protein predicted to be outside the membrane, in the cytoplasm.	332	332	-	2024-10-09	-	-
Fxa7Ag203258.1	995fe2f20bf4a0368abf9f0e3aca2953	332	Pfam	PF00314	Thaumatin family	66	281	5.7e-79	2024-10-09	IPR001938	Thaumatin family
Fxa7Ag203258.1	995fe2f20bf4a0368abf9f0e3aca2953	332	Phobius	TRANSMEMBRANE	Region of a membrane-bound protein predicted to be embedded in the membrane.	15	32	-	2024-10-09	-	-
Fxa7Ag203258.1	995fe2f20bf4a0368abf9f0e3aca2953	332	Phobius	NON_CYTOPLASMIC_DOMAIN	Region of a membrane-bound protein predicted to be outside the membrane, in the extracellular region.	65	314	-	2024-10-09	-	-
Fxa7Ag203258.1	995fe2f20bf4a0368abf9f0e3aca2953	332	Phobius	NON_CYTOPLASMIC_DOMAIN	Region of a membrane-bound protein predicted to be outside the membrane, in the extracellular region.	1	14	-	2024-10-09	-	-
Fxa7Ag203258.1	995fe2f20bf4a0368abf9f0e3aca2953	332	Phobius	TRANSMEMBRANE	Region of a membrane-bound protein predicted to be embedded in the membrane.	315	331	-	2024-10-09	-	-
Fxa7Ag203258.1	995fe2f20bf4a0368abf9f0e3aca2953	332	Phobius	TRANSMEMBRANE	Region of a membrane-bound protein predicted to be embedded in the membrane.	44	64	-	2024-10-09	-	-
Fxa3Bg203030.1	41263627146251e579b1cbfd0fda7db5	248	Phobius	SIGNAL_PEPTIDE	Signal peptide region	1	23	-	2024-10-09	-	-
Fxa3Bg203030.1	41263627146251e579b1cbfd0fda7db5	248	Phobius	SIGNAL_PEPTIDE_N_REGION	N-terminal region of a signal peptide.	1	6	-	2024-10-09	-	-
Fxa3Bg203030.1	41263627146251e579b1cbfd0fda7db5	248	Phobius	SIGNAL_PEPTIDE_C_REGION	C-terminal region of a signal peptide.	19	23	-	2024-10-09	-	-
Fxa3Bg203030.1	41263627146251e579b1cbfd0fda7db5	248	Phobius	NON_CYTOPLASMIC_DOMAIN	Region of a membrane-bound protein predicted to be outside the membrane, in the extracellular region.	24	248	-	2024-10-09	-	-
Fxa3Bg203030.1	41263627146251e579b1cbfd0fda7db5	248	Phobius	SIGNAL_PEPTIDE_H_REGION	Hydrophobic region of a signal peptide.	7	18	-	2024-10-09	-	-
Fxa3Bg203030.1	41263627146251e579b1cbfd0fda7db5	248	Pfam	PF00314	Thaumatin family	34	248	2.2e-71	2024-10-09	IPR001938	Thaumatin family
Fxa5Ag200562.1	f74277aea540ce08cdae1b0c73a3da45	569	Phobius	SIGNAL_PEPTIDE_N_REGION	N-terminal region of a signal peptide.	1	4	-	2024-10-09	-	-
Fxa5Ag200562.1	f74277aea540ce08cdae1b0c73a3da45	569	Phobius	NON_CYTOPLASMIC_DOMAIN	Region of a membrane-bound protein predicted to be outside the membrane, in the extracellular region.	23	569	-	2024-10-09	-	-
Fxa5Ag200562.1	f74277aea540ce08cdae1b0c73a3da45	569	Phobius	SIGNAL_PEPTIDE_H_REGION	Hydrophobic region of a signal peptide.	5	17	-	2024-10-09	-	-
Fxa5Ag200562.1	f74277aea540ce08cdae1b0c73a3da45	569	Phobius	SIGNAL_PEPTIDE_C_REGION	C-terminal region of a signal peptide.	18	22	-	2024-10-09	-	-
Fxa5Ag200562.1	f74277aea540ce08cdae1b0c73a3da45	569	Pfam	PF00314	Thaumatin family	341	511	1.7e-41	2024-10-09	IPR001938	Thaumatin family
Fxa5Ag200562.1	f74277aea540ce08cdae1b0c73a3da45	569	Pfam	PF00314	Thaumatin family	29	232	3.4e-61	2024-10-09	IPR001938	Thaumatin family
Fxa5Ag200562.1	f74277aea540ce08cdae1b0c73a3da45	569	Phobius	SIGNAL_PEPTIDE	Signal peptide region	1	22	-	2024-10-09	-	-
Fxa2Ag103924.1	1fd229a6677b0a87126a2869d93502ed	255	Phobius	SIGNAL_PEPTIDE_N_REGION	N-terminal region of a signal peptide.	1	9	-	2024-10-09	-	-
Fxa2Ag103924.1	1fd229a6677b0a87126a2869d93502ed	255	Phobius	SIGNAL_PEPTIDE_H_REGION	Hydrophobic region of a signal peptide.	10	22	-	2024-10-09	-	-
Fxa2Ag103924.1	1fd229a6677b0a87126a2869d93502ed	255	Pfam	PF00314	Thaumatin family	37	251	3.5e-78	2024-10-09	IPR001938	Thaumatin family
Fxa2Ag103924.1	1fd229a6677b0a87126a2869d93502ed	255	Phobius	SIGNAL_PEPTIDE_C_REGION	C-terminal region of a signal peptide.	23	30	-	2024-10-09	-	-
Fxa2Ag103924.1	1fd229a6677b0a87126a2869d93502ed	255	Phobius	NON_CYTOPLASMIC_DOMAIN	Region of a membrane-bound protein predicted to be outside the membrane, in the extracellular region.	31	255	-	2024-10-09	-	-
Fxa2Ag103924.1	1fd229a6677b0a87126a2869d93502ed	255	Phobius	SIGNAL_PEPTIDE	Signal peptide region	1	30	-	2024-10-09	-	-
Fxa5Dg201423.1	cbc13feafc4165bfb2fbc52b639e9ec3	253	Phobius	NON_CYTOPLASMIC_DOMAIN	Region of a membrane-bound protein predicted to be outside the membrane, in the extracellular region.	30	253	-	2024-10-09	-	-
Fxa5Dg201423.1	cbc13feafc4165bfb2fbc52b639e9ec3	253	Phobius	SIGNAL_PEPTIDE	Signal peptide region	1	29	-	2024-10-09	-	-
Fxa5Dg201423.1	cbc13feafc4165bfb2fbc52b639e9ec3	253	Phobius	SIGNAL_PEPTIDE_N_REGION	N-terminal region of a signal peptide.	1	8	-	2024-10-09	-	-
Fxa5Dg201423.1	cbc13feafc4165bfb2fbc52b639e9ec3	253	Phobius	SIGNAL_PEPTIDE_H_REGION	Hydrophobic region of a signal peptide.	9	20	-	2024-10-09	-	-
Fxa5Dg201423.1	cbc13feafc4165bfb2fbc52b639e9ec3	253	Pfam	PF00314	Thaumatin family	36	248	5.8e-80	2024-10-09	IPR001938	Thaumatin family
Fxa5Dg201423.1	cbc13feafc4165bfb2fbc52b639e9ec3	253	Phobius	SIGNAL_PEPTIDE_C_REGION	C-terminal region of a signal peptide.	21	29	-	2024-10-09	-	-
Fxa7Bg202287.1	94b519677957069b4215b28b3cfb51bc	89	MobiDBLite	mobidb-lite	consensus disorder prediction	14	43	-	2024-10-09	-	-
Fxa5Cg200151.1	dea8a88cc22b906e350796875ed7c379	248	Phobius	SIGNAL_PEPTIDE_C_REGION	C-terminal region of a signal peptide.	26	29	-	2024-10-09	-	-
Fxa5Cg200151.1	dea8a88cc22b906e350796875ed7c379	248	Phobius	NON_CYTOPLASMIC_DOMAIN	Region of a membrane-bound protein predicted to be outside the membrane, in the extracellular region.	30	248	-	2024-10-09	-	-
Fxa5Cg200151.1	dea8a88cc22b906e350796875ed7c379	248	Phobius	SIGNAL_PEPTIDE_H_REGION	Hydrophobic region of a signal peptide.	11	25	-	2024-10-09	-	-
Fxa5Cg200151.1	dea8a88cc22b906e350796875ed7c379	248	Phobius	SIGNAL_PEPTIDE	Signal peptide region	1	29	-	2024-10-09	-	-
Fxa5Cg200151.1	dea8a88cc22b906e350796875ed7c379	248	Phobius	SIGNAL_PEPTIDE_N_REGION	N-terminal region of a signal peptide.	1	10	-	2024-10-09	-	-
Fxa5Cg200151.1	dea8a88cc22b906e350796875ed7c379	248	Pfam	PF00314	Thaumatin family	36	230	2.4e-57	2024-10-09	IPR001938	Thaumatin family
Fxa3Ag103349.1	f76ccff37876c91ac325c4265acbae3f	248	Pfam	PF00314	Thaumatin family	34	248	3.6e-71	2024-10-09	IPR001938	Thaumatin family
Fxa3Ag103349.1	f76ccff37876c91ac325c4265acbae3f	248	Phobius	SIGNAL_PEPTIDE	Signal peptide region	1	23	-	2024-10-09	-	-
Fxa3Ag103349.1	f76ccff37876c91ac325c4265acbae3f	248	Phobius	SIGNAL_PEPTIDE_N_REGION	N-terminal region of a signal peptide.	1	6	-	2024-10-09	-	-
Fxa3Ag103349.1	f76ccff37876c91ac325c4265acbae3f	248	Phobius	SIGNAL_PEPTIDE_C_REGION	C-terminal region of a signal peptide.	19	23	-	2024-10-09	-	-
Fxa3Ag103349.1	f76ccff37876c91ac325c4265acbae3f	248	Phobius	NON_CYTOPLASMIC_DOMAIN	Region of a membrane-bound protein predicted to be outside the membrane, in the extracellular region.	24	248	-	2024-10-09	-	-
Fxa3Ag103349.1	f76ccff37876c91ac325c4265acbae3f	248	Phobius	SIGNAL_PEPTIDE_H_REGION	Hydrophobic region of a signal peptide.	7	18	-	2024-10-09	-	-
Fxa6Ag101251.1	c7c48be385e3ab58c7855a0a1e01e1f9	244	Pfam	PF00314	Thaumatin family	29	242	1.9e-78	2024-10-09	IPR001938	Thaumatin family
Fxa6Ag101251.1	c7c48be385e3ab58c7855a0a1e01e1f9	244	Phobius	NON_CYTOPLASMIC_DOMAIN	Region of a membrane-bound protein predicted to be outside the membrane, in the extracellular region.	23	244	-	2024-10-09	-	-
Fxa6Ag101251.1	c7c48be385e3ab58c7855a0a1e01e1f9	244	Phobius	SIGNAL_PEPTIDE_C_REGION	C-terminal region of a signal peptide.	18	22	-	2024-10-09	-	-
Fxa6Ag101251.1	c7c48be385e3ab58c7855a0a1e01e1f9	244	Phobius	SIGNAL_PEPTIDE_H_REGION	Hydrophobic region of a signal peptide.	6	17	-	2024-10-09	-	-
Fxa6Ag101251.1	c7c48be385e3ab58c7855a0a1e01e1f9	244	Phobius	SIGNAL_PEPTIDE_N_REGION	N-terminal region of a signal peptide.	1	5	-	2024-10-09	-	-
Fxa6Ag101251.1	c7c48be385e3ab58c7855a0a1e01e1f9	244	Phobius	SIGNAL_PEPTIDE	Signal peptide region	1	22	-	2024-10-09	-	-
Fxa7Dg102086.1	051462ddfebaacf74cddd68304c92b51	1184	Pfam	PF07714	Protein tyrosine and serine/threonine kinase	937	1136	1.6e-40	2024-10-09	IPR001245	Serine-threonine/tyrosine-protein kinase, catalytic domain
Fxa7Dg102086.1	051462ddfebaacf74cddd68304c92b51	1184	Pfam	PF07714	Protein tyrosine and serine/threonine kinase	301	570	1.5e-41	2024-10-09	IPR001245	Serine-threonine/tyrosine-protein kinase, catalytic domain
Fxa7Dg102086.1	051462ddfebaacf74cddd68304c92b51	1184	Phobius	CYTOPLASMIC_DOMAIN	Region of a membrane-bound protein predicted to be outside the membrane, in the cytoplasm.	902	1184	-	2024-10-09	-	-
Fxa7Dg102086.1	051462ddfebaacf74cddd68304c92b51	1184	Phobius	NON_CYTOPLASMIC_DOMAIN	Region of a membrane-bound protein predicted to be outside the membrane, in the extracellular region.	268	877	-	2024-10-09	-	-
Fxa7Dg102086.1	051462ddfebaacf74cddd68304c92b51	1184	Phobius	TRANSMEMBRANE	Region of a membrane-bound protein predicted to be embedded in the membrane.	878	901	-	2024-10-09	-	-
Fxa7Dg102086.1	051462ddfebaacf74cddd68304c92b51	1184	Phobius	TRANSMEMBRANE	Region of a membrane-bound protein predicted to be embedded in the membrane.	243	267	-	2024-10-09	-	-
Fxa7Dg102086.1	051462ddfebaacf74cddd68304c92b51	1184	Pfam	PF00314	Thaumatin family	14	228	2e-62	2024-10-09	IPR001938	Thaumatin family
Fxa7Dg102086.1	051462ddfebaacf74cddd68304c92b51	1184	Pfam	PF00314	Thaumatin family	659	851	1.7e-48	2024-10-09	IPR001938	Thaumatin family
Fxa7Dg102086.1	051462ddfebaacf74cddd68304c92b51	1184	Phobius	CYTOPLASMIC_DOMAIN	Region of a membrane-bound protein predicted to be outside the membrane, in the cytoplasm.	1	242	-	2024-10-09	-	-
Fxa6Ag104718.1	cfb25a5a50e08dadb85fa932f8e73d91	269	Pfam	PF00314	Thaumatin family	45	259	6.5e-74	2024-10-09	IPR001938	Thaumatin family
Fxa1Bg201005.1	158e99e375ea500fe8e13efd07c036a0	620	Phobius	CYTOPLASMIC_DOMAIN	Region of a membrane-bound protein predicted to be outside the membrane, in the cytoplasm.	297	316	-	2024-10-09	-	-
Fxa1Bg201005.1	158e99e375ea500fe8e13efd07c036a0	620	Phobius	TRANSMEMBRANE	Region of a membrane-bound protein predicted to be embedded in the membrane.	277	296	-	2024-10-09	-	-
Fxa1Bg201005.1	158e99e375ea500fe8e13efd07c036a0	620	Phobius	TRANSMEMBRANE	Region of a membrane-bound protein predicted to be embedded in the membrane.	601	618	-	2024-10-09	-	-
Fxa1Bg201005.1	158e99e375ea500fe8e13efd07c036a0	620	Phobius	CYTOPLASMIC_DOMAIN	Region of a membrane-bound protein predicted to be outside the membrane, in the cytoplasm.	619	620	-	2024-10-09	-	-
Fxa1Bg201005.1	158e99e375ea500fe8e13efd07c036a0	620	Phobius	TRANSMEMBRANE	Region of a membrane-bound protein predicted to be embedded in the membrane.	317	340	-	2024-10-09	-	-
Fxa1Bg201005.1	158e99e375ea500fe8e13efd07c036a0	620	Phobius	SIGNAL_PEPTIDE	Signal peptide region	1	24	-	2024-10-09	-	-
Fxa1Bg201005.1	158e99e375ea500fe8e13efd07c036a0	620	Phobius	SIGNAL_PEPTIDE_N_REGION	N-terminal region of a signal peptide.	1	8	-	2024-10-09	-	-
Fxa1Bg201005.1	158e99e375ea500fe8e13efd07c036a0	620	Phobius	NON_CYTOPLASMIC_DOMAIN	Region of a membrane-bound protein predicted to be outside the membrane, in the extracellular region.	341	600	-	2024-10-09	-	-
Fxa1Bg201005.1	158e99e375ea500fe8e13efd07c036a0	620	Phobius	SIGNAL_PEPTIDE_H_REGION	Hydrophobic region of a signal peptide.	9	19	-	2024-10-09	-	-
Fxa1Bg201005.1	158e99e375ea500fe8e13efd07c036a0	620	Pfam	PF00314	Thaumatin family	341	552	3.5e-80	2024-10-09	IPR001938	Thaumatin family
Fxa1Bg201005.1	158e99e375ea500fe8e13efd07c036a0	620	Pfam	PF00314	Thaumatin family	31	247	4.6e-80	2024-10-09	IPR001938	Thaumatin family
Fxa1Bg201005.1	158e99e375ea500fe8e13efd07c036a0	620	Phobius	SIGNAL_PEPTIDE_C_REGION	C-terminal region of a signal peptide.	20	24	-	2024-10-09	-	-
Fxa1Bg201005.1	158e99e375ea500fe8e13efd07c036a0	620	Phobius	NON_CYTOPLASMIC_DOMAIN	Region of a membrane-bound protein predicted to be outside the membrane, in the extracellular region.	25	276	-	2024-10-09	-	-
Fxa2Ag100154.1	3cf6c5c8902970753977e8de4df9f329	280	Pfam	PF00314	Thaumatin family	61	252	3.3e-62	2024-10-09	IPR001938	Thaumatin family
Fxa2Dg200117.1	c91340b465ff0262664291596e11853b	338	Phobius	SIGNAL_PEPTIDE	Signal peptide region	1	23	-	2024-10-09	-	-
Fxa2Dg200117.1	c91340b465ff0262664291596e11853b	338	Phobius	NON_CYTOPLASMIC_DOMAIN	Region of a membrane-bound protein predicted to be outside the membrane, in the extracellular region.	24	338	-	2024-10-09	-	-
Fxa2Dg200117.1	c91340b465ff0262664291596e11853b	338	Phobius	SIGNAL_PEPTIDE_C_REGION	C-terminal region of a signal peptide.	16	23	-	2024-10-09	-	-
Fxa2Dg200117.1	c91340b465ff0262664291596e11853b	338	Phobius	SIGNAL_PEPTIDE_N_REGION	N-terminal region of a signal peptide.	1	3	-	2024-10-09	-	-
Fxa2Dg200117.1	c91340b465ff0262664291596e11853b	338	Phobius	SIGNAL_PEPTIDE_H_REGION	Hydrophobic region of a signal peptide.	4	15	-	2024-10-09	-	-
Fxa2Dg200117.1	c91340b465ff0262664291596e11853b	338	Pfam	PF00314	Thaumatin family	30	239	3.9e-80	2024-10-09	IPR001938	Thaumatin family
Fxa2AgPR5_2	a6fb9ebf16c37453bc2894ddeb217b28	212	Pfam	PF00314	Thaumatin family	8	211	1.3e-72	2024-10-09	IPR001938	Thaumatin family
Fxa2Ag102647.1	277c6aa2613d1df81a18049b0bb214ca	388	Phobius	SIGNAL_PEPTIDE_N_REGION	N-terminal region of a signal peptide.	1	6	-	2024-10-09	-	-
Fxa2Ag102647.1	277c6aa2613d1df81a18049b0bb214ca	388	Pfam	PF00314	Thaumatin family	37	242	1.3e-72	2024-10-09	IPR001938	Thaumatin family
Fxa2Ag102647.1	277c6aa2613d1df81a18049b0bb214ca	388	Phobius	SIGNAL_PEPTIDE	Signal peptide region	1	29	-	2024-10-09	-	-
Fxa2Ag102647.1	277c6aa2613d1df81a18049b0bb214ca	388	Phobius	NON_CYTOPLASMIC_DOMAIN	Region of a membrane-bound protein predicted to be outside the membrane, in the extracellular region.	30	388	-	2024-10-09	-	-
Fxa2Ag102647.1	277c6aa2613d1df81a18049b0bb214ca	388	Phobius	SIGNAL_PEPTIDE_H_REGION	Hydrophobic region of a signal peptide.	7	20	-	2024-10-09	-	-
Fxa2Ag102647.1	277c6aa2613d1df81a18049b0bb214ca	388	Phobius	SIGNAL_PEPTIDE_C_REGION	C-terminal region of a signal peptide.	21	29	-	2024-10-09	-	-
Fxa2Ag102647.1	277c6aa2613d1df81a18049b0bb214ca	388	Pfam	PF03671	Ubiquitin fold modifier 1 protein	296	370	8.6e-38	2024-10-09	IPR005375	Ubiquitin-fold modifier 1
Fxa6Bg104290.1	ff065973ed66d5c93ef4fa53fafca2f0	295	Phobius	TRANSMEMBRANE	Region of a membrane-bound protein predicted to be embedded in the membrane.	54	77	-	2024-10-09	-	-
Fxa6Bg104290.1	ff065973ed66d5c93ef4fa53fafca2f0	295	Phobius	CYTOPLASMIC_DOMAIN	Region of a membrane-bound protein predicted to be outside the membrane, in the cytoplasm.	1	53	-	2024-10-09	-	-
Fxa6Bg104290.1	ff065973ed66d5c93ef4fa53fafca2f0	295	Phobius	NON_CYTOPLASMIC_DOMAIN	Region of a membrane-bound protein predicted to be outside the membrane, in the extracellular region.	78	295	-	2024-10-09	-	-
Fxa6Bg104290.1	ff065973ed66d5c93ef4fa53fafca2f0	295	Pfam	PF00314	Thaumatin family	86	285	4.2e-57	2024-10-09	IPR001938	Thaumatin family
Fxa2Ag103735.1	cc62774f65eaeb68ddb17597d4d3d88c	647	Phobius	SIGNAL_PEPTIDE	Signal peptide region	1	23	-	2024-10-09	-	-
Fxa2Ag103735.1	cc62774f65eaeb68ddb17597d4d3d88c	647	Phobius	SIGNAL_PEPTIDE_N_REGION	N-terminal region of a signal peptide.	1	3	-	2024-10-09	-	-
Fxa2Ag103735.1	cc62774f65eaeb68ddb17597d4d3d88c	647	Phobius	SIGNAL_PEPTIDE_H_REGION	Hydrophobic region of a signal peptide.	4	15	-	2024-10-09	-	-
Fxa2Ag103735.1	cc62774f65eaeb68ddb17597d4d3d88c	647	MobiDBLite	mobidb-lite	consensus disorder prediction	558	606	-	2024-10-09	-	-
Fxa2Ag103735.1	cc62774f65eaeb68ddb17597d4d3d88c	647	MobiDBLite	mobidb-lite	consensus disorder prediction	254	276	-	2024-10-09	-	-
Fxa2Ag103735.1	cc62774f65eaeb68ddb17597d4d3d88c	647	MobiDBLite	mobidb-lite	consensus disorder prediction	254	278	-	2024-10-09	-	-
Fxa2Ag103735.1	cc62774f65eaeb68ddb17597d4d3d88c	647	MobiDBLite	mobidb-lite	consensus disorder prediction	558	576	-	2024-10-09	-	-
Fxa2Ag103735.1	cc62774f65eaeb68ddb17597d4d3d88c	647	Pfam	PF00314	Thaumatin family	340	551	7.5e-78	2024-10-09	IPR001938	Thaumatin family
Fxa2Ag103735.1	cc62774f65eaeb68ddb17597d4d3d88c	647	Pfam	PF00314	Thaumatin family	30	247	1.7e-81	2024-10-09	IPR001938	Thaumatin family
Fxa2Ag103735.1	cc62774f65eaeb68ddb17597d4d3d88c	647	Phobius	CYTOPLASMIC_DOMAIN	Region of a membrane-bound protein predicted to be outside the membrane, in the cytoplasm.	647	647	-	2024-10-09	-	-
Fxa2Ag103735.1	cc62774f65eaeb68ddb17597d4d3d88c	647	Phobius	SIGNAL_PEPTIDE_C_REGION	C-terminal region of a signal peptide.	16	23	-	2024-10-09	-	-
Fxa2Ag103735.1	cc62774f65eaeb68ddb17597d4d3d88c	647	Phobius	NON_CYTOPLASMIC_DOMAIN	Region of a membrane-bound protein predicted to be outside the membrane, in the extracellular region.	24	624	-	2024-10-09	-	-
Fxa2Ag103735.1	cc62774f65eaeb68ddb17597d4d3d88c	647	MobiDBLite	mobidb-lite	consensus disorder prediction	577	593	-	2024-10-09	-	-
Fxa2Ag103735.1	cc62774f65eaeb68ddb17597d4d3d88c	647	Phobius	TRANSMEMBRANE	Region of a membrane-bound protein predicted to be embedded in the membrane.	625	646	-	2024-10-09	-	-
Fxa5Cg200149.1	1ccbb9089998087ccf1451d112a32f7a	413	Pfam	PF13456	Reverse transcriptase-like	81	198	5.1e-14	2024-10-09	IPR002156	Ribonuclease H domain
Fxa5Cg200149.1	1ccbb9089998087ccf1451d112a32f7a	413	Pfam	PF00314	Thaumatin family	231	413	1.1e-53	2024-10-09	IPR001938	Thaumatin family
Fxa7Cg102993.1	b66ae9ead9ddedb9b92bacda7aba381b	112	Phobius	NON_CYTOPLASMIC_DOMAIN	Region of a membrane-bound protein predicted to be outside the membrane, in the extracellular region.	1	43	-	2024-10-09	-	-
Fxa7Cg102993.1	b66ae9ead9ddedb9b92bacda7aba381b	112	Phobius	TRANSMEMBRANE	Region of a membrane-bound protein predicted to be embedded in the membrane.	44	63	-	2024-10-09	-	-
Fxa7Cg102993.1	b66ae9ead9ddedb9b92bacda7aba381b	112	Phobius	CYTOPLASMIC_DOMAIN	Region of a membrane-bound protein predicted to be outside the membrane, in the cytoplasm.	64	112	-	2024-10-09	-	-
Fxa2Cg203404.1	afaf898e8c173cc234eb71f8c9994327	286	Phobius	TRANSMEMBRANE	Region of a membrane-bound protein predicted to be embedded in the membrane.	6	23	-	2024-10-09	-	-
Fxa2Cg203404.1	afaf898e8c173cc234eb71f8c9994327	286	Pfam	PF00314	Thaumatin family	37	242	2e-73	2024-10-09	IPR001938	Thaumatin family
Fxa2Cg203404.1	afaf898e8c173cc234eb71f8c9994327	286	Phobius	TRANSMEMBRANE	Region of a membrane-bound protein predicted to be embedded in the membrane.	269	285	-	2024-10-09	-	-
Fxa2Cg203404.1	afaf898e8c173cc234eb71f8c9994327	286	Phobius	CYTOPLASMIC_DOMAIN	Region of a membrane-bound protein predicted to be outside the membrane, in the cytoplasm.	24	268	-	2024-10-09	-	-
Fxa2Cg203404.1	afaf898e8c173cc234eb71f8c9994327	286	Phobius	NON_CYTOPLASMIC_DOMAIN	Region of a membrane-bound protein predicted to be outside the membrane, in the extracellular region.	1	5	-	2024-10-09	-	-
Fxa2Cg203404.1	afaf898e8c173cc234eb71f8c9994327	286	Phobius	NON_CYTOPLASMIC_DOMAIN	Region of a membrane-bound protein predicted to be outside the membrane, in the extracellular region.	286	286	-	2024-10-09	-	-
Fxa2Dg203292.1	3b10d332f4403563c22e4d7c2e994199	736	MobiDBLite	mobidb-lite	consensus disorder prediction	609	626	-	2024-10-09	-	-
Fxa2Dg203292.1	3b10d332f4403563c22e4d7c2e994199	736	MobiDBLite	mobidb-lite	consensus disorder prediction	609	653	-	2024-10-09	-	-
Fxa2Dg203292.1	3b10d332f4403563c22e4d7c2e994199	736	Pfam	PF00314	Thaumatin family	390	601	1.3e-77	2024-10-09	IPR001938	Thaumatin family
Fxa2Dg203292.1	3b10d332f4403563c22e4d7c2e994199	736	Pfam	PF00314	Thaumatin family	79	296	3.7e-82	2024-10-09	IPR001938	Thaumatin family
Fxa2Dg203292.1	3b10d332f4403563c22e4d7c2e994199	736	Phobius	NON_CYTOPLASMIC_DOMAIN	Region of a membrane-bound protein predicted to be outside the membrane, in the extracellular region.	1	49	-	2024-10-09	-	-
Fxa2Dg203292.1	3b10d332f4403563c22e4d7c2e994199	736	MobiDBLite	mobidb-lite	consensus disorder prediction	303	327	-	2024-10-09	-	-
Fxa2Dg203292.1	3b10d332f4403563c22e4d7c2e994199	736	Phobius	NON_CYTOPLASMIC_DOMAIN	Region of a membrane-bound protein predicted to be outside the membrane, in the extracellular region.	390	736	-	2024-10-09	-	-
Fxa2Dg203292.1	3b10d332f4403563c22e4d7c2e994199	736	Phobius	CYTOPLASMIC_DOMAIN	Region of a membrane-bound protein predicted to be outside the membrane, in the cytoplasm.	72	364	-	2024-10-09	-	-
Fxa2Dg203292.1	3b10d332f4403563c22e4d7c2e994199	736	MobiDBLite	mobidb-lite	consensus disorder prediction	627	643	-	2024-10-09	-	-
Fxa2Dg203292.1	3b10d332f4403563c22e4d7c2e994199	736	Phobius	TRANSMEMBRANE	Region of a membrane-bound protein predicted to be embedded in the membrane.	365	389	-	2024-10-09	-	-
Fxa2Dg203292.1	3b10d332f4403563c22e4d7c2e994199	736	Phobius	TRANSMEMBRANE	Region of a membrane-bound protein predicted to be embedded in the membrane.	50	71	-	2024-10-09	-	-
Fxa5Ag201527.1	813f31f7f772b5648f44145b03f12199	253	Phobius	NON_CYTOPLASMIC_DOMAIN	Region of a membrane-bound protein predicted to be outside the membrane, in the extracellular region.	30	253	-	2024-10-09	-	-
Fxa5Ag201527.1	813f31f7f772b5648f44145b03f12199	253	Phobius	SIGNAL_PEPTIDE	Signal peptide region	1	29	-	2024-10-09	-	-
Fxa5Ag201527.1	813f31f7f772b5648f44145b03f12199	253	Pfam	PF00314	Thaumatin family	36	248	9.6e-80	2024-10-09	IPR001938	Thaumatin family
Fxa5Ag201527.1	813f31f7f772b5648f44145b03f12199	253	Phobius	SIGNAL_PEPTIDE_N_REGION	N-terminal region of a signal peptide.	1	8	-	2024-10-09	-	-
Fxa5Ag201527.1	813f31f7f772b5648f44145b03f12199	253	Phobius	SIGNAL_PEPTIDE_H_REGION	Hydrophobic region of a signal peptide.	9	20	-	2024-10-09	-	-
Fxa5Ag201527.1	813f31f7f772b5648f44145b03f12199	253	Phobius	SIGNAL_PEPTIDE_C_REGION	C-terminal region of a signal peptide.	21	29	-	2024-10-09	-	-
Fxa2Dg203504.1	65144675fafd49a7724d1201cdada06a	255	Phobius	SIGNAL_PEPTIDE_H_REGION	Hydrophobic region of a signal peptide.	10	22	-	2024-10-09	-	-
Fxa2Dg203504.1	65144675fafd49a7724d1201cdada06a	255	Phobius	SIGNAL_PEPTIDE_N_REGION	N-terminal region of a signal peptide.	1	9	-	2024-10-09	-	-
Fxa2Dg203504.1	65144675fafd49a7724d1201cdada06a	255	Phobius	SIGNAL_PEPTIDE_C_REGION	C-terminal region of a signal peptide.	23	30	-	2024-10-09	-	-
Fxa2Dg203504.1	65144675fafd49a7724d1201cdada06a	255	Phobius	NON_CYTOPLASMIC_DOMAIN	Region of a membrane-bound protein predicted to be outside the membrane, in the extracellular region.	31	255	-	2024-10-09	-	-
Fxa2Dg203504.1	65144675fafd49a7724d1201cdada06a	255	Pfam	PF00314	Thaumatin family	37	251	2e-77	2024-10-09	IPR001938	Thaumatin family
Fxa2Dg203504.1	65144675fafd49a7724d1201cdada06a	255	Phobius	SIGNAL_PEPTIDE	Signal peptide region	1	30	-	2024-10-09	-	-
Fxa6Dg102067.1	b3119eb2737b9e5b0651ded9c3320610	204	Pfam	PF00314	Thaumatin family	2	203	6.5e-60	2024-10-09	IPR001938	Thaumatin family
Fxa2Cg200322.1	42e5b273589a7dc7d1fbb6e9eff0c6eb	677	Phobius	SIGNAL_PEPTIDE	Signal peptide region	1	23	-	2024-10-09	-	-
Fxa2Cg200322.1	42e5b273589a7dc7d1fbb6e9eff0c6eb	677	Phobius	SIGNAL_PEPTIDE_H_REGION	Hydrophobic region of a signal peptide.	4	15	-	2024-10-09	-	-
Fxa2Cg200322.1	42e5b273589a7dc7d1fbb6e9eff0c6eb	677	Phobius	SIGNAL_PEPTIDE_N_REGION	N-terminal region of a signal peptide.	1	3	-	2024-10-09	-	-
Fxa2Cg200322.1	42e5b273589a7dc7d1fbb6e9eff0c6eb	677	Phobius	CYTOPLASMIC_DOMAIN	Region of a membrane-bound protein predicted to be outside the membrane, in the cytoplasm.	309	314	-	2024-10-09	-	-
Fxa2Cg200322.1	42e5b273589a7dc7d1fbb6e9eff0c6eb	677	MobiDBLite	mobidb-lite	consensus disorder prediction	574	590	-	2024-10-09	-	-
Fxa2Cg200322.1	42e5b273589a7dc7d1fbb6e9eff0c6eb	677	Phobius	NON_CYTOPLASMIC_DOMAIN	Region of a membrane-bound protein predicted to be outside the membrane, in the extracellular region.	337	677	-	2024-10-09	-	-
Fxa2Cg200322.1	42e5b273589a7dc7d1fbb6e9eff0c6eb	677	MobiDBLite	mobidb-lite	consensus disorder prediction	555	606	-	2024-10-09	-	-
Fxa2Cg200322.1	42e5b273589a7dc7d1fbb6e9eff0c6eb	677	MobiDBLite	mobidb-lite	consensus disorder prediction	242	264	-	2024-10-09	-	-
Fxa2Cg200322.1	42e5b273589a7dc7d1fbb6e9eff0c6eb	677	Pfam	PF00314	Thaumatin family	55	235	1.4e-68	2024-10-09	IPR001938	Thaumatin family
Fxa2Cg200322.1	42e5b273589a7dc7d1fbb6e9eff0c6eb	677	Pfam	PF00314	Thaumatin family	337	548	4.8e-79	2024-10-09	IPR001938	Thaumatin family
Fxa2Cg200322.1	42e5b273589a7dc7d1fbb6e9eff0c6eb	677	MobiDBLite	mobidb-lite	consensus disorder prediction	555	573	-	2024-10-09	-	-
Fxa2Cg200322.1	42e5b273589a7dc7d1fbb6e9eff0c6eb	677	Phobius	NON_CYTOPLASMIC_DOMAIN	Region of a membrane-bound protein predicted to be outside the membrane, in the extracellular region.	24	286	-	2024-10-09	-	-
Fxa2Cg200322.1	42e5b273589a7dc7d1fbb6e9eff0c6eb	677	Phobius	TRANSMEMBRANE	Region of a membrane-bound protein predicted to be embedded in the membrane.	287	308	-	2024-10-09	-	-
Fxa2Cg200322.1	42e5b273589a7dc7d1fbb6e9eff0c6eb	677	Phobius	TRANSMEMBRANE	Region of a membrane-bound protein predicted to be embedded in the membrane.	315	336	-	2024-10-09	-	-
Fxa2Cg200322.1	42e5b273589a7dc7d1fbb6e9eff0c6eb	677	Phobius	SIGNAL_PEPTIDE_C_REGION	C-terminal region of a signal peptide.	16	23	-	2024-10-09	-	-
Fxa4Bg100334.1	6e5a8727fadeedbce0e2fdcf2c026a2f	247	Phobius	NON_CYTOPLASMIC_DOMAIN	Region of a membrane-bound protein predicted to be outside the membrane, in the extracellular region.	1	223	-	2024-10-09	-	-
Fxa4Bg100334.1	6e5a8727fadeedbce0e2fdcf2c026a2f	247	Phobius	CYTOPLASMIC_DOMAIN	Region of a membrane-bound protein predicted to be outside the membrane, in the cytoplasm.	246	247	-	2024-10-09	-	-
Fxa4Bg100334.1	6e5a8727fadeedbce0e2fdcf2c026a2f	247	Phobius	TRANSMEMBRANE	Region of a membrane-bound protein predicted to be embedded in the membrane.	224	245	-	2024-10-09	-	-
Fxa4Bg100334.1	6e5a8727fadeedbce0e2fdcf2c026a2f	247	Pfam	PF00314	Thaumatin family	10	213	3.5e-74	2024-10-09	IPR001938	Thaumatin family
Fxa5Bg100536.1	b899be312a86aac7570ec11b765ebc7c	462	Pfam	PF00314	Thaumatin family	261	461	7.2e-54	2024-10-09	IPR001938	Thaumatin family
Fxa5Bg100536.1	b899be312a86aac7570ec11b765ebc7c	462	Pfam	PF00314	Thaumatin family	29	246	5.3e-66	2024-10-09	IPR001938	Thaumatin family
Fxa5Bg100536.1	b899be312a86aac7570ec11b765ebc7c	462	Phobius	SIGNAL_PEPTIDE_N_REGION	N-terminal region of a signal peptide.	1	4	-	2024-10-09	-	-
Fxa5Bg100536.1	b899be312a86aac7570ec11b765ebc7c	462	Phobius	NON_CYTOPLASMIC_DOMAIN	Region of a membrane-bound protein predicted to be outside the membrane, in the extracellular region.	23	462	-	2024-10-09	-	-
Fxa5Bg100536.1	b899be312a86aac7570ec11b765ebc7c	462	Phobius	SIGNAL_PEPTIDE_H_REGION	Hydrophobic region of a signal peptide.	5	17	-	2024-10-09	-	-
Fxa5Bg100536.1	b899be312a86aac7570ec11b765ebc7c	462	Phobius	SIGNAL_PEPTIDE_C_REGION	C-terminal region of a signal peptide.	18	22	-	2024-10-09	-	-
Fxa5Bg100536.1	b899be312a86aac7570ec11b765ebc7c	462	Phobius	SIGNAL_PEPTIDE	Signal peptide region	1	22	-	2024-10-09	-	-
Fxa6Cg104196.1	32ce96b6431a8ff7b41a31db9a3fde7b	259	Phobius	SIGNAL_PEPTIDE_H_REGION	Hydrophobic region of a signal peptide.	3	21	-	2024-10-09	-	-
Fxa6Cg104196.1	32ce96b6431a8ff7b41a31db9a3fde7b	259	Pfam	PF00314	Thaumatin family	35	249	3.1e-75	2024-10-09	IPR001938	Thaumatin family
Fxa6Cg104196.1	32ce96b6431a8ff7b41a31db9a3fde7b	259	Phobius	SIGNAL_PEPTIDE	Signal peptide region	1	26	-	2024-10-09	-	-
Fxa6Cg104196.1	32ce96b6431a8ff7b41a31db9a3fde7b	259	Phobius	SIGNAL_PEPTIDE_C_REGION	C-terminal region of a signal peptide.	22	26	-	2024-10-09	-	-
Fxa6Cg104196.1	32ce96b6431a8ff7b41a31db9a3fde7b	259	Phobius	NON_CYTOPLASMIC_DOMAIN	Region of a membrane-bound protein predicted to be outside the membrane, in the extracellular region.	27	259	-	2024-10-09	-	-
Fxa6Cg104196.1	32ce96b6431a8ff7b41a31db9a3fde7b	259	Phobius	SIGNAL_PEPTIDE_N_REGION	N-terminal region of a signal peptide.	1	2	-	2024-10-09	-	-
Fxa7Cg102113.1	00364baba1c83abd5e4d429cf9610b22	290	Phobius	CYTOPLASMIC_DOMAIN	Region of a membrane-bound protein predicted to be outside the membrane, in the cytoplasm.	64	290	-	2024-10-09	-	-
Fxa7Cg102113.1	00364baba1c83abd5e4d429cf9610b22	290	Phobius	CYTOPLASMIC_DOMAIN	Region of a membrane-bound protein predicted to be outside the membrane, in the cytoplasm.	1	6	-	2024-10-09	-	-
Fxa7Cg102113.1	00364baba1c83abd5e4d429cf9610b22	290	Phobius	TRANSMEMBRANE	Region of a membrane-bound protein predicted to be embedded in the membrane.	46	63	-	2024-10-09	-	-
Fxa7Cg102113.1	00364baba1c83abd5e4d429cf9610b22	290	Pfam	PF00314	Thaumatin family	72	286	3.8e-75	2024-10-09	IPR001938	Thaumatin family
Fxa7Cg102113.1	00364baba1c83abd5e4d429cf9610b22	290	Phobius	NON_CYTOPLASMIC_DOMAIN	Region of a membrane-bound protein predicted to be outside the membrane, in the extracellular region.	27	45	-	2024-10-09	-	-
Fxa7Cg102113.1	00364baba1c83abd5e4d429cf9610b22	290	Phobius	TRANSMEMBRANE	Region of a membrane-bound protein predicted to be embedded in the membrane.	7	26	-	2024-10-09	-	-
Fxa5Bg101475.1	0f960f5f21151036cf818655fc8ec17b	253	Phobius	NON_CYTOPLASMIC_DOMAIN	Region of a membrane-bound protein predicted to be outside the membrane, in the extracellular region.	30	253	-	2024-10-09	-	-
Fxa5Bg101475.1	0f960f5f21151036cf818655fc8ec17b	253	Phobius	SIGNAL_PEPTIDE	Signal peptide region	1	29	-	2024-10-09	-	-
Fxa5Bg101475.1	0f960f5f21151036cf818655fc8ec17b	253	Phobius	SIGNAL_PEPTIDE_N_REGION	N-terminal region of a signal peptide.	1	8	-	2024-10-09	-	-
Fxa5Bg101475.1	0f960f5f21151036cf818655fc8ec17b	253	Phobius	SIGNAL_PEPTIDE_H_REGION	Hydrophobic region of a signal peptide.	9	20	-	2024-10-09	-	-
Fxa5Bg101475.1	0f960f5f21151036cf818655fc8ec17b	253	Pfam	PF00314	Thaumatin family	36	248	5.8e-80	2024-10-09	IPR001938	Thaumatin family
Fxa5Bg101475.1	0f960f5f21151036cf818655fc8ec17b	253	Phobius	SIGNAL_PEPTIDE_C_REGION	C-terminal region of a signal peptide.	21	29	-	2024-10-09	-	-
Fxa7Bg203081.1	51ee76095892529d9038739291832021	332	Phobius	NON_CYTOPLASMIC_DOMAIN	Region of a membrane-bound protein predicted to be outside the membrane, in the extracellular region.	65	314	-	2024-10-09	-	-
Fxa7Bg203081.1	51ee76095892529d9038739291832021	332	Phobius	CYTOPLASMIC_DOMAIN	Region of a membrane-bound protein predicted to be outside the membrane, in the cytoplasm.	332	332	-	2024-10-09	-	-
Fxa7Bg203081.1	51ee76095892529d9038739291832021	332	Phobius	CYTOPLASMIC_DOMAIN	Region of a membrane-bound protein predicted to be outside the membrane, in the cytoplasm.	1	43	-	2024-10-09	-	-
Fxa7Bg203081.1	51ee76095892529d9038739291832021	332	Phobius	TRANSMEMBRANE	Region of a membrane-bound protein predicted to be embedded in the membrane.	315	331	-	2024-10-09	-	-
Fxa7Bg203081.1	51ee76095892529d9038739291832021	332	Phobius	TRANSMEMBRANE	Region of a membrane-bound protein predicted to be embedded in the membrane.	44	64	-	2024-10-09	-	-
Fxa7Bg203081.1	51ee76095892529d9038739291832021	332	Pfam	PF00314	Thaumatin family	66	281	1.4e-77	2024-10-09	IPR001938	Thaumatin family
Fxa6Cg101468.1	11109a22812d8215d4cfbbb6cfda83b3	245	Phobius	SIGNAL_PEPTIDE	Signal peptide region	1	23	-	2024-10-09	-	-
Fxa6Cg101468.1	11109a22812d8215d4cfbbb6cfda83b3	245	Phobius	SIGNAL_PEPTIDE_N_REGION	N-terminal region of a signal peptide.	1	6	-	2024-10-09	-	-
Fxa6Cg101468.1	11109a22812d8215d4cfbbb6cfda83b3	245	Phobius	SIGNAL_PEPTIDE_C_REGION	C-terminal region of a signal peptide.	19	23	-	2024-10-09	-	-
Fxa6Cg101468.1	11109a22812d8215d4cfbbb6cfda83b3	245	Phobius	NON_CYTOPLASMIC_DOMAIN	Region of a membrane-bound protein predicted to be outside the membrane, in the extracellular region.	24	245	-	2024-10-09	-	-
Fxa6Cg101468.1	11109a22812d8215d4cfbbb6cfda83b3	245	Pfam	PF00314	Thaumatin family	30	245	1.1e-73	2024-10-09	IPR001938	Thaumatin family
Fxa6Cg101468.1	11109a22812d8215d4cfbbb6cfda83b3	245	Phobius	SIGNAL_PEPTIDE_H_REGION	Hydrophobic region of a signal peptide.	7	18	-	2024-10-09	-	-
Fxa7Ag202260.1	b581f490cd058b5dc4bb4fc9777d48cc	290	Phobius	CYTOPLASMIC_DOMAIN	Region of a membrane-bound protein predicted to be outside the membrane, in the cytoplasm.	64	290	-	2024-10-09	-	-
Fxa7Ag202260.1	b581f490cd058b5dc4bb4fc9777d48cc	290	Phobius	TRANSMEMBRANE	Region of a membrane-bound protein predicted to be embedded in the membrane.	46	63	-	2024-10-09	-	-
Fxa7Ag202260.1	b581f490cd058b5dc4bb4fc9777d48cc	290	Phobius	CYTOPLASMIC_DOMAIN	Region of a membrane-bound protein predicted to be outside the membrane, in the cytoplasm.	1	6	-	2024-10-09	-	-
Fxa7Ag202260.1	b581f490cd058b5dc4bb4fc9777d48cc	290	Pfam	PF00314	Thaumatin family	72	286	3.7e-75	2024-10-09	IPR001938	Thaumatin family
Fxa7Ag202260.1	b581f490cd058b5dc4bb4fc9777d48cc	290	Phobius	NON_CYTOPLASMIC_DOMAIN	Region of a membrane-bound protein predicted to be outside the membrane, in the extracellular region.	27	45	-	2024-10-09	-	-
Fxa7Ag202260.1	b581f490cd058b5dc4bb4fc9777d48cc	290	Phobius	TRANSMEMBRANE	Region of a membrane-bound protein predicted to be embedded in the membrane.	7	26	-	2024-10-09	-	-
Fxa7Dg101961.1	b581f490cd058b5dc4bb4fc9777d48cc	290	Phobius	CYTOPLASMIC_DOMAIN	Region of a membrane-bound protein predicted to be outside the membrane, in the cytoplasm.	64	290	-	2024-10-09	-	-
Fxa7Dg101961.1	b581f490cd058b5dc4bb4fc9777d48cc	290	Phobius	TRANSMEMBRANE	Region of a membrane-bound protein predicted to be embedded in the membrane.	46	63	-	2024-10-09	-	-
Fxa7Dg101961.1	b581f490cd058b5dc4bb4fc9777d48cc	290	Phobius	CYTOPLASMIC_DOMAIN	Region of a membrane-bound protein predicted to be outside the membrane, in the cytoplasm.	1	6	-	2024-10-09	-	-
Fxa7Dg101961.1	b581f490cd058b5dc4bb4fc9777d48cc	290	Pfam	PF00314	Thaumatin family	72	286	3.7e-75	2024-10-09	IPR001938	Thaumatin family
Fxa7Dg101961.1	b581f490cd058b5dc4bb4fc9777d48cc	290	Phobius	NON_CYTOPLASMIC_DOMAIN	Region of a membrane-bound protein predicted to be outside the membrane, in the extracellular region.	27	45	-	2024-10-09	-	-
Fxa7Dg101961.1	b581f490cd058b5dc4bb4fc9777d48cc	290	Phobius	TRANSMEMBRANE	Region of a membrane-bound protein predicted to be embedded in the membrane.	7	26	-	2024-10-09	-	-
Fxa6Bg101114.1	7e5ad15d9aab8830d861a92489a8445d	244	Phobius	NON_CYTOPLASMIC_DOMAIN	Region of a membrane-bound protein predicted to be outside the membrane, in the extracellular region.	23	244	-	2024-10-09	-	-
Fxa6Bg101114.1	7e5ad15d9aab8830d861a92489a8445d	244	Phobius	SIGNAL_PEPTIDE_C_REGION	C-terminal region of a signal peptide.	18	22	-	2024-10-09	-	-
Fxa6Bg101114.1	7e5ad15d9aab8830d861a92489a8445d	244	Phobius	SIGNAL_PEPTIDE_H_REGION	Hydrophobic region of a signal peptide.	6	17	-	2024-10-09	-	-
Fxa6Bg101114.1	7e5ad15d9aab8830d861a92489a8445d	244	Phobius	SIGNAL_PEPTIDE_N_REGION	N-terminal region of a signal peptide.	1	5	-	2024-10-09	-	-
Fxa6Bg101114.1	7e5ad15d9aab8830d861a92489a8445d	244	Pfam	PF00314	Thaumatin family	29	242	8.3e-79	2024-10-09	IPR001938	Thaumatin family
Fxa6Bg101114.1	7e5ad15d9aab8830d861a92489a8445d	244	Phobius	SIGNAL_PEPTIDE	Signal peptide region	1	22	-	2024-10-09	-	-
Fxa5Cg200150.1	23812419d5477a8e6a8e9e289f2606e1	226	Phobius	SIGNAL_PEPTIDE	Signal peptide region	1	23	-	2024-10-09	-	-
Fxa5Cg200150.1	23812419d5477a8e6a8e9e289f2606e1	226	Phobius	NON_CYTOPLASMIC_DOMAIN	Region of a membrane-bound protein predicted to be outside the membrane, in the extracellular region.	24	226	-	2024-10-09	-	-
Fxa5Cg200150.1	23812419d5477a8e6a8e9e289f2606e1	226	Phobius	SIGNAL_PEPTIDE_N_REGION	N-terminal region of a signal peptide.	1	6	-	2024-10-09	-	-
Fxa5Cg200150.1	23812419d5477a8e6a8e9e289f2606e1	226	Phobius	SIGNAL_PEPTIDE_C_REGION	C-terminal region of a signal peptide.	19	23	-	2024-10-09	-	-
Fxa5Cg200150.1	23812419d5477a8e6a8e9e289f2606e1	226	Pfam	PF00314	Thaumatin family	30	226	5.4e-59	2024-10-09	IPR001938	Thaumatin family
Fxa5Cg200150.1	23812419d5477a8e6a8e9e289f2606e1	226	Phobius	SIGNAL_PEPTIDE_H_REGION	Hydrophobic region of a signal peptide.	7	18	-	2024-10-09	-	-
Fxa6Dg104105.1	344a8bba1d5bbe48f1e5ecc6ad8cc46e	262	Phobius	SIGNAL_PEPTIDE_H_REGION	Hydrophobic region of a signal peptide.	6	24	-	2024-10-09	-	-
Fxa6Dg104105.1	344a8bba1d5bbe48f1e5ecc6ad8cc46e	262	Phobius	SIGNAL_PEPTIDE_C_REGION	C-terminal region of a signal peptide.	25	29	-	2024-10-09	-	-
Fxa6Dg104105.1	344a8bba1d5bbe48f1e5ecc6ad8cc46e	262	Phobius	SIGNAL_PEPTIDE	Signal peptide region	1	29	-	2024-10-09	-	-
Fxa6Dg104105.1	344a8bba1d5bbe48f1e5ecc6ad8cc46e	262	Phobius	NON_CYTOPLASMIC_DOMAIN	Region of a membrane-bound protein predicted to be outside the membrane, in the extracellular region.	30	262	-	2024-10-09	-	-
Fxa6Dg104105.1	344a8bba1d5bbe48f1e5ecc6ad8cc46e	262	Pfam	PF00314	Thaumatin family	38	252	1.2e-74	2024-10-09	IPR001938	Thaumatin family
Fxa6Dg104105.1	344a8bba1d5bbe48f1e5ecc6ad8cc46e	262	Phobius	SIGNAL_PEPTIDE_N_REGION	N-terminal region of a signal peptide.	1	5	-	2024-10-09	-	-
Fxa7Bg202286.1	708f08cfb141095a269bd63875baca16	1444	Phobius	TRANSMEMBRANE	Region of a membrane-bound protein predicted to be embedded in the membrane.	6	29	-	2024-10-09	-	-
Fxa7Bg202286.1	708f08cfb141095a269bd63875baca16	1444	Pfam	PF00314	Thaumatin family	45	258	1.1e-52	2024-10-09	IPR001938	Thaumatin family
Fxa7Bg202286.1	708f08cfb141095a269bd63875baca16	1444	Pfam	PF00314	Thaumatin family	813	1028	3.8e-68	2024-10-09	IPR001938	Thaumatin family
Fxa7Bg202286.1	708f08cfb141095a269bd63875baca16	1444	Pfam	PF00314	Thaumatin family	694	804	1.3e-28	2024-10-09	IPR001938	Thaumatin family
Fxa7Bg202286.1	708f08cfb141095a269bd63875baca16	1444	Phobius	CYTOPLASMIC_DOMAIN	Region of a membrane-bound protein predicted to be outside the membrane, in the cytoplasm.	30	292	-	2024-10-09	-	-
Fxa7Bg202286.1	708f08cfb141095a269bd63875baca16	1444	Phobius	TRANSMEMBRANE	Region of a membrane-bound protein predicted to be embedded in the membrane.	1055	1078	-	2024-10-09	-	-
Fxa7Bg202286.1	708f08cfb141095a269bd63875baca16	1444	Pfam	PF07714	Protein tyrosine and serine/threonine kinase	352	621	2e-42	2024-10-09	IPR001245	Serine-threonine/tyrosine-protein kinase, catalytic domain
Fxa7Bg202286.1	708f08cfb141095a269bd63875baca16	1444	Pfam	PF07714	Protein tyrosine and serine/threonine kinase	1114	1383	1.8e-43	2024-10-09	IPR001245	Serine-threonine/tyrosine-protein kinase, catalytic domain
Fxa7Bg202286.1	708f08cfb141095a269bd63875baca16	1444	Phobius	NON_CYTOPLASMIC_DOMAIN	Region of a membrane-bound protein predicted to be outside the membrane, in the extracellular region.	1	5	-	2024-10-09	-	-
Fxa7Bg202286.1	708f08cfb141095a269bd63875baca16	1444	Phobius	TRANSMEMBRANE	Region of a membrane-bound protein predicted to be embedded in the membrane.	293	316	-	2024-10-09	-	-
Fxa7Bg202286.1	708f08cfb141095a269bd63875baca16	1444	Phobius	CYTOPLASMIC_DOMAIN	Region of a membrane-bound protein predicted to be outside the membrane, in the cytoplasm.	1079	1444	-	2024-10-09	-	-
Fxa7Bg202286.1	708f08cfb141095a269bd63875baca16	1444	Phobius	NON_CYTOPLASMIC_DOMAIN	Region of a membrane-bound protein predicted to be outside the membrane, in the extracellular region.	317	1054	-	2024-10-09	-	-
Fxa7Dg102828.1	cb1c506a3a26fbcbae409b04e6134db6	317	Phobius	TRANSMEMBRANE	Region of a membrane-bound protein predicted to be embedded in the membrane.	29	49	-	2024-10-09	-	-
Fxa7Dg102828.1	cb1c506a3a26fbcbae409b04e6134db6	317	Phobius	TRANSMEMBRANE	Region of a membrane-bound protein predicted to be embedded in the membrane.	300	316	-	2024-10-09	-	-
Fxa7Dg102828.1	cb1c506a3a26fbcbae409b04e6134db6	317	Phobius	NON_CYTOPLASMIC_DOMAIN	Region of a membrane-bound protein predicted to be outside the membrane, in the extracellular region.	50	299	-	2024-10-09	-	-
Fxa7Dg102828.1	cb1c506a3a26fbcbae409b04e6134db6	317	Phobius	CYTOPLASMIC_DOMAIN	Region of a membrane-bound protein predicted to be outside the membrane, in the cytoplasm.	317	317	-	2024-10-09	-	-
Fxa7Dg102828.1	cb1c506a3a26fbcbae409b04e6134db6	317	Phobius	CYTOPLASMIC_DOMAIN	Region of a membrane-bound protein predicted to be outside the membrane, in the cytoplasm.	1	28	-	2024-10-09	-	-
Fxa7Dg102828.1	cb1c506a3a26fbcbae409b04e6134db6	317	Pfam	PF00314	Thaumatin family	51	266	2.3e-79	2024-10-09	IPR001938	Thaumatin family
BAA74546_PR5_N.tabacum	e5fb33346fb0de8c972dfc91b524be34	238	Phobius	SIGNAL_PEPTIDE	Signal peptide region	1	21	-	2024-10-09	-	-
BAA74546_PR5_N.tabacum	e5fb33346fb0de8c972dfc91b524be34	238	Pfam	PF00314	Thaumatin family	28	238	3.4e-78	2024-10-09	IPR001938	Thaumatin family
BAA74546_PR5_N.tabacum	e5fb33346fb0de8c972dfc91b524be34	238	Phobius	NON_CYTOPLASMIC_DOMAIN	Region of a membrane-bound protein predicted to be outside the membrane, in the extracellular region.	22	238	-	2024-10-09	-	-
BAA74546_PR5_N.tabacum	e5fb33346fb0de8c972dfc91b524be34	238	Phobius	SIGNAL_PEPTIDE_H_REGION	Hydrophobic region of a signal peptide.	6	17	-	2024-10-09	-	-
BAA74546_PR5_N.tabacum	e5fb33346fb0de8c972dfc91b524be34	238	Phobius	SIGNAL_PEPTIDE_N_REGION	N-terminal region of a signal peptide.	1	5	-	2024-10-09	-	-
BAA74546_PR5_N.tabacum	e5fb33346fb0de8c972dfc91b524be34	238	Phobius	SIGNAL_PEPTIDE_C_REGION	C-terminal region of a signal peptide.	18	21	-	2024-10-09	-	-
Fxa7Ag202371.1	db2b2edd5ea4628ceba07a908d5f0aca	1524	Phobius	TRANSMEMBRANE	Region of a membrane-bound protein predicted to be embedded in the membrane.	899	921	-	2024-10-09	-	-
Fxa7Ag202371.1	db2b2edd5ea4628ceba07a908d5f0aca	1524	Phobius	CYTOPLASMIC_DOMAIN	Region of a membrane-bound protein predicted to be outside the membrane, in the cytoplasm.	300	898	-	2024-10-09	-	-
Fxa7Ag202371.1	db2b2edd5ea4628ceba07a908d5f0aca	1524	Phobius	SIGNAL_PEPTIDE_C_REGION	C-terminal region of a signal peptide.	21	24	-	2024-10-09	-	-
Fxa7Ag202371.1	db2b2edd5ea4628ceba07a908d5f0aca	1524	Phobius	NON_CYTOPLASMIC_DOMAIN	Region of a membrane-bound protein predicted to be outside the membrane, in the extracellular region.	922	1130	-	2024-10-09	-	-
Fxa7Ag202371.1	db2b2edd5ea4628ceba07a908d5f0aca	1524	Phobius	SIGNAL_PEPTIDE_N_REGION	N-terminal region of a signal peptide.	1	6	-	2024-10-09	-	-
Fxa7Ag202371.1	db2b2edd5ea4628ceba07a908d5f0aca	1524	Phobius	SIGNAL_PEPTIDE_H_REGION	Hydrophobic region of a signal peptide.	7	20	-	2024-10-09	-	-
Fxa7Ag202371.1	db2b2edd5ea4628ceba07a908d5f0aca	1524	Pfam	PF07714	Protein tyrosine and serine/threonine kinase	335	532	3.1e-42	2024-10-09	IPR001245	Serine-threonine/tyrosine-protein kinase, catalytic domain
Fxa7Ag202371.1	db2b2edd5ea4628ceba07a908d5f0aca	1524	Pfam	PF07714	Protein tyrosine and serine/threonine kinase	1190	1405	1.2e-42	2024-10-09	IPR001245	Serine-threonine/tyrosine-protein kinase, catalytic domain
Fxa7Ag202371.1	db2b2edd5ea4628ceba07a908d5f0aca	1524	Phobius	TRANSMEMBRANE	Region of a membrane-bound protein predicted to be embedded in the membrane.	1131	1154	-	2024-10-09	-	-
Fxa7Ag202371.1	db2b2edd5ea4628ceba07a908d5f0aca	1524	Phobius	NON_CYTOPLASMIC_DOMAIN	Region of a membrane-bound protein predicted to be outside the membrane, in the extracellular region.	25	275	-	2024-10-09	-	-
Fxa7Ag202371.1	db2b2edd5ea4628ceba07a908d5f0aca	1524	Phobius	CYTOPLASMIC_DOMAIN	Region of a membrane-bound protein predicted to be outside the membrane, in the cytoplasm.	1155	1524	-	2024-10-09	-	-
Fxa7Ag202371.1	db2b2edd5ea4628ceba07a908d5f0aca	1524	Phobius	TRANSMEMBRANE	Region of a membrane-bound protein predicted to be embedded in the membrane.	276	299	-	2024-10-09	-	-
Fxa7Ag202371.1	db2b2edd5ea4628ceba07a908d5f0aca	1524	Pfam	PF00314	Thaumatin family	688	905	2.7e-63	2024-10-09	IPR001938	Thaumatin family
Fxa7Ag202371.1	db2b2edd5ea4628ceba07a908d5f0aca	1524	Pfam	PF00314	Thaumatin family	933	1108	8.6e-50	2024-10-09	IPR001938	Thaumatin family
Fxa7Ag202371.1	db2b2edd5ea4628ceba07a908d5f0aca	1524	Pfam	PF00314	Thaumatin family	31	249	8.5e-46	2024-10-09	IPR001938	Thaumatin family
Fxa7Ag202371.1	db2b2edd5ea4628ceba07a908d5f0aca	1524	Phobius	SIGNAL_PEPTIDE	Signal peptide region	1	24	-	2024-10-09	-	-
Fxa1Dg200952.1	bd68d36fb62fc6fe98b2ae19ea6da4ef	702	Phobius	TRANSMEMBRANE	Region of a membrane-bound protein predicted to be embedded in the membrane.	277	296	-	2024-10-09	-	-
Fxa1Dg200952.1	bd68d36fb62fc6fe98b2ae19ea6da4ef	702	Pfam	PF00314	Thaumatin family	31	247	3e-80	2024-10-09	IPR001938	Thaumatin family
Fxa1Dg200952.1	bd68d36fb62fc6fe98b2ae19ea6da4ef	702	Pfam	PF00314	Thaumatin family	382	593	2.5e-80	2024-10-09	IPR001938	Thaumatin family
Fxa1Dg200952.1	bd68d36fb62fc6fe98b2ae19ea6da4ef	702	Phobius	CYTOPLASMIC_DOMAIN	Region of a membrane-bound protein predicted to be outside the membrane, in the cytoplasm.	297	359	-	2024-10-09	-	-
Fxa1Dg200952.1	bd68d36fb62fc6fe98b2ae19ea6da4ef	702	Phobius	SIGNAL_PEPTIDE	Signal peptide region	1	24	-	2024-10-09	-	-
Fxa1Dg200952.1	bd68d36fb62fc6fe98b2ae19ea6da4ef	702	Phobius	SIGNAL_PEPTIDE_H_REGION	Hydrophobic region of a signal peptide.	11	19	-	2024-10-09	-	-
Fxa1Dg200952.1	bd68d36fb62fc6fe98b2ae19ea6da4ef	702	Phobius	SIGNAL_PEPTIDE_C_REGION	C-terminal region of a signal peptide.	20	24	-	2024-10-09	-	-
Fxa1Dg200952.1	bd68d36fb62fc6fe98b2ae19ea6da4ef	702	Phobius	TRANSMEMBRANE	Region of a membrane-bound protein predicted to be embedded in the membrane.	642	659	-	2024-10-09	-	-
Fxa1Dg200952.1	bd68d36fb62fc6fe98b2ae19ea6da4ef	702	Phobius	TRANSMEMBRANE	Region of a membrane-bound protein predicted to be embedded in the membrane.	360	381	-	2024-10-09	-	-
Fxa1Dg200952.1	bd68d36fb62fc6fe98b2ae19ea6da4ef	702	Phobius	NON_CYTOPLASMIC_DOMAIN	Region of a membrane-bound protein predicted to be outside the membrane, in the extracellular region.	25	276	-	2024-10-09	-	-
Fxa1Dg200952.1	bd68d36fb62fc6fe98b2ae19ea6da4ef	702	Phobius	NON_CYTOPLASMIC_DOMAIN	Region of a membrane-bound protein predicted to be outside the membrane, in the extracellular region.	382	641	-	2024-10-09	-	-
Fxa1Dg200952.1	bd68d36fb62fc6fe98b2ae19ea6da4ef	702	Phobius	SIGNAL_PEPTIDE_N_REGION	N-terminal region of a signal peptide.	1	10	-	2024-10-09	-	-
Fxa1Dg200952.1	bd68d36fb62fc6fe98b2ae19ea6da4ef	702	Phobius	CYTOPLASMIC_DOMAIN	Region of a membrane-bound protein predicted to be outside the membrane, in the cytoplasm.	660	702	-	2024-10-09	-	-

## Sheet: PR6
Protein	Run	Length	Prediction	Identifier	Description	Start	End	E-value	Date	InterPro ID	Description
Fxa4CgPR6_4	3583eaa7c6a63c58e698596f798a7c96	64	Pfam	PF00280	Potato inhibitor I family	2	64	1.2e-16	2024-10-09	IPR000864	Proteinase inhibitor I13, potato inhibitor I
Fxa4Cg200182.1	59a4d4539e314590ef2fe5ee7c52b47d	72	Pfam	PF00280	Potato inhibitor I family	8	72	1.9e-19	2024-10-09	IPR000864	Proteinase inhibitor I13, potato inhibitor I
Fxa4CgPR6_9	f447dfa17818eb67a74c585ae61cf54e	65	Pfam	PF00280	Potato inhibitor I family	3	65	1.3e-21	2024-10-09	IPR000864	Proteinase inhibitor I13, potato inhibitor I
XP_004230669_PR6_S.lycopersicum	414a9477db86b06b1b46e35599ca09a3	164	Phobius	NON_CYTOPLASMIC_DOMAIN	Region of a membrane-bound protein predicted to be outside the membrane, in the extracellular region.	27	164	-	2024-10-09	-	-
XP_004230669_PR6_S.lycopersicum	414a9477db86b06b1b46e35599ca09a3	164	Pfam	PF00188	Cysteine-rich secretory protein family	34	152	4.8e-16	2024-10-09	IPR014044	CAP domain
XP_004230669_PR6_S.lycopersicum	414a9477db86b06b1b46e35599ca09a3	164	Phobius	SIGNAL_PEPTIDE	Signal peptide region	1	26	-	2024-10-09	-	-
XP_004230669_PR6_S.lycopersicum	414a9477db86b06b1b46e35599ca09a3	164	Phobius	SIGNAL_PEPTIDE_N_REGION	N-terminal region of a signal peptide.	1	8	-	2024-10-09	-	-
XP_004230669_PR6_S.lycopersicum	414a9477db86b06b1b46e35599ca09a3	164	Phobius	SIGNAL_PEPTIDE_H_REGION	Hydrophobic region of a signal peptide.	9	20	-	2024-10-09	-	-
XP_004230669_PR6_S.lycopersicum	414a9477db86b06b1b46e35599ca09a3	164	Phobius	SIGNAL_PEPTIDE_C_REGION	C-terminal region of a signal peptide.	21	26	-	2024-10-09	-	-
Fxa4Ag100208.1	fb7185c7b00ba3e39fde6a4aa883b466	145	Pfam	PF00280	Potato inhibitor I family	6	63	1.6e-17	2024-10-09	IPR000864	Proteinase inhibitor I13, potato inhibitor I
Fxa4Ag100208.1	fb7185c7b00ba3e39fde6a4aa883b466	145	Pfam	PF00280	Potato inhibitor I family	81	145	2.1e-17	2024-10-09	IPR000864	Proteinase inhibitor I13, potato inhibitor I
Fxa4AgPR6_1	4bac0fd39ca9f624f69b974435912ee3	62	Pfam	PF00280	Potato inhibitor I family	3	62	2.6e-22	2024-10-09	IPR000864	Proteinase inhibitor I13, potato inhibitor I
Fxa1Ag101473.1	8d8573689131d39360195e441e6dc812	92	Pfam	PF00280	Potato inhibitor I family	26	91	1.1e-16	2024-10-09	IPR000864	Proteinase inhibitor I13, potato inhibitor I
Fxa4BgPR6_3	1deb8fb6d3811e1b34023d9aef674b6e	62	Pfam	PF00280	Potato inhibitor I family	2	62	5.5e-21	2024-10-09	IPR000864	Proteinase inhibitor I13, potato inhibitor I
Fxa4Bg100204.1	5ffba85837bf43859fec75872f72288f	72	Pfam	PF00280	Potato inhibitor I family	10	71	1.4e-21	2024-10-09	IPR000864	Proteinase inhibitor I13, potato inhibitor I
Fxa4Ag100209.1	d3042fff32e6728d8d2f284fd62d36b0	147	Pfam	PF00280	Potato inhibitor I family	8	70	8.7e-21	2024-10-09	IPR000864	Proteinase inhibitor I13, potato inhibitor I
Fxa4Ag100209.1	d3042fff32e6728d8d2f284fd62d36b0	147	Pfam	PF00280	Potato inhibitor I family	85	147	1.4e-20	2024-10-09	IPR000864	Proteinase inhibitor I13, potato inhibitor I
Fxa4Bg100203.1	9a7bcfbcf9bafb05973023dfd1b11f13	145	Pfam	PF00280	Potato inhibitor I family	6	63	5.2e-17	2024-10-09	IPR000864	Proteinase inhibitor I13, potato inhibitor I
Fxa4Bg100203.1	9a7bcfbcf9bafb05973023dfd1b11f13	145	Pfam	PF00280	Potato inhibitor I family	81	145	2.9e-16	2024-10-09	IPR000864	Proteinase inhibitor I13, potato inhibitor I
Fxa4CgPR6_7	765999ac27d3641ee17dc2f8c59f7130	61	Pfam	PF00280	Potato inhibitor I family	2	61	4.1e-21	2024-10-09	IPR000864	Proteinase inhibitor I13, potato inhibitor I
Fxa4CgPR6_8	9899b0295c8fb385872e905c6c1d6a78	62	Pfam	PF00280	Potato inhibitor I family	2	62	3.7e-20	2024-10-09	IPR000864	Proteinase inhibitor I13, potato inhibitor I
Fxa4CgPR6_6	15a4db3536c8872ed349877edd69c6b7	65	Pfam	PF00280	Potato inhibitor I family	3	65	6.1e-22	2024-10-09	IPR000864	Proteinase inhibitor I13, potato inhibitor I
Fxa4CgPR6_5	15a4db3536c8872ed349877edd69c6b7	65	Pfam	PF00280	Potato inhibitor I family	3	65	6.1e-22	2024-10-09	IPR000864	Proteinase inhibitor I13, potato inhibitor I
Fxa4Cg200178.1	54f6e16325684db85026f067ea13afa8	145	Pfam	PF00280	Potato inhibitor I family	81	145	3.2e-16	2024-10-09	IPR000864	Proteinase inhibitor I13, potato inhibitor I
Fxa4Cg200178.1	54f6e16325684db85026f067ea13afa8	145	Pfam	PF00280	Potato inhibitor I family	6	63	8.9e-18	2024-10-09	IPR000864	Proteinase inhibitor I13, potato inhibitor I
Fxa4Bg100206.1	efca5576edfc39088418df1c3efa1940	149	Pfam	PF00280	Potato inhibitor I family	87	149	1.5e-20	2024-10-09	IPR000864	Proteinase inhibitor I13, potato inhibitor I
Fxa4Bg100206.1	efca5576edfc39088418df1c3efa1940	149	Pfam	PF00280	Potato inhibitor I family	10	72	4e-21	2024-10-09	IPR000864	Proteinase inhibitor I13, potato inhibitor I
Fxa4AgPR6_2	69d1a648f66a7389c082f252ce134af5	63	Pfam	PF00280	Potato inhibitor I family	1	63	3e-21	2024-10-09	IPR000864	Proteinase inhibitor I13, potato inhibitor I

## Sheet: PR7
Protein	Run	Length	Prediction	Identifier	Description	Start	End	E-value	Date	InterPro ID	Description
NP_001234257_PR7_S.lycopersicum	aed82031e2e698126d16acc84e6abad7	747	Pfam	PF02225	PA domain	379	451	6.8e-07	2024-10-09	IPR003137	PA domain
NP_001234257_PR7_S.lycopersicum	aed82031e2e698126d16acc84e6abad7	747	Phobius	SIGNAL_PEPTIDE_H_REGION	Hydrophobic region of a signal peptide.	6	17	-	2024-10-09	-	-
NP_001234257_PR7_S.lycopersicum	aed82031e2e698126d16acc84e6abad7	747	Pfam	PF17766	Fibronectin type-III domain	646	742	3.5e-27	2024-10-09	IPR041469	Subtilisin-like protease, fibronectin type-III domain
NP_001234257_PR7_S.lycopersicum	aed82031e2e698126d16acc84e6abad7	747	Phobius	NON_CYTOPLASMIC_DOMAIN	Region of a membrane-bound protein predicted to be outside the membrane, in the extracellular region.	23	747	-	2024-10-09	-	-
NP_001234257_PR7_S.lycopersicum	aed82031e2e698126d16acc84e6abad7	747	Phobius	SIGNAL_PEPTIDE_C_REGION	C-terminal region of a signal peptide.	18	22	-	2024-10-09	-	-
NP_001234257_PR7_S.lycopersicum	aed82031e2e698126d16acc84e6abad7	747	Phobius	SIGNAL_PEPTIDE_N_REGION	N-terminal region of a signal peptide.	1	5	-	2024-10-09	-	-
NP_001234257_PR7_S.lycopersicum	aed82031e2e698126d16acc84e6abad7	747	Pfam	PF05922	Peptidase inhibitor I9	26	113	6.5e-05	2024-10-09	IPR010259	Peptidase S8 propeptide/proteinase inhibitor I9
NP_001234257_PR7_S.lycopersicum	aed82031e2e698126d16acc84e6abad7	747	Phobius	SIGNAL_PEPTIDE	Signal peptide region	1	22	-	2024-10-09	-	-
NP_001234257_PR7_S.lycopersicum	aed82031e2e698126d16acc84e6abad7	747	Pfam	PF00082	Subtilase family	137	568	1.2e-47	2024-10-09	IPR000209	Peptidase S8/S53 domain
Fxa3Dg203009.1	741749d3cdfeda3e64f94cd32f49262c	952	Pfam	PF05922	Peptidase inhibitor I9	292	370	2.4e-09	2024-10-09	IPR010259	Peptidase S8 propeptide/proteinase inhibitor I9
Fxa3Dg203009.1	741749d3cdfeda3e64f94cd32f49262c	952	Pfam	PF00082	Subtilase family	23	134	2.4e-14	2024-10-09	IPR000209	Peptidase S8/S53 domain
Fxa3Dg203009.1	741749d3cdfeda3e64f94cd32f49262c	952	Pfam	PF17766	Fibronectin type-III domain	191	289	7e-22	2024-10-09	IPR041469	Subtilisin-like protease, fibronectin type-III domain
Fxa3Dg203009.1	741749d3cdfeda3e64f94cd32f49262c	952	Pfam	PF17766	Fibronectin type-III domain	878	947	1.8e-07	2024-10-09	IPR041469	Subtilisin-like protease, fibronectin type-III domain
Fxa3Dg203009.1	741749d3cdfeda3e64f94cd32f49262c	952	Pfam	PF00082	Subtilase family	392	816	6.2e-36	2024-10-09	IPR000209	Peptidase S8/S53 domain
Fxa4Bg100662.1	1e21a600d062f097eda19639f049be82	820	Phobius	SIGNAL_PEPTIDE_H_REGION	Hydrophobic region of a signal peptide.	9	21	-	2024-10-09	-	-
Fxa4Bg100662.1	1e21a600d062f097eda19639f049be82	820	Phobius	NON_CYTOPLASMIC_DOMAIN	Region of a membrane-bound protein predicted to be outside the membrane, in the extracellular region.	26	820	-	2024-10-09	-	-
Fxa4Bg100662.1	1e21a600d062f097eda19639f049be82	820	Pfam	PF00082	Subtilase family	157	638	1.6e-37	2024-10-09	IPR000209	Peptidase S8/S53 domain
Fxa4Bg100662.1	1e21a600d062f097eda19639f049be82	820	Phobius	SIGNAL_PEPTIDE_N_REGION	N-terminal region of a signal peptide.	1	8	-	2024-10-09	-	-
Fxa4Bg100662.1	1e21a600d062f097eda19639f049be82	820	Phobius	SIGNAL_PEPTIDE	Signal peptide region	1	25	-	2024-10-09	-	-
Fxa4Bg100662.1	1e21a600d062f097eda19639f049be82	820	Phobius	SIGNAL_PEPTIDE_C_REGION	C-terminal region of a signal peptide.	22	25	-	2024-10-09	-	-
Fxa4Bg100662.1	1e21a600d062f097eda19639f049be82	820	Pfam	PF17766	Fibronectin type-III domain	722	814	1.1e-14	2024-10-09	IPR041469	Subtilisin-like protease, fibronectin type-III domain
Fxa4Bg100662.1	1e21a600d062f097eda19639f049be82	820	Pfam	PF05922	Peptidase inhibitor I9	28	130	9.8e-11	2024-10-09	IPR010259	Peptidase S8 propeptide/proteinase inhibitor I9
Fxa5Bg100854.1	8c278fae2343cd10db384ff6229cda06	2725	Phobius	NON_CYTOPLASMIC_DOMAIN	Region of a membrane-bound protein predicted to be outside the membrane, in the extracellular region.	973	983	-	2024-10-09	-	-
Fxa5Bg100854.1	8c278fae2343cd10db384ff6229cda06	2725	Phobius	CYTOPLASMIC_DOMAIN	Region of a membrane-bound protein predicted to be outside the membrane, in the cytoplasm.	1117	1127	-	2024-10-09	-	-
Fxa5Bg100854.1	8c278fae2343cd10db384ff6229cda06	2725	Phobius	NON_CYTOPLASMIC_DOMAIN	Region of a membrane-bound protein predicted to be outside the membrane, in the extracellular region.	1085	1095	-	2024-10-09	-	-
Fxa5Bg100854.1	8c278fae2343cd10db384ff6229cda06	2725	Phobius	CYTOPLASMIC_DOMAIN	Region of a membrane-bound protein predicted to be outside the membrane, in the cytoplasm.	51	817	-	2024-10-09	-	-
Fxa5Bg100854.1	8c278fae2343cd10db384ff6229cda06	2725	Phobius	NON_CYTOPLASMIC_DOMAIN	Region of a membrane-bound protein predicted to be outside the membrane, in the extracellular region.	1	31	-	2024-10-09	-	-
Fxa5Bg100854.1	8c278fae2343cd10db384ff6229cda06	2725	Phobius	CYTOPLASMIC_DOMAIN	Region of a membrane-bound protein predicted to be outside the membrane, in the cytoplasm.	1006	1064	-	2024-10-09	-	-
Fxa5Bg100854.1	8c278fae2343cd10db384ff6229cda06	2725	Phobius	TRANSMEMBRANE	Region of a membrane-bound protein predicted to be embedded in the membrane.	1153	1177	-	2024-10-09	-	-
Fxa5Bg100854.1	8c278fae2343cd10db384ff6229cda06	2725	Phobius	TRANSMEMBRANE	Region of a membrane-bound protein predicted to be embedded in the membrane.	1206	1225	-	2024-10-09	-	-
Fxa5Bg100854.1	8c278fae2343cd10db384ff6229cda06	2725	Phobius	TRANSMEMBRANE	Region of a membrane-bound protein predicted to be embedded in the membrane.	950	972	-	2024-10-09	-	-
Fxa5Bg100854.1	8c278fae2343cd10db384ff6229cda06	2725	Phobius	TRANSMEMBRANE	Region of a membrane-bound protein predicted to be embedded in the membrane.	885	905	-	2024-10-09	-	-
Fxa5Bg100854.1	8c278fae2343cd10db384ff6229cda06	2725	Phobius	TRANSMEMBRANE	Region of a membrane-bound protein predicted to be embedded in the membrane.	1096	1116	-	2024-10-09	-	-
Fxa5Bg100854.1	8c278fae2343cd10db384ff6229cda06	2725	Phobius	TRANSMEMBRANE	Region of a membrane-bound protein predicted to be embedded in the membrane.	818	843	-	2024-10-09	-	-
Fxa5Bg100854.1	8c278fae2343cd10db384ff6229cda06	2725	Phobius	NON_CYTOPLASMIC_DOMAIN	Region of a membrane-bound protein predicted to be outside the membrane, in the extracellular region.	1148	1152	-	2024-10-09	-	-
Fxa5Bg100854.1	8c278fae2343cd10db384ff6229cda06	2725	Phobius	TRANSMEMBRANE	Region of a membrane-bound protein predicted to be embedded in the membrane.	32	50	-	2024-10-09	-	-
Fxa5Bg100854.1	8c278fae2343cd10db384ff6229cda06	2725	Pfam	PF17766	Fibronectin type-III domain	1868	1962	7.9e-22	2024-10-09	IPR041469	Subtilisin-like protease, fibronectin type-III domain
Fxa5Bg100854.1	8c278fae2343cd10db384ff6229cda06	2725	Pfam	PF17766	Fibronectin type-III domain	702	796	8.3e-23	2024-10-09	IPR041469	Subtilisin-like protease, fibronectin type-III domain
Fxa5Bg100854.1	8c278fae2343cd10db384ff6229cda06	2725	Pfam	PF17766	Fibronectin type-III domain	2619	2714	9.2e-27	2024-10-09	IPR041469	Subtilisin-like protease, fibronectin type-III domain
Fxa5Bg100854.1	8c278fae2343cd10db384ff6229cda06	2725	Phobius	NON_CYTOPLASMIC_DOMAIN	Region of a membrane-bound protein predicted to be outside the membrane, in the extracellular region.	1226	2725	-	2024-10-09	-	-
Fxa5Bg100854.1	8c278fae2343cd10db384ff6229cda06	2725	Phobius	CYTOPLASMIC_DOMAIN	Region of a membrane-bound protein predicted to be outside the membrane, in the cytoplasm.	930	949	-	2024-10-09	-	-
Fxa5Bg100854.1	8c278fae2343cd10db384ff6229cda06	2725	Pfam	PF00082	Subtilase family	2098	2540	2.5e-37	2024-10-09	IPR000209	Peptidase S8/S53 domain
Fxa5Bg100854.1	8c278fae2343cd10db384ff6229cda06	2725	Phobius	NON_CYTOPLASMIC_DOMAIN	Region of a membrane-bound protein predicted to be outside the membrane, in the extracellular region.	844	854	-	2024-10-09	-	-
Fxa5Bg100854.1	8c278fae2343cd10db384ff6229cda06	2725	Phobius	NON_CYTOPLASMIC_DOMAIN	Region of a membrane-bound protein predicted to be outside the membrane, in the extracellular region.	906	910	-	2024-10-09	-	-
Fxa5Bg100854.1	8c278fae2343cd10db384ff6229cda06	2725	Phobius	TRANSMEMBRANE	Region of a membrane-bound protein predicted to be embedded in the membrane.	1128	1147	-	2024-10-09	-	-
Fxa5Bg100854.1	8c278fae2343cd10db384ff6229cda06	2725	Pfam	PF00082	Subtilase family	1338	1795	3.1e-37	2024-10-09	IPR000209	Peptidase S8/S53 domain
Fxa5Bg100854.1	8c278fae2343cd10db384ff6229cda06	2725	Phobius	CYTOPLASMIC_DOMAIN	Region of a membrane-bound protein predicted to be outside the membrane, in the cytoplasm.	1178	1205	-	2024-10-09	-	-
Fxa5Bg100854.1	8c278fae2343cd10db384ff6229cda06	2725	Pfam	PF05922	Peptidase inhibitor I9	1234	1312	7.3e-15	2024-10-09	IPR010259	Peptidase S8 propeptide/proteinase inhibitor I9
Fxa5Bg100854.1	8c278fae2343cd10db384ff6229cda06	2725	Pfam	PF05922	Peptidase inhibitor I9	1995	2074	7e-16	2024-10-09	IPR010259	Peptidase S8 propeptide/proteinase inhibitor I9
Fxa5Bg100854.1	8c278fae2343cd10db384ff6229cda06	2725	Pfam	PF05922	Peptidase inhibitor I9	68	146	4.5e-12	2024-10-09	IPR010259	Peptidase S8 propeptide/proteinase inhibitor I9
Fxa5Bg100854.1	8c278fae2343cd10db384ff6229cda06	2725	Pfam	PF00082	Subtilase family	173	623	1.8e-41	2024-10-09	IPR000209	Peptidase S8/S53 domain
Fxa5Bg100854.1	8c278fae2343cd10db384ff6229cda06	2725	Phobius	TRANSMEMBRANE	Region of a membrane-bound protein predicted to be embedded in the membrane.	1065	1084	-	2024-10-09	-	-
Fxa5Bg100854.1	8c278fae2343cd10db384ff6229cda06	2725	Phobius	TRANSMEMBRANE	Region of a membrane-bound protein predicted to be embedded in the membrane.	911	929	-	2024-10-09	-	-
Fxa5Bg100854.1	8c278fae2343cd10db384ff6229cda06	2725	Phobius	CYTOPLASMIC_DOMAIN	Region of a membrane-bound protein predicted to be outside the membrane, in the cytoplasm.	874	884	-	2024-10-09	-	-
Fxa5Bg100854.1	8c278fae2343cd10db384ff6229cda06	2725	Pfam	PF01733	Nucleoside transporter	923	1200	4.9e-25	2024-10-09	IPR002259	Equilibrative nucleoside transporter
Fxa5Bg100854.1	8c278fae2343cd10db384ff6229cda06	2725	Phobius	TRANSMEMBRANE	Region of a membrane-bound protein predicted to be embedded in the membrane.	984	1005	-	2024-10-09	-	-
Fxa5Bg100854.1	8c278fae2343cd10db384ff6229cda06	2725	Phobius	TRANSMEMBRANE	Region of a membrane-bound protein predicted to be embedded in the membrane.	855	873	-	2024-10-09	-	-
Fxa6Ag103445.1	882b911b128df8147443387876ff03ae	759	Phobius	SIGNAL_PEPTIDE_C_REGION	C-terminal region of a signal peptide.	15	19	-	2024-10-09	-	-
Fxa6Ag103445.1	882b911b128df8147443387876ff03ae	759	Pfam	PF02225	PA domain	355	443	5.2e-08	2024-10-09	IPR003137	PA domain
Fxa6Ag103445.1	882b911b128df8147443387876ff03ae	759	Pfam	PF17766	Fibronectin type-III domain	648	752	2.7e-25	2024-10-09	IPR041469	Subtilisin-like protease, fibronectin type-III domain
Fxa6Ag103445.1	882b911b128df8147443387876ff03ae	759	Pfam	PF05922	Peptidase inhibitor I9	23	100	3.3e-12	2024-10-09	IPR010259	Peptidase S8 propeptide/proteinase inhibitor I9
Fxa6Ag103445.1	882b911b128df8147443387876ff03ae	759	Phobius	SIGNAL_PEPTIDE	Signal peptide region	1	19	-	2024-10-09	-	-
Fxa6Ag103445.1	882b911b128df8147443387876ff03ae	759	Phobius	SIGNAL_PEPTIDE_N_REGION	N-terminal region of a signal peptide.	1	2	-	2024-10-09	-	-
Fxa6Ag103445.1	882b911b128df8147443387876ff03ae	759	Pfam	PF00082	Subtilase family	125	581	6e-44	2024-10-09	IPR000209	Peptidase S8/S53 domain
Fxa6Ag103445.1	882b911b128df8147443387876ff03ae	759	Phobius	SIGNAL_PEPTIDE_H_REGION	Hydrophobic region of a signal peptide.	3	14	-	2024-10-09	-	-
Fxa6Ag103445.1	882b911b128df8147443387876ff03ae	759	Phobius	NON_CYTOPLASMIC_DOMAIN	Region of a membrane-bound protein predicted to be outside the membrane, in the extracellular region.	20	759	-	2024-10-09	-	-
Fxa1Ag100889.1	edf6f89aff3f72c2ddb0f06d130f9ab8	886	Phobius	SIGNAL_PEPTIDE_C_REGION	C-terminal region of a signal peptide.	27	31	-	2024-10-09	-	-
Fxa1Ag100889.1	edf6f89aff3f72c2ddb0f06d130f9ab8	886	Phobius	NON_CYTOPLASMIC_DOMAIN	Region of a membrane-bound protein predicted to be outside the membrane, in the extracellular region.	32	886	-	2024-10-09	-	-
Fxa1Ag100889.1	edf6f89aff3f72c2ddb0f06d130f9ab8	886	Phobius	SIGNAL_PEPTIDE	Signal peptide region	1	31	-	2024-10-09	-	-
Fxa1Ag100889.1	edf6f89aff3f72c2ddb0f06d130f9ab8	886	Phobius	SIGNAL_PEPTIDE_N_REGION	N-terminal region of a signal peptide.	1	14	-	2024-10-09	-	-
Fxa1Ag100889.1	edf6f89aff3f72c2ddb0f06d130f9ab8	886	Pfam	PF00082	Subtilase family	264	713	7.4e-42	2024-10-09	IPR000209	Peptidase S8/S53 domain
Fxa1Ag100889.1	edf6f89aff3f72c2ddb0f06d130f9ab8	886	Pfam	PF05922	Peptidase inhibitor I9	156	236	2.2e-16	2024-10-09	IPR010259	Peptidase S8 propeptide/proteinase inhibitor I9
Fxa1Ag100889.1	edf6f89aff3f72c2ddb0f06d130f9ab8	886	Phobius	SIGNAL_PEPTIDE_H_REGION	Hydrophobic region of a signal peptide.	15	26	-	2024-10-09	-	-
Fxa1Ag100889.1	edf6f89aff3f72c2ddb0f06d130f9ab8	886	Pfam	PF17766	Fibronectin type-III domain	781	875	1.2e-26	2024-10-09	IPR041469	Subtilisin-like protease, fibronectin type-III domain
Fxa3Bg200132.1	06523d08f895a9519f22c837b589b49e	1096	Phobius	NON_CYTOPLASMIC_DOMAIN	Region of a membrane-bound protein predicted to be outside the membrane, in the extracellular region.	1	220	-	2024-10-09	-	-
Fxa3Bg200132.1	06523d08f895a9519f22c837b589b49e	1096	Phobius	NON_CYTOPLASMIC_DOMAIN	Region of a membrane-bound protein predicted to be outside the membrane, in the extracellular region.	307	1096	-	2024-10-09	-	-
Fxa3Bg200132.1	06523d08f895a9519f22c837b589b49e	1096	Pfam	PF01426	BAH domain	23	134	1.5e-19	2024-10-09	IPR001025	Bromo adjacent homology (BAH) domain
Fxa3Bg200132.1	06523d08f895a9519f22c837b589b49e	1096	Phobius	CYTOPLASMIC_DOMAIN	Region of a membrane-bound protein predicted to be outside the membrane, in the cytoplasm.	238	284	-	2024-10-09	-	-
Fxa3Bg200132.1	06523d08f895a9519f22c837b589b49e	1096	Pfam	PF00082	Subtilase family	431	920	1.2e-37	2024-10-09	IPR000209	Peptidase S8/S53 domain
Fxa3Bg200132.1	06523d08f895a9519f22c837b589b49e	1096	Phobius	TRANSMEMBRANE	Region of a membrane-bound protein predicted to be embedded in the membrane.	285	306	-	2024-10-09	-	-
Fxa3Bg200132.1	06523d08f895a9519f22c837b589b49e	1096	Pfam	PF17766	Fibronectin type-III domain	997	1091	1.9e-12	2024-10-09	IPR041469	Subtilisin-like protease, fibronectin type-III domain
Fxa3Bg200132.1	06523d08f895a9519f22c837b589b49e	1096	Pfam	PF00628	PHD-finger	141	186	0.00024	2024-10-09	IPR019787	Zinc finger, PHD-finger
Fxa3Bg200132.1	06523d08f895a9519f22c837b589b49e	1096	Pfam	PF05922	Peptidase inhibitor I9	344	405	1.6e-08	2024-10-09	IPR010259	Peptidase S8 propeptide/proteinase inhibitor I9
Fxa3Bg200132.1	06523d08f895a9519f22c837b589b49e	1096	Phobius	TRANSMEMBRANE	Region of a membrane-bound protein predicted to be embedded in the membrane.	221	237	-	2024-10-09	-	-
Fxa3Bg203591.1	dce4905d5802213a9ff11c979e728217	1519	Pfam	PF00082	Subtilase family	935	1322	3.5e-34	2024-10-09	IPR000209	Peptidase S8/S53 domain
Fxa3Bg203591.1	dce4905d5802213a9ff11c979e728217	1519	Pfam	PF00082	Subtilase family	131	615	3.9e-35	2024-10-09	IPR000209	Peptidase S8/S53 domain
Fxa3Bg203591.1	dce4905d5802213a9ff11c979e728217	1519	Pfam	PF17766	Fibronectin type-III domain	668	763	7.3e-27	2024-10-09	IPR041469	Subtilisin-like protease, fibronectin type-III domain
Fxa3Bg203591.1	dce4905d5802213a9ff11c979e728217	1519	Pfam	PF17766	Fibronectin type-III domain	1397	1494	1.5e-20	2024-10-09	IPR041469	Subtilisin-like protease, fibronectin type-III domain
Fxa3Bg203591.1	dce4905d5802213a9ff11c979e728217	1519	Pfam	PF05922	Peptidase inhibitor I9	765	844	1.3e-09	2024-10-09	IPR010259	Peptidase S8 propeptide/proteinase inhibitor I9
Fxa3Bg203591.1	dce4905d5802213a9ff11c979e728217	1519	Pfam	PF05922	Peptidase inhibitor I9	54	102	1.3e-08	2024-10-09	IPR010259	Peptidase S8 propeptide/proteinase inhibitor I9
Fxa3Bg203591.1	dce4905d5802213a9ff11c979e728217	1519	Pfam	PF02225	PA domain	397	471	2.2e-10	2024-10-09	IPR003137	PA domain
Fxa3Bg203591.1	dce4905d5802213a9ff11c979e728217	1519	Pfam	PF02225	PA domain	1106	1197	9.7e-07	2024-10-09	IPR003137	PA domain
Fxa3Dg203381.1	b33f06a06247251b9e734aec8592c21b	1337	Pfam	PF05922	Peptidase inhibitor I9	17	102	1.8e-14	2024-10-09	IPR010259	Peptidase S8 propeptide/proteinase inhibitor I9
Fxa3Dg203381.1	b33f06a06247251b9e734aec8592c21b	1337	Pfam	PF05922	Peptidase inhibitor I9	722	792	7.3e-09	2024-10-09	IPR010259	Peptidase S8 propeptide/proteinase inhibitor I9
Fxa3Dg203381.1	b33f06a06247251b9e734aec8592c21b	1337	Pfam	PF00082	Subtilase family	131	570	7.3e-26	2024-10-09	IPR000209	Peptidase S8/S53 domain
Fxa3Dg203381.1	b33f06a06247251b9e734aec8592c21b	1337	Pfam	PF00082	Subtilase family	824	1277	1.6e-29	2024-10-09	IPR000209	Peptidase S8/S53 domain
Fxa3Dg203381.1	b33f06a06247251b9e734aec8592c21b	1337	Pfam	PF02225	PA domain	352	426	2.4e-10	2024-10-09	IPR003137	PA domain
Fxa3Dg203381.1	b33f06a06247251b9e734aec8592c21b	1337	Pfam	PF02225	PA domain	1077	1152	4.1e-06	2024-10-09	IPR003137	PA domain
Fxa3Dg203381.1	b33f06a06247251b9e734aec8592c21b	1337	Pfam	PF17766	Fibronectin type-III domain	623	712	8.5e-23	2024-10-09	IPR041469	Subtilisin-like protease, fibronectin type-III domain
Fxa3Ag103935.1	688bcc7039ee55c82dae65d228a4b143	1501	Pfam	PF02225	PA domain	382	456	2.1e-10	2024-10-09	IPR003137	PA domain
Fxa3Ag103935.1	688bcc7039ee55c82dae65d228a4b143	1501	Pfam	PF02225	PA domain	1121	1201	1.1e-05	2024-10-09	IPR003137	PA domain
Fxa3Ag103935.1	688bcc7039ee55c82dae65d228a4b143	1501	Pfam	PF05922	Peptidase inhibitor I9	1	86	1.1e-14	2024-10-09	IPR010259	Peptidase S8 propeptide/proteinase inhibitor I9
Fxa3Ag103935.1	688bcc7039ee55c82dae65d228a4b143	1501	Pfam	PF05922	Peptidase inhibitor I9	758	837	1.5e-09	2024-10-09	IPR010259	Peptidase S8 propeptide/proteinase inhibitor I9
Fxa3Ag103935.1	688bcc7039ee55c82dae65d228a4b143	1501	Pfam	PF00082	Subtilase family	193	600	5.1e-34	2024-10-09	IPR000209	Peptidase S8/S53 domain
Fxa3Ag103935.1	688bcc7039ee55c82dae65d228a4b143	1501	Pfam	PF00082	Subtilase family	870	1326	2.5e-36	2024-10-09	IPR000209	Peptidase S8/S53 domain
Fxa3Ag103935.1	688bcc7039ee55c82dae65d228a4b143	1501	Pfam	PF17766	Fibronectin type-III domain	653	748	1e-25	2024-10-09	IPR041469	Subtilisin-like protease, fibronectin type-III domain
Fxa3Ag103935.1	688bcc7039ee55c82dae65d228a4b143	1501	Pfam	PF17766	Fibronectin type-III domain	1401	1498	4.5e-21	2024-10-09	IPR041469	Subtilisin-like protease, fibronectin type-III domain
Fxa1Dg201980.1	a0d9e0f083739c98d0d36dfa0728d268	731	Phobius	SIGNAL_PEPTIDE_C_REGION	C-terminal region of a signal peptide.	15	22	-	2024-10-09	-	-
Fxa1Dg201980.1	a0d9e0f083739c98d0d36dfa0728d268	731	Pfam	PF05922	Peptidase inhibitor I9	24	99	2.5e-10	2024-10-09	IPR010259	Peptidase S8 propeptide/proteinase inhibitor I9
Fxa1Dg201980.1	a0d9e0f083739c98d0d36dfa0728d268	731	Pfam	PF00082	Subtilase family	183	551	1.3e-34	2024-10-09	IPR000209	Peptidase S8/S53 domain
Fxa1Dg201980.1	a0d9e0f083739c98d0d36dfa0728d268	731	Pfam	PF17766	Fibronectin type-III domain	621	727	7.2e-20	2024-10-09	IPR041469	Subtilisin-like protease, fibronectin type-III domain
Fxa1Dg201980.1	a0d9e0f083739c98d0d36dfa0728d268	731	Phobius	SIGNAL_PEPTIDE_N_REGION	N-terminal region of a signal peptide.	1	2	-	2024-10-09	-	-
Fxa1Dg201980.1	a0d9e0f083739c98d0d36dfa0728d268	731	Phobius	NON_CYTOPLASMIC_DOMAIN	Region of a membrane-bound protein predicted to be outside the membrane, in the extracellular region.	23	731	-	2024-10-09	-	-
Fxa1Dg201980.1	a0d9e0f083739c98d0d36dfa0728d268	731	Phobius	SIGNAL_PEPTIDE_H_REGION	Hydrophobic region of a signal peptide.	3	14	-	2024-10-09	-	-
Fxa1Dg201980.1	a0d9e0f083739c98d0d36dfa0728d268	731	Phobius	SIGNAL_PEPTIDE	Signal peptide region	1	22	-	2024-10-09	-	-
Fxa2Ag103348.1	29705e22f4d3389b439206e10accbc88	96	Pfam	PF17766	Fibronectin type-III domain	6	92	1.2e-17	2024-10-09	IPR041469	Subtilisin-like protease, fibronectin type-III domain
Fxa3Ag103474.1	d263b2e69e10f573283eaf4c5b06b78c	1399	Pfam	PF00082	Subtilase family	171	588	1.6e-23	2024-10-09	IPR000209	Peptidase S8/S53 domain
Fxa3Ag103474.1	d263b2e69e10f573283eaf4c5b06b78c	1399	Pfam	PF00082	Subtilase family	823	1265	5.7e-38	2024-10-09	IPR000209	Peptidase S8/S53 domain
Fxa3Ag103474.1	d263b2e69e10f573283eaf4c5b06b78c	1399	Phobius	TRANSMEMBRANE	Region of a membrane-bound protein predicted to be embedded in the membrane.	70	87	-	2024-10-09	-	-
Fxa3Ag103474.1	d263b2e69e10f573283eaf4c5b06b78c	1399	Phobius	NON_CYTOPLASMIC_DOMAIN	Region of a membrane-bound protein predicted to be outside the membrane, in the extracellular region.	1	43	-	2024-10-09	-	-
Fxa3Ag103474.1	d263b2e69e10f573283eaf4c5b06b78c	1399	Phobius	TRANSMEMBRANE	Region of a membrane-bound protein predicted to be embedded in the membrane.	44	63	-	2024-10-09	-	-
Fxa3Ag103474.1	d263b2e69e10f573283eaf4c5b06b78c	1399	Pfam	PF17766	Fibronectin type-III domain	1320	1392	2.5e-12	2024-10-09	IPR041469	Subtilisin-like protease, fibronectin type-III domain
Fxa3Ag103474.1	d263b2e69e10f573283eaf4c5b06b78c	1399	Pfam	PF17766	Fibronectin type-III domain	644	715	1.9e-05	2024-10-09	IPR041469	Subtilisin-like protease, fibronectin type-III domain
Fxa3Ag103474.1	d263b2e69e10f573283eaf4c5b06b78c	1399	Phobius	NON_CYTOPLASMIC_DOMAIN	Region of a membrane-bound protein predicted to be outside the membrane, in the extracellular region.	88	1399	-	2024-10-09	-	-
Fxa3Ag103474.1	d263b2e69e10f573283eaf4c5b06b78c	1399	Pfam	PF05922	Peptidase inhibitor I9	70	148	1.8e-13	2024-10-09	IPR010259	Peptidase S8 propeptide/proteinase inhibitor I9
Fxa3Ag103474.1	d263b2e69e10f573283eaf4c5b06b78c	1399	Pfam	PF05922	Peptidase inhibitor I9	723	801	3.4e-11	2024-10-09	IPR010259	Peptidase S8 propeptide/proteinase inhibitor I9
Fxa3Ag103474.1	d263b2e69e10f573283eaf4c5b06b78c	1399	Phobius	CYTOPLASMIC_DOMAIN	Region of a membrane-bound protein predicted to be outside the membrane, in the cytoplasm.	64	69	-	2024-10-09	-	-
Fxa6Bg100093.1	6cd073b5e753fda73538980ad7223f96	709	Phobius	SIGNAL_PEPTIDE_C_REGION	C-terminal region of a signal peptide.	24	30	-	2024-10-09	-	-
Fxa6Bg100093.1	6cd073b5e753fda73538980ad7223f96	709	Pfam	PF00082	Subtilase family	141	575	3e-41	2024-10-09	IPR000209	Peptidase S8/S53 domain
Fxa6Bg100093.1	6cd073b5e753fda73538980ad7223f96	709	Phobius	SIGNAL_PEPTIDE_H_REGION	Hydrophobic region of a signal peptide.	12	23	-	2024-10-09	-	-
Fxa6Bg100093.1	6cd073b5e753fda73538980ad7223f96	709	Phobius	SIGNAL_PEPTIDE	Signal peptide region	1	30	-	2024-10-09	-	-
Fxa6Bg100093.1	6cd073b5e753fda73538980ad7223f96	709	Pfam	PF17766	Fibronectin type-III domain	645	708	1.6e-09	2024-10-09	IPR041469	Subtilisin-like protease, fibronectin type-III domain
Fxa6Bg100093.1	6cd073b5e753fda73538980ad7223f96	709	Pfam	PF05922	Peptidase inhibitor I9	34	117	1.3e-14	2024-10-09	IPR010259	Peptidase S8 propeptide/proteinase inhibitor I9
Fxa6Bg100093.1	6cd073b5e753fda73538980ad7223f96	709	Phobius	SIGNAL_PEPTIDE_N_REGION	N-terminal region of a signal peptide.	1	11	-	2024-10-09	-	-
Fxa6Bg100093.1	6cd073b5e753fda73538980ad7223f96	709	Phobius	NON_CYTOPLASMIC_DOMAIN	Region of a membrane-bound protein predicted to be outside the membrane, in the extracellular region.	31	709	-	2024-10-09	-	-
Fxa7Cg102185.1	12550850b8e88cffa9b3ed06c37a0933	174	Pfam	PF17766	Fibronectin type-III domain	73	170	3.7e-22	2024-10-09	IPR041469	Subtilisin-like protease, fibronectin type-III domain
Fxa7Ag200320.1	71a63e822ab28086bade924b4e11e5bb	1433	Pfam	PF00082	Subtilase family	832	1261	1.4e-38	2024-10-09	IPR000209	Peptidase S8/S53 domain
Fxa7Ag200320.1	71a63e822ab28086bade924b4e11e5bb	1433	Pfam	PF17766	Fibronectin type-III domain	1328	1429	1.4e-20	2024-10-09	IPR041469	Subtilisin-like protease, fibronectin type-III domain
Fxa7Ag200320.1	71a63e822ab28086bade924b4e11e5bb	1433	Pfam	PF17766	Fibronectin type-III domain	630	724	3.1e-13	2024-10-09	IPR041469	Subtilisin-like protease, fibronectin type-III domain
Fxa7Ag200320.1	71a63e822ab28086bade924b4e11e5bb	1433	Phobius	CYTOPLASMIC_DOMAIN	Region of a membrane-bound protein predicted to be outside the membrane, in the cytoplasm.	1	6	-	2024-10-09	-	-
Fxa7Ag200320.1	71a63e822ab28086bade924b4e11e5bb	1433	Phobius	NON_CYTOPLASMIC_DOMAIN	Region of a membrane-bound protein predicted to be outside the membrane, in the extracellular region.	30	1433	-	2024-10-09	-	-
Fxa7Ag200320.1	71a63e822ab28086bade924b4e11e5bb	1433	Phobius	TRANSMEMBRANE	Region of a membrane-bound protein predicted to be embedded in the membrane.	7	29	-	2024-10-09	-	-
Fxa7Ag200320.1	71a63e822ab28086bade924b4e11e5bb	1433	Pfam	PF00082	Subtilase family	135	566	2e-36	2024-10-09	IPR000209	Peptidase S8/S53 domain
Fxa7Ag200320.1	71a63e822ab28086bade924b4e11e5bb	1433	Pfam	PF05922	Peptidase inhibitor I9	35	113	1.9e-13	2024-10-09	IPR010259	Peptidase S8 propeptide/proteinase inhibitor I9
Fxa7Ag200320.1	71a63e822ab28086bade924b4e11e5bb	1433	Pfam	PF05922	Peptidase inhibitor I9	732	808	9.5e-09	2024-10-09	IPR010259	Peptidase S8 propeptide/proteinase inhibitor I9
Fxa7Ag200484.1	9ea75555c108693b947a29ef0497d4a8	770	MobiDBLite	mobidb-lite	consensus disorder prediction	203	225	-	2024-10-09	-	-
Fxa7Ag200484.1	9ea75555c108693b947a29ef0497d4a8	770	Phobius	SIGNAL_PEPTIDE_H_REGION	Hydrophobic region of a signal peptide.	4	14	-	2024-10-09	-	-
Fxa7Ag200484.1	9ea75555c108693b947a29ef0497d4a8	770	Phobius	SIGNAL_PEPTIDE_N_REGION	N-terminal region of a signal peptide.	1	3	-	2024-10-09	-	-
Fxa7Ag200484.1	9ea75555c108693b947a29ef0497d4a8	770	Phobius	SIGNAL_PEPTIDE_C_REGION	C-terminal region of a signal peptide.	15	19	-	2024-10-09	-	-
Fxa7Ag200484.1	9ea75555c108693b947a29ef0497d4a8	770	Pfam	PF05922	Peptidase inhibitor I9	26	108	3.5e-12	2024-10-09	IPR010259	Peptidase S8 propeptide/proteinase inhibitor I9
Fxa7Ag200484.1	9ea75555c108693b947a29ef0497d4a8	770	Pfam	PF00082	Subtilase family	137	600	6.3e-40	2024-10-09	IPR000209	Peptidase S8/S53 domain
Fxa7Ag200484.1	9ea75555c108693b947a29ef0497d4a8	770	Phobius	SIGNAL_PEPTIDE	Signal peptide region	1	19	-	2024-10-09	-	-
Fxa7Ag200484.1	9ea75555c108693b947a29ef0497d4a8	770	MobiDBLite	mobidb-lite	consensus disorder prediction	204	225	-	2024-10-09	-	-
Fxa7Ag200484.1	9ea75555c108693b947a29ef0497d4a8	770	Pfam	PF17766	Fibronectin type-III domain	670	765	9.2e-19	2024-10-09	IPR041469	Subtilisin-like protease, fibronectin type-III domain
Fxa7Ag200484.1	9ea75555c108693b947a29ef0497d4a8	770	Pfam	PF02225	PA domain	378	469	0.043	2024-10-09	IPR003137	PA domain
Fxa7Ag200484.1	9ea75555c108693b947a29ef0497d4a8	770	Phobius	NON_CYTOPLASMIC_DOMAIN	Region of a membrane-bound protein predicted to be outside the membrane, in the extracellular region.	20	770	-	2024-10-09	-	-
Fxa3Dg202763.1	51b6c762a1b5544c45b79c0282845b96	166	Phobius	NON_CYTOPLASMIC_DOMAIN	Region of a membrane-bound protein predicted to be outside the membrane, in the extracellular region.	21	166	-	2024-10-09	-	-
Fxa3Dg202763.1	51b6c762a1b5544c45b79c0282845b96	166	Phobius	SIGNAL_PEPTIDE	Signal peptide region	1	20	-	2024-10-09	-	-
Fxa3Dg202763.1	51b6c762a1b5544c45b79c0282845b96	166	Pfam	PF05922	Peptidase inhibitor I9	30	91	1.4e-08	2024-10-09	IPR010259	Peptidase S8 propeptide/proteinase inhibitor I9
Fxa3Dg202763.1	51b6c762a1b5544c45b79c0282845b96	166	Phobius	SIGNAL_PEPTIDE_C_REGION	C-terminal region of a signal peptide.	13	20	-	2024-10-09	-	-
Fxa3Dg202763.1	51b6c762a1b5544c45b79c0282845b96	166	Phobius	SIGNAL_PEPTIDE_N_REGION	N-terminal region of a signal peptide.	1	3	-	2024-10-09	-	-
Fxa3Dg202763.1	51b6c762a1b5544c45b79c0282845b96	166	Phobius	SIGNAL_PEPTIDE_H_REGION	Hydrophobic region of a signal peptide.	4	12	-	2024-10-09	-	-
Fxa7Bg202671.1	46775438ddc3879cda12f252d9584de1	776	Pfam	PF00082	Subtilase family	146	599	2.1e-46	2024-10-09	IPR000209	Peptidase S8/S53 domain
Fxa7Bg202671.1	46775438ddc3879cda12f252d9584de1	776	Pfam	PF05922	Peptidase inhibitor I9	32	118	2.2e-17	2024-10-09	IPR010259	Peptidase S8 propeptide/proteinase inhibitor I9
Fxa7Bg202671.1	46775438ddc3879cda12f252d9584de1	776	Phobius	SIGNAL_PEPTIDE_C_REGION	C-terminal region of a signal peptide.	23	27	-	2024-10-09	-	-
Fxa7Bg202671.1	46775438ddc3879cda12f252d9584de1	776	Phobius	NON_CYTOPLASMIC_DOMAIN	Region of a membrane-bound protein predicted to be outside the membrane, in the extracellular region.	28	776	-	2024-10-09	-	-
Fxa7Bg202671.1	46775438ddc3879cda12f252d9584de1	776	Pfam	PF17766	Fibronectin type-III domain	672	770	5e-25	2024-10-09	IPR041469	Subtilisin-like protease, fibronectin type-III domain
Fxa7Bg202671.1	46775438ddc3879cda12f252d9584de1	776	Phobius	SIGNAL_PEPTIDE_H_REGION	Hydrophobic region of a signal peptide.	10	22	-	2024-10-09	-	-
Fxa7Bg202671.1	46775438ddc3879cda12f252d9584de1	776	Phobius	SIGNAL_PEPTIDE_N_REGION	N-terminal region of a signal peptide.	1	9	-	2024-10-09	-	-
Fxa7Bg202671.1	46775438ddc3879cda12f252d9584de1	776	Phobius	SIGNAL_PEPTIDE	Signal peptide region	1	27	-	2024-10-09	-	-
Fxa7Bg202671.1	46775438ddc3879cda12f252d9584de1	776	Pfam	PF02225	PA domain	386	475	2.2e-08	2024-10-09	IPR003137	PA domain
Fxa3Dg200015.1	8de3ca613557f09d827b0175f51901b4	615	Pfam	PF02225	PA domain	247	320	6.5e-09	2024-10-09	IPR003137	PA domain
Fxa3Dg200015.1	8de3ca613557f09d827b0175f51901b4	615	Pfam	PF17766	Fibronectin type-III domain	510	607	8.9e-27	2024-10-09	IPR041469	Subtilisin-like protease, fibronectin type-III domain
Fxa3Dg200015.1	8de3ca613557f09d827b0175f51901b4	615	Pfam	PF00082	Subtilase family	48	437	2.1e-32	2024-10-09	IPR000209	Peptidase S8/S53 domain
Fxa1Ag100794.1	a32946e9604b69987f3858bde2701047	765	Phobius	SIGNAL_PEPTIDE_N_REGION	N-terminal region of a signal peptide.	1	7	-	2024-10-09	-	-
Fxa1Ag100794.1	a32946e9604b69987f3858bde2701047	765	Phobius	SIGNAL_PEPTIDE_C_REGION	C-terminal region of a signal peptide.	21	24	-	2024-10-09	-	-
Fxa1Ag100794.1	a32946e9604b69987f3858bde2701047	765	Pfam	PF02225	PA domain	390	462	2.2e-08	2024-10-09	IPR003137	PA domain
Fxa1Ag100794.1	a32946e9604b69987f3858bde2701047	765	Pfam	PF00082	Subtilase family	137	585	5.8e-42	2024-10-09	IPR000209	Peptidase S8/S53 domain
Fxa1Ag100794.1	a32946e9604b69987f3858bde2701047	765	Phobius	SIGNAL_PEPTIDE	Signal peptide region	1	24	-	2024-10-09	-	-
Fxa1Ag100794.1	a32946e9604b69987f3858bde2701047	765	MobiDBLite	mobidb-lite	consensus disorder prediction	203	226	-	2024-10-09	-	-
Fxa1Ag100794.1	a32946e9604b69987f3858bde2701047	765	Pfam	PF17766	Fibronectin type-III domain	662	759	6.3e-21	2024-10-09	IPR041469	Subtilisin-like protease, fibronectin type-III domain
Fxa1Ag100794.1	a32946e9604b69987f3858bde2701047	765	Phobius	NON_CYTOPLASMIC_DOMAIN	Region of a membrane-bound protein predicted to be outside the membrane, in the extracellular region.	25	765	-	2024-10-09	-	-
Fxa1Ag100794.1	a32946e9604b69987f3858bde2701047	765	Phobius	SIGNAL_PEPTIDE_H_REGION	Hydrophobic region of a signal peptide.	8	20	-	2024-10-09	-	-
Fxa1Ag100794.1	a32946e9604b69987f3858bde2701047	765	Pfam	PF05922	Peptidase inhibitor I9	27	107	1.7e-17	2024-10-09	IPR010259	Peptidase S8 propeptide/proteinase inhibitor I9
Fxa3Cg100958.1	c3ebb1fcbbd183c7b2cf528800f611bf	845	Phobius	SIGNAL_PEPTIDE	Signal peptide region	1	23	-	2024-10-09	-	-
Fxa3Cg100958.1	c3ebb1fcbbd183c7b2cf528800f611bf	845	Phobius	NON_CYTOPLASMIC_DOMAIN	Region of a membrane-bound protein predicted to be outside the membrane, in the extracellular region.	24	845	-	2024-10-09	-	-
Fxa3Cg100958.1	c3ebb1fcbbd183c7b2cf528800f611bf	845	Phobius	SIGNAL_PEPTIDE_N_REGION	N-terminal region of a signal peptide.	1	8	-	2024-10-09	-	-
Fxa3Cg100958.1	c3ebb1fcbbd183c7b2cf528800f611bf	845	Phobius	SIGNAL_PEPTIDE_C_REGION	C-terminal region of a signal peptide.	20	23	-	2024-10-09	-	-
Fxa3Cg100958.1	c3ebb1fcbbd183c7b2cf528800f611bf	845	Phobius	SIGNAL_PEPTIDE_H_REGION	Hydrophobic region of a signal peptide.	9	19	-	2024-10-09	-	-
Fxa3Cg100958.1	c3ebb1fcbbd183c7b2cf528800f611bf	845	Pfam	PF17766	Fibronectin type-III domain	740	833	1.5e-11	2024-10-09	IPR041469	Subtilisin-like protease, fibronectin type-III domain
Fxa3Cg100958.1	c3ebb1fcbbd183c7b2cf528800f611bf	845	Pfam	PF00082	Subtilase family	172	666	1.5e-37	2024-10-09	IPR000209	Peptidase S8/S53 domain
Fxa3Cg100958.1	c3ebb1fcbbd183c7b2cf528800f611bf	845	Pfam	PF05922	Peptidase inhibitor I9	35	146	3.2e-09	2024-10-09	IPR010259	Peptidase S8 propeptide/proteinase inhibitor I9
Fxa2Bg200089.1	eea09244206a6be649d04127499ab001	769	Phobius	NON_CYTOPLASMIC_DOMAIN	Region of a membrane-bound protein predicted to be outside the membrane, in the extracellular region.	21	769	-	2024-10-09	-	-
Fxa2Bg200089.1	eea09244206a6be649d04127499ab001	769	Pfam	PF00082	Subtilase family	124	593	1.8e-41	2024-10-09	IPR000209	Peptidase S8/S53 domain
Fxa2Bg200089.1	eea09244206a6be649d04127499ab001	769	Phobius	SIGNAL_PEPTIDE_N_REGION	N-terminal region of a signal peptide.	1	3	-	2024-10-09	-	-
Fxa2Bg200089.1	eea09244206a6be649d04127499ab001	769	Phobius	SIGNAL_PEPTIDE_H_REGION	Hydrophobic region of a signal peptide.	4	15	-	2024-10-09	-	-
Fxa2Bg200089.1	eea09244206a6be649d04127499ab001	769	Phobius	SIGNAL_PEPTIDE	Signal peptide region	1	20	-	2024-10-09	-	-
Fxa2Bg200089.1	eea09244206a6be649d04127499ab001	769	Phobius	SIGNAL_PEPTIDE_C_REGION	C-terminal region of a signal peptide.	16	20	-	2024-10-09	-	-
Fxa2Bg200089.1	eea09244206a6be649d04127499ab001	769	Pfam	PF02225	PA domain	374	459	3.7e-09	2024-10-09	IPR003137	PA domain
Fxa2Bg200089.1	eea09244206a6be649d04127499ab001	769	Pfam	PF05922	Peptidase inhibitor I9	39	101	3e-08	2024-10-09	IPR010259	Peptidase S8 propeptide/proteinase inhibitor I9
Fxa2Bg200089.1	eea09244206a6be649d04127499ab001	769	Pfam	PF17766	Fibronectin type-III domain	659	763	9.7e-25	2024-10-09	IPR041469	Subtilisin-like protease, fibronectin type-III domain
Fxa2Bg200892.1	57f30a7e52d27e40022cd6428131737b	812	Pfam	PF05922	Peptidase inhibitor I9	31	110	1.5e-11	2024-10-09	IPR010259	Peptidase S8 propeptide/proteinase inhibitor I9
Fxa2Bg200892.1	57f30a7e52d27e40022cd6428131737b	812	Pfam	PF17766	Fibronectin type-III domain	688	753	3.7e-13	2024-10-09	IPR041469	Subtilisin-like protease, fibronectin type-III domain
Fxa2Bg200892.1	57f30a7e52d27e40022cd6428131737b	812	Phobius	SIGNAL_PEPTIDE_H_REGION	Hydrophobic region of a signal peptide.	6	17	-	2024-10-09	-	-
Fxa2Bg200892.1	57f30a7e52d27e40022cd6428131737b	812	Phobius	NON_CYTOPLASMIC_DOMAIN	Region of a membrane-bound protein predicted to be outside the membrane, in the extracellular region.	22	812	-	2024-10-09	-	-
Fxa2Bg200892.1	57f30a7e52d27e40022cd6428131737b	812	Pfam	PF00082	Subtilase family	136	611	1.2e-40	2024-10-09	IPR000209	Peptidase S8/S53 domain
Fxa2Bg200892.1	57f30a7e52d27e40022cd6428131737b	812	Phobius	SIGNAL_PEPTIDE	Signal peptide region	1	21	-	2024-10-09	-	-
Fxa2Bg200892.1	57f30a7e52d27e40022cd6428131737b	812	Phobius	SIGNAL_PEPTIDE_N_REGION	N-terminal region of a signal peptide.	1	5	-	2024-10-09	-	-
Fxa2Bg200892.1	57f30a7e52d27e40022cd6428131737b	812	Phobius	SIGNAL_PEPTIDE_C_REGION	C-terminal region of a signal peptide.	18	21	-	2024-10-09	-	-
Fxa3Bg203167.1	8b5c9dcac6aaff38b28de3994871bd00	701	Pfam	PF00082	Subtilase family	105	607	7.5e-38	2024-10-09	IPR000209	Peptidase S8/S53 domain
Fxa3Bg203167.1	8b5c9dcac6aaff38b28de3994871bd00	701	Pfam	PF05922	Peptidase inhibitor I9	5	83	2.5e-14	2024-10-09	IPR010259	Peptidase S8 propeptide/proteinase inhibitor I9
Fxa3Bg203167.1	8b5c9dcac6aaff38b28de3994871bd00	701	Phobius	NON_CYTOPLASMIC_DOMAIN	Region of a membrane-bound protein predicted to be outside the membrane, in the extracellular region.	21	701	-	2024-10-09	-	-
Fxa3Bg203167.1	8b5c9dcac6aaff38b28de3994871bd00	701	Phobius	SIGNAL_PEPTIDE	Signal peptide region	1	20	-	2024-10-09	-	-
Fxa3Bg203167.1	8b5c9dcac6aaff38b28de3994871bd00	701	Phobius	SIGNAL_PEPTIDE_H_REGION	Hydrophobic region of a signal peptide.	5	15	-	2024-10-09	-	-
Fxa3Bg203167.1	8b5c9dcac6aaff38b28de3994871bd00	701	Phobius	SIGNAL_PEPTIDE_N_REGION	N-terminal region of a signal peptide.	1	4	-	2024-10-09	-	-
Fxa3Bg203167.1	8b5c9dcac6aaff38b28de3994871bd00	701	Phobius	SIGNAL_PEPTIDE_C_REGION	C-terminal region of a signal peptide.	16	20	-	2024-10-09	-	-
Fxa7CgPR7_18	919af8112e0d399fa14b25f06ae82be8	71	Pfam	PF00082	Subtilase family	2	65	0.0004	2024-10-09	IPR000209	Peptidase S8/S53 domain
Fxa2Dg201787.1	cfcd0b1a93bea6b120efca1999e103a6	760	Phobius	SIGNAL_PEPTIDE_N_REGION	N-terminal region of a signal peptide.	1	7	-	2024-10-09	-	-
Fxa2Dg201787.1	cfcd0b1a93bea6b120efca1999e103a6	760	Phobius	NON_CYTOPLASMIC_DOMAIN	Region of a membrane-bound protein predicted to be outside the membrane, in the extracellular region.	23	760	-	2024-10-09	-	-
Fxa2Dg201787.1	cfcd0b1a93bea6b120efca1999e103a6	760	Phobius	SIGNAL_PEPTIDE_H_REGION	Hydrophobic region of a signal peptide.	8	18	-	2024-10-09	-	-
Fxa2Dg201787.1	cfcd0b1a93bea6b120efca1999e103a6	760	MobiDBLite	mobidb-lite	consensus disorder prediction	180	215	-	2024-10-09	-	-
Fxa2Dg201787.1	cfcd0b1a93bea6b120efca1999e103a6	760	Pfam	PF00082	Subtilase family	134	576	8.8e-45	2024-10-09	IPR000209	Peptidase S8/S53 domain
Fxa2Dg201787.1	cfcd0b1a93bea6b120efca1999e103a6	760	Pfam	PF05922	Peptidase inhibitor I9	27	109	5.6e-14	2024-10-09	IPR010259	Peptidase S8 propeptide/proteinase inhibitor I9
Fxa2Dg201787.1	cfcd0b1a93bea6b120efca1999e103a6	760	Pfam	PF17766	Fibronectin type-III domain	654	757	2.7e-21	2024-10-09	IPR041469	Subtilisin-like protease, fibronectin type-III domain
Fxa2Dg201787.1	cfcd0b1a93bea6b120efca1999e103a6	760	Pfam	PF02225	PA domain	369	450	1e-09	2024-10-09	IPR003137	PA domain
Fxa2Dg201787.1	cfcd0b1a93bea6b120efca1999e103a6	760	Phobius	SIGNAL_PEPTIDE_C_REGION	C-terminal region of a signal peptide.	19	22	-	2024-10-09	-	-
Fxa2Dg201787.1	cfcd0b1a93bea6b120efca1999e103a6	760	Phobius	SIGNAL_PEPTIDE	Signal peptide region	1	22	-	2024-10-09	-	-
Fxa1Bg202251.1	8c1cfb53699407a4368aea65c7513cbc	870	Pfam	PF05922	Peptidase inhibitor I9	24	99	6.7e-10	2024-10-09	IPR010259	Peptidase S8 propeptide/proteinase inhibitor I9
Fxa1Bg202251.1	8c1cfb53699407a4368aea65c7513cbc	870	Phobius	SIGNAL_PEPTIDE_C_REGION	C-terminal region of a signal peptide.	15	22	-	2024-10-09	-	-
Fxa1Bg202251.1	8c1cfb53699407a4368aea65c7513cbc	870	Phobius	SIGNAL_PEPTIDE_N_REGION	N-terminal region of a signal peptide.	1	2	-	2024-10-09	-	-
Fxa1Bg202251.1	8c1cfb53699407a4368aea65c7513cbc	870	Phobius	NON_CYTOPLASMIC_DOMAIN	Region of a membrane-bound protein predicted to be outside the membrane, in the extracellular region.	23	870	-	2024-10-09	-	-
Fxa1Bg202251.1	8c1cfb53699407a4368aea65c7513cbc	870	Pfam	PF17766	Fibronectin type-III domain	630	734	4.2e-21	2024-10-09	IPR041469	Subtilisin-like protease, fibronectin type-III domain
Fxa1Bg202251.1	8c1cfb53699407a4368aea65c7513cbc	870	Pfam	PF00082	Subtilase family	124	569	1.7e-43	2024-10-09	IPR000209	Peptidase S8/S53 domain
Fxa1Bg202251.1	8c1cfb53699407a4368aea65c7513cbc	870	Phobius	SIGNAL_PEPTIDE_H_REGION	Hydrophobic region of a signal peptide.	3	14	-	2024-10-09	-	-
Fxa1Bg202251.1	8c1cfb53699407a4368aea65c7513cbc	870	Phobius	SIGNAL_PEPTIDE	Signal peptide region	1	22	-	2024-10-09	-	-
Fxa2Cg202843.1	071c4466562a6906aefdd07b5046ef99	760	Phobius	SIGNAL_PEPTIDE_H_REGION	Hydrophobic region of a signal peptide.	8	18	-	2024-10-09	-	-
Fxa2Cg202843.1	071c4466562a6906aefdd07b5046ef99	760	Phobius	NON_CYTOPLASMIC_DOMAIN	Region of a membrane-bound protein predicted to be outside the membrane, in the extracellular region.	23	760	-	2024-10-09	-	-
Fxa2Cg202843.1	071c4466562a6906aefdd07b5046ef99	760	Phobius	SIGNAL_PEPTIDE_N_REGION	N-terminal region of a signal peptide.	1	7	-	2024-10-09	-	-
Fxa2Cg202843.1	071c4466562a6906aefdd07b5046ef99	760	MobiDBLite	mobidb-lite	consensus disorder prediction	180	215	-	2024-10-09	-	-
Fxa2Cg202843.1	071c4466562a6906aefdd07b5046ef99	760	Pfam	PF02225	PA domain	369	450	1e-09	2024-10-09	IPR003137	PA domain
Fxa2Cg202843.1	071c4466562a6906aefdd07b5046ef99	760	Pfam	PF05922	Peptidase inhibitor I9	27	109	6.7e-14	2024-10-09	IPR010259	Peptidase S8 propeptide/proteinase inhibitor I9
Fxa2Cg202843.1	071c4466562a6906aefdd07b5046ef99	760	Phobius	SIGNAL_PEPTIDE_C_REGION	C-terminal region of a signal peptide.	19	22	-	2024-10-09	-	-
Fxa2Cg202843.1	071c4466562a6906aefdd07b5046ef99	760	Pfam	PF17766	Fibronectin type-III domain	654	757	1.2e-21	2024-10-09	IPR041469	Subtilisin-like protease, fibronectin type-III domain
Fxa2Cg202843.1	071c4466562a6906aefdd07b5046ef99	760	Pfam	PF00082	Subtilase family	134	576	8.6e-45	2024-10-09	IPR000209	Peptidase S8/S53 domain
Fxa2Cg202843.1	071c4466562a6906aefdd07b5046ef99	760	Phobius	SIGNAL_PEPTIDE	Signal peptide region	1	22	-	2024-10-09	-	-
Fxa2Bg201914.1	7ea51f6e874a66e7dae37312449ef921	760	Phobius	SIGNAL_PEPTIDE_H_REGION	Hydrophobic region of a signal peptide.	8	18	-	2024-10-09	-	-
Fxa2Bg201914.1	7ea51f6e874a66e7dae37312449ef921	760	Phobius	SIGNAL_PEPTIDE_N_REGION	N-terminal region of a signal peptide.	1	7	-	2024-10-09	-	-
Fxa2Bg201914.1	7ea51f6e874a66e7dae37312449ef921	760	Phobius	NON_CYTOPLASMIC_DOMAIN	Region of a membrane-bound protein predicted to be outside the membrane, in the extracellular region.	23	760	-	2024-10-09	-	-
Fxa2Bg201914.1	7ea51f6e874a66e7dae37312449ef921	760	MobiDBLite	mobidb-lite	consensus disorder prediction	180	215	-	2024-10-09	-	-
Fxa2Bg201914.1	7ea51f6e874a66e7dae37312449ef921	760	Pfam	PF05922	Peptidase inhibitor I9	27	109	5.6e-14	2024-10-09	IPR010259	Peptidase S8 propeptide/proteinase inhibitor I9
Fxa2Bg201914.1	7ea51f6e874a66e7dae37312449ef921	760	Phobius	SIGNAL_PEPTIDE_C_REGION	C-terminal region of a signal peptide.	19	22	-	2024-10-09	-	-
Fxa2Bg201914.1	7ea51f6e874a66e7dae37312449ef921	760	Pfam	PF02225	PA domain	369	450	1e-09	2024-10-09	IPR003137	PA domain
Fxa2Bg201914.1	7ea51f6e874a66e7dae37312449ef921	760	Pfam	PF00082	Subtilase family	134	575	6.5e-45	2024-10-09	IPR000209	Peptidase S8/S53 domain
Fxa2Bg201914.1	7ea51f6e874a66e7dae37312449ef921	760	Phobius	SIGNAL_PEPTIDE	Signal peptide region	1	22	-	2024-10-09	-	-
Fxa2Bg201914.1	7ea51f6e874a66e7dae37312449ef921	760	Pfam	PF17766	Fibronectin type-III domain	654	757	1.4e-21	2024-10-09	IPR041469	Subtilisin-like protease, fibronectin type-III domain
Fxa2Cg200727.1	25c9ed2589f38e836b196810b30b4d6c	595	Pfam	PF17766	Fibronectin type-III domain	499	587	2.1e-19	2024-10-09	IPR041469	Subtilisin-like protease, fibronectin type-III domain
Fxa2Cg200727.1	25c9ed2589f38e836b196810b30b4d6c	595	Pfam	PF00082	Subtilase family	24	424	1e-39	2024-10-09	IPR000209	Peptidase S8/S53 domain
Fxa3Ag101814.1	aeb57721a8207df90975cdca657b53f3	147	Phobius	SIGNAL_PEPTIDE_H_REGION	Hydrophobic region of a signal peptide.	3	13	-	2024-10-09	-	-
Fxa3Ag101814.1	aeb57721a8207df90975cdca657b53f3	147	Phobius	SIGNAL_PEPTIDE	Signal peptide region	1	18	-	2024-10-09	-	-
Fxa3Ag101814.1	aeb57721a8207df90975cdca657b53f3	147	Phobius	SIGNAL_PEPTIDE_C_REGION	C-terminal region of a signal peptide.	14	18	-	2024-10-09	-	-
Fxa3Ag101814.1	aeb57721a8207df90975cdca657b53f3	147	Phobius	NON_CYTOPLASMIC_DOMAIN	Region of a membrane-bound protein predicted to be outside the membrane, in the extracellular region.	19	147	-	2024-10-09	-	-
Fxa3Ag101814.1	aeb57721a8207df90975cdca657b53f3	147	Phobius	SIGNAL_PEPTIDE_N_REGION	N-terminal region of a signal peptide.	1	2	-	2024-10-09	-	-
Fxa7Ag201316.1	fac0bcae74f9e07558bb53eb8f6a1255	1534	Pfam	PF00082	Subtilase family	135	585	4.2e-43	2024-10-09	IPR000209	Peptidase S8/S53 domain
Fxa7Ag201316.1	fac0bcae74f9e07558bb53eb8f6a1255	1534	Pfam	PF17766	Fibronectin type-III domain	643	741	2.4e-24	2024-10-09	IPR041469	Subtilisin-like protease, fibronectin type-III domain
Fxa7Ag201316.1	fac0bcae74f9e07558bb53eb8f6a1255	1534	Pfam	PF17766	Fibronectin type-III domain	1432	1531	2.2e-25	2024-10-09	IPR041469	Subtilisin-like protease, fibronectin type-III domain
Fxa7Ag201316.1	fac0bcae74f9e07558bb53eb8f6a1255	1534	Phobius	TRANSMEMBRANE	Region of a membrane-bound protein predicted to be embedded in the membrane.	765	783	-	2024-10-09	-	-
Fxa7Ag201316.1	fac0bcae74f9e07558bb53eb8f6a1255	1534	Phobius	SIGNAL_PEPTIDE	Signal peptide region	1	26	-	2024-10-09	-	-
Fxa7Ag201316.1	fac0bcae74f9e07558bb53eb8f6a1255	1534	Phobius	CYTOPLASMIC_DOMAIN	Region of a membrane-bound protein predicted to be outside the membrane, in the cytoplasm.	754	764	-	2024-10-09	-	-
Fxa7Ag201316.1	fac0bcae74f9e07558bb53eb8f6a1255	1534	Phobius	SIGNAL_PEPTIDE_H_REGION	Hydrophobic region of a signal peptide.	11	22	-	2024-10-09	-	-
Fxa7Ag201316.1	fac0bcae74f9e07558bb53eb8f6a1255	1534	Phobius	SIGNAL_PEPTIDE_N_REGION	N-terminal region of a signal peptide.	1	10	-	2024-10-09	-	-
Fxa7Ag201316.1	fac0bcae74f9e07558bb53eb8f6a1255	1534	Phobius	SIGNAL_PEPTIDE_C_REGION	C-terminal region of a signal peptide.	23	26	-	2024-10-09	-	-
Fxa7Ag201316.1	fac0bcae74f9e07558bb53eb8f6a1255	1534	Phobius	NON_CYTOPLASMIC_DOMAIN	Region of a membrane-bound protein predicted to be outside the membrane, in the extracellular region.	27	732	-	2024-10-09	-	-
Fxa7Ag201316.1	fac0bcae74f9e07558bb53eb8f6a1255	1534	Phobius	TRANSMEMBRANE	Region of a membrane-bound protein predicted to be embedded in the membrane.	733	753	-	2024-10-09	-	-
Fxa7Ag201316.1	fac0bcae74f9e07558bb53eb8f6a1255	1534	Pfam	PF05922	Peptidase inhibitor I9	35	113	1.3e-13	2024-10-09	IPR010259	Peptidase S8 propeptide/proteinase inhibitor I9
Fxa7Ag201316.1	fac0bcae74f9e07558bb53eb8f6a1255	1534	Pfam	PF05922	Peptidase inhibitor I9	787	881	5e-09	2024-10-09	IPR010259	Peptidase S8 propeptide/proteinase inhibitor I9
Fxa7Ag201316.1	fac0bcae74f9e07558bb53eb8f6a1255	1534	Phobius	NON_CYTOPLASMIC_DOMAIN	Region of a membrane-bound protein predicted to be outside the membrane, in the extracellular region.	784	1534	-	2024-10-09	-	-
Fxa7Ag201316.1	fac0bcae74f9e07558bb53eb8f6a1255	1534	Pfam	PF00082	Subtilase family	905	1373	4.5e-46	2024-10-09	IPR000209	Peptidase S8/S53 domain
Fxa7Ag201316.1	fac0bcae74f9e07558bb53eb8f6a1255	1534	Pfam	PF02225	PA domain	1140	1221	3.7e-06	2024-10-09	IPR003137	PA domain
Fxa5Bg100115.1	c36dd189e8dde6cad5fc07dd5a4e5ed0	218	Pfam	PF00082	Subtilase family	1	39	0.00054	2024-10-09	IPR000209	Peptidase S8/S53 domain
Fxa5Bg100115.1	c36dd189e8dde6cad5fc07dd5a4e5ed0	218	Pfam	PF17766	Fibronectin type-III domain	114	214	1.1e-23	2024-10-09	IPR041469	Subtilisin-like protease, fibronectin type-III domain
Fxa1Ag102648.1	b32d0994244bb177a6ff9ac58c40371a	527	Phobius	CYTOPLASMIC_DOMAIN	Region of a membrane-bound protein predicted to be outside the membrane, in the cytoplasm.	51	61	-	2024-10-09	-	-
Fxa1Ag102648.1	b32d0994244bb177a6ff9ac58c40371a	527	Phobius	NON_CYTOPLASMIC_DOMAIN	Region of a membrane-bound protein predicted to be outside the membrane, in the extracellular region.	84	94	-	2024-10-09	-	-
Fxa1Ag102648.1	b32d0994244bb177a6ff9ac58c40371a	527	Pfam	PF00082	Subtilase family	287	491	1.5e-05	2024-10-09	IPR000209	Peptidase S8/S53 domain
Fxa1Ag102648.1	b32d0994244bb177a6ff9ac58c40371a	527	Phobius	NON_CYTOPLASMIC_DOMAIN	Region of a membrane-bound protein predicted to be outside the membrane, in the extracellular region.	229	527	-	2024-10-09	-	-
Fxa1Ag102648.1	b32d0994244bb177a6ff9ac58c40371a	527	Phobius	NON_CYTOPLASMIC_DOMAIN	Region of a membrane-bound protein predicted to be outside the membrane, in the extracellular region.	167	177	-	2024-10-09	-	-
Fxa1Ag102648.1	b32d0994244bb177a6ff9ac58c40371a	527	Phobius	TRANSMEMBRANE	Region of a membrane-bound protein predicted to be embedded in the membrane.	178	197	-	2024-10-09	-	-
Fxa1Ag102648.1	b32d0994244bb177a6ff9ac58c40371a	527	Phobius	TRANSMEMBRANE	Region of a membrane-bound protein predicted to be embedded in the membrane.	31	50	-	2024-10-09	-	-
Fxa1Ag102648.1	b32d0994244bb177a6ff9ac58c40371a	527	Phobius	TRANSMEMBRANE	Region of a membrane-bound protein predicted to be embedded in the membrane.	62	83	-	2024-10-09	-	-
Fxa1Ag102648.1	b32d0994244bb177a6ff9ac58c40371a	527	Phobius	TRANSMEMBRANE	Region of a membrane-bound protein predicted to be embedded in the membrane.	95	116	-	2024-10-09	-	-
Fxa1Ag102648.1	b32d0994244bb177a6ff9ac58c40371a	527	Phobius	CYTOPLASMIC_DOMAIN	Region of a membrane-bound protein predicted to be outside the membrane, in the cytoplasm.	198	208	-	2024-10-09	-	-
Fxa1Ag102648.1	b32d0994244bb177a6ff9ac58c40371a	527	Phobius	TRANSMEMBRANE	Region of a membrane-bound protein predicted to be embedded in the membrane.	209	228	-	2024-10-09	-	-
Fxa1Ag102648.1	b32d0994244bb177a6ff9ac58c40371a	527	Phobius	TRANSMEMBRANE	Region of a membrane-bound protein predicted to be embedded in the membrane.	137	166	-	2024-10-09	-	-
Fxa1Ag102648.1	b32d0994244bb177a6ff9ac58c40371a	527	Phobius	CYTOPLASMIC_DOMAIN	Region of a membrane-bound protein predicted to be outside the membrane, in the cytoplasm.	117	136	-	2024-10-09	-	-
Fxa1Ag102648.1	b32d0994244bb177a6ff9ac58c40371a	527	Phobius	NON_CYTOPLASMIC_DOMAIN	Region of a membrane-bound protein predicted to be outside the membrane, in the extracellular region.	1	30	-	2024-10-09	-	-
Fxa1Ag102648.1	b32d0994244bb177a6ff9ac58c40371a	527	Pfam	PF00999	Sodium/hydrogen exchanger family	70	255	8e-19	2024-10-09	IPR006153	Cation/H+ exchanger
Fxa5Bg100117.1	89b052a84409be336f4e3da1ddcefb37	2000	Pfam	PF00082	Subtilase family	1389	1822	2.2e-39	2024-10-09	IPR000209	Peptidase S8/S53 domain
Fxa5Bg100117.1	89b052a84409be336f4e3da1ddcefb37	2000	Phobius	TRANSMEMBRANE	Region of a membrane-bound protein predicted to be embedded in the membrane.	505	526	-	2024-10-09	-	-
Fxa5Bg100117.1	89b052a84409be336f4e3da1ddcefb37	2000	Pfam	PF05922	Peptidase inhibitor I9	551	635	6.2e-05	2024-10-09	IPR010259	Peptidase S8 propeptide/proteinase inhibitor I9
Fxa5Bg100117.1	89b052a84409be336f4e3da1ddcefb37	2000	Pfam	PF05922	Peptidase inhibitor I9	1285	1363	2.7e-09	2024-10-09	IPR010259	Peptidase S8 propeptide/proteinase inhibitor I9
Fxa5Bg100117.1	89b052a84409be336f4e3da1ddcefb37	2000	Phobius	NON_CYTOPLASMIC_DOMAIN	Region of a membrane-bound protein predicted to be outside the membrane, in the extracellular region.	527	2000	-	2024-10-09	-	-
Fxa5Bg100117.1	89b052a84409be336f4e3da1ddcefb37	2000	Phobius	CYTOPLASMIC_DOMAIN	Region of a membrane-bound protein predicted to be outside the membrane, in the cytoplasm.	1	504	-	2024-10-09	-	-
Fxa5Bg100117.1	89b052a84409be336f4e3da1ddcefb37	2000	Pfam	PF00082	Subtilase family	658	1084	1e-41	2024-10-09	IPR000209	Peptidase S8/S53 domain
Fxa5Bg100117.1	89b052a84409be336f4e3da1ddcefb37	2000	Pfam	PF17766	Fibronectin type-III domain	1902	1997	1.7e-25	2024-10-09	IPR041469	Subtilisin-like protease, fibronectin type-III domain
Fxa5Bg100117.1	89b052a84409be336f4e3da1ddcefb37	2000	Pfam	PF17766	Fibronectin type-III domain	1164	1263	1.1e-21	2024-10-09	IPR041469	Subtilisin-like protease, fibronectin type-III domain
Fxa5Bg100117.1	89b052a84409be336f4e3da1ddcefb37	2000	Pfam	PF17766	Fibronectin type-III domain	401	499	8.3e-22	2024-10-09	IPR041469	Subtilisin-like protease, fibronectin type-III domain
Fxa5Bg100117.1	89b052a84409be336f4e3da1ddcefb37	2000	Pfam	PF02225	PA domain	884	969	2.2e-08	2024-10-09	IPR003137	PA domain
Fxa5Bg100117.1	89b052a84409be336f4e3da1ddcefb37	2000	Pfam	PF02225	PA domain	1620	1707	5.2e-09	2024-10-09	IPR003137	PA domain
Fxa5Bg100117.1	89b052a84409be336f4e3da1ddcefb37	2000	Pfam	PF02225	PA domain	122	206	8.4e-08	2024-10-09	IPR003137	PA domain
Fxa5Bg100117.1	89b052a84409be336f4e3da1ddcefb37	2000	Pfam	PF00082	Subtilase family	2	323	5.4e-27	2024-10-09	IPR000209	Peptidase S8/S53 domain
Fxa6Dg100087.1	1000ecba96fa833ed7bd41084e806b80	1324	Pfam	PF17766	Fibronectin type-III domain	1216	1319	2.3e-25	2024-10-09	IPR041469	Subtilisin-like protease, fibronectin type-III domain
Fxa6Dg100087.1	1000ecba96fa833ed7bd41084e806b80	1324	Pfam	PF05922	Peptidase inhibitor I9	593	678	2.3e-12	2024-10-09	IPR010259	Peptidase S8 propeptide/proteinase inhibitor I9
Fxa6Dg100087.1	1000ecba96fa833ed7bd41084e806b80	1324	Pfam	PF00082	Subtilase family	702	1142	2.2e-39	2024-10-09	IPR000209	Peptidase S8/S53 domain
Fxa6Dg100087.1	1000ecba96fa833ed7bd41084e806b80	1324	Pfam	PF13432	Tetratricopeptide repeat	235	295	0.018	2024-10-09	-	-
Fxa1Cg101257.1	36f0d2d4970ba30af775fb10d10cea09	256	Pfam	PF05922	Peptidase inhibitor I9	34	145	3.1e-09	2024-10-09	IPR010259	Peptidase S8 propeptide/proteinase inhibitor I9
Fxa7Ag202800.1	02b05afb5320b99b02f568cecc5fcf92	1937	Pfam	PF17766	Fibronectin type-III domain	674	772	9.3e-25	2024-10-09	IPR041469	Subtilisin-like protease, fibronectin type-III domain
Fxa7Ag202800.1	02b05afb5320b99b02f568cecc5fcf92	1937	Phobius	SIGNAL_PEPTIDE_H_REGION	Hydrophobic region of a signal peptide.	12	24	-	2024-10-09	-	-
Fxa7Ag202800.1	02b05afb5320b99b02f568cecc5fcf92	1937	Pfam	PF00931	NB-ARC domain	947	1163	9.6e-31	2024-10-09	IPR002182	NB-ARC
Fxa7Ag202800.1	02b05afb5320b99b02f568cecc5fcf92	1937	Phobius	NON_CYTOPLASMIC_DOMAIN	Region of a membrane-bound protein predicted to be outside the membrane, in the extracellular region.	30	1937	-	2024-10-09	-	-
Fxa7Ag202800.1	02b05afb5320b99b02f568cecc5fcf92	1937	Pfam	PF05922	Peptidase inhibitor I9	34	120	1e-16	2024-10-09	IPR010259	Peptidase S8 propeptide/proteinase inhibitor I9
Fxa7Ag202800.1	02b05afb5320b99b02f568cecc5fcf92	1937	Pfam	PF02225	PA domain	388	476	5.7e-09	2024-10-09	IPR003137	PA domain
Fxa7Ag202800.1	02b05afb5320b99b02f568cecc5fcf92	1937	Phobius	SIGNAL_PEPTIDE_C_REGION	C-terminal region of a signal peptide.	25	29	-	2024-10-09	-	-
Fxa7Ag202800.1	02b05afb5320b99b02f568cecc5fcf92	1937	Phobius	SIGNAL_PEPTIDE	Signal peptide region	1	29	-	2024-10-09	-	-
Fxa7Ag202800.1	02b05afb5320b99b02f568cecc5fcf92	1937	Pfam	PF20160	C-JID domain	1754	1888	1.8e-14	2024-10-09	IPR045344	C-JID domain
Fxa7Ag202800.1	02b05afb5320b99b02f568cecc5fcf92	1937	MobiDBLite	mobidb-lite	consensus disorder prediction	1914	1937	-	2024-10-09	-	-
Fxa7Ag202800.1	02b05afb5320b99b02f568cecc5fcf92	1937	Pfam	PF01582	TIR domain	775	942	2.4e-42	2024-10-09	IPR000157	Toll/interleukin-1 receptor homology (TIR) domain
Fxa7Ag202800.1	02b05afb5320b99b02f568cecc5fcf92	1937	Pfam	PF00082	Subtilase family	148	601	1.9e-46	2024-10-09	IPR000209	Peptidase S8/S53 domain
Fxa7Ag202800.1	02b05afb5320b99b02f568cecc5fcf92	1937	Phobius	SIGNAL_PEPTIDE_N_REGION	N-terminal region of a signal peptide.	1	11	-	2024-10-09	-	-
Fxa3Ag100017.1	f6c73d25e6688d1054e659eb7fefd0ca	399	Pfam	PF17766	Fibronectin type-III domain	292	389	1e-27	2024-10-09	IPR041469	Subtilisin-like protease, fibronectin type-III domain
Fxa3Ag100017.1	f6c73d25e6688d1054e659eb7fefd0ca	399	Pfam	PF02225	PA domain	91	161	2.2e-06	2024-10-09	IPR003137	PA domain
Fxa3Ag100017.1	f6c73d25e6688d1054e659eb7fefd0ca	399	Pfam	PF00082	Subtilase family	164	220	1.6e-09	2024-10-09	IPR000209	Peptidase S8/S53 domain
Fxa1Dg200690.1	4c70d94d296d0a37bdaf73c3eefda9d3	763	Phobius	SIGNAL_PEPTIDE_N_REGION	N-terminal region of a signal peptide.	1	7	-	2024-10-09	-	-
Fxa1Dg200690.1	4c70d94d296d0a37bdaf73c3eefda9d3	763	Phobius	SIGNAL_PEPTIDE_C_REGION	C-terminal region of a signal peptide.	21	24	-	2024-10-09	-	-
Fxa1Dg200690.1	4c70d94d296d0a37bdaf73c3eefda9d3	763	Phobius	NON_CYTOPLASMIC_DOMAIN	Region of a membrane-bound protein predicted to be outside the membrane, in the extracellular region.	25	763	-	2024-10-09	-	-
Fxa1Dg200690.1	4c70d94d296d0a37bdaf73c3eefda9d3	763	MobiDBLite	mobidb-lite	consensus disorder prediction	201	224	-	2024-10-09	-	-
Fxa1Dg200690.1	4c70d94d296d0a37bdaf73c3eefda9d3	763	Phobius	SIGNAL_PEPTIDE	Signal peptide region	1	24	-	2024-10-09	-	-
Fxa1Dg200690.1	4c70d94d296d0a37bdaf73c3eefda9d3	763	Pfam	PF17766	Fibronectin type-III domain	660	757	1.4e-20	2024-10-09	IPR041469	Subtilisin-like protease, fibronectin type-III domain
Fxa1Dg200690.1	4c70d94d296d0a37bdaf73c3eefda9d3	763	Phobius	SIGNAL_PEPTIDE_H_REGION	Hydrophobic region of a signal peptide.	8	20	-	2024-10-09	-	-
Fxa1Dg200690.1	4c70d94d296d0a37bdaf73c3eefda9d3	763	Pfam	PF00082	Subtilase family	135	583	7.3e-42	2024-10-09	IPR000209	Peptidase S8/S53 domain
Fxa1Dg200690.1	4c70d94d296d0a37bdaf73c3eefda9d3	763	Pfam	PF02225	PA domain	386	460	3.6e-08	2024-10-09	IPR003137	PA domain
Fxa1Dg200690.1	4c70d94d296d0a37bdaf73c3eefda9d3	763	Pfam	PF05922	Peptidase inhibitor I9	27	105	1.6e-15	2024-10-09	IPR010259	Peptidase S8 propeptide/proteinase inhibitor I9
Fxa7AgPR7_15	b1e8b36e4af22f5517e6a4300ab24ed0	55	Pfam	PF17766	Fibronectin type-III domain	6	55	7.1e-11	2024-10-09	IPR041469	Subtilisin-like protease, fibronectin type-III domain
Fxa6Bg103183.1	d220fd671593be969ddcd0ae0655a0ad	768	Phobius	SIGNAL_PEPTIDE_N_REGION	N-terminal region of a signal peptide.	1	12	-	2024-10-09	-	-
Fxa6Bg103183.1	d220fd671593be969ddcd0ae0655a0ad	768	Phobius	SIGNAL_PEPTIDE	Signal peptide region	1	28	-	2024-10-09	-	-
Fxa6Bg103183.1	d220fd671593be969ddcd0ae0655a0ad	768	Phobius	NON_CYTOPLASMIC_DOMAIN	Region of a membrane-bound protein predicted to be outside the membrane, in the extracellular region.	29	768	-	2024-10-09	-	-
Fxa6Bg103183.1	d220fd671593be969ddcd0ae0655a0ad	768	Phobius	SIGNAL_PEPTIDE_H_REGION	Hydrophobic region of a signal peptide.	13	23	-	2024-10-09	-	-
Fxa6Bg103183.1	d220fd671593be969ddcd0ae0655a0ad	768	Pfam	PF02225	PA domain	364	452	5.3e-08	2024-10-09	IPR003137	PA domain
Fxa6Bg103183.1	d220fd671593be969ddcd0ae0655a0ad	768	Pfam	PF17766	Fibronectin type-III domain	657	761	3.6e-26	2024-10-09	IPR041469	Subtilisin-like protease, fibronectin type-III domain
Fxa6Bg103183.1	d220fd671593be969ddcd0ae0655a0ad	768	Phobius	SIGNAL_PEPTIDE_C_REGION	C-terminal region of a signal peptide.	24	28	-	2024-10-09	-	-
Fxa6Bg103183.1	d220fd671593be969ddcd0ae0655a0ad	768	Pfam	PF00082	Subtilase family	134	590	2.8e-44	2024-10-09	IPR000209	Peptidase S8/S53 domain
Fxa6Bg103183.1	d220fd671593be969ddcd0ae0655a0ad	768	Pfam	PF05922	Peptidase inhibitor I9	32	109	1.4e-12	2024-10-09	IPR010259	Peptidase S8 propeptide/proteinase inhibitor I9
Fxa4Ag100661.1	114485b5677adedfd0891c9f5216aabe	450	Pfam	PF00082	Subtilase family	129	268	1.5e-16	2024-10-09	IPR000209	Peptidase S8/S53 domain
Fxa4Ag100661.1	114485b5677adedfd0891c9f5216aabe	450	Pfam	PF02225	PA domain	34	115	0.077	2024-10-09	IPR003137	PA domain
Fxa4Ag100661.1	114485b5677adedfd0891c9f5216aabe	450	Pfam	PF17766	Fibronectin type-III domain	352	444	7.5e-15	2024-10-09	IPR041469	Subtilisin-like protease, fibronectin type-III domain
Fxa5Bg100114.1	b639dc5e5b65516faa4f7cdccaccc2c9	1295	Phobius	SIGNAL_PEPTIDE	Signal peptide region	1	28	-	2024-10-09	-	-
Fxa5Bg100114.1	b639dc5e5b65516faa4f7cdccaccc2c9	1295	Pfam	PF02225	PA domain	1130	1214	6e-08	2024-10-09	IPR003137	PA domain
Fxa5Bg100114.1	b639dc5e5b65516faa4f7cdccaccc2c9	1295	Pfam	PF02225	PA domain	380	464	3.4e-06	2024-10-09	IPR003137	PA domain
Fxa5Bg100114.1	b639dc5e5b65516faa4f7cdccaccc2c9	1295	Phobius	SIGNAL_PEPTIDE_C_REGION	C-terminal region of a signal peptide.	18	28	-	2024-10-09	-	-
Fxa5Bg100114.1	b639dc5e5b65516faa4f7cdccaccc2c9	1295	Phobius	NON_CYTOPLASMIC_DOMAIN	Region of a membrane-bound protein predicted to be outside the membrane, in the extracellular region.	29	757	-	2024-10-09	-	-
Fxa5Bg100114.1	b639dc5e5b65516faa4f7cdccaccc2c9	1295	Phobius	SIGNAL_PEPTIDE_H_REGION	Hydrophobic region of a signal peptide.	6	17	-	2024-10-09	-	-
Fxa5Bg100114.1	b639dc5e5b65516faa4f7cdccaccc2c9	1295	Phobius	TRANSMEMBRANE	Region of a membrane-bound protein predicted to be embedded in the membrane.	758	777	-	2024-10-09	-	-
Fxa5Bg100114.1	b639dc5e5b65516faa4f7cdccaccc2c9	1295	Pfam	PF17766	Fibronectin type-III domain	660	760	1.3e-19	2024-10-09	IPR041469	Subtilisin-like protease, fibronectin type-III domain
Fxa5Bg100114.1	b639dc5e5b65516faa4f7cdccaccc2c9	1295	Phobius	CYTOPLASMIC_DOMAIN	Region of a membrane-bound protein predicted to be outside the membrane, in the cytoplasm.	778	1295	-	2024-10-09	-	-
Fxa5Bg100114.1	b639dc5e5b65516faa4f7cdccaccc2c9	1295	Pfam	PF00082	Subtilase family	904	1294	1.7e-26	2024-10-09	IPR000209	Peptidase S8/S53 domain
Fxa5Bg100114.1	b639dc5e5b65516faa4f7cdccaccc2c9	1295	Pfam	PF05922	Peptidase inhibitor I9	797	881	3.8e-07	2024-10-09	IPR010259	Peptidase S8 propeptide/proteinase inhibitor I9
Fxa5Bg100114.1	b639dc5e5b65516faa4f7cdccaccc2c9	1295	Pfam	PF05922	Peptidase inhibitor I9	46	131	1.3e-06	2024-10-09	IPR010259	Peptidase S8 propeptide/proteinase inhibitor I9
Fxa5Bg100114.1	b639dc5e5b65516faa4f7cdccaccc2c9	1295	Phobius	SIGNAL_PEPTIDE_N_REGION	N-terminal region of a signal peptide.	1	5	-	2024-10-09	-	-
Fxa5Bg100114.1	b639dc5e5b65516faa4f7cdccaccc2c9	1295	Pfam	PF00082	Subtilase family	154	582	1.3e-42	2024-10-09	IPR000209	Peptidase S8/S53 domain
Fxa6Dg102977.1	fe2725f8b5de0a175f174f660f52e7fd	762	Pfam	PF17766	Fibronectin type-III domain	651	755	8e-25	2024-10-09	IPR041469	Subtilisin-like protease, fibronectin type-III domain
Fxa6Dg102977.1	fe2725f8b5de0a175f174f660f52e7fd	762	Pfam	PF05922	Peptidase inhibitor I9	26	103	3.7e-13	2024-10-09	IPR010259	Peptidase S8 propeptide/proteinase inhibitor I9
Fxa6Dg102977.1	fe2725f8b5de0a175f174f660f52e7fd	762	Phobius	SIGNAL_PEPTIDE_N_REGION	N-terminal region of a signal peptide.	1	6	-	2024-10-09	-	-
Fxa6Dg102977.1	fe2725f8b5de0a175f174f660f52e7fd	762	Phobius	NON_CYTOPLASMIC_DOMAIN	Region of a membrane-bound protein predicted to be outside the membrane, in the extracellular region.	23	762	-	2024-10-09	-	-
Fxa6Dg102977.1	fe2725f8b5de0a175f174f660f52e7fd	762	Pfam	PF02225	PA domain	358	446	5.2e-08	2024-10-09	IPR003137	PA domain
Fxa6Dg102977.1	fe2725f8b5de0a175f174f660f52e7fd	762	Phobius	SIGNAL_PEPTIDE_H_REGION	Hydrophobic region of a signal peptide.	7	17	-	2024-10-09	-	-
Fxa6Dg102977.1	fe2725f8b5de0a175f174f660f52e7fd	762	Pfam	PF00082	Subtilase family	128	584	9.4e-44	2024-10-09	IPR000209	Peptidase S8/S53 domain
Fxa6Dg102977.1	fe2725f8b5de0a175f174f660f52e7fd	762	Phobius	SIGNAL_PEPTIDE_C_REGION	C-terminal region of a signal peptide.	18	22	-	2024-10-09	-	-
Fxa6Dg102977.1	fe2725f8b5de0a175f174f660f52e7fd	762	Phobius	SIGNAL_PEPTIDE	Signal peptide region	1	22	-	2024-10-09	-	-
Fxa6Bg103104.1	98673434d7769735e88253c72ed38b3c	361	Pfam	PF00082	Subtilase family	52	170	8.5e-20	2024-10-09	IPR000209	Peptidase S8/S53 domain
Fxa6Bg103104.1	98673434d7769735e88253c72ed38b3c	361	Pfam	PF17766	Fibronectin type-III domain	235	305	9.5e-17	2024-10-09	IPR041469	Subtilisin-like protease, fibronectin type-III domain
Fxa2Ag103345.1	55c352a9aadc1066f447f8236e0ff8ae	724	Pfam	PF17766	Fibronectin type-III domain	604	708	4.2e-24	2024-10-09	IPR041469	Subtilisin-like protease, fibronectin type-III domain
Fxa2Ag103345.1	55c352a9aadc1066f447f8236e0ff8ae	724	Pfam	PF00082	Subtilase family	93	529	3.3e-41	2024-10-09	IPR000209	Peptidase S8/S53 domain
Fxa2Ag103345.1	55c352a9aadc1066f447f8236e0ff8ae	724	Pfam	PF05922	Peptidase inhibitor I9	3	65	1.2e-07	2024-10-09	IPR010259	Peptidase S8 propeptide/proteinase inhibitor I9
Fxa2Ag103713.1	0464c001bec4617140de4a13fbe539c6	967	Pfam	PF00082	Subtilase family	366	808	4.2e-41	2024-10-09	IPR000209	Peptidase S8/S53 domain
Fxa2Ag103713.1	0464c001bec4617140de4a13fbe539c6	967	Pfam	PF00170	bZIP transcription factor	151	192	2.7e-07	2024-10-09	IPR004827	Basic-leucine zipper domain
Fxa2Ag103713.1	0464c001bec4617140de4a13fbe539c6	967	Pfam	PF17766	Fibronectin type-III domain	867	965	4.5e-23	2024-10-09	IPR041469	Subtilisin-like protease, fibronectin type-III domain
Fxa2Ag103713.1	0464c001bec4617140de4a13fbe539c6	967	Pfam	PF05922	Peptidase inhibitor I9	246	326	2.3e-13	2024-10-09	IPR010259	Peptidase S8 propeptide/proteinase inhibitor I9
Fxa2Ag103713.1	0464c001bec4617140de4a13fbe539c6	967	MobiDBLite	mobidb-lite	consensus disorder prediction	57	116	-	2024-10-09	-	-
Fxa2Ag103713.1	0464c001bec4617140de4a13fbe539c6	967	MobiDBLite	mobidb-lite	consensus disorder prediction	68	116	-	2024-10-09	-	-
Fxa2Ag103713.1	0464c001bec4617140de4a13fbe539c6	967	MobiDBLite	mobidb-lite	consensus disorder prediction	347	366	-	2024-10-09	-	-
Fxa7Dg100249.1	bc934ce631edecd5cec24ebd4b46ee5d	864	Pfam	PF00082	Subtilase family	1	47	0.00012	2024-10-09	IPR000209	Peptidase S8/S53 domain
Fxa7Dg100249.1	bc934ce631edecd5cec24ebd4b46ee5d	864	Pfam	PF00082	Subtilase family	313	711	3.3e-38	2024-10-09	IPR000209	Peptidase S8/S53 domain
Fxa7Dg100249.1	bc934ce631edecd5cec24ebd4b46ee5d	864	Pfam	PF17766	Fibronectin type-III domain	759	860	3.2e-20	2024-10-09	IPR041469	Subtilisin-like protease, fibronectin type-III domain
Fxa7Dg100249.1	bc934ce631edecd5cec24ebd4b46ee5d	864	Pfam	PF17766	Fibronectin type-III domain	111	205	1.2e-13	2024-10-09	IPR041469	Subtilisin-like protease, fibronectin type-III domain
Fxa7Dg100249.1	bc934ce631edecd5cec24ebd4b46ee5d	864	Pfam	PF05922	Peptidase inhibitor I9	213	289	9.3e-06	2024-10-09	IPR010259	Peptidase S8 propeptide/proteinase inhibitor I9
Fxa2Dg202931.1	2a391d28a0b450d0a98628b479c6e170	444	Pfam	PF00082	Subtilase family	2	272	1.1e-18	2024-10-09	IPR000209	Peptidase S8/S53 domain
Fxa2Dg202931.1	2a391d28a0b450d0a98628b479c6e170	444	Pfam	PF17766	Fibronectin type-III domain	326	430	6.4e-25	2024-10-09	IPR041469	Subtilisin-like protease, fibronectin type-III domain
Fxa3Bg203349.1	bca82759e83bd96b2c435501cf752f22	104	Pfam	PF00082	Subtilase family	1	56	4.6e-06	2024-10-09	IPR000209	Peptidase S8/S53 domain
Fxa3Cg103550.1	67bd937595b5e2f4c74dafbcaa96d081	751	Pfam	PF17766	Fibronectin type-III domain	652	748	6.6e-27	2024-10-09	IPR041469	Subtilisin-like protease, fibronectin type-III domain
Fxa3Cg103550.1	67bd937595b5e2f4c74dafbcaa96d081	751	Pfam	PF00082	Subtilase family	115	597	2.4e-36	2024-10-09	IPR000209	Peptidase S8/S53 domain
Fxa3Cg103550.1	67bd937595b5e2f4c74dafbcaa96d081	751	Pfam	PF02225	PA domain	378	454	4.1e-12	2024-10-09	IPR003137	PA domain
Fxa3Cg103550.1	67bd937595b5e2f4c74dafbcaa96d081	751	Pfam	PF05922	Peptidase inhibitor I9	1	86	4.2e-14	2024-10-09	IPR010259	Peptidase S8 propeptide/proteinase inhibitor I9
Fxa6Cg103000.1	2d57abece9d946242e7cf71a9cf8a84a	330	Pfam	PF00082	Subtilase family	53	171	9.7e-20	2024-10-09	IPR000209	Peptidase S8/S53 domain
Fxa6Cg103000.1	2d57abece9d946242e7cf71a9cf8a84a	330	Pfam	PF17766	Fibronectin type-III domain	235	305	1.2e-16	2024-10-09	IPR041469	Subtilisin-like protease, fibronectin type-III domain
Fxa1AgPR7_2	0c514ce59b60222c0be12f8faf253f11	41	Pfam	PF05922	Peptidase inhibitor I9	2	35	4.5e-05	2024-10-09	IPR010259	Peptidase S8 propeptide/proteinase inhibitor I9
Fxa1Dg201421.1	575f7968d8b4baeeaedd356962363693	750	Pfam	PF17766	Fibronectin type-III domain	644	747	8.6e-22	2024-10-09	IPR041469	Subtilisin-like protease, fibronectin type-III domain
Fxa1Dg201421.1	575f7968d8b4baeeaedd356962363693	750	Pfam	PF05922	Peptidase inhibitor I9	28	103	1e-15	2024-10-09	IPR010259	Peptidase S8 propeptide/proteinase inhibitor I9
Fxa1Dg201421.1	575f7968d8b4baeeaedd356962363693	750	Phobius	SIGNAL_PEPTIDE_N_REGION	N-terminal region of a signal peptide.	1	1	-	2024-10-09	-	-
Fxa1Dg201421.1	575f7968d8b4baeeaedd356962363693	750	Pfam	PF02225	PA domain	372	443	3.2e-08	2024-10-09	IPR003137	PA domain
Fxa1Dg201421.1	575f7968d8b4baeeaedd356962363693	750	Phobius	SIGNAL_PEPTIDE_H_REGION	Hydrophobic region of a signal peptide.	2	13	-	2024-10-09	-	-
Fxa1Dg201421.1	575f7968d8b4baeeaedd356962363693	750	Pfam	PF00082	Subtilase family	127	570	2.3e-41	2024-10-09	IPR000209	Peptidase S8/S53 domain
Fxa1Dg201421.1	575f7968d8b4baeeaedd356962363693	750	Phobius	SIGNAL_PEPTIDE_C_REGION	C-terminal region of a signal peptide.	14	21	-	2024-10-09	-	-
Fxa1Dg201421.1	575f7968d8b4baeeaedd356962363693	750	Phobius	SIGNAL_PEPTIDE	Signal peptide region	1	21	-	2024-10-09	-	-
Fxa1Dg201421.1	575f7968d8b4baeeaedd356962363693	750	Phobius	NON_CYTOPLASMIC_DOMAIN	Region of a membrane-bound protein predicted to be outside the membrane, in the extracellular region.	22	750	-	2024-10-09	-	-
Fxa5Ag200122.1	089d62060f5102154f74bc4573e4e37d	425	Pfam	PF17766	Fibronectin type-III domain	293	390	1.3e-20	2024-10-09	IPR041469	Subtilisin-like protease, fibronectin type-III domain
Fxa5Ag200122.1	089d62060f5102154f74bc4573e4e37d	425	Pfam	PF00082	Subtilase family	111	237	2.5e-17	2024-10-09	IPR000209	Peptidase S8/S53 domain
Fxa2Ag103344.1	e6d0933921223620b29e711c7ec44db6	1469	Pfam	PF00082	Subtilase family	845	1292	8.3e-42	2024-10-09	IPR000209	Peptidase S8/S53 domain
Fxa2Ag103344.1	e6d0933921223620b29e711c7ec44db6	1469	Pfam	PF00082	Subtilase family	106	546	7.6e-36	2024-10-09	IPR000209	Peptidase S8/S53 domain
Fxa2Ag103344.1	e6d0933921223620b29e711c7ec44db6	1469	Pfam	PF05922	Peptidase inhibitor I9	35	79	0.00065	2024-10-09	IPR010259	Peptidase S8 propeptide/proteinase inhibitor I9
Fxa2Ag103344.1	e6d0933921223620b29e711c7ec44db6	1469	Pfam	PF05922	Peptidase inhibitor I9	739	818	8.9e-14	2024-10-09	IPR010259	Peptidase S8 propeptide/proteinase inhibitor I9
Fxa2Ag103344.1	e6d0933921223620b29e711c7ec44db6	1469	Pfam	PF17766	Fibronectin type-III domain	617	709	1.2e-14	2024-10-09	IPR041469	Subtilisin-like protease, fibronectin type-III domain
Fxa2Ag103344.1	e6d0933921223620b29e711c7ec44db6	1469	Pfam	PF17766	Fibronectin type-III domain	1367	1465	9e-21	2024-10-09	IPR041469	Subtilisin-like protease, fibronectin type-III domain
Fxa3CgPR7_10	6c6003c59aa99cac20116ef72473c01b	198	Pfam	PF00082	Subtilase family	3	53	9e-05	2024-10-09	IPR000209	Peptidase S8/S53 domain
Fxa3CgPR7_10	6c6003c59aa99cac20116ef72473c01b	198	Pfam	PF17766	Fibronectin type-III domain	103	197	1.2e-25	2024-10-09	IPR041469	Subtilisin-like protease, fibronectin type-III domain
Fxa3Ag102352.1	cb80932d9bd07b26466886d14063d4ec	215	Pfam	PF00082	Subtilase family	56	211	4e-12	2024-10-09	IPR000209	Peptidase S8/S53 domain
Fxa2Cg200723.1	0be8556604c52832b2aef8ea22043a78	757	Phobius	SIGNAL_PEPTIDE_H_REGION	Hydrophobic region of a signal peptide.	2	12	-	2024-10-09	-	-
Fxa2Cg200723.1	0be8556604c52832b2aef8ea22043a78	757	MobiDBLite	mobidb-lite	consensus disorder prediction	197	219	-	2024-10-09	-	-
Fxa2Cg200723.1	0be8556604c52832b2aef8ea22043a78	757	Phobius	SIGNAL_PEPTIDE_N_REGION	N-terminal region of a signal peptide.	1	1	-	2024-10-09	-	-
Fxa2Cg200723.1	0be8556604c52832b2aef8ea22043a78	757	Pfam	PF00082	Subtilase family	130	582	1.9e-41	2024-10-09	IPR000209	Peptidase S8/S53 domain
Fxa2Cg200723.1	0be8556604c52832b2aef8ea22043a78	757	Phobius	SIGNAL_PEPTIDE	Signal peptide region	1	19	-	2024-10-09	-	-
Fxa2Cg200723.1	0be8556604c52832b2aef8ea22043a78	757	Pfam	PF05922	Peptidase inhibitor I9	24	100	5e-12	2024-10-09	IPR010259	Peptidase S8 propeptide/proteinase inhibitor I9
Fxa2Cg200723.1	0be8556604c52832b2aef8ea22043a78	757	Phobius	NON_CYTOPLASMIC_DOMAIN	Region of a membrane-bound protein predicted to be outside the membrane, in the extracellular region.	20	757	-	2024-10-09	-	-
Fxa2Cg200723.1	0be8556604c52832b2aef8ea22043a78	757	MobiDBLite	mobidb-lite	consensus disorder prediction	202	219	-	2024-10-09	-	-
Fxa2Cg200723.1	0be8556604c52832b2aef8ea22043a78	757	Pfam	PF17766	Fibronectin type-III domain	655	753	4.9e-20	2024-10-09	IPR041469	Subtilisin-like protease, fibronectin type-III domain
Fxa2Cg200723.1	0be8556604c52832b2aef8ea22043a78	757	Phobius	SIGNAL_PEPTIDE_C_REGION	C-terminal region of a signal peptide.	13	19	-	2024-10-09	-	-
Fxa7Dg102449.1	3d362d7cda87c2deb1b6e03944547dfb	1631	Phobius	SIGNAL_PEPTIDE_C_REGION	C-terminal region of a signal peptide.	25	29	-	2024-10-09	-	-
Fxa7Dg102449.1	3d362d7cda87c2deb1b6e03944547dfb	1631	Phobius	SIGNAL_PEPTIDE	Signal peptide region	1	29	-	2024-10-09	-	-
Fxa7Dg102449.1	3d362d7cda87c2deb1b6e03944547dfb	1631	Pfam	PF00931	NB-ARC domain	923	1139	2.2e-25	2024-10-09	IPR002182	NB-ARC
Fxa7Dg102449.1	3d362d7cda87c2deb1b6e03944547dfb	1631	Pfam	PF05922	Peptidase inhibitor I9	34	120	1.3e-15	2024-10-09	IPR010259	Peptidase S8 propeptide/proteinase inhibitor I9
[truncated: 811 more rows]

## Sheet: PR8
Protein	Run	Length	Prediction	Identifier	Description	Start	End	E-value	Date	InterPro ID	Description
[truncated: 70 more rows]

[truncated: 8 more sheets: PR9, PR10, PR11, PR12, PR14, PR16, PR17, PR18]
