# Supplementary material for: Pathogenesis-related proteins are evolutionarily conserved across diploid and octoploid Fragaria species
Source: Research Square preprint supplement (doi:10.21203/rs.3.rs-7264946/v1), 2025-08-27
Supplement: Supplementary file 6 [file 9a156576c4e20586d01dbf5b.xlsx]

## Sheet: Sheet1
SEQ1	SEQ2	Ka	Ks	Ka\Ks
Fxa2Ag103028	Fxa2Ag103024	0.0122	0.0058	2.1031
Fxa6Ag100088	Fxa6Bg100085	0.0054	0.0125	0.4283
Fxa2Bg203095	Fxa2Cg200774	0.0138	0.036	0.3834
Fxa3Cg103362	Fxa3Ag103752	0	0.0064	0.001
Fxa1Bg202678	Fxa1Dg202656	0.0084	0.0179	0.4721
Fxa4Cg201612	Fxa4Ag101896	0.0118	0.0182	0.6487
Fxa1Bg200636	Fxa1Dg200579	0.0155	0.0181	0.8522
Fxa5Dg200644	Fxa5Ag200697	0.0136	0.0455	0.2983
Fxa7Cg101174	Fxa7Bg201303	0.0252	0.0663	0.3794
Fxa6Ag102581	Fxa6Bg102353	0.018	0.0517	0.3488
Fxa4Bg102239	Fxa4Cg201946	0.1696	0.1463	1.159
Fxa6Ag103445	Fxa6Cg103065	0.0014	0.0011	1.3063
Fxa3Bg203877	Fxa3Ag104321	0.0036	0.0093	0.3877
Fxa5Cg200577	Fxa5Ag200640	0.0124	0.062	0.2007
Fxa5Bg100248	Fxa5Cg200222	0.0016	0.0136	0.1159
Fxa3Bg201249	Fxa3Dg201193	0.0064	0.0381	0.1685
Fxa5Ag201908	Fxa5Cg201740	0.0601	0.2219	0.2711
Fxa1Dg202179	Fxa1Ag102175	0.0292	0.069	0.423
Fxa4Ag103269	Fxa4Bg103097	0.0225	0.0718	0.3129
Fxa5Dg202038	Fxa5Ag202169	0.0099	0.0687	0.1434
Fxa1Ag102107	Fxa1Bg201989	0.0044	0.046	0.0966
Fxa5Dg202646	Fxa5Ag202903	0.0161	0.0527	0.3058
Fxa1Ag102881	Fxa1Ag102888	0	0	0.4366
Fxa7Ag203229	Fxa7Cg102970	0.0086	0.047	0.1826
Fxa6Ag104073	Fxa6Cg103627	0.0066	0.0306	0.2174
Fxa4Bg100026	Fxa4Cg200023	0.0025	0.0309	0.0809
Fxa3Bg201414	Fxa3Dg201344	0.0545	0.0706	0.7724
Fxa2Bg203731	Fxa2Ag103973	0.0373	0.1015	0.3672
Fxa1Cg100122	Fxa1Bg200120	0.0073	0.0102	0.7168
Fxa2Dg203292	Fxa2Ag103735	0.0183	0.0921	0.1985
Fxa3Cg100879	Fxa3Bg200896	0.0089	0.0055	1.609
Fxa6Bg102824	Fxa6Cg102715	0.0172	0.02	0.8585
Fxa3Bg202311	Fxa3Ag102584	0.0067	0.0308	0.2188
Fxa2Cg201453	Fxa2Cg201447	0.07	0.1665	0.4203
Fxa3Bg200910	Fxa3Bg200912	0.141	0.0262	5.3819
Fxa2Ag103946	Fxa2Cg200094	0.0211	0.0365	0.5788
Fxa7Dg101975	Fxa7Bg202183	0.0181	0.0182	0.9918
Fxa7Ag203023	Fxa7Dg102638	0.0015	0.0133	0.1113
Fxa7Dg101114	Fxa7Ag201297	0.0691	0.1342	0.5147
Fxa3Cg100908	Fxa3Ag101027	0.0443	0.0928	0.4769
Fxa1Ag101591	Fxa1Dg201452	0.0179	0.0415	0.43
Fxa3Bg201265	Fxa3Ag101397	0.0242	0.0647	0.3744
Fxa4Ag100903	Fxa4Dg100662	0.0119	0.0467	0.2548
Fxa7Ag201591	Fxa7Cg101491	0.1044	0.3549	0.2941
Fxa5Cg201482	Fxa5Ag201654	0.0699	0.0891	0.7843
Fxa3Dg202145	Fxa3Cg102035	0.1034	0.3402	0.304
Fxa7Cg102033	Fxa7Dg101866	0.0036	0.0231	0.1538
Fxa7Bg200858	Fxa7Cg100748	0.0103	0.0359	0.2876
Fxa1Bg200470	Fxa1Cg100445	0.0051	0.0225	0.2289
Fxa3Bg202022	Fxa3Ag102226	0.0154	0.0684	0.2247
Fxa3Cg101248	Fxa3Dg201198	0.0141	0.0389	0.3639
Fxa7Bg202070	Fxa7Dg101865	0.0052	0.0161	0.3246
Fxa6Ag100101	Fxa6Bg100094	0.0139	0.033	0.4199
Fxa5Ag200076	Fxa5Cg200064	0.0049	0.0937	0.0528
Fxa1Ag100877	Fxa1Bg200823	0.0066	0.0245	0.2706
Fxa6Ag101681	Fxa6Bg101543	0.005	0.0407	0.1217
Fxa3Ag103689	Fxa3Bg203365	0.0175	0.0164	1.0655
Fxa2Ag103924	Fxa2Dg203504	0.0101	0.1212	0.0832
Fxa7Bg200625	Fxa7Dg100507	0.0068	0.0001	99
Fxa1Bg200344	Fxa1Dg200320	0.0042	0.0546	0.077
Fxa1Bg201416	Fxa1Ag101536	0.0209	0.0637	0.3276
Fxa7Bg202789	Fxa7Dg102550	0.0405	0.1335	0.3034
Fxa3Cg103057	Fxa3Dg202977	0.0079	0.0213	0.3698
Fxa6Bg102428	Fxa6Dg102289	0.0083	0.0163	0.5077
Fxa3Dg200474	Fxa3Bg200497	0.0152	0.1131	0.1341
Fxa7Bg202127	Fxa7Ag202223	0.0292	0.1256	0.2323
Fxa4Dg102218	Fxa4Ag102764	0.0155	0.0418	0.3715
Fxa5Ag202332	Fxa5Dg202181	0.0086	0.0394	0.2184
Fxa4Cg202465	Fxa4Dg102251	0.0195	0.1042	0.1876
Fxa2Cg200778	Fxa2Dg202884	0.0299	0.0782	0.3826
Fxa2Bg203778	Fxa2Cg200016	0.0125	0.0206	0.6067
Fxa2Dg200120	Fxa2Ag100154	0.1186	0.2899	0.4092
Fxa4Cg202109	Fxa4Bg102408	0.0189	0.057	0.3326
Fxa3Dg200213	Fxa3Bg200246	0.0136	0.0509	0.2676
Fxa2Bg203247	Fxa2Dg203039	0.0195	0.0382	0.5101
Fxa4Ag101526	Fxa5Bg100520	0.0221	0.0391	0.5664
Fxa2Dg200160	Fxa2Bg200149	0.0191	0.0475	0.401
Fxa5Bg100570	Fxa5Ag200585	0.0467	0.1128	0.414
Fxa6Dg102911	Fxa6Cg102993	0.0116	0.037	0.3141
Fxa3Cg101720	Fxa3Ag101948	0.0156	0.0046	3.3886
Fxa3Dg200907	Fxa3Bg200973	0.0207	0.0642	0.3227
Fxa2Bg200182	Fxa2Bg200180	0	0	0.001
Fxa1Ag100763	Fxa1Cg100734	0.0577	0.0586	0.9835
Fxa3Dg200889	Fxa3Bg200965	0.0048	0.0446	0.1069
Fxa6Ag103581	Fxa6Cg103193	0.569	0.8243	0.6903
Fxa3Ag100017	Fxa3Dg200015	0.0436	0.0488	0.8936
Fxa7Dg101974	Fxa7Ag202273	0.0042	0	99
Fxa6Cg100764	Fxa6Ag100874	0.0158	0.1497	0.1056
Fxa6Bg100084	Fxa6Ag100087	0.0029	0.0105	0.2774
Fxa5Bg103145	Fxa5Cg202887	0.0629	0.1602	0.3923
Fxa1Cg102516	Fxa1Dg202299	0.0016	0.0048	0.337
Fxa4Bg102125	Fxa4Cg201855	0.0036	0.0299	0.1213
Fxa5Ag201604	Fxa5Bg101568	0.0141	0.0281	0.4999
Fxa2Ag101437	Fxa2Bg201260	0.0018	0.0165	0.1095
Fxa2Bg200107	Fxa2Dg200117	0.003	0.0123	0.2427
Fxa3Bg202122	Fxa3Ag102328	0.0018	0.0461	0.0392
Fxa7Ag200357	Fxa7Dg100317	0.0351	0.0528	0.6647
Fxa7Dg102443	Fxa7Bg202666	0.0708	0.1403	0.5042
Fxa1Cg101620	Fxa1Ag101660	0.0109	0.0189	0.5759
Fxa2Bg200089	Fxa2Dg200100	0.0086	0.0448	0.1908
Fxa7Cg102226	Fxa7Ag202380	0.0104	0.051	0.2041
Fxa2Dg202869	Fxa2Ag103284	0.042	0.0628	0.6697
Fxa1Bg200119	Fxa1Ag100127	0.0918	0.1726	0.532
Fxa3Bg200940	Fxa3Ag101054	0.0017	0.0446	0.0371
Fxa1Dg200499	Fxa1Ag100568	0.0057	0.0409	0.1391
Fxa2Bg201692	Fxa2Cg202663	0.0088	0.0262	0.3346
Fxa2Cg201943	Fxa2Dg200895	0.0099	0.0141	0.6975
Fxa5Dg201116	Fxa5Cg201088	0.0272	0.1201	0.2261
Fxa4Dg101713	Fxa2Bg200240	0.0213	0.0439	0.4859
Fxa5Ag200584	Fxa5Bg100568	0.1877	0.3254	0.5768
Fxa7Dg102047	Fxa7Ag202335	0.0054	0.0001	99
Fxa5Ag201427	Fxa2Dg200671	0.0047	0.0442	0.1069
Fxa5Bg101318	Fxa5Ag201365	0.1012	0.3846	0.2632
Fxa7Ag201687	Fxa7Bg201685	0.0252	0.0374	0.6747
Fxa1Ag101408	Fxa1Dg201265	0.0089	0.0409	0.2168
Fxa4Dg101306	Fxa4Cg201411	0.0185	0.0408	0.4529
Fxa5Cg200134	Fxa5Bg100158	0.0036	0.0274	0.1327
Fxa7Ag201829	Fxa7Dg101597	0.0225	0.0551	0.408
Fxa2Ag100620	Fxa2Bg200518	0.0739	0.0781	0.947
Fxa3Cg100156	Fxa3Ag100164	0.006	0.0098	0.6113
Fxa4Cg201994	Fxa4Bg102289	0.0494	0.1458	0.3386
Fxa2Ag102675	Fxa2Dg202454	0.0094	0.0177	0.5343
Fxa4Ag102818	Fxa4Dg102268	0.0359	0.0538	0.668
Fxa4Ag100976	Fxa4Cg200577	0.0214	0.0321	0.6668
Fxa6Ag105088	Fxa6Cg104529	0.0094	0.0412	0.227
Fxa1Cg100919	Fxa1Ag100971	0.011	0.0141	0.7805
Fxa6Cg100242	Fxa6Bg100238	0.1316	0.3052	0.431
Fxa2Dg203270	Fxa2Ag103713	0.0208	0.0377	0.5505
Fxa3Ag101223	Fxa3Dg201053	0.039	0.1005	0.3883
Fxa7Cg101133	Fxa7Ag201239	0.0356	0.0524	0.6784
Fxa7Ag200897	Fxa7Bg200912	0.0131	0.0344	0.3805
Fxa2Bg202478	Fxa2Dg202499	0.0045	0.0104	0.4351
Fxa6Cg104413	Fxa6Ag104950	0.0071	0.0196	0.362
Fxa1Ag100791	Fxa1Cg100755	0.0422	0.0621	0.6798
Fxa3Cg100905	Fxa3Ag101024	0.0566	0.0203	2.7922
Fxa4Ag100700	Fxa4Bg100695	0.003	0.0176	0.1677
Fxa4Bg101836	Fxa4Cg201603	0.0261	0.0074	3.5218
Fxa4Cg201604	Fxa4Ag101890	0.0114	0.1746	0.0654
Fxa7Bg200531	Fxa7Dg100415	0.0022	0.0194	0.1137
Fxa4Bg103247	Fxa4Cg203042	0.008	0.0207	0.3884
Fxa7Dg102201	Fxa7Cg102323	0.0244	0.0187	1.3028
Fxa6Ag103365	Fxa6Bg103099	0.0097	0.0352	0.2759
Fxa3Ag103935	Fxa3Cg103519	0.0205	0.0412	0.4966
Fxa3Bg200514	Fxa3Ag100552	0.0185	0.0859	0.2149
Fxa4Dg101511	Fxa4Ag101967	0.0134	0.0434	0.3094
Fxa7Dg102205	Fxa7Ag202494	0.016	0.0339	0.4731
Fxa3Bg202137	Fxa3Dg202122	0.0138	0.0314	0.4408
Fxa2Dg201139	Fxa2Bg201155	0.0026	0.0338	0.076
Fxa4Ag102502	Fxa4Bg102457	0.0095	0.0447	0.2118
Fxa4Bg101824	Fxa4Ag101884	0.0089	0.0181	0.4913
Fxa6Ag102259	Fxa6Bg102044	0.0113	0.0833	0.1359
Fxa6Bg101544	Fxa6Ag101679	0.0072	0.0241	0.3
Fxa1Bg200413	Fxa3Dg200836	0.4634	0.7795	0.5944
Fxa2Ag103345	Fxa2Ag103351	0.0121	0.0201	0.6017
Fxa6Ag102800	Fxa6Dg102426	0.0149	0.0438	0.3405
Fxa5Cg200732	Fxa5Bg100811	0.0154	0.0449	0.3434
Fxa4Bg100662	Fxa4Dg100535	0.0034	0.0159	0.2128
Fxa6Dg103588	Fxa6Cg103689	0.1051	0.118	0.891
Fxa2Cg200470	Fxa2Dg203156	0.0602	0.1016	0.5929
Fxa5Dg201644	Fxa5Ag201755	0.0104	0.0357	0.292
Fxa4Cg201599	Fxa4Bg101827	0.0053	0.0463	0.1141
Fxa3Ag103749	Fxa3Cg103357	0.0245	0.0455	0.5378
Fxa7Bg201665	Fxa7Dg101433	0.0154	0.0384	0.401
Fxa7Bg200320	Fxa7Ag200320	0.0148	0.0328	0.4506
Fxa7Ag202796	Fxa7Dg102445	0.0243	0.048	0.5071
Fxa4Ag101282	Fxa4Cg201108	0.0084	0.0467	0.1797
Fxa4Cg202039	Fxa4Bg102344	0.0191	0.0427	0.4471
Fxa5Ag201070	Fxa5Ag201069	0.0247	0.0825	0.2994
Fxa5Ag200169	Fxa5Bg100176	0.0297	0.1024	0.2901
Fxa6Dg101406	Fxa6Bg101490	0.0059	0.0264	0.2255
Fxa1Ag101253	Fxa1Cg101210	0.0116	0.0426	0.2724
Fxa7Bg202688	Fxa7Dg102466	0.0179	0.0125	1.4355
Fxa7Bg200977	Fxa6Cg103195	0.0215	0.0421	0.5119
Fxa3Cg102122	Fxa3Ag102423	0.0387	0.1044	0.3702
Fxa1Bg201230	Fxa1Ag101329	0.0175	0.0632	0.2768
Fxa6Dg103683	Fxa6Ag104234	0.0086	0.0412	0.2099
Fxa3Ag103127	Fxa3Bg202821	0.2483	0.233	1.0658
Fxa6Ag103518	Fxa6Dg103052	0.0456	0.0005	99
Fxa1Bg200841	Fxa1Ag100889	0.0079	0.0226	0.3473
Fxa5Bg101386	Fxa5Cg201295	0.0052	0.0372	0.14
Fxa4Ag100974	Fxa4Cg200580	0.0229	0.0433	0.528
Fxa6Bg101324	Fxa6Ag101490	0.0134	0.0312	0.4282
Fxa5Dg202164	Fxa5Bg102243	0.0119	0.0307	0.3895
Fxa3Cg102100	Fxa3Bg202178	0.0472	0.0799	0.5909
Fxa6Bg103485	Fxa6Dg103277	0.0035	0.0108	0.3206
Fxa6Bg102355	Fxa6Ag102584	0.0031	0.0349	0.0894
Fxa3Bg202696	Fxa7Dg100320	0.0226	0.0546	0.414
Fxa3Ag102425	Fxa3Ag102436	0.0027	0	99
Fxa1Bg201083	Fxa1Ag101154	0.0011	0	99
Fxa7Dg101925	Fxa7Ag202220	0.0053	0.0583	0.0912
Fxa5Bg100889	Fxa5Ag200926	0.0161	0.0347	0.4636
Fxa2Ag100470	Fxa2Bg200376	0.0181	0.0801	0.226
Fxa6Ag104410	Fxa6Cg103948	0.0029	0.0305	0.0943
Fxa7Bg202988	Fxa7Ag203153	0.0365	0.0767	0.4753
Fxa2Ag100015	Fxa2Bg200041	0.0133	0.033	0.4034
Fxa1Ag100794	Fxa1Cg100758	0.0037	0.0194	0.1907
Fxa7Dg100818	Fxa7Bg201006	0.0123	0.0363	0.34
Fxa2Bg200415	Fxa2Ag100504	0.003	0.0354	0.0845
Fxa3Ag103554	Fxa3Cg103174	0.0042	0.0699	0.0606
Fxa7Bg203081	Fxa7Ag203258	0.0184	0.0344	0.5354
Fxa7Bg202402	Fxa7Dg102204	0.0056	0.0255	0.2207
Fxa3Bg200566	Fxa3Cg100560	0.0069	0.018	0.3832
Fxa6Dg103105	Fxa6Cg103192	0.0182	0.0642	0.2832
Fxa4Cg202506	Fxa4Dg102293	0.0178	0.0469	0.3804
Fxa3Cg100022	Fxa3Bg200023	0.0028	0.0075	0.3736
Fxa3Bg202098	Fxa3Dg202144	0.0079	0.041	0.1929
Fxa5Bg101569	Fxa5Ag201605	0.0528	0.0711	0.7421
Fxa5Bg100132	Fxa5Dg200117	0.0072	0.0156	0.4646
Fxa6Bg104329	Fxa6Ag104769	0.0283	0.0894	0.3169
Fxa4Ag102820	Fxa4Cg202485	0.0218	0.0553	0.3945
Fxa6Bg103183	Fxa6Dg102977	0.0081	0.0424	0.1905
Fxa1Ag101540	Fxa1Dg201397	0.0206	0.0798	0.2579
Fxa3Cg101694	Fxa3Dg201632	0.0063	0.0197	0.3216
Fxa1Ag100762	Fxa1Bg200722	0.0227	0.0536	0.4234
Fxa1Ag101139	Fxa1Bg201067	0.0065	0.0319	0.2029
Fxa2Dg202930	Fxa2Ag103344	0.0447	0.0694	0.6447
Fxa5Bg100633	Fxa5Cg200585	0.0274	0.0175	1.5667
Fxa4Dg101456	Fxa4Bg101834	0.0198	0.0002	99
Fxa6Dg102216	Fxa6Cg102241	0.0036	0.0152	0.2364
Fxa7Ag201703	Fxa7Bg201696	0.023	0.0839	0.2744
Fxa7Ag202234	Fxa7Dg101938	0.0077	0.0107	0.7173
Fxa3Bg203470	Fxa3Cg103403	0.0008	0.041	0.0204
Fxa5Bg101122	Fxa5Cg201045	0.013	0.0373	0.3495
Fxa3Bg202816	Fxa3Ag103113	0.1075	0.33	0.3258
Fxa3Ag101284	Fxa3Bg201166	0.0065	0.0284	0.2276
Fxa3Cg102355	Fxa3Bg202427	0.0028	0.02	0.1409
Fxa6Cg102532	Fxa6Dg102489	0.011	0.0311	0.3521
Fxa3Ag100995	Fxa3Dg200826	0.0474	0.0908	0.522
Fxa1Dg200690	Fxa1Bg200747	0.0074	0.0544	0.1369
Fxa7Bg201499	Fxa7Cg101383	0.0049	0.0424	0.1166
Fxa2Ag101004	Fxa2Bg200892	0.0188	0.0506	0.3714
Fxa4Bg102291	Fxa4Ag102346	0.0292	0.0419	0.6984
Fxa3Bg200527	Fxa3Cg100517	0.0118	0.0284	0.4144
Fxa5Ag201317	Fxa5Cg201184	0.0152	0.0365	0.4153
Fxa5Ag200562	Fxa5Bg100536	0.0959	0.139	0.69
Fxa1Dg200894	Fxa1Cg100964	0.0035	0.0307	0.1133
Fxa3Dg201835	Fxa3Ag102131	0.0668	0.1117	0.5982
Fxa3Bg203513	Fxa3Dg203299	0.0104	0.027	0.386
Fxa7Ag200896	Fxa7Bg200911	0.0561	0.1698	0.3305
Fxa2Dg202476	Fxa2Ag102647	0.0116	0.036	0.3223
Fxa6Bg103886	Fxa6Cg103765	0.1915	0.2772	0.6907
Fxa6Ag103879	Fxa6Bg103534	0.0035	0.0346	0.1006
Fxa3Ag101017	Fxa3Cg100894	0.0034	0.0073	0.4608
Fxa1Cg101538	Fxa1Bg201460	0.0103	0.0187	0.5479
Fxa2Dg203481	Fxa2Cg200139	0.0234	0.0594	0.3945
Fxa7Dg101961	Fxa7Ag202260	0	0.0035	0.001
Fxa4Cg201606	Fxa4Cg201605	1.1299	4.3341	0.2607
Fxa7Cg101221	Fxa7Bg201339	0.0078	0.0256	0.3033
Fxa7Dg100552	Fxa7Ag200621	0.0016	0.0102	0.1593
Fxa4Cg201973	Fxa4Bg102260	0.016	0.032	0.4998
Fxa5Bg100564	Fxa5Dg200533	0.0832	0.1453	0.5728
Fxa2Bg203395	Fxa2Dg203395	0.0067	0.0128	0.5271
Fxa7Dg102051	Fxa7Ag202341	0.0112	0.0062	1.8181
Fxa1Cg101019	Fxa1Bg201005	0.0194	0.0478	0.4067
Fxa1Cg101136	Fxa1Dg201060	0.0035	0.022	0.1584
Fxa2Ag103305	Fxa2Dg202892	0.0612	0.0986	0.621
Fxa5Dg200099	Fxa5Ag200107	0.0138	0.0367	0.3774
Fxa4Dg101525	Fxa4Ag101985	0.1114	0.2237	0.4982
Fxa6Bg103087	Fxa6Dg102898	0.0064	0.0196	0.3269
Fxa2Bg200610	Fxa2Dg200675	0.0186	0.0515	0.3612
Fxa2Dg201444	Fxa2Cg202470	0.0077	0.0171	0.4473
Fxa2Ag101011	Fxa2Bg200900	0.0159	0.0291	0.5476
Fxa3Ag100798	Fxa3Cg100730	0.0071	0.0166	0.4288
Fxa4Bg100831	Fxa4Dg100661	0.0088	0.0356	0.2458
Fxa3Bg201417	Fxa3Ag101594	0.017	0.0355	0.4775
Fxa4Bg103167	Fxa4Dg102747	0.0929	0.57	0.163
Fxa6Bg100661	Fxa6Ag100713	0.0089	0.0443	0.2003
Fxa3Ag100129	Fxa3Bg200132	0.0178	0.0492	0.3617
Fxa3Cg102073	Fxa3Bg202148	0.0141	0.0113	1.2444
Fxa5Bg100048	Fxa5Ag200052	0.0163	0.0495	0.3302
Fxa7Cg102638	Fxa7Ag202800	0.1066	0.203	0.5249
Fxa6Dg100995	Fxa6Bg101114	0.0039	0.0449	0.087
Fxa3Ag103537	Fxa3Cg103158	0.0787	0.1425	0.5523
Fxa2Bg200574	Fxa2Ag100671	0.0376	0.1227	0.3065
Fxa6Ag103878	Fxa6Dg103343	0.0123	0.0342	0.3598
Fxa3Dg203567	Fxa3Ag104186	0.0422	0.0713	0.5914
Fxa7Bg201746	Fxa7Ag201763	0.0147	0.0709	0.2079
Fxa2Cg201660	Fxa2Dg200577	0.0099	0.0074	1.3438
Fxa5Cg201455	Fxa5Ag201627	0.025	0.0877	0.2852
Fxa3Cg103766	Fxa3Dg203634	0.0068	0.0338	0.2
Fxa6Cg102089	Fxa6Dg102069	0.0191	0.0354	0.5413
Fxa4Ag100007	Fxa4Bg100005	0.002	0.0084	0.2369
Fxa7Cg101652	Fxa7Dg101519	0.0113	0.0624	0.1816
Fxa3Cg103354	Fxa3Ag103743	0.0015	0.003	0.4978
Fxa6Cg101468	Fxa6Dg101386	0.0018	0.073	0.025
Fxa4Cg200004	Fxa4Dg100004	0.0026	0.006	0.4297
Fxa3Cg103359	Fxa3Ag103751	0.0026	0.0048	0.5493
Fxa6Dg101814	Fxa7Dg101238	0.0075	0.0518	0.1448
Fxa2Dg201821	Fxa6Dg102912	0.0281	0.0703	0.3994
Fxa3Bg202316	Fxa7Dg102549	0.1686	0.6356	0.2653
Fxa6Bg103698	Fxa6Cg103590	0.0123	0.1197	0.1028
Fxa3Bg200481	Fxa3Cg100463	0.0056	0.0202	0.2751
Fxa4Bg101930	Fxa4Dg101544	0.0072	0.0274	0.262
Fxa7Cg101372	Fxa7Dg101262	0.0159	0.0441	0.3608
Fxa6Bg103361	Fxa6Ag103658	0.0159	0.0441	0.3617
Fxa3Ag101026	Fxa3Cg100907	0.0204	0.0384	0.53
Fxa4Dg101927	Fxa4Cg202083	0.0151	0.0197	0.7673
Fxa4Bg100203	Fxa4Cg200178	0.0132	0.0167	0.7948
Fxa6Dg100739	Fxa6Bg100835	0.0074	0.0115	0.6471
Fxa1Ag100750	Fxa1Cg100720	0.0998	0.1766	0.5651
Fxa2Bg201713	Fxa2Ag101892	0.0882	0.1686	0.5233
Fxa5Dg201823	Fxa5Bg101907	0.0085	0.0152	0.5619
Fxa4Bg102401	Fxa4Dg101943	0.0051	0.0165	0.3104
Fxa1Dg200906	Fxa1Bg200961	0.009	0.0307	0.2931
Fxa4Cg202845	Fxa4Ag103230	0.0049	0.0439	0.1105
Fxa6Bg103777	Fxa6Dg103560	0.0038	0.0283	0.1331
Fxa7Ag202573	Fxa7Cg102402	0.0198	0.0694	0.2856
Fxa5Ag200641	Fxa5Dg200593	0.0394	0.0837	0.4706
Fxa7Bg202437	Fxa7Cg102358	0.0042	0.0375	0.1109
Fxa3Cg100829	Fxa3Ag100935	0.0145	0.0213	0.6798
Fxa6Dg101926	Fxa6Ag102261	0.0135	0.0216	0.6247
Fxa4Bg101837	Fxa4Cg201607	0.0054	0.0874	0.0613
Fxa7Cg102220	Fxa7Bg202286	0.107	0.1993	0.5368
Fxa7Dg102629	Fxa7Ag203011	0	0	0.4769
Fxa4Dg101458	Fxa4Dg101455	0.0395	0.4981	0.0794
Fxa7Cg101195	Fxa2Ag103814	0.0401	0.1278	0.3138
Fxa2Cg203480	Fxa2Bg202582	0.023	0.0439	0.5251
Fxa4Cg202657	Fxa6Dg103264	0.0014	0.0058	0.2339
Fxa2Ag100477	Fxa2Dg200462	0.0104	0.0391	0.2671
Fxa7Cg102619	Fxa7Dg102436	0.0409	0.0388	1.0533
Fxa4Bg100826	Fxa4Bg100830	0	0	0.4541
Fxa6Cg104196	Fxa6Dg104105	0.0187	0.0274	0.6837
Fxa4Bg101663	Fxa4Cg201439	0.01	0.0205	0.4861
Fxa7Dg101164	Fxa7Dg101165	0.1268	0.3297	0.3847
Fxa3Dg200847	Fxa3Ag101032	0.0142	0.0164	0.8688
Fxa5Bg101882	Fxa5Cg201763	0.0094	0.023	0.4096
Fxa1Bg202251	Fxa1Dg201980	0.021	0.0249	0.8454
Fxa7Cg102102	Fxa7Dg101953	0.03	0.0231	1.2991
Fxa7Dg101260	Fxa7Cg101371	0.0248	0.0413	0.6002
Fxa4Cg200358	Fxa4Bg100347	0.0077	0.0454	0.1691
Fxa2Dg202722	Fxa2Cg200942	0.0068	0.0179	0.3801
Fxa7Bg202168	Fxa7Cg102113	0.0079	0.0413	0.1922
Fxa4Ag100754	Fxa4Dg100624	0.1206	0.2348	0.5135
Fxa7Dg101452	Fxa7Cg101588	0.0845	0.1707	0.4949
Fxa3Ag103474	Fxa3Dg203009	0.034	0.0522	0.6522
Fxa3Ag101392	Fxa3Cg101246	0.0049	0.0155	0.316
Fxa2Dg201423	Fxa2Ag101657	0.0197	0.034	0.5783
Fxa1Cg101523	Fxa1Dg201421	0.0082	0.0547	0.1495
Fxa3Ag103349	Fxa3Bg203030	0.0096	0.0887	0.1086
Fxa1Dg200689	Fxa1Dg200688	0.0008	0.0024	0.3287
Fxa4Cg202188	Fxa4Cg202194	0.0315	0.0565	0.5572
Fxa3Bg203461	Fxa3Dg203242	0.009	0.0251	0.3603
Fxa2Dg200667	Fxa2Ag100732	0.0046	0.0208	0.2207
Fxa4Bg102744	Fxa4Dg102295	0.0163	0.0225	0.7243
Fxa4Ag101145	Fxa4Bg101163	0.0053	0.0511	0.1043
Fxa2Ag100846	Fxa2Bg200710	0.0131	0.0803	0.163
Fxa5Dg200535	Fxa5Bg100565	0.013	0.0226	0.5747
Fxa1Cg101069	Fxa1Bg201051	0.0077	0.0251	0.3084
Fxa7Bg201537	Fxa7Ag201535	0.0256	0.0148	1.7244
Fxa7Ag202374	Fxa7Dg102086	0.0438	0.0601	0.7298
Fxa5Ag200058	Fxa5Bg100055	0.0116	0.0349	0.3327
Fxa3Ag100972	Fxa3Bg200870	0.0089	0.0375	0.2369
Fxa4Cg200480	Fxa4Bg100519	0.0095	0.0167	0.5659
Fxa6Ag101370	Fxa7Ag201692	0.0451	0.1087	0.4145
Fxa7Ag200981	Fxa7Dg100804	0.0128	0.042	0.3051
Fxa4Ag103537	Fxa4Dg102892	0.0015	0.0141	0.1086
Fxa6Ag103376	Fxa6Bg103104	0.0085	0.0342	0.2497
Fxa4Bg101728	Fxa4Dg101386	0.0099	0.0151	0.6542
Fxa7Ag201694	Fxa7Dg101448	0.0317	0.0462	0.686
Fxa6Dg101517	Fxa6Ag101768	0.0118	0.0496	0.2371
Fxa3Ag101074	Fxa3Cg100958	0.0039	0.0045	0.849
Fxa6Ag104285	Fxa6Cg103824	0.0043	0.0138	0.3114
Fxa5Dg201262	Fxa5Cg201226	0.0092	0.0207	0.4439
Fxa6Bg102113	Fxa6Cg102029	0.0245	0.0364	0.6722
Fxa2Dg200224	Fxa2Ag100258	0.2408	0.5422	0.4441
Fxa2Bg201129	Fxa2Cg202155	0.0137	0.0244	0.5618
Fxa7Cg100039	Fxa7Ag200079	0.0011	0.002	0.5317
Fxa4Ag103358	Fxa4Bg103176	0.0463	0.1704	0.2716
Fxa4Cg202511	Fxa4Ag102847	0.012	0.0557	0.2152
Fxa5Bg102206	Fxa5Ag202264	0.0084	0.0449	0.1866
Fxa7Dg100761	Fxa7Cg100782	0.0208	0.0305	0.6809
Fxa2Cg200204	Fxa2Ag103844	0.0095	0.0151	0.627
Fxa6Ag101798	Fxa6Bg101652	0.0196	0.0352	0.5579
Fxa6Bg100807	Fxa6Dg100712	0.0147	0.0623	0.2355
Fxa3Cg100175	Fxa3Dg200161	0.0027	0.021	0.1306
Fxa3Dg202938	Fxa3Cg103016	0.0129	0.0526	0.2447
Fxa5Ag200153	Fxa5Bg100160	0.0072	0.0223	0.3246
Fxa7Bg202832	Fxa7Dg102591	0.0097	0.0214	0.4547
Fxa6Ag105077	Fxa6Ag105076	0.0519	0.1365	0.3804
Fxa2Ag103131	Fxa2Ag103133	0.0099	0.0136	0.7255
Fxa4Cg201587	Fxa4Ag101872	0.0058	0.0605	0.0958
Fxa6Ag101678	Fxa6Bg101549	0.0643	0.0746	0.8615
Fxa7Ag202797	Fxa7Bg202668	0.1131	0.3695	0.3062
Fxa5Dg201301	Fxa5Cg201257	0.0171	0.0185	0.9215
Fxa7Dg100805	Fxa7Ag200983	0.0218	0.047	0.464
Fxa5Dg200230	Fxa5Bg100252	0.0161	0.0674	0.2388
Fxa2Dg202451	Fxa2Cg203430	0.0076	0.0325	0.234
Fxa5Bg100862	Fxa5Cg200783	0.0963	0.2782	0.3463
Fxa6Bg102972	Fxa6Dg102796	0.0113	0.0342	0.329
Fxa2Ag103885	Fxa2Cg200158	0.0128	0.0381	0.3351
Fxa3Ag100864	Fxa7Bg202184	0.0293	0.0413	0.7097
Fxa6Cg101456	Fxa6Cg101454	0	0	0.4381
Fxa1Cg100730	Fxa1Ag100760	0.0539	0.0843	0.6385
Fxa7Cg100882	Fxa7Ag200977	0.0693	0.1092	0.6351
Fxa3Dg201720	Fxa3Cg101785	0.0085	0.0301	0.2828
Fxa4Bg101880	Fxa4Ag101943	0.0137	0.0517	0.2644
Fxa2Bg203159	Fxa2Dg202947	0.0326	0.0579	0.5629
Fxa3Bg203514	Fxa3Dg203304	0.008	0.0125	0.6402
Fxa2Dg201787	Fxa2Bg201914	0.0047	0.0273	0.1733
Fxa2Bg201535	Fxa2Dg201486	0.0314	0.0451	0.6958
Fxa1Cg102015	Fxa1Ag102022	0.01	0.0357	0.2802
Fxa2Dg200230	Fxa2Ag100259	0.0882	0.2745	0.3213
Fxa6Dg100627	Fxa6Cg100677	0.0091	0.0259	0.3513
Fxa3Cg100883	Fxa3Ag101002	0	0.0093	0.001
Fxa4Ag100209	Fxa4Bg100206	0.0586	0.0759	0.7719
Fxa3Cg100895	Fxa3Ag101020	0.2338	1.2923	0.1809
Fxa2Bg202845	Fxa2Dg202622	0.0071	0.0195	0.3659
Fxa3Ag101076	Fxa3Cg100960	0.0011	0.0022	0.4769
Fxa1Cg100729	Fxa1Ag100758	0.2937	0.4466	0.6576
Fxa3Cg100731	Fxa3Ag100799	0.0049	0.0049	1.0199
Fxa4Bg102838	Fxa4Dg102388	0.0095	0.0094	1.0149
Fxa3Cg103704	Fxa3Bg203775	0.0199	0.0492	0.4055
Fxa5Ag201051	Fxa2Ag103636	0.0358	0.0559	0.6407
Fxa7Bg201074	Fxa7Ag201063	0.0208	0.0246	0.846
Fxa4Ag100980	Fxa4Dg100808	0.0222	0.0431	0.5161
Fxa1Cg101560	Fxa1Dg201455	0.0082	0.0249	0.3296
Fxa6Bg100751	Fxa6Dg100663	0.0165	0.0332	0.4978
Fxa5Cg202258	Fxa5Bg102410	0.0231	0.0722	0.3199
Fxa4Bg102387	Fxa4Ag102435	0.0248	0.0927	0.2676
Fxa5Bg103214	Fxa5Dg203005	0.0105	0.0313	0.3344
Fxa1Ag100297	Fxa1Dg200270	0.0217	0.0458	0.4749
Fxa6Bg102533	Fxa6Ag102772	0.0049	0.027	0.182
Fxa7Dg101792	Fxa4Ag101599	0.0106	0.0113	0.9407
Fxa5Ag200587	Fxa5Cg200531	0.012	0.0349	0.3447
Fxa5Dg201505	Fxa5Dg201504	0.0059	0.0175	0.3383
Fxa2Dg203533	Fxa2Bg203700	0.1989	0.5791	0.3435
Fxa3Dg202068	Fxa3Ag102387	0.0305	0.064	0.4764
Fxa3Ag103977	Fxa3Cg103550	0.0019	0.0118	0.1576
Fxa3Bg200904	Fxa3Dg200844	0.0346	0.0912	0.3794
Fxa4Cg201637	Fxa4Dg101479	0.006	0.0232	0.2588
Fxa1Bg201756	Fxa1Dg201735	0.0104	0.0221	0.4709
Fxa7Bg202143	Fxa7Dg101939	0.0346	0.1852	0.1869
Fxa4Cg200300	Fxa4Ag100336	0.0145	0.052	0.2792
Fxa7Bg200529	Fxa7Ag200484	0.0118	0.04	0.2949
Fxa1Dg200849	Fxa1Ag100972	0.0204	0.0494	0.412
Fxa4Dg101972	Fxa4Cg201585	0.0083	0.0188	0.4441
Fxa5Bg103615	Fxa5Bg103626	0	0.0284	0.001
Fxa2Cg200093	Fxa2Ag103947	0.0411	0.1011	0.4067
Fxa1Dg202626	Fxa1Dg202811	0.013	0.0161	0.8046
Fxa7Ag202916	Fxa7Cg102731	0.0251	0.0668	0.3755
Fxa7Dg102467	Fxa7Ag202821	0.0105	0.0179	0.5846
Fxa1Cg100732	Fxa1Dg200670	0.023	0.0552	0.4169
Fxa2Cg201390	Fxa2Ag100194	0.0369	0.0613	0.6026
Fxa4Dg102826	Fxa4Ag103448	0.0204	0.0635	0.3215
Fxa5Bg103607	Fxa5Bg103620	0.0897	0.0987	0.9086
Fxa7Cg102546	Fxa2Ag100657	0.0062	0.0124	0.5019
Fxa1Bg202766	Fxa1Ag102683	0.0056	0.022	0.256
Fxa3Bg201431	Fxa3Cg101418	0.029	0.0578	0.5017
Fxa4Dg101453	Fxa4Ag101887	0.0055	0.0329	0.166
Fxa1Cg100237	Fxa1Ag100274	0.0188	0.027	0.6981
Fxa7Ag201003	Fxa7Cg100888	0.0871	0.2805	0.3106
Fxa7Cg102732	Fxa7Bg202783	0.0074	0.049	0.1514
Fxa1Dg201555	Fxa1Ag101696	0.013	0.0065	1.985
Fxa5Cg200925	Fxa5Dg200976	0.0164	0.0341	0.4821
Fxa2Cg201000	Fxa2Dg202667	0.2654	0.4674	0.5679
Fxa5Dg201550	Fxa5Bg101619	0.0043	0.0312	0.1385
Fxa2Cg200089	Fxa2Bg203704	0.0071	0.0277	0.2568
Fxa3Bg202968	Fxa3Cg102897	0.0205	0.0339	0.6051
Fxa7Dg100716	Fxa7Cg100746	0.0029	0.0023	1.2609
Fxa2Ag102243	Fxa2Dg201928	0.0199	0.0738	0.2701
Fxa7Ag201275	Fxa7Cg101171	0.0026	0.014	0.1866
Fxa5Ag200889	Fxa5Cg200773	0.0303	0.074	0.409
Fxa2Dg203415	Fxa2Ag103845	0.0274	0.0003	99
Fxa5Dg201423	Fxa5Bg101475	0.0016	0.059	0.027
Fxa4Dg101512	Fxa4Ag101968	0.0157	0.0081	1.9397
Fxa1Ag102106	Fxa1Bg201988	0.0201	0.0666	0.3013
Fxa3Dg201363	Fxa3Dg201370	0.0647	0.091	0.7108
