# Supplementary material for: Pathogenesis-related proteins are evolutionarily conserved across diploid and octoploid Fragaria species
Source: Research Square preprint supplement (doi:10.21203/rs.3.rs-7264946/v1), 2025-08-27
Supplement: Supplementary file 7 [file b34f4441d3f9d0549c804a68.xlsx]

## Sheet: PR1 Predicted Domains
Domain	Number of Genes with 1 of the Domain	Number of Genes with Multiple of the Domain	Total Number of Genes with the Domain	Percent of Genes with the Domain
Disordered region	1	5	6	12
CRISP domain	38	7	45	90
Signal peptide region	34	0	34	68
Transmembrane domain	4	3	7	14

## Sheet: PR2 Predicted Domains
Domain	Number of Genes with 1 of the Domain	Number of Genes with Multiple of the Domain	Total Number of Genes with the Domain	Percent of Genes with the Domain
Disordered region	12	24	36	21.4
Glycosyl hydrolase 17	156	4	160	95.2
Papain family cysteine protease	2	0	2	1.2
Regulator of Vps4 activity in the MVB pathway	1	0	1	0.6
RNA recognition motif	4	0	4	2.4
Signal peptide region	110	0	110	65.5
Transmembrane domain	50	9	59	35.1
X8 domain	86	1	87	51.8

## Sheet: PR3 Predicted Domains
Domain	Number of genes with 1 of the domain	Number of genes with multiple of the domain	Total number of genes	Percent of genes
Chitin recognition domain	9	2	11	29.7
Chitinase class I	23	13	36	97.3
Signal peptide region	24	0	24	64.9
Transmembrane domain	4	2	6	16.2

## Sheet: PR4 Predicted Domains
Domain	Number of genes with 1 of the domain	Number of genes with multiple of the domain	Total number of genes	Percent of genes
Barwin domain	9	1	10	90.9
Disordered region	1	0	1	9.1
Signal peptide region	3	0	3	27.3

## Sheet: PR5 Predicted Domains
Domain	Number of genes with 1 of the domain	Number of genes with multiple of the domain	Total number of genes	Percent of genes
Disordered region	2	6	8	11.9
Microfibril-associated domain	1	0	1	1.5
Reverse transcriptase-like	1	0	1	1.5
Signal peptide region	45	0	45	67.2
Thaumatin	48	17	65	97
Transmembrane domain	6	21	27	40.3
Threonine kinase	1	5	6	9
Ubiquitin fold modifier 1	2	0	2	3

## Sheet: PR6 Predicted Domains
Domain	Number of genes with 1 of the domain	Number of genes with multiple of the domain	Total number of genes	Percent of genes
Potato inhibitor I	12	5	17	94.4
Signal peptide region	1	0	1	5.6

## Sheet: PR7 Predicted Domains
Domain	Number of genes with 1 of the domain	Number of genes with multiple of the domain	Total number of genes	Percent of genes
BAH domain	1	2	3	1.6
C-JID domain	2	0	2	1.1
Disordered region	15	13	28	15
Fibronectin type-III domain	113	21	134	71.3
Glycosyltransferase 61	1	0	1	0.5
Leucine Rich Repeat	1	0	1	0.5
NB-ARC domain	3	0	3	1.6
Nucleoside transporter	3	0	3	1.6
PA domain	62	9	71	37.8
PHD-finger	2	1	3	1.6
Peptidase inhibitor I9	107	21	128	68.1
Signal peptide region	84	0	84	44.7
Sodium/hydrogen exchanger	1	0	1	0.5
Subtilase	131	24	155	82.4
TIR domain	3	0	3	1.6
Tetratricopeptide repeat	3	0	3	1.6
Transmembrane domain	15	11	26	13.8
bZIP domain	3	0	3	1.6

## Sheet: PR8 Predicted Domains
Domain	Number of genes with 1 of the domain	Number of genes with multiple of the domain	Total number of genes	Percent of genes
Glycosyl hydrolase 18	15	0	15	78.9
Signal peptide region	11	0	11	57.9

## Sheet: PR9 Predicted Domains
Domain	Number of genes with 1 of the domain	Number of genes with multiple of the domain	Total number of genes	Percent of genes
CYTH domain	4	0	4	1.7
Chloroplast envelope transporter	3	0	3	1.3
Dimerisation region	1	0	1	0.4
Disordered region	1	20	21	9.1
HYPK UBA domain	1	0	1	0.4
Heavy-metal associated	4	0	4	1.7
NAC domain	1	0	1	0.4
PPR repeat	0	2	2	0.9
Peroxidase	194	22	216	93.5
Phosphoribulokinase	4	0	4	1.7
Ribosomal protein S21e	3	0	3	1.3
Scorpion toxin-like	1	0	1	0.4
Serpin	0	1	1	0.4
Signal peptide region	164	0	164	71
Transmembrane domain	27	8	35	15.6

## Sheet: PR10 Predicted Domains
Domain	Number of genes with 1 of the domain	Number of genes with multiple of the domain	Total number of genes	Percent of genes
Bet v 1	40	10	50	75.8
Disordered region	0	1	1	1.5
NB-ARC	1	0	1	1.5
Transmembrane domain	1	7	8	12.1

[truncated: 6 more sheets: PR11 Predicted Domains, PR12 Predicted Domains, PR14 Predicted Domains, PR16 Predicted Domains, PR17 Predicted Domains, PR18 Predicted Domains]
