# Supplementary material for: Pathogenesis-related proteins are evolutionarily conserved across diploid and octoploid Fragaria species
Source: Research Square preprint supplement (doi:10.21203/rs.3.rs-7264946/v1), 2025-08-27
Supplement: Supplementary file 8 [file c1fedf4342d07637e20a7639.xlsx]

## Sheet: Sheet1
Gene	ERR1817363	ERR1817364	ERR1817365	ERR1817366	ERR1817367	ERR1817368	SRR10076578	SRR10076579	SRR10076584	SRR10076587	SRR11794975	SRR11794980	SRR5241935	SRR5241937	SRR5241942	SRR5826131	SRR5826134	SRR5826136	SRR5826138	SRR6995967	SRR6995969	SRR6995971	SRR7157738	SRR7157740	SRR8298763	SRR8298764	SRR8298765	SRR8298766	SRR8298767	SRR8298768	SRR8298769	SRR8298770	SRR8298771	SRR8298772
Fxa1AgPR18_1	0	0	0	0	0	0	0	0	0	0	0	0	0	0	0	0	0	0	0	0	0	0	0	0	0	0	0	0	0	0	0	0	0	0
Fxa1AgPR18_2	0	0	0	0	0	0	0	0	0	0	0	0	0	0	0	0	0	0	0	0	0	0	0	0	0	0	0	0	0	0	0	0	0	0
Fxa1AgPR7_1	0	0	0	0	0.0578941	0.210307	0	0	0	0	0	0	0	0	0	0	0	0	0	0	0	0	0	0	0	0	0	0	0	0	0	0	0	0
Fxa1AgPR7_2	0	0	0	0	0	0.0483314	0	0	0	0	0.129162	0.0683298	0	0	0	0	0.0533629	0	0	0	0	0	0	0	0	0	0	0	0	0	0	0	0	0
Fxa1CgPR7_3	0	0	0	0	0	0	0	0	0	0	0	0.123262	0.0321201	0	0	0	0	0	0	0	0	0	0	0	0	0	0	0	0	0	0	0	0	0.555288
Fxa1DgPR7_4	0	0	0	0	0	0	0	0	0	0	0	0.0685427	0	0	0	0	0	0	0	0	0	0	0	0	0	0	0	0	0	0	0	0	0	0
Fxa1DgPR8_1	0	0	0	0	0	0	0	0	0	0	0	0	0	0	0	0	0	0	0	0	0	0	0	0	0	0	0	0	0.0825036	0	0	0	0	0
Fxa2AgPR17_1	0	0	0	0	0	0	0	0	0	0	0	0	0	0	0	0	0	0	0	0	0	0	0	0	0	0	0	0	0	0	0	0	0	0
Fxa2AgPR17_2	0	0	0	0	0	0	0	0	0	0	0	0	0	0	0	0	0	0	0	0	0	0	0	0	0	0	0	0	0	0	0	0	0	0
Fxa2AgPR17_3	0	0	0	0	0	0	0	0	0	0	0	0	0	0	0	0	0	0	0	0	0	0	0	0	0	0	0	0	0	0	0	0	0	0
Fxa2AgPR5_1	0.0166579	0.175769	0	0.694739	0.706133	0.907174	0	0	0	0	0.167196	0.0663383	0.795191	0.948695	0.501114	0	0	0	0	0	0	0.0146473	0.0874533	0.056785	0.181796	0.428678	0.256172	0.209543	0.205969	0.0907746	0.191088	0.0688525	0.920162	0.149425
Fxa2AgPR5_2	0	0	0	0	0	0	0	0	0	0	0	0	0	0	0	0	0	0	0	0	0	0	0	0	0	0	0	0	0	0	0	0	0	0
Fxa2AgPR9_1	0	0	0	0	0.0154803	0	0.0260739	0	0.0212388	0.0207775	0	0	0	0.00958103	0	0	0	0	0	0	0.0278719	0	0	0	0	0	0	0	0.02057	0	0	0	0	0
Fxa2CgPR16_1	0	0	0	0	0	0	0	0	0	0	0	0.0811889	0	0	0	0	0	0	0	0	0	0	0	0	0	0	0	0	0	0	0	0	0	0
Fxa2CgPR16_2	0	0	0	0	0	0.0200292	0	0	0	0	0.0267633	0	0	0	0	0	0	0	0	0	0	0	0	0	0	0	0	0	0	0	0	0	0	0
Fxa2DgPR17_4	0	0	0	0.11661	0	0	0	0	0	0	0	0	0	0	0	0	0	0	0	0	0.0156144	0	0	0	0	0	0	0	0	0	0	0	0	0
Fxa3AgPR7_5	0	0.0123772	0	0	0	0	0	0	0	0	0.0176603	0	0	0	0.0144357	0	0	0.00736722	0	0	0	0	0	0	0	0	0	0	0	0	0	0	0	0.0105222
Fxa3AgPR7_6	0	0	0	0	0	0	0	0	0	0	0.118154	0.125013	0	0	0	0	0	0	0	0	0	0	0	0	0	0	0	0	0	0	0	0	0	0
Fxa3AgPR7_7	0	0	0	0	0	0	0	0	0	0.0712097	0	0.272473	0	0.131346	0	0	0	0	0	0.0439416	0	0	0	0	0.140006	1.49661	0.526091	0	0	0.0699077	0.420461	0	0	0.0767174
Fxa3AgPR7_8	0.102629	0	0	0	0	0	0	0	0	0	0	0.0681183	0	0	0	0	0	0	0	0	0	0	0	0	0	0	0	0	0	0	0	0	0	0
Fxa3AgPR7_9	0	0	0	0	0	0	0	0	0	0	0	0	0	0	0	0	0	0	0	0	0	0	0	0	0	0	0	0	0	0	0	0	0	0
Fxa3CgPR7_10	0	0	0	0.0314269	0	0	0	0	0	0.0376444	0.0680689	0	0	0.104153	0	0	0	0	0	0.0232293	0	0.0238529	0	0	0	0	0	0	0	0	0	0	0	0
Fxa3CgPR7_11	0.0563284	0.0433386	0.037254	0.0244713	0	0.0330559	1.09128	0.681267	1.0687	0.801215	0	0	0.0340986	0.0856066	0.139604	0	0	0	0	0.180881	0.20316	0.142398	0.103503	0	0.0768425	0.0483189	0.0962489	0.0442852	0.0870598	0.0959226	0.0115386	0.126113	0.0432154	0.136846
Fxa3DgPR4_1	0.0127009	0.0223359	0.01344	0.014714	0.0262631	0.0954037	0	0	0	0	0	0.0168599	0.00878688	0.00812736	0	0	0	0	0.01373	0	0	0	0	0.0577278	0	0.0871591	0	0.0399416	0	0.224937	0.0832544	0.0349978	0	0.11393
Fxa4AgPR6_1	65.3119	60.3208	58.1856	350.966	357.626	344.603	0.229078	0	0.653094	0.182545	10.0674	3.4051	8.14513	35.3119	35.48	0.435454	0.409116	0.619636	0.42661	0.394253	0	0.0578337	35.2208	27.0548	30.5965	146.579	17.757	32.1637	22.8613	13.1718	183.557	6.70584	22.0682	214.168
Fxa4AgPR6_2	0	0	0	4.66217	5.71222	4.73927	0	0	0	0	0.171153	0	0.283133	0	0	0	0	0	0	0	0	0	0.0716181	0	0	0.117019	0	0	0	0	0	0	0.558184	0.101974
Fxa4BgPR3_1	0	0	0	0.0214545	0.0191471	0	0	0.298641	0	0.0256991	0	0.0245835	0.0640608	0	0	0	0	0	0.0800787	0.063433	0	0	0	0	0	0	0	0	0	0.0252293	0.0303483	0	0	0
Fxa4BgPR6_3	0	0	0	0	0	0	0	0	0	0	0	0	0	0	0	0	0	0	0	0	0	0	0	0	0	0	0	0	0	0	0	0	0	0
Fxa4CgPR6_4	0	0	0	0	0	0	0	0	0	0	0	0	0	0	0	0	0	0	0	0	0	0	0	0	0	0	0	0	0	0	0	0	0	0
Fxa4CgPR6_5	0	0	0	0.225147	0.18658	0.280233	0	0	0	0	0	0	0.00480188	0.00444146	0	0	0	0	0	0	0	0	0	0	0	1.17886	0	0	0	0	0.784825	0.0191257	0.0994002	0.186782
Fxa4CgPR6_6	0	0	0	0.381819	0.340754	0.329423	0	0	0	0	0	0	0	0.0136064	0	0	0	0	0	0	0	0	0	0	0	3.84857	0	0	0	0	2.45658	0.131831	0.282762	0.524523
Fxa4CgPR6_7	0.405909	0.178459	0.322149	318.907	325.107	321.037	0	0	0	0	0	0	3.13584	2.61908	3.7465	0	0	0	0	0	0	0	1.84687	0	0.323013	47.8764	0.173395	0.106375	0.139414	0.046082	43.3479	4.14778	16.0552	20.0766
Fxa4CgPR6_8	0	0	0.00747621	0.360136	0.357927	0.271983	0	0	0	0	0	0	0	0	0	0	0	0	0	0	0	0	0	0	0	0.0363627	0	0.0111091	0	0	0	0.0194681	0.0144542	0
Fxa4CgPR6_9	0.263089	0.231336	0.1392	137.232	158.174	153.651	0	0	0	0	0	0	2.18417	3.11452	4.49683	0	0	0	0	0	0	0	0.897785	0	0	83.84	0	0.20684	0	0.0896039	77.0661	3.35292	8.61198	27.238
Fxa5AgPR11_1	0	0	0.0573176	0	0.0560021	0.0508586	0	0	0.153669	0.601326	0.271831	0	1.68631	1.7677	2.259	0.0597682	0	0	0	0.0463828	0	0	0	0	0.81281	0.557562	1.20319	3.0661	2.08362	3.83716	1.77528	0	0	2.3484
Fxa5CgPR7_12	0	0	0	0	0	0	0	0.0146224	0	0.113248	0	0.0216664	0	0	0	0	0	0	0	0	0	0	0.00856879	0	0	0	0	0	0	0.0889421	0	0	0	0.0122007
Fxa6AgPR4_2	0	0	0	0	0	0	0	0	0	0	0.113634	0	0	0	0	0	0	0	0	0	0	0	0	0	0	0	0	0	0	0	0	0	0	0
Fxa6BgPR17_5	21.8722	21.1233	21.48	0.243061	0.0542299	0.0984982	0.548048	0.469908	0.967241	0.0727871	4.34327	1.32292	12.1201	11.0425	40.9172	0.347261	0.163128	0	0.0567013	0.17966	0.292919	0.507326	18.9453	23.3633	25.4015	24.2963	38.5384	26.2268	10.0884	4.14446	12.9792	0.289064	0.214618	6.43018
Fxa6CgPR17_6	2.81559	2.48378	2.5359	0	0.0471046	0	0	0.0163267	0	0	0.274371	0.169341	1.88488	2.78712	5.82487	0.110599	0.160587	0.123995	0.0886523	0.00780271	0.0169621	0.0160243	3.77915	5.29083	1.30519	2.14166	3.86128	3.26669	1.43962	0.471714	1.29911	0.0502168	0	0.367813
Fxa6CgPR7_13	0	0.0397116	0	0	0	0	0	0	0.0640637	0	0.226649	0.119903	0	0	0	0	0	0	0	0	0	0	0	0	0	0	0	0	0	0	0	0	0	0
Fxa6DgPR4_3	0	0	0	0	0	0.0477018	0	0	0	0	0.0318698	0.0337199	0	0	0	0	0	0	0	0	0	0	0	0	0	0	0	0	0	0	0	0	0	0
Fxa6DgPR4_4	0	0	0	0	0	0	0	0	0	0	0	0.226827	0	0	0	0	0	0	0	0	0	0	0	0	0	0	0	0	0	0	0	0	0	0
Fxa7AgPR7_14	0	0	0	0	0	0	0	0	0	0	0	0	0	0	0	0	0	0	0	0	0	0	0	0	0	0	0	0	0	0	0	0	0	0
Fxa7AgPR7_15	0.0646184	0	0	0	0	0	0	0	0	0	0	0	0	0	0	0	0	0	0	0	0	0	0	0	0	0	0	0	0	0	0	0	0	0
Fxa7CgPR14_1	0	0	0	0	0	0	0	0	0	0	0	0	0	0	0	0	0	0	0	0	0	0	0	0	0	0	0	0	0	0	0	0	1.53327	0
Fxa7CgPR7_16	0	0	0	0	0	0	0	0	0	0	0	0	0	0	0	0	0	0	0	0	0	0	0	0	0	0	0	0	0	0	0	0	0	0
Fxa7CgPR7_17	0	0	0	0	0	0	0	0	0	0	0	0	0	0	0	0	0	0	0	0	0	0	0	0	0	0	0	0	0	0	0	0	0	0
Fxa7CgPR7_18	0	0	0	0	0	0	0	0	0	0	0	0	0	0	0	0	0	0	0	0	0	0	0	0	0	0	0	0	0	0	0	0	0	0
Fxa7CgPR7_19	0	0	0	0.0111379	0	0.0090271	0	0	0	0	0	0.0127623	0	0	0.00657309	0	0	0	0	0	0	0	0	0	0	0	0	0	0	0	0	0.06623	0.255699	0
Fxa7CgPR8_2	0	0	0	0.0187152	0.0167024	0	0	0	0	0	0	0	0	0.0103374	0	0	0	0	0	0	0	0	0	0	0	0	0	0	0	0	0.0264734	0	0	0
Fxa7DgPR14_2	0	0	0	0	0	0	0	0	0	0	0	0	0	0	0	0	0	0	0	0	0	0	0	0	0	0	0	0	0	0	0	0	0	0
